# Supplementary material for: Uncovering transcriptional regulatory network during regeneration for boosting wheat transformation
Source: Research Square preprint supplement (doi:10.21203/rs.3.rs-2192210/v1), 2022-10-28
Supplement: Supplementary file 1 [file 034fc8c0c704ad2b1a231dc2.xlsx]

## Sheet: Table S20
Table S20. Classification of DEGs in wheat.
wheatID	wheat.cluster	deg.group	RNA.group	ATAC.group
TraesCS1A02G005800	C2	Ortho.DEG	RNA.distinct	ATAC.distinct
TraesCS1A02G005900	C1	Ortho.DEG	RNA.similar	ATAC.similar
TraesCS1A02G013800	C4	Ortho.DEG	RNA.distinct	ATAC.distinct
TraesCS1A02G015100	C2	Ortho.DEG	RNA.distinct	ATAC.distinct
TraesCS1A02G019000	C5	Ortho.DEG	RNA.distinct	ATAC.similar
TraesCS1A02G020600	C6	Ortho.DEG	RNA.similar	ATAC.distinct
TraesCS1A02G021100	C1	Ortho.DEG	RNA.similar	ATAC.distinct
TraesCS1A02G023300	C3	Ortho.DEG	RNA.distinct	ATAC.distinct
TraesCS1A02G023400	C3	Ortho.DEG	RNA.distinct	ATAC.distinct
TraesCS1A02G029300	C2	Ortho.DEG	RNA.distinct	ATAC.distinct
TraesCS1A02G029900	C2	Ortho.DEG	RNA.similar	ATAC.similar
TraesCS1A02G030100	C1	Ortho.DEG	RNA.distinct	ATAC.distinct
TraesCS1A02G030500	C6	Ortho.DEG	RNA.similar	ATAC.distinct
TraesCS1A02G030600	C1	Ortho.DEG	RNA.distinct	ATAC.distinct
TraesCS1A02G030700	C3	Ortho.DEG	RNA.distinct	ATAC.distinct
TraesCS1A02G031200	C4	Ortho.DEG	RNA.distinct	ATAC.similar
TraesCS1A02G033200	C1	Ortho.DEG	RNA.similar	ATAC.distinct
TraesCS1A02G033500	C1	Ortho.DEG	RNA.distinct	ATAC.distinct
TraesCS1A02G033600	C1	Ortho.DEG	RNA.distinct	ATAC.similar
TraesCS1A02G034100	C2	Ortho.DEG	RNA.distinct	ATAC.distinct
TraesCS1A02G035100	C2	Ortho.DEG	RNA.distinct	ATAC.distinct
TraesCS1A02G035200	C1	Ortho.DEG	RNA.similar	ATAC.similar
TraesCS1A02G035600	C5	Ortho.DEG	RNA.similar	ATAC.distinct
TraesCS1A02G036100	C4	Ortho.DEG	RNA.distinct	ATAC.distinct
TraesCS1A02G036700	C6	Ortho.DEG	RNA.similar	ATAC.distinct
TraesCS1A02G037800	C5	Ortho.DEG	RNA.distinct	ATAC.similar
TraesCS1A02G038400	C4	Ortho.DEG	RNA.distinct	ATAC.distinct
TraesCS1A02G039200	C3	Ortho.DEG	RNA.similar	ATAC.distinct
TraesCS1A02G039300	C3	Ortho.DEG	RNA.distinct	ATAC.distinct
TraesCS1A02G040400	C6	Ortho.DEG	RNA.similar	ATAC.distinct
TraesCS1A02G040500	C5	Ortho.DEG	RNA.distinct	ATAC.distinct
TraesCS1A02G042500	C2	Ortho.DEG	RNA.similar	ATAC.distinct
TraesCS1A02G042900	C3	Ortho.DEG	RNA.similar	ATAC.distinct
TraesCS1A02G043100	C3	Ortho.DEG	RNA.similar	ATAC.similar
TraesCS1A02G043600	C5	Ortho.DEG	RNA.distinct	ATAC.distinct
TraesCS1A02G044600	C4	Ortho.DEG	RNA.distinct	ATAC.distinct
TraesCS1A02G045400	C5	Ortho.DEG	RNA.distinct	ATAC.similar
TraesCS1A02G045700	C1	Ortho.DEG	RNA.similar	ATAC.similar
TraesCS1A02G049600	C5	Ortho.DEG	RNA.similar	ATAC.similar
TraesCS1A02G049800	C5	Ortho.DEG	RNA.distinct	ATAC.distinct
TraesCS1A02G050100	C3	Ortho.DEG	RNA.distinct	ATAC.distinct
TraesCS1A02G051800	C1	Ortho.DEG	RNA.similar	ATAC.distinct
TraesCS1A02G052300	C5	Ortho.DEG	RNA.distinct	ATAC.similar
TraesCS1A02G054400	C3	Ortho.DEG	RNA.distinct	ATAC.distinct
TraesCS1A02G055200	C3	Ortho.DEG	RNA.distinct	ATAC.distinct
TraesCS1A02G056600	C3	Ortho.DEG	RNA.distinct	ATAC.distinct
TraesCS1A02G057200	C1	Ortho.DEG	RNA.similar	ATAC.similar
TraesCS1A02G058400	C3	Ortho.DEG	RNA.distinct	ATAC.distinct
TraesCS1A02G059200	C3	Ortho.DEG	RNA.distinct	ATAC.distinct
TraesCS1A02G060500	C4	Ortho.DEG	RNA.similar	ATAC.distinct
TraesCS1A02G060700	C4	Ortho.DEG	RNA.similar	ATAC.distinct
TraesCS1A02G064000	C5	Ortho.DEG	RNA.similar	ATAC.distinct
TraesCS1A02G065000	C3	Ortho.DEG	RNA.similar	ATAC.distinct
TraesCS1A02G065300	C5	Ortho.DEG	RNA.distinct	ATAC.distinct
TraesCS1A02G065400	C5	Ortho.DEG	RNA.distinct	ATAC.distinct
TraesCS1A02G065600	C4	Ortho.DEG	RNA.distinct	ATAC.distinct
TraesCS1A02G066200	C1	Ortho.DEG	RNA.distinct	ATAC.distinct
TraesCS1A02G067200	C6	Ortho.DEG	RNA.similar	ATAC.distinct
TraesCS1A02G069300	C6	Ortho.DEG	RNA.distinct	ATAC.similar
TraesCS1A02G069600	C1	Ortho.DEG	RNA.similar	ATAC.distinct
TraesCS1A02G069700	C6	Ortho.DEG	RNA.similar	ATAC.distinct
TraesCS1A02G070200	C1	Ortho.DEG	RNA.similar	ATAC.distinct
TraesCS1A02G071800	C5	Ortho.DEG	RNA.distinct	ATAC.distinct
TraesCS1A02G072600	C1	Ortho.DEG	RNA.similar	ATAC.distinct
TraesCS1A02G075000	C1	Ortho.DEG	RNA.distinct	ATAC.distinct
TraesCS1A02G075500	C3	Ortho.DEG	RNA.similar	ATAC.similar
TraesCS1A02G075700	C5	Ortho.DEG	RNA.distinct	ATAC.distinct
TraesCS1A02G076200	C1	Ortho.DEG	RNA.similar	ATAC.similar
TraesCS1A02G076500	C4	Ortho.DEG	RNA.distinct	ATAC.similar
TraesCS1A02G077500	C1	Ortho.DEG	RNA.similar	ATAC.distinct
TraesCS1A02G077800	C4	Ortho.DEG	RNA.similar	ATAC.similar
TraesCS1A02G079700	C1	Ortho.DEG	RNA.similar	ATAC.distinct
TraesCS1A02G080000	C5	Ortho.DEG	RNA.similar	ATAC.distinct
TraesCS1A02G080200	C4	Ortho.DEG	RNA.similar	ATAC.distinct
TraesCS1A02G080300	C6	Ortho.DEG	RNA.distinct	ATAC.distinct
TraesCS1A02G080500	C3	Ortho.DEG	RNA.distinct	ATAC.similar
TraesCS1A02G080600	C3	Ortho.DEG	RNA.distinct	ATAC.similar
TraesCS1A02G080700	C3	Ortho.DEG	RNA.distinct	ATAC.distinct
TraesCS1A02G081300	C6	Ortho.DEG	RNA.similar	ATAC.similar
TraesCS1A02G082400	C4	Ortho.DEG	RNA.distinct	ATAC.distinct
TraesCS1A02G083000	C1	Ortho.DEG	RNA.similar	ATAC.similar
TraesCS1A02G083300	C4	Ortho.DEG	RNA.distinct	ATAC.distinct
TraesCS1A02G083800	C1	Ortho.DEG	RNA.similar	ATAC.distinct
TraesCS1A02G084500	C1	Ortho.DEG	RNA.distinct	ATAC.distinct
TraesCS1A02G085500	C5	Ortho.DEG	RNA.distinct	ATAC.distinct
TraesCS1A02G086100	C3	Ortho.DEG	RNA.distinct	ATAC.distinct
TraesCS1A02G086600	C4	Ortho.DEG	RNA.similar	ATAC.distinct
TraesCS1A02G086800	C1	Ortho.DEG	RNA.distinct	ATAC.distinct
TraesCS1A02G087100	C3	Ortho.DEG	RNA.distinct	ATAC.distinct
TraesCS1A02G088600	C6	Ortho.DEG	RNA.similar	ATAC.distinct
TraesCS1A02G088900	C6	Ortho.DEG	RNA.distinct	ATAC.distinct
TraesCS1A02G090300	C2	Ortho.DEG	RNA.similar	ATAC.distinct
TraesCS1A02G090600	C5	Ortho.DEG	RNA.distinct	ATAC.distinct
TraesCS1A02G091300	C3	Ortho.DEG	RNA.similar	ATAC.similar
TraesCS1A02G091400	C2	Ortho.DEG	RNA.similar	ATAC.distinct
TraesCS1A02G091500	C1	Ortho.DEG	RNA.distinct	ATAC.similar
TraesCS1A02G093000	C1	Ortho.DEG	RNA.distinct	ATAC.distinct
TraesCS1A02G094000	C6	Ortho.DEG	RNA.distinct	ATAC.distinct
TraesCS1A02G094200	C5	Ortho.DEG	RNA.distinct	ATAC.similar
TraesCS1A02G094900	C2	Ortho.DEG	RNA.distinct	ATAC.distinct
TraesCS1A02G095500	C1	Ortho.DEG	RNA.similar	ATAC.distinct
TraesCS1A02G095800	C3	Ortho.DEG	RNA.distinct	ATAC.distinct
TraesCS1A02G097700	C5	Ortho.DEG	RNA.similar	ATAC.distinct
TraesCS1A02G099000	C1	Ortho.DEG	RNA.similar	ATAC.distinct
TraesCS1A02G099300	C6	Ortho.DEG	RNA.similar	ATAC.similar
TraesCS1A02G099500	C1	Ortho.DEG	RNA.distinct	ATAC.distinct
TraesCS1A02G102300	C3	Ortho.DEG	RNA.distinct	ATAC.distinct
TraesCS1A02G102600	C6	Ortho.DEG	RNA.similar	ATAC.distinct
TraesCS1A02G103900	C5	Ortho.DEG	RNA.distinct	ATAC.similar
TraesCS1A02G104700	C6	Ortho.DEG	RNA.similar	ATAC.similar
TraesCS1A02G105300	C1	Ortho.DEG	RNA.similar	ATAC.distinct
TraesCS1A02G105400	C5	Ortho.DEG	RNA.distinct	ATAC.distinct
TraesCS1A02G105800	C5	Ortho.DEG	RNA.distinct	ATAC.similar
TraesCS1A02G105900	C5	Ortho.DEG	RNA.distinct	ATAC.distinct
TraesCS1A02G106300	C2	Ortho.DEG	RNA.distinct	ATAC.distinct
TraesCS1A02G106600	C5	Ortho.DEG	RNA.distinct	ATAC.distinct
TraesCS1A02G108100	C1	Ortho.DEG	RNA.similar	ATAC.distinct
TraesCS1A02G109400	C4	Ortho.DEG	RNA.similar	ATAC.distinct
TraesCS1A02G109500	C5	Ortho.DEG	RNA.distinct	ATAC.distinct
TraesCS1A02G110000	C1	Ortho.DEG	RNA.similar	ATAC.similar
TraesCS1A02G110900	C5	Ortho.DEG	RNA.distinct	ATAC.distinct
TraesCS1A02G111000	C5	Ortho.DEG	RNA.distinct	ATAC.distinct
TraesCS1A02G111100	C4	Ortho.DEG	RNA.similar	ATAC.distinct
TraesCS1A02G111700	C3	Ortho.DEG	RNA.similar	ATAC.similar
TraesCS1A02G112100	C6	Ortho.DEG	RNA.similar	ATAC.distinct
TraesCS1A02G114600	C6	Ortho.DEG	RNA.similar	ATAC.distinct
TraesCS1A02G115200	C6	Ortho.DEG	RNA.distinct	ATAC.distinct
TraesCS1A02G115700	C5	Ortho.DEG	RNA.distinct	ATAC.distinct
TraesCS1A02G116000	C6	Ortho.DEG	RNA.similar	ATAC.distinct
TraesCS1A02G117300	C1	Ortho.DEG	RNA.distinct	ATAC.distinct
TraesCS1A02G117500	C1	Ortho.DEG	RNA.distinct	ATAC.similar
TraesCS1A02G118300	C2	Ortho.DEG	RNA.similar	ATAC.distinct
TraesCS1A02G118400	C5	Ortho.DEG	RNA.distinct	ATAC.similar
TraesCS1A02G119100	C6	Ortho.DEG	RNA.distinct	ATAC.distinct
TraesCS1A02G119400	C1	Ortho.DEG	RNA.similar	ATAC.distinct
TraesCS1A02G119500	C4	Ortho.DEG	RNA.similar	ATAC.distinct
TraesCS1A02G119600	C5	Ortho.DEG	RNA.similar	ATAC.distinct
TraesCS1A02G120100	C1	Ortho.DEG	RNA.distinct	ATAC.distinct
TraesCS1A02G120200	C1	Ortho.DEG	RNA.distinct	ATAC.distinct
TraesCS1A02G121300	C5	Ortho.DEG	RNA.distinct	ATAC.distinct
TraesCS1A02G122000	C2	Ortho.DEG	RNA.distinct	ATAC.distinct
TraesCS1A02G122500	C1	Ortho.DEG	RNA.distinct	ATAC.distinct
TraesCS1A02G122600	C4	Ortho.DEG	RNA.distinct	ATAC.distinct
TraesCS1A02G122800	C1	Ortho.DEG	RNA.distinct	ATAC.distinct
TraesCS1A02G122900	C4	Ortho.DEG	RNA.similar	ATAC.similar
TraesCS1A02G123200	C5	Ortho.DEG	RNA.distinct	ATAC.distinct
TraesCS1A02G124100	C3	Ortho.DEG	RNA.distinct	ATAC.distinct
TraesCS1A02G124400	C5	Ortho.DEG	RNA.distinct	ATAC.distinct
TraesCS1A02G124600	C5	Ortho.DEG	RNA.similar	ATAC.distinct
TraesCS1A02G125400	C3	Ortho.DEG	RNA.distinct	ATAC.similar
TraesCS1A02G125500	C2	Ortho.DEG	RNA.similar	ATAC.similar
TraesCS1A02G125700	C1	Ortho.DEG	RNA.similar	ATAC.distinct
TraesCS1A02G126800	C4	Ortho.DEG	RNA.distinct	ATAC.similar
TraesCS1A02G126900	C6	Ortho.DEG	RNA.similar	ATAC.similar
TraesCS1A02G127900	C1	Ortho.DEG	RNA.distinct	ATAC.distinct
TraesCS1A02G129100	C5	Ortho.DEG	RNA.distinct	ATAC.distinct
TraesCS1A02G130700	C2	Ortho.DEG	RNA.distinct	ATAC.distinct
TraesCS1A02G132400	C1	Ortho.DEG	RNA.distinct	ATAC.similar
TraesCS1A02G133400	C6	Ortho.DEG	RNA.distinct	ATAC.distinct
TraesCS1A02G135100	C2	Ortho.DEG	RNA.similar	ATAC.distinct
TraesCS1A02G136100	C5	Ortho.DEG	RNA.distinct	ATAC.distinct
TraesCS1A02G136900	C6	Ortho.DEG	RNA.similar	ATAC.distinct
TraesCS1A02G139900	C1	Ortho.DEG	RNA.similar	ATAC.distinct
TraesCS1A02G141100	C3	Ortho.DEG	RNA.distinct	ATAC.distinct
TraesCS1A02G141300	C3	Ortho.DEG	RNA.distinct	ATAC.distinct
TraesCS1A02G141900	C1	Ortho.DEG	RNA.similar	ATAC.distinct
TraesCS1A02G143000	C6	Ortho.DEG	RNA.distinct	ATAC.distinct
TraesCS1A02G143300	C1	Ortho.DEG	RNA.similar	ATAC.distinct
TraesCS1A02G143600	C6	Ortho.DEG	RNA.similar	ATAC.distinct
TraesCS1A02G143900	C1	Ortho.DEG	RNA.distinct	ATAC.similar
TraesCS1A02G145000	C5	Ortho.DEG	RNA.distinct	ATAC.distinct
TraesCS1A02G145100	C3	Ortho.DEG	RNA.similar	ATAC.distinct
TraesCS1A02G145800	C5	Ortho.DEG	RNA.distinct	ATAC.distinct
TraesCS1A02G147400	C1	Ortho.DEG	RNA.distinct	ATAC.distinct
TraesCS1A02G150200	C5	Ortho.DEG	RNA.distinct	ATAC.distinct
TraesCS1A02G150400	C4	Ortho.DEG	RNA.distinct	ATAC.similar
TraesCS1A02G151000	C1	Ortho.DEG	RNA.similar	ATAC.distinct
TraesCS1A02G151200	C6	Ortho.DEG	RNA.distinct	ATAC.distinct
TraesCS1A02G152100	C1	Ortho.DEG	RNA.similar	ATAC.similar
TraesCS1A02G152900	C6	Ortho.DEG	RNA.similar	ATAC.distinct
TraesCS1A02G153100	C1	Ortho.DEG	RNA.similar	ATAC.similar
TraesCS1A02G153600	C1	Ortho.DEG	RNA.distinct	ATAC.distinct
TraesCS1A02G154900	C1	Ortho.DEG	RNA.distinct	ATAC.distinct
TraesCS1A02G156100	C5	Ortho.DEG	RNA.distinct	ATAC.distinct
TraesCS1A02G156400	C6	Ortho.DEG	RNA.distinct	ATAC.distinct
TraesCS1A02G156500	C6	Ortho.DEG	RNA.distinct	ATAC.distinct
TraesCS1A02G156600	C2	Ortho.DEG	RNA.similar	ATAC.similar
TraesCS1A02G157700	C4	Ortho.DEG	RNA.distinct	ATAC.distinct
TraesCS1A02G160000	C3	Ortho.DEG	RNA.similar	ATAC.distinct
TraesCS1A02G161900	C1	Ortho.DEG	RNA.similar	ATAC.distinct
TraesCS1A02G162200	C6	Ortho.DEG	RNA.similar	ATAC.distinct
TraesCS1A02G164000	C1	Ortho.DEG	RNA.similar	ATAC.distinct
TraesCS1A02G164700	C1	Ortho.DEG	RNA.distinct	ATAC.distinct
TraesCS1A02G164800	C2	Ortho.DEG	RNA.distinct	ATAC.distinct
TraesCS1A02G164900	C5	Ortho.DEG	RNA.distinct	ATAC.distinct
TraesCS1A02G165400	C1	Ortho.DEG	RNA.similar	ATAC.distinct
TraesCS1A02G166900	C6	Ortho.DEG	RNA.similar	ATAC.similar
TraesCS1A02G167100	C1	Ortho.DEG	RNA.distinct	ATAC.distinct
TraesCS1A02G167600	C6	Ortho.DEG	RNA.distinct	ATAC.distinct
TraesCS1A02G168100	C5	Ortho.DEG	RNA.similar	ATAC.distinct
TraesCS1A02G168600	C1	Ortho.DEG	RNA.similar	ATAC.distinct
TraesCS1A02G169500	C4	Ortho.DEG	RNA.distinct	ATAC.distinct
TraesCS1A02G169600	C6	Ortho.DEG	RNA.distinct	ATAC.distinct
TraesCS1A02G170000	C1	Ortho.DEG	RNA.similar	ATAC.distinct
TraesCS1A02G170100	C2	Ortho.DEG	RNA.distinct	ATAC.distinct
TraesCS1A02G170800	C1	Ortho.DEG	RNA.distinct	ATAC.distinct
TraesCS1A02G170900	C5	Ortho.DEG	RNA.distinct	ATAC.distinct
TraesCS1A02G171000	C1	Ortho.DEG	RNA.similar	ATAC.similar
TraesCS1A02G171400	C5	Ortho.DEG	RNA.distinct	ATAC.distinct
TraesCS1A02G172300	C6	Ortho.DEG	RNA.similar	ATAC.distinct
TraesCS1A02G173200	C3	Ortho.DEG	RNA.distinct	ATAC.similar
TraesCS1A02G173400	C4	Ortho.DEG	RNA.distinct	ATAC.distinct
TraesCS1A02G173500	C1	Ortho.DEG	RNA.distinct	ATAC.distinct
TraesCS1A02G173700	C5	Ortho.DEG	RNA.distinct	ATAC.distinct
TraesCS1A02G174500	C3	Ortho.DEG	RNA.similar	ATAC.similar
TraesCS1A02G174700	C3	Ortho.DEG	RNA.distinct	ATAC.distinct
TraesCS1A02G174900	C3	Ortho.DEG	RNA.distinct	ATAC.similar
TraesCS1A02G175600	C6	Ortho.DEG	RNA.similar	ATAC.distinct
TraesCS1A02G176300	C4	Ortho.DEG	RNA.distinct	ATAC.distinct
TraesCS1A02G176700	C5	Ortho.DEG	RNA.distinct	ATAC.similar
TraesCS1A02G177000	C3	Ortho.DEG	RNA.distinct	ATAC.distinct
TraesCS1A02G177300	C1	Ortho.DEG	RNA.similar	ATAC.distinct
TraesCS1A02G177500	C5	Ortho.DEG	RNA.distinct	ATAC.similar
TraesCS1A02G177800	C5	Ortho.DEG	RNA.distinct	ATAC.distinct
TraesCS1A02G178300	C5	Ortho.DEG	RNA.distinct	ATAC.distinct
TraesCS1A02G178700	C5	Ortho.DEG	RNA.distinct	ATAC.distinct
TraesCS1A02G179500	C2	Ortho.DEG	RNA.distinct	ATAC.distinct
TraesCS1A02G180000	C4	Ortho.DEG	RNA.distinct	ATAC.distinct
TraesCS1A02G180800	C1	Ortho.DEG	RNA.similar	ATAC.distinct
TraesCS1A02G181000	C1	Ortho.DEG	RNA.similar	ATAC.distinct
TraesCS1A02G181900	C1	Ortho.DEG	RNA.similar	ATAC.distinct
TraesCS1A02G182300	C1	Ortho.DEG	RNA.distinct	ATAC.distinct
TraesCS1A02G182400	C5	Ortho.DEG	RNA.distinct	ATAC.distinct
TraesCS1A02G184900	C3	Ortho.DEG	RNA.distinct	ATAC.distinct
TraesCS1A02G187000	C6	Ortho.DEG	RNA.distinct	ATAC.similar
TraesCS1A02G188700	C1	Ortho.DEG	RNA.similar	ATAC.distinct
TraesCS1A02G188900	C1	Ortho.DEG	RNA.similar	ATAC.similar
TraesCS1A02G189000	C4	Ortho.DEG	RNA.distinct	ATAC.distinct
TraesCS1A02G189600	C5	Ortho.DEG	RNA.distinct	ATAC.distinct
TraesCS1A02G190100	C5	Ortho.DEG	RNA.similar	ATAC.similar
TraesCS1A02G190900	C4	Ortho.DEG	RNA.similar	ATAC.similar
TraesCS1A02G192800	C1	Ortho.DEG	RNA.similar	ATAC.distinct
TraesCS1A02G193200	C1	Ortho.DEG	RNA.similar	ATAC.similar
TraesCS1A02G193400	C3	Ortho.DEG	RNA.distinct	ATAC.distinct
TraesCS1A02G194200	C1	Ortho.DEG	RNA.distinct	ATAC.distinct
TraesCS1A02G195100	C5	Ortho.DEG	RNA.distinct	ATAC.distinct
TraesCS1A02G195300	C6	Ortho.DEG	RNA.similar	ATAC.distinct
TraesCS1A02G195900	C6	Ortho.DEG	RNA.distinct	ATAC.similar
TraesCS1A02G196400	C5	Ortho.DEG	RNA.distinct	ATAC.distinct
TraesCS1A02G196800	C1	Ortho.DEG	RNA.similar	ATAC.distinct
TraesCS1A02G197200	C1	Ortho.DEG	RNA.similar	ATAC.distinct
TraesCS1A02G198500	C1	Ortho.DEG	RNA.similar	ATAC.distinct
TraesCS1A02G200800	C1	Ortho.DEG	RNA.similar	ATAC.distinct
TraesCS1A02G201600	C1	Ortho.DEG	RNA.similar	ATAC.distinct
TraesCS1A02G201700	C5	Ortho.DEG	RNA.distinct	ATAC.distinct
TraesCS1A02G202000	C6	Ortho.DEG	RNA.distinct	ATAC.similar
TraesCS1A02G203100	C6	Ortho.DEG	RNA.distinct	ATAC.similar
TraesCS1A02G203200	C1	Ortho.DEG	RNA.similar	ATAC.distinct
TraesCS1A02G203400	C1	Ortho.DEG	RNA.distinct	ATAC.distinct
TraesCS1A02G203600	C3	Ortho.DEG	RNA.distinct	ATAC.distinct
TraesCS1A02G205100	C1	Ortho.DEG	RNA.similar	ATAC.distinct
TraesCS1A02G205700	C1	Ortho.DEG	RNA.similar	ATAC.similar
TraesCS1A02G206100	C5	Ortho.DEG	RNA.distinct	ATAC.distinct
TraesCS1A02G207500	C2	Ortho.DEG	RNA.distinct	ATAC.distinct
TraesCS1A02G208600	C6	Ortho.DEG	RNA.similar	ATAC.distinct
TraesCS1A02G208900	C5	Ortho.DEG	RNA.distinct	ATAC.distinct
TraesCS1A02G209000	C6	Ortho.DEG	RNA.similar	ATAC.distinct
TraesCS1A02G209100	C1	Ortho.DEG	RNA.similar	ATAC.similar
TraesCS1A02G209400	C5	Ortho.DEG	RNA.distinct	ATAC.similar
TraesCS1A02G210400	C5	Ortho.DEG	RNA.distinct	ATAC.distinct
TraesCS1A02G210600	C5	Ortho.DEG	RNA.distinct	ATAC.distinct
TraesCS1A02G210800	C2	Ortho.DEG	RNA.distinct	ATAC.similar
TraesCS1A02G211200	C3	Ortho.DEG	RNA.distinct	ATAC.distinct
TraesCS1A02G211500	C1	Ortho.DEG	RNA.similar	ATAC.distinct
TraesCS1A02G212000	C3	Ortho.DEG	RNA.distinct	ATAC.similar
TraesCS1A02G212200	C3	Ortho.DEG	RNA.distinct	ATAC.distinct
TraesCS1A02G212300	C3	Ortho.DEG	RNA.distinct	ATAC.distinct
TraesCS1A02G212400	C3	Ortho.DEG	RNA.distinct	ATAC.distinct
TraesCS1A02G212600	C3	Ortho.DEG	RNA.distinct	ATAC.distinct
TraesCS1A02G213000	C1	Ortho.DEG	RNA.distinct	ATAC.similar
TraesCS1A02G213800	C3	Ortho.DEG	RNA.similar	ATAC.distinct
TraesCS1A02G213900	C1	Ortho.DEG	RNA.similar	ATAC.distinct
TraesCS1A02G214600	C1	Ortho.DEG	RNA.distinct	ATAC.distinct
TraesCS1A02G215500	C1	Ortho.DEG	RNA.similar	ATAC.distinct
TraesCS1A02G215600	C1	Ortho.DEG	RNA.distinct	ATAC.distinct
TraesCS1A02G215800	C6	Ortho.DEG	RNA.similar	ATAC.distinct
TraesCS1A02G216300	C4	Ortho.DEG	RNA.distinct	ATAC.distinct
TraesCS1A02G217600	C1	Ortho.DEG	RNA.similar	ATAC.distinct
TraesCS1A02G218100	C1	Ortho.DEG	RNA.similar	ATAC.similar
TraesCS1A02G218600	C1	Ortho.DEG	RNA.distinct	ATAC.distinct
TraesCS1A02G218900	C3	Ortho.DEG	RNA.distinct	ATAC.distinct
TraesCS1A02G219200	C6	Ortho.DEG	RNA.similar	ATAC.similar
TraesCS1A02G220000	C1	Ortho.DEG	RNA.similar	ATAC.distinct
TraesCS1A02G220700	C2	Ortho.DEG	RNA.similar	ATAC.distinct
TraesCS1A02G220900	C3	Ortho.DEG	RNA.distinct	ATAC.distinct
TraesCS1A02G221900	C1	Ortho.DEG	RNA.similar	ATAC.distinct
TraesCS1A02G222500	C3	Ortho.DEG	RNA.distinct	ATAC.distinct
TraesCS1A02G223300	C1	Ortho.DEG	RNA.distinct	ATAC.similar
TraesCS1A02G225200	C5	Ortho.DEG	RNA.distinct	ATAC.distinct
TraesCS1A02G225600	C3	Ortho.DEG	RNA.similar	ATAC.distinct
TraesCS1A02G225700	C3	Ortho.DEG	RNA.distinct	ATAC.distinct
TraesCS1A02G226100	C6	Ortho.DEG	RNA.similar	ATAC.distinct
TraesCS1A02G227300	C2	Ortho.DEG	RNA.distinct	ATAC.distinct
TraesCS1A02G227700	C6	Ortho.DEG	RNA.similar	ATAC.distinct
TraesCS1A02G228200	C1	Ortho.DEG	RNA.similar	ATAC.similar
TraesCS1A02G228700	C1	Ortho.DEG	RNA.similar	ATAC.distinct
TraesCS1A02G228900	C5	Ortho.DEG	RNA.distinct	ATAC.distinct
TraesCS1A02G229100	C1	Ortho.DEG	RNA.distinct	ATAC.similar
TraesCS1A02G229900	C4	Ortho.DEG	RNA.distinct	ATAC.distinct
TraesCS1A02G230300	C5	Ortho.DEG	RNA.distinct	ATAC.distinct
TraesCS1A02G230400	C5	Ortho.DEG	RNA.distinct	ATAC.distinct
TraesCS1A02G230500	C1	Ortho.DEG	RNA.distinct	ATAC.distinct
TraesCS1A02G231000	C5	Ortho.DEG	RNA.distinct	ATAC.distinct
TraesCS1A02G231200	C1	Ortho.DEG	RNA.similar	ATAC.distinct
TraesCS1A02G232200	C5	Ortho.DEG	RNA.distinct	ATAC.distinct
TraesCS1A02G233700	C5	Ortho.DEG	RNA.distinct	ATAC.distinct
TraesCS1A02G233800	C1	Ortho.DEG	RNA.distinct	ATAC.distinct
TraesCS1A02G234100	C2	Ortho.DEG	RNA.distinct	ATAC.distinct
TraesCS1A02G235200	C6	Ortho.DEG	RNA.similar	ATAC.distinct
TraesCS1A02G236000	C2	Ortho.DEG	RNA.distinct	ATAC.similar
TraesCS1A02G236400	C6	Ortho.DEG	RNA.distinct	ATAC.distinct
TraesCS1A02G236500	C3	Ortho.DEG	RNA.distinct	ATAC.distinct
TraesCS1A02G237200	C6	Ortho.DEG	RNA.similar	ATAC.distinct
TraesCS1A02G238900	C3	Ortho.DEG	RNA.distinct	ATAC.distinct
TraesCS1A02G239700	C2	Ortho.DEG	RNA.distinct	ATAC.similar
TraesCS1A02G240300	C1	Ortho.DEG	RNA.distinct	ATAC.similar
TraesCS1A02G241000	C4	Ortho.DEG	RNA.distinct	ATAC.distinct
TraesCS1A02G241600	C6	Ortho.DEG	RNA.distinct	ATAC.distinct
TraesCS1A02G241700	C5	Ortho.DEG	RNA.similar	ATAC.similar
TraesCS1A02G241900	C4	Ortho.DEG	RNA.similar	ATAC.distinct
TraesCS1A02G242500	C1	Ortho.DEG	RNA.distinct	ATAC.similar
TraesCS1A02G244300	C6	Ortho.DEG	RNA.distinct	ATAC.distinct
TraesCS1A02G244700	C1	Ortho.DEG	RNA.similar	ATAC.similar
TraesCS1A02G244800	C1	Ortho.DEG	RNA.distinct	ATAC.distinct
TraesCS1A02G246500	C3	Ortho.DEG	RNA.distinct	ATAC.distinct
TraesCS1A02G247100	C3	Ortho.DEG	RNA.similar	ATAC.distinct
TraesCS1A02G247500	C1	Ortho.DEG	RNA.similar	ATAC.distinct
TraesCS1A02G249100	C2	Ortho.DEG	RNA.distinct	ATAC.distinct
TraesCS1A02G249600	C6	Ortho.DEG	RNA.distinct	ATAC.distinct
TraesCS1A02G250100	C1	Ortho.DEG	RNA.similar	ATAC.distinct
TraesCS1A02G250300	C5	Ortho.DEG	RNA.distinct	ATAC.distinct
TraesCS1A02G251000	C4	Ortho.DEG	RNA.distinct	ATAC.distinct
TraesCS1A02G251100	C6	Ortho.DEG	RNA.distinct	ATAC.distinct
TraesCS1A02G251400	C5	Ortho.DEG	RNA.similar	ATAC.distinct
TraesCS1A02G252500	C5	Ortho.DEG	RNA.distinct	ATAC.distinct
TraesCS1A02G253200	C2	Ortho.DEG	RNA.distinct	ATAC.distinct
TraesCS1A02G253400	C2	Ortho.DEG	RNA.distinct	ATAC.distinct
TraesCS1A02G254200	C3	Ortho.DEG	RNA.distinct	ATAC.distinct
TraesCS1A02G254400	C1	Ortho.DEG	RNA.similar	ATAC.distinct
TraesCS1A02G254800	C1	Ortho.DEG	RNA.distinct	ATAC.distinct
TraesCS1A02G255100	C4	Ortho.DEG	RNA.distinct	ATAC.similar
TraesCS1A02G255600	C1	Ortho.DEG	RNA.distinct	ATAC.distinct
TraesCS1A02G255800	C2	Ortho.DEG	RNA.distinct	ATAC.similar
TraesCS1A02G256100	C2	Ortho.DEG	RNA.distinct	ATAC.distinct
TraesCS1A02G256800	C2	Ortho.DEG	RNA.distinct	ATAC.distinct
TraesCS1A02G257200	C5	Ortho.DEG	RNA.distinct	ATAC.distinct
TraesCS1A02G257300	C1	Ortho.DEG	RNA.distinct	ATAC.distinct
TraesCS1A02G258400	C4	Ortho.DEG	RNA.distinct	ATAC.distinct
TraesCS1A02G259200	C1	Ortho.DEG	RNA.similar	ATAC.distinct
TraesCS1A02G259800	C1	Ortho.DEG	RNA.similar	ATAC.distinct
TraesCS1A02G260500	C2	Ortho.DEG	RNA.distinct	ATAC.distinct
TraesCS1A02G261400	C1	Ortho.DEG	RNA.similar	ATAC.distinct
TraesCS1A02G261600	C6	Ortho.DEG	RNA.similar	ATAC.distinct
TraesCS1A02G262100	C1	Ortho.DEG	RNA.similar	ATAC.distinct
TraesCS1A02G262800	C1	Ortho.DEG	RNA.similar	ATAC.distinct
TraesCS1A02G263100	C1	Ortho.DEG	RNA.similar	ATAC.distinct
TraesCS1A02G263300	C5	Ortho.DEG	RNA.distinct	ATAC.similar
TraesCS1A02G263700	C5	Ortho.DEG	RNA.distinct	ATAC.distinct
TraesCS1A02G264000	C2	Ortho.DEG	RNA.similar	ATAC.distinct
TraesCS1A02G264300	C3	Ortho.DEG	RNA.similar	ATAC.distinct
TraesCS1A02G264500	C1	Ortho.DEG	RNA.distinct	ATAC.distinct
TraesCS1A02G264800	C2	Ortho.DEG	RNA.distinct	ATAC.distinct
TraesCS1A02G264900	C3	Ortho.DEG	RNA.distinct	ATAC.similar
TraesCS1A02G265200	C1	Ortho.DEG	RNA.distinct	ATAC.similar
TraesCS1A02G266000	C5	Ortho.DEG	RNA.similar	ATAC.distinct
TraesCS1A02G266300	C6	Ortho.DEG	RNA.similar	ATAC.distinct
TraesCS1A02G266500	C5	Ortho.DEG	RNA.distinct	ATAC.distinct
TraesCS1A02G266600	C1	Ortho.DEG	RNA.similar	ATAC.distinct
TraesCS1A02G267800	C1	Ortho.DEG	RNA.distinct	ATAC.distinct
TraesCS1A02G268400	C5	Ortho.DEG	RNA.similar	ATAC.distinct
TraesCS1A02G268500	C1	Ortho.DEG	RNA.similar	ATAC.similar
TraesCS1A02G269000	C4	Ortho.DEG	RNA.similar	ATAC.distinct
TraesCS1A02G269200	C4	Ortho.DEG	RNA.similar	ATAC.distinct
TraesCS1A02G269300	C6	Ortho.DEG	RNA.similar	ATAC.distinct
TraesCS1A02G270300	C5	Ortho.DEG	RNA.distinct	ATAC.distinct
TraesCS1A02G270700	C1	Ortho.DEG	RNA.similar	ATAC.distinct
TraesCS1A02G270800	C1	Ortho.DEG	RNA.similar	ATAC.distinct
TraesCS1A02G271800	C1	Ortho.DEG	RNA.similar	ATAC.distinct
TraesCS1A02G272300	C5	Ortho.DEG	RNA.distinct	ATAC.similar
TraesCS1A02G273100	C1	Ortho.DEG	RNA.similar	ATAC.similar
TraesCS1A02G273500	C1	Ortho.DEG	RNA.distinct	ATAC.distinct
TraesCS1A02G273900	C6	Ortho.DEG	RNA.distinct	ATAC.distinct
TraesCS1A02G274800	C4	Ortho.DEG	RNA.distinct	ATAC.similar
TraesCS1A02G275200	C1	Ortho.DEG	RNA.similar	ATAC.distinct
TraesCS1A02G275800	C1	Ortho.DEG	RNA.distinct	ATAC.distinct
TraesCS1A02G277400	C1	Ortho.DEG	RNA.similar	ATAC.distinct
TraesCS1A02G278200	C1	Ortho.DEG	RNA.distinct	ATAC.distinct
TraesCS1A02G278300	C1	Ortho.DEG	RNA.similar	ATAC.distinct
TraesCS1A02G279000	C1	Ortho.DEG	RNA.similar	ATAC.distinct
TraesCS1A02G279200	C1	Ortho.DEG	RNA.distinct	ATAC.distinct
TraesCS1A02G279300	C6	Ortho.DEG	RNA.similar	ATAC.similar
TraesCS1A02G280400	C3	Ortho.DEG	RNA.distinct	ATAC.distinct
TraesCS1A02G281300	C6	Ortho.DEG	RNA.similar	ATAC.distinct
TraesCS1A02G282000	C5	Ortho.DEG	RNA.distinct	ATAC.similar
TraesCS1A02G282200	C3	Ortho.DEG	RNA.similar	ATAC.distinct
TraesCS1A02G282600	C3	Ortho.DEG	RNA.distinct	ATAC.similar
TraesCS1A02G282700	C5	Ortho.DEG	RNA.distinct	ATAC.distinct
TraesCS1A02G284300	C1	Ortho.DEG	RNA.distinct	ATAC.distinct
TraesCS1A02G285000	C1	Ortho.DEG	RNA.similar	ATAC.distinct
TraesCS1A02G286300	C5	Ortho.DEG	RNA.distinct	ATAC.similar
TraesCS1A02G287100	C6	Ortho.DEG	RNA.distinct	ATAC.distinct
TraesCS1A02G287500	C5	Ortho.DEG	RNA.similar	ATAC.distinct
TraesCS1A02G288300	C6	Ortho.DEG	RNA.distinct	ATAC.distinct
TraesCS1A02G292100	C6	Ortho.DEG	RNA.distinct	ATAC.distinct
TraesCS1A02G295300	C3	Ortho.DEG	RNA.distinct	ATAC.similar
TraesCS1A02G295600	C1	Ortho.DEG	RNA.distinct	ATAC.distinct
TraesCS1A02G295800	C1	Ortho.DEG	RNA.similar	ATAC.distinct
TraesCS1A02G297000	C6	Ortho.DEG	RNA.distinct	ATAC.distinct
TraesCS1A02G297400	C2	Ortho.DEG	RNA.distinct	ATAC.distinct
TraesCS1A02G297500	C5	Ortho.DEG	RNA.distinct	ATAC.distinct
TraesCS1A02G297800	C1	Ortho.DEG	RNA.similar	ATAC.similar
TraesCS1A02G298200	C1	Ortho.DEG	RNA.distinct	ATAC.distinct
TraesCS1A02G298600	C6	Ortho.DEG	RNA.distinct	ATAC.similar
TraesCS1A02G298700	C1	Ortho.DEG	RNA.similar	ATAC.distinct
TraesCS1A02G299100	C5	Ortho.DEG	RNA.distinct	ATAC.distinct
TraesCS1A02G299200	C5	Ortho.DEG	RNA.similar	ATAC.distinct
TraesCS1A02G299900	C6	Ortho.DEG	RNA.distinct	ATAC.distinct
TraesCS1A02G300000	C1	Ortho.DEG	RNA.similar	ATAC.similar
TraesCS1A02G300900	C1	Ortho.DEG	RNA.distinct	ATAC.distinct
TraesCS1A02G302700	C2	Ortho.DEG	RNA.similar	ATAC.distinct
TraesCS1A02G302800	C6	Ortho.DEG	RNA.distinct	ATAC.distinct
TraesCS1A02G303300	C2	Ortho.DEG	RNA.similar	ATAC.distinct
TraesCS1A02G303600	C4	Ortho.DEG	RNA.distinct	ATAC.distinct
TraesCS1A02G303800	C4	Ortho.DEG	RNA.distinct	ATAC.similar
TraesCS1A02G304200	C3	Ortho.DEG	RNA.distinct	ATAC.distinct
TraesCS1A02G305400	C5	Ortho.DEG	RNA.distinct	ATAC.distinct
TraesCS1A02G306300	C4	Ortho.DEG	RNA.distinct	ATAC.similar
TraesCS1A02G306400	C2	Ortho.DEG	RNA.distinct	ATAC.distinct
TraesCS1A02G306500	C3	Ortho.DEG	RNA.distinct	ATAC.similar
TraesCS1A02G307800	C1	Ortho.DEG	RNA.distinct	ATAC.distinct
TraesCS1A02G308100	C6	Ortho.DEG	RNA.distinct	ATAC.distinct
TraesCS1A02G308300	C1	Ortho.DEG	RNA.distinct	ATAC.distinct
TraesCS1A02G308900	C4	Ortho.DEG	RNA.distinct	ATAC.distinct
TraesCS1A02G309800	C2	Ortho.DEG	RNA.distinct	ATAC.distinct
TraesCS1A02G310200	C3	Ortho.DEG	RNA.similar	ATAC.distinct
TraesCS1A02G310500	C1	Ortho.DEG	RNA.distinct	ATAC.distinct
TraesCS1A02G311000	C5	Ortho.DEG	RNA.distinct	ATAC.distinct
TraesCS1A02G313900	C1	Ortho.DEG	RNA.similar	ATAC.distinct
TraesCS1A02G314100	C2	Ortho.DEG	RNA.distinct	ATAC.distinct
TraesCS1A02G314300	C1	Ortho.DEG	RNA.similar	ATAC.similar
TraesCS1A02G319600	C5	Ortho.DEG	RNA.distinct	ATAC.distinct
TraesCS1A02G320000	C1	Ortho.DEG	RNA.distinct	ATAC.distinct
TraesCS1A02G320300	C4	Ortho.DEG	RNA.distinct	ATAC.similar
TraesCS1A02G321000	C1	Ortho.DEG	RNA.similar	ATAC.distinct
TraesCS1A02G321900	C5	Ortho.DEG	RNA.distinct	ATAC.similar
TraesCS1A02G322300	C1	Ortho.DEG	RNA.distinct	ATAC.distinct
TraesCS1A02G322700	C6	Ortho.DEG	RNA.similar	ATAC.similar
TraesCS1A02G323400	C5	Ortho.DEG	RNA.distinct	ATAC.distinct
TraesCS1A02G323500	C2	Ortho.DEG	RNA.distinct	ATAC.distinct
TraesCS1A02G323900	C5	Ortho.DEG	RNA.distinct	ATAC.similar
TraesCS1A02G325400	C6	Ortho.DEG	RNA.distinct	ATAC.distinct
TraesCS1A02G325800	C6	Ortho.DEG	RNA.distinct	ATAC.distinct
TraesCS1A02G328700	C4	Ortho.DEG	RNA.distinct	ATAC.distinct
TraesCS1A02G329300	C4	Ortho.DEG	RNA.distinct	ATAC.distinct
TraesCS1A02G329600	C2	Ortho.DEG	RNA.distinct	ATAC.similar
TraesCS1A02G330100	C1	Ortho.DEG	RNA.similar	ATAC.distinct
TraesCS1A02G330300	C4	Ortho.DEG	RNA.distinct	ATAC.distinct
TraesCS1A02G330700	C6	Ortho.DEG	RNA.distinct	ATAC.distinct
TraesCS1A02G331100	C3	Ortho.DEG	RNA.distinct	ATAC.distinct
TraesCS1A02G332500	C5	Ortho.DEG	RNA.distinct	ATAC.similar
TraesCS1A02G332600	C1	Ortho.DEG	RNA.similar	ATAC.distinct
TraesCS1A02G333500	C6	Ortho.DEG	RNA.similar	ATAC.distinct
TraesCS1A02G333600	C3	Ortho.DEG	RNA.similar	ATAC.distinct
TraesCS1A02G334900	C1	Ortho.DEG	RNA.similar	ATAC.distinct
TraesCS1A02G338200	C1	Ortho.DEG	RNA.similar	ATAC.similar
TraesCS1A02G338300	C5	Ortho.DEG	RNA.distinct	ATAC.distinct
TraesCS1A02G339600	C1	Ortho.DEG	RNA.similar	ATAC.distinct
TraesCS1A02G339800	C6	Ortho.DEG	RNA.similar	ATAC.distinct
TraesCS1A02G340000	C6	Ortho.DEG	RNA.similar	ATAC.distinct
TraesCS1A02G341300	C1	Ortho.DEG	RNA.distinct	ATAC.distinct
TraesCS1A02G341500	C6	Ortho.DEG	RNA.distinct	ATAC.distinct
TraesCS1A02G342500	C5	Ortho.DEG	RNA.distinct	ATAC.distinct
TraesCS1A02G343000	C6	Ortho.DEG	RNA.distinct	ATAC.distinct
TraesCS1A02G343300	C6	Ortho.DEG	RNA.similar	ATAC.similar
TraesCS1A02G343800	C6	Ortho.DEG	RNA.similar	ATAC.distinct
TraesCS1A02G346500	C1	Ortho.DEG	RNA.distinct	ATAC.similar
TraesCS1A02G346800	C1	Ortho.DEG	RNA.similar	ATAC.similar
TraesCS1A02G346900	C1	Ortho.DEG	RNA.distinct	ATAC.distinct
TraesCS1A02G348300	C5	Ortho.DEG	RNA.distinct	ATAC.distinct
TraesCS1A02G348800	C6	Ortho.DEG	RNA.distinct	ATAC.distinct
TraesCS1A02G348900	C3	Ortho.DEG	RNA.similar	ATAC.distinct
TraesCS1A02G349000	C5	Ortho.DEG	RNA.distinct	ATAC.distinct
TraesCS1A02G350600	C5	Ortho.DEG	RNA.distinct	ATAC.similar
TraesCS1A02G350800	C5	Ortho.DEG	RNA.similar	ATAC.distinct
TraesCS1A02G351600	C1	Ortho.DEG	RNA.similar	ATAC.distinct
TraesCS1A02G351900	C5	Ortho.DEG	RNA.distinct	ATAC.distinct
TraesCS1A02G352000	C1	Ortho.DEG	RNA.similar	ATAC.distinct
TraesCS1A02G352800	C5	Ortho.DEG	RNA.distinct	ATAC.distinct
TraesCS1A02G353800	C5	Ortho.DEG	RNA.distinct	ATAC.distinct
TraesCS1A02G355500	C1	Ortho.DEG	RNA.similar	ATAC.distinct
TraesCS1A02G356200	C6	Ortho.DEG	RNA.similar	ATAC.distinct
TraesCS1A02G356900	C4	Ortho.DEG	RNA.distinct	ATAC.similar
TraesCS1A02G357300	C6	Ortho.DEG	RNA.distinct	ATAC.distinct
TraesCS1A02G357400	C4	Ortho.DEG	RNA.distinct	ATAC.distinct
TraesCS1A02G358000	C1	Ortho.DEG	RNA.similar	ATAC.distinct
TraesCS1A02G358400	C1	Ortho.DEG	RNA.distinct	ATAC.distinct
TraesCS1A02G358600	C1	Ortho.DEG	RNA.distinct	ATAC.distinct
TraesCS1A02G360700	C2	Ortho.DEG	RNA.distinct	ATAC.similar
TraesCS1A02G361000	C1	Ortho.DEG	RNA.similar	ATAC.distinct
TraesCS1A02G361600	C2	Ortho.DEG	RNA.distinct	ATAC.similar
TraesCS1A02G362400	C2	Ortho.DEG	RNA.similar	ATAC.similar
TraesCS1A02G362500	C5	Ortho.DEG	RNA.distinct	ATAC.distinct
TraesCS1A02G362800	C1	Ortho.DEG	RNA.distinct	ATAC.similar
TraesCS1A02G363100	C1	Ortho.DEG	RNA.similar	ATAC.distinct
TraesCS1A02G363200	C6	Ortho.DEG	RNA.distinct	ATAC.distinct
TraesCS1A02G363800	C5	Ortho.DEG	RNA.distinct	ATAC.distinct
TraesCS1A02G363900	C4	Ortho.DEG	RNA.similar	ATAC.distinct
TraesCS1A02G366400	C1	Ortho.DEG	RNA.similar	ATAC.distinct
TraesCS1A02G366500	C1	Ortho.DEG	RNA.similar	ATAC.distinct
TraesCS1A02G366700	C1	Ortho.DEG	RNA.similar	ATAC.distinct
TraesCS1A02G366900	C1	Ortho.DEG	RNA.similar	ATAC.similar
TraesCS1A02G367000	C1	Ortho.DEG	RNA.similar	ATAC.similar
TraesCS1A02G367100	C1	Ortho.DEG	RNA.similar	ATAC.similar
TraesCS1A02G367200	C1	Ortho.DEG	RNA.similar	ATAC.similar
TraesCS1A02G367900	C1	Ortho.DEG	RNA.distinct	ATAC.similar
TraesCS1A02G368000	C2	Ortho.DEG	RNA.distinct	ATAC.similar
TraesCS1A02G369600	C1	Ortho.DEG	RNA.distinct	ATAC.distinct
TraesCS1A02G369700	C1	Ortho.DEG	RNA.similar	ATAC.distinct
TraesCS1A02G370100	C3	Ortho.DEG	RNA.similar	ATAC.distinct
TraesCS1A02G371900	C5	Ortho.DEG	RNA.distinct	ATAC.distinct
TraesCS1A02G372300	C6	Ortho.DEG	RNA.distinct	ATAC.similar
TraesCS1A02G372400	C5	Ortho.DEG	RNA.distinct	ATAC.distinct
TraesCS1A02G373000	C5	Ortho.DEG	RNA.distinct	ATAC.distinct
TraesCS1A02G373200	C3	Ortho.DEG	RNA.distinct	ATAC.distinct
TraesCS1A02G373800	C5	Ortho.DEG	RNA.distinct	ATAC.distinct
TraesCS1A02G374600	C2	Ortho.DEG	RNA.distinct	ATAC.distinct
TraesCS1A02G375200	C4	Ortho.DEG	RNA.distinct	ATAC.distinct
TraesCS1A02G375600	C1	Ortho.DEG	RNA.similar	ATAC.distinct
TraesCS1A02G375800	C6	Ortho.DEG	RNA.distinct	ATAC.distinct
TraesCS1A02G376300	C1	Ortho.DEG	RNA.distinct	ATAC.similar
TraesCS1A02G378000	C5	Ortho.DEG	RNA.distinct	ATAC.distinct
TraesCS1A02G378200	C6	Ortho.DEG	RNA.distinct	ATAC.distinct
TraesCS1A02G378900	C1	Ortho.DEG	RNA.distinct	ATAC.distinct
TraesCS1A02G379000	C5	Ortho.DEG	RNA.distinct	ATAC.distinct
TraesCS1A02G379600	C6	Ortho.DEG	RNA.distinct	ATAC.distinct
TraesCS1A02G379900	C6	Ortho.DEG	RNA.similar	ATAC.distinct
TraesCS1A02G380900	C5	Ortho.DEG	RNA.similar	ATAC.similar
TraesCS1A02G381100	C5	Ortho.DEG	RNA.distinct	ATAC.distinct
TraesCS1A02G383500	C5	Ortho.DEG	RNA.distinct	ATAC.similar
TraesCS1A02G384000	C6	Ortho.DEG	RNA.distinct	ATAC.distinct
TraesCS1A02G386500	C5	Ortho.DEG	RNA.similar	ATAC.distinct
TraesCS1A02G386700	C3	Ortho.DEG	RNA.distinct	ATAC.distinct
TraesCS1A02G387100	C4	Ortho.DEG	RNA.similar	ATAC.distinct
TraesCS1A02G387400	C5	Ortho.DEG	RNA.similar	ATAC.distinct
TraesCS1A02G388600	C2	Ortho.DEG	RNA.distinct	ATAC.similar
TraesCS1A02G389100	C6	Ortho.DEG	RNA.similar	ATAC.distinct
TraesCS1A02G389300	C2	Ortho.DEG	RNA.distinct	ATAC.similar
TraesCS1A02G390200	C4	Ortho.DEG	RNA.distinct	ATAC.similar
TraesCS1A02G390300	C3	Ortho.DEG	RNA.distinct	ATAC.distinct
TraesCS1A02G390400	C1	Ortho.DEG	RNA.similar	ATAC.distinct
TraesCS1A02G391900	C5	Ortho.DEG	RNA.distinct	ATAC.distinct
TraesCS1A02G394400	C1	Ortho.DEG	RNA.distinct	ATAC.distinct
TraesCS1A02G394500	C4	Ortho.DEG	RNA.similar	ATAC.similar
TraesCS1A02G394600	C3	Ortho.DEG	RNA.distinct	ATAC.distinct
TraesCS1A02G395800	C3	Ortho.DEG	RNA.distinct	ATAC.distinct
TraesCS1A02G396700	C1	Ortho.DEG	RNA.similar	ATAC.similar
TraesCS1A02G396800	C1	Ortho.DEG	RNA.similar	ATAC.similar
TraesCS1A02G396900	C1	Ortho.DEG	RNA.similar	ATAC.distinct
TraesCS1A02G397200	C1	Ortho.DEG	RNA.similar	ATAC.distinct
TraesCS1A02G397500	C5	Ortho.DEG	RNA.distinct	ATAC.distinct
TraesCS1A02G398300	C1	Ortho.DEG	RNA.similar	ATAC.distinct
TraesCS1A02G399600	C3	Ortho.DEG	RNA.distinct	ATAC.distinct
TraesCS1A02G400200	C4	Ortho.DEG	RNA.distinct	ATAC.similar
TraesCS1A02G400600	C2	Ortho.DEG	RNA.distinct	ATAC.distinct
TraesCS1A02G401800	C5	Ortho.DEG	RNA.distinct	ATAC.distinct
TraesCS1A02G402100	C1	Ortho.DEG	RNA.similar	ATAC.distinct
TraesCS1A02G403000	C3	Ortho.DEG	RNA.distinct	ATAC.distinct
TraesCS1A02G403400	C5	Ortho.DEG	RNA.distinct	ATAC.distinct
TraesCS1A02G404500	C4	Ortho.DEG	RNA.distinct	ATAC.distinct
TraesCS1A02G405600	C4	Ortho.DEG	RNA.distinct	ATAC.distinct
TraesCS1A02G406200	C1	Ortho.DEG	RNA.distinct	ATAC.similar
TraesCS1A02G408800	C6	Ortho.DEG	RNA.distinct	ATAC.distinct
TraesCS1A02G408900	C1	Ortho.DEG	RNA.similar	ATAC.distinct
TraesCS1A02G409800	C5	Ortho.DEG	RNA.distinct	ATAC.distinct
TraesCS1A02G409900	C2	Ortho.DEG	RNA.distinct	ATAC.distinct
TraesCS1A02G410500	C1	Ortho.DEG	RNA.similar	ATAC.similar
TraesCS1A02G410700	C1	Ortho.DEG	RNA.similar	ATAC.distinct
TraesCS1A02G410800	C5	Ortho.DEG	RNA.distinct	ATAC.distinct
TraesCS1A02G411700	C1	Ortho.DEG	RNA.similar	ATAC.distinct
TraesCS1A02G412100	C4	Ortho.DEG	RNA.distinct	ATAC.distinct
TraesCS1A02G412900	C5	Ortho.DEG	RNA.distinct	ATAC.similar
TraesCS1A02G413000	C5	Ortho.DEG	RNA.distinct	ATAC.distinct
TraesCS1A02G413300	C3	Ortho.DEG	RNA.distinct	ATAC.distinct
TraesCS1A02G414300	C5	Ortho.DEG	RNA.distinct	ATAC.distinct
TraesCS1A02G414400	C1	Ortho.DEG	RNA.distinct	ATAC.distinct
TraesCS1A02G415800	C5	Ortho.DEG	RNA.distinct	ATAC.distinct
TraesCS1A02G416100	C1	Ortho.DEG	RNA.similar	ATAC.similar
TraesCS1A02G416200	C4	Ortho.DEG	RNA.distinct	ATAC.distinct
TraesCS1A02G416700	C1	Ortho.DEG	RNA.similar	ATAC.distinct
TraesCS1A02G417000	C2	Ortho.DEG	RNA.distinct	ATAC.similar
TraesCS1A02G417800	C1	Ortho.DEG	RNA.distinct	ATAC.distinct
TraesCS1A02G417900	C4	Ortho.DEG	RNA.distinct	ATAC.distinct
TraesCS1A02G418300	C5	Ortho.DEG	RNA.distinct	ATAC.distinct
TraesCS1A02G419800	C4	Ortho.DEG	RNA.similar	ATAC.distinct
TraesCS1A02G420000	C4	Ortho.DEG	RNA.similar	ATAC.distinct
TraesCS1A02G420700	C3	Ortho.DEG	RNA.distinct	ATAC.distinct
TraesCS1A02G420800	C5	Ortho.DEG	RNA.distinct	ATAC.distinct
TraesCS1A02G420900	C3	Ortho.DEG	RNA.similar	ATAC.similar
TraesCS1A02G421000	C2	Ortho.DEG	RNA.distinct	ATAC.distinct
TraesCS1A02G421900	C5	Ortho.DEG	RNA.distinct	ATAC.distinct
TraesCS1A02G423800	C5	Ortho.DEG	RNA.distinct	ATAC.distinct
TraesCS1A02G424100	C3	Ortho.DEG	RNA.distinct	ATAC.distinct
TraesCS1A02G424300	C3	Ortho.DEG	RNA.distinct	ATAC.distinct
TraesCS1A02G424500	C1	Ortho.DEG	RNA.similar	ATAC.similar
TraesCS1A02G425100	C1	Ortho.DEG	RNA.distinct	ATAC.distinct
TraesCS1A02G425200	C1	Ortho.DEG	RNA.similar	ATAC.distinct
TraesCS1A02G425400	C6	Ortho.DEG	RNA.distinct	ATAC.distinct
TraesCS1A02G427400	C1	Ortho.DEG	RNA.distinct	ATAC.similar
TraesCS1A02G428400	C5	Ortho.DEG	RNA.distinct	ATAC.distinct
TraesCS1A02G429800	C5	Ortho.DEG	RNA.distinct	ATAC.distinct
TraesCS1A02G430000	C5	Ortho.DEG	RNA.distinct	ATAC.distinct
TraesCS1A02G430200	C3	Ortho.DEG	RNA.distinct	ATAC.distinct
TraesCS1A02G433100	C1	Ortho.DEG	RNA.distinct	ATAC.distinct
TraesCS1A02G437400	C4	Ortho.DEG	RNA.distinct	ATAC.distinct
TraesCS1A02G437600	C1	Ortho.DEG	RNA.distinct	ATAC.similar
TraesCS1A02G440200	C5	Ortho.DEG	RNA.similar	ATAC.distinct
TraesCS1A02G441100	C6	Ortho.DEG	RNA.distinct	ATAC.distinct
TraesCS1A02G442100	C6	Ortho.DEG	RNA.distinct	ATAC.distinct
TraesCS1A02G442300	C5	Ortho.DEG	RNA.distinct	ATAC.distinct
TraesCS1A02G443900	C5	Ortho.DEG	RNA.distinct	ATAC.similar
TraesCS1A02G445600	C4	Ortho.DEG	RNA.similar	ATAC.distinct
TraesCS1B02G001800	C1	Ortho.DEG	RNA.distinct	ATAC.similar
TraesCS1B02G006400	C4	Ortho.DEG	RNA.distinct	ATAC.similar
TraesCS1B02G007200	C4	Ortho.DEG	RNA.distinct	ATAC.similar
TraesCS1B02G008000	C2	Ortho.DEG	RNA.distinct	ATAC.distinct
TraesCS1B02G008200	C1	Ortho.DEG	RNA.similar	ATAC.similar
TraesCS1B02G008600	C4	Ortho.DEG	RNA.distinct	ATAC.distinct
TraesCS1B02G009300	C4	Ortho.DEG	RNA.distinct	ATAC.distinct
TraesCS1B02G017800	C4	Ortho.DEG	RNA.similar	ATAC.similar
TraesCS1B02G019300	C6	Ortho.DEG	RNA.distinct	ATAC.distinct
TraesCS1B02G020300	C6	Ortho.DEG	RNA.distinct	ATAC.similar
TraesCS1B02G022800	C5	Ortho.DEG	RNA.distinct	ATAC.similar
TraesCS1B02G029000	C3	Ortho.DEG	RNA.distinct	ATAC.distinct
TraesCS1B02G029100	C1	Ortho.DEG	RNA.similar	ATAC.distinct
TraesCS1B02G031500	C6	Ortho.DEG	RNA.similar	ATAC.distinct
TraesCS1B02G033000	C4	Ortho.DEG	RNA.distinct	ATAC.similar
TraesCS1B02G033200	C6	Ortho.DEG	RNA.distinct	ATAC.distinct
TraesCS1B02G037000	C3	Ortho.DEG	RNA.similar	ATAC.similar
TraesCS1B02G037100	C1	Ortho.DEG	RNA.distinct	ATAC.distinct
TraesCS1B02G037600	C6	Ortho.DEG	RNA.similar	ATAC.distinct
TraesCS1B02G037700	C1	Ortho.DEG	RNA.distinct	ATAC.distinct
TraesCS1B02G038100	C3	Ortho.DEG	RNA.distinct	ATAC.distinct
TraesCS1B02G041400	C1	Ortho.DEG	RNA.similar	ATAC.distinct
TraesCS1B02G042000	C6	Ortho.DEG	RNA.distinct	ATAC.distinct
TraesCS1B02G042100	C1	Ortho.DEG	RNA.similar	ATAC.distinct
TraesCS1B02G042300	C1	Ortho.DEG	RNA.distinct	ATAC.distinct
TraesCS1B02G044800	C2	Ortho.DEG	RNA.distinct	ATAC.distinct
TraesCS1B02G045000	C1	Ortho.DEG	RNA.similar	ATAC.similar
TraesCS1B02G046300	C1	Ortho.DEG	RNA.similar	ATAC.distinct
TraesCS1B02G047400	C3	Ortho.DEG	RNA.similar	ATAC.distinct
TraesCS1B02G048300	C6	Ortho.DEG	RNA.distinct	ATAC.similar
TraesCS1B02G048500	C5	Ortho.DEG	RNA.similar	ATAC.distinct
TraesCS1B02G049200	C2	Ortho.DEG	RNA.distinct	ATAC.distinct
TraesCS1B02G049300	C2	Ortho.DEG	RNA.similar	ATAC.distinct
TraesCS1B02G050200	C4	Ortho.DEG	RNA.distinct	ATAC.distinct
TraesCS1B02G051700	C3	Ortho.DEG	RNA.similar	ATAC.distinct
TraesCS1B02G052100	C3	Ortho.DEG	RNA.distinct	ATAC.distinct
TraesCS1B02G053400	C6	Ortho.DEG	RNA.similar	ATAC.distinct
TraesCS1B02G053500	C5	Ortho.DEG	RNA.distinct	ATAC.distinct
TraesCS1B02G054900	C2	Ortho.DEG	RNA.similar	ATAC.distinct
TraesCS1B02G055200	C5	Ortho.DEG	RNA.distinct	ATAC.distinct
TraesCS1B02G055800	C4	Ortho.DEG	RNA.similar	ATAC.distinct
TraesCS1B02G055900	C3	Ortho.DEG	RNA.distinct	ATAC.distinct
TraesCS1B02G056000	C3	Ortho.DEG	RNA.similar	ATAC.similar
TraesCS1B02G057900	C4	Ortho.DEG	RNA.distinct	ATAC.distinct
TraesCS1B02G059100	C1	Ortho.DEG	RNA.similar	ATAC.similar
TraesCS1B02G059400	C4	Ortho.DEG	RNA.distinct	ATAC.similar
TraesCS1B02G061600	C6	Ortho.DEG	RNA.distinct	ATAC.distinct
TraesCS1B02G061700	C6	Ortho.DEG	RNA.distinct	ATAC.distinct
TraesCS1B02G064800	C4	Ortho.DEG	RNA.similar	ATAC.similar
TraesCS1B02G066400	C3	Ortho.DEG	RNA.distinct	ATAC.distinct
TraesCS1B02G068600	C5	Ortho.DEG	RNA.distinct	ATAC.distinct
TraesCS1B02G069200	C5	Ortho.DEG	RNA.distinct	ATAC.distinct
TraesCS1B02G071500	C2	Ortho.DEG	RNA.distinct	ATAC.distinct
TraesCS1B02G072000	C4	Ortho.DEG	RNA.distinct	ATAC.distinct
TraesCS1B02G072500	C5	Ortho.DEG	RNA.distinct	ATAC.distinct
TraesCS1B02G073700	C3	Ortho.DEG	RNA.distinct	ATAC.similar
TraesCS1B02G075900	C3	Ortho.DEG	RNA.similar	ATAC.similar
TraesCS1B02G076300	C3	Ortho.DEG	RNA.distinct	ATAC.similar
TraesCS1B02G076400	C6	Ortho.DEG	RNA.similar	ATAC.distinct
TraesCS1B02G077600	C3	Ortho.DEG	RNA.distinct	ATAC.distinct
TraesCS1B02G078800	C4	Ortho.DEG	RNA.distinct	ATAC.distinct
TraesCS1B02G079000	C4	Ortho.DEG	RNA.distinct	ATAC.distinct
TraesCS1B02G081900	C5	Ortho.DEG	RNA.distinct	ATAC.distinct
TraesCS1B02G082100	C6	Ortho.DEG	RNA.distinct	ATAC.distinct
TraesCS1B02G083400	C5	Ortho.DEG	RNA.distinct	ATAC.distinct
TraesCS1B02G083500	C5	Ortho.DEG	RNA.distinct	ATAC.distinct
TraesCS1B02G083800	C4	Ortho.DEG	RNA.similar	ATAC.distinct
TraesCS1B02G084500	C1	Ortho.DEG	RNA.distinct	ATAC.distinct
TraesCS1B02G085100	C6	Ortho.DEG	RNA.distinct	ATAC.distinct
TraesCS1B02G085500	C4	Ortho.DEG	RNA.similar	ATAC.distinct
TraesCS1B02G085600	C6	Ortho.DEG	RNA.distinct	ATAC.distinct
TraesCS1B02G086100	C5	Ortho.DEG	RNA.distinct	ATAC.similar
TraesCS1B02G088000	C6	Ortho.DEG	RNA.similar	ATAC.distinct
TraesCS1B02G088500	C6	Ortho.DEG	RNA.distinct	ATAC.distinct
TraesCS1B02G088600	C1	Ortho.DEG	RNA.similar	ATAC.distinct
TraesCS1B02G089000	C1	Ortho.DEG	RNA.similar	ATAC.distinct
TraesCS1B02G090400	C1	Ortho.DEG	RNA.distinct	ATAC.distinct
TraesCS1B02G091900	C5	Ortho.DEG	RNA.distinct	ATAC.distinct
TraesCS1B02G093600	C1	Ortho.DEG	RNA.distinct	ATAC.distinct
TraesCS1B02G095600	C5	Ortho.DEG	RNA.distinct	ATAC.distinct
TraesCS1B02G095900	C4	Ortho.DEG	RNA.similar	ATAC.distinct
TraesCS1B02G097300	C1	Ortho.DEG	RNA.distinct	ATAC.distinct
TraesCS1B02G097700	C1	Ortho.DEG	RNA.similar	ATAC.distinct
TraesCS1B02G098000	C1	Ortho.DEG	RNA.distinct	ATAC.similar
TraesCS1B02G098700	C3	Ortho.DEG	RNA.distinct	ATAC.distinct
TraesCS1B02G099000	C5	Ortho.DEG	RNA.similar	ATAC.similar
TraesCS1B02G100400	C1	Ortho.DEG	RNA.similar	ATAC.distinct
TraesCS1B02G101100	C1	Ortho.DEG	RNA.similar	ATAC.distinct
TraesCS1B02G101800	C5	Ortho.DEG	RNA.similar	ATAC.distinct
TraesCS1B02G103700	C5	Ortho.DEG	RNA.distinct	ATAC.similar
TraesCS1B02G104400	C6	Ortho.DEG	RNA.distinct	ATAC.distinct
TraesCS1B02G105000	C3	Ortho.DEG	RNA.similar	ATAC.distinct
TraesCS1B02G105100	C4	Ortho.DEG	RNA.distinct	ATAC.distinct
TraesCS1B02G105200	C1	Ortho.DEG	RNA.similar	ATAC.distinct
TraesCS1B02G107600	C3	Ortho.DEG	RNA.similar	ATAC.similar
TraesCS1B02G107800	C6	Ortho.DEG	RNA.distinct	ATAC.distinct
TraesCS1B02G108100	C6	Ortho.DEG	RNA.similar	ATAC.distinct
TraesCS1B02G108200	C1	Ortho.DEG	RNA.distinct	ATAC.distinct
TraesCS1B02G108900	C3	Ortho.DEG	RNA.similar	ATAC.distinct
TraesCS1B02G109000	C6	Ortho.DEG	RNA.similar	ATAC.distinct
TraesCS1B02G109400	C1	Ortho.DEG	RNA.similar	ATAC.distinct
TraesCS1B02G110600	C6	Ortho.DEG	RNA.distinct	ATAC.distinct
TraesCS1B02G112700	C3	Ortho.DEG	RNA.distinct	ATAC.distinct
TraesCS1B02G113400	C6	Ortho.DEG	RNA.similar	ATAC.distinct
TraesCS1B02G114500	C4	Ortho.DEG	RNA.similar	ATAC.distinct
TraesCS1B02G115200	C6	Ortho.DEG	RNA.similar	ATAC.distinct
TraesCS1B02G115300	C1	Ortho.DEG	RNA.similar	ATAC.distinct
TraesCS1B02G116100	C6	Ortho.DEG	RNA.similar	ATAC.distinct
TraesCS1B02G118300	C2	Ortho.DEG	RNA.similar	ATAC.distinct
TraesCS1B02G119100	C4	Ortho.DEG	RNA.similar	ATAC.similar
TraesCS1B02G119300	C1	Ortho.DEG	RNA.distinct	ATAC.distinct
TraesCS1B02G120000	C5	Ortho.DEG	RNA.similar	ATAC.distinct
TraesCS1B02G121200	C1	Ortho.DEG	RNA.similar	ATAC.distinct
TraesCS1B02G122100	C6	Ortho.DEG	RNA.distinct	ATAC.distinct
TraesCS1B02G122300	C5	Ortho.DEG	RNA.distinct	ATAC.similar
TraesCS1B02G122800	C1	Ortho.DEG	RNA.distinct	ATAC.similar
TraesCS1B02G124100	C1	Ortho.DEG	RNA.similar	ATAC.distinct
TraesCS1B02G124200	C4	Ortho.DEG	RNA.distinct	ATAC.distinct
TraesCS1B02G124900	C1	Ortho.DEG	RNA.distinct	ATAC.distinct
TraesCS1B02G125100	C6	Ortho.DEG	RNA.similar	ATAC.distinct
TraesCS1B02G125400	C1	Ortho.DEG	RNA.similar	ATAC.distinct
TraesCS1B02G126100	C5	Ortho.DEG	RNA.similar	ATAC.distinct
TraesCS1B02G126700	C5	Ortho.DEG	RNA.distinct	ATAC.distinct
TraesCS1B02G127900	C3	Ortho.DEG	RNA.distinct	ATAC.distinct
TraesCS1B02G128100	C1	Ortho.DEG	RNA.similar	ATAC.distinct
TraesCS1B02G128500	C3	Ortho.DEG	RNA.distinct	ATAC.similar
TraesCS1B02G128600	C5	Ortho.DEG	RNA.distinct	ATAC.similar
TraesCS1B02G128800	C5	Ortho.DEG	RNA.distinct	ATAC.distinct
TraesCS1B02G129000	C6	Ortho.DEG	RNA.distinct	ATAC.similar
TraesCS1B02G130000	C3	Ortho.DEG	RNA.distinct	ATAC.distinct
TraesCS1B02G130300	C1	Ortho.DEG	RNA.similar	ATAC.distinct
TraesCS1B02G130800	C4	Ortho.DEG	RNA.similar	ATAC.distinct
TraesCS1B02G131900	C3	Ortho.DEG	RNA.similar	ATAC.similar
TraesCS1B02G132400	C2	Ortho.DEG	RNA.similar	ATAC.distinct
TraesCS1B02G132500	C2	Ortho.DEG	RNA.similar	ATAC.distinct
TraesCS1B02G132900	C3	Ortho.DEG	RNA.distinct	ATAC.distinct
TraesCS1B02G133900	C1	Ortho.DEG	RNA.distinct	ATAC.distinct
TraesCS1B02G134600	C4	Ortho.DEG	RNA.similar	ATAC.similar
TraesCS1B02G135400	C5	Ortho.DEG	RNA.distinct	ATAC.similar
TraesCS1B02G135700	C5	Ortho.DEG	RNA.distinct	ATAC.distinct
TraesCS1B02G135900	C3	Ortho.DEG	RNA.similar	ATAC.distinct
TraesCS1B02G136000	C2	Ortho.DEG	RNA.distinct	ATAC.distinct
TraesCS1B02G137100	C1	Ortho.DEG	RNA.distinct	ATAC.distinct
TraesCS1B02G137300	C1	Ortho.DEG	RNA.distinct	ATAC.distinct
TraesCS1B02G138100	C5	Ortho.DEG	RNA.distinct	ATAC.distinct
TraesCS1B02G138600	C1	Ortho.DEG	RNA.distinct	ATAC.distinct
TraesCS1B02G138700	C2	Ortho.DEG	RNA.similar	ATAC.similar
TraesCS1B02G138800	C1	Ortho.DEG	RNA.similar	ATAC.distinct
TraesCS1B02G139000	C6	Ortho.DEG	RNA.distinct	ATAC.distinct
TraesCS1B02G139500	C1	Ortho.DEG	RNA.distinct	ATAC.distinct
TraesCS1B02G139600	C1	Ortho.DEG	RNA.distinct	ATAC.distinct
TraesCS1B02G140100	C2	Ortho.DEG	RNA.similar	ATAC.distinct
TraesCS1B02G140700	C5	Ortho.DEG	RNA.distinct	ATAC.distinct
TraesCS1B02G142000	C3	Ortho.DEG	RNA.distinct	ATAC.distinct
TraesCS1B02G142100	C4	Ortho.DEG	RNA.similar	ATAC.similar
TraesCS1B02G142300	C3	Ortho.DEG	RNA.distinct	ATAC.distinct
TraesCS1B02G143000	C3	Ortho.DEG	RNA.distinct	ATAC.distinct
TraesCS1B02G143500	C6	Ortho.DEG	RNA.similar	ATAC.distinct
TraesCS1B02G143800	C3	Ortho.DEG	RNA.distinct	ATAC.similar
TraesCS1B02G144500	C2	Ortho.DEG	RNA.similar	ATAC.similar
TraesCS1B02G144700	C1	Ortho.DEG	RNA.similar	ATAC.distinct
TraesCS1B02G145500	C6	Ortho.DEG	RNA.distinct	ATAC.distinct
TraesCS1B02G145800	C4	Ortho.DEG	RNA.distinct	ATAC.similar
TraesCS1B02G146100	C5	Ortho.DEG	RNA.distinct	ATAC.distinct
TraesCS1B02G146900	C2	Ortho.DEG	RNA.distinct	ATAC.distinct
TraesCS1B02G147000	C5	Ortho.DEG	RNA.similar	ATAC.distinct
TraesCS1B02G147100	C6	Ortho.DEG	RNA.similar	ATAC.distinct
TraesCS1B02G147700	C5	Ortho.DEG	RNA.similar	ATAC.similar
TraesCS1B02G149700	C2	Ortho.DEG	RNA.similar	ATAC.distinct
TraesCS1B02G150000	C6	Ortho.DEG	RNA.distinct	ATAC.distinct
TraesCS1B02G150100	C2	Ortho.DEG	RNA.distinct	ATAC.distinct
TraesCS1B02G150500	C6	Ortho.DEG	RNA.similar	ATAC.distinct
TraesCS1B02G151500	C5	Ortho.DEG	RNA.distinct	ATAC.distinct
TraesCS1B02G151900	C6	Ortho.DEG	RNA.distinct	ATAC.distinct
TraesCS1B02G153000	C3	Ortho.DEG	RNA.similar	ATAC.distinct
TraesCS1B02G154500	C2	Ortho.DEG	RNA.distinct	ATAC.similar
TraesCS1B02G155000	C4	Ortho.DEG	RNA.similar	ATAC.distinct
TraesCS1B02G155300	C3	Ortho.DEG	RNA.similar	ATAC.distinct
TraesCS1B02G156600	C2	Ortho.DEG	RNA.distinct	ATAC.distinct
TraesCS1B02G157000	C1	Ortho.DEG	RNA.similar	ATAC.distinct
TraesCS1B02G157500	C2	Ortho.DEG	RNA.distinct	ATAC.distinct
TraesCS1B02G157700	C3	Ortho.DEG	RNA.distinct	ATAC.distinct
TraesCS1B02G158500	C3	Ortho.DEG	RNA.distinct	ATAC.distinct
TraesCS1B02G158600	C3	Ortho.DEG	RNA.distinct	ATAC.distinct
TraesCS1B02G158900	C5	Ortho.DEG	RNA.distinct	ATAC.distinct
TraesCS1B02G159800	C1	Ortho.DEG	RNA.similar	ATAC.distinct
TraesCS1B02G159900	C3	Ortho.DEG	RNA.distinct	ATAC.distinct
TraesCS1B02G161000	C5	Ortho.DEG	RNA.similar	ATAC.distinct
TraesCS1B02G161300	C1	Ortho.DEG	RNA.distinct	ATAC.distinct
TraesCS1B02G162300	C5	Ortho.DEG	RNA.distinct	ATAC.similar
TraesCS1B02G162400	C2	Ortho.DEG	RNA.similar	ATAC.distinct
TraesCS1B02G164000	C6	Ortho.DEG	RNA.distinct	ATAC.distinct
TraesCS1B02G164900	C6	Ortho.DEG	RNA.similar	ATAC.distinct
TraesCS1B02G165500	C1	Ortho.DEG	RNA.distinct	ATAC.distinct
TraesCS1B02G165700	C6	Ortho.DEG	RNA.distinct	ATAC.distinct
TraesCS1B02G168100	C6	Ortho.DEG	RNA.distinct	ATAC.similar
TraesCS1B02G168800	C6	Ortho.DEG	RNA.distinct	ATAC.distinct
TraesCS1B02G168900	C4	Ortho.DEG	RNA.distinct	ATAC.similar
TraesCS1B02G169100	C4	Ortho.DEG	RNA.distinct	ATAC.distinct
TraesCS1B02G169500	C1	Ortho.DEG	RNA.similar	ATAC.similar
TraesCS1B02G170300	C6	Ortho.DEG	RNA.similar	ATAC.distinct
TraesCS1B02G171400	C1	Ortho.DEG	RNA.similar	ATAC.distinct
TraesCS1B02G171800	C1	Ortho.DEG	RNA.similar	ATAC.similar
TraesCS1B02G172100	C1	Ortho.DEG	RNA.distinct	ATAC.distinct
TraesCS1B02G173100	C6	Ortho.DEG	RNA.similar	ATAC.distinct
TraesCS1B02G173200	C5	Ortho.DEG	RNA.distinct	ATAC.similar
TraesCS1B02G173400	C5	Ortho.DEG	RNA.similar	ATAC.distinct
TraesCS1B02G173600	C5	Ortho.DEG	RNA.distinct	ATAC.distinct
TraesCS1B02G173700	C2	Ortho.DEG	RNA.similar	ATAC.similar
TraesCS1B02G174000	C3	Ortho.DEG	RNA.similar	ATAC.distinct
TraesCS1B02G174400	C4	Ortho.DEG	RNA.distinct	ATAC.distinct
TraesCS1B02G174500	C6	Ortho.DEG	RNA.similar	ATAC.distinct
TraesCS1B02G176500	C4	Ortho.DEG	RNA.distinct	ATAC.distinct
TraesCS1B02G176600	C4	Ortho.DEG	RNA.similar	ATAC.distinct
TraesCS1B02G178100	C3	Ortho.DEG	RNA.distinct	ATAC.distinct
TraesCS1B02G178500	C1	Ortho.DEG	RNA.similar	ATAC.distinct
TraesCS1B02G178800	C6	Ortho.DEG	RNA.similar	ATAC.distinct
TraesCS1B02G180700	C3	Ortho.DEG	RNA.similar	ATAC.distinct
TraesCS1B02G180900	C1	Ortho.DEG	RNA.similar	ATAC.distinct
TraesCS1B02G181800	C3	Ortho.DEG	RNA.distinct	ATAC.distinct
TraesCS1B02G182200	C1	Ortho.DEG	RNA.similar	ATAC.distinct
TraesCS1B02G183500	C1	Ortho.DEG	RNA.distinct	ATAC.distinct
TraesCS1B02G184000	C3	Ortho.DEG	RNA.distinct	ATAC.distinct
TraesCS1B02G184500	C5	Ortho.DEG	RNA.similar	ATAC.distinct
TraesCS1B02G185100	C6	Ortho.DEG	RNA.distinct	ATAC.distinct
TraesCS1B02G185600	C5	Ortho.DEG	RNA.similar	ATAC.distinct
TraesCS1B02G186100	C4	Ortho.DEG	RNA.similar	ATAC.distinct
TraesCS1B02G186300	C1	Ortho.DEG	RNA.similar	ATAC.similar
TraesCS1B02G186400	C5	Ortho.DEG	RNA.distinct	ATAC.distinct
TraesCS1B02G186500	C5	Ortho.DEG	RNA.distinct	ATAC.distinct
TraesCS1B02G186700	C1	Ortho.DEG	RNA.similar	ATAC.distinct
TraesCS1B02G186800	C2	Ortho.DEG	RNA.distinct	ATAC.distinct
TraesCS1B02G187200	C1	Ortho.DEG	RNA.similar	ATAC.distinct
TraesCS1B02G187400	C5	Ortho.DEG	RNA.distinct	ATAC.distinct
TraesCS1B02G187500	C4	Ortho.DEG	RNA.distinct	ATAC.distinct
TraesCS1B02G188300	C1	Ortho.DEG	RNA.similar	ATAC.distinct
TraesCS1B02G188400	C1	Ortho.DEG	RNA.distinct	ATAC.distinct
TraesCS1B02G189800	C6	Ortho.DEG	RNA.distinct	ATAC.distinct
TraesCS1B02G190900	C1	Ortho.DEG	RNA.similar	ATAC.distinct
TraesCS1B02G191000	C4	Ortho.DEG	RNA.distinct	ATAC.distinct
TraesCS1B02G191200	C3	Ortho.DEG	RNA.similar	ATAC.distinct
TraesCS1B02G192100	C3	Ortho.DEG	RNA.similar	ATAC.distinct
TraesCS1B02G192200	C5	Ortho.DEG	RNA.similar	ATAC.similar
TraesCS1B02G192500	C1	Ortho.DEG	RNA.distinct	ATAC.distinct
TraesCS1B02G192700	C1	Ortho.DEG	RNA.distinct	ATAC.distinct
TraesCS1B02G193700	C3	Ortho.DEG	RNA.similar	ATAC.distinct
TraesCS1B02G194900	C5	Ortho.DEG	RNA.distinct	ATAC.distinct
TraesCS1B02G196200	C4	Ortho.DEG	RNA.similar	ATAC.distinct
TraesCS1B02G196400	C1	Ortho.DEG	RNA.distinct	ATAC.similar
TraesCS1B02G196500	C4	Ortho.DEG	RNA.distinct	ATAC.distinct
TraesCS1B02G196600	C1	Ortho.DEG	RNA.similar	ATAC.similar
TraesCS1B02G196700	C4	Ortho.DEG	RNA.distinct	ATAC.distinct
TraesCS1B02G197200	C5	Ortho.DEG	RNA.distinct	ATAC.distinct
TraesCS1B02G197300	C6	Ortho.DEG	RNA.similar	ATAC.distinct
TraesCS1B02G197400	C3	Ortho.DEG	RNA.similar	ATAC.distinct
TraesCS1B02G197900	C5	Ortho.DEG	RNA.distinct	ATAC.distinct
TraesCS1B02G198500	C5	Ortho.DEG	RNA.distinct	ATAC.distinct
TraesCS1B02G198700	C1	Ortho.DEG	RNA.distinct	ATAC.distinct
TraesCS1B02G199600	C1	Ortho.DEG	RNA.similar	ATAC.distinct
TraesCS1B02G201000	C1	Ortho.DEG	RNA.similar	ATAC.similar
TraesCS1B02G201800	C1	Ortho.DEG	RNA.distinct	ATAC.distinct
TraesCS1B02G202100	C6	Ortho.DEG	RNA.distinct	ATAC.distinct
TraesCS1B02G202400	C5	Ortho.DEG	RNA.distinct	ATAC.distinct
TraesCS1B02G202800	C4	Ortho.DEG	RNA.distinct	ATAC.distinct
TraesCS1B02G203200	C3	Ortho.DEG	RNA.distinct	ATAC.distinct
TraesCS1B02G203300	C5	Ortho.DEG	RNA.distinct	ATAC.similar
TraesCS1B02G204800	C6	Ortho.DEG	RNA.similar	ATAC.distinct
TraesCS1B02G206100	C4	Ortho.DEG	RNA.similar	ATAC.similar
TraesCS1B02G206600	C6	Ortho.DEG	RNA.distinct	ATAC.similar
TraesCS1B02G206700	C3	Ortho.DEG	RNA.distinct	ATAC.distinct
TraesCS1B02G207000	C6	Ortho.DEG	RNA.distinct	ATAC.distinct
TraesCS1B02G207700	C1	Ortho.DEG	RNA.similar	ATAC.distinct
TraesCS1B02G208000	C1	Ortho.DEG	RNA.similar	ATAC.distinct
TraesCS1B02G208400	C1	Ortho.DEG	RNA.distinct	ATAC.distinct
TraesCS1B02G209000	C5	Ortho.DEG	RNA.distinct	ATAC.distinct
TraesCS1B02G209200	C1	Ortho.DEG	RNA.distinct	ATAC.distinct
TraesCS1B02G210500	C3	Ortho.DEG	RNA.distinct	ATAC.distinct
TraesCS1B02G211000	C5	Ortho.DEG	RNA.distinct	ATAC.distinct
TraesCS1B02G211400	C2	Ortho.DEG	RNA.distinct	ATAC.distinct
TraesCS1B02G212900	C6	Ortho.DEG	RNA.similar	ATAC.distinct
TraesCS1B02G213100	C3	Ortho.DEG	RNA.distinct	ATAC.distinct
TraesCS1B02G213400	C1	Ortho.DEG	RNA.similar	ATAC.distinct
TraesCS1B02G213600	C1	Ortho.DEG	RNA.distinct	ATAC.distinct
TraesCS1B02G213800	C3	Ortho.DEG	RNA.distinct	ATAC.distinct
TraesCS1B02G215200	C1	Ortho.DEG	RNA.similar	ATAC.similar
TraesCS1B02G215800	C5	Ortho.DEG	RNA.distinct	ATAC.distinct
TraesCS1B02G216000	C3	Ortho.DEG	RNA.distinct	ATAC.distinct
TraesCS1B02G216300	C6	Ortho.DEG	RNA.distinct	ATAC.similar
TraesCS1B02G217100	C6	Ortho.DEG	RNA.distinct	ATAC.similar
TraesCS1B02G217200	C1	Ortho.DEG	RNA.similar	ATAC.similar
TraesCS1B02G217800	C1	Ortho.DEG	RNA.distinct	ATAC.distinct
TraesCS1B02G218700	C1	Ortho.DEG	RNA.similar	ATAC.similar
TraesCS1B02G219200	C5	Ortho.DEG	RNA.distinct	ATAC.distinct
TraesCS1B02G219400	C3	Ortho.DEG	RNA.similar	ATAC.distinct
TraesCS1B02G219700	C5	Ortho.DEG	RNA.distinct	ATAC.distinct
TraesCS1B02G221200	C2	Ortho.DEG	RNA.distinct	ATAC.distinct
TraesCS1B02G222500	C4	Ortho.DEG	RNA.distinct	ATAC.distinct
TraesCS1B02G222600	C6	Ortho.DEG	RNA.similar	ATAC.distinct
TraesCS1B02G223200	C3	Ortho.DEG	RNA.similar	ATAC.distinct
TraesCS1B02G223300	C1	Ortho.DEG	RNA.similar	ATAC.similar
TraesCS1B02G223400	C4	Ortho.DEG	RNA.distinct	ATAC.similar
TraesCS1B02G224300	C5	Ortho.DEG	RNA.distinct	ATAC.distinct
TraesCS1B02G224600	C5	Ortho.DEG	RNA.similar	ATAC.distinct
TraesCS1B02G224700	C4	Ortho.DEG	RNA.distinct	ATAC.distinct
TraesCS1B02G224800	C2	Ortho.DEG	RNA.distinct	ATAC.similar
TraesCS1B02G225300	C1	Ortho.DEG	RNA.similar	ATAC.distinct
TraesCS1B02G225700	C3	Ortho.DEG	RNA.distinct	ATAC.similar
TraesCS1B02G225800	C3	Ortho.DEG	RNA.distinct	ATAC.distinct
TraesCS1B02G225900	C3	Ortho.DEG	RNA.distinct	ATAC.similar
TraesCS1B02G226000	C3	Ortho.DEG	RNA.distinct	ATAC.distinct
TraesCS1B02G226100	C3	Ortho.DEG	RNA.distinct	ATAC.distinct
TraesCS1B02G226500	C5	Ortho.DEG	RNA.distinct	ATAC.distinct
TraesCS1B02G227600	C6	Ortho.DEG	RNA.similar	ATAC.distinct
TraesCS1B02G228500	C1	Ortho.DEG	RNA.distinct	ATAC.distinct
TraesCS1B02G229000	C1	Ortho.DEG	RNA.similar	ATAC.distinct
TraesCS1B02G229100	C1	Ortho.DEG	RNA.similar	ATAC.distinct
TraesCS1B02G229300	C6	Ortho.DEG	RNA.similar	ATAC.similar
TraesCS1B02G229500	C4	Ortho.DEG	RNA.distinct	ATAC.distinct
TraesCS1B02G230900	C1	Ortho.DEG	RNA.similar	ATAC.distinct
TraesCS1B02G231500	C1	Ortho.DEG	RNA.similar	ATAC.similar
TraesCS1B02G232100	C1	Ortho.DEG	RNA.distinct	ATAC.distinct
TraesCS1B02G232400	C3	Ortho.DEG	RNA.distinct	ATAC.distinct
TraesCS1B02G232700	C4	Ortho.DEG	RNA.similar	ATAC.similar
TraesCS1B02G232800	C4	Ortho.DEG	RNA.distinct	ATAC.distinct
TraesCS1B02G233300	C1	Ortho.DEG	RNA.similar	ATAC.similar
TraesCS1B02G234000	C3	Ortho.DEG	RNA.distinct	ATAC.distinct
TraesCS1B02G234200	C4	Ortho.DEG	RNA.similar	ATAC.distinct
TraesCS1B02G235100	C1	Ortho.DEG	RNA.similar	ATAC.distinct
TraesCS1B02G235600	C3	Ortho.DEG	RNA.similar	ATAC.distinct
TraesCS1B02G235800	C4	Ortho.DEG	RNA.distinct	ATAC.distinct
TraesCS1B02G236600	C1	Ortho.DEG	RNA.distinct	ATAC.similar
TraesCS1B02G237100	C5	Ortho.DEG	RNA.similar	ATAC.similar
TraesCS1B02G238300	C2	Ortho.DEG	RNA.distinct	ATAC.similar
TraesCS1B02G238600	C5	Ortho.DEG	RNA.similar	ATAC.distinct
TraesCS1B02G239000	C6	Ortho.DEG	RNA.similar	ATAC.distinct
TraesCS1B02G240200	C6	Ortho.DEG	RNA.similar	ATAC.distinct
TraesCS1B02G240900	C6	Ortho.DEG	RNA.distinct	ATAC.distinct
TraesCS1B02G242000	C2	Ortho.DEG	RNA.similar	ATAC.distinct
TraesCS1B02G242200	C5	Ortho.DEG	RNA.distinct	ATAC.distinct
TraesCS1B02G242300	C1	Ortho.DEG	RNA.similar	ATAC.distinct
TraesCS1B02G242400	C1	Ortho.DEG	RNA.similar	ATAC.distinct
TraesCS1B02G243700	C1	Ortho.DEG	RNA.distinct	ATAC.distinct
TraesCS1B02G243800	C1	Ortho.DEG	RNA.distinct	ATAC.distinct
TraesCS1B02G243900	C1	Ortho.DEG	RNA.similar	ATAC.distinct
TraesCS1B02G244900	C1	Ortho.DEG	RNA.similar	ATAC.similar
TraesCS1B02G245300	C1	Ortho.DEG	RNA.similar	ATAC.distinct
TraesCS1B02G245500	C1	Ortho.DEG	RNA.similar	ATAC.distinct
TraesCS1B02G247800	C1	Ortho.DEG	RNA.similar	ATAC.similar
TraesCS1B02G248400	C5	Ortho.DEG	RNA.similar	ATAC.distinct
TraesCS1B02G249400	C2	Ortho.DEG	RNA.distinct	ATAC.distinct
TraesCS1B02G249700	C5	Ortho.DEG	RNA.distinct	ATAC.distinct
TraesCS1B02G250000	C5	Ortho.DEG	RNA.similar	ATAC.similar
TraesCS1B02G251000	C2	Ortho.DEG	RNA.distinct	ATAC.distinct
TraesCS1B02G252400	C1	Ortho.DEG	RNA.distinct	ATAC.distinct
TraesCS1B02G252900	C1	Ortho.DEG	RNA.similar	ATAC.distinct
TraesCS1B02G253400	C5	Ortho.DEG	RNA.similar	ATAC.similar
TraesCS1B02G253500	C4	Ortho.DEG	RNA.similar	ATAC.distinct
TraesCS1B02G253900	C1	Ortho.DEG	RNA.distinct	ATAC.similar
TraesCS1B02G254000	C1	Ortho.DEG	RNA.distinct	ATAC.distinct
TraesCS1B02G255000	C4	Ortho.DEG	RNA.distinct	ATAC.distinct
TraesCS1B02G255500	C6	Ortho.DEG	RNA.similar	ATAC.distinct
TraesCS1B02G255700	C1	Ortho.DEG	RNA.distinct	ATAC.distinct
TraesCS1B02G256000	C2	Ortho.DEG	RNA.distinct	ATAC.distinct
TraesCS1B02G258100	C1	Ortho.DEG	RNA.distinct	ATAC.distinct
TraesCS1B02G258900	C1	Ortho.DEG	RNA.similar	ATAC.similar
TraesCS1B02G259800	C2	Ortho.DEG	RNA.distinct	ATAC.distinct
TraesCS1B02G260100	C4	Ortho.DEG	RNA.distinct	ATAC.distinct
TraesCS1B02G260400	C6	Ortho.DEG	RNA.distinct	ATAC.distinct
TraesCS1B02G260500	C6	Ortho.DEG	RNA.similar	ATAC.distinct
TraesCS1B02G260800	C1	Ortho.DEG	RNA.similar	ATAC.distinct
TraesCS1B02G260900	C5	Ortho.DEG	RNA.distinct	ATAC.distinct
TraesCS1B02G261600	C4	Ortho.DEG	RNA.distinct	ATAC.distinct
TraesCS1B02G262000	C5	Ortho.DEG	RNA.distinct	ATAC.distinct
TraesCS1B02G263500	C2	Ortho.DEG	RNA.distinct	ATAC.distinct
TraesCS1B02G263900	C1	Ortho.DEG	RNA.similar	ATAC.distinct
TraesCS1B02G264000	C3	Ortho.DEG	RNA.distinct	ATAC.distinct
TraesCS1B02G264900	C1	Ortho.DEG	RNA.similar	ATAC.distinct
TraesCS1B02G265500	C6	Ortho.DEG	RNA.similar	ATAC.distinct
TraesCS1B02G265900	C4	Ortho.DEG	RNA.similar	ATAC.similar
TraesCS1B02G266500	C1	Ortho.DEG	RNA.similar	ATAC.distinct
TraesCS1B02G266800	C3	Ortho.DEG	RNA.distinct	ATAC.distinct
TraesCS1B02G267200	C1	Ortho.DEG	RNA.distinct	ATAC.distinct
TraesCS1B02G267700	C5	Ortho.DEG	RNA.distinct	ATAC.distinct
TraesCS1B02G267800	C3	Ortho.DEG	RNA.distinct	ATAC.distinct
TraesCS1B02G268900	C4	Ortho.DEG	RNA.distinct	ATAC.distinct
TraesCS1B02G269500	C5	Ortho.DEG	RNA.distinct	ATAC.similar
TraesCS1B02G269600	C1	Ortho.DEG	RNA.similar	ATAC.distinct
TraesCS1B02G270100	C1	Ortho.DEG	RNA.similar	ATAC.distinct
TraesCS1B02G270700	C5	Ortho.DEG	RNA.distinct	ATAC.distinct
TraesCS1B02G271100	C2	Ortho.DEG	RNA.distinct	ATAC.distinct
TraesCS1B02G272100	C5	Ortho.DEG	RNA.distinct	ATAC.distinct
TraesCS1B02G272200	C1	Ortho.DEG	RNA.similar	ATAC.similar
TraesCS1B02G272700	C1	Ortho.DEG	RNA.similar	ATAC.distinct
TraesCS1B02G273000	C6	Ortho.DEG	RNA.similar	ATAC.distinct
TraesCS1B02G273400	C5	Ortho.DEG	RNA.distinct	ATAC.distinct
TraesCS1B02G273700	C1	Ortho.DEG	RNA.similar	ATAC.distinct
TraesCS1B02G273900	C5	Ortho.DEG	RNA.distinct	ATAC.similar
TraesCS1B02G274300	C5	Ortho.DEG	RNA.distinct	ATAC.distinct
TraesCS1B02G274600	C2	Ortho.DEG	RNA.similar	ATAC.similar
TraesCS1B02G275200	C1	Ortho.DEG	RNA.similar	ATAC.distinct
TraesCS1B02G275500	C2	Ortho.DEG	RNA.similar	ATAC.distinct
TraesCS1B02G275600	C3	Ortho.DEG	RNA.distinct	ATAC.similar
TraesCS1B02G277000	C5	Ortho.DEG	RNA.similar	ATAC.distinct
TraesCS1B02G277300	C6	Ortho.DEG	RNA.distinct	ATAC.distinct
TraesCS1B02G278500	C1	Ortho.DEG	RNA.distinct	ATAC.distinct
TraesCS1B02G279100	C3	Ortho.DEG	RNA.distinct	ATAC.distinct
TraesCS1B02G279500	C4	Ortho.DEG	RNA.similar	ATAC.distinct
TraesCS1B02G279800	C6	Ortho.DEG	RNA.similar	ATAC.distinct
TraesCS1B02G280000	C3	Ortho.DEG	RNA.distinct	ATAC.similar
TraesCS1B02G280600	C5	Ortho.DEG	RNA.distinct	ATAC.distinct
TraesCS1B02G280900	C5	Ortho.DEG	RNA.distinct	ATAC.distinct
TraesCS1B02G281000	C1	Ortho.DEG	RNA.similar	ATAC.distinct
TraesCS1B02G281100	C1	Ortho.DEG	RNA.similar	ATAC.distinct
TraesCS1B02G281700	C1	Ortho.DEG	RNA.similar	ATAC.distinct
TraesCS1B02G282800	C1	Ortho.DEG	RNA.similar	ATAC.distinct
TraesCS1B02G282900	C1	Ortho.DEG	RNA.similar	ATAC.similar
TraesCS1B02G283300	C3	Ortho.DEG	RNA.distinct	ATAC.distinct
TraesCS1B02G283400	C5	Ortho.DEG	RNA.similar	ATAC.similar
TraesCS1B02G283600	C3	Ortho.DEG	RNA.distinct	ATAC.similar
TraesCS1B02G284200	C1	Ortho.DEG	RNA.distinct	ATAC.distinct
TraesCS1B02G284400	C4	Ortho.DEG	RNA.distinct	ATAC.distinct
TraesCS1B02G284600	C4	Ortho.DEG	RNA.distinct	ATAC.distinct
TraesCS1B02G285000	C1	Ortho.DEG	RNA.distinct	ATAC.distinct
TraesCS1B02G286300	C1	Ortho.DEG	RNA.similar	ATAC.distinct
TraesCS1B02G286500	C5	Ortho.DEG	RNA.distinct	ATAC.similar
TraesCS1B02G287100	C1	Ortho.DEG	RNA.distinct	ATAC.distinct
TraesCS1B02G287200	C1	Ortho.DEG	RNA.similar	ATAC.distinct
TraesCS1B02G288000	C1	Ortho.DEG	RNA.similar	ATAC.distinct
TraesCS1B02G288800	C6	Ortho.DEG	RNA.distinct	ATAC.similar
TraesCS1B02G289600	C3	Ortho.DEG	RNA.distinct	ATAC.distinct
TraesCS1B02G290300	C6	Ortho.DEG	RNA.similar	ATAC.distinct
TraesCS1B02G290500	C6	Ortho.DEG	RNA.distinct	ATAC.distinct
TraesCS1B02G290800	C5	Ortho.DEG	RNA.distinct	ATAC.distinct
TraesCS1B02G291200	C2	Ortho.DEG	RNA.distinct	ATAC.similar
TraesCS1B02G294300	C1	Ortho.DEG	RNA.similar	ATAC.distinct
TraesCS1B02G294700	C3	Ortho.DEG	RNA.similar	ATAC.distinct
TraesCS1B02G295700	C5	Ortho.DEG	RNA.distinct	ATAC.similar
TraesCS1B02G296500	C6	Ortho.DEG	RNA.similar	ATAC.distinct
TraesCS1B02G296900	C5	Ortho.DEG	RNA.similar	ATAC.distinct
TraesCS1B02G297700	C4	Ortho.DEG	RNA.distinct	ATAC.distinct
TraesCS1B02G298500	C3	Ortho.DEG	RNA.similar	ATAC.distinct
TraesCS1B02G300900	C2	Ortho.DEG	RNA.distinct	ATAC.distinct
TraesCS1B02G301100	C2	Ortho.DEG	RNA.distinct	ATAC.distinct
TraesCS1B02G301500	C1	Ortho.DEG	RNA.distinct	ATAC.distinct
TraesCS1B02G304800	C1	Ortho.DEG	RNA.distinct	ATAC.distinct
TraesCS1B02G306400	C2	Ortho.DEG	RNA.distinct	ATAC.distinct
TraesCS1B02G306500	C2	Ortho.DEG	RNA.distinct	ATAC.distinct
TraesCS1B02G307200	C1	Ortho.DEG	RNA.similar	ATAC.similar
TraesCS1B02G307700	C1	Ortho.DEG	RNA.similar	ATAC.distinct
TraesCS1B02G308200	C6	Ortho.DEG	RNA.distinct	ATAC.similar
TraesCS1B02G308300	C1	Ortho.DEG	RNA.similar	ATAC.distinct
TraesCS1B02G308900	C3	Ortho.DEG	RNA.distinct	ATAC.similar
TraesCS1B02G309300	C2	Ortho.DEG	RNA.distinct	ATAC.similar
TraesCS1B02G310100	C1	Ortho.DEG	RNA.similar	ATAC.similar
TraesCS1B02G312900	C2	Ortho.DEG	RNA.distinct	ATAC.distinct
TraesCS1B02G313100	C6	Ortho.DEG	RNA.distinct	ATAC.distinct
TraesCS1B02G313700	C2	Ortho.DEG	RNA.similar	ATAC.distinct
TraesCS1B02G314000	C3	Ortho.DEG	RNA.distinct	ATAC.distinct
TraesCS1B02G314700	C4	Ortho.DEG	RNA.distinct	ATAC.distinct
TraesCS1B02G316800	C5	Ortho.DEG	RNA.distinct	ATAC.distinct
TraesCS1B02G317000	C4	Ortho.DEG	RNA.distinct	ATAC.similar
TraesCS1B02G317100	C1	Ortho.DEG	RNA.distinct	ATAC.similar
TraesCS1B02G317200	C2	Ortho.DEG	RNA.distinct	ATAC.distinct
TraesCS1B02G318500	C1	Ortho.DEG	RNA.distinct	ATAC.distinct
TraesCS1B02G318800	C6	Ortho.DEG	RNA.distinct	ATAC.distinct
TraesCS1B02G319000	C1	Ortho.DEG	RNA.distinct	ATAC.similar
TraesCS1B02G319200	C4	Ortho.DEG	RNA.distinct	ATAC.distinct
TraesCS1B02G320900	C2	Ortho.DEG	RNA.distinct	ATAC.distinct
TraesCS1B02G321000	C2	Ortho.DEG	RNA.distinct	ATAC.similar
TraesCS1B02G321300	C3	Ortho.DEG	RNA.similar	ATAC.distinct
TraesCS1B02G321800	C1	Ortho.DEG	RNA.distinct	ATAC.distinct
TraesCS1B02G322100	C1	Ortho.DEG	RNA.similar	ATAC.similar
TraesCS1B02G322400	C5	Ortho.DEG	RNA.distinct	ATAC.distinct
TraesCS1B02G323800	C3	Ortho.DEG	RNA.similar	ATAC.distinct
TraesCS1B02G323900	C3	Ortho.DEG	RNA.distinct	ATAC.distinct
TraesCS1B02G325800	C1	Ortho.DEG	RNA.similar	ATAC.distinct
TraesCS1B02G326400	C2	Ortho.DEG	RNA.distinct	ATAC.distinct
TraesCS1B02G326600	C1	Ortho.DEG	RNA.similar	ATAC.distinct
TraesCS1B02G331900	C5	Ortho.DEG	RNA.distinct	ATAC.distinct
TraesCS1B02G332200	C1	Ortho.DEG	RNA.distinct	ATAC.distinct
TraesCS1B02G332700	C1	Ortho.DEG	RNA.distinct	ATAC.distinct
TraesCS1B02G333500	C4	Ortho.DEG	RNA.similar	ATAC.similar
TraesCS1B02G333600	C1	Ortho.DEG	RNA.similar	ATAC.distinct
TraesCS1B02G334200	C5	Ortho.DEG	RNA.distinct	ATAC.distinct
TraesCS1B02G334600	C3	Ortho.DEG	RNA.distinct	ATAC.distinct
TraesCS1B02G335000	C6	Ortho.DEG	RNA.similar	ATAC.similar
TraesCS1B02G336300	C5	Ortho.DEG	RNA.distinct	ATAC.distinct
TraesCS1B02G337400	C6	Ortho.DEG	RNA.similar	ATAC.distinct
TraesCS1B02G338500	C6	Ortho.DEG	RNA.distinct	ATAC.distinct
TraesCS1B02G339100	C5	Ortho.DEG	RNA.distinct	ATAC.distinct
TraesCS1B02G340800	C1	Ortho.DEG	RNA.distinct	ATAC.distinct
TraesCS1B02G342100	C4	Ortho.DEG	RNA.distinct	ATAC.distinct
TraesCS1B02G342400	C4	Ortho.DEG	RNA.distinct	ATAC.similar
TraesCS1B02G342700	C4	Ortho.DEG	RNA.distinct	ATAC.distinct
TraesCS1B02G343100	C6	Ortho.DEG	RNA.similar	ATAC.similar
TraesCS1B02G343900	C4	Ortho.DEG	RNA.distinct	ATAC.distinct
TraesCS1B02G344400	C6	Ortho.DEG	RNA.distinct	ATAC.distinct
TraesCS1B02G345000	C3	Ortho.DEG	RNA.distinct	ATAC.distinct
TraesCS1B02G345400	C4	Ortho.DEG	RNA.distinct	ATAC.similar
TraesCS1B02G345500	C4	Ortho.DEG	RNA.distinct	ATAC.distinct
TraesCS1B02G346200	C5	Ortho.DEG	RNA.distinct	ATAC.distinct
TraesCS1B02G346300	C5	Ortho.DEG	RNA.distinct	ATAC.distinct
TraesCS1B02G346900	C2	Ortho.DEG	RNA.similar	ATAC.distinct
TraesCS1B02G347000	C2	Ortho.DEG	RNA.similar	ATAC.similar
TraesCS1B02G347900	C5	Ortho.DEG	RNA.similar	ATAC.distinct
TraesCS1B02G350200	C5	Ortho.DEG	RNA.distinct	ATAC.similar
TraesCS1B02G350600	C1	Ortho.DEG	RNA.distinct	ATAC.distinct
TraesCS1B02G350700	C3	Ortho.DEG	RNA.distinct	ATAC.distinct
TraesCS1B02G352300	C6	Ortho.DEG	RNA.similar	ATAC.distinct
TraesCS1B02G352700	C6	Ortho.DEG	RNA.similar	ATAC.distinct
TraesCS1B02G354000	C1	Ortho.DEG	RNA.distinct	ATAC.distinct
TraesCS1B02G354200	C6	Ortho.DEG	RNA.distinct	ATAC.distinct
TraesCS1B02G354500	C1	Ortho.DEG	RNA.distinct	ATAC.distinct
TraesCS1B02G355600	C5	Ortho.DEG	RNA.distinct	ATAC.distinct
TraesCS1B02G355900	C5	Ortho.DEG	RNA.distinct	ATAC.distinct
TraesCS1B02G356100	C3	Ortho.DEG	RNA.distinct	ATAC.similar
TraesCS1B02G356200	C3	Ortho.DEG	RNA.similar	ATAC.distinct
TraesCS1B02G356600	C5	Ortho.DEG	RNA.similar	ATAC.similar
TraesCS1B02G356800	C6	Ortho.DEG	RNA.similar	ATAC.distinct
TraesCS1B02G357000	C4	Ortho.DEG	RNA.distinct	ATAC.distinct
TraesCS1B02G357600	C1	Ortho.DEG	RNA.distinct	ATAC.similar
TraesCS1B02G359500	C6	Ortho.DEG	RNA.distinct	ATAC.distinct
TraesCS1B02G360300	C1	Ortho.DEG	RNA.distinct	ATAC.distinct
TraesCS1B02G360700	C6	Ortho.DEG	RNA.distinct	ATAC.distinct
TraesCS1B02G360800	C1	Ortho.DEG	RNA.similar	ATAC.distinct
TraesCS1B02G360900	C1	Ortho.DEG	RNA.similar	ATAC.distinct
TraesCS1B02G362900	C5	Ortho.DEG	RNA.distinct	ATAC.distinct
TraesCS1B02G363400	C1	Ortho.DEG	RNA.similar	ATAC.distinct
TraesCS1B02G363700	C4	Ortho.DEG	RNA.distinct	ATAC.distinct
TraesCS1B02G363900	C5	Ortho.DEG	RNA.distinct	ATAC.distinct
TraesCS1B02G364000	C3	Ortho.DEG	RNA.similar	ATAC.distinct
TraesCS1B02G364200	C3	Ortho.DEG	RNA.distinct	ATAC.distinct
TraesCS1B02G364900	C6	Ortho.DEG	RNA.similar	ATAC.distinct
TraesCS1B02G365000	C5	Ortho.DEG	RNA.distinct	ATAC.distinct
TraesCS1B02G366100	C1	Ortho.DEG	RNA.similar	ATAC.distinct
TraesCS1B02G369000	C5	Ortho.DEG	RNA.distinct	ATAC.distinct
TraesCS1B02G371100	C1	Ortho.DEG	RNA.similar	ATAC.distinct
TraesCS1B02G371300	C1	Ortho.DEG	RNA.similar	ATAC.distinct
TraesCS1B02G371900	C1	Ortho.DEG	RNA.similar	ATAC.distinct
TraesCS1B02G373100	C4	Ortho.DEG	RNA.distinct	ATAC.similar
TraesCS1B02G374000	C4	Ortho.DEG	RNA.distinct	ATAC.distinct
TraesCS1B02G374200	C1	Ortho.DEG	RNA.distinct	ATAC.similar
TraesCS1B02G374900	C5	Ortho.DEG	RNA.distinct	ATAC.distinct
TraesCS1B02G375100	C1	Ortho.DEG	RNA.similar	ATAC.distinct
TraesCS1B02G377100	C6	Ortho.DEG	RNA.distinct	ATAC.similar
TraesCS1B02G378300	C2	Ortho.DEG	RNA.distinct	ATAC.similar
TraesCS1B02G379600	C2	Ortho.DEG	RNA.similar	ATAC.similar
TraesCS1B02G380000	C1	Ortho.DEG	RNA.distinct	ATAC.similar
TraesCS1B02G380300	C1	Ortho.DEG	RNA.similar	ATAC.distinct
TraesCS1B02G380900	C5	Ortho.DEG	RNA.distinct	ATAC.distinct
TraesCS1B02G381000	C5	Ortho.DEG	RNA.distinct	ATAC.distinct
TraesCS1B02G382600	C6	Ortho.DEG	RNA.distinct	ATAC.distinct
TraesCS1B02G384100	C1	Ortho.DEG	RNA.similar	ATAC.distinct
TraesCS1B02G384500	C1	Ortho.DEG	RNA.similar	ATAC.distinct
TraesCS1B02G384700	C1	Ortho.DEG	RNA.similar	ATAC.distinct
TraesCS1B02G384900	C1	Ortho.DEG	RNA.similar	ATAC.similar
TraesCS1B02G385000	C1	Ortho.DEG	RNA.similar	ATAC.similar
TraesCS1B02G385100	C1	Ortho.DEG	RNA.similar	ATAC.similar
TraesCS1B02G385200	C1	Ortho.DEG	RNA.similar	ATAC.similar
TraesCS1B02G385300	C1	Ortho.DEG	RNA.similar	ATAC.similar
TraesCS1B02G386200	C1	Ortho.DEG	RNA.similar	ATAC.similar
TraesCS1B02G386400	C1	Ortho.DEG	RNA.similar	ATAC.similar
TraesCS1B02G386500	C2	Ortho.DEG	RNA.distinct	ATAC.similar
TraesCS1B02G386600	C4	Ortho.DEG	RNA.distinct	ATAC.similar
TraesCS1B02G386700	C2	Ortho.DEG	RNA.distinct	ATAC.similar
TraesCS1B02G387100	C2	Ortho.DEG	RNA.similar	ATAC.distinct
TraesCS1B02G388100	C6	Ortho.DEG	RNA.similar	ATAC.distinct
TraesCS1B02G388700	C1	Ortho.DEG	RNA.distinct	ATAC.distinct
TraesCS1B02G388800	C1	Ortho.DEG	RNA.similar	ATAC.distinct
TraesCS1B02G388900	C4	Ortho.DEG	RNA.distinct	ATAC.distinct
TraesCS1B02G389100	C1	Ortho.DEG	RNA.distinct	ATAC.distinct
TraesCS1B02G389200	C2	Ortho.DEG	RNA.distinct	ATAC.distinct
TraesCS1B02G389700	C1	Ortho.DEG	RNA.similar	ATAC.similar
TraesCS1B02G389900	C1	Ortho.DEG	RNA.similar	ATAC.distinct
TraesCS1B02G391900	C1	Ortho.DEG	RNA.distinct	ATAC.distinct
TraesCS1B02G392000	C6	Ortho.DEG	RNA.similar	ATAC.distinct
TraesCS1B02G392300	C3	Ortho.DEG	RNA.distinct	ATAC.similar
TraesCS1B02G392400	C5	Ortho.DEG	RNA.distinct	ATAC.distinct
TraesCS1B02G393200	C6	Ortho.DEG	RNA.distinct	ATAC.distinct
TraesCS1B02G393400	C3	Ortho.DEG	RNA.distinct	ATAC.distinct
TraesCS1B02G393700	C5	Ortho.DEG	RNA.distinct	ATAC.distinct
TraesCS1B02G395400	C4	Ortho.DEG	RNA.distinct	ATAC.distinct
TraesCS1B02G396000	C1	Ortho.DEG	RNA.similar	ATAC.similar
TraesCS1B02G398400	C4	Ortho.DEG	RNA.similar	ATAC.distinct
TraesCS1B02G398800	C5	Ortho.DEG	RNA.distinct	ATAC.similar
TraesCS1B02G399000	C3	Ortho.DEG	RNA.distinct	ATAC.similar
TraesCS1B02G400300	C5	Ortho.DEG	RNA.distinct	ATAC.distinct
TraesCS1B02G400500	C3	Ortho.DEG	RNA.distinct	ATAC.distinct
TraesCS1B02G401300	C5	Ortho.DEG	RNA.distinct	ATAC.distinct
TraesCS1B02G401600	C5	Ortho.DEG	RNA.distinct	ATAC.distinct
TraesCS1B02G401900	C4	Ortho.DEG	RNA.distinct	ATAC.distinct
TraesCS1B02G409800	C5	Ortho.DEG	RNA.distinct	ATAC.distinct
TraesCS1B02G410800	C6	Ortho.DEG	RNA.distinct	ATAC.distinct
TraesCS1B02G410900	C6	Ortho.DEG	RNA.similar	ATAC.distinct
TraesCS1B02G411400	C4	Ortho.DEG	RNA.similar	ATAC.distinct
TraesCS1B02G411900	C5	Ortho.DEG	RNA.distinct	ATAC.distinct
TraesCS1B02G413400	C1	Ortho.DEG	RNA.similar	ATAC.distinct
TraesCS1B02G413900	C3	Ortho.DEG	RNA.distinct	ATAC.distinct
TraesCS1B02G414300	C1	Ortho.DEG	RNA.distinct	ATAC.similar
TraesCS1B02G414800	C1	Ortho.DEG	RNA.distinct	ATAC.distinct
TraesCS1B02G415800	C3	Ortho.DEG	RNA.distinct	ATAC.distinct
TraesCS1B02G416600	C2	Ortho.DEG	RNA.distinct	ATAC.similar
TraesCS1B02G417100	C6	Ortho.DEG	RNA.distinct	ATAC.similar
TraesCS1B02G417200	C6	Ortho.DEG	RNA.similar	ATAC.distinct
TraesCS1B02G418400	C2	Ortho.DEG	RNA.distinct	ATAC.similar
TraesCS1B02G418500	C3	Ortho.DEG	RNA.distinct	ATAC.distinct
TraesCS1B02G418600	C1	Ortho.DEG	RNA.similar	ATAC.distinct
TraesCS1B02G420000	C5	Ortho.DEG	RNA.distinct	ATAC.distinct
TraesCS1B02G422400	C1	Ortho.DEG	RNA.similar	ATAC.distinct
TraesCS1B02G424700	C2	Ortho.DEG	RNA.distinct	ATAC.distinct
TraesCS1B02G424900	C5	Ortho.DEG	RNA.distinct	ATAC.distinct
TraesCS1B02G425000	C3	Ortho.DEG	RNA.distinct	ATAC.similar
TraesCS1B02G426200	C1	Ortho.DEG	RNA.similar	ATAC.distinct
TraesCS1B02G427700	C3	Ortho.DEG	RNA.distinct	ATAC.distinct
TraesCS1B02G431200	C4	Ortho.DEG	RNA.distinct	ATAC.distinct
TraesCS1B02G432400	C1	Ortho.DEG	RNA.similar	ATAC.similar
TraesCS1B02G433800	C6	Ortho.DEG	RNA.similar	ATAC.similar
TraesCS1B02G434000	C4	Ortho.DEG	RNA.distinct	ATAC.distinct
TraesCS1B02G437500	C6	Ortho.DEG	RNA.distinct	ATAC.distinct
TraesCS1B02G439700	C1	Ortho.DEG	RNA.similar	ATAC.distinct
TraesCS1B02G439800	C5	Ortho.DEG	RNA.distinct	ATAC.distinct
TraesCS1B02G439900	C2	Ortho.DEG	RNA.distinct	ATAC.distinct
TraesCS1B02G440300	C4	Ortho.DEG	RNA.distinct	ATAC.similar
TraesCS1B02G440500	C5	Ortho.DEG	RNA.distinct	ATAC.distinct
TraesCS1B02G440600	C1	Ortho.DEG	RNA.similar	ATAC.distinct
TraesCS1B02G440800	C1	Ortho.DEG	RNA.similar	ATAC.distinct
TraesCS1B02G442000	C1	Ortho.DEG	RNA.similar	ATAC.distinct
TraesCS1B02G442500	C4	Ortho.DEG	RNA.distinct	ATAC.distinct
TraesCS1B02G442700	C4	Ortho.DEG	RNA.similar	ATAC.distinct
TraesCS1B02G443200	C1	Ortho.DEG	RNA.distinct	ATAC.similar
TraesCS1B02G444400	C1	Ortho.DEG	RNA.distinct	ATAC.distinct
TraesCS1B02G444500	C5	Ortho.DEG	RNA.distinct	ATAC.distinct
TraesCS1B02G446000	C1	Ortho.DEG	RNA.distinct	ATAC.distinct
TraesCS1B02G446300	C4	Ortho.DEG	RNA.distinct	ATAC.distinct
TraesCS1B02G446400	C1	Ortho.DEG	RNA.similar	ATAC.similar
TraesCS1B02G446900	C1	Ortho.DEG	RNA.similar	ATAC.distinct
TraesCS1B02G447900	C4	Ortho.DEG	RNA.distinct	ATAC.distinct
TraesCS1B02G448000	C4	Ortho.DEG	RNA.distinct	ATAC.distinct
TraesCS1B02G448100	C3	Ortho.DEG	RNA.distinct	ATAC.distinct
TraesCS1B02G448300	C5	Ortho.DEG	RNA.distinct	ATAC.distinct
TraesCS1B02G449700	C5	Ortho.DEG	RNA.distinct	ATAC.similar
TraesCS1B02G449800	C2	Ortho.DEG	RNA.similar	ATAC.distinct
TraesCS1B02G450400	C4	Ortho.DEG	RNA.similar	ATAC.distinct
TraesCS1B02G452000	C5	Ortho.DEG	RNA.distinct	ATAC.distinct
TraesCS1B02G455900	C3	Ortho.DEG	RNA.distinct	ATAC.distinct
TraesCS1B02G456500	C1	Ortho.DEG	RNA.similar	ATAC.similar
TraesCS1B02G456600	C3	Ortho.DEG	RNA.similar	ATAC.distinct
TraesCS1B02G456900	C5	Ortho.DEG	RNA.distinct	ATAC.distinct
TraesCS1B02G458900	C4	Ortho.DEG	RNA.distinct	ATAC.distinct
TraesCS1B02G459500	C1	Ortho.DEG	RNA.distinct	ATAC.distinct
TraesCS1B02G459600	C1	Ortho.DEG	RNA.similar	ATAC.distinct
TraesCS1B02G459700	C5	Ortho.DEG	RNA.distinct	ATAC.distinct
TraesCS1B02G459800	C6	Ortho.DEG	RNA.distinct	ATAC.distinct
TraesCS1B02G462300	C2	Ortho.DEG	RNA.distinct	ATAC.distinct
TraesCS1B02G463100	C5	Ortho.DEG	RNA.distinct	ATAC.similar
TraesCS1B02G464800	C5	Ortho.DEG	RNA.distinct	ATAC.distinct
TraesCS1B02G464900	C5	Ortho.DEG	RNA.distinct	ATAC.distinct
TraesCS1B02G465000	C1	Ortho.DEG	RNA.distinct	ATAC.distinct
TraesCS1B02G465400	C6	Ortho.DEG	RNA.similar	ATAC.distinct
TraesCS1B02G466100	C5	Ortho.DEG	RNA.distinct	ATAC.distinct
TraesCS1B02G466300	C3	Ortho.DEG	RNA.distinct	ATAC.distinct
TraesCS1B02G468900	C1	Ortho.DEG	RNA.distinct	ATAC.distinct
TraesCS1B02G472000	C4	Ortho.DEG	RNA.distinct	ATAC.distinct
TraesCS1B02G472100	C6	Ortho.DEG	RNA.distinct	ATAC.distinct
TraesCS1B02G472200	C1	Ortho.DEG	RNA.distinct	ATAC.similar
TraesCS1B02G475400	C5	Ortho.DEG	RNA.distinct	ATAC.distinct
TraesCS1B02G475800	C6	Ortho.DEG	RNA.distinct	ATAC.distinct
TraesCS1B02G476400	C4	Ortho.DEG	RNA.distinct	ATAC.distinct
TraesCS1B02G476700	C3	Ortho.DEG	RNA.distinct	ATAC.similar
TraesCS1B02G477500	C5	Ortho.DEG	RNA.distinct	ATAC.similar
TraesCS1B02G478400	C1	Ortho.DEG	RNA.similar	ATAC.distinct
TraesCS1B02G478700	C5	Ortho.DEG	RNA.distinct	ATAC.distinct
TraesCS1B02G479800	C2	Ortho.DEG	RNA.similar	ATAC.distinct
TraesCS1B02G480100	C4	Ortho.DEG	RNA.distinct	ATAC.distinct
TraesCS1B02G480400	C3	Ortho.DEG	RNA.similar	ATAC.distinct
TraesCS1D02G002400	C2	Ortho.DEG	RNA.similar	ATAC.distinct
TraesCS1D02G007700	C1	Ortho.DEG	RNA.similar	ATAC.distinct
TraesCS1D02G010200	C4	Ortho.DEG	RNA.distinct	ATAC.similar
TraesCS1D02G017600	C4	Ortho.DEG	RNA.distinct	ATAC.distinct
TraesCS1D02G018300	C5	Ortho.DEG	RNA.distinct	ATAC.similar
TraesCS1D02G019700	C4	Ortho.DEG	RNA.distinct	ATAC.distinct
TraesCS1D02G020100	C5	Ortho.DEG	RNA.distinct	ATAC.distinct
TraesCS1D02G022800	C3	Ortho.DEG	RNA.distinct	ATAC.distinct
TraesCS1D02G022900	C1	Ortho.DEG	RNA.similar	ATAC.distinct
TraesCS1D02G026500	C5	Ortho.DEG	RNA.similar	ATAC.distinct
TraesCS1D02G029500	C2	Ortho.DEG	RNA.distinct	ATAC.distinct
TraesCS1D02G030400	C3	Ortho.DEG	RNA.similar	ATAC.similar
TraesCS1D02G030600	C1	Ortho.DEG	RNA.distinct	ATAC.distinct
TraesCS1D02G031400	C6	Ortho.DEG	RNA.similar	ATAC.distinct
TraesCS1D02G031500	C5	Ortho.DEG	RNA.distinct	ATAC.distinct
TraesCS1D02G031700	C3	Ortho.DEG	RNA.distinct	ATAC.distinct
TraesCS1D02G034600	C1	Ortho.DEG	RNA.similar	ATAC.distinct
TraesCS1D02G034700	C1	Ortho.DEG	RNA.distinct	ATAC.similar
TraesCS1D02G034900	C6	Ortho.DEG	RNA.distinct	ATAC.distinct
TraesCS1D02G035300	C4	Ortho.DEG	RNA.distinct	ATAC.distinct
TraesCS1D02G035600	C2	Ortho.DEG	RNA.distinct	ATAC.distinct
TraesCS1D02G036500	C1	Ortho.DEG	RNA.similar	ATAC.distinct
TraesCS1D02G036700	C1	Ortho.DEG	RNA.similar	ATAC.similar
TraesCS1D02G036900	C3	Ortho.DEG	RNA.distinct	ATAC.distinct
TraesCS1D02G038300	C6	Ortho.DEG	RNA.similar	ATAC.distinct
TraesCS1D02G039300	C5	Ortho.DEG	RNA.distinct	ATAC.similar
TraesCS1D02G039500	C5	Ortho.DEG	RNA.similar	ATAC.distinct
TraesCS1D02G040000	C3	Ortho.DEG	RNA.distinct	ATAC.distinct
TraesCS1D02G040100	C2	Ortho.DEG	RNA.distinct	ATAC.distinct
TraesCS1D02G040500	C3	Ortho.DEG	RNA.distinct	ATAC.distinct
TraesCS1D02G041300	C5	Ortho.DEG	RNA.distinct	ATAC.distinct
TraesCS1D02G041400	C6	Ortho.DEG	RNA.similar	ATAC.distinct
TraesCS1D02G042900	C2	Ortho.DEG	RNA.similar	ATAC.distinct
TraesCS1D02G043300	C6	Ortho.DEG	RNA.distinct	ATAC.similar
TraesCS1D02G043400	C4	Ortho.DEG	RNA.similar	ATAC.distinct
TraesCS1D02G043600	C4	Ortho.DEG	RNA.similar	ATAC.similar
TraesCS1D02G044200	C5	Ortho.DEG	RNA.distinct	ATAC.distinct
TraesCS1D02G045200	C3	Ortho.DEG	RNA.distinct	ATAC.distinct
TraesCS1D02G046100	C5	Ortho.DEG	RNA.distinct	ATAC.similar
TraesCS1D02G048200	C5	Ortho.DEG	RNA.distinct	ATAC.distinct
TraesCS1D02G052000	C1	Ortho.DEG	RNA.distinct	ATAC.similar
TraesCS1D02G052200	C3	Ortho.DEG	RNA.distinct	ATAC.distinct
TraesCS1D02G053800	C5	Ortho.DEG	RNA.distinct	ATAC.distinct
TraesCS1D02G054200	C5	Ortho.DEG	RNA.distinct	ATAC.similar
TraesCS1D02G054700	C3	Ortho.DEG	RNA.similar	ATAC.distinct
TraesCS1D02G055200	C3	Ortho.DEG	RNA.distinct	ATAC.distinct
TraesCS1D02G055900	C3	Ortho.DEG	RNA.distinct	ATAC.distinct
TraesCS1D02G056500	C5	Ortho.DEG	RNA.distinct	ATAC.distinct
TraesCS1D02G057300	C6	Ortho.DEG	RNA.distinct	ATAC.similar
TraesCS1D02G059000	C4	Ortho.DEG	RNA.distinct	ATAC.distinct
TraesCS1D02G059200	C3	Ortho.DEG	RNA.distinct	ATAC.similar
TraesCS1D02G059600	C4	Ortho.DEG	RNA.similar	ATAC.distinct
TraesCS1D02G060600	C3	Ortho.DEG	RNA.distinct	ATAC.distinct
TraesCS1D02G061600	C4	Ortho.DEG	RNA.distinct	ATAC.distinct
TraesCS1D02G062800	C5	Ortho.DEG	RNA.distinct	ATAC.distinct
TraesCS1D02G064500	C5	Ortho.DEG	RNA.similar	ATAC.distinct
TraesCS1D02G066000	C5	Ortho.DEG	RNA.distinct	ATAC.distinct
TraesCS1D02G066600	C4	Ortho.DEG	RNA.distinct	ATAC.distinct
TraesCS1D02G067200	C1	Ortho.DEG	RNA.distinct	ATAC.distinct
TraesCS1D02G067800	C5	Ortho.DEG	RNA.distinct	ATAC.distinct
TraesCS1D02G069300	C5	Ortho.DEG	RNA.distinct	ATAC.distinct
TraesCS1D02G071800	C3	Ortho.DEG	RNA.distinct	ATAC.similar
TraesCS1D02G072200	C1	Ortho.DEG	RNA.similar	ATAC.distinct
TraesCS1D02G072600	C2	Ortho.DEG	RNA.distinct	ATAC.similar
TraesCS1D02G072700	C1	Ortho.DEG	RNA.similar	ATAC.distinct
TraesCS1D02G073000	C3	Ortho.DEG	RNA.distinct	ATAC.distinct
TraesCS1D02G073500	C4	Ortho.DEG	RNA.distinct	ATAC.distinct
TraesCS1D02G074400	C4	Ortho.DEG	RNA.distinct	ATAC.distinct
TraesCS1D02G076200	C5	Ortho.DEG	RNA.distinct	ATAC.distinct
TraesCS1D02G077600	C4	Ortho.DEG	RNA.distinct	ATAC.distinct
TraesCS1D02G079900	C4	Ortho.DEG	RNA.similar	ATAC.similar
TraesCS1D02G081100	C4	Ortho.DEG	RNA.distinct	ATAC.distinct
TraesCS1D02G081400	C1	Ortho.DEG	RNA.similar	ATAC.distinct
TraesCS1D02G081700	C5	Ortho.DEG	RNA.similar	ATAC.distinct
TraesCS1D02G081900	C4	Ortho.DEG	RNA.similar	ATAC.distinct
TraesCS1D02G082000	C6	Ortho.DEG	RNA.distinct	ATAC.distinct
TraesCS1D02G082200	C3	Ortho.DEG	RNA.distinct	ATAC.distinct
TraesCS1D02G082300	C6	Ortho.DEG	RNA.similar	ATAC.distinct
TraesCS1D02G082500	C3	Ortho.DEG	RNA.distinct	ATAC.similar
TraesCS1D02G082600	C3	Ortho.DEG	RNA.distinct	ATAC.distinct
TraesCS1D02G084200	C1	Ortho.DEG	RNA.similar	ATAC.similar
TraesCS1D02G084500	C1	Ortho.DEG	RNA.similar	ATAC.distinct
TraesCS1D02G084900	C1	Ortho.DEG	RNA.similar	ATAC.distinct
TraesCS1D02G085900	C1	Ortho.DEG	RNA.similar	ATAC.distinct
TraesCS1D02G086600	C5	Ortho.DEG	RNA.distinct	ATAC.distinct
TraesCS1D02G086700	C1	Ortho.DEG	RNA.distinct	ATAC.distinct
TraesCS1D02G087500	C6	Ortho.DEG	RNA.distinct	ATAC.distinct
TraesCS1D02G088100	C4	Ortho.DEG	RNA.distinct	ATAC.distinct
TraesCS1D02G088200	C5	Ortho.DEG	RNA.distinct	ATAC.distinct
TraesCS1D02G088700	C3	Ortho.DEG	RNA.distinct	ATAC.distinct
TraesCS1D02G090000	C6	Ortho.DEG	RNA.similar	ATAC.distinct
TraesCS1D02G090400	C1	Ortho.DEG	RNA.distinct	ATAC.distinct
TraesCS1D02G091200	C6	Ortho.DEG	RNA.distinct	ATAC.distinct
TraesCS1D02G091600	C1	Ortho.DEG	RNA.similar	ATAC.similar
TraesCS1D02G093900	C6	Ortho.DEG	RNA.distinct	ATAC.distinct
TraesCS1D02G094600	C6	Ortho.DEG	RNA.similar	ATAC.distinct
TraesCS1D02G095500	C4	Ortho.DEG	RNA.similar	ATAC.distinct
TraesCS1D02G096900	C6	Ortho.DEG	RNA.similar	ATAC.similar
TraesCS1D02G098700	C2	Ortho.DEG	RNA.distinct	ATAC.distinct
TraesCS1D02G099900	C4	Ortho.DEG	RNA.similar	ATAC.similar
TraesCS1D02G100000	C2	Ortho.DEG	RNA.distinct	ATAC.distinct
TraesCS1D02G100100	C1	Ortho.DEG	RNA.distinct	ATAC.distinct
TraesCS1D02G100800	C3	Ortho.DEG	RNA.distinct	ATAC.distinct
TraesCS1D02G101700	C1	Ortho.DEG	RNA.distinct	ATAC.distinct
TraesCS1D02G103500	C1	Ortho.DEG	RNA.distinct	ATAC.similar
TraesCS1D02G104400	C1	Ortho.DEG	RNA.similar	ATAC.similar
TraesCS1D02G106000	C5	Ortho.DEG	RNA.distinct	ATAC.distinct
TraesCS1D02G106500	C5	Ortho.DEG	RNA.similar	ATAC.distinct
TraesCS1D02G107000	C1	Ortho.DEG	RNA.similar	ATAC.distinct
TraesCS1D02G107200	C6	Ortho.DEG	RNA.similar	ATAC.similar
TraesCS1D02G107400	C1	Ortho.DEG	RNA.distinct	ATAC.distinct
TraesCS1D02G108200	C4	Ortho.DEG	RNA.distinct	ATAC.similar
TraesCS1D02G108300	C1	Ortho.DEG	RNA.similar	ATAC.distinct
TraesCS1D02G109100	C5	Ortho.DEG	RNA.distinct	ATAC.similar
TraesCS1D02G109200	C5	Ortho.DEG	RNA.distinct	ATAC.similar
TraesCS1D02G109700	C2	Ortho.DEG	RNA.distinct	ATAC.distinct
TraesCS1D02G109900	C4	Ortho.DEG	RNA.similar	ATAC.distinct
TraesCS1D02G110900	C5	Ortho.DEG	RNA.distinct	ATAC.distinct
TraesCS1D02G111500	C3	Ortho.DEG	RNA.distinct	ATAC.distinct
TraesCS1D02G112300	C6	Ortho.DEG	RNA.distinct	ATAC.distinct
TraesCS1D02G112500	C5	Ortho.DEG	RNA.distinct	ATAC.distinct
TraesCS1D02G113100	C3	Ortho.DEG	RNA.similar	ATAC.similar
TraesCS1D02G113700	C6	Ortho.DEG	RNA.similar	ATAC.distinct
TraesCS1D02G114300	C3	Ortho.DEG	RNA.distinct	ATAC.distinct
TraesCS1D02G115900	C6	Ortho.DEG	RNA.distinct	ATAC.distinct
TraesCS1D02G116600	C6	Ortho.DEG	RNA.distinct	ATAC.distinct
TraesCS1D02G116700	C3	Ortho.DEG	RNA.distinct	ATAC.similar
TraesCS1D02G116900	C5	Ortho.DEG	RNA.distinct	ATAC.distinct
TraesCS1D02G117100	C5	Ortho.DEG	RNA.distinct	ATAC.distinct
TraesCS1D02G118300	C1	Ortho.DEG	RNA.distinct	ATAC.distinct
TraesCS1D02G119500	C5	Ortho.DEG	RNA.distinct	ATAC.similar
TraesCS1D02G120000	C5	Ortho.DEG	RNA.distinct	ATAC.distinct
TraesCS1D02G120100	C5	Ortho.DEG	RNA.distinct	ATAC.distinct
TraesCS1D02G120200	C1	Ortho.DEG	RNA.similar	ATAC.distinct
TraesCS1D02G120300	C3	Ortho.DEG	RNA.similar	ATAC.distinct
TraesCS1D02G120500	C5	Ortho.DEG	RNA.similar	ATAC.distinct
TraesCS1D02G121000	C1	Ortho.DEG	RNA.distinct	ATAC.distinct
TraesCS1D02G121200	C1	Ortho.DEG	RNA.distinct	ATAC.distinct
TraesCS1D02G122100	C5	Ortho.DEG	RNA.distinct	ATAC.distinct
TraesCS1D02G122500	C6	Ortho.DEG	RNA.distinct	ATAC.distinct
TraesCS1D02G123400	C1	Ortho.DEG	RNA.similar	ATAC.distinct
TraesCS1D02G123500	C4	Ortho.DEG	RNA.distinct	ATAC.similar
TraesCS1D02G123700	C1	Ortho.DEG	RNA.distinct	ATAC.similar
TraesCS1D02G123800	C4	Ortho.DEG	RNA.similar	ATAC.similar
TraesCS1D02G124300	C6	Ortho.DEG	RNA.distinct	ATAC.distinct
TraesCS1D02G124400	C1	Ortho.DEG	RNA.similar	ATAC.similar
TraesCS1D02G125600	C5	Ortho.DEG	RNA.distinct	ATAC.similar
TraesCS1D02G125900	C3	Ortho.DEG	RNA.distinct	ATAC.distinct
TraesCS1D02G126300	C1	Ortho.DEG	RNA.distinct	ATAC.similar
TraesCS1D02G126400	C6	Ortho.DEG	RNA.similar	ATAC.distinct
TraesCS1D02G126600	C6	Ortho.DEG	RNA.similar	ATAC.distinct
TraesCS1D02G126900	C4	Ortho.DEG	RNA.distinct	ATAC.similar
TraesCS1D02G127800	C1	Ortho.DEG	RNA.similar	ATAC.distinct
TraesCS1D02G128000	C2	Ortho.DEG	RNA.similar	ATAC.similar
TraesCS1D02G128400	C3	Ortho.DEG	RNA.distinct	ATAC.similar
TraesCS1D02G129000	C3	Ortho.DEG	RNA.distinct	ATAC.distinct
TraesCS1D02G129100	C4	Ortho.DEG	RNA.similar	ATAC.distinct
TraesCS1D02G130600	C4	Ortho.DEG	RNA.distinct	ATAC.similar
TraesCS1D02G130900	C5	Ortho.DEG	RNA.similar	ATAC.distinct
TraesCS1D02G131500	C6	Ortho.DEG	RNA.similar	ATAC.distinct
TraesCS1D02G131600	C2	Ortho.DEG	RNA.distinct	ATAC.distinct
TraesCS1D02G132000	C6	Ortho.DEG	RNA.distinct	ATAC.distinct
TraesCS1D02G134100	C6	Ortho.DEG	RNA.similar	ATAC.distinct
TraesCS1D02G134300	C3	Ortho.DEG	RNA.similar	ATAC.distinct
TraesCS1D02G134600	C6	Ortho.DEG	RNA.distinct	ATAC.distinct
TraesCS1D02G134700	C4	Ortho.DEG	RNA.distinct	ATAC.distinct
TraesCS1D02G135800	C3	Ortho.DEG	RNA.distinct	ATAC.distinct
TraesCS1D02G137900	C3	Ortho.DEG	RNA.distinct	ATAC.distinct
TraesCS1D02G138000	C6	Ortho.DEG	RNA.similar	ATAC.distinct
TraesCS1D02G138800	C5	Ortho.DEG	RNA.distinct	ATAC.distinct
TraesCS1D02G139000	C2	Ortho.DEG	RNA.similar	ATAC.distinct
TraesCS1D02G139400	C1	Ortho.DEG	RNA.similar	ATAC.distinct
TraesCS1D02G140100	C3	Ortho.DEG	RNA.distinct	ATAC.distinct
TraesCS1D02G140200	C5	Ortho.DEG	RNA.distinct	ATAC.distinct
TraesCS1D02G140300	C3	Ortho.DEG	RNA.distinct	ATAC.distinct
TraesCS1D02G141000	C1	Ortho.DEG	RNA.similar	ATAC.distinct
TraesCS1D02G141700	C5	Ortho.DEG	RNA.distinct	ATAC.distinct
TraesCS1D02G141800	C6	Ortho.DEG	RNA.distinct	ATAC.distinct
TraesCS1D02G142000	C6	Ortho.DEG	RNA.distinct	ATAC.distinct
TraesCS1D02G142100	C1	Ortho.DEG	RNA.distinct	ATAC.distinct
TraesCS1D02G142400	C5	Ortho.DEG	RNA.similar	ATAC.similar
TraesCS1D02G142700	C1	Ortho.DEG	RNA.distinct	ATAC.distinct
TraesCS1D02G144000	C5	Ortho.DEG	RNA.distinct	ATAC.distinct
TraesCS1D02G144400	C5	Ortho.DEG	RNA.distinct	ATAC.distinct
TraesCS1D02G144800	C6	Ortho.DEG	RNA.similar	ATAC.distinct
TraesCS1D02G146500	C6	Ortho.DEG	RNA.similar	ATAC.distinct
TraesCS1D02G147400	C4	Ortho.DEG	RNA.distinct	ATAC.similar
TraesCS1D02G148000	C1	Ortho.DEG	RNA.similar	ATAC.similar
TraesCS1D02G148500	C6	Ortho.DEG	RNA.similar	ATAC.distinct
TraesCS1D02G148900	C1	Ortho.DEG	RNA.similar	ATAC.distinct
TraesCS1D02G149900	C6	Ortho.DEG	RNA.similar	ATAC.distinct
TraesCS1D02G150400	C1	Ortho.DEG	RNA.similar	ATAC.similar
TraesCS1D02G151500	C1	Ortho.DEG	RNA.similar	ATAC.distinct
TraesCS1D02G152000	C1	Ortho.DEG	RNA.distinct	ATAC.distinct
TraesCS1D02G152400	C4	Ortho.DEG	RNA.similar	ATAC.distinct
TraesCS1D02G153700	C3	Ortho.DEG	RNA.distinct	ATAC.similar
TraesCS1D02G153900	C1	Ortho.DEG	RNA.distinct	ATAC.distinct
TraesCS1D02G154400	C6	Ortho.DEG	RNA.similar	ATAC.distinct
TraesCS1D02G154700	C5	Ortho.DEG	RNA.distinct	ATAC.similar
TraesCS1D02G154900	C5	Ortho.DEG	RNA.similar	ATAC.distinct
TraesCS1D02G155000	C5	Ortho.DEG	RNA.distinct	ATAC.distinct
TraesCS1D02G155100	C2	Ortho.DEG	RNA.distinct	ATAC.similar
TraesCS1D02G155300	C4	Ortho.DEG	RNA.similar	ATAC.distinct
TraesCS1D02G157300	C6	Ortho.DEG	RNA.similar	ATAC.distinct
TraesCS1D02G158700	C1	Ortho.DEG	RNA.similar	ATAC.distinct
TraesCS1D02G159000	C6	Ortho.DEG	RNA.similar	ATAC.distinct
TraesCS1D02G161000	C1	Ortho.DEG	RNA.similar	ATAC.similar
TraesCS1D02G161900	C2	Ortho.DEG	RNA.distinct	ATAC.distinct
TraesCS1D02G162000	C5	Ortho.DEG	RNA.distinct	ATAC.distinct
TraesCS1D02G162400	C5	Ortho.DEG	RNA.distinct	ATAC.similar
TraesCS1D02G162600	C5	Ortho.DEG	RNA.distinct	ATAC.distinct
TraesCS1D02G163700	C6	Ortho.DEG	RNA.similar	ATAC.distinct
TraesCS1D02G165100	C6	Ortho.DEG	RNA.distinct	ATAC.distinct
TraesCS1D02G165400	C4	Ortho.DEG	RNA.distinct	ATAC.distinct
TraesCS1D02G165600	C3	Ortho.DEG	RNA.distinct	ATAC.distinct
TraesCS1D02G166100	C4	Ortho.DEG	RNA.distinct	ATAC.distinct
TraesCS1D02G166500	C1	Ortho.DEG	RNA.distinct	ATAC.distinct
TraesCS1D02G166600	C3	Ortho.DEG	RNA.distinct	ATAC.distinct
TraesCS1D02G167400	C4	Ortho.DEG	RNA.distinct	ATAC.distinct
TraesCS1D02G167600	C5	Ortho.DEG	RNA.similar	ATAC.distinct
TraesCS1D02G167800	C2	Ortho.DEG	RNA.distinct	ATAC.distinct
TraesCS1D02G168500	C1	Ortho.DEG	RNA.similar	ATAC.distinct
TraesCS1D02G168700	C1	Ortho.DEG	RNA.similar	ATAC.similar
TraesCS1D02G168900	C1	Ortho.DEG	RNA.similar	ATAC.distinct
TraesCS1D02G172800	C3	Ortho.DEG	RNA.distinct	ATAC.distinct
TraesCS1D02G173300	C6	Ortho.DEG	RNA.distinct	ATAC.distinct
TraesCS1D02G173800	C1	Ortho.DEG	RNA.distinct	ATAC.distinct
TraesCS1D02G174000	C6	Ortho.DEG	RNA.similar	ATAC.similar
TraesCS1D02G174700	C6	Ortho.DEG	RNA.similar	ATAC.distinct
TraesCS1D02G175200	C1	Ortho.DEG	RNA.similar	ATAC.distinct
TraesCS1D02G175400	C3	Ortho.DEG	RNA.distinct	ATAC.distinct
TraesCS1D02G175700	C1	Ortho.DEG	RNA.similar	ATAC.similar
TraesCS1D02G175800	C5	Ortho.DEG	RNA.similar	ATAC.distinct
TraesCS1D02G175900	C1	Ortho.DEG	RNA.similar	ATAC.distinct
TraesCS1D02G176000	C1	Ortho.DEG	RNA.distinct	ATAC.similar
TraesCS1D02G176400	C5	Ortho.DEG	RNA.distinct	ATAC.distinct
TraesCS1D02G176700	C5	Ortho.DEG	RNA.distinct	ATAC.distinct
TraesCS1D02G177000	C3	Ortho.DEG	RNA.distinct	ATAC.distinct
TraesCS1D02G177800	C1	Ortho.DEG	RNA.similar	ATAC.distinct
TraesCS1D02G178600	C5	Ortho.DEG	RNA.distinct	ATAC.distinct
TraesCS1D02G184400	C1	Ortho.DEG	RNA.similar	ATAC.similar
TraesCS1D02G184500	C5	Ortho.DEG	RNA.distinct	ATAC.distinct
TraesCS1D02G185000	C1	Ortho.DEG	RNA.distinct	ATAC.distinct
TraesCS1D02G185500	C1	Ortho.DEG	RNA.distinct	ATAC.distinct
TraesCS1D02G185600	C5	Ortho.DEG	RNA.distinct	ATAC.distinct
TraesCS1D02G186400	C5	Ortho.DEG	RNA.distinct	ATAC.distinct
TraesCS1D02G186500	C6	Ortho.DEG	RNA.distinct	ATAC.distinct
TraesCS1D02G187300	C6	Ortho.DEG	RNA.distinct	ATAC.distinct
TraesCS1D02G187400	C4	Ortho.DEG	RNA.distinct	ATAC.distinct
TraesCS1D02G187500	C1	Ortho.DEG	RNA.similar	ATAC.similar
TraesCS1D02G187700	C1	Ortho.DEG	RNA.similar	ATAC.distinct
TraesCS1D02G187900	C1	Ortho.DEG	RNA.similar	ATAC.distinct
TraesCS1D02G189600	C5	Ortho.DEG	RNA.distinct	ATAC.distinct
TraesCS1D02G190400	C3	Ortho.DEG	RNA.distinct	ATAC.distinct
TraesCS1D02G194000	C3	Ortho.DEG	RNA.distinct	ATAC.distinct
TraesCS1D02G194100	C2	Ortho.DEG	RNA.similar	ATAC.distinct
TraesCS1D02G194200	C5	Ortho.DEG	RNA.distinct	ATAC.distinct
TraesCS1D02G194900	C4	Ortho.DEG	RNA.similar	ATAC.similar
TraesCS1D02G195600	C6	Ortho.DEG	RNA.distinct	ATAC.distinct
TraesCS1D02G196400	C1	Ortho.DEG	RNA.similar	ATAC.distinct
TraesCS1D02G196900	C1	Ortho.DEG	RNA.similar	ATAC.distinct
TraesCS1D02G197300	C3	Ortho.DEG	RNA.distinct	ATAC.distinct
TraesCS1D02G198600	C3	Ortho.DEG	RNA.distinct	ATAC.distinct
TraesCS1D02G199300	C3	Ortho.DEG	RNA.distinct	ATAC.similar
TraesCS1D02G199800	C5	Ortho.DEG	RNA.distinct	ATAC.distinct
TraesCS1D02G200300	C1	Ortho.DEG	RNA.similar	ATAC.distinct
TraesCS1D02G200700	C5	Ortho.DEG	RNA.distinct	ATAC.distinct
TraesCS1D02G201700	C6	Ortho.DEG	RNA.similar	ATAC.distinct
TraesCS1D02G202200	C1	Ortho.DEG	RNA.similar	ATAC.distinct
TraesCS1D02G202300	C5	Ortho.DEG	RNA.similar	ATAC.similar
TraesCS1D02G202500	C3	Ortho.DEG	RNA.distinct	ATAC.distinct
TraesCS1D02G203900	C1	Ortho.DEG	RNA.distinct	ATAC.similar
TraesCS1D02G204200	C1	Ortho.DEG	RNA.distinct	ATAC.distinct
TraesCS1D02G204900	C5	Ortho.DEG	RNA.similar	ATAC.distinct
TraesCS1D02G205300	C3	Ortho.DEG	RNA.distinct	ATAC.distinct
TraesCS1D02G205500	C3	Ortho.DEG	RNA.distinct	ATAC.similar
TraesCS1D02G206700	C1	Ortho.DEG	RNA.similar	ATAC.similar
TraesCS1D02G206900	C5	Ortho.DEG	RNA.distinct	ATAC.distinct
TraesCS1D02G207000	C1	Ortho.DEG	RNA.distinct	ATAC.distinct
TraesCS1D02G207200	C4	Ortho.DEG	RNA.distinct	ATAC.distinct
TraesCS1D02G208000	C2	Ortho.DEG	RNA.distinct	ATAC.distinct
TraesCS1D02G208400	C1	Ortho.DEG	RNA.similar	ATAC.similar
TraesCS1D02G208900	C1	Ortho.DEG	RNA.distinct	ATAC.distinct
TraesCS1D02G209400	C2	Ortho.DEG	RNA.distinct	ATAC.distinct
TraesCS1D02G209700	C4	Ortho.DEG	RNA.similar	ATAC.distinct
TraesCS1D02G210800	C2	Ortho.DEG	RNA.distinct	ATAC.distinct
TraesCS1D02G211800	C6	Ortho.DEG	RNA.distinct	ATAC.distinct
TraesCS1D02G212300	C6	Ortho.DEG	RNA.similar	ATAC.distinct
TraesCS1D02G212400	C1	Ortho.DEG	RNA.similar	ATAC.similar
TraesCS1D02G212800	C5	Ortho.DEG	RNA.distinct	ATAC.similar
TraesCS1D02G213700	C5	Ortho.DEG	RNA.distinct	ATAC.similar
TraesCS1D02G213900	C5	Ortho.DEG	RNA.similar	ATAC.similar
TraesCS1D02G214700	C1	Ortho.DEG	RNA.similar	ATAC.distinct
TraesCS1D02G215100	C3	Ortho.DEG	RNA.distinct	ATAC.similar
TraesCS1D02G215200	C3	Ortho.DEG	RNA.distinct	ATAC.distinct
TraesCS1D02G215300	C3	Ortho.DEG	RNA.distinct	ATAC.similar
TraesCS1D02G215400	C3	Ortho.DEG	RNA.distinct	ATAC.distinct
TraesCS1D02G215500	C3	Ortho.DEG	RNA.distinct	ATAC.distinct
TraesCS1D02G215900	C5	Ortho.DEG	RNA.distinct	ATAC.distinct
TraesCS1D02G216600	C2	Ortho.DEG	RNA.similar	ATAC.distinct
TraesCS1D02G216700	C1	Ortho.DEG	RNA.similar	ATAC.distinct
TraesCS1D02G217600	C1	Ortho.DEG	RNA.distinct	ATAC.distinct
TraesCS1D02G218000	C1	Ortho.DEG	RNA.similar	ATAC.distinct
TraesCS1D02G218100	C1	Ortho.DEG	RNA.similar	ATAC.distinct
TraesCS1D02G218500	C4	Ortho.DEG	RNA.distinct	ATAC.distinct
TraesCS1D02G219400	C1	Ortho.DEG	RNA.similar	ATAC.distinct
TraesCS1D02G220300	C1	Ortho.DEG	RNA.distinct	ATAC.distinct
TraesCS1D02G220600	C3	Ortho.DEG	RNA.distinct	ATAC.distinct
TraesCS1D02G221500	C1	Ortho.DEG	RNA.similar	ATAC.similar
TraesCS1D02G222200	C2	Ortho.DEG	RNA.similar	ATAC.distinct
TraesCS1D02G222500	C3	Ortho.DEG	RNA.distinct	ATAC.distinct
TraesCS1D02G222600	C1	Ortho.DEG	RNA.distinct	ATAC.distinct
TraesCS1D02G223600	C1	Ortho.DEG	RNA.similar	ATAC.distinct
TraesCS1D02G224100	C6	Ortho.DEG	RNA.distinct	ATAC.distinct
TraesCS1D02G224900	C1	Ortho.DEG	RNA.distinct	ATAC.distinct
TraesCS1D02G225400	C5	Ortho.DEG	RNA.similar	ATAC.similar
TraesCS1D02G226600	C1	Ortho.DEG	RNA.distinct	ATAC.distinct
TraesCS1D02G226800	C6	Ortho.DEG	RNA.similar	ATAC.distinct
TraesCS1D02G227500	C6	Ortho.DEG	RNA.similar	ATAC.distinct
TraesCS1D02G228400	C6	Ortho.DEG	RNA.similar	ATAC.distinct
TraesCS1D02G228900	C1	Ortho.DEG	RNA.similar	ATAC.distinct
TraesCS1D02G229400	C6	Ortho.DEG	RNA.similar	ATAC.distinct
TraesCS1D02G229600	C5	Ortho.DEG	RNA.distinct	ATAC.distinct
TraesCS1D02G230000	C1	Ortho.DEG	RNA.similar	ATAC.similar
TraesCS1D02G230100	C5	Ortho.DEG	RNA.distinct	ATAC.similar
TraesCS1D02G230900	C3	Ortho.DEG	RNA.distinct	ATAC.distinct
TraesCS1D02G231500	C1	Ortho.DEG	RNA.distinct	ATAC.distinct
TraesCS1D02G231600	C1	Ortho.DEG	RNA.distinct	ATAC.distinct
TraesCS1D02G231700	C5	Ortho.DEG	RNA.distinct	ATAC.distinct
TraesCS1D02G233100	C5	Ortho.DEG	RNA.distinct	ATAC.distinct
TraesCS1D02G233300	C1	Ortho.DEG	RNA.similar	ATAC.distinct
TraesCS1D02G233500	C5	Ortho.DEG	RNA.distinct	ATAC.distinct
TraesCS1D02G235200	C6	Ortho.DEG	RNA.similar	ATAC.distinct
TraesCS1D02G235900	C3	Ortho.DEG	RNA.distinct	ATAC.distinct
TraesCS1D02G236000	C3	Ortho.DEG	RNA.distinct	ATAC.distinct
TraesCS1D02G236300	C2	Ortho.DEG	RNA.distinct	ATAC.similar
TraesCS1D02G236900	C2	Ortho.DEG	RNA.similar	ATAC.similar
TraesCS1D02G237900	C2	Ortho.DEG	RNA.distinct	ATAC.distinct
TraesCS1D02G238100	C2	Ortho.DEG	RNA.distinct	ATAC.similar
TraesCS1D02G238200	C5	Ortho.DEG	RNA.distinct	ATAC.similar
TraesCS1D02G239100	C3	Ortho.DEG	RNA.distinct	ATAC.distinct
TraesCS1D02G240400	C1	Ortho.DEG	RNA.distinct	ATAC.similar
TraesCS1D02G241000	C4	Ortho.DEG	RNA.distinct	ATAC.distinct
TraesCS1D02G241600	C5	Ortho.DEG	RNA.similar	ATAC.similar
TraesCS1D02G241800	C4	Ortho.DEG	RNA.similar	ATAC.distinct
TraesCS1D02G242400	C1	Ortho.DEG	RNA.distinct	ATAC.distinct
TraesCS1D02G242500	C1	Ortho.DEG	RNA.similar	ATAC.similar
TraesCS1D02G244100	C6	Ortho.DEG	RNA.distinct	ATAC.similar
TraesCS1D02G244300	C5	Ortho.DEG	RNA.distinct	ATAC.distinct
TraesCS1D02G244500	C5	Ortho.DEG	RNA.distinct	ATAC.distinct
TraesCS1D02G246400	C6	Ortho.DEG	RNA.similar	ATAC.distinct
TraesCS1D02G246700	C1	Ortho.DEG	RNA.distinct	ATAC.distinct
TraesCS1D02G248400	C6	Ortho.DEG	RNA.distinct	ATAC.distinct
TraesCS1D02G248600	C2	Ortho.DEG	RNA.distinct	ATAC.similar
TraesCS1D02G248800	C2	Ortho.DEG	RNA.distinct	ATAC.distinct
TraesCS1D02G248900	C4	Ortho.DEG	RNA.distinct	ATAC.distinct
TraesCS1D02G249100	C6	Ortho.DEG	RNA.similar	ATAC.distinct
TraesCS1D02G249300	C4	Ortho.DEG	RNA.similar	ATAC.distinct
TraesCS1D02G249700	C1	Ortho.DEG	RNA.similar	ATAC.distinct
TraesCS1D02G249900	C5	Ortho.DEG	RNA.distinct	ATAC.distinct
TraesCS1D02G250600	C4	Ortho.DEG	RNA.distinct	ATAC.distinct
TraesCS1D02G250700	C6	Ortho.DEG	RNA.distinct	ATAC.distinct
TraesCS1D02G250900	C5	Ortho.DEG	RNA.similar	ATAC.distinct
TraesCS1D02G251600	C5	Ortho.DEG	RNA.distinct	ATAC.distinct
TraesCS1D02G252900	C1	Ortho.DEG	RNA.similar	ATAC.distinct
TraesCS1D02G253700	C3	Ortho.DEG	RNA.distinct	ATAC.distinct
TraesCS1D02G254100	C6	Ortho.DEG	RNA.distinct	ATAC.distinct
TraesCS1D02G254200	C4	Ortho.DEG	RNA.distinct	ATAC.distinct
TraesCS1D02G254400	C3	Ortho.DEG	RNA.distinct	ATAC.distinct
TraesCS1D02G254500	C4	Ortho.DEG	RNA.distinct	ATAC.similar
TraesCS1D02G254900	C2	Ortho.DEG	RNA.distinct	ATAC.distinct
TraesCS1D02G255100	C5	Ortho.DEG	RNA.distinct	ATAC.distinct
TraesCS1D02G255300	C5	Ortho.DEG	RNA.distinct	ATAC.distinct
TraesCS1D02G256000	C1	Ortho.DEG	RNA.distinct	ATAC.distinct
TraesCS1D02G256500	C5	Ortho.DEG	RNA.distinct	ATAC.distinct
TraesCS1D02G257700	C4	Ortho.DEG	RNA.distinct	ATAC.distinct
TraesCS1D02G258900	C5	Ortho.DEG	RNA.distinct	ATAC.similar
TraesCS1D02G259000	C1	Ortho.DEG	RNA.similar	ATAC.distinct
TraesCS1D02G259400	C5	Ortho.DEG	RNA.distinct	ATAC.distinct
TraesCS1D02G259600	C5	Ortho.DEG	RNA.similar	ATAC.distinct
TraesCS1D02G260100	C5	Ortho.DEG	RNA.distinct	ATAC.distinct
TraesCS1D02G260500	C1	Ortho.DEG	RNA.distinct	ATAC.distinct
TraesCS1D02G261300	C5	Ortho.DEG	RNA.distinct	ATAC.distinct
TraesCS1D02G261400	C1	Ortho.DEG	RNA.similar	ATAC.distinct
TraesCS1D02G262100	C1	Ortho.DEG	RNA.similar	ATAC.distinct
TraesCS1D02G262500	C4	Ortho.DEG	RNA.distinct	ATAC.distinct
TraesCS1D02G262800	C5	Ortho.DEG	RNA.distinct	ATAC.distinct
TraesCS1D02G263200	C1	Ortho.DEG	RNA.similar	ATAC.distinct
TraesCS1D02G263400	C5	Ortho.DEG	RNA.distinct	ATAC.distinct
TraesCS1D02G263500	C3	Ortho.DEG	RNA.similar	ATAC.distinct
TraesCS1D02G263800	C5	Ortho.DEG	RNA.distinct	ATAC.distinct
TraesCS1D02G264500	C1	Ortho.DEG	RNA.distinct	ATAC.distinct
TraesCS1D02G264700	C1	Ortho.DEG	RNA.distinct	ATAC.distinct
TraesCS1D02G265000	C2	Ortho.DEG	RNA.similar	ATAC.distinct
TraesCS1D02G265100	C2	Ortho.DEG	RNA.distinct	ATAC.similar
TraesCS1D02G266200	C3	Ortho.DEG	RNA.distinct	ATAC.distinct
TraesCS1D02G266500	C6	Ortho.DEG	RNA.distinct	ATAC.distinct
TraesCS1D02G267700	C1	Ortho.DEG	RNA.distinct	ATAC.distinct
TraesCS1D02G268500	C4	Ortho.DEG	RNA.distinct	ATAC.distinct
TraesCS1D02G269400	C6	Ortho.DEG	RNA.similar	ATAC.distinct
TraesCS1D02G270500	C5	Ortho.DEG	RNA.distinct	ATAC.similar
TraesCS1D02G272600	C5	Ortho.DEG	RNA.distinct	ATAC.similar
TraesCS1D02G272700	C5	Ortho.DEG	RNA.distinct	ATAC.distinct
TraesCS1D02G273200	C1	Ortho.DEG	RNA.similar	ATAC.similar
TraesCS1D02G273500	C1	Ortho.DEG	RNA.distinct	ATAC.distinct
TraesCS1D02G274000	C3	Ortho.DEG	RNA.distinct	ATAC.similar
TraesCS1D02G274200	C3	Ortho.DEG	RNA.distinct	ATAC.similar
TraesCS1D02G274600	C4	Ortho.DEG	RNA.distinct	ATAC.similar
TraesCS1D02G274800	C1	Ortho.DEG	RNA.similar	ATAC.distinct
TraesCS1D02G275000	C4	Ortho.DEG	RNA.distinct	ATAC.similar
TraesCS1D02G276600	C1	Ortho.DEG	RNA.similar	ATAC.distinct
TraesCS1D02G277300	C1	Ortho.DEG	RNA.distinct	ATAC.distinct
TraesCS1D02G277400	C1	Ortho.DEG	RNA.similar	ATAC.distinct
TraesCS1D02G278300	C1	Ortho.DEG	RNA.distinct	ATAC.distinct
TraesCS1D02G278600	C6	Ortho.DEG	RNA.similar	ATAC.similar
TraesCS1D02G279000	C5	Ortho.DEG	RNA.distinct	ATAC.similar
TraesCS1D02G279700	C1	Ortho.DEG	RNA.similar	ATAC.distinct
TraesCS1D02G280400	C3	Ortho.DEG	RNA.similar	ATAC.distinct
TraesCS1D02G280600	C6	Ortho.DEG	RNA.similar	ATAC.distinct
TraesCS1D02G280900	C5	Ortho.DEG	RNA.similar	ATAC.distinct
TraesCS1D02G281100	C4	Ortho.DEG	RNA.distinct	ATAC.distinct
TraesCS1D02G281300	C3	Ortho.DEG	RNA.similar	ATAC.similar
TraesCS1D02G281800	C1	Ortho.DEG	RNA.distinct	ATAC.similar
TraesCS1D02G281900	C5	Ortho.DEG	RNA.distinct	ATAC.distinct
TraesCS1D02G282700	C4	Ortho.DEG	RNA.distinct	ATAC.distinct
TraesCS1D02G283300	C1	Ortho.DEG	RNA.distinct	ATAC.distinct
TraesCS1D02G284000	C1	Ortho.DEG	RNA.similar	ATAC.distinct
TraesCS1D02G284300	C2	Ortho.DEG	RNA.distinct	ATAC.similar
TraesCS1D02G285300	C5	Ortho.DEG	RNA.distinct	ATAC.similar
TraesCS1D02G286400	C5	Ortho.DEG	RNA.similar	ATAC.distinct
TraesCS1D02G286700	C1	Ortho.DEG	RNA.distinct	ATAC.distinct
TraesCS1D02G290200	C1	Ortho.DEG	RNA.distinct	ATAC.distinct
TraesCS1D02G292100	C5	Ortho.DEG	RNA.distinct	ATAC.distinct
TraesCS1D02G292600	C1	Ortho.DEG	RNA.similar	ATAC.distinct
TraesCS1D02G292700	C6	Ortho.DEG	RNA.distinct	ATAC.distinct
TraesCS1D02G293000	C1	Ortho.DEG	RNA.similar	ATAC.distinct
TraesCS1D02G293400	C1	Ortho.DEG	RNA.similar	ATAC.similar
TraesCS1D02G293600	C1	Ortho.DEG	RNA.distinct	ATAC.similar
TraesCS1D02G293900	C2	Ortho.DEG	RNA.distinct	ATAC.distinct
TraesCS1D02G294000	C2	Ortho.DEG	RNA.distinct	ATAC.distinct
TraesCS1D02G294500	C6	Ortho.DEG	RNA.distinct	ATAC.distinct
TraesCS1D02G295900	C4	Ortho.DEG	RNA.similar	ATAC.distinct
TraesCS1D02G296500	C1	Ortho.DEG	RNA.distinct	ATAC.distinct
TraesCS1D02G296600	C3	Ortho.DEG	RNA.distinct	ATAC.similar
TraesCS1D02G299400	C1	Ortho.DEG	RNA.similar	ATAC.similar
TraesCS1D02G302100	C2	Ortho.DEG	RNA.similar	ATAC.distinct
TraesCS1D02G302200	C6	Ortho.DEG	RNA.distinct	ATAC.distinct
TraesCS1D02G302800	C2	Ortho.DEG	RNA.similar	ATAC.distinct
TraesCS1D02G303100	C4	Ortho.DEG	RNA.distinct	ATAC.distinct
TraesCS1D02G303700	C4	Ortho.DEG	RNA.distinct	ATAC.distinct
TraesCS1D02G305100	C4	Ortho.DEG	RNA.distinct	ATAC.distinct
TraesCS1D02G306000	C1	Ortho.DEG	RNA.distinct	ATAC.distinct
TraesCS1D02G306100	C2	Ortho.DEG	RNA.similar	ATAC.distinct
TraesCS1D02G306700	C6	Ortho.DEG	RNA.similar	ATAC.distinct
TraesCS1D02G307200	C1	Ortho.DEG	RNA.distinct	ATAC.distinct
TraesCS1D02G307500	C6	Ortho.DEG	RNA.distinct	ATAC.distinct
TraesCS1D02G307700	C1	Ortho.DEG	RNA.distinct	ATAC.similar
TraesCS1D02G307900	C4	Ortho.DEG	RNA.distinct	ATAC.distinct
TraesCS1D02G308200	C4	Ortho.DEG	RNA.distinct	ATAC.distinct
TraesCS1D02G308300	C2	Ortho.DEG	RNA.distinct	ATAC.distinct
TraesCS1D02G309300	C2	Ortho.DEG	RNA.distinct	ATAC.distinct
TraesCS1D02G309400	C2	Ortho.DEG	RNA.distinct	ATAC.distinct
TraesCS1D02G309700	C1	Ortho.DEG	RNA.distinct	ATAC.distinct
TraesCS1D02G310000	C1	Ortho.DEG	RNA.distinct	ATAC.distinct
TraesCS1D02G310100	C3	Ortho.DEG	RNA.distinct	ATAC.distinct
TraesCS1D02G310300	C1	Ortho.DEG	RNA.similar	ATAC.similar
TraesCS1D02G310900	C5	Ortho.DEG	RNA.similar	ATAC.distinct
TraesCS1D02G312400	C6	Ortho.DEG	RNA.similar	ATAC.distinct
TraesCS1D02G312600	C4	Ortho.DEG	RNA.distinct	ATAC.distinct
TraesCS1D02G314600	C2	Ortho.DEG	RNA.distinct	ATAC.distinct
TraesCS1D02G314800	C1	Ortho.DEG	RNA.similar	ATAC.distinct
TraesCS1D02G315700	C2	Ortho.DEG	RNA.distinct	ATAC.distinct
TraesCS1D02G319400	C5	Ortho.DEG	RNA.distinct	ATAC.distinct
TraesCS1D02G319700	C1	Ortho.DEG	RNA.distinct	ATAC.distinct
TraesCS1D02G320300	C5	Ortho.DEG	RNA.distinct	ATAC.distinct
TraesCS1D02G321000	C4	Ortho.DEG	RNA.distinct	ATAC.distinct
TraesCS1D02G321100	C1	Ortho.DEG	RNA.similar	ATAC.distinct
TraesCS1D02G322100	C5	Ortho.DEG	RNA.distinct	ATAC.similar
TraesCS1D02G322400	C1	Ortho.DEG	RNA.distinct	ATAC.distinct
TraesCS1D02G323100	C6	Ortho.DEG	RNA.similar	ATAC.similar
TraesCS1D02G324200	C5	Ortho.DEG	RNA.distinct	ATAC.distinct
TraesCS1D02G324400	C2	Ortho.DEG	RNA.distinct	ATAC.distinct
TraesCS1D02G325300	C6	Ortho.DEG	RNA.similar	ATAC.distinct
TraesCS1D02G327000	C6	Ortho.DEG	RNA.distinct	ATAC.distinct
TraesCS1D02G327600	C5	Ortho.DEG	RNA.distinct	ATAC.distinct
TraesCS1D02G330600	C3	Ortho.DEG	RNA.distinct	ATAC.distinct
TraesCS1D02G331000	C4	Ortho.DEG	RNA.distinct	ATAC.distinct
TraesCS1D02G331400	C4	Ortho.DEG	RNA.distinct	ATAC.distinct
TraesCS1D02G332500	C1	Ortho.DEG	RNA.similar	ATAC.distinct
TraesCS1D02G332700	C1	Ortho.DEG	RNA.similar	ATAC.similar
TraesCS1D02G332800	C6	Ortho.DEG	RNA.distinct	ATAC.distinct
TraesCS1D02G333200	C2	Ortho.DEG	RNA.distinct	ATAC.distinct
TraesCS1D02G333800	C3	Ortho.DEG	RNA.distinct	ATAC.distinct
TraesCS1D02G334400	C1	Ortho.DEG	RNA.distinct	ATAC.similar
TraesCS1D02G335500	C1	Ortho.DEG	RNA.similar	ATAC.distinct
TraesCS1D02G336000	C6	Ortho.DEG	RNA.similar	ATAC.distinct
TraesCS1D02G336200	C2	Ortho.DEG	RNA.distinct	ATAC.similar
TraesCS1D02G336400	C4	Ortho.DEG	RNA.distinct	ATAC.similar
TraesCS1D02G337400	C5	Ortho.DEG	RNA.similar	ATAC.distinct
TraesCS1D02G339700	C5	Ortho.DEG	RNA.distinct	ATAC.similar
TraesCS1D02G340400	C1	Ortho.DEG	RNA.similar	ATAC.distinct
TraesCS1D02G340500	C5	Ortho.DEG	RNA.distinct	ATAC.distinct
TraesCS1D02G342000	C6	Ortho.DEG	RNA.similar	ATAC.distinct
TraesCS1D02G342400	C6	Ortho.DEG	RNA.similar	ATAC.similar
TraesCS1D02G343400	C1	Ortho.DEG	RNA.distinct	ATAC.distinct
TraesCS1D02G344100	C1	Ortho.DEG	RNA.distinct	ATAC.distinct
TraesCS1D02G344600	C5	Ortho.DEG	RNA.distinct	ATAC.similar
TraesCS1D02G344800	C5	Ortho.DEG	RNA.similar	ATAC.distinct
TraesCS1D02G344900	C5	Ortho.DEG	RNA.distinct	ATAC.similar
TraesCS1D02G345100	C3	Ortho.DEG	RNA.distinct	ATAC.similar
TraesCS1D02G345200	C3	Ortho.DEG	RNA.similar	ATAC.distinct
TraesCS1D02G345600	C6	Ortho.DEG	RNA.similar	ATAC.distinct
TraesCS1D02G346200	C1	Ortho.DEG	RNA.similar	ATAC.distinct
TraesCS1D02G348500	C1	Ortho.DEG	RNA.distinct	ATAC.distinct
TraesCS1D02G349200	C1	Ortho.DEG	RNA.distinct	ATAC.distinct
TraesCS1D02G349700	C1	Ortho.DEG	RNA.similar	ATAC.distinct
TraesCS1D02G351300	C5	Ortho.DEG	RNA.distinct	ATAC.distinct
TraesCS1D02G351800	C6	Ortho.DEG	RNA.similar	ATAC.distinct
TraesCS1D02G352200	C1	Ortho.DEG	RNA.distinct	ATAC.distinct
TraesCS1D02G352300	C1	Ortho.DEG	RNA.distinct	ATAC.distinct
TraesCS1D02G352600	C3	Ortho.DEG	RNA.distinct	ATAC.distinct
TraesCS1D02G353400	C5	Ortho.DEG	RNA.distinct	ATAC.similar
TraesCS1D02G353700	C5	Ortho.DEG	RNA.similar	ATAC.distinct
TraesCS1D02G354900	C1	Ortho.DEG	RNA.similar	ATAC.distinct
TraesCS1D02G357200	C5	Ortho.DEG	RNA.distinct	ATAC.distinct
TraesCS1D02G358500	C1	Ortho.DEG	RNA.similar	ATAC.distinct
TraesCS1D02G359100	C1	Ortho.DEG	RNA.similar	ATAC.distinct
TraesCS1D02G360700	C4	Ortho.DEG	RNA.distinct	ATAC.similar
TraesCS1D02G361000	C3	Ortho.DEG	RNA.distinct	ATAC.distinct
TraesCS1D02G361500	C3	Ortho.DEG	RNA.distinct	ATAC.similar
TraesCS1D02G361700	C4	Ortho.DEG	RNA.distinct	ATAC.distinct
TraesCS1D02G362900	C1	Ortho.DEG	RNA.distinct	ATAC.distinct
TraesCS1D02G363300	C1	Ortho.DEG	RNA.distinct	ATAC.distinct
TraesCS1D02G363900	C1	Ortho.DEG	RNA.similar	ATAC.distinct
TraesCS1D02G364400	C1	Ortho.DEG	RNA.distinct	ATAC.distinct
TraesCS1D02G364900	C5	Ortho.DEG	RNA.distinct	ATAC.distinct
TraesCS1D02G365100	C2	Ortho.DEG	RNA.similar	ATAC.similar
TraesCS1D02G365400	C1	Ortho.DEG	RNA.similar	ATAC.distinct
TraesCS1D02G366300	C2	Ortho.DEG	RNA.distinct	ATAC.similar
TraesCS1D02G366700	C1	Ortho.DEG	RNA.similar	ATAC.distinct
TraesCS1D02G366800	C1	Ortho.DEG	RNA.distinct	ATAC.distinct
TraesCS1D02G367300	C2	Ortho.DEG	RNA.distinct	ATAC.similar
TraesCS1D02G367400	C5	Ortho.DEG	RNA.distinct	ATAC.distinct
TraesCS1D02G367700	C1	Ortho.DEG	RNA.distinct	ATAC.similar
TraesCS1D02G368100	C1	Ortho.DEG	RNA.similar	ATAC.distinct
TraesCS1D02G368900	C3	Ortho.DEG	RNA.distinct	ATAC.distinct
TraesCS1D02G372000	C1	Ortho.DEG	RNA.similar	ATAC.distinct
TraesCS1D02G372100	C5	Ortho.DEG	RNA.distinct	ATAC.distinct
TraesCS1D02G372200	C1	Ortho.DEG	RNA.similar	ATAC.distinct
TraesCS1D02G372300	C3	Ortho.DEG	RNA.distinct	ATAC.distinct
TraesCS1D02G372400	C1	Ortho.DEG	RNA.similar	ATAC.similar
TraesCS1D02G372500	C1	Ortho.DEG	RNA.similar	ATAC.similar
TraesCS1D02G372600	C1	Ortho.DEG	RNA.similar	ATAC.similar
TraesCS1D02G372700	C1	Ortho.DEG	RNA.similar	ATAC.similar
TraesCS1D02G372800	C1	Ortho.DEG	RNA.similar	ATAC.similar
TraesCS1D02G372900	C1	Ortho.DEG	RNA.similar	ATAC.similar
TraesCS1D02G373100	C6	Ortho.DEG	RNA.similar	ATAC.distinct
TraesCS1D02G373800	C1	Ortho.DEG	RNA.similar	ATAC.similar
TraesCS1D02G373900	C2	Ortho.DEG	RNA.distinct	ATAC.similar
TraesCS1D02G375700	C1	Ortho.DEG	RNA.distinct	ATAC.similar
TraesCS1D02G375800	C1	Ortho.DEG	RNA.similar	ATAC.distinct
TraesCS1D02G376200	C4	Ortho.DEG	RNA.distinct	ATAC.distinct
TraesCS1D02G376300	C2	Ortho.DEG	RNA.distinct	ATAC.distinct
TraesCS1D02G376500	C1	Ortho.DEG	RNA.similar	ATAC.similar
TraesCS1D02G376600	C1	Ortho.DEG	RNA.similar	ATAC.similar
TraesCS1D02G376800	C1	Ortho.DEG	RNA.similar	ATAC.similar
TraesCS1D02G378600	C1	Ortho.DEG	RNA.distinct	ATAC.similar
TraesCS1D02G378800	C4	Ortho.DEG	RNA.distinct	ATAC.similar
TraesCS1D02G378900	C6	Ortho.DEG	RNA.similar	ATAC.distinct
TraesCS1D02G379000	C5	Ortho.DEG	RNA.distinct	ATAC.distinct
TraesCS1D02G380000	C4	Ortho.DEG	RNA.distinct	ATAC.distinct
TraesCS1D02G380400	C5	Ortho.DEG	RNA.distinct	ATAC.distinct
TraesCS1D02G381700	C2	Ortho.DEG	RNA.similar	ATAC.distinct
TraesCS1D02G382400	C1	Ortho.DEG	RNA.similar	ATAC.distinct
TraesCS1D02G382900	C1	Ortho.DEG	RNA.similar	ATAC.similar
TraesCS1D02G383600	C1	Ortho.DEG	RNA.distinct	ATAC.similar
TraesCS1D02G385000	C5	Ortho.DEG	RNA.distinct	ATAC.distinct
TraesCS1D02G385200	C6	Ortho.DEG	RNA.distinct	ATAC.distinct
TraesCS1D02G386100	C2	Ortho.DEG	RNA.distinct	ATAC.distinct
TraesCS1D02G386800	C1	Ortho.DEG	RNA.similar	ATAC.similar
TraesCS1D02G387000	C5	Ortho.DEG	RNA.distinct	ATAC.distinct
TraesCS1D02G388600	C5	Ortho.DEG	RNA.similar	ATAC.similar
TraesCS1D02G389500	C4	Ortho.DEG	RNA.similar	ATAC.distinct
TraesCS1D02G392300	C6	Ortho.DEG	RNA.distinct	ATAC.distinct
TraesCS1D02G393500	C5	Ortho.DEG	RNA.distinct	ATAC.distinct
TraesCS1D02G394400	C3	Ortho.DEG	RNA.distinct	ATAC.distinct
TraesCS1D02G394500	C1	Ortho.DEG	RNA.distinct	ATAC.distinct
TraesCS1D02G395200	C1	Ortho.DEG	RNA.distinct	ATAC.distinct
TraesCS1D02G396300	C3	Ortho.DEG	RNA.distinct	ATAC.distinct
TraesCS1D02G396600	C2	Ortho.DEG	RNA.distinct	ATAC.similar
TraesCS1D02G396900	C5	Ortho.DEG	RNA.distinct	ATAC.distinct
TraesCS1D02G397000	C5	Ortho.DEG	RNA.distinct	ATAC.distinct
TraesCS1D02G397100	C6	Ortho.DEG	RNA.similar	ATAC.distinct
TraesCS1D02G397400	C2	Ortho.DEG	RNA.distinct	ATAC.similar
TraesCS1D02G397500	C6	Ortho.DEG	RNA.similar	ATAC.similar
TraesCS1D02G398400	C4	Ortho.DEG	RNA.distinct	ATAC.distinct
TraesCS1D02G398600	C1	Ortho.DEG	RNA.similar	ATAC.distinct
TraesCS1D02G400000	C5	Ortho.DEG	RNA.distinct	ATAC.distinct
TraesCS1D02G401900	C4	Ortho.DEG	RNA.distinct	ATAC.similar
TraesCS1D02G402000	C1	Ortho.DEG	RNA.similar	ATAC.distinct
TraesCS1D02G403800	C3	Ortho.DEG	RNA.distinct	ATAC.similar
TraesCS1D02G404400	C2	Ortho.DEG	RNA.distinct	ATAC.distinct
TraesCS1D02G404500	C4	Ortho.DEG	RNA.distinct	ATAC.distinct
TraesCS1D02G404600	C3	Ortho.DEG	RNA.distinct	ATAC.similar
TraesCS1D02G404700	C3	Ortho.DEG	RNA.distinct	ATAC.similar
TraesCS1D02G404800	C1	Ortho.DEG	RNA.similar	ATAC.distinct
TraesCS1D02G405200	C1	Ortho.DEG	RNA.similar	ATAC.similar
TraesCS1D02G405400	C6	Ortho.DEG	RNA.distinct	ATAC.distinct
TraesCS1D02G405800	C1	Ortho.DEG	RNA.similar	ATAC.distinct
TraesCS1D02G407300	C6	Ortho.DEG	RNA.distinct	ATAC.distinct
TraesCS1D02G407600	C5	Ortho.DEG	RNA.distinct	ATAC.distinct
TraesCS1D02G408000	C4	Ortho.DEG	RNA.distinct	ATAC.distinct
TraesCS1D02G408400	C5	Ortho.DEG	RNA.distinct	ATAC.distinct
TraesCS1D02G409700	C4	Ortho.DEG	RNA.distinct	ATAC.distinct
TraesCS1D02G411000	C4	Ortho.DEG	RNA.distinct	ATAC.similar
TraesCS1D02G412200	C1	Ortho.DEG	RNA.distinct	ATAC.distinct
TraesCS1D02G415900	C6	Ortho.DEG	RNA.distinct	ATAC.distinct
TraesCS1D02G416000	C1	Ortho.DEG	RNA.similar	ATAC.distinct
TraesCS1D02G417300	C2	Ortho.DEG	RNA.distinct	ATAC.distinct
TraesCS1D02G418400	C1	Ortho.DEG	RNA.similar	ATAC.distinct
TraesCS1D02G418500	C1	Ortho.DEG	RNA.similar	ATAC.distinct
TraesCS1D02G418700	C1	Ortho.DEG	RNA.similar	ATAC.distinct
TraesCS1D02G418900	C5	Ortho.DEG	RNA.distinct	ATAC.distinct
TraesCS1D02G419500	C1	Ortho.DEG	RNA.similar	ATAC.distinct
TraesCS1D02G419900	C2	Ortho.DEG	RNA.similar	ATAC.distinct
TraesCS1D02G420500	C1	Ortho.DEG	RNA.distinct	ATAC.distinct
TraesCS1D02G421800	C1	Ortho.DEG	RNA.distinct	ATAC.distinct
TraesCS1D02G423200	C5	Ortho.DEG	RNA.distinct	ATAC.distinct
TraesCS1D02G423500	C3	Ortho.DEG	RNA.distinct	ATAC.distinct
TraesCS1D02G423800	C1	Ortho.DEG	RNA.distinct	ATAC.distinct
TraesCS1D02G424500	C1	Ortho.DEG	RNA.similar	ATAC.distinct
TraesCS1D02G425400	C4	Ortho.DEG	RNA.distinct	ATAC.distinct
TraesCS1D02G425600	C3	Ortho.DEG	RNA.distinct	ATAC.distinct
TraesCS1D02G426000	C5	Ortho.DEG	RNA.distinct	ATAC.distinct
TraesCS1D02G427400	C1	Ortho.DEG	RNA.distinct	ATAC.similar
TraesCS1D02G427500	C2	Ortho.DEG	RNA.similar	ATAC.distinct
TraesCS1D02G427800	C1	Ortho.DEG	RNA.distinct	ATAC.distinct
TraesCS1D02G428600	C1	Ortho.DEG	RNA.similar	ATAC.distinct
TraesCS1D02G428700	C5	Ortho.DEG	RNA.similar	ATAC.distinct
TraesCS1D02G428800	C3	Ortho.DEG	RNA.similar	ATAC.similar
TraesCS1D02G429800	C3	Ortho.DEG	RNA.similar	ATAC.distinct
TraesCS1D02G429900	C3	Ortho.DEG	RNA.similar	ATAC.distinct
TraesCS1D02G431700	C4	Ortho.DEG	RNA.distinct	ATAC.distinct
TraesCS1D02G432400	C1	Ortho.DEG	RNA.similar	ATAC.similar
TraesCS1D02G433300	C1	Ortho.DEG	RNA.distinct	ATAC.distinct
TraesCS1D02G433600	C3	Ortho.DEG	RNA.distinct	ATAC.distinct
TraesCS1D02G434100	C1	Ortho.DEG	RNA.distinct	ATAC.distinct
TraesCS1D02G434200	C1	Ortho.DEG	RNA.similar	ATAC.distinct
TraesCS1D02G434300	C3	Ortho.DEG	RNA.distinct	ATAC.distinct
TraesCS1D02G437100	C1	Ortho.DEG	RNA.distinct	ATAC.similar
TraesCS1D02G437700	C5	Ortho.DEG	RNA.distinct	ATAC.distinct
TraesCS1D02G439100	C3	Ortho.DEG	RNA.similar	ATAC.distinct
TraesCS1D02G439200	C5	Ortho.DEG	RNA.distinct	ATAC.distinct
TraesCS1D02G439300	C5	Ortho.DEG	RNA.distinct	ATAC.distinct
TraesCS1D02G439400	C3	Ortho.DEG	RNA.similar	ATAC.distinct
TraesCS1D02G439800	C6	Ortho.DEG	RNA.similar	ATAC.distinct
TraesCS1D02G440600	C1	Ortho.DEG	RNA.distinct	ATAC.similar
TraesCS1D02G442500	C1	Ortho.DEG	RNA.distinct	ATAC.distinct
TraesCS1D02G443200	C3	Ortho.DEG	RNA.distinct	ATAC.distinct
TraesCS1D02G449200	C5	Ortho.DEG	RNA.distinct	ATAC.distinct
TraesCS1D02G449600	C6	Ortho.DEG	RNA.distinct	ATAC.distinct
TraesCS1D02G449700	C6	Ortho.DEG	RNA.distinct	ATAC.distinct
TraesCS1D02G450900	C6	Ortho.DEG	RNA.distinct	ATAC.distinct
TraesCS1D02G451900	C1	Ortho.DEG	RNA.similar	ATAC.similar
TraesCS1D02G452300	C5	Ortho.DEG	RNA.distinct	ATAC.distinct
TraesCS1D02G453100	C6	Ortho.DEG	RNA.similar	ATAC.distinct
TraesCS1D02G453600	C4	Ortho.DEG	RNA.distinct	ATAC.distinct
TraesCS1D02G453700	C5	Ortho.DEG	RNA.distinct	ATAC.distinct
TraesCS1D02G453900	C4	Ortho.DEG	RNA.similar	ATAC.distinct
TraesCS2A02G004800	C6	Ortho.DEG	RNA.similar	ATAC.distinct
TraesCS2A02G005200	C1	Ortho.DEG	RNA.distinct	ATAC.similar
TraesCS2A02G010200	C1	Ortho.DEG	RNA.similar	ATAC.distinct
TraesCS2A02G010900	C1	Ortho.DEG	RNA.distinct	ATAC.distinct
TraesCS2A02G011100	C4	Ortho.DEG	RNA.distinct	ATAC.distinct
TraesCS2A02G011500	C4	Ortho.DEG	RNA.similar	ATAC.distinct
TraesCS2A02G012900	C2	Ortho.DEG	RNA.similar	ATAC.similar
TraesCS2A02G013000	C2	Ortho.DEG	RNA.distinct	ATAC.distinct
TraesCS2A02G013200	C2	Ortho.DEG	RNA.distinct	ATAC.distinct
TraesCS2A02G013500	C6	Ortho.DEG	RNA.distinct	ATAC.distinct
TraesCS2A02G016500	C3	Ortho.DEG	RNA.distinct	ATAC.distinct
TraesCS2A02G022000	C4	Ortho.DEG	RNA.similar	ATAC.distinct
TraesCS2A02G023200	C3	Ortho.DEG	RNA.distinct	ATAC.distinct
TraesCS2A02G031800	C6	Ortho.DEG	RNA.similar	ATAC.distinct
TraesCS2A02G033700	C1	Ortho.DEG	RNA.similar	ATAC.distinct
TraesCS2A02G035600	C5	Ortho.DEG	RNA.distinct	ATAC.distinct
TraesCS2A02G036300	C1	Ortho.DEG	RNA.similar	ATAC.similar
TraesCS2A02G038000	C5	Ortho.DEG	RNA.distinct	ATAC.distinct
TraesCS2A02G041000	C5	Ortho.DEG	RNA.distinct	ATAC.distinct
TraesCS2A02G041100	C5	Ortho.DEG	RNA.distinct	ATAC.distinct
TraesCS2A02G042000	C4	Ortho.DEG	RNA.distinct	ATAC.distinct
TraesCS2A02G042100	C3	Ortho.DEG	RNA.distinct	ATAC.distinct
TraesCS2A02G042200	C3	Ortho.DEG	RNA.distinct	ATAC.distinct
[truncated: 32,054 more rows]

## Sheet: Table S21
Table S21. Classification of DEGs in Arabidopsis.
tairID	tairName	tair.cluster	CIM0d	CIM3d	CIM5d	CIM7d	deg.group
AT1G01030	NGA3	A6	0.0838478	0	0.647377	1.13707	Ortho.DEG
AT1G01040	DCL1	A2	30.6461	14.0623	17.5346	22.7735	Ortho.DEG
AT1G01046	MIR838A	A2	8.68029	2.87253	6.35502	6.30179	tair.spec
AT1G01060	LHY	A6	0.335817	4.30538	27.0972	27.8732	Ortho.DEG
AT1G01070	NA	A1	5.95806	0.801257	0.333702	0.24728	Ortho.DEG
AT1G01100	RPP1A	A4	128.763	866.461	974.384	906.264	Ortho.Not.DEG
AT1G01110	IQD18	A6	1.52458	9.10993	42.5107	47.0941	Ortho.DEG
AT1G01120	KCS1	A5	298.771	169.836	89.6528	74.4786	Ortho.DEG
AT1G01130	NA	A3	10.582	39.1926	25.2068	21.4913	tair.spec
AT1G01140	CIPK9	A1	60.9913	7.81635	1.87125	1.41888	Ortho.DEG
AT1G01170	NA	A1	40.9016	1.81443	5.36926	5.88695	tair.spec
AT1G01180	NA	A1	41.5591	3.62566	0.75491	1.20742	Ortho.DEG
AT1G01190	CYP78A8	A5	5.50066	4.93283	0.440034	0.47472	Ortho.DEG
AT1G01200	RABA3	A4	1.05462	6.05267	6.39297	6.62994	Ortho.DEG
AT1G01225	NA	A4	2.49432	27.45	22.6526	21.7616	Ortho.DEG
AT1G01240	NA	A5	36.2165	26.579	14.938	17.4177	tair.spec
AT1G01300	APF2	A4	60.5248	335.599	352.779	381.194	Ortho.DEG
AT1G01320	NA	A1	76.63	15.1957	18.7951	21.4474	Ortho.Not.DEG
AT1G01340	CNGC10	A3	6.60197	12.2807	3.20663	2.07149	Ortho.DEG
AT1G01355	NA	A1	2.45731	0.2812	0.0615282	0	Ortho.DEG
AT1G01360	PYL9	A2	37.3067	10.8703	21.401	25.8041	Ortho.DEG
AT1G01370	HTR12	A4	1.99999	18.7247	24.8208	22.3019	Ortho.DEG
AT1G01380	ETC1	A1	1.06314	0.0729126	0.0335821	0	tair.spec
AT1G01420	UGT72B3	A1	2.67656	0	0.0143823	0	Ortho.DEG
AT1G01430	TBL25	A1	75.3183	7.79908	8.15473	7.60737	Ortho.DEG
AT1G01440	NA	A1	43.0544	11.2953	14.243	16.0539	Ortho.DEG
AT1G01448	NA	A2	17.1887	5.33826	9.22173	10.9664	tair.spec
AT1G01470	LEA14	A1	691.222	152.037	13.1674	10.6288	Ortho.DEG
AT1G01480	ACS2	A3	9.18033	23.5942	4.39451	3.80647	tair.spec
AT1G01490	NA	A1	91.2668	33.9276	28.5243	31.3587	tair.spec
AT1G01500	NA	A1	21.5277	15.099	12.8476	12.2448	Ortho.DEG
AT1G01510	AN	A4	21.8932	73.014	88.8124	93.9531	Ortho.DEG
AT1G01550	BPS1	A5	388.11	265.685	150.135	134.652	Ortho.DEG
AT1G01560	MPK11	A3	2.20626	11.8854	4.08437	3.31219	tair.spec
AT1G01570	NA	A6	0.895527	2.39815	2.84155	3.95281	Ortho.DEG
AT1G01600	CYP86A4	A4	1.66871	15.4039	15.0458	11.8728	Ortho.DEG
AT1G01610	GPAT4	A4	33.8707	114.571	123.407	113.877	Ortho.Not.DEG
AT1G01620	PIP1-3	A1	2715.33	160.469	234.829	213.583	tair.spec
AT1G01630	NA	A4	19.9353	85.4274	71.0872	69.0197	Ortho.DEG
AT1G01640	NA	A1	81.9699	28.1684	9.81042	11.0367	Ortho.Not.DEG
AT1G01650	SPPL4	A1	56.8235	20.511	18.3259	18.9317	Ortho.Not.DEG
AT1G01660	NA	A6	0.0625231	0.965912	2.2201	4.42114	Ortho.Not.DEG
AT1G01670	PUB56	A6	0.278671	1.82485	3.64124	5.69101	Ortho.Not.DEG
AT1G01680	PUB54	A6	0.318641	0.578403	40.5985	54.527	Ortho.Not.DEG
AT1G01690	ATPRD3	A4	2.0689	25.1372	33.0351	33.6649	tair.spec
AT1G01695	NA	A6	0.395791	0.563877	0.7052	1.44883	tair.spec
AT1G01700	ATROPGEF2	A6	1.21864	2.68757	3.42321	3.57631	tair.spec
AT1G01715	NA	A4	4.56276	15.8029	19.8516	19.0909	tair.spec
AT1G01720	NAC002	A1	209.207	71.949	112.889	110.17	tair.spec
AT1G01725	NA	A1	8.18906	4.00845	4.8158	3.84086	tair.spec
AT1G01750	ADF11	A6	0.259661	0.686829	1.38715	1.34311	Ortho.Not.DEG
AT1G01770	NA	A1	73.1004	10.4726	19.5651	22.4106	Ortho.DEG
AT1G01780	PLIM2B	A1	76.5709	11.0832	15.6552	17.5521	tair.spec
AT1G01810	NA	A4	1.75908	6.4013	4.81062	3.95022	tair.spec
AT1G01820	PEX11C	A1	167.677	55.9065	61.9863	64.4491	Ortho.DEG
AT1G01880	GEN1	A4	2.45458	5.93503	7.15466	6.36619	Ortho.DEG
AT1G01900	SBTI1.1	A3	0.94548	3.46487	0.788598	0.535224	tair.spec
AT1G01920	NA	A6	11.4803	44.9212	61.8679	64.7476	Ortho.Not.DEG
AT1G01940	CYP18-1	A4	21.422	73.7679	80.194	79.6279	Ortho.Not.DEG
AT1G02000	GAE2	A5	31.1305	25.367	14.4352	17.6905	Ortho.DEG
AT1G02020	NA	A2	19.3977	9.95319	12.7937	14.2054	tair.spec
AT1G02030	ZAT1	A3	0.309321	1.84205	0.272102	0.251087	tair.spec
AT1G02050	PKSA	A6	10.2033	23.4401	32.1012	36.4978	Ortho.Not.DEG
AT1G02060	NA	A6	9.81172	18.5805	26.581	32.2867	Ortho.Not.DEG
AT1G02070	NA	A6	0.168461	1.42599	3.39908	6.9585	tair.spec
AT1G02090	CSN7	A4	29.1725	82.3321	84.2306	82.0673	Ortho.Not.DEG
AT1G02100	LCMT1	A1	132.667	63.0577	77.3125	80.6627	Ortho.Not.DEG
AT1G02110	NA	A6	22.1679	66.6466	106.549	113.692	Ortho.DEG
AT1G02120	VAD1	A1	94.3129	55.9417	64.5558	70.0473	tair.spec
AT1G02170	AMC1	A1	62.8243	35.813	35.88	34.6351	Ortho.DEG
AT1G02180	NA	A6	4.49188	11.8207	15.2964	16.8039	tair.spec
AT1G02205	CER1	A5	29.125	26.3552	2.54031	1.4976	Ortho.DEG
AT1G02220	NAC003	A4	1.85652	12.3029	10.7913	12.0215	tair.spec
AT1G02230	NAC004	A6	0.0538103	0.150477	0.840724	1.38969	tair.spec
AT1G02260	NA	A1	9.86896	5.60819	5.43026	6.30655	Ortho.Not.DEG
AT1G02270	NA	A1	36.5392	14.352	15.7948	17.0091	Ortho.Not.DEG
AT1G02280	TOC33	A1	65.1427	39.2848	43.2708	41.9347	Ortho.Not.DEG
AT1G02290	NA	A4	6.6124	26.5443	35.7001	37.2461	Ortho.DEG
AT1G02300	CATHB1	A1	20.1643	1.21715	2.43008	2.41628	Ortho.DEG
AT1G02305	CATHB2	A1	433.248	66.269	46.9844	46.2802	Ortho.DEG
AT1G02330	CSU2	A4	28.8447	93.6173	81.9378	84.5801	Ortho.Not.DEG
AT1G02335	GL22	A3	29.1648	106.094	14.715	5.85782	Ortho.DEG
AT1G02340	HFR1	A1	378.293	0.574468	0.48676	0.298867	Ortho.DEG
AT1G02350	NA	A4	1.4363	6.26584	9.23216	8.47417	tair.spec
AT1G02360	NA	A1	5.23873	2.01042	2.79493	2.43142	Ortho.DEG
AT1G02370	NA	A4	5.46626	32.9168	34.0098	35.898	Ortho.DEG
AT1G02380	NA	A4	2.33267	9.28599	11.4883	12.7541	tair.spec
AT1G02400	GA2OX6	A1	144.619	29.2184	12.9735	8.03391	tair.spec
AT1G02405	NA	A5	0.870516	1.05307	0.0345633	0.490516	tair.spec
AT1G02410	COX11	A4	11.2442	29.2921	35.3898	36.2086	Ortho.DEG
AT1G02450	NIMIN-1	A6	0.118941	0.103318	5.56656	9.0846	tair.spec
AT1G02470	NA	A3	3.18043	6.35658	3.14802	3.55392	Ortho.DEG
AT1G02475	NA	A1	24.2129	5.0526	6.90402	5.27825	Ortho.DEG
AT1G02490	NA	A4	0	1.5761	1.15516	1.26327	tair.spec
AT1G02520	ABCB11	A3	9.84124	59.171	28.3995	30.1749	Ortho.DEG
AT1G02530	ABCB12	A6	0.0949684	4.51511	6.47426	7.22308	Ortho.DEG
AT1G02610	NA	A1	19.8708	0.74915	0.449733	0.516191	Ortho.DEG
AT1G02620	NA	A1	1.4423	0.0225117	0	0	Ortho.DEG
AT1G02640	BXL2	A1	17.2273	3.79745	3.81871	2.70015	Ortho.DEG
AT1G02660	PLIP2	A1	161.015	8.78501	6.75861	5.9022	Ortho.DEG
AT1G02690	IMPA-6	A4	15.5334	128.558	117.242	107.486	Ortho.Not.DEG
AT1G02700	NA	A1	1.49878	0.0474682	0	0	tair.spec
AT1G02720	GATL5	A6	2.3648	6.85778	10.4542	13.0098	Ortho.DEG
AT1G02730	CSLD5	A4	9.25829	111.938	101.094	99.4282	Ortho.DEG
AT1G02740	MRG2	A4	13.3786	50.2679	38.5819	43.8604	Ortho.Not.DEG
AT1G02750	DI19-2	A5	28.6645	25.0119	13.719	13.6112	Ortho.Not.DEG
AT1G02770	NA	A1	2.08754	0.769895	0.127775	0.139547	tair.spec
AT1G02780	RPL19A	A4	349.37	2726.91	3010.93	2794.39	Ortho.DEG
AT1G02800	CEL2	A6	0.0135492	1.00861	4.33094	4.8706	Ortho.DEG
AT1G02810	PME7	A6	12.4745	59.4435	123.9	113.048	Ortho.Not.DEG
AT1G02816	NA	A1	37.8242	19.0716	17.2421	15.325	Ortho.DEG
AT1G02820	LEA2	A3	0.560341	1.80267	1.10429	0.420899	tair.spec
AT1G02850	BGLU11	A4	72.3969	279.614	265.458	261.14	Ortho.Not.DEG
AT1G02860	BAH1	A5	208.456	181.807	26.7439	17.0201	Ortho.DEG
AT1G02870	NA	A4	28.1583	172.287	192.408	181.571	Ortho.DEG
AT1G02900	RALF1	A5	67.4609	41.2633	18.2094	9.27462	tair.spec
AT1G02910	LPA1	A1	33.1397	14.1822	15.4817	17.1374	Ortho.Not.DEG
AT1G02920	GSTF7	A3	44.8563	86.7994	28.7087	25.2572	tair.spec
AT1G02930	GSTF6	A5	22.2732	21.86	14.9324	12.8489	tair.spec
AT1G02950	ATGSTF4	A1	18.4473	1.72045	2.24849	1.01496	tair.spec
AT1G02970	WEE1	A4	1.30423	14.3526	17.8841	17.3737	Ortho.DEG
AT1G03010	NA	A6	1.18143	3.04567	7.85066	10.1249	Ortho.Not.DEG
AT1G03030	NA	A6	9.75901	17.6888	32.7018	31.5839	Ortho.DEG
AT1G03070	LFG4	A5	4.30901	3.0541	1.03936	0.736329	Ortho.DEG
AT1G03080	NET1D	A1	119.304	30.6895	28.1171	31.0999	Ortho.DEG
AT1G03090	MCCA	A1	444.452	13.4995	26.5144	29.1481	Ortho.Not.DEG
AT1G03106	NA	A1	4.43299	0.0333337	0	0	tair.spec
AT1G03110	TRM82	A4	6.0755	77.4984	71.4825	69.5828	Ortho.Not.DEG
AT1G03130	PSAD2	A1	42.2909	2.21541	1.72189	1.84262	Ortho.Not.DEG
AT1G03160	FZL	A1	25.1517	9.89103	12.7943	14.3086	Ortho.Not.DEG
AT1G03170	FAF2	A1	1.2716	0.175535	0.188724	0.222931	tair.spec
AT1G03180	NA	A4	2.74104	10.9985	10.5947	13.4617	Ortho.DEG
AT1G03200	NA	A1	17.6032	9.0164	7.6362	7.16404	tair.spec
AT1G03220	NA	A1	865.031	243.277	391.028	373.876	tair.spec
AT1G03230	NA	A6	20.6549	72.7193	158.251	174.218	tair.spec
AT1G03240	NA	A4	0.649481	2.73709	3.14141	2.04295	tair.spec
AT1G03270	CBSDUF4	A6	0.936485	10.9324	20.7707	21.949	Ortho.DEG
AT1G03290	NA	A1	30.303	11.39	12.0411	13.3996	Ortho.DEG
AT1G03310	ISA2	A6	2.30605	6.61838	10.33	11.9879	Ortho.DEG
AT1G03330	LSM2	A4	32.0879	78.2726	95.2759	95.2055	Ortho.Not.DEG
AT1G03340	NA	A1	1.76039	0.165921	0.068696	0.0564211	tair.spec
AT1G03350	NA	A1	64.6128	49.9577	41.7605	45.9072	Ortho.Not.DEG
AT1G03360	RRP4	A4	5.34282	68.1401	73.5304	73.3464	Ortho.DEG
AT1G03370	NA	A1	50.8827	18.1084	17.3355	19.4672	Ortho.DEG
AT1G03380	ATG18G	A1	76.8406	11.388	16.4317	19.6338	Ortho.DEG
AT1G03400	NA	A1	29.4155	0.93562	2.81483	3.47535	tair.spec
AT1G03410	2A6	A1	3.37544	0.201374	0.153056	0.064664	Ortho.DEG
AT1G03430	AHP5	A1	28.9409	13.9123	17.8436	19.3695	tair.spec
AT1G03440	NA	A2	13.23	4.51279	7.72504	9.1308	Ortho.DEG
AT1G03445	BSU1	A1	1.99031	0.698356	0.337646	0.182026	Ortho.Not.DEG
AT1G03457	NA	A1	51.445	15.045	23.8903	26.0491	Ortho.DEG
AT1G03470	NET3A	A1	46.263	29.9494	28.6112	30.4624	Ortho.DEG
AT1G03495	NA	A1	13.8208	2.86915	3.56745	4.38569	tair.spec
AT1G03506	NA	A1	9.46267	2.53287	1.78078	1.9194	tair.spec
AT1G03510	PCMP-E3	A4	1.80545	3.51958	5.47373	4.03892	Ortho.Not.DEG
AT1G03520	NA	A1	24.0642	6.8337	9.52054	10.1493	Ortho.Not.DEG
AT1G03530	ATNAF1	A4	11.7926	65.4539	61.7883	62.8366	Ortho.DEG
AT1G03540	PCMP-E4	A6	2.22019	5.94241	8.20511	8.09659	Ortho.Not.DEG
AT1G03545	NA	A1	2.42875	0.920878	0.537799	0.701128	tair.spec
AT1G03550	SCAMP2	A1	6.9948	2.78675	3.27888	3.46947	Ortho.Not.DEG
AT1G03560	NA	A4	5.69392	14.5198	16.2059	17.8703	Ortho.Not.DEG
AT1G03600	PSB27-1	A2	15.7198	1.92035	9.72763	8.32262	Ortho.DEG
AT1G03610	NA	A1	81.5932	31.0243	36.7938	39.4873	tair.spec
AT1G03630	PORC	A1	8.53162	2.18321	3.00651	2.07561	tair.spec
AT1G03687	NA	A4	4.3595	27.4989	39.3994	37.5882	Ortho.DEG
AT1G03700	NA	A1	4.3734	0.111112	0.319028	0.271503	Ortho.DEG
AT1G03730	NA	A1	51.7303	22.8838	24.8393	20.7626	tair.spec
AT1G03740	NA	A1	48.5165	17.2325	13.4943	13.6237	Ortho.Not.DEG
AT1G03780	TPX2	A4	7.85956	67.0823	74.7771	74.9191	Ortho.DEG
AT1G03790	SOM	A3	22.0395	66.7024	5.88731	2.84069	tair.spec
AT1G03800	ERF10	A4	1.0708	3.04581	2.60692	2.81646	tair.spec
AT1G03820	NA	A3	3.66773	246.82	123.289	122.321	tair.spec
AT1G03830	NA	A4	3.22141	22.802	29.0207	29.9979	tair.spec
AT1G03840	MGP	A6	0.466144	2.95891	7.88903	9.8706	tair.spec
AT1G03850	NA	A1	105.687	3.16058	2.24	2.13267	tair.spec
AT1G03860	PHB2	A4	43.0637	173.366	161.52	151.265	Ortho.DEG
AT1G03870	FLA9	A5	110.942	48.4382	4.5233	2.96748	Ortho.DEG
AT1G03900	ATNAP4	A1	236.905	133.229	125.44	132.115	Ortho.Not.DEG
AT1G03920	NA	A1	6.95889	2.32047	0.722636	0.0891513	Ortho.Not.DEG
AT1G03935	NA	A1	28.3959	1.4231	3.03917	0.3199	tair.spec
AT1G03940	3AT1	A1	12.7235	5.36666	5.30119	5.12945	tair.spec
AT1G03950	VPS2.3	A1	24.3098	7.47832	3.44775	3.75109	Ortho.DEG
AT1G03970	GBF4	A1	42.3792	11.6008	17.873	16.8553	Ortho.DEG
AT1G03980	ATPCS2	A4	0.201559	5.15822	7.54025	7.58547	tair.spec
AT1G03990	FAO1	A1	9.64041	2.48436	2.12712	2.22791	Ortho.DEG
AT1G04020	ATBARD1	A4	2.05419	35.7319	36.3911	35.9825	Ortho.DEG
AT1G04027	NA	A1	17.3405	3.85171	2.40151	3.12079	tair.spec
AT1G04033	NA	A5	1.53309	1.86959	0.301597	0	tair.spec
AT1G04040	NA	A3	22.788	82.9892	25.7592	18.7054	tair.spec
AT1G04047	NA	A2	2.59236	1.18109	2.09006	2.03141	tair.spec
AT1G04050	SUVR1	A6	2.12968	12.3942	19.3681	21.0653	Ortho.DEG
AT1G04070	TOM9-1	A4	12.4028	59.5766	59.2653	53.3877	Ortho.DEG
AT1G04090	NA	A3	0.403723	2.6434	1.17242	1.09105	tair.spec
AT1G04100	IAA10	A3	5.15722	15.6017	3.8329	3.73059	Ortho.DEG
AT1G04130	TPR2	A4	9.28576	25.6572	31.3799	32.9593	Ortho.Not.DEG
AT1G04147	NA	A5	6.06271	6.49189	1.47832	1.23544	tair.spec
AT1G04150	NA	A6	0.00724769	3.04849	8.29488	7.65434	Ortho.DEG
AT1G04160	XI-B	A4	2.71019	9.15117	8.40075	10.1211	Ortho.DEG
AT1G04170	EIF2 GAMMA	A4	56.5976	186.599	185.223	178.224	Ortho.Not.DEG
AT1G04173	NA	A1	3.35339	0.459439	0.628183	0.409283	tair.spec
AT1G04180	YUC9	A6	0.306244	0.563725	2.83307	6.33898	Ortho.DEG
AT1G04187	NA	A1	18.6294	1.86599	3.85371	5.94913	tair.spec
AT1G04190	TPR3	A4	31.6078	116.094	122.017	116.108	Ortho.Not.DEG
AT1G04193	NA	A1	2.5189	0	0	0	tair.spec
AT1G04197	NA	A1	13.0236	3.46835	4.98434	3.15026	tair.spec
AT1G04217	NA	A1	24.4371	1.72634	0.361955	2.9862	tair.spec
AT1G04220	KCS2	A4	4.23278	20.5217	16.4225	13.6697	Ortho.DEG
AT1G04223	NA	A1	5.1865	0.259901	1.11767	0.964597	tair.spec
AT1G04240	SHY2	A5	96.1076	45.3487	14.4308	8.86913	Ortho.DEG
AT1G04247	NA	A4	2.22404	13.6042	12.0453	10.8996	tair.spec
AT1G04250	IAA17	A3	77.2781	157.024	84.184	92.9475	Ortho.DEG
AT1G04267	NA	A6	4.01862	15.2865	15.7519	23.2843	tair.spec
AT1G04270	RPS15A	A4	183.995	1565.95	1669.29	1572.25	Ortho.DEG
AT1G04273	NA	A4	1.68921	10.5831	14.4455	6.33766	tair.spec
AT1G04280	NA	A2	40.3807	17.4635	45.5066	46.6339	Ortho.DEG
AT1G04300	TRAF1B	A1	100.425	47.1255	55.5941	61.2417	Ortho.Not.DEG
AT1G04330	NA	A6	0.837338	1.93302	4.27683	2.63156	tair.spec
AT1G04340	NA	A4	17.5542	50.7912	54.0652	55.0928	tair.spec
AT1G04347	NA	A4	0.0626696	1.81315	1.00867	2.24542	tair.spec
AT1G04350	NA	A1	13.6675	1.82919	3.32491	3.53004	Ortho.DEG
AT1G04390	NA	A2	12.387	7.5975	10.5339	11.8084	tair.spec
AT1G04400	CRY2	A1	166.899	60.8719	57.8434	63.6529	Ortho.DEG
AT1G04420	NA	A1	18.27	10.3866	11.6265	12.2503	Ortho.DEG
AT1G04425	NA	A6	0.117241	17.7319	35.9645	29.5402	tair.spec
AT1G04427	NA	A1	7.06265	0.610777	0.854063	1.68224	tair.spec
AT1G04440	CKL13	A1	146.779	60.7041	51.7542	52.4529	Ortho.DEG
AT1G04467	NA	A1	1.44935	0.204556	0.164119	0.122595	tair.spec
AT1G04480	RPL23A	A4	67.6875	467.049	530.153	461.837	Ortho.Not.DEG
AT1G04490	NA	A5	2.41248	1.1109	0.406417	0.313968	Ortho.DEG
AT1G04510	PRP19A	A4	38.1519	112.441	124.247	123.937	Ortho.Not.DEG
AT1G04520	CRRSP3	A6	1.46473	47.8591	76.6311	82.2149	Ortho.DEG
AT1G04540	NA	A3	1.54679	4.54869	2.7732	3.30519	Ortho.Not.DEG
AT1G04560	NA	A1	2.32956	0	0.269284	0.299008	tair.spec
AT1G04563	NA	A6	0.401034	1.37799	3.29877	1.9678	tair.spec
AT1G04567	NA	A1	4.74405	0.699246	1.77132	1.79546	tair.spec
AT1G04570	NA	A3	2.21025	4.53167	2.83925	2.32988	Ortho.DEG
AT1G04590	NA	A4	13.0588	66.368	88.5175	91.7435	Ortho.DEG
AT1G04600	XI-A	A6	0.261419	1.31334	2.31437	3.09351	Ortho.DEG
AT1G04610	YUC3	A6	0.0615968	0.366237	26.8507	56.3885	Ortho.DEG
AT1G04620	HCAR	A1	22.0922	4.98434	4.09338	3.69348	Ortho.DEG
AT1G04630	MEE4	A4	22.4928	57.678	70.218	67.4471	Ortho.DEG
AT1G04635	EMB1687	A4	1.10145	13.8457	11.1321	12.8909	Ortho.DEG
AT1G04640	LIP2	A4	2.48884	6.94265	7.85521	6.51261	Ortho.DEG
AT1G04650	NA	A4	0.554361	9.90453	10.9975	11.1651	tair.spec
AT1G04660	NA	A1	5.79696	0.17784	0.16817	0.140674	tair.spec
AT1G04680	NA	A3	26.5531	838.573	81.4995	74.5314	Ortho.DEG
AT1G04700	NA	A6	0.675135	2.94299	4.41667	5.6412	Ortho.Not.DEG
AT1G04730	CTF18	A4	2.42114	21.6771	25.3676	25.9227	Ortho.DEG
AT1G04760	VAMP726	A4	2.0536	11.8196	12.5605	12.9542	Ortho.Not.DEG
AT1G04770	NA	A4	8.95809	63.9297	54.086	54.1294	Ortho.DEG
AT1G04778	NA	A1	2.3391	0.921684	0.300545	0.240013	tair.spec
AT1G04780	NA	A1	75.4027	41.4821	40.9028	43.363	Ortho.Not.DEG
AT1G04793	NA	A1	1.15471	0	0.153751	0	tair.spec
AT1G04800	NA	A1	2.0764	0.340232	0	0.0549454	tair.spec
AT1G04817	NA	A6	0	1.26936	3.15933	4.41703	tair.spec
AT1G04820	TUBA4	A4	133.279	763.337	697.877	695.222	Ortho.DEG
AT1G04827	NA	A1	2.54583	1.12609	0.820781	0.786424	tair.spec
AT1G04830	NA	A1	50.5371	23.2646	25.3223	27.8564	Ortho.DEG
AT1G04853	NA	A1	1.26053	0	0	0	tair.spec
AT1G04870	PRMT10	A4	36.0178	192.997	174.633	171.536	Ortho.DEG
AT1G04880	HMGB15	A3	0.414122	2.16587	0.665118	0.550854	Ortho.DEG
AT1G04900	NA	A4	3.2942	29.0491	34.3716	36.0515	Ortho.Not.DEG
AT1G04930	NA	A6	5.16541	12.1511	16.7498	16.8762	tair.spec
AT1G04945	NA	A4	7.25612	19.9103	19.8493	19.7022	tair.spec
AT1G04960	NA	A1	46.8296	26.3195	18.4534	17.4429	Ortho.DEG
AT1G04970	NA	A1	59.8232	28.9167	24.4428	24.7963	Ortho.DEG
AT1G04980	PDIL2-2	A3	4.21954	52.2587	25.5662	22.1946	Ortho.DEG
AT1G04985	NA	A1	38.3684	23.0332	25.6243	23.0209	Ortho.DEG
AT1G05000	NA	A4	1.16378	3.39748	3.48917	2.70487	Ortho.DEG
AT1G05010	ACO4	A1	39.5316	19.5036	14.6814	23.8665	Ortho.DEG
AT1G05023	NA	A1	2.576	0.108602	0.59585	0.102134	tair.spec
AT1G05030	NA	A2	8.3584	4.81609	5.90034	6.99696	Ortho.Not.DEG
AT1G05055	GTF2H2	A4	7.16016	22.4341	23.762	22.6714	Ortho.Not.DEG
AT1G05060	NA	A1	53.8543	27.1059	17.8994	17.5295	tair.spec
AT1G05065	CLE20	A4	0.737225	4.39214	2.98315	3.65791	tair.spec
AT1G05070	NA	A6	14.9051	33.8543	45.7721	47.4677	Ortho.DEG
AT1G05090	NA	A6	1.69709	1.60156	2.9563	3.77459	tair.spec
AT1G05100	MAPKKK18	A1	19.8256	12.5576	12.4795	13.1082	Ortho.DEG
AT1G05140	ARASP2	A1	29.8012	4.1127	8.38841	10.6526	Ortho.DEG
AT1G05170	B3GALT2	A1	8.22313	3.15497	3.71493	4.17331	Ortho.DEG
AT1G05190	RPL6	A1	106.389	48.64	67.4456	70.5525	Ortho.DEG
AT1G05205	NA	A4	6.39261	40.6661	45.1567	38.0559	Ortho.Not.DEG
AT1G05210	NA	A4	1.71414	30.6783	23.4869	23.4588	Ortho.DEG
AT1G05213	NA	A5	2.30641	2.40677	1.08573	1.274	tair.spec
AT1G05220	NA	A6	0.478457	2.52887	9.76054	10.5982	Ortho.DEG
AT1G05230	HDG2	A1	10.3841	0.642359	0.580359	0.982422	Ortho.Not.DEG
AT1G05260	PER3	A1	103.352	0.200294	3.964	2.09301	Ortho.DEG
AT1G05270	NA	A1	56.6381	40.6021	36.0337	37.1458	Ortho.Not.DEG
AT1G05277	NA	A2	3.35254	1.66761	3.029	3.11054	tair.spec
AT1G05280	NA	A3	0.206758	25.5734	1.22739	1.66133	tair.spec
AT1G05287	NA	A3	0	2.25004	0.630124	0.0708175	tair.spec
AT1G05297	NA	A6	0.23542	12.0318	27.2566	27.1481	tair.spec
AT1G05300	ZIP5	A1	2.87867	0.65864	1.23998	1.52933	Ortho.DEG
AT1G05310	PME8	A3	3.66911	9.78588	1.27705	0.45773	Ortho.DEG
AT1G05320	NA	A5	19.1009	16.5964	4.97011	4.77472	tair.spec
AT1G05330	NA	A1	2.81404	0.318765	0.0416848	0	tair.spec
AT1G05340	NA	A1	1247.07	8.30407	2.65548	2.49481	tair.spec
AT1G05360	KMS2	A6	8.61032	23.6591	33.2802	36.5948	Ortho.DEG
AT1G05370	NA	A4	1.24754	11.99	12.4524	11.8801	Ortho.DEG
AT1G05383	NA	A3	0.0449093	5.39902	0.475519	0.158422	tair.spec
AT1G05385	PSB27-2	A1	21.4452	3.1839	8.14462	6.43697	Ortho.DEG
AT1G05410	NA	A4	11.2662	41.8262	52.4421	53.8976	Ortho.DEG
AT1G05420	ATOFP12	A6	3.16273	7.83321	14.9696	15.08	tair.spec
AT1G05440	NA	A4	0.808099	12.1016	14.562	13.9549	Ortho.DEG
AT1G05450	NA	A3	0.28003	134.897	6.52924	2.17772	tair.spec
AT1G05460	SDE3	A6	2.52372	17.7053	27.6778	30.0835	Ortho.DEG
AT1G05470	IP5P6	A6	8.77809	23.4315	32.1212	33.0129	Ortho.DEG
AT1G05487	NA	A3	0	3.46183	0.191536	0.107126	tair.spec
AT1G05517	NA	A3	0	4.64712	3.63467	1.30418	tair.spec
AT1G05570	CALS1	A1	41.5133	14.9155	10.368	12.3677	tair.spec
AT1G05575	NA	A1	41.5516	2.68546	6.26509	3.83625	tair.spec
AT1G05577	NA	A6	0.208085	27.7136	48.4975	48.5091	Ortho.Not.DEG
AT1G05590	HEXO2	A4	6.15074	22.5592	28.2801	29.0286	Ortho.DEG
AT1G05610	APS2	A2	0.712826	0.210328	0.761005	1.04525	tair.spec
AT1G05620	URH2	A4	8.82782	34.3696	33.519	35.9078	Ortho.DEG
AT1G05640	NA	A6	2.28976	10.231	15.8913	17.5906	tair.spec
AT1G05670	NA	A6	4.96069	9.82476	13.2107	15.0104	Ortho.DEG
AT1G05675	UGT74E1	A1	6.50776	0.228579	0.2618	0.0966692	Ortho.Not.DEG
AT1G05680	UGT74E2	A5	4.67866	4.60016	3.75963	1.88376	Ortho.Not.DEG
AT1G05690	BT3	A1	1.52941	0.337541	0.761492	0.541944	Ortho.DEG
AT1G05730	NA	A4	0.791022	6.78682	7.57144	7.49419	Ortho.DEG
AT1G05770	JAL2	A1	7.7028	0.560916	2.58935	1.60254	tair.spec
AT1G05783	NA	A1	4.91319	1.08157	1.37387	1.5555	tair.spec
AT1G05785	NA	A1	8.52	6.12975	5.13583	6.18868	Ortho.DEG
AT1G05790	NA	A1	30.9661	15.4548	16.5406	18.4663	Ortho.DEG
AT1G05805	BHLH128	A1	56.6179	10.3886	10.4767	12.9836	Ortho.DEG
AT1G05820	SPPL5	A1	8.47148	4.62919	5.60743	5.2769	Ortho.DEG
AT1G05840	NA	A1	79.2614	23.7887	35.6994	36.7488	Ortho.DEG
AT1G05850	CTL1	A1	665.308	182.688	90.7277	92.4958	Ortho.DEG
AT1G05870	NA	A4	5.7858	21.8934	29.2988	30.3462	Ortho.DEG
AT1G05880	ARI12	A6	0	0.136505	2.24833	3.7299	tair.spec
AT1G05890	ARI5	A1	247.627	67.7225	114.586	128.72	tair.spec
AT1G05894	NA	A1	1.41147	0.298352	0.748569	0.542782	tair.spec
AT1G05910	NA	A4	12.4918	49.8499	57.4314	61.6738	Ortho.Not.DEG
AT1G05940	CAT9	A1	53.6699	23.8712	26.487	27.1346	Ortho.DEG
AT1G05950	NA	A6	3.47652	20.5159	31.0119	30.2159	tair.spec
AT1G05960	NA	A1	66.2061	43.1495	38.3314	39.0776	Ortho.DEG
AT1G05970	NA	A6	4.74779	9.95679	16.9819	16.9819	tair.spec
AT1G05977	NA	A4	0	0.7261	1.56538	0.535552	tair.spec
AT1G06010	NA	A6	5.04833	13.9743	22.0031	20.6189	tair.spec
AT1G06020	NA	A1	1.38657	0.491569	0.338597	0.456669	Ortho.DEG
AT1G06033	NA	A4	0.336056	18.0468	20.1416	14.7765	tair.spec
AT1G06040	BBX24	A1	337.69	82.2729	152.401	185.113	Ortho.DEG
AT1G06050	NA	A1	22.1718	9.19132	7.08015	5.7667	Ortho.DEG
AT1G06060	NA	A1	107.546	37.3561	35.0922	38.3636	Ortho.Not.DEG
AT1G06080	ADS1	A6	0.344832	311.748	671.317	684.065	tair.spec
AT1G06083	NA	A2	3.75019	1.58698	2.86489	2.17388	tair.spec
AT1G06087	NA	A3	0.23479	7.79504	3.74507	4.16318	tair.spec
AT1G06090	NA	A3	1.9835	12.6908	1.16472	0.346474	tair.spec
AT1G06110	SKIP16	A2	61.7443	25.8382	50.34	52.7679	Ortho.DEG
AT1G06123	NA	A1	34.2947	0	0	0	tair.spec
AT1G06143	EMB1444	A6	1.97977	5.08349	7.44955	8.36146	tair.spec
AT1G06163	NA	A1	9.87371	0	0	0	tair.spec
AT1G06180	ATMYB13	A6	3.87517	5.49649	25.2834	28.9478	tair.spec
AT1G06220	CLO	A4	25.8297	110.864	127.254	126.055	Ortho.Not.DEG
AT1G06227	NA	A4	2.57207	18.9417	19.8847	15.1447	tair.spec
AT1G06240	NA	A6	3.49718	11.498	18.2229	22.2418	Ortho.DEG
AT1G06270	NA	A4	4.51204	12.6756	14.7216	15.6592	tair.spec
AT1G06283	NA	A3	9.30839	26.4924	14.2	15.8979	tair.spec
AT1G06310	ACX3.2	A4	0.0210393	3.1954	4.95002	4.06738	Ortho.DEG
AT1G06320	NA	A6	0	0.507412	1.19431	1.33154	tair.spec
AT1G06350	NA	A6	0.0815143	2.52199	10.7908	15.292	tair.spec
AT1G06360	NA	A1	1.30542	0.0965385	0	0	tair.spec
AT1G06380	NA	A4	12.3171	33.5968	32.0848	31.9587	Ortho.DEG
AT1G06400	RABA1A	A1	201.847	62.9039	49.1072	49.4189	Ortho.Not.DEG
AT1G06410	TPS7	A1	162.261	78.6927	75.6254	78.9697	Ortho.DEG
AT1G06420	NA	A6	0.870773	6.80093	28.2263	33.4564	tair.spec
AT1G06430	FTSH8	A1	43.7415	6.26574	8.77398	10.526	Ortho.DEG
AT1G06460	ACD32.1	A1	64.0288	4.29281	3.8419	4.71524	tair.spec
AT1G06473	NA	A1	74.8838	1.86026	3.58907	4.95718	tair.spec
AT1G06500	NA	A6	12.0593	21.7949	33.1971	37.4499	tair.spec
AT1G06515	NA	A6	14.3309	39.1032	51.7351	57.9719	tair.spec
AT1G06520	GPAT1	A1	45.4982	1.38354	0.767509	0.44083	Ortho.DEG
AT1G06547	NA	A4	4.93315	37.7786	31.6181	27.0747	tair.spec
AT1G06550	NA	A4	22.2848	75.4562	88.2436	104.53	Ortho.DEG
AT1G06553	NA	A4	0.362778	6.98325	5.23241	5.82951	tair.spec
AT1G06570	HPD	A1	682.911	15.7108	22.4344	25.9429	Ortho.DEG
AT1G06573	NA	A1	16.3946	4.74633	4.46699	2.69886	tair.spec
AT1G06590	APC5	A6	8.31984	23.2404	30.523	34.0251	Ortho.DEG
AT1G06620	NA	A2	41.2972	9.80408	22.8749	27.3977	Ortho.DEG
AT1G06630	NA	A2	30.9683	18.2563	26.5021	29.3197	tair.spec
AT1G06640	NA	A1	124.186	44.0926	23.219	21.7381	Ortho.DEG
AT1G06645	NA	A1	2.69511	0.144904	0.0191322	0	Ortho.DEG
AT1G06650	NA	A1	20.7106	1.31489	2.12828	2.21437	Ortho.DEG
AT1G06660	JASON	A4	1.75173	28.1028	33.2651	31.2995	tair.spec
AT1G06670	NIH	A4	21.6633	71.3428	80.6658	88.3764	Ortho.DEG
AT1G06680	PSBP1	A1	122.313	5.1222	7.16603	8.3633	Ortho.DEG
AT1G06690	NA	A1	19.2068	6.32171	9.13518	12.3773	Ortho.DEG
AT1G06700	PTI11	A1	242.944	87.648	72.0065	78.4199	Ortho.DEG
AT1G06710	NA	A6	3.39228	7.36011	10.4459	10.9496	Ortho.DEG
AT1G06720	NA	A4	20.5946	88.8622	89.0783	91.0199	Ortho.Not.DEG
AT1G06727	NA	A6	1.75168	6.12238	14.3692	14.504	tair.spec
AT1G06733	NA	A6	1.15587	5.13422	8.71002	12.1103	tair.spec
AT1G06737	NA	A6	0.564825	1.41369	4.39825	2.36165	tair.spec
AT1G06740	NA	A6	4.14759	10.5125	18.9667	19.6119	tair.spec
AT1G06743	NA	A6	1.04783	2.19594	4.10527	5.63018	tair.spec
AT1G06760	NA	A4	59.6299	375.513	412.058	388.522	tair.spec
AT1G06773	NA	A2	4.05834	0.756666	1.62926	2.58667	tair.spec
AT1G06790	NA	A4	3.44073	23.117	24.3054	23.5538	Ortho.DEG
AT1G06830	GRXS11	A3	0	1.66686	1.14103	0.575252	Ortho.DEG
AT1G06877	NA	A1	5.34325	0	0	0	tair.spec
AT1G06883	NA	A3	0.02812	3.09605	0.133128	0.109145	tair.spec
AT1G06910	TRFL7	A6	5.28136	12.1224	17.9533	18.6488	tair.spec
AT1G06920	OFP4	A3	0	1.31762	0.422996	0.164161	tair.spec
AT1G06960	NA	A6	6.58612	27.7605	41.6846	43.9536	Ortho.DEG
AT1G06963	NA	A6	0.380417	0.418334	2.27214	1.82822	tair.spec
AT1G06977	NA	A6	0.539634	2.43799	4.34223	6.72804	tair.spec
AT1G06980	NA	A6	5.51128	2.69699	7.88708	11.5799	tair.spec
AT1G06983	NA	A5	2.47856	1.67669	0.0566949	0	tair.spec
AT1G06990	NA	A6	0	0.0952497	0.657115	1.94116	Ortho.DEG
AT1G06993	NA	A1	1.35281	0	0	0	tair.spec
AT1G07000	ATEXO70B2	A1	62.417	10.4441	7.80182	7.6433	Ortho.DEG
AT1G07010	NA	A1	9.31642	1.99762	2.96891	3.3276	Ortho.DEG
AT1G07040	NA	A1	144.966	24.0888	19.352	20.8072	Ortho.DEG
AT1G07050	NA	A1	1.41285	0.114772	0	0	tair.spec
AT1G07070	RPL35AA	A4	8.00424	71.029	66.5707	57.7781	Ortho.DEG
AT1G07080	NA	A1	178.742	65.9793	81.8343	86.654	Ortho.DEG
AT1G07110	FKFBP	A1	112.079	20.2217	30.3609	32.437	Ortho.DEG
AT1G07119	NA	A4	0.480535	1.38615	2.036	1.79007	tair.spec
AT1G07135	NA	A1	236.214	9.0093	9.28896	7.42346	tair.spec
AT1G07150	MAPKKK13	A1	33.5434	2.18789	4.85124	5.82306	tair.spec
AT1G07160	NA	A1	2.5383	1.40233	1.45683	1.85879	Ortho.DEG
AT1G07175	NA	A3	0.0366023	12.2152	0	0.0362454	tair.spec
AT1G07180	NDA1	A3	0.165697	10.3496	1.18532	0.316165	Ortho.DEG
AT1G07187	NA	A1	45.9989	1.98865	1.68523	3.4783	tair.spec
AT1G07200	SMXL6	A1	42.1752	12.0819	10.6751	10.5049	Ortho.DEG
AT1G07210	NA	A4	28.7022	135.959	147.047	140.617	Ortho.DEG
AT1G07230	NPC1	A1	59.767	26.9021	27.577	29.134	Ortho.DEG
AT1G07240	UGT71C5	A1	63.3027	19.3382	18.5152	16.9535	Ortho.DEG
AT1G07250	UGT71C4	A1	37.1795	18.4822	22.7855	23.6593	Ortho.DEG
AT1G07260	UGT71C3	A4	9.22836	54.1642	60.1939	52.9236	Ortho.DEG
AT1G07270	CDC6B	A4	0.491416	5.2734	5.83599	4.56798	Ortho.DEG
AT1G07280	NA	A6	1.35177	4.74819	5.14132	8.34146	tair.spec
AT1G07290	GONST2	A6	1.60092	4.04678	6.7122	9.05476	Ortho.DEG
AT1G07300	NA	A1	10.6144	6.68827	6.27775	7.43079	tair.spec
AT1G07310	NA	A1	106.974	38.0034	30.6751	36.7571	Ortho.DEG
AT1G07313	NA	A6	2.5296	3.4137	9.56652	11.2458	tair.spec
AT1G07323	NA	A1	140.822	77.0237	67.1507	68.8216	tair.spec
AT1G07370	PCNA	A4	4.99469	126.783	121.527	115.764	Ortho.DEG
AT1G07390	AtRLP1	A4	0.850382	2.70768	2.55324	2.2133	Ortho.Not.DEG
AT1G07393	NA	A4	0	4.13793	8.64594	4.34189	tair.spec
AT1G07400	HSP17.8	A3	2.68251	29.3845	12.2079	9.63283	tair.spec
AT1G07407	NA	A1	1.69136	0	0	0	tair.spec
AT1G07410	RABA2B	A3	3.99358	12.5531	5.06314	6.65942	Ortho.DEG
AT1G07420	SMO2-2	A1	45.5976	23.5917	25.185	32.1378	Ortho.DEG
AT1G07430	AIP1	A1	12.1995	4.81512	0.800298	0.867709	Ortho.DEG
AT1G07440	NA	A1	2.82516	0.341913	0.173858	0.0635753	Ortho.DEG
AT1G07530	SCL14	A1	72.2184	22.7811	41.1832	41.6243	Ortho.DEG
AT1G07570	APK1A	A6	10.2258	20.0924	34.993	33.0037	Ortho.DEG
AT1G07587	NA	A1	2.36558	0.252125	0.472311	0.047205	tair.spec
AT1G07590	NA	A3	17.8733	92.9826	24.3231	18.8207	Ortho.Not.DEG
AT1G07607	NA	A1	4.66643	2.36055	1.54055	2.26201	tair.spec
AT1G07610	MT1C	A3	7.78705	539.417	175.92	133.998	tair.spec
AT1G07615	ATOBGM	A4	6.65091	31.1415	39.38	40.2815	Ortho.DEG
AT1G07640	OBP2	A5	15.1868	12.0555	8.20177	7.3819	Ortho.DEG
AT1G07650	NA	A1	78.9457	13.5808	18.4829	20.7763	Ortho.DEG
AT1G07653	NA	A4	1.23424	9.21133	10.8977	10.779	tair.spec
AT1G07690	NA	A3	0.328548	2.66804	0.513786	0.100655	tair.spec
AT1G07700	NA	A2	10.922	4.79853	7.63134	7.58741	Ortho.DEG
AT1G07705	NA	A4	11.6334	35.3339	39.1669	41.9076	Ortho.Not.DEG
AT1G07720	KCS3	A1	153.913	5.06419	15.5402	13.6132	Ortho.DEG
AT1G07740	NA	A4	1.9438	5.99938	6.1839	7.36428	tair.spec
AT1G07743	NA	A4	0.913316	5.13128	5.85292	5.887	tair.spec
AT1G07770	RPS15AF	A4	59.5406	299.06	318.03	296.939	Ortho.DEG
AT1G07780	PAI1	A4	3.82734	37.7342	42.3923	35.5081	Ortho.DEG
AT1G07790	HTB1	A4	25.3316	295.3	306.785	306.731	Ortho.DEG
AT1G07820	NA	A4	46.0876	292.66	339.758	302.743	Ortho.DEG
AT1G07830	NA	A4	15.8508	68.8725	89.899	87.681	Ortho.Not.DEG
AT1G07840	NA	A4	19.265	53.0948	55.4047	52.8151	tair.spec
AT1G07870	NA	A1	22.4283	10.9729	13.5015	14.2299	Ortho.DEG
AT1G07880	MPK13	A3	3.0941	22.0858	12.082	10.3049	tair.spec
AT1G07890	APX1	A5	590.516	515.935	380.936	367.037	tair.spec
AT1G07897	NA	A4	0.343429	20.9596	17.9794	12.6032	tair.spec
AT1G07900	LBD1	A2	1.52074	0.34177	0.678701	0.919304	Ortho.Not.DEG
AT1G07901	NA	A1	6.67256	2.64435	0.920113	3.90697	tair.spec
AT1G07920	A1	A4	246.234	806.571	668.57	632.193	Ortho.DEG
AT1G07930	A1	A4	245.164	924.636	875.697	821.455	Ortho.DEG
AT1G07937	NA	A6	0.423765	9.68491	20.015	22.8471	tair.spec
AT1G07940	A1	A4	177.821	579.863	471.902	455.378	Ortho.DEG
AT1G07970	NA	A4	8.97317	30.0027	38.1726	38.4887	Ortho.Not.DEG
AT1G07985	NA	A1	21.0827	0.134776	7.1569	8.57801	tair.spec
AT1G08000	GATA10	A6	5.68894	13.414	17.4767	18.6447	tair.spec
AT1G08030	TPST	A6	16.5465	29.0567	68.6813	86.943	Ortho.Not.DEG
AT1G08050	NA	A1	13.9073	5.38875	6.1657	7.41745	tair.spec
AT1G08090	NRT2.1	A4	0.0380832	3.25896	5.6952	2.65011	Ortho.Not.DEG
AT1G08130	LIG1	A4	11.9544	71.0543	78.0197	74.2538	Ortho.Not.DEG
AT1G08160	NA	A1	58.4673	7.30396	9.1085	6.58398	Ortho.DEG
AT1G08165	NA	A6	0	0.246136	0.866962	1.16891	tair.spec
AT1G08180	SMR2	A2	16.5571	2.27857	12.1983	13.2869	tair.spec
AT1G08190	VPS41	A1	96.7198	48.2051	45.6426	48.972	Ortho.DEG
AT1G08220	NA	A4	5.24268	26.8243	26.0407	22.7818	tair.spec
AT1G08230	GAT1	A1	29.1073	2.60009	1.89496	1.7729	Ortho.DEG
AT1G08260	POL2A	A4	2.89765	19.8688	24.7374	29.2694	Ortho.DEG
AT1G08280	GALT29A	A4	3.98985	29.675	21.4225	21.7261	Ortho.DEG
AT1G08290	WIP3	A3	2.51333	32.7958	11.7366	8.38604	tair.spec
AT1G08293	NA	A6	0.0908093	6.75222	17.7872	17.779	tair.spec
AT1G08310	NA	A1	16.1005	3.47796	1.53981	1.11463	Ortho.DEG
AT1G08320	TGA9	A1	29.347	0.601101	0.17812	0.199859	Ortho.DEG
AT1G08340	ROPGAP5	A3	5.3794	29.6492	2.79841	1.15329	Ortho.DEG
AT1G08360	RPL10AA	A4	117.966	812.023	847.934	747.36	Ortho.Not.DEG
AT1G08380	PSAO	A1	106.853	0.378372	0.603086	0.594645	tair.spec
AT1G08390	NA	A6	3.06206	5.76289	9.07637	9.40718	Ortho.Not.DEG
AT1G08410	LSG1-2	A4	7.8325	71.6363	72.6013	66.8069	Ortho.DEG
AT1G08420	BSL2	A1	59.5561	38.5125	35.6018	37.6576	Ortho.Not.DEG
AT1G08430	ALMT1	A6	0.17712	82.1962	279.632	261.488	Ortho.DEG
AT1G08433	NA	A1	1.4927	0.247093	0	0	tair.spec
AT1G08460	HDA8	A1	41.3167	17.2691	23.7203	24.7836	Ortho.Not.DEG
AT1G08470	SSL3	A4	5.86492	18.7958	20.6272	21.4875	Ortho.DEG
AT1G08500	ENODL18	A1	22.5418	0.53162	2.19251	2.70588	tair.spec
AT1G08510	FATB	A1	132.592	78.4475	68.4651	71.2326	Ortho.DEG
AT1G08520	CHLD	A1	65.1325	12.6763	22.0019	26.0623	Ortho.DEG
AT1G08530	NA	A4	5.3422	12.7024	16.2202	16.3726	tair.spec
AT1G08540	SIGB	A1	26.831	11.5384	15.4412	16.7229	Ortho.DEG
AT1G08550	VDE1	A1	19.0496	3.8794	7.02168	7.11577	tair.spec
AT1G08560	KN	A4	20.8162	147.438	191.171	179.809	Ortho.DEG
AT1G08563	NA	A3	2.66081	10.1552	4.17475	6.00166	tair.spec
AT1G08570	ACHT4	A1	183.737	23.2659	38.9489	41.7924	Ortho.DEG
AT1G08580	NA	A4	36.0341	215.963	196.759	183.98	tair.spec
AT1G08610	NA	A6	5.87477	15.494	21.1477	21.6327	Ortho.DEG
AT1G08630	THA1	A1	381.988	0.71223	0.0792557	0.299431	Ortho.DEG
AT1G08650	PPCK1	A1	28.9223	14.055	10.9097	11.9867	Ortho.DEG
AT1G08660	SIA1	A6	14.1029	36.1936	50.0481	54.1318	Ortho.Not.DEG
AT1G08670	NA	A1	11.7127	0.0276728	0	0	Ortho.DEG
AT1G08680	ZIGA4	A1	67.6836	34.5258	36.2116	39.4042	Ortho.DEG
AT1G08697	NA	A6	0.665133	0.114884	1.52975	2.5326	tair.spec
AT1G08720	EDR1	A2	30.559	18.1748	22.7948	23.0242	Ortho.DEG
AT1G08730	XI-C	A6	0.031204	0.321845	0.877278	1.51455	Ortho.DEG
AT1G08770	PRA1E	A1	89.664	23.3789	15.7921	15.3135	Ortho.Not.DEG
AT1G08780	AIP3	A4	22.0672	73.88	82.6062	77.1317	Ortho.Not.DEG
AT1G08800	MYOB1	A1	87.0546	21.9868	11.0009	12.096	tair.spec
AT1G08810	MYB60	A3	1.37312	85.2914	3.4233	1.99189	Ortho.Not.DEG
AT1G08820	PVA22	A1	74.6053	45.2157	39.5507	42.5479	tair.spec
AT1G08830	CSD1	A1	395.981	179.585	74.6264	63.7364	Ortho.DEG
AT1G08840	emb2411	A4	2.5317	13.2556	16.9292	19.8302	Ortho.DEG
AT1G08847	NA	A1	20.6968	8.56245	11.3357	11.443	tair.spec
AT1G08880	HTA5	A4	48.219	220.031	189.114	183.18	Ortho.DEG
AT1G08890	SUGTL4	A1	136.001	16.5296	8.98184	10.0335	Ortho.Not.DEG
AT1G08900	SUGTL3	A1	19.8482	0.0752415	0.0124228	0.0984098	Ortho.Not.DEG
AT1G08920	ESL1	A5	124.297	91.2189	12.1733	6.54499	Ortho.Not.DEG
AT1G08930	ERD6	A1	387.521	38.5762	35.5081	29.9354	Ortho.Not.DEG
AT1G08937	NA	A6	1.56446	4.45198	8.3932	10.8838	tair.spec
AT1G08940	NA	A5	36.0894	31.9257	16.5526	16.6175	Ortho.DEG
AT1G08980	AMI1	A2	22.9853	6.77493	15.4805	12.5706	Ortho.DEG
AT1G08987	NA	A4	1.56104	15.9628	16.4133	20.4611	tair.spec
AT1G08990	GUX5	A3	1.80177	21.0216	2.96329	1.84484	tair.spec
AT1G09000	ANP1	A4	5.74641	18.375	19.6372	16.7608	Ortho.DEG
AT1G09010	EBM	A2	52.9857	24.29	50.7248	59.1988	Ortho.DEG
AT1G09040	NA	A6	2.4951	4.08402	6.72361	7.56747	Ortho.DEG
AT1G09050	NA	A6	2.22526	3.93414	6.70047	6.73344	Ortho.DEG
AT1G09070	SRC2	A1	919.906	175.952	133.544	102.114	Ortho.DEG
AT1G09080	MED37B	A3	0.278867	7.07316	0.390573	0.401248	tair.spec
AT1G09083	NA	A4	2.98563	14.9575	18.4639	15.3736	tair.spec
AT1G09087	NA	A4	5.22795	36.8164	49.0435	42.893	tair.spec
AT1G09090	RBOHB	A1	2.12714	0.151134	0	0.0103041	Ortho.DEG
AT1G09100	RPT5B	A4	23.317	70.407	60.2484	59.2058	Ortho.Not.DEG
AT1G09140	SR30	A1	109.14	47.2265	59.1902	65.7039	Ortho.DEG
AT1G09150	NA	A4	23.2694	87.6082	105.927	101.818	Ortho.Not.DEG
AT1G09180	ATSAR1	A3	1.48432	2.78801	0.468397	0.153131	Ortho.Not.DEG
AT1G09190	PCMP-E70	A4	3.23055	10.2285	10.8574	9.0536	Ortho.DEG
AT1G09200	HTR2	A4	18.7526	469.918	541.577	486.533	tair.spec
AT1G09210	CRT2	A4	26.4525	331.806	218.318	220.697	Ortho.DEG
AT1G09217	NA	A1	1.23908	0	0	0	tair.spec
AT1G09220	PCMP-E25	A4	1.2959	3.92984	3.89832	4.60124	Ortho.Not.DEG
AT1G09240	NAS3	A3	0.089533	1.25606	0.479636	0.123184	tair.spec
AT1G09290	NA	A4	9.21281	25.0519	32.5769	29.1761	Ortho.Not.DEG
AT1G09310	NA	A1	682.782	24.9946	38.3617	41.5122	Ortho.DEG
AT1G09320	NA	A2	25.831	15.8415	23.384	26.1689	Ortho.DEG
AT1G09340	CRB	A1	17.167	5.15168	6.80217	6.5389	Ortho.DEG
AT1G09350	GOLS3	A3	1.4459	8.17428	0.885134	0.463739	Ortho.DEG
AT1G09367	NA	A6	2.74708	3.68588	9.42733	8.30461	tair.spec
AT1G09380	NA	A3	0.465252	571.513	21.3128	10.244	Ortho.Not.DEG
AT1G09390	NA	A6	4.78814	10.5305	17.6515	19.7192	Ortho.DEG
AT1G09410	PCMP-H18	A4	1.224	3.54219	4.09014	4.33177	Ortho.DEG
AT1G09415	NIMIN-3	A1	24.3059	12.3537	12.9757	12.0171	tair.spec
AT1G09420	G6PD4	A1	25.8899	14.6822	15.0272	13.6237	Ortho.DEG
AT1G09427	NA	A6	0.118723	1.4697	1.79942	2.54049	tair.spec
AT1G09430	ACLA-3	A1	118.052	44.0583	38.6459	39.4436	Ortho.DEG
AT1G09440	NA	A3	1.0408	6.41824	0.869577	0.517812	tair.spec
AT1G09447	NA	A2	1.99541	0.429079	1.08617	1.17803	tair.spec
AT1G09450	HASPIN	A4	1.75531	25.9665	36.4841	37.2018	Ortho.DEG
AT1G09457	NA	A1	2.07434	0	0.478026	0.12561	tair.spec
AT1G09470	NEAP3	A4	0.861133	36.2657	43.8438	46.1041	tair.spec
AT1G09480	NA	A1	21.1575	10.5073	8.69374	6.42404	Ortho.DEG
AT1G09493	NA	A4	0.112555	1.18792	0.996855	0.763976	tair.spec
AT1G09497	NA	A4	0.610371	6.42636	5.1099	4.13113	tair.spec
AT1G09527	NA	A4	0.285297	3.3793	3.50839	2.14703	tair.spec
AT1G09530	PIF3	A2	14.2832	3.96172	7.46269	10.8218	tair.spec
AT1G09540	MYB61	A3	1.7753	4.5299	2.83873	3.06524	tair.spec
AT1G09553	NA	A2	0.637007	0	0.870419	1.02387	tair.spec
AT1G09560	GLP4	A1	328.944	117.431	123.463	124.373	Ortho.DEG
AT1G09570	PHYA	A6	112.05	43.4904	145.363	186.677	Ortho.DEG
AT1G09573	NA	A4	0.164583	2.60893	2.12173	2.53039	tair.spec
AT1G09575	NA	A2	5.99766	2.48681	7.7844	7.66261	Ortho.DEG
AT1G09580	NA	A4	1.84582	26.2186	26.2793	26.3521	Ortho.DEG
AT1G09590	RPL21A	A4	64.3255	1189.18	1175.64	1108.95	Ortho.Not.DEG
AT1G09600	NA	A6	0.0359154	2.99465	6.80469	6.5055	Ortho.DEG
AT1G09630	RABA2A	A4	10.9301	52.2872	59.2037	59.3513	tair.spec
AT1G09645	NA	A5	42.5069	29.8437	20.4364	19.0174	Ortho.DEG
AT1G09647	NA	A1	27.8568	5.08384	1.81236	1.78595	tair.spec
AT1G09650	NA	A4	0.178576	1.41436	1.98154	2.03371	Ortho.DEG
AT1G09665	NA	A4	0	2.34103	2.38524	3.0833	tair.spec
AT1G09687	NA	A1	128.21	21.1684	35.5563	24.3882	tair.spec
AT1G09690	RPL21A	A4	105.212	1293.02	1463.39	1338.34	Ortho.Not.DEG
AT1G09710	NA	A2	17.0903	8.49523	13.8183	13.2933	Ortho.DEG
AT1G09740	NA	A5	155.893	82.267	24.8416	19.0009	Ortho.DEG
AT1G09750	AED3	A1	12.1294	0.556173	0.213918	0.0900051	Ortho.DEG
AT1G09753	NA	A4	4.9378	57.2412	77.5404	55.845	tair.spec
AT1G09760	U2A'	A4	37.6474	193.055	212.747	198.186	Ortho.DEG
AT1G09780	PGM1	A4	35.7169	204.363	193.245	196.535	Ortho.DEG
AT1G09787	NA	A3	0.780521	29.1777	18.548	9.4889	tair.spec
AT1G09800	NA	A4	2.17899	10.3946	12.8748	12.0722	Ortho.DEG
AT1G09803	NA	A1	1.05486	0	0	0.206641	tair.spec
AT1G09812	NA	A4	0.632493	13.7601	11.324	10.1299	tair.spec
AT1G09815	POLD4	A4	45.2205	115.867	132.514	123.036	tair.spec
AT1G09820	NA	A4	1.59871	8.67879	12.3058	12.6538	Ortho.DEG
AT1G09830	PUR2	A4	12.4233	52.254	62.3822	60.6314	Ortho.DEG
AT1G09850	XBCP3	A1	38.6731	25.3577	20.9617	21.2938	Ortho.DEG
AT1G09863	NA	A6	1.17973	1.59357	3.63322	4.42087	tair.spec
AT1G09867	NA	A4	0.971699	22.5147	20.4527	14.6422	tair.spec
AT1G09880	NA	A1	1.10151	0.554586	0.619272	0.518319	Ortho.DEG
AT1G09890	NA	A3	0.662106	5.65924	0.606808	0.456693	Ortho.DEG
AT1G09900	NA	A4	7.79712	20.735	24.8271	25.03	Ortho.DEG
AT1G09920	NA	A1	58.9406	37.8037	38.7945	39.8846	Ortho.DEG
AT1G09930	OPT2	A1	1.54894	0.0912296	0.0560316	0.0690317	Ortho.DEG
AT1G09932	NA	A1	32.6459	0.951248	6.94776	8.66444	Ortho.DEG
AT1G09940	HEMA2	A1	90.4075	24.1376	21.907	17.325	Ortho.DEG
AT1G09950	RAS1	A1	44.548	10.8333	11.2347	5.57579	tair.spec
AT1G09970	LRR XI-23	A1	454.304	178.081	118.5	101.687	Ortho.DEG
AT1G09993	NA	A6	0.127004	0.582072	1.87887	1.93507	tair.spec
AT1G10020	NA	A1	118.191	56.7418	33.667	35.2089	Ortho.DEG
AT1G10030	ERG28	A4	10.5314	36.1703	40.0817	35.9363	Ortho.DEG
AT1G10040	NA	A6	10.9553	7.6178	13.9953	18.8337	Ortho.DEG
AT1G10060	ATBCAT-1	A1	2.6624	0.530042	0.0819697	0.0218517	Ortho.Not.DEG
AT1G10070	BCAT2	A1	489.55	3.11858	0.875127	0.683528	Ortho.Not.DEG
AT1G10090	NA	A1	53.7288	11.0998	7.9699	8.44733	Ortho.DEG
AT1G10095	NA	A2	6.65453	3.78416	5.03334	5.12468	Ortho.DEG
AT1G10120	BHLH74	A6	5.20309	16.428	24.0472	25.2752	Ortho.DEG
AT1G10140	NA	A1	202.983	56.1288	52.2139	48.7263	tair.spec
AT1G10180	EXO84C	A6	12.3192	36.2788	54.663	59.6198	Ortho.DEG
AT1G10200	WLIM1	A1	171.096	62.7602	73.9427	74.2381	Ortho.DEG
AT1G10210	MPK1	A1	38.3714	6.56877	9.3465	12.1162	Ortho.DEG
AT1G10220	NA	A1	2.50612	0.182154	0.267154	0.476223	tair.spec
AT1G10230	ASK18	A4	9.41031	120.398	99.0691	102.699	tair.spec
AT1G10240	FRS11	A6	5.27217	11.7937	15.4806	16.0423	tair.spec
AT1G10270	GRP23	A4	9.57661	48.9221	48.7674	49.5989	Ortho.DEG
AT1G10280	NA	A6	2.03761	4.23912	5.95412	6.35826	Ortho.DEG
AT1G10300	NA	A6	0.263537	12.9771	23.5013	23.483	Ortho.DEG
AT1G10310	NA	A6	11.8997	21.6903	34.2326	34.5577	Ortho.Not.DEG
AT1G10330	PCMP-E71	A6	2.57673	4.82835	7.77352	8.7547	tair.spec
AT1G10340	NA	A1	15.6917	0.0606315	0.484926	0.550008	tair.spec
AT1G10360	GSTU18	A1	17.7562	0.466285	0.387733	0.525181	Ortho.DEG
AT1G10370	GSTU17	A2	14.4977	2.88383	4.11737	10.0244	Ortho.DEG
AT1G10380	NA	A5	14.3013	8.53149	3.63153	2.95132	tair.spec
AT1G10400	UGT90A2	A6	0.122434	4.0075	32.6752	45.4949	Ortho.DEG
AT1G10410	NA	A2	61.7638	29.1727	37.5121	46.7332	Ortho.DEG
AT1G10455	NA	A3	0	5.37217	1.17713	1.17583	tair.spec
AT1G10460	GLP7	A3	1.12868	134.212	40.6545	45.1843	Ortho.Not.DEG
AT1G10470	ARR4	A4	34.5288	204.92	163.778	158.929	Ortho.DEG
AT1G10480	ZFP5	A5	26.1714	29.9005	9.13788	8.82224	tair.spec
AT1G10490	NA	A4	19.4935	60.7439	58.5702	55.5356	Ortho.Not.DEG
AT1G10520	POLL	A6	1.69997	11.7245	19.236	19.7187	Ortho.DEG
AT1G10530	NA	A6	0.807241	2.40279	2.88575	7.68353	tair.spec
AT1G10540	NAT8	A6	0.330895	1.47362	2.57738	3.50078	Ortho.DEG
AT1G10550	XTH33	A3	3.80744	7.72671	2.37797	2.08077	tair.spec
AT1G10560	PUB18	A2	3.33501	0.924639	3.71343	4.80852	Ortho.DEG
AT1G10600	AMSH2	A2	31.5133	13.6595	24.2536	24.4822	Ortho.DEG
AT1G10610	BHLH90	A1	26.984	5.07901	8.75957	11.1847	tair.spec
AT1G10640	NA	A3	1.22656	17.7304	0.353339	0.120105	Ortho.DEG
AT1G10650	NA	A5	39.3486	32.7341	21.8566	23.6186	Ortho.DEG
AT1G10660	NA	A1	66.2264	20.1247	26.1764	25.5706	tair.spec
AT1G10670	ACLA-1	A4	69.5681	163.061	193.079	205.083	tair.spec
AT1G10682	NA	A1	447.181	20.3008	6.30791	5.3519	tair.spec
AT1G10690	SMR8	A3	2.22901	18.2046	9.49742	10.287	tair.spec
AT1G10700	PRS3	A3	18.3305	37.161	23.1258	21.1786	Ortho.DEG
AT1G10710	PHS1	A6	0.0349612	0.557193	1.15817	0.992438	tair.spec
AT1G10720	NA	A1	62.145	29.8607	22.3216	22.3138	Ortho.Not.DEG
AT1G10750	NA	A6	3.6214	19.3032	50.0259	60.5692	Ortho.Not.DEG
AT1G10760	GWD1	A6	35.2743	19.8206	52.4924	73.9869	Ortho.DEG
AT1G10770	NA	A3	0.190138	4.57161	0.436546	0.299739	tair.spec
AT1G10780	NA	A4	2.97325	25.0862	23.9084	21.404	tair.spec
AT1G10790	NA	A5	1.03413	0.619478	0.124156	0.258159	tair.spec
AT1G10800	NA	A3	1.66475	5.63823	0.871999	0.417225	tair.spec
AT1G10810	NA	A3	1.84956	2.77055	0.717909	1.24719	Ortho.DEG
AT1G10850	NA	A6	2.84303	19.9519	37.4054	42.0988	Ortho.DEG
AT1G10865	NA	A1	100.971	52.372	53.8034	61.5611	Ortho.DEG
AT1G10890	NA	A1	122.611	59.6459	67.6191	75.5947	Ortho.DEG
AT1G10910	NA	A2	34.2655	17.9375	33.1062	36.9657	tair.spec
AT1G10920	LOV1	A1	11.5914	0.707692	1.35103	1.96811	Ortho.DEG
AT1G10930	RECQL4A	A4	1.91441	20.2135	23.5954	26.3482	Ortho.DEG
AT1G10940	ASK1	A5	146.986	171.644	102.441	106.211	Ortho.DEG
AT1G10960	FD1	A2	46.4727	11.5876	26.3379	27.7184	Ortho.DEG
AT1G10970	ZIP4	A4	3.57173	11.3339	11.4756	11.111	Ortho.DEG
AT1G10990	NA	A4	1.21855	57.168	82.1344	85.1733	tair.spec
AT1G11000	MLO4	A6	4.83644	28.2967	59.7818	62.2856	Ortho.DEG
AT1G11100	NA	A4	1.81237	5.25466	5.37748	5.38711	Ortho.Not.DEG
AT1G11112	NA	A4	0	3.86266	3.81469	2.3408	tair.spec
AT1G11120	NA	A4	1.1946	17.4727	23.1939	26.3524	tair.spec
AT1G11125	NA	A6	0.204176	9.51514	15.3169	16.5729	tair.spec
AT1G11130	SUB	A4	2.54936	66.5932	77.2118	86.6758	Ortho.DEG
AT1G11160	NA	A6	0.187146	6.15787	9.13377	9.92206	Ortho.Not.DEG
AT1G11170	NA	A4	2.45429	8.74689	11.0384	11.4678	Ortho.DEG
AT1G11175	NA	A1	130.724	4.51669	7.15784	8.14234	tair.spec
AT1G11180	NA	A1	66.2685	5.00555	8.07629	9.03755	tair.spec
AT1G11185	NA	A1	50.6694	12.9172	11.842	10.4961	tair.spec
AT1G11190	ENDO1	A3	7.72793	47.8349	11.2688	4.68239	Ortho.DEG
AT1G11210	NA	A1	53.2558	5.53395	1.45678	0.695005	tair.spec
AT1G11220	NA	A4	2.03038	18.4784	21.3587	20.109	tair.spec
AT1G11240	NA	A4	14.6294	67.5429	75.7498	76.7685	Ortho.DEG
AT1G11260	STP1	A1	940.333	33.7877	51.2052	50.9482	Ortho.DEG
AT1G11280	NA	A6	11.6254	42.2657	56.9076	61.402	Ortho.DEG
AT1G11290	PCMP-H40	A6	1.31798	3.55631	5.26334	5.34608	Ortho.Not.DEG
AT1G11300	NA	A6	0.695446	1.19433	2.46408	1.9826	Ortho.DEG
AT1G11310	MLO2	A1	77.9165	25.0695	33.2341	35.9494	tair.spec
AT1G11320	NA	A4	3.2887	8.72876	8.7291	9.01753	Ortho.DEG
AT1G11330	NA	A4	4.89714	13.5513	9.50143	11.3798	Ortho.DEG
AT1G11350	SD113	A1	7.66693	3.42009	2.24677	2.37101	Ortho.DEG
AT1G11360	NA	A1	87.2649	34.2067	39.6601	41.0594	Ortho.DEG
AT1G11380	NA	A2	34.4975	9.66213	18.4424	19.8757	Ortho.DEG
AT1G11410	NA	A1	6.03868	1.12339	0.778484	1.14105	Ortho.DEG
AT1G11420	DUF2	A6	3.22633	20.6447	46.8055	52.9585	tair.spec
AT1G11430	MORF9	A1	56.5736	31.6242	38.8053	38.916	Ortho.DEG
AT1G11440	NA	A1	5.34343	0.870384	1.23716	1.62581	tair.spec
AT1G11450	NA	A1	4.01704	1.37237	0.776897	0.740841	Ortho.DEG
AT1G11475	NRPB10	A4	32.8104	86.9955	88.2436	79.6713	Ortho.Not.DEG
AT1G11500	NA	A1	1.49624	0.0984093	0.202166	0.0932712	Ortho.DEG
AT1G11530	CXXS1	A1	274.182	2.23482	0.599489	0.561822	Ortho.DEG
AT1G11540	NA	A3	0.488032	5.70796	1.61161	0.921847	Ortho.DEG
AT1G11545	XTH8	A6	6.67283	8.28189	24.4091	30.3604	Ortho.DEG
AT1G11570	NTL	A1	2.03977	0.420863	1.09935	0.663862	Ortho.DEG
AT1G11580	ATPMEPCRA	A4	54.0745	790.586	1056.62	1076.8	Ortho.Not.DEG
AT1G11600	CYP77B1	A4	0.451175	219.561	269.158	225.889	Ortho.DEG
AT1G11650	RBP45B	A1	561.821	257.304	221.655	222.979	Ortho.DEG
AT1G11670	DTX36	A6	68.6031	28.5848	144.413	174.923	Ortho.DEG
AT1G11700	NA	A5	2.18762	2.25309	0.621908	0.532142	tair.spec
AT1G11720	ATSS3	A6	1.63024	7.49243	23.7793	28.0167	Ortho.DEG
AT1G11730	B3GALT1	A6	0.688768	3.96951	7.2191	7.56618	tair.spec
AT1G11740	NA	A3	1.48706	9.94142	0.327552	0.205564	Ortho.DEG
AT1G11780	NA	A4	6.03421	18.5665	23.5214	24.2445	Ortho.DEG
AT1G11790	ADT1	A4	7.56404	24.065	25.2644	27.3479	tair.spec
AT1G11800	NA	A4	8.80911	22.8326	19.0371	19.0131	Ortho.DEG
AT1G11820	NA	A2	57.0966	34.381	56.5603	56.9254	Ortho.DEG
AT1G11910	APA1	A1	783.656	233.455	243.772	264.724	Ortho.DEG
AT1G11915	NA	A1	1.70203	0.586702	0.940298	0.874187	tair.spec
AT1G11925	NA	A1	1.72664	0.113464	0	0	tair.spec
AT1G11930	NA	A1	94.3686	42.9248	54.9782	58.6521	Ortho.DEG
AT1G11940	NA	A4	3.29464	15.0405	16.3036	17.6237	Ortho.DEG
AT1G11960	NA	A1	52.8	13.1896	12.0406	12.2219	Ortho.DEG
AT1G12000	PFP-BETA1	A4	16.5618	204.177	197.763	197.934	Ortho.DEG
AT1G12010	NA	A2	26.3794	1.08736	10.978	14.049	Ortho.DEG
AT1G12020	NA	A4	2.67917	40.4529	39.2723	42.6445	tair.spec
AT1G12030	NA	A6	0.0463413	2.99546	11.0096	12.22	tair.spec
AT1G12050	FAH	A6	16.0511	45.8094	72.7754	84.5823	Ortho.DEG
AT1G12060	BAG5	A4	2.55738	12.4624	9.44147	11.226	Ortho.DEG
AT1G12064	NA	A6	0	0.156732	1.06018	0.91245	tair.spec
AT1G12070	NA	A2	3.93726	1.94582	3.14294	2.8218	Ortho.DEG
AT1G12080	NA	A1	1443.28	286.799	37.9812	16.7382	tair.spec
AT1G12090	ELP	A1	1265.03	327.502	0.270476	0.420851	tair.spec
AT1G12110	NPF6.3	A4	26.9556	165.458	113.092	118.509	Ortho.DEG
AT1G12130	NA	A6	0	0.19109	3.30545	4.16519	Ortho.DEG
AT1G12140	FMOGS-OX5	A5	31.362	25.518	10.7863	10.0741	Ortho.DEG
AT1G12160	NA	A6	2.43065	13.7569	28.301	31.7711	Ortho.DEG
AT1G12200	NA	A3	48.9542	102.491	64.2861	56.9786	Ortho.DEG
AT1G12220	RPS5	A1	7.90815	3.08847	3.40159	3.53364	Ortho.DEG
AT1G12240	BFRUCT4	A1	147.596	9.6413	8.42651	12.2645	Ortho.DEG
AT1G12250	TL20.3	A1	11.7063	1.60344	4.40005	5.40442	Ortho.DEG
AT1G12260	NAC007	A3	3.06578	9.33747	1.61029	1.50394	Ortho.DEG
AT1G12270	HOP1	A6	66.8941	149.442	199.651	206.994	Ortho.DEG
AT1G12280	SUMM2	A1	5.07915	1.22076	2.58466	2.31228	Ortho.DEG
AT1G12290	NA	A1	4.46542	0.91746	1.58376	2.35372	Ortho.DEG
AT1G12300	NA	A6	0.811549	5.76066	8.46821	10.1086	tair.spec
AT1G12320	NA	A3	1.72714	4.87682	2.53747	2.79766	tair.spec
AT1G12330	NA	A2	10.2163	5.82934	9.13772	10.7651	Ortho.DEG
AT1G12360	KEU	A1	109.111	56.4439	66.0993	72.8931	Ortho.Not.DEG
AT1G12370	PHR1	A6	2.66387	34.869	64.6385	74.3518	Ortho.DEG
AT1G12380	NA	A6	1.28625	25.6952	34.8744	40.9732	Ortho.DEG
AT1G12420	ACR8	A5	51.3471	39.7408	21.2039	23.3803	Ortho.DEG
AT1G12430	ARK3	A4	12.742	35.1322	26.6216	27.1024	Ortho.Not.DEG
AT1G12440	SAP1	A1	473.92	66.7019	53.5642	56.4519	tair.spec
AT1G12450	NA	A1	16.3934	8.12577	6.89148	6.73978	Ortho.Not.DEG
AT1G12460	NA	A6	1.7357	5.13426	8.47971	8.60129	Ortho.DEG
AT1G12520	CCS	A1	86.3217	31.3436	21.1931	22.6014	Ortho.DEG
AT1G12530	NA	A4	10.9195	26.8973	29.6662	34.8503	tair.spec
AT1G12580	PEPKR1	A1	70.8747	33.4215	45.0108	45.4726	Ortho.DEG
AT1G12600	UTR4	A3	1.62639	22.9562	2.12607	2.85002	Ortho.DEG
AT1G12610	DREB1F	A1	93.3153	3.61496	3.3524	2.21437	Ortho.DEG
AT1G12620	NA	A6	2.71672	5.74511	7.20192	9.26631	tair.spec
AT1G12640	LPLAT1	A5	59.5947	56.4909	33.7408	34.8556	Ortho.DEG
AT1G12650	NA	A4	28.9508	78.5599	72.6693	71.1902	Ortho.Not.DEG
AT1G12710	AtPP2-A12	A1	17.5937	6.05335	8.01156	8.82823	tair.spec
AT1G12740	CYP87A2	A6	2.75815	71.6576	306.802	292.498	tair.spec
AT1G12760	NA	A1	171.064	47.1509	30.9507	31.1829	Ortho.DEG
AT1G12775	NA	A6	1.0504	3.42299	4.85069	4.82134	tair.spec
AT1G12780	UGE1	A1	441.56	37.2507	12.8412	15.0826	Ortho.DEG
AT1G12790	PTD	A1	25.5899	2.97375	5.06865	6.51088	Ortho.Not.DEG
AT1G12805	NA	A6	0	1.28392	9.99228	17.8126	tair.spec
AT1G12810	NA	A1	148.036	64.0489	41.8995	49.5122	tair.spec
AT1G12840	VHA-C	A1	81.2169	56.163	44.3344	43.8712	Ortho.DEG
AT1G12860	SCRM2	A6	3.40269	21.8884	70.7107	81.4578	Ortho.DEG
AT1G12880	NUDT12	A6	3.587	22.5353	54.8697	56.2447	Ortho.DEG
AT1G12890	ERF088	A6	0.075569	12.5908	40.563	47.01	tair.spec
AT1G12900	GAPA-2	A1	38.3893	0.577525	0.250134	0.214592	Ortho.Not.DEG
AT1G12970	PIRL3	A2	22.7603	9.74857	17.4879	18.7635	Ortho.DEG
AT1G12990	NA	A1	39.5292	8.76989	9.28188	10.2933	Ortho.DEG
AT1G13000	NA	A1	23.3905	14.6289	14.2852	15.8671	tair.spec
AT1G13020	EIF4B2	A4	15.2178	46.3496	52.6357	53.7093	Ortho.DEG
AT1G13030	COIL	A4	4.64898	32.6932	44.2362	46.3817	Ortho.DEG
AT1G13040	NA	A4	4.3915	15.5214	18.2089	18.3446	Ortho.DEG
AT1G13050	NA	A4	5.45208	15.1012	18.266	17.7856	tair.spec
AT1G13060	PBE1	A4	61.6902	179.688	188.521	186.69	Ortho.Not.DEG
AT1G13080	CYP71B2	A3	10.116	83.8536	16.6094	7.22314	Ortho.DEG
AT1G13090	CYP71B28	A1	16.6565	4.4334	2.87319	1.64774	Ortho.DEG
AT1G13100	CYP71B29	A5	15.2082	12.8026	3.567	2.5243	Ortho.DEG
AT1G13110	CYP71B7	A3	50.2431	155.537	15.0171	9.84071	Ortho.DEG
AT1G13130	NA	A3	0.926469	9.60717	1.36224	0.56047	Ortho.DEG
AT1G13140	CYP86C3	A6	0.678387	2.02078	3.66672	4.28948	Ortho.Not.DEG
AT1G13150	CYP86C4	A2	4.88201	2.09438	4.23394	6.23937	Ortho.Not.DEG
AT1G13160	NA	A4	16.9192	90.756	81.8882	82.0719	Ortho.DEG
AT1G13170	ORP1D	A6	4.63276	30.1708	42.8373	46.0277	Ortho.DEG
AT1G13190	NA	A1	62.707	33.2675	41.7295	45.5871	tair.spec
AT1G13195	NA	A1	20.1345	10.4022	12.8834	12.3999	Ortho.DEG
AT1G13210	ALA11	A1	92.5657	30.2682	14.8668	15.1582	Ortho.DEG
AT1G13220	LINC2	A6	14.2645	40.9233	53.606	57.1547	Ortho.DEG
AT1G13245	RTFL17	A1	51.3124	5.1797	5.88416	4.15618	tair.spec
AT1G13250	GATL3	A6	1.90495	8.6271	12.7006	13.3567	Ortho.DEG
AT1G13260	RAV1	A1	345.697	24.1289	44.4081	35.1977	tair.spec
AT1G13280	AOC4	A6	23.1399	98.8869	183.894	202.042	Ortho.DEG
AT1G13300	HRS1	A4	2.82755	16.2322	12.6508	10.9601	Ortho.DEG
AT1G13330	HOP2	A4	1.2223	17.1846	18.2609	19.4706	Ortho.DEG
AT1G13340	NA	A1	18.7736	6.66236	6.21762	4.64756	Ortho.DEG
AT1G13350	NA	A1	53.5648	22.3481	28.8193	32.6992	Ortho.DEG
AT1G13360	NA	A1	173.559	47.367	28.8895	30.5096	tair.spec
AT1G13370	NA	A4	0	2.13895	1.52328	2.1025	Ortho.DEG
AT1G13390	NA	A1	67.7386	36.3533	26.0271	26.682	tair.spec
AT1G13410	NA	A4	1.60674	6.40798	7.12836	7.03851	tair.spec
AT1G13420	SOT8	A5	4.71232	3.99827	4.51438	2.20442	Ortho.DEG
AT1G13430	STO9	A1	2.21711	0.652951	0.67402	0.381228	Ortho.DEG
AT1G13440	GAPC2	A4	263.671	664.26	868.753	864.749	Ortho.DEG
AT1G13450	GT-1	A2	40.589	18.2341	31.7123	34.7691	Ortho.DEG
AT1G13480	NA	A4	0.201249	4.99905	4.20377	4.77647	Ortho.DEG
AT1G13520	NA	A3	2.7121	14.1368	2.16502	2.8201	Ortho.DEG
AT1G13530	NA	A1	20.5422	0.4094	3.28339	3.27371	Ortho.DEG
AT1G13540	NA	A2	4.46306	0.197981	2.6576	3.15293	Ortho.DEG
AT1G13590	PSK1	A3	0.994308	26.7686	13.9542	11.1801	tair.spec
AT1G13609	NA	A6	0.0514116	0.437097	2.11863	1.06733	tair.spec
AT1G13610	NA	A6	0.258108	0.530894	1.45823	2.2767	tair.spec
AT1G13620	RGF2	A6	0.0362349	0.505409	12.8608	40.7267	tair.spec
AT1G13630	NA	A6	2.06946	4.4563	5.98068	6.60328	Ortho.DEG
AT1G13635	NA	A3	1.57668	9.7259	0.790493	0.758296	Ortho.Not.DEG
AT1G13640	PI4KG6	A1	112.64	20.0552	38.5703	41.2481	Ortho.DEG
AT1G13670	NA	A1	118.642	9.52718	3.1949	3.64534	tair.spec
AT1G13700	PGL1	A1	69.9887	4.60299	2.55763	1.93692	Ortho.DEG
AT1G13730	NA	A4	10.4318	99.2018	103.211	97.4133	Ortho.DEG
AT1G13740	AFP2	A2	9.22429	4.45429	10.9264	11.5213	Ortho.DEG
AT1G13750	PAP1	A6	1.31745	1.5783	6.07381	7.03311	Ortho.DEG
AT1G13770	RUS3	A6	5.40945	16.4695	23.4283	26.8024	Ortho.DEG
AT1G13790	FDM4	A6	0.908114	1.54276	2.89259	3.48493	tair.spec
AT1G13800	NA	A4	0.284449	4.73095	6.35639	7.10166	Ortho.DEG
AT1G13810	NA	A4	9.0474	23.0951	23.2886	25.5373	tair.spec
AT1G13820	NA	A1	34.4737	6.22636	8.75859	10.0636	Ortho.DEG
AT1G13830	NA	A1	1.38849	0.476456	0.171091	0.0652301	Ortho.DEG
AT1G13860	QUL1	A6	2.63556	12.4	16.3584	18.5684	tair.spec
AT1G13900	PAP2	A5	22.2993	16.7959	12.6591	13.5497	Ortho.DEG
AT1G13920	NA	A1	13.9555	1.49692	3.26224	2.49113	tair.spec
AT1G13930	NA	A1	1755.66	77.157	24.2923	27.5247	tair.spec
AT1G13950	ELF5A-1	A4	13.4341	33.9637	28.4066	29.4432	Ortho.DEG
AT1G13960	WRKY4	A1	106.973	24.5504	26.829	27.167	tair.spec
AT1G13990	NA	A5	67.8923	60.3066	42.4528	46.7538	Ortho.DEG
AT1G14000	VIK	A5	111.09	107.865	63.5975	62.1426	Ortho.DEG
AT1G14020	OFUT3	A6	9.6939	22.3765	30.7489	35.2896	Ortho.Not.DEG
AT1G14030	LSMT-L	A2	8.06237	4.87644	7.47976	9.39422	Ortho.Not.DEG
AT1G14040	PHO1;H3	A5	24.0607	25.5478	16.6262	14.3615	tair.spec
AT1G14060	NA	A4	13.4372	109.4	94.4805	82.1531	tair.spec
AT1G14071	MIR830A	A6	12.6727	7.22004	18.3155	21.0762	tair.spec
AT1G14080	FUT6	A3	0.428173	25.2584	3.9462	9.96335	Ortho.Not.DEG
AT1G14120	NA	A1	31.2528	1.06184	1.73213	0.952776	Ortho.DEG
AT1G14150	PNSL2	A1	3.6821	0	0	0	tair.spec
AT1G14160	NA	A1	4.97555	0	0	0	Ortho.Not.DEG
AT1G14170	NA	A5	19.2293	19.523	11.4938	15.4591	Ortho.DEG
AT1G14180	NA	A4	0.924066	18.4774	21.4282	23.3668	tair.spec
AT1G14185	NA	A1	1.91952	0.0655077	0.138133	0.136025	tair.spec
AT1G14190	NA	A1	2.98587	1.69954	1.38493	1.72483	tair.spec
AT1G14200	NA	A1	42.6916	7.83905	10.403	10.2181	Ortho.DEG
AT1G14240	APY3	A3	7.91588	25.546	11.9715	9.5594	Ortho.Not.DEG
AT1G14260	NA	A3	1.65288	15.7843	7.44777	7.76512	tair.spec
AT1G14270	NA	A1	9.64229	2.41915	3.94196	3.80566	Ortho.Not.DEG
AT1G14280	PKS2	A1	8.54409	1.49398	0	0	tair.spec
AT1G14290	SBH2	A2	20.8875	10.7179	14.127	16.7579	Ortho.DEG
AT1G14310	NA	A4	5.27335	15.8875	17.8487	15.4408	Ortho.DEG
AT1G14320	RPL10A	A4	211.44	1210.66	1256.11	1127.72	Ortho.DEG
AT1G14330	NA	A2	45.2743	21.1857	29.2349	31.5413	Ortho.Not.DEG
AT1G14340	NA	A5	17.9539	14.4624	11.3965	10.6649	Ortho.DEG
AT1G14345	NA	A2	10.0635	3.08723	7.03516	7.87207	Ortho.Not.DEG
AT1G14360	UTR3	A3	6.87268	54.1242	31.8524	32.4659	Ortho.DEG
AT1G14370	PBL2	A1	78.4877	22.1283	10.152	8.03456	Ortho.DEG
AT1G14380	IQD28	A1	56.0831	29.7131	31.9641	30.6168	Ortho.DEG
AT1G14390	NA	A6	1.04046	0.804305	2.7665	4.84044	Ortho.DEG
AT1G14400	UBC1	A1	251.909	133.704	159.219	160.289	tair.spec
AT1G14410	WHY1	A4	4.09702	26.2743	39.5767	38.6146	Ortho.DEG
AT1G14430	NA	A1	1.41219	0.784744	0.622551	0.730577	Ortho.Not.DEG
AT1G14450	NA	A3	1.37646	4.77451	2.82005	3.51439	tair.spec
AT1G14480	NA	A1	123.785	21.3705	23.564	15.8274	tair.spec
AT1G14490	NA	A6	0.710005	4.00275	5.61647	6.30512	Ortho.DEG
AT1G14520	MIOX1	A1	35.8687	1.78274	0.404477	0.210439	Ortho.DEG
AT1G14530	THH1	A1	14.5251	9.55829	10.9399	10.5382	Ortho.DEG
AT1G14540	PER4	A1	15.5709	1.9828	0.0653762	0.0462721	Ortho.Not.DEG
AT1G14580	NA	A1	16.7858	0.0991694	0.0928528	0.0554768	Ortho.DEG
AT1G14600	NA	A3	0.590463	6.47381	2.62719	1.74885	tair.spec
AT1G14610	TWN2	A4	74.8366	231.609	227.277	235.366	Ortho.Not.DEG
AT1G14620	DECOY	A4	10.9039	145.598	152.624	150.382	Ortho.Not.DEG
AT1G14630	NA	A4	0.380354	14.6392	11.7342	11.8857	tair.spec
AT1G14680	NA	A4	1.9022	7.48081	6.56001	8.57667	tair.spec
AT1G14700	PAP3	A1	16.208	0.101488	0.477743	0.882594	Ortho.DEG
AT1G14710	NA	A4	25.7844	100.963	115.444	116.588	Ortho.DEG
AT1G14720	XTH28	A1	53.5484	30.9042	22.6905	25.8494	Ortho.DEG
AT1G14730	CYB561C	A1	65.5577	7.87323	6.63146	4.0325	Ortho.DEG
AT1G14740	OBE3	A2	156.703	68.8491	112.616	122.085	Ortho.DEG
AT1G14750	SDS	A6	0.209069	1.52056	3.56951	2.85044	Ortho.DEG
AT1G14770	NA	A6	4.13694	14.438	20.1348	22.0774	tair.spec
AT1G14780	NA	A5	17.9671	13.9433	2.65495	2.18859	tair.spec
AT1G14790	RDR1	A2	22.7459	6.96268	14.5763	16.4511	Ortho.DEG
AT1G14810	NA	A4	22.4882	107.883	103.287	90.7654	Ortho.DEG
AT1G14820	NA	A6	5.7741	31.632	48.7989	48.1634	tair.spec
AT1G14840	MAP70.4	A6	3.332	12.9759	17.6101	19.0371	Ortho.DEG
AT1G14850	NUP155	A6	21.392	42.982	61.8063	66.5622	Ortho.DEG
AT1G14860	NUDT18	A1	25.9936	1.4084	10.129	10.9659	Ortho.DEG
AT1G14870	PCR2	A1	141.638	18.6676	14.8517	11.1639	Ortho.DEG
AT1G14890	NA	A1	228.085	72.2802	15.8457	14.2344	Ortho.Not.DEG
AT1G14900	HMGA	A4	74.5939	211.368	244.922	245.925	Ortho.DEG
AT1G14920	GAI	A6	7.85677	5.37293	20.5905	23.1226	Ortho.Not.DEG
AT1G14970	OFUT4	A6	2.01244	20.3011	36.7013	41.0649	Ortho.DEG
AT1G14980	CPN10	A4	30.5255	313.23	279.929	245.159	Ortho.DEG
AT1G14990	NA	A4	6.99643	17.7409	19.4118	20.379	Ortho.DEG
AT1G15010	NA	A1	276.523	4.44336	3.03539	1.08573	tair.spec
AT1G15020	QSOX1	A2	28.4637	15.3653	21.0248	22.6586	Ortho.DEG
AT1G15040	GAT1_2.1	A1	179.545	0.328752	0.83082	1.01163	Ortho.DEG
AT1G15050	IAA34	A1	3.58803	0.124763	0	0.0288346	tair.spec
AT1G15080	LPP2	A4	3.65506	10.908	13.3036	13.5351	Ortho.DEG
AT1G15085	NA	A4	1.85382	113.106	105.928	168.958	tair.spec
AT1G15100	RHA2A	A1	148.518	66.3534	35.5034	32.0961	tair.spec
AT1G15120	NA	A4	45.2574	119.18	97.9092	84.385	Ortho.Not.DEG
AT1G15125	NA	A5	1.45208	1.27522	1.08648	0.957197	tair.spec
AT1G15130	BRO1	A1	132.32	55.7809	52.4067	57.2057	Ortho.DEG
AT1G15160	DTX11	A6	2.89486	7.93158	10.5101	12.558	Ortho.DEG
AT1G15170	DTX12	A6	9.27446	23.6459	37.1173	41.5533	Ortho.DEG
AT1G15180	DTX13	A1	8.8523	0.431236	0.241783	0.0862912	Ortho.DEG
AT1G15190	FLA19	A1	6.10333	3.64299	3.08293	2.99697	tair.spec
AT1G15210	ABCG35	A4	9.35234	36.6534	30.7029	31.4476	Ortho.DEG
AT1G15215	NA	A6	3.60044	15.586	27.1738	30.2208	tair.spec
AT1G15250	RPL37A	A4	17.3469	76.7252	93.3695	83.3906	Ortho.Not.DEG
AT1G15260	NA	A1	1.64806	0.226814	0.230231	0.107864	tair.spec
AT1G15270	NA	A4	99.6383	297.715	275.309	244.151	tair.spec
AT1G15290	NA	A2	9.75166	3.62434	8.86378	10.1391	Ortho.DEG
AT1G15330	PV42A	A6	1.67982	0.221924	12.5977	14.9128	Ortho.DEG
AT1G15340	MBD10	A2	354.35	171.234	329.819	350.763	tair.spec
AT1G15350	NA	A1	135.253	34.6266	35.2013	39.1553	Ortho.DEG
AT1G15380	NA	A1	484.281	16.9982	11.2524	8.16322	Ortho.DEG
AT1G15385	NA	A3	0.119868	10.7397	3.61667	6.1742	tair.spec
AT1G15390	PDF1A	A4	7.03287	28.677	33.8409	29.91	Ortho.DEG
AT1G15400	NA	A1	242.111	58.2637	24.2943	25.1458	tair.spec
AT1G15420	NA	A4	27.0279	76.287	94.824	87.2909	Ortho.DEG
AT1G15430	NA	A1	32.7553	19.7663	21.2653	19.5249	tair.spec
AT1G15440	PWP2	A4	14.5165	86.9118	99.5989	95.8099	Ortho.DEG
AT1G15460	BOR4	A3	0.378457	26.3042	4.31096	3.9148	Ortho.DEG
AT1G15470	NA	A4	7.77828	24.7051	25.8677	26.5729	Ortho.DEG
AT1G15480	NA	A4	3.99263	46.5947	59.4485	53.2582	Ortho.DEG
AT1G15520	ABCG40	A6	0.603154	2.43601	4.76046	5.70382	tair.spec
AT1G15530	LECRKS1	A1	36.6638	8.14429	9.87666	10.302	tair.spec
AT1G15550	GA3OX1	A6	0.477889	0.302761	7.66451	7.06564	tair.spec
AT1G15570	CYCA2-3	A6	1.84685	41.3312	69.9438	78.8401	Ortho.DEG
AT1G15580	IAA5	A3	0.634901	19.9924	7.79942	6.61101	tair.spec
AT1G15630	NA	A6	0.0233731	0.338366	1.40404	1.92682	tair.spec
AT1G15640	NA	A6	0.144427	0.195487	1.71601	2.05805	tair.spec
AT1G15660	CENP-C	A6	17.6543	54.296	78.5027	77.6874	Ortho.DEG
AT1G15730	NA	A2	21.18	12.3232	17.3111	17.3572	Ortho.Not.DEG
AT1G15740	NA	A1	187.756	22.771	35.8494	39.8834	Ortho.DEG
AT1G15760	NA	A4	1.24715	9.08076	11.1307	12.7903	tair.spec
AT1G15770	MED15B	A6	0.0738423	0.356796	0.934045	1.33773	tair.spec
AT1G15772	NA	A3	1.1046	4.90181	2.89881	1.8763	tair.spec
AT1G15790	NA	A5	13.121	11.7578	7.96547	7.8952	Ortho.DEG
AT1G15810	NA	A4	16.8391	86.8178	88.3041	85.0806	Ortho.Not.DEG
AT1G15820	LHCB6	A1	54.6596	3.81514	9.41825	9.18411	Ortho.Not.DEG
AT1G15830	NA	A6	0.462308	0.931113	4.86969	5.91032	tair.spec
AT1G15840	NA	A6	0.387141	0.273611	5.40674	6.06685	tair.spec
AT1G15860	NA	A5	49.8564	41.5028	28.0026	29.9056	Ortho.DEG
AT1G15870	NA	A4	0.480439	19.4646	19.1439	18.3329	tair.spec
AT1G15880	GOS11	A1	83.7047	33.4071	47.8171	48.5581	Ortho.Not.DEG
AT1G15885	NA	A1	5.06728	2.24789	3.55139	2.52412	tair.spec
AT1G15890	NA	A1	8.64713	1.30171	0.54029	0.4231	Ortho.DEG
AT1G15900	NA	A2	4.45098	2.63928	4.84782	2.91406	Ortho.Not.DEG
AT1G15910	FDM1	A6	11.5413	52.28	102.097	112.278	tair.spec
AT1G15930	RPS12A	A4	74.1556	458.672	532.527	492.563	Ortho.DEG
AT1G15940	NA	A6	31.1505	54.9267	93.162	104.882	Ortho.DEG
AT1G15950	CCR1	A5	54.9664	49.7997	30.3375	34.8368	Ortho.DEG
AT1G15960	NRAMP6	A3	1.99438	11.1045	0.534306	0.24292	Ortho.DEG
AT1G15970	NA	A4	6.14675	18.4289	21.417	22.9844	Ortho.DEG
AT1G15980	PNSB1	A1	4.93735	1.80974	0.336081	0.317143	Ortho.Not.DEG
AT1G16000	NA	A4	6.32404	61.8136	75.0244	66.9054	Ortho.DEG
AT1G16060	ADAP	A4	1.03544	5.43133	5.89226	8.22204	Ortho.DEG
AT1G16070	TULP8	A4	0.0553495	11.8881	16.2861	15.1051	Ortho.DEG
AT1G16090	WAKL7	A2	7.89018	3.27783	6.26303	6.10491	tair.spec
AT1G16110	WAKL6	A1	5.14843	0.837081	1.20652	1.05342	Ortho.DEG
AT1G16120	WAKL1	A5	2.74708	2.02466	0.599072	0.305462	Ortho.DEG
AT1G16130	WAKL2	A1	46.9823	2.03818	0.527702	0.548564	Ortho.DEG
AT1G16180	NA	A5	143.694	111.838	87.2941	86.91	Ortho.Not.DEG
AT1G16190	RAD23A	A4	23.2299	79.2386	94.9305	94.2278	tair.spec
AT1G16210	NA	A5	121.553	91.4701	71.251	72.8709	Ortho.DEG
AT1G16220	NA	A4	1.56259	30.1996	35.901	35.2076	tair.spec
AT1G16240	SYP51	A1	228.827	52.3974	49.6563	57.2133	Ortho.Not.DEG
AT1G16250	NA	A1	23.818	8.64271	11.6658	11.5428	tair.spec
AT1G16260	WAKL8	A1	24.2737	0.663766	2.12012	3.32957	Ortho.DEG
AT1G16270	NA	A4	17.862	45.7778	52.7125	58.8704	Ortho.Not.DEG
AT1G16300	GAPCP2	A4	7.67962	45.116	56.8214	50.6411	Ortho.DEG
AT1G16310	MTP10	A3	3.53485	15.424	2.00618	1.16254	Ortho.DEG
AT1G16320	NA	A1	97.56	16.6919	14.0132	11.0131	Ortho.Not.DEG
AT1G16330	CYCB3;1	A4	4.06351	48.3558	42.6629	46.0879	tair.spec
AT1G16340	ATKDSA2	A6	4.2627	23.7275	38.0731	41.331	Ortho.DEG
AT1G16350	NA	A4	21.7797	111.996	141.568	144.446	Ortho.DEG
AT1G16370	2022-10-06	A1	67.796	5.02948	6.17998	3.80834	Ortho.Not.DEG
AT1G16390	2022-10-03	A1	7.14025	0.0156845	0	0	Ortho.Not.DEG
AT1G16430	MED22A	A6	2.32334	8.26855	13.1155	13.079	Ortho.DEG
AT1G16460	STR2	A1	173.242	32.883	54.6462	60.4755	Ortho.DEG
AT1G16470	PAB1	A4	42.4219	114.646	107.707	103.22	Ortho.Not.DEG
AT1G16480	NA	A4	1.80586	4.84396	5.44245	6.09209	Ortho.Not.DEG
AT1G16500	NA	A4	0.83898	4.86718	6.03219	6.90225	tair.spec
AT1G16510	SAUR41	A5	4.32982	3.53899	0.557855	0.587237	Ortho.DEG
AT1G16515	NA	A1	2.55253	0.953706	0.582789	0.260121	tair.spec
AT1G16520	NA	A4	18.3268	93.7816	113.824	112.476	Ortho.DEG
AT1G16530	LBD3	A3	0.0720152	26.4591	9.88219	8.33649	tair.spec
AT1G16630	NA	A4	3.11008	45.6866	51.7772	47.6713	tair.spec
AT1G16640	NA	A4	0.450679	10.4813	13.564	14.2099	tair.spec
AT1G16670	CRPK1	A1	43.9051	17.021	18.8851	22.0154	Ortho.DEG
AT1G16690	NA	A4	6.08491	16.978	22.6533	22.8514	Ortho.Not.DEG
AT1G16700	NA	A4	32.5312	90.7301	91.3494	87.6831	Ortho.Not.DEG
AT1G16720	HCF173	A1	32.4227	6.03663	7.67778	8.27082	Ortho.DEG
AT1G16730	UP6	A1	2.27424	0.295013	0.0574999	0.122268	tair.spec
AT1G16740	NA	A4	19.6082	110.627	119.213	107.157	Ortho.DEG
AT1G16750	NA	A1	2.17585	0.180608	0.253282	0.192529	Ortho.DEG
AT1G16780	AVPL2	A4	3.15122	8.19301	10.1872	10.3001	Ortho.Not.DEG
AT1G16800	NA	A6	3.08545	8.6373	11.0106	13.765	tair.spec
AT1G16820	NA	A2	2.89235	1.61721	2.8098	2.54462	tair.spec
AT1G16830	NA	A4	0.881908	8.56423	8.45113	8.80317	tair.spec
AT1G16840	NA	A1	48.8957	22.4907	24.2354	26.3124	tair.spec
AT1G16850	NA	A1	21.6634	0.741363	0.59709	0.293138	tair.spec
AT1G16870	NA	A4	24.5607	88.7971	87.1071	83.6291	Ortho.DEG
AT1G16880	ACR11	A1	156.773	30.2868	29.5712	28.7941	Ortho.Not.DEG
AT1G16900	ALG9	A4	9.29727	37.8309	49.5686	48.7879	Ortho.Not.DEG
AT1G16920	RABA1B	A4	25.3332	93.1783	123.502	123.492	Ortho.Not.DEG
AT1G16930	NA	A1	19.19	4.78905	3.18973	3.57619	Ortho.DEG
AT1G16960	NA	A1	1.6096	0	0.118852	0	Ortho.DEG
AT1G17020	SRG1	A5	24.6892	11.8266	5.99952	3.76027	tair.spec
AT1G17030	NA	A3	1.63077	83.6275	8.34989	3.27585	tair.spec
AT1G17040	SHA	A6	5.3164	11.5455	17.7298	20.3365	Ortho.Not.DEG
AT1G17050	SPS2	A6	13.6527	23.4804	40.6554	50.1581	Ortho.DEG
AT1G17060	CYP72C1	A3	13.6139	195.042	47.0902	43.6052	Ortho.DEG
AT1G17065	NA	A3	1.54211	36.359	8.61465	8.78861	tair.spec
AT1G17070	STIPL1	A4	8.94932	28.1345	23.3052	24.6797	Ortho.DEG
AT1G17080	NA	A1	146.612	55.5515	33.4971	31.2989	Ortho.DEG
AT1G17100	NA	A1	15.0578	6.3747	6.1749	7.34609	Ortho.DEG
AT1G17120	CAT8	A1	26.3054	15.705	15.7531	17.5378	Ortho.DEG
AT1G17140	ICR1	A6	18.5368	171.091	321.175	309.636	tair.spec
AT1G17145	DA2L	A1	91.4558	23.0433	36.4666	34.5479	Ortho.DEG
AT1G17147	VQ1	A1	49.2413	1.84022	2.88215	1.74159	tair.spec
AT1G17170	GSTU24	A4	39.6688	186.229	270.178	263.715	Ortho.DEG
AT1G17180	GSTU25	A4	5.1575	303.522	368.292	422.662	Ortho.DEG
AT1G17190	GSTU26	A1	125.641	4.26507	21.2682	26.3306	Ortho.DEG
AT1G17200	NA	A6	25.9811	39.2777	142.205	151.453	Ortho.DEG
AT1G17210	ATILP1	A2	113.915	55.0394	86.0218	93.452	Ortho.DEG
AT1G17220	FUG1	A1	56.8368	11.7376	20.6893	23.5798	Ortho.DEG
AT1G17235	RTFL11	A4	0.123709	3.32297	1.49362	2.48098	tair.spec
AT1G17255	NA	A1	1.08415	0.326069	0.313852	0.423948	tair.spec
AT1G17260	AHA10	A1	2.77724	0.668642	0.703901	0.647702	Ortho.Not.DEG
AT1G17280	UBC34	A1	59.2449	32.9655	31.4053	31.3059	Ortho.Not.DEG
AT1G17290	ALAAT1	A1	175.245	90.0719	85.579	88.8905	Ortho.DEG
AT1G17310	NA	A3	0.175721	18.6678	8.33838	2.93243	Ortho.DEG
AT1G17340	SAC5	A1	74.4261	12.7116	6.78613	6.78065	tair.spec
AT1G17345	SAUR77	A1	16.107	4.54115	0.615422	0.0706093	Ortho.DEG
AT1G17350	NA	A4	6.30489	16.6062	22.0593	22.4134	Ortho.DEG
AT1G17380	TIFY11A	A1	19.9109	2.87997	3.26492	2.84826	tair.spec
AT1G17400	NA	A6	1.39919	0.158298	3.20362	5.73249	tair.spec
AT1G17410	NA	A2	14.0595	6.72333	12.2563	11.8067	tair.spec
AT1G17420	LOX3	A1	46.5223	1.7723	1.94684	1.02737	Ortho.DEG
AT1G17430	NA	A2	15.5281	4.46611	16.156	14.6949	Ortho.DEG
AT1G17480	IQD7	A4	2.53332	14.2951	14.2698	12.2352	Ortho.DEG
AT1G17490	NA	A6	7.759	19.311	32.4586	33.4495	tair.spec
AT1G17510	NA	A4	8.56177	24.6956	24.7379	23.2162	tair.spec
AT1G17550	HAB2	A1	53.7709	28.761	35.9651	37.9715	Ortho.DEG
AT1G17560	HLL	A4	1.47571	47.2804	49.6413	50.7737	Ortho.DEG
AT1G17590	NFYA8	A4	4.97238	12.412	15.7862	15.2833	Ortho.DEG
AT1G17620	NA	A1	380.024	76.7188	49.983	42.8029	Ortho.DEG
AT1G17630	PCMP-E72	A4	1.34301	5.81712	5.54654	4.84536	Ortho.Not.DEG
AT1G17640	NA	A2	14.1579	5.9734	9.58283	9.31163	Ortho.Not.DEG
AT1G17650	GLYR2	A6	3.95507	11.4547	20.2171	21.462	Ortho.DEG
AT1G17665	NA	A5	16.4905	12.674	8.732	8.5806	tair.spec
AT1G17690	NOF1	A4	15.0755	57.1212	54.7463	56.8222	Ortho.DEG
AT1G17710	NA	A3	0.118524	1.73029	0.282753	0.24969	Ortho.DEG
AT1G17745	PGDH	A3	11.6979	58.1292	31.6129	28.7277	Ortho.DEG
AT1G17750	PEPR2	A1	14.0594	5.35553	5.17742	5.16438	Ortho.DEG
AT1G17780	NA	A1	38.6677	18.9899	11.2465	11.9674	tair.spec
AT1G17810	TIP3-2	A1	3.98823	0	0.0244494	0	Ortho.DEG
AT1G17830	NA	A2	8.58134	5.23334	7.40636	7.31531	Ortho.DEG
AT1G17850	STR8	A6	3.01168	14.8962	24.2676	25.2171	Ortho.Not.DEG
AT1G17870	EGY3	A5	13.5405	10.8854	8.14806	9.41161	Ortho.DEG
AT1G17880	BTF3	A4	159.264	928.084	929.571	920.135	Ortho.Not.DEG
AT1G17890	GER2	A4	18.7034	83.1204	70.1688	75.5929	Ortho.Not.DEG
AT1G17920	HDG12	A4	1.97787	7.47165	9.7923	10.7507	Ortho.DEG
AT1G17940	NA	A1	31.2646	11.8757	10.2601	11.0972	Ortho.DEG
AT1G17950	MYB52	A3	0.257061	4.67617	0.904535	0.677246	Ortho.Not.DEG
AT1G17960	NA	A3	12.2324	28.8104	2.69652	2.0161	Ortho.DEG
AT1G17970	NA	A1	19.8585	1.96318	4.36782	3.78976	Ortho.DEG
AT1G17980	PAPS1	A1	50.1243	28.3658	35.8009	36.4004	Ortho.Not.DEG
AT1G17990	NA	A1	3.92611	0.0391988	0.0995953	0.0363684	Ortho.DEG
AT1G18030	NA	A2	16.2795	10.0443	14.9951	15.423	Ortho.Not.DEG
AT1G18040	CDKD-3	A4	9.84501	49.3803	52.6161	54.5004	Ortho.Not.DEG
AT1G18075	MIR159B	A6	1.52495	9.37656	22.6937	26.676	tair.spec
AT1G18080	RACK1A	A4	168.905	1135.28	1145.82	1026.14	Ortho.DEG
AT1G18090	NA	A4	1.84723	10.5183	14.0961	12.8414	Ortho.DEG
AT1G18100	MFT	A3	0.785461	103.543	8.30068	3.93734	Ortho.DEG
AT1G18140	LAC1	A5	3.37229	2.70721	0.350762	0.157455	Ortho.Not.DEG
AT1G18150	MPK8	A5	44.164	43.5634	30.8062	31.3844	tair.spec
AT1G18160	NA	A2	53.9598	31.5834	38.7815	42.2352	Ortho.Not.DEG
AT1G18170	FKBP17-2	A1	14.5371	3.20128	5.5089	4.57612	Ortho.DEG
AT1G18180	NA	A6	0.46729	9.27668	19.5849	20.0724	Ortho.DEG
AT1G18190	GC2	A4	17.3475	41.3614	49.763	54.0797	Ortho.Not.DEG
AT1G18193	NA	A1	4.06967	0	0	0	tair.spec
AT1G18197	NA	A1	1.76336	0.67433	0.432857	0.796918	tair.spec
AT1G18200	RABA6B	A1	71.1622	0.657069	0.746595	0.316266	tair.spec
AT1G18210	CML27	A1	142.864	72.6743	94.1603	97.1693	tair.spec
AT1G18250	ATLP-1	A4	2.2084	342.302	385.175	401.461	Ortho.DEG
AT1G18260	HRD3A	A1	71.2608	51.8747	47.1339	53.6499	Ortho.Not.DEG
AT1G18265	NA	A6	0.57398	0.137538	8.47847	16.4147	Ortho.DEG
AT1G18270	NA	A1	229.703	14.4655	14.2734	15.6799	Ortho.DEG
AT1G18280	NA	A1	18.5331	0.199317	0.15989	0	tair.spec
AT1G18290	NA	A1	22.4663	3.01461	0.846009	0.752137	tair.spec
AT1G18300	NUDT4	A1	286.169	20.2998	27.5064	18.7272	Ortho.DEG
AT1G18320	NA	A4	3.05733	18.1003	23.2566	23.984	tair.spec
AT1G18330	RVE7	A1	141.736	7.25102	14.9186	17.9091	Ortho.DEG
AT1G18340	TFB4	A6	6.59531	16.611	23.9242	23.3526	Ortho.DEG
AT1G18360	NA	A6	6.37223	11.8335	19.305	17.6781	Ortho.DEG
AT1G18370	KIN7A	A4	4.21235	108.447	95.6148	97.6738	Ortho.DEG
AT1G18390	NA	A1	12.7765	5.76246	2.40683	2.40072	Ortho.DEG
AT1G18400	BEE1	A1	9.60199	0.204971	0.347165	0.164906	tair.spec
AT1G18460	NA	A1	53.0023	7.93596	18.1867	24.6833	Ortho.DEG
AT1G18470	NA	A1	117.77	20.7661	15.6344	15.6623	Ortho.DEG
AT1G18480	SLP2	A4	19.5592	69.0699	63.3016	58.9384	Ortho.DEG
AT1G18485	PCMP-H8	A6	0.978435	1.99301	2.75145	3.52407	Ortho.DEG
AT1G18540	RPL6A	A4	86.2646	1130.32	1149.74	1099.85	Ortho.DEG
AT1G18550	KIN8A	A4	2.48958	24.6742	28.093	27.6691	Ortho.DEG
AT1G18560	NA	A6	4.10027	8.89476	12.2854	13.1623	tair.spec
AT1G18570	MYB51	A1	207.824	11.6016	11.16	9.00532	tair.spec
AT1G18590	SOT17	A6	7.65633	10.1762	35.8043	47.5842	Ortho.DEG
AT1G18600	RBL12	A4	9.97455	26.2762	27.0563	23.5624	Ortho.DEG
AT1G18620	NA	A2	15.8736	9.157	12.5088	13.4582	Ortho.DEG
AT1G18630	RBG6	A4	8.94498	33.288	37.8834	36.4925	Ortho.DEG
AT1G18640	PSP	A4	8.58172	26.7445	30.9101	30.0481	Ortho.DEG
AT1G18650	PDCB3	A6	2.85565	25.2177	50.0487	57.5989	Ortho.DEG
AT1G18660	NA	A1	45.2921	28.629	28.2583	32.598	Ortho.Not.DEG
AT1G18670	IBS1	A3	4.50116	63.1509	30.1699	27.3389	Ortho.DEG
AT1G18710	AtMYB47	A1	3.20094	0.0963855	0.0793817	0	tair.spec
AT1G18720	NA	A5	113.01	91.1332	38.8273	32.9486	tair.spec
AT1G18730	PNSB4	A1	3.41738	0.943607	0.088103	0.0370928	tair.spec
AT1G18740	NA	A1	443.718	46.3969	98.5529	75.4963	Ortho.DEG
AT1G18745	NA	A4	4.41886	10.9291	13.1681	10.8172	tair.spec
AT1G18773	NA	A1	19.509	2.90313	4.7711	4.80155	tair.spec
AT1G18790	RKD1	A1	4.52441	0.035299	0	0	Ortho.Not.DEG
AT1G18800	NRP2	A4	58.1575	191.117	202.11	199.699	Ortho.DEG
AT1G18810	PKS3	A1	3.61439	0.0750972	0.142072	0.0178567	tair.spec
AT1G18830	SEC31A	A3	0.11778	2.60221	0.329222	0.175909	Ortho.Not.DEG
AT1G18840	IQD30	A6	6.62862	24.2797	35.6896	39.2578	Ortho.DEG
AT1G18850	NA	A4	8.16455	55.043	57.001	49.8862	tair.spec
AT1G18860	WRKY61	A3	0.763639	1.96572	0.739395	0.483033	tair.spec
AT1G18870	ICS2	A1	13.8655	0.209312	1.41089	1.13277	Ortho.Not.DEG
AT1G18880	NPF2.9	A1	53.9115	20.7115	8.29354	6.05653	Ortho.DEG
AT1G18890	CPK10	A1	31.6682	20.6459	22.4454	22.728	Ortho.DEG
AT1G18910	NA	A2	22.1979	8.74401	18.2399	24.2786	tair.spec
AT1G18940	NA	A3	0.959248	1.56532	0.504424	0.155691	Ortho.DEG
AT1G18950	NA	A6	23.9242	50.6446	68.1975	70.0501	tair.spec
AT1G18990	MYOB5	A1	3.03765	0	0.0415956	0.166173	Ortho.DEG
AT1G19000	NA	A1	372.344	59.1594	92.328	100.439	tair.spec
AT1G19020	NA	A1	439.405	29.3402	11.632	7.0955	tair.spec
AT1G19025	NA	A1	11.1826	5.00559	3.58368	2.8657	Ortho.DEG
AT1G19050	ARR7	A4	3.72324	15.4258	16.5676	17.9465	Ortho.DEG
AT1G19080	TTN10	A6	6.60705	17.5627	26.5697	28.1807	Ortho.DEG
AT1G19100	MORC6	A6	9.17642	17.6998	28.7268	30.457	Ortho.DEG
AT1G19110	NA	A1	114.501	44.8498	58.2288	67.7743	Ortho.DEG
AT1G19115	NA	A6	0.0469788	9.23984	25.6424	34.7916	tair.spec
AT1G19140	NA	A6	10.9272	28.6146	39.8694	40.9726	Ortho.DEG
AT1G19150	LHCA6	A1	1.36742	0	0	0.0492214	Ortho.DEG
AT1G19160	NA	A6	0	0.515702	1.33595	1.34834	Ortho.Not.DEG
AT1G19180	TIFY10A	A1	710.772	130.246	133.653	104.083	tair.spec
AT1G19190	CXE1	A4	0.980294	6.69644	6.0723	6.02434	Ortho.DEG
AT1G19200	FLZ12	A3	3.34871	33.9041	4.58813	2.23062	tair.spec
AT1G19210	ERF017	A1	53.5056	3.38158	2.45129	1.87707	Ortho.DEG
AT1G19230	RBOHE	A3	2.32988	53.8093	7.02742	4.53299	Ortho.DEG
AT1G19250	FMO1	A6	0.0285308	0.113765	5.5632	8.90182	Ortho.DEG
AT1G19270	DA1	A5	41.3314	32.6113	15.9169	16.9342	Ortho.DEG
AT1G19290	NA	A4	3.52771	15.1047	21.2336	21.6619	Ortho.DEG
AT1G19300	GATL1	A3	8.37235	18.4019	4.71561	4.31205	Ortho.DEG
AT1G19310	NA	A2	29.7526	15.0132	24.652	22.2206	Ortho.DEG
AT1G19330	NA	A1	16.4664	10.5485	11.8583	10.6388	tair.spec
AT1G19340	NA	A4	2.79878	13.0265	12.9238	12.2317	Ortho.DEG
AT1G19350	BES1	A1	109.51	26.8816	34.7962	36.3536	Ortho.DEG
AT1G19380	NA	A1	126.618	20.9491	9.1623	7.49523	tair.spec
AT1G19394	NA	A1	8.24967	2.31666	2.51939	4.41372	tair.spec
AT1G19396	NA	A1	10.4867	1.9859	3.72044	3.40934	tair.spec
AT1G19397	NA	A1	14.3775	5.05439	6.30263	7.18626	tair.spec
AT1G19400	NA	A1	215.05	15.4582	19.7592	18.8734	Ortho.DEG
AT1G19440	KCS4	A4	8.62011	38.0412	38.265	39.7392	Ortho.DEG
AT1G19450	NA	A5	15.622	12.4389	9.89357	10.5226	Ortho.DEG
AT1G19490	NA	A6	3.99451	8.4634	14.4752	14.3368	tair.spec
AT1G19500	NA	A3	0	2.95667	0	0.0410491	tair.spec
AT1G19520	NFD5	A4	11.3537	68.498	76.0797	75.6629	Ortho.Not.DEG
AT1G19530	NA	A1	3371.66	8.61173	20.378	27.6193	tair.spec
AT1G19540	NA	A1	44.8773	0.354815	0.404171	0.357286	Ortho.DEG
AT1G19570	DHAR1	A1	269.31	169.891	187.486	155.309	Ortho.DEG
AT1G19610	PDF1.4	A2	2.15558	0.102124	2.62807	3.71972	tair.spec
AT1G19660	BBD2	A1	305.815	5.7516	16.9321	19.9604	Ortho.Not.DEG
AT1G19670	CLH1	A1	2.87808	0.105566	0.123983	0.100183	Ortho.Not.DEG
AT1G19680	NA	A2	59.209	31.5662	60.1298	63.5529	Ortho.DEG
AT1G19690	NA	A4	2.99539	16.7468	22.8451	25.005	Ortho.DEG
AT1G19700	BLH10	A1	26.1503	8.5328	3.74157	4.33985	Ortho.DEG
AT1G19710	NA	A4	6.92132	22.7049	23.4088	26.7115	Ortho.Not.DEG
AT1G19715	JAL3	A1	28.0107	3.57549	4.956	5.88364	Ortho.Not.DEG
AT1G19720	DYW7	A1	28.8956	3.95811	5.7542	6.98872	Ortho.Not.DEG
AT1G19730	TRX4	A6	6.51707	29.6506	50.5617	54.1474	Ortho.DEG
AT1G19740	NA	A2	41.2498	16.1166	27.0797	28.6057	Ortho.DEG
AT1G19770	PUP14	A1	947.57	92.7816	119.972	89.2323	Ortho.DEG
AT1G19790	SRS7	A4	0.233514	40.7375	54.6469	48.5815	tair.spec
AT1G19835	FPP4	A1	47.0337	13.1663	6.61897	7.50326	tair.spec
AT1G19840	NA	A6	0.144472	3.18178	5.94814	5.50132	Ortho.DEG
AT1G19850	ARF5	A6	9.80402	66.0551	193.887	241.852	Ortho.DEG
AT1G19880	NA	A4	38.2072	95.1206	120.986	128.99	Ortho.DEG
AT1G19910	VHA-C2	A1	314.752	149.619	75.0235	68.1404	Ortho.DEG
AT1G19940	AtGH9B5	A3	0.657297	2.99075	0.189565	0.149959	Ortho.DEG
AT1G19950	HVA22H	A4	3.27855	21.71	23.1017	24.5179	Ortho.DEG
AT1G19960	NA	A6	0.107275	0.0338042	2.27575	3.85738	tair.spec
AT1G19970	NA	A4	1.98942	20.0488	27.8501	27.2683	Ortho.DEG
AT1G19980	NA	A6	7.61123	15.2445	20.1514	22.7328	tair.spec
AT1G19990	NA	A4	3.40542	59.292	75.8093	78.1349	Ortho.DEG
AT1G20010	TUBB5	A2	88.9751	29.1992	50.0672	53.2144	tair.spec
AT1G20015	NA	A3	0.277529	10.8336	3.23142	3.91495	tair.spec
AT1G20020	LFNR2	A1	35.7599	1.58221	1.39366	1.49555	Ortho.Not.DEG
AT1G20030	NA	A6	1.44282	8.78947	14.8413	16.5182	Ortho.DEG
AT1G20060	NA	A4	3.50262	20.1209	21.5069	23.3369	Ortho.Not.DEG
AT1G20065	NA	A4	0.07255	3.47766	4.64693	5.05888	tair.spec
AT1G20090	ARAC4	A1	95.6328	60.3121	63.3414	67.6842	Ortho.Not.DEG
AT1G20110	FREE1	A1	104.003	53.3042	41.8127	45.6221	Ortho.DEG
AT1G20140	ASK4	A4	18.709	69.6554	61.4341	59.9849	Ortho.DEG
AT1G20160	CRSP	A1	12.7962	0.739995	0.0711277	0.0320251	Ortho.Not.DEG
AT1G20180	NA	A1	1.40784	0.30959	0.474651	0.243683	Ortho.Not.DEG
AT1G20190	EXPA11	A1	4.60322	0.0239817	0.580752	0.427829	Ortho.DEG
AT1G20200	RPN3A	A4	47.3168	119.488	120.999	116.977	Ortho.Not.DEG
AT1G20220	NA	A4	26.7692	322.164	303.69	282.872	Ortho.DEG
AT1G20225	NA	A1	140.617	58.542	33.0607	36.2083	tair.spec
AT1G20230	PCMP-H21	A4	1.25843	5.03877	5.24759	4.83324	Ortho.Not.DEG
AT1G20260	VHA-B3	A1	159.49	92.0871	74.9047	78.5703	Ortho.DEG
AT1G20300	NA	A4	6.34301	28.8806	28.7387	30.561	tair.spec
AT1G20310	NA	A5	4.6591	2.0351	0.113806	0.0686209	tair.spec
AT1G20340	DRT112	A1	122.051	1.63921	2.16512	2.85465	tair.spec
AT1G20370	NA	A4	6.09036	40.872	46.424	45.1895	Ortho.DEG
AT1G20380	NA	A6	0.928743	11.3042	20.8177	19.6253	Ortho.DEG
AT1G20410	NA	A4	6.89342	39.3768	43.6327	42.9957	Ortho.Not.DEG
AT1G20430	NA	A4	11.9841	62.5651	66.7318	59.8868	tair.spec
AT1G20440	COR47	A1	4188.44	29.9854	80.825	211.281	tair.spec
AT1G20450	ERD10	A1	877.831	189.465	153.39	292.649	tair.spec
AT1G20470	NA	A6	0.840871	2.96852	8.1027	9.97566	Ortho.Not.DEG
AT1G20480	4CLL2	A6	3.02339	13.563	33.0134	38.8332	Ortho.DEG
AT1G20490	NA	A6	10.1953	6.83394	17.4196	18.8325	tair.spec
AT1G20510	4CLL5	A1	174.805	33.999	27.2805	25.6337	Ortho.DEG
AT1G20570	NA	A6	0.447318	3.50748	6.36234	6.98165	Ortho.Not.DEG
AT1G20580	SMD3B	A4	60.2251	200.328	221.298	221.592	tair.spec
AT1G20610	CYCB2-3	A4	15.5178	55.3359	58.3727	53.5966	tair.spec
AT1G20620	CAT3	A1	4076.74	67.1379	101.247	95.8664	Ortho.DEG
AT1G20630	CAT1	A2	120.279	61.1946	90.4553	97.557	Ortho.Not.DEG
AT1G20640	NLP4	A4	4.42821	22.4986	18.1782	18.422	Ortho.DEG
AT1G20650	PBL21	A1	28.6731	7.02382	11.1966	12.1984	Ortho.Not.DEG
AT1G20700	WOX14	A3	1.73849	11.9553	3.34438	2.96902	tair.spec
AT1G20720	NA	A4	1.90239	17.3854	20.9972	21.2472	Ortho.DEG
AT1G20780	PUB44	A1	39.0421	15.8414	12.1516	11.3647	Ortho.DEG
AT1G20810	FKBP18	A2	18.9082	5.90804	11.302	13.0633	Ortho.DEG
AT1G20816	OEP21A	A4	6.54101	13.7217	19.5205	15.9012	tair.spec
AT1G20823	ATL80	A1	109.637	30.0577	25.0966	15.9722	Ortho.DEG
AT1G20840	MSSP1	A5	34.4896	23.7565	12.6485	11.9372	tair.spec
AT1G20850	XCP2	A3	68.1037	172.017	20.1991	11.7888	Ortho.DEG
AT1G20870	IDM3	A4	0.280069	2.68684	3.72784	4.14132	tair.spec
AT1G20880	NA	A1	35.4057	9.77696	8.71422	10.6487	Ortho.DEG
AT1G20890	NA	A1	24.1348	10.7803	13.0252	15.0389	tair.spec
AT1G20930	CDKB2-2	A4	14.8071	60.6964	62.6275	59.5557	Ortho.DEG
AT1G20950	PFP-ALPHA1	A4	12.0394	127.699	127.027	129.005	Ortho.DEG
AT1G20970	NA	A1	61.2346	37.0702	30.8471	35.7007	Ortho.DEG
AT1G20980	SPL14	A1	59.2276	37.5185	37.2547	42.8156	Ortho.DEG
AT1G21000	NA	A1	189.772	35.1578	37.474	36.8076	Ortho.DEG
AT1G21010	NA	A1	25.2336	10.1671	8.56341	6.16634	tair.spec
AT1G21065	NA	A1	73.2639	34.2822	46.8692	45.4465	Ortho.DEG
AT1G21080	NA	A1	196.844	57.2532	48.1275	48.3272	Ortho.DEG
AT1G21090	NA	A6	29.5107	55.9063	103.39	109.219	tair.spec
AT1G21100	IGMT1	A1	360.303	0.650857	0.135243	0.256965	tair.spec
AT1G21110	IGMT3	A1	5.49118	1.40739	1.13618	1.07406	tair.spec
AT1G21120	NA	A1	12.7181	4.67444	2.31742	1.9353	tair.spec
AT1G21130	IGMT4	A1	216.54	3.2112	1.81133	1.14562	tair.spec
AT1G21140	NA	A5	8.71825	4.51036	1.14064	0.599705	Ortho.Not.DEG
AT1G21150	NA	A6	0.525452	7.35297	11.6415	12.4321	Ortho.Not.DEG
AT1G21200	NA	A1	27.9301	10.0837	12.5966	12.7885	Ortho.DEG
AT1G21210	WAK4	A1	2.56469	0.294311	0.582907	0.372591	tair.spec
AT1G21250	WAK1	A6	0.124246	0.0222174	0.950896	1.69297	tair.spec
AT1G21310	EXT3	A6	76.3688	24.8105	299.839	333.079	tair.spec
AT1G21326	NA	A2	2.89766	0.510293	2.53779	0.838099	tair.spec
AT1G21340	DOF1.2	A6	0.146625	1.70118	2.46271	6.64476	tair.spec
AT1G21350	NA	A6	6.1444	14.4448	21.6236	24.2018	Ortho.DEG
AT1G21360	GLTP2	A1	60.2267	3.67475	0.687	0.507984	Ortho.DEG
AT1G21370	NA	A5	23.0913	20.0473	18.1843	16.741	tair.spec
AT1G21380	TOL3	A5	89.9825	57.1752	36.6694	35.5396	Ortho.Not.DEG
AT1G21390	emb2170	A3	8.11076	40.0008	23.3189	21.1098	tair.spec
AT1G21400	NA	A1	181.331	1.09089	0.629987	0.649199	Ortho.DEG
AT1G21410	SKP2A	A1	67.1093	5.4545	10.6826	12.2657	Ortho.DEG
AT1G21440	NA	A6	3.21516	27.947	45.3716	49.4131	tair.spec
AT1G21450	SCL1	A1	60.5876	28.3437	29.8117	31.4329	Ortho.DEG
AT1G21460	SWEET1	A2	15.9677	0.473774	15.3798	25.1544	Ortho.DEG
AT1G21500	NA	A1	10.0558	0.142001	0	0	tair.spec
AT1G21510	NA	A1	9.57374	5.14478	2.75169	3.19584	tair.spec
AT1G21520	NA	A1	19.8373	7.97413	9.25176	8.56345	tair.spec
AT1G21528	NA	A1	4.09752	0.329951	0.287089	0	tair.spec
AT1G21560	NA	A6	4.2747	38.1475	62.6426	62.4236	tair.spec
AT1G21590	NA	A2	14.6567	5.45586	11.3822	13.7546	Ortho.DEG
AT1G21600	PTAC6	A1	85.2333	19.559	22.2559	25.1945	tair.spec
AT1G21630	NA	A1	106.778	60.93	57.6096	64.7484	Ortho.DEG
AT1G21650	SECA2	A4	3.14282	10.1446	9.07168	9.56285	Ortho.DEG
AT1G21660	NA	A1	59.1847	37.9258	38.3888	42.1283	Ortho.Not.DEG
AT1G21670	NA	A1	119.091	4.57044	5.28404	4.34436	Ortho.DEG
AT1G21680	NA	A1	526.045	7.37013	10.5948	10.7635	Ortho.DEG
AT1G21690	EMB1968	A6	17.0871	48.601	75.0049	77.4065	Ortho.Not.DEG
AT1G21695	NA	A2	2.8864	2.33736	1.97283	3.049	tair.spec
AT1G21710	OGG1	A6	10.958	29.1657	40.272	39.9081	Ortho.Not.DEG
AT1G21720	PBC1	A4	62.5652	174.797	144.651	149.033	Ortho.Not.DEG
AT1G21730	KIN7C	A2	30.4494	19.044	34.0883	39.5026	Ortho.Not.DEG
AT1G21740	NA	A6	1.13462	27.583	69.7379	80.4299	Ortho.DEG
AT1G21750	PDIL1-1	A3	69.3341	328.428	130.925	129.202	Ortho.DEG
AT1G21760	SKIP32	A1	68.2101	25.5022	27.819	27.592	Ortho.DEG
AT1G21770	NA	A1	15.3334	5.47903	7.12325	4.69285	Ortho.Not.DEG
AT1G21780	NA	A1	133.298	32.5288	23.985	26.3127	Ortho.DEG
AT1G21810	FPP2	A4	0.189916	3.99073	4.99143	5.2379	Ortho.DEG
AT1G21830	NA	A2	57.0994	17.9341	29.632	37.2523	tair.spec
AT1G21840	UREF	A6	3.77042	6.15951	9.20104	12.074	Ortho.Not.DEG
AT1G21880	LYM1	A6	8.9679	68.8648	94.6049	105.647	tair.spec
AT1G21900	NA	A5	68.566	63.6435	31.5419	30.6187	Ortho.DEG
AT1G21910	ERF012	A5	53.9375	40.4315	13.7529	7.55583	Ortho.DEG
AT1G21920	NA	A1	139.931	35.0356	58.3694	59.5532	Ortho.DEG
AT1G21930	NA	A6	20.1422	41.8722	56.9733	56.9079	Ortho.DEG
AT1G21990	NA	A3	0.272514	3.5386	1.66742	1.45394	tair.spec
AT1G22020	SHM6	A1	40.7285	20.3108	21.4689	22.5356	tair.spec
AT1G22030	NA	A6	4.98415	48.0076	84.6457	110.587	Ortho.DEG
AT1G22040	NA	A2	13.3155	8.37049	11.0606	11.1868	Ortho.DEG
AT1G22050	MUB6	A5	16.9486	10.784	7.78524	6.52338	Ortho.DEG
AT1G22060	NA	A4	7.05478	21.3549	23.3289	26.3008	tair.spec
AT1G22065	NA	A5	19.8049	14.341	2.13525	1.92018	tair.spec
AT1G22110	NA	A5	3.0831	2.78157	0.664985	0.552259	tair.spec
AT1G22140	NA	A1	28.8376	18.9059	17.2437	18.2401	Ortho.DEG
AT1G22160	FLZ5	A6	12.2589	9.27487	22.566	21.2124	tair.spec
AT1G22170	NA	A4	2.47875	34.2597	35.219	39.484	Ortho.DEG
AT1G22180	NA	A1	20.2919	9.18231	6.48906	6.4761	Ortho.DEG
AT1G22190	RAP2-13	A2	222.741	93.2727	183.888	182.471	tair.spec
AT1G22210	TPPC	A6	0	0.0724869	0.449294	1.83201	Ortho.DEG
AT1G22220	NA	A4	1.50941	8.82575	7.6557	8.99858	Ortho.DEG
AT1G22230	NA	A1	29.9984	2.19846	1.54552	1.27751	tair.spec
AT1G22260	ZYP1A	A4	0.190953	2.67415	3.73307	3.77462	tair.spec
AT1G22275	ZYP1B	A1	2.55938	1.4536	1.70488	1.74897	tair.spec
AT1G22280	PAPP2C	A5	126.85	88.3133	60.0278	53.7578	Ortho.Not.DEG
AT1G22330	NA	A1	7.06794	1.33456	0	0	tair.spec
AT1G22370	UGT85A5	A1	49.158	0.438843	0.538866	0.802871	Ortho.DEG
AT1G22400	UGT85A1	A6	2.21885	3.32484	43.9226	75.7729	Ortho.DEG
AT1G22410	NA	A3	57.001	300.783	155.284	160.357	tair.spec
AT1G22430	NA	A1	10.0603	0.199331	0.285834	0.305954	Ortho.DEG
AT1G22440	NA	A4	6.33022	61.6868	61.3873	58.7919	Ortho.DEG
AT1G22450	COX6B-1	A4	47.9553	168.358	154.885	145.36	Ortho.DEG
AT1G22460	OFUT7	A4	0.288939	1.83828	3.04975	2.59108	Ortho.DEG
AT1G22470	NA	A1	9.70139	2.56178	3.67033	5.49129	tair.spec
AT1G22490	NA	A5	7.02843	6.61845	0.265917	0.378662	tair.spec
AT1G22500	ATL15	A1	22.2888	5.57977	1.24303	0.903609	Ortho.DEG
AT1G22520	NA	A4	18.1489	46.304	40.8206	42.1327	Ortho.DEG
AT1G22530	PATL2	A1	631.483	57.655	16.7087	13.1095	Ortho.DEG
AT1G22550	NPF5.16	A5	48.9461	23.9547	8.20293	8.9627	Ortho.DEG
AT1G22570	NPF5.15	A1	61.6049	4.33838	9.68452	10.4629	Ortho.DEG
AT1G22620	SAC1	A1	18.3344	6.90671	7.59293	7.65579	Ortho.DEG
AT1G22630	NA	A1	3.84201	0	0	0	Ortho.DEG
AT1G22640	MYB3	A1	60.6172	2.80211	3.287	3.93829	Ortho.DEG
AT1G22660	NA	A6	6.77408	19.3542	26.9322	28.8648	Ortho.DEG
AT1G22690	GASA9	A1	3.78405	1.04931	0.908329	0.450676	tair.spec
AT1G22710	SUC2	A1	89.3509	7.05078	8.78839	8.26324	tair.spec
AT1G22740	RABG3B	A1	107.303	0.494992	2.91682	3.78363	Ortho.DEG
AT1G22750	NA	A1	29.8974	10.6678	13.5774	15.4125	Ortho.DEG
AT1G22770	GI	A1	121.64	36.9344	33.3813	40.294	tair.spec
AT1G22780	RPS18C	A4	72.3387	833.438	907.241	829.965	Ortho.DEG
AT1G22830	PCMP-E24	A1	13.3271	6.02662	7.25166	7.00236	Ortho.DEG
AT1G22840	CYTC-1	A4	89.6919	435.108	332.011	287.42	Ortho.DEG
AT1G22850	NA	A1	46.9721	18.5017	19.9982	23.5368	Ortho.Not.DEG
AT1G22870	NA	A2	25.937	13.0687	18.904	21.4373	Ortho.Not.DEG
AT1G22880	CEL5	A4	18.0014	73.5744	46.8045	63.1298	Ortho.DEG
AT1G22882	SUN3	A5	29.7948	23.4538	12.107	15.9155	Ortho.DEG
AT1G22885	NA	A5	20.5223	9.40304	2.19047	1.42761	tair.spec
AT1G22890	NA	A1	21.3158	0.394826	2.2374	2.27386	tair.spec
AT1G22910	NA	A5	38.1904	23.5461	12.0473	10.751	Ortho.DEG
AT1G22920	CSN5A	A4	19.2202	50.0593	56.2788	50.5769	Ortho.Not.DEG
AT1G22930	NA	A1	229.122	55.8917	39.8737	42.6834	Ortho.DEG
AT1G22950	NA	A4	10.0571	37.1267	48.0369	46.9918	Ortho.Not.DEG
AT1G22960	NA	A4	5.19887	15.2656	16.79	15.9618	Ortho.DEG
AT1G22980	NA	A4	0.239331	8.66847	13.5038	12.7073	Ortho.DEG
AT1G22985	ERF069	A1	22.4828	7.78353	6.1863	6.32474	Ortho.Not.DEG
AT1G22990	HIPP22	A3	16.108	43.3285	5.92795	4.53746	Ortho.DEG
AT1G23000	NA	A6	0.599605	29.1894	86.5504	101.404	Ortho.DEG
AT1G23010	LPR1	A4	1.04538	25.5486	28.536	30.753	Ortho.DEG
AT1G23020	FRO3	A5	25.2699	34.9402	7.3875	7.01628	tair.spec
AT1G23030	PUB11	A5	30.4747	34.9108	11.2201	13.137	Ortho.DEG
AT1G23040	NA	A5	34.7237	29.8909	3.87916	5.01712	tair.spec
AT1G23080	PIN7	A4	27.2974	247.719	156.313	165.756	Ortho.DEG
AT1G23090	SULTR3;3	A1	14.3495	0.522634	0.574792	0.415497	Ortho.DEG
AT1G23100	NA	A4	1.52607	49.7199	43.1367	38.0958	Ortho.DEG
AT1G23110	NA	A6	0	0.375565	1.6412	0.777479	tair.spec
AT1G23120	NA	A1	44.2718	6.15063	2.76022	1.7373	tair.spec
AT1G23140	CAR8	A4	0.843364	6.66072	10.5589	9.78494	Ortho.DEG
AT1G23150	NA	A3	42.4317	192.74	102.257	105.097	tair.spec
AT1G23160	NA	A6	0	0.0982808	4.42814	13.2549	tair.spec
AT1G23170	NA	A4	1.86322	20.6045	25.6771	29.8136	Ortho.DEG
AT1G23180	NA	A4	4.556	13.8718	16.687	16.6757	Ortho.Not.DEG
AT1G23200	PME6	A3	0.118346	5.88181	0.589393	0.601807	tair.spec
AT1G23205	NA	A1	6.67522	0.912268	0	0	Ortho.Not.DEG
AT1G23220	NA	A4	16.194	51.3735	54.0203	58.3852	Ortho.DEG
AT1G23280	NA	A4	16.3018	160.215	150.936	140.611	Ortho.DEG
AT1G23310	GGAT1	A1	219.363	29.2241	56.7251	63.3705	Ortho.DEG
AT1G23340	NA	A6	1.46975	5.25798	32.8772	43.1213	tair.spec
AT1G23350	NA	A6	0.124092	0.0488489	1.12074	1.8295	tair.spec
AT1G23390	NA	A1	79.3892	9.7446	12.6263	12.4722	tair.spec
AT1G23400	CAF2	A2	12.1805	6.56371	8.99595	9.59468	Ortho.Not.DEG
AT1G23440	NA	A1	68.3413	26.0545	16.6877	15.4821	tair.spec
AT1G23450	NA	A4	0.949973	3.05064	4.11806	4.22927	tair.spec
AT1G23460	NA	A3	6.9761	38.1223	8.43077	6.94173	Ortho.Not.DEG
AT1G23465	NA	A6	1.64095	3.83966	6.01909	7.03221	Ortho.DEG
AT1G23490	ARF2-A	A5	255.184	205.35	155.12	147.097	tair.spec
AT1G23510	NA	A3	0.138356	35.752	1.38866	0.72737	Ortho.DEG
AT1G23520	NA	A3	0.0642859	56.5887	1.33962	0.238393	Ortho.DEG
AT1G23530	NA	A1	12.4145	1.78201	2.30097	0.873966	tair.spec
AT1G23550	SRO2	A5	8.67517	5.94906	1.99591	1.31293	tair.spec
AT1G23560	NA	A3	0.667192	39.4353	6.01519	5.12199	Ortho.DEG
AT1G23710	NA	A1	239.253	11.8393	18.3932	13.9043	tair.spec
AT1G23720	NA	A5	1.53789	0.645941	0.0714244	0.206205	tair.spec
AT1G23730	BCA3	A1	1.06423	0.056641	0.0930818	0.173424	Ortho.DEG
AT1G23740	AOR	A1	17.7234	0.760526	0.665119	1.20688	Ortho.DEG
AT1G23750	NA	A6	1.87342	12.2626	22.0877	21.5901	tair.spec
AT1G23760	PGL1	A2	58.7329	11.2992	54.6783	75.9731	tair.spec
AT1G23780	SKIP22	A1	54.426	39.2602	38.8081	36.7537	tair.spec
AT1G23790	NA	A4	2.03129	22.9828	25.0189	23.7576	Ortho.DEG
AT1G23800	ALDH2B7	A1	124.163	20.5348	3.89076	3.19379	Ortho.DEG
AT1G23840	NA	A2	0.883666	0	1.02905	1.32585	tair.spec
AT1G23850	NA	A1	21.3063	5.3542	6.29944	7.04377	tair.spec
AT1G23870	TPS9	A1	242.212	21.2014	82.9499	86.5053	tair.spec
AT1G23880	NA	A6	1.80672	4.27885	9.32432	9.35111	Ortho.DEG
AT1G23935	NA	A6	0.580184	5.15467	10.4529	12.0547	Ortho.Not.DEG
AT1G23960	NA	A2	69.2596	40.4697	49.836	53.3079	tair.spec
AT1G23980	ATL47	A4	1.99175	6.82417	8.50168	9.35753	Ortho.DEG
AT1G24030	PBL28	A3	2.92758	11.3496	2.56499	1.9513	Ortho.Not.DEG
AT1G24040	NA	A2	11.9206	7.47485	11.7788	13.9004	Ortho.Not.DEG
AT1G24090	NA	A4	0.901305	9.79166	11.196	10.7344	tair.spec
AT1G24095	NA	A4	0.966406	25.0798	20.9002	22.6865	Ortho.DEG
AT1G24100	UGT74B1	A2	67.497	34.1432	57.9663	74.4143	tair.spec
AT1G24130	NA	A1	3.25332	0.264231	0.929088	0.831872	Ortho.Not.DEG
AT1G24140	3MMP	A1	7.80684	0.20884	0.493579	0.606969	Ortho.DEG
AT1G24147	NA	A6	0	0	1.2612	1.61506	tair.spec
AT1G24150	ATFH4	A5	15.6703	12.9278	9.75178	10.1898	Ortho.DEG
AT1G24160	NA	A2	77.5725	13.5213	33.7953	42.3316	tair.spec
AT1G24170	GATL8	A1	69.4585	16.9841	13.4534	12.849	Ortho.DEG
AT1G24240	NA	A6	7.62734	20.763	29.6191	28.9435	Ortho.DEG
AT1G24265	NA	A6	1.31879	10.5048	15.6526	15.8475	Ortho.DEG
AT1G24270	NA	A6	0	0.0682008	0.684914	1.6103	tair.spec
AT1G24280	G6PD3	A4	2.95494	77.0577	46.6906	50.1283	Ortho.DEG
AT1G24290	NA	A6	0.808078	4.36497	5.94662	7.02892	tair.spec
AT1G24310	NUP54	A4	17.6326	98.0762	90.6571	87.3178	Ortho.Not.DEG
AT1G24320	GCS2	A6	0.171872	0.301002	1.71313	2.25829	Ortho.DEG
AT1G24330	PUB6	A1	11.6125	3.06615	5.02091	5.29394	Ortho.DEG
AT1G24350	NA	A1	23.4764	15.4126	14.2694	15.7108	Ortho.DEG
AT1G24360	NA	A4	48.9135	253.277	268.407	265.809	Ortho.DEG
AT1G24430	NA	A3	0.521916	137.01	9.75281	5.15593	tair.spec
AT1G24440	NA	A2	24.0081	10.207	18.263	20.2382	Ortho.DEG
AT1G24470	KCR2	A4	0.26354	2.07224	2.08927	2.2596	Ortho.DEG
AT1G24480	NA	A5	1.34461	1.07855	0.235783	0	Ortho.Not.DEG
AT1G24510	CCT5	A4	90.9188	394.086	462.661	441.601	Ortho.DEG
AT1G24530	NA	A3	17.9943	34.9644	12.4245	12.306	Ortho.DEG
AT1G24560	NA	A1	84.2606	31.6257	30.7442	29.8378	tair.spec
AT1G24575	NA	A2	2.76651	1.10355	3.22985	3.85603	tair.spec
AT1G24600	NA	A3	13.3774	26.0628	7.30179	9.29241	tair.spec
AT1G24620	CML25	A3	0.0237394	20.5446	0.614724	0.0527145	tair.spec
AT1G24880	NA	A5	1.90156	1.14571	0.549986	0.542979	tair.spec
AT1G25230	NA	A1	205.134	3.84806	5.53125	5.44638	Ortho.DEG
AT1G25260	NA	A4	39.2419	258.408	286.329	270.714	Ortho.DEG
AT1G25275	NA	A3	124.209	313.553	98.2575	103.996	tair.spec
AT1G25277	NA	A6	0.378365	2.73953	4.10023	6.16398	tair.spec
AT1G25280	TULP10	A3	59.2282	150.026	86.0619	86.9792	Ortho.DEG
AT1G25290	RBL10	A6	5.00029	8.58346	14.2688	16.012	Ortho.DEG
AT1G25310	MEE8	A4	0.263737	3.99944	2.51545	2.45875	tair.spec
AT1G25320	NA	A4	13.646	39.467	45.6281	50.3778	Ortho.DEG
AT1G25350	OVA9	A4	60.5533	160.28	154.983	160.746	Ortho.DEG
AT1G25360	PCMP-H74	A4	1.10159	6.26454	6.5895	7.02262	Ortho.DEG
AT1G25370	NA	A1	10.2896	6.81358	4.83421	6.23589	tair.spec
AT1G25375	NA	A4	3.43742	14.7114	18.4885	18.4684	Ortho.DEG
AT1G25390	LRK10L-1.1	A1	32.2696	9.56047	7.66586	7.84649	Ortho.DEG
AT1G25400	NA	A1	235.8	18.3754	11.8613	8.54869	tair.spec
AT1G25425	CLE43	A1	1.23215	0.0647373	0.0587687	0.0199912	tair.spec
AT1G25440	COL16	A1	9.25179	0.0889709	0.0150033	0.0329276	Ortho.Not.DEG
AT1G25450	KCS5	A4	6.83967	88.48	112.164	104.214	Ortho.DEG
AT1G25460	NA	A6	0.259823	0.647132	2.16111	3.39152	Ortho.Not.DEG
AT1G25510	NA	A6	0.814095	69.2357	105.66	111.261	tair.spec
AT1G25530	NA	A3	22.6696	187.046	33.8957	39.6932	Ortho.Not.DEG
AT1G25560	TEM1	A1	130.184	28.6285	39.9534	35.9658	tair.spec
AT1G25570	NA	A3	9.40138	84.6062	39.3624	42.3191	Ortho.DEG
AT1G25682	NA	A1	90.5492	38.601	40.1314	40.1667	Ortho.DEG
AT1G26100	CYB561D	A6	0.682201	7.94101	11.0967	12.7691	tair.spec
AT1G26120	ICMEL1	A5	15.6391	13.9978	10.8514	12.0515	Ortho.DEG
AT1G26190	TTM2	A4	6.2551	39.8636	31.1975	36.8821	Ortho.DEG
AT1G26200	NA	A3	0.299398	2.59908	0.703892	0.846071	tair.spec
AT1G26218	NA	A2	1.58505	0.964426	1.66852	1.10887	tair.spec
AT1G26230	CPN60B4	A5	1.89234	1.79118	1.65248	1.22531	Ortho.DEG
AT1G26233	SNOR95	A4	0.381588	10.3638	6.24054	7.85196	tair.spec
AT1G26260	BHLH76	A4	3.48928	31.7854	26.1069	26.8735	Ortho.DEG
AT1G26270	PI4KG5	A2	123.472	51.4408	83.5613	87.5243	Ortho.DEG
AT1G26330	NA	A4	0.885967	10.3974	15.1156	15.2093	tair.spec
AT1G26340	CB5-A	A4	17.6344	58.7281	48.4024	46.973	Ortho.DEG
AT1G26370	RID1	A4	10.9957	38.947	47.6438	48.0151	Ortho.Not.DEG
AT1G26440	UPS5	A1	53.8018	22.6186	28.033	34.0702	Ortho.DEG
AT1G26450	NA	A3	6.62184	29.5891	18.7052	18.494	Ortho.DEG
AT1G26460	NA	A4	15.3541	93.9504	98.6941	97.4422	Ortho.DEG
AT1G26470	NA	A4	16.5552	70.086	79.1024	74.6205	Ortho.Not.DEG
AT1G26500	NA	A4	0.694309	2.49528	2.98318	2.52156	Ortho.Not.DEG
AT1G26520	NA	A4	3.14904	25.5087	24.3622	24.6548	Ortho.DEG
AT1G26530	NA	A4	0.484667	3.82422	4.28638	3.50827	Ortho.DEG
AT1G26540	DUF3	A4	0.437501	12.1429	11.7504	9.65254	tair.spec
AT1G26560	BGLU40	A1	13.0599	0.409437	0.205183	0.123851	Ortho.DEG
AT1G26580	NA	A2	109.79	65.649	105.367	122.896	Ortho.Not.DEG
AT1G26610	NA	A6	0.415485	0.173911	1.05253	1.6455	tair.spec
AT1G26630	ELF5A-2	A4	740.548	2062.41	1844.48	1692.11	Ortho.DEG
AT1G26640	IPK	A6	14.8427	33.2595	53.8558	55.6525	Ortho.DEG
AT1G26665	NA	A2	246.156	84.4623	160.508	186.148	tair.spec
AT1G26670	VTI12	A1	377.427	47.4499	45.1836	41.6043	Ortho.DEG
AT1G26680	NA	A6	0.0469251	0.434604	22.6451	50.479	tair.spec
AT1G26690	NA	A5	33.2114	37.8402	19.427	22.0245	Ortho.Not.DEG
AT1G26720	NA	A3	0.0306269	113.62	14.3986	9.92708	tair.spec
AT1G26730	PHO1-H7	A3	18.3754	83.3447	39.1342	37.2138	tair.spec
AT1G26740	NA	A4	10.3428	90.3498	88.1786	85.2149	Ortho.Not.DEG
AT1G26750	NA	A4	14.9982	108.647	99.1344	94.2701	Ortho.DEG
AT1G26760	ATXR1	A4	0.671466	23.24	28.8295	27.7412	Ortho.DEG
AT1G26770	ATEXPA10	A6	1.44271	26.679	67.2408	96.1484	Ortho.DEG
AT1G26780	MYB117	A3	0.347926	1.47744	0.089614	0.555354	Ortho.DEG
AT1G26790	NA	A3	0.129757	8.77496	0.0415339	0	Ortho.DEG
AT1G26795	NA	A3	0	3.83666	0	0	tair.spec
AT1G26796	NA	A3	0	4.54704	0.0956324	0.218357	tair.spec
AT1G26800	MPSR1	A1	103.268	2.45671	8.51253	10.3723	Ortho.DEG
AT1G26820	RNS3	A3	10.687	345.252	30.5806	12.584	tair.spec
AT1G26840	ORC6	A4	1.41443	25.8906	20.8652	19.9274	Ortho.DEG
AT1G26870	FEZ	A6	0.0691933	3.76794	24.1443	40.7193	Ortho.Not.DEG
AT1G26880	RPL34A	A4	24.3541	237.339	248.663	218.704	Ortho.DEG
AT1G26900	PCMP-E54	A6	4.23959	9.90669	12.1796	14.5653	Ortho.Not.DEG
AT1G26910	RPL10B	A4	4.86161	77.4914	75.4759	64.11	Ortho.DEG
AT1G26930	NA	A6	6.22867	27.0408	63.4849	72.5582	Ortho.Not.DEG
AT1G26945	PRE6	A6	1.19969	3.01471	4.3351	5.229	tair.spec
AT1G26960	ATHB-23	A1	2.73319	0.233241	0.0195946	0.147633	Ortho.DEG
AT1G27000	NA	A5	96.148	86.4894	63.7701	62.2838	Ortho.DEG
AT1G27020	NA	A1	43.8359	3.66505	0.563923	0.374001	tair.spec
AT1G27030	NA	A1	166.878	23.2611	3.33445	1.28609	tair.spec
AT1G27050	ATHB54	A4	10.4668	56.9999	54.8015	50.0708	tair.spec
AT1G27060	NA	A4	1.70634	14.0768	14.5217	11.8884	tair.spec
AT1G27100	NA	A1	234.829	36.7682	67.7926	54.8295	Ortho.DEG
AT1G27110	NA	A6	1.4202	3.00922	5.76017	6.51698	Ortho.DEG
AT1G27120	GALT4	A6	1.41482	5.0476	8.30806	10.8454	Ortho.DEG
AT1G27150	NA	A1	88.2908	27.1574	39.2359	43.416	Ortho.DEG
AT1G27170	NA	A1	6.75214	3.28564	2.92069	3.35986	tair.spec
AT1G27180	NA	A1	6.24171	3.06769	3.36904	3.94259	tair.spec
AT1G27200	NA	A1	67.6487	8.51217	8.28442	7.28537	tair.spec
AT1G27290	NA	A1	404.433	38.9036	37.497	32.702	tair.spec
AT1G27310	NTF2A	A1	337.921	217.681	189.327	179.233	tair.spec
AT1G27320	AHK3	A1	123.451	28.1264	27.5449	29.5215	Ortho.DEG
AT1G27330	NA	A3	24.2187	118.791	70.3211	62.2519	Ortho.DEG
AT1G27350	NA	A4	17.6324	67.0727	52.2643	50.2952	Ortho.DEG
AT1G27360	SPL11	A6	1.60084	2.68638	5.00599	6.31348	Ortho.DEG
AT1G27380	RIC2	A1	3.19754	0.634131	0.0255607	0.0248051	tair.spec
AT1G27390	TOM20-2	A4	27.6255	194.736	190.662	195.171	Ortho.DEG
AT1G27400	RPL17A	A4	60.8934	922.036	1025.48	950.107	Ortho.Not.DEG
AT1G27410	NA	A6	7.51436	6.14175	14.1454	20.4116	Ortho.DEG
AT1G27420	NA	A6	5.64506	3.72091	9.07468	11.1988	Ortho.Not.DEG
AT1G27435	NA	A4	18.1806	72.8377	66.4051	66.5914	Ortho.DEG
AT1G27440	IRX10	A3	8.80979	28.9608	12.782	13.2479	Ortho.DEG
AT1G27450	APT1	A4	40.5347	205.561	179.818	178.548	Ortho.DEG
AT1G27460	NPGR1	A4	5.15889	20.7899	26.2327	25.4388	Ortho.DEG
AT1G27470	NA	A4	20.9337	64.1305	62.8637	63.1975	Ortho.DEG
AT1G27480	LCAT1	A1	3.37586	0.0962602	0	0.035874	Ortho.DEG
AT1G27510	EX2	A1	54.3343	26.4022	36.5024	36.4781	tair.spec
AT1G27520	MNS5	A1	78.1669	26.6182	32.4112	35.1428	Ortho.Not.DEG
AT1G27610	NA	A2	1.04697	0.271768	0.31946	0.938177	tair.spec
AT1G27650	U2AF35A	A2	190.346	106.15	147.64	153.969	Ortho.DEG
AT1G27660	BHLH110	A1	7.82469	0.287421	0.188741	0.110318	Ortho.Not.DEG
AT1G27670	NA	A1	116.119	0.667541	1.34962	0.704708	tair.spec
AT1G27680	APL2	A4	4.3305	27.3889	31.4307	33.7168	Ortho.DEG
AT1G27720	TAF4	A6	0.252193	1.70424	2.69131	2.91502	tair.spec
AT1G27730	ZAT10	A1	444.256	52.1493	56.6136	43.7573	Ortho.DEG
AT1G27752	NA	A2	41.7354	25.2373	31.4	32.2864	Ortho.Not.DEG
AT1G27760	SAT32	A1	116.225	68.146	61.7496	68.3586	Ortho.DEG
AT1G27770	ACA1	A1	185.65	35.6293	55.8949	46.8833	Ortho.DEG
AT1G27840	ATCSA-1	A2	30.8428	19.1671	24.61	26.7959	Ortho.Not.DEG
AT1G27880	RECQL5	A4	0.759311	12.9668	14.5898	15.2341	Ortho.DEG
AT1G27890	CAF1-4	A4	0.0494855	1.26327	1.71746	1.99803	Ortho.Not.DEG
AT1G27910	PUB45	A1	15.694	10.3153	8.51657	7.99872	Ortho.DEG
AT1G27921	NA	A2	5.04607	1.23831	3.222	4.70564	tair.spec
AT1G27950	LTPG1	A6	166.421	493.397	710.053	718.316	tair.spec
AT1G27980	DPL1	A5	61.8181	39.3954	16.1183	16.124	Ortho.DEG
AT1G28010	ABCB14	A6	0.931224	6.82644	34.6683	44.941	tair.spec
AT1G28050	COL15	A1	42.3798	29.9696	25.1285	24.861	tair.spec
AT1G28090	NA	A4	5.84962	17.9931	23.3508	23.8272	Ortho.DEG
AT1G28100	NA	A1	58.3239	8.01878	7.20549	7.41641	Ortho.DEG
AT1G28110	SCPL45	A6	5.41119	38.872	90.3054	92.2281	Ortho.DEG
AT1G28130	GH3.17	A3	19.4304	85.0825	47.0035	63.9673	tair.spec
AT1G28140	NA	A1	23.0025	7.98824	10.2065	11.3724	Ortho.DEG
AT1G28150	NA	A2	16.1114	7.58161	13.1162	12.0567	Ortho.Not.DEG
AT1G28190	NA	A2	33.9826	14.1274	45.5619	38.4206	tair.spec
AT1G28200	FIP1	A1	186.236	70.3272	59.8639	57.8	Ortho.DEG
AT1G28210	ATJ1	A4	4.95816	13.3187	14.8094	14.8124	Ortho.DEG
AT1G28230	PUP1	A5	22.1896	17.5038	0.644363	0.566954	Ortho.DEG
AT1G28240	NA	A1	46.1628	20.4089	18.5662	21.7737	Ortho.DEG
AT1G28260	SMG7L	A1	56.6269	11.1649	6.8143	8.71134	tair.spec
AT1G28290	AGP31	A3	22.2861	3764.97	1690.64	1786.52	tair.spec
AT1G28310	NA	A6	9.81163	53.1034	70.9969	91.6849	tair.spec
AT1G28330	DRM1	A1	1999.98	53.0263	99.8322	92.2606	tair.spec
AT1G28350	NA	A4	10.8827	45.4031	49.5417	48.531	Ortho.DEG
AT1G28360	ERF12	A4	1.2386	38.0112	35.3928	36.0259	Ortho.DEG
AT1G28370	ERF11	A1	89.2686	6.70158	19.033	11.2274	tair.spec
AT1G28380	NSL1	A1	176.086	19.2287	16.98	16.449	tair.spec
AT1G28390	NA	A4	6.47756	25.3467	19.4853	23.5437	Ortho.Not.DEG
AT1G28395	NA	A4	4.46385	54.498	60.4101	54.0553	tair.spec
AT1G28400	NA	A3	67.1371	502.883	255.761	249.313	tair.spec
AT1G28470	NAC010	A3	5.4511	24.5862	4.00999	2.0953	tair.spec
AT1G28480	GRXC9	A1	119.929	2.89174	7.46189	5.39458	Ortho.DEG
AT1G28510	NA	A4	10.9619	33.2005	30.6568	31.9276	tair.spec
AT1G28530	NA	A4	2.67719	16.3461	16.2597	15.1944	tair.spec
AT1G28540	NA	A1	15.0848	10.4626	9.38769	10.0613	tair.spec
AT1G28570	NA	A3	3.51714	8.78383	3.22467	3.14892	Ortho.DEG
AT1G28580	NA	A5	157.665	136.544	104.653	110.21	Ortho.DEG
AT1G28590	NA	A3	0.0346199	1.05225	0.127394	0.0192188	Ortho.DEG
AT1G28600	NA	A5	11.9871	7.29574	1.01745	0.928127	Ortho.DEG
AT1G28650	NA	A3	0.63128	25.4666	0.100615	0.0209353	Ortho.DEG
AT1G28660	NA	A1	95.4891	25.7618	4.03317	2.97622	Ortho.DEG
AT1G28670	ARAB-1	A5	21.4058	13.8035	4.30296	5.11299	Ortho.DEG
AT1G28680	NA	A3	3.11765	7.94752	4.21835	4.54902	Ortho.DEG
AT1G28765	NA	A1	31.5586	2.46459	3.89143	5.16415	tair.spec
AT1G28830	NA	A6	0.744157	5.72793	12.3867	14.7703	tair.spec
AT1G28840	NA	A4	0	5.12295	3.02116	7.82267	tair.spec
AT1G28930	NA	A1	38.2307	5.66855	4.19617	2.37115	tair.spec
AT1G28940	NA	A1	51.2891	4.00835	5.54487	12.7046	tair.spec
AT1G28950	NA	A1	24.3799	4.39146	2.49379	7.96361	tair.spec
AT1G28960	ATNUDT15	A1	94.8954	22.8071	32.1187	35.342	Ortho.DEG
AT1G28970	NA	A1	61.3374	3.95454	4.4191	6.68163	tair.spec
AT1G28980	NA	A1	34.4872	4.35673	10.3511	10.0359	tair.spec
AT1G28990	NA	A1	26.4882	2.1565	4.73825	4.40358	tair.spec
AT1G29020	NA	A3	0.0369078	1.53537	0.219268	0.41184	tair.spec
AT1G29025	NA	A5	16.2147	24.6881	0.312362	0.0786737	tair.spec
AT1G29040	NA	A4	7.32305	16.8939	20.6133	19.2869	Ortho.DEG
AT1G29050	TBL38	A1	44.7244	12.3991	1.86775	1.7916	tair.spec
AT1G29060	NA	A5	14.5437	13.4841	8.72008	9.29498	tair.spec
AT1G29070	RPL34	A1	57.1652	21.2251	27.8039	25.9459	Ortho.DEG
AT1G29090	NA	A3	0.699091	5.90848	0.10918	0.376808	Ortho.Not.DEG
AT1G29120	NA	A1	26.0764	15.8074	15.2322	17.8801	Ortho.DEG
AT1G29160	DOF1.5	A3	5.82146	11.2351	5.58969	4.78274	tair.spec
AT1G29170	SCAR3	A6	4.057	16.0188	38.4296	42.3846	Ortho.Not.DEG
AT1G29179	NA	A6	0.260522	1.15501	2.07601	2.88396	tair.spec
AT1G29180	NA	A4	0.0192938	0.725872	1.3056	1.06898	tair.spec
AT1G29195	NA	A3	2.96422	41.8544	20.8175	20.199	tair.spec
AT1G29200	OFUT8	A3	0.47958	2.39953	0.354307	0.218062	Ortho.DEG
AT1G29240	NA	A5	5.4355	5.00359	2.00434	3.04304	tair.spec
AT1G29250	NA	A4	12.6805	161.837	178.496	154.62	Ortho.Not.DEG
AT1G29260	PEX7	A1	80.2179	20.6325	24.6372	24.2468	Ortho.Not.DEG
AT1G29270	NA	A6	0.110876	3.83103	8.24575	8.40327	tair.spec
AT1G29280	WRKY65	A5	47.3358	46.702	24.0756	25.5337	Ortho.DEG
AT1G29290	CEP14	A3	1.01534	9.24766	4.45015	4.00389	tair.spec
AT1G29300	UNE1	A5	32.8823	24.0386	19.1612	17.367	Ortho.DEG
AT1G29310	NA	A4	15.6109	70.3117	51.2335	53.311	Ortho.DEG
AT1G29320	NA	A4	10.7786	63.3415	61.4697	61.873	Ortho.Not.DEG
AT1G29340	PUB17	A1	149.738	29.8156	27.4763	24.811	Ortho.DEG
AT1G29357	NA	A1	8.32744	5.13184	6.31053	5.95241	tair.spec
AT1G29380	NA	A1	5.77954	1.13407	2.06923	1.58517	Ortho.DEG
AT1G29390	COR413IM2	A1	14.5497	9.29099	8.62791	9.47814	Ortho.DEG
AT1G29395	COR413IM1	A1	7.74874	0	0	0.0272588	Ortho.DEG
AT1G29400	ML5	A1	113.085	45.2423	59.2385	60.027	tair.spec
AT1G29410	PAI3	A6	1.63032	7.99437	12.8266	15.1093	Ortho.DEG
AT1G29418	NA	A4	6.22862	53.508	62.7447	53.8984	tair.spec
AT1G29465	NA	A1	16.2053	4.398	3.87171	2.94851	tair.spec
AT1G29520	NA	A1	80.0077	6.18344	11.7114	7.39975	tair.spec
AT1G29530	NA	A6	2.44054	11.6517	19.1308	20.7375	tair.spec
AT1G29535	NA	A4	0.0178986	1.33712	1.41732	1.71027	tair.spec
AT1G29550	EIF4E3	A6	7.03447	17.3068	27.1466	25.992	Ortho.Not.DEG
AT1G29560	NA	A6	4.59938	3.13936	6.57006	9.22671	tair.spec
AT1G29590	EIF4E2	A6	1.34222	3.31158	6.33039	6.97386	Ortho.Not.DEG
AT1G29600	NA	A6	0.234408	0.358854	19.8055	20.4784	Ortho.DEG
AT1G29630	EXO1	A4	2.25207	33.1057	49.5844	47.2101	Ortho.DEG
AT1G29660	NA	A1	12.8797	1.14438	0.778077	0.454684	Ortho.DEG
AT1G29670	NA	A2	98.6574	20.2459	93.011	83.0001	Ortho.DEG
AT1G29690	CAD1	A1	83.2171	29.6303	29.0542	25.0256	tair.spec
AT1G29700	NA	A6	2.3268	5.62164	8.06268	8.18805	Ortho.Not.DEG
AT1G29730	NA	A6	0.362079	1.8391	5.16692	7.07604	tair.spec
AT1G29760	SEI2	A1	61.9304	16.4787	16.8703	18.2674	Ortho.DEG
AT1G29790	NA	A6	12.4933	35.5299	49.5706	53.5884	Ortho.DEG
AT1G29800	NA	A1	24.7255	15.112	11.3942	9.45529	Ortho.DEG
AT1G29810	PDL2	A4	9.6102	29.7885	35.7276	37.9553	Ortho.DEG
AT1G29830	NA	A6	0.023384	0.577315	0.653845	1.35678	Ortho.DEG
AT1G29840	NA	A4	3.2214	10.5929	15.3623	13.3148	Ortho.DEG
AT1G29860	WRKY71	A6	0.529057	1.47259	2.89645	2.4902	Ortho.DEG
AT1G29880	NA	A4	31.4632	163.889	161.827	149.985	Ortho.DEG
AT1G29890	NA	A4	8.09191	24.7947	22.9845	25.1788	Ortho.DEG
AT1G29900	CARB	A4	32.8017	142.004	163.384	167.644	Ortho.Not.DEG
AT1G29910	LHCB1.1	A1	21.1753	1.91073	0.85249	1.09218	Ortho.Not.DEG
AT1G29920	LHCB1.1	A1	18.9443	0.472221	0.187915	0.347195	Ortho.Not.DEG
AT1G29930	LHCB1.3	A1	1165	10.9484	1.08726	2.40698	Ortho.Not.DEG
AT1G29940	NRPA2	A4	27.7013	100.384	108.241	103.337	Ortho.Not.DEG
AT1G29960	NA	A6	2.25934	8.3559	12.0115	12.3157	Ortho.DEG
AT1G29970	RPL18AA	A1	192.29	15.3129	13.4732	12.787	Ortho.DEG
AT1G29980	NA	A4	3.63658	136.498	146	128.032	Ortho.DEG
AT1G30000	MNS3	A5	30.7574	25.861	21.6114	22.4234	Ortho.DEG
AT1G30040	GA2OX2	A3	12.256	46.7795	30.9629	27.9074	Ortho.DEG
AT1G30070	NA	A4	9.98775	165.93	160.254	150.762	Ortho.DEG
AT1G30080	NA	A4	8.57726	65.5152	41.4161	40.5748	Ortho.Not.DEG
AT1G30100	NCED5	A6	0.0125278	0.959783	1.81909	2.29081	Ortho.DEG
AT1G30110	NUDT25	A3	19.8689	63.9228	32.5825	29.7182	tair.spec
AT1G30130	NA	A1	134.768	21.992	33.1872	39.7309	tair.spec
AT1G30135	TIFY5A	A1	31.151	0.896648	1.07171	0.680302	tair.spec
AT1G30190	NA	A6	1.09055	0.13276	3.10938	6.85669	tair.spec
AT1G30200	NA	A1	65.173	23.7666	23.4064	25.2382	Ortho.DEG
AT1G30210	TCP24	A6	1.77752	16.5148	49.0365	53.51	Ortho.Not.DEG
AT1G30220	INT2	A1	1.30443	0.117528	0.0889935	0.13463	tair.spec
AT1G30230	NA	A4	422.91	1021.11	1253.1	1249.77	Ortho.DEG
AT1G30240	NA	A4	6.71281	32.9867	34.3802	34.7229	tair.spec
AT1G30260	NA	A1	6.05735	0.137455	0.747459	0.711995	tair.spec
AT1G30280	NA	A1	1.98335	0.462095	0.0702466	0.196215	tair.spec
AT1G30360	ERD4	A1	1285.37	180.518	170.54	183.355	Ortho.DEG
AT1G30370	NA	A1	20.6894	1.20915	0.366606	0.416279	Ortho.Not.DEG
AT1G30380	PSAK	A1	77.7719	1.247	1.78502	2.02319	tair.spec
AT1G30410	ATMRP13	A2	16.4957	1.84532	7.43051	8.64414	Ortho.DEG
AT1G30420	ABCC11	A6	5.43059	9.75961	18.0622	25.0792	Ortho.DEG
AT1G30460	CPSF30	A4	9.861	25.913	30.3226	30.6254	Ortho.DEG
AT1G30480	DRT111	A4	11.0632	28.7122	35.6468	38.5035	Ortho.Not.DEG
AT1G30490	ATHB-9	A6	23.4999	41.6258	69.6987	86.6622	tair.spec
AT1G30500	NFYA7	A1	16.6357	3.23682	3.9955	3.81993	Ortho.DEG
AT1G30510	RFNR2	A4	14.467	263.042	209.279	223.823	Ortho.DEG
AT1G30515	NA	A3	0.28118	3.93857	0.924606	0.11671	tair.spec
AT1G30520	AAE14	A2	3.44382	1.10404	3.14531	2.86119	Ortho.DEG
AT1G30530	UGT78D1	A6	5.92669	3.32916	16.9216	24.9375	Ortho.Not.DEG
AT1G30540	NA	A1	11.5175	7.82352	6.9519	6.59365	Ortho.DEG
AT1G30550	NA	A6	0.173158	0	2.73384	3.34298	Ortho.DEG
AT1G30580	YchF1	A4	110.268	556.676	519.332	516.105	Ortho.DEG
AT1G30600	SBT2.1	A6	7.65551	34.6059	49.697	53.588	Ortho.Not.DEG
AT1G30630	NA	A4	72.3818	192.312	159.499	168.72	Ortho.Not.DEG
AT1G30640	NA	A1	60.4167	13.1064	7.0885	7.05558	Ortho.DEG
AT1G30650	WRKY14	A1	19.8634	6.73587	1.19423	1.49157	Ortho.DEG
AT1G30660	NA	A3	0.84596	3.46058	1.45545	1.62005	Ortho.DEG
AT1G30670	BHLH52	A3	0	1.31284	0.0307386	0.0313688	Ortho.Not.DEG
AT1G30680	NA	A6	16.9139	37.9241	50.5711	54.907	Ortho.DEG
AT1G30690	PATL4	A4	50.6116	182.897	160.604	144.837	Ortho.DEG
AT1G30700	NA	A3	19.2169	132.635	38.8293	23.4478	tair.spec
AT1G30720	NA	A3	29.147	61.5303	5.40153	2.32639	tair.spec
AT1G30730	NA	A3	23.9055	158.91	19.5237	9.11817	tair.spec
AT1G30750	NA	A1	108.189	0.0994219	0.296953	0	tair.spec
AT1G30755	NA	A5	15.7003	12.5478	7.94668	6.89437	Ortho.DEG
AT1G30760	NA	A3	20.4038	1226.83	392.979	307.193	tair.spec
AT1G30810	JMJ18	A1	20.2449	9.60856	10.9731	11.3666	Ortho.DEG
AT1G30820	NA	A6	58.0122	129.098	239.016	247.004	tair.spec
AT1G30825	ARPC2A	A6	7.21353	18.8175	23.9564	26.7417	Ortho.Not.DEG
AT1G30840	PUP4	A1	6.02847	0.565508	0.508089	0.132834	Ortho.DEG
AT1G30845	NA	A4	1.3073	5.29991	6.42656	7.14574	Ortho.DEG
AT1G30860	NA	A3	1.89079	21.9137	7.92504	6.75124	Ortho.DEG
AT1G30870	PER7	A3	0.183155	43.47	2.32854	0.529889	Ortho.DEG
AT1G30900	VSR6	A5	5.66374	7.14008	1.50984	1.69053	Ortho.DEG
AT1G30910	NA	A1	27.6919	18.4301	20.1944	19.0815	Ortho.DEG
AT1G30960	ERG	A4	1.43193	23.0649	25.516	22.022	Ortho.DEG
AT1G31010	OSB4	A4	5.23372	25.4872	32.1116	32.246	tair.spec
AT1G31040	NA	A6	0.573889	1.1828	10.2491	11.4507	Ortho.DEG
AT1G31050	NA	A1	12.8176	0.646468	0	0	Ortho.DEG
AT1G31070	GLCNAC1PUT1	A5	15.8529	15.6057	6.19481	4.83349	Ortho.DEG
AT1G31120	POT10	A1	47.469	12.6074	16.918	16.1352	Ortho.DEG
AT1G31130	NA	A1	268.587	75.9713	112.656	113.41	tair.spec
AT1G31150	NA	A6	3.22165	15.5745	22.3068	23.4506	tair.spec
AT1G31160	HINT 2	A6	9.79042	25.5534	39.7684	37.9759	Ortho.Not.DEG
AT1G31170	ATSRX	A1	15.7471	4.5284	5.1827	4.88048	tair.spec
AT1G31173	MIR167D	A1	7.60575	0	0.743019	0.903657	tair.spec
AT1G31180	ATIMD3	A4	13.0614	93.5788	103.591	101.033	Ortho.DEG
AT1G31200	ATPP2-A9	A1	2.12661	1.06972	0.595871	0.902823	tair.spec
AT1G31230	AKHSDH1	A4	4.76201	39.651	52.7255	57.5364	Ortho.Not.DEG
AT1G31240	NA	A5	3.13829	1.90736	1.21846	1.17648	tair.spec
AT1G31258	NA	A5	85.3225	74.8742	68.0927	59.1568	tair.spec
AT1G31290	AGO3	A1	18.4548	0.845712	0.808253	0.74281	Ortho.DEG
AT1G31310	NA	A6	0.644917	0.404603	4.9712	5.22403	tair.spec
AT1G31320	LBD4	A4	0.742537	55.3981	43.5876	48.1439	Ortho.DEG
AT1G31330	PSAF	A1	219.713	8.91403	11.3029	9.00307	tair.spec
AT1G31335	NA	A3	8.5866	22.1497	16.406	11.4298	tair.spec
AT1G31350	KUF1	A4	13.8198	33.6928	44.5936	42.9633	Ortho.DEG
AT1G31360	RECQL2	A4	6.28927	23.9661	29.8386	29.5737	Ortho.DEG
AT1G31420	FEI1	A1	68.7565	31.5358	35.7576	37.1506	Ortho.Not.DEG
AT1G31430	PCMP-E55	A4	1.05631	3.15097	4.02836	4.04414	tair.spec
AT1G31540	NA	A1	16.9277	2.29857	1.12994	1.40457	tair.spec
AT1G31580	ECS1	A1	23.2142	0.180551	0.0900718	0.195031	tair.spec
AT1G31650	ROPGEF14	A4	3.35244	69.4342	82.3344	79.9002	tair.spec
AT1G31660	NA	A4	18.7289	137.743	123.612	115.103	Ortho.DEG
AT1G31710	NA	A1	92.7726	35.9165	33.2639	33.4826	tair.spec
AT1G31720	NA	A5	1.32143	0.779224	0.265774	0.188844	Ortho.DEG
AT1G31750	NA	A1	5.78256	0.17472	0.144324	0.216312	tair.spec
AT1G31760	NA	A4	1.33187	15.9144	22.3321	18.38	Ortho.DEG
AT1G31770	ABCG14	A3	19.5402	29.1278	17.3186	16.3586	Ortho.Not.DEG
AT1G31780	NA	A4	20.8154	56.4992	56.9243	63.5242	Ortho.Not.DEG
AT1G31810	FH14	A4	13.4244	54.2521	41.9676	41.8001	Ortho.DEG
AT1G31812	ACBP6	A1	328.133	131.484	115.047	100.856	Ortho.DEG
AT1G31817	NFD3	A4	15.6802	84.1632	78.0333	71.9157	tair.spec
AT1G31820	NA	A1	19.87	0.344435	0.396234	0.632209	Ortho.DEG
AT1G31835	NA	A4	1.92307	5.05631	3.65212	3.68063	tair.spec
AT1G31840	NA	A4	0.961353	2.58515	3.07431	2.57862	tair.spec
AT1G31850	NA	A4	11.0504	38.9272	42.576	46.8046	Ortho.DEG
AT1G31860	HISN2	A4	6.89184	52.8711	61.7752	58.3239	Ortho.DEG
AT1G31885	NIP3-1	A3	0.740506	2.63248	1.17247	0.577647	Ortho.DEG
AT1G31935	NA	A1	6.4711	2.01846	4.2054	3.14448	tair.spec
AT1G31950	NA	A6	0.741637	0.700161	2.93445	2.44408	Ortho.DEG
AT1G31970	RH5	A4	66.3501	216.611	233.668	226.214	Ortho.DEG
AT1G32050	SCAMP4	A1	211.678	134.695	137.203	139.959	Ortho.DEG
AT1G32060	PRK	A1	42.6163	0.230196	0.0812127	0.136785	tair.spec
AT1G32080	PLGG1	A1	5.76247	0.0619884	0	0	Ortho.Not.DEG
AT1G32090	NA	A1	94.6445	49.1252	28.3775	30.5671	Ortho.DEG
AT1G32100	PRR1	A5	59.4037	58.2459	7.96918	5.9185	Ortho.Not.DEG
AT1G32120	NA	A4	0.650914	5.43474	3.85374	4.04991	Ortho.Not.DEG
AT1G32127	NA	A2	15.5106	8.61877	15.3009	16.6671	tair.spec
AT1G32160	NA	A2	30.9179	17.1764	28.2091	28.6389	Ortho.Not.DEG
AT1G32170	XTH30	A1	523.015	20.8216	7.31912	5.16322	Ortho.DEG
AT1G32190	NA	A6	2.99726	36.8965	80.3238	93.2795	Ortho.DEG
AT1G32210	DAD1	A4	11.0425	29.046	34.869	32.8022	Ortho.DEG
AT1G32230	RCD1	A1	221.895	99.519	78.3167	101.427	Ortho.DEG
AT1G32240	KAN2	A6	1.52091	4.65879	8.43114	8.6586	tair.spec
AT1G32260	NA	A4	9.84083	30.084	37.5173	42.2761	tair.spec
AT1G32340	NHL8	A1	25.2841	14.4662	14.04	15.3014	Ortho.DEG
AT1G32350	AOX3	A6	0.0864404	0.0818213	1.29453	1.88854	tair.spec
AT1G32360	NA	A2	43.9421	18.9281	40.612	42.1828	tair.spec
AT1G32380	PRS2	A6	3.28742	26.9072	46.2683	44.8767	Ortho.Not.DEG
AT1G32385	NA	A4	0.303026	7.68535	8.45996	4.03161	tair.spec
AT1G32400	TOM2A	A1	136.59	60.5837	56.9472	61.7997	Ortho.DEG
AT1G32410	NA	A1	107.663	31.1577	24.5338	21.5382	Ortho.DEG
AT1G32440	PKP3	A4	11.8513	61.5154	60.1879	57.0986	Ortho.DEG
AT1G32450	NPF7.3	A1	16.7117	1.19532	0.179395	0.412612	Ortho.Not.DEG
AT1G32470	GDH3	A1	12.0359	2.70463	2.88398	4.04146	Ortho.DEG
AT1G32510	ANAC011	A1	3.42239	0.0545367	0.0683586	0	Ortho.DEG
AT1G32520	NA	A1	11.6813	1.29998	1.40974	1.83756	Ortho.Not.DEG
AT1G32540	LOL1	A1	4.46902	0.0502561	1.30338	1.44506	Ortho.Not.DEG
AT1G32550	FdC1	A2	4.06145	2.49005	4.58937	3.94767	Ortho.DEG
AT1G32560	LEA6	A1	9.11656	0.880302	0.212369	0.100655	tair.spec
AT1G32570	NA	A4	0.563901	2.79908	1.71366	2.97194	tair.spec
AT1G32580	MORF5	A4	43.8996	138.86	124.292	116.264	Ortho.DEG
AT1G32583	TDL1	A6	2.61216	1.46341	3.62645	4.57555	tair.spec
AT1G32610	NA	A6	1.11903	4.66166	7.25099	8.71134	tair.spec
AT1G32690	NA	A1	18.0035	11.1867	10.0084	8.94719	tair.spec
AT1G32700	NA	A1	119.731	10.8106	42.3224	48.3917	Ortho.DEG
AT1G32730	NA	A4	4.81596	18.0046	22.6786	22.3226	tair.spec
AT1G32740	NA	A6	1.29059	3.12038	6.88319	7.34034	Ortho.Not.DEG
AT1G32760	NA	A6	4.68449	12.9465	18.6633	20.671	Ortho.DEG
AT1G32860	NA	A6	5.0306	15.5202	20.8056	25.05	Ortho.DEG
AT1G32870	ANAC13	A4	10.5474	28.5164	26.0973	25.7831	tair.spec
AT1G32900	GBSS1	A6	0.178081	0.419411	7.23844	13.308	Ortho.DEG
AT1G32920	NA	A1	263.168	54.0765	42.4768	34.2898	tair.spec
AT1G32928	NA	A1	38.9457	2.19693	7.61407	5.42369	tair.spec
AT1G32930	GALT31A	A6	4.28298	19.6396	29.1309	33.6323	tair.spec
AT1G32950	SBT3.4	A1	1.00752	0.396718	0.368247	0.197334	Ortho.DEG
AT1G32960	SBT3.3	A3	0.858646	6.77135	3.2756	3.15949	Ortho.DEG
AT1G33030	NA	A4	0.583876	7.55554	7.16363	5.83476	tair.spec
AT1G33040	NACA5	A4	12.6335	125.484	144.076	138.541	tair.spec
AT1G33050	NA	A1	218.296	31.8311	50.1705	53.5261	tair.spec
AT1G33055	NA	A1	52.9492	0.389797	2.03444	1.72969	tair.spec
AT1G33060	NAC014	A6	15.8946	34.1411	51.2193	53.8201	Ortho.DEG
AT1G33080	DTX23	A6	1.28714	1.36933	11.2043	15.4228	Ortho.DEG
AT1G33102	NA	A6	0.427736	0.569232	2.3207	3.16767	tair.spec
AT1G33110	DTX21	A6	17.9233	48.5154	84.2158	96.7149	Ortho.DEG
AT1G33120	RPL9B	A4	34.0034	179.179	194.155	178.445	Ortho.DEG
AT1G33140	RPL9B	A4	40.9829	157.525	169.527	164.424	Ortho.DEG
AT1G33170	NA	A3	2.66038	37.6358	14.5411	11.9582	Ortho.DEG
AT1G33240	AT-GTL1	A1	18.2808	2.14998	0.614687	0.554573	Ortho.DEG
AT1G33250	NA	A1	51.3167	21.6156	30.5331	33.8501	Ortho.DEG
AT1G33265	FAX4	A4	3.6165	27.7894	34.0119	35.6894	tair.spec
AT1G33280	BRN1	A3	0.0654844	214.812	23.5805	19.569	Ortho.DEG
AT1G33290	NA	A2	25.1349	13.0126	22.2878	22.2929	Ortho.Not.DEG
AT1G33340	NA	A1	2.79141	0.742735	0.60809	0.943592	Ortho.Not.DEG
AT1G33350	PCMP-E57	A6	1.47346	3.98494	6.53406	6.72916	Ortho.Not.DEG
AT1G33390	FAS4	A4	7.43636	18.7524	21.8904	21.796	Ortho.DEG
AT1G33410	SAR1	A4	18.6382	55.9855	61.1569	65.7085	tair.spec
AT1G33415	NA	A1	2.63089	1.24033	1.35579	1.51128	tair.spec
AT1G33440	NPF4.4	A3	4.94478	7.51191	3.08342	2.81555	Ortho.DEG
AT1G33475	PHYL1.2	A2	1.60659	0.682458	1.27708	1.31535	Ortho.DEG
AT1G33480	ATL58	A6	2.42917	13.4291	19.8617	20.8874	Ortho.Not.DEG
AT1G33500	NA	A4	0.288687	2.83157	3.13125	3.131	Ortho.Not.DEG
AT1G33520	MOS2	A1	118.632	48.5587	61.1252	67.677	Ortho.Not.DEG
AT1G33540	SCPL18	A6	0.12608	0.145605	2.2168	3.31811	tair.spec
AT1G33560	ADR1	A1	24.9201	8.05455	10.5437	13.0742	Ortho.DEG
AT1G33600	NA	A1	55.9873	1.07674	1.3378	1.86808	tair.spec
AT1G33610	NA	A1	31.747	2.93138	3.45612	3.54939	tair.spec
AT1G33612	NA	A3	0.607879	7.48481	3.78985	3.44484	tair.spec
AT1G33615	NA	A4	0.917795	2.35906	2.90648	3.2171	tair.spec
AT1G33700	NA	A5	35.9201	21.9599	10.1326	6.17289	Ortho.DEG
AT1G33750	TPS22	A6	0.0852032	1.85452	22.2713	23.2108	Ortho.DEG
AT1G33760	ERF022	A1	15.1722	0.619694	0.587371	0.0741971	Ortho.Not.DEG
AT1G33770	NA	A5	6.34449	11.1157	1.57786	0.682918	Ortho.DEG
AT1G33790	JAL4	A6	25.1102	68.6542	156.625	175.411	tair.spec
AT1G33800	GXM3	A1	17.6083	13.9923	11.7447	13.1548	Ortho.DEG
AT1G33811	NA	A1	4.28179	0.800512	0.366848	0.15762	Ortho.Not.DEG
AT1G33960	AIG1	A6	0.0490309	0.0172091	10.4369	14.5518	tair.spec
AT1G33970	IAN9	A1	81.9297	27.3789	17.2013	14.9665	Ortho.DEG
AT1G34000	OHP2	A1	128.922	9.23948	24.2789	31.7393	tair.spec
AT1G34010	NA	A4	8.9767	24.5263	34.5321	31.0643	tair.spec
AT1G34030	RPS18C	A4	93.2934	490.966	511.87	452.588	Ortho.DEG
AT1G34040	TAR3	A3	1.32142	1.9741	0.779034	0.623828	Ortho.DEG
AT1G34060	TAR4	A4	0.222539	1.99093	2.62528	2.81409	Ortho.DEG
AT1G34065	SAMC2	A4	0.856701	17.6507	23.8765	24.4855	Ortho.Not.DEG
AT1G34110	NA	A4	20.0544	206.95	233.449	258.429	Ortho.DEG
AT1G34130	STT3B	A4	12.1358	49.5954	56.1911	57.9818	Ortho.Not.DEG
AT1G34160	PCMP-H68	A4	2.25401	10.2589	9.59666	9.92544	Ortho.DEG
AT1G34180	anac016	A2	15.4482	3.7594	9.58127	9.92023	tair.spec
AT1G34210	SERK2	A6	15.1224	44.0041	85.7251	85.9945	Ortho.DEG
AT1G34220	NA	A1	64.3846	26.8913	25.7958	26.8894	Ortho.DEG
AT1G34260	FAB1D	A1	12.8167	4.83487	3.57942	4.1958	tair.spec
AT1G34300	NA	A1	64.3239	21.0586	22.2667	23.9463	Ortho.DEG
AT1G34315	NA	A6	6.84914	13.9774	29.9523	31.7874	tair.spec
AT1G34317	NA	A6	4.5827	5.56692	13.0904	15.9205	tair.spec
AT1G34340	NA	A4	5.63949	15.1215	12.8447	13.4116	Ortho.DEG
AT1G34355	PS1	A4	1.68588	25.0474	30.3604	30.7855	Ortho.DEG
AT1G34380	NA	A4	1.46506	5.12706	5.44263	5.58076	Ortho.DEG
AT1G34420	NA	A1	9.23024	1.44447	2.75606	3.29905	tair.spec
AT1G34430	EMB3003	A4	22.5898	68.0422	95.31	90.0411	tair.spec
AT1G34460	CYCB1;5	A2	4.61795	2.9023	5.13894	6.06339	Ortho.DEG
AT1G34520	NA	A3	0.201332	3.83433	0.304857	0.134168	Ortho.DEG
AT1G34570	NA	A4	2.42846	12.8526	12.8169	12.8971	tair.spec
AT1G34640	NA	A6	4.0734	8.95195	20.7277	16.5267	Ortho.DEG
AT1G34670	AtMYB93	A4	1.20195	5.90912	5.02993	3.47861	Ortho.Not.DEG
AT1G34750	NA	A3	63.9531	130.595	48.8423	43.4471	Ortho.Not.DEG
AT1G34760	GRF11	A1	65.4485	2.11175	0.541031	0.686907	Ortho.Not.DEG
AT1G34770	NA	A6	2.41444	19.2792	33.4316	31.5804	Ortho.Not.DEG
AT1G34844	NA	A2	6.22362	3.19205	3.93584	5.88104	tair.spec
AT1G35140	EXL1	A1	516.15	53.0686	63.7506	40.209	Ortho.DEG
AT1G35170	NA	A3	0.13194	1.32429	0.148874	0.164757	Ortho.DEG
AT1G35190	NA	A1	75.382	39.9934	32.9165	32.3868	Ortho.DEG
AT1G35210	NA	A1	35.6484	2.16796	1.65661	1.38901	tair.spec
AT1G35220	NA	A4	8.31924	19.4187	23.8286	25.8214	Ortho.Not.DEG
AT1G35230	AGP5	A6	2.42061	1.32121	3.76548	9.29104	tair.spec
AT1G35250	ALT2	A3	0.420452	1.58367	0.357604	0.212625	Ortho.DEG
AT1G35260	MLP165	A1	42.9727	7.37969	6.13686	2.7906	Ortho.Not.DEG
AT1G35290	ALT1	A1	2.10192	0	0	0	Ortho.DEG
AT1G35320	NA	A4	2.99596	53.799	45.1946	44.6031	tair.spec
AT1G35350	PHO1-H8	A1	37.5869	0.931533	0.109614	0.055327	tair.spec
AT1G35420	NA	A1	4.48316	0.589994	0.399801	0.641606	Ortho.Not.DEG
AT1G35430	NA	A1	12.9131	3.80529	2.92994	2.74192	tair.spec
AT1G35460	BHLH80	A5	7.47569	8.00177	7.19219	4.99834	tair.spec
AT1G35515	MYB8	A4	0.766571	2.89894	2.30386	1.73263	Ortho.DEG
AT1G35516	NA	A2	87.1006	31.8558	68.5339	69.5316	tair.spec
AT1G35530	NA	A4	1.07164	9.37478	10.7633	10.9765	tair.spec
AT1G35560	TCP23	A3	4.555	8.98638	6.52311	4.58674	Ortho.Not.DEG
AT1G35580	CINV1	A1	597.089	126.577	112.422	113.782	Ortho.DEG
AT1G35610	NA	A6	0.0149788	1.20997	5.02011	4.96405	tair.spec
AT1G35625	RMR6	A1	1.94318	0.253075	0.145197	0.131707	Ortho.DEG
AT1G35670	CPK11	A5	40.0362	28.2146	21.3282	19.3252	Ortho.DEG
AT1G35710	NA	A6	1.0056	4.40629	8.59128	10.8021	Ortho.DEG
AT1G35720	ANN1	A5	161.19	80.8207	23.8537	32.3316	Ortho.DEG
AT1G35780	NA	A4	11.6953	53.4343	45.8258	45.0499	Ortho.DEG
AT1G35830	NA	A6	0.583292	4.29893	17.5969	21.2713	tair.spec
AT1G35880	NA	A3	0	1.61734	0.465794	0.478749	tair.spec
AT1G35910	TPPD	A6	0.797993	4.21251	7.13225	10.1874	Ortho.DEG
AT1G36060	ERF055	A4	63.2487	439.64	296.299	279.476	Ortho.DEG
AT1G36070	NA	A2	26.0128	15.3666	22.2985	24.5858	Ortho.DEG
AT1G36180	ACC2	A3	1.31758	23.028	9.86197	11.7124	Ortho.DEG
AT1G36280	NA	A4	3.65682	40.2372	43.5267	45.3756	Ortho.DEG
AT1G36310	TRM9	A4	15.8928	59.8656	62.578	65.4718	Ortho.Not.DEG
AT1G36340	UBC31	A1	7.28794	0.136952	0	0	Ortho.Not.DEG
AT1G36380	NA	A1	85.9264	17.5163	20.4929	21.9426	Ortho.DEG
AT1G36622	NA	A1	4.58265	1.80925	0.293454	0.328154	tair.spec
AT1G36640	NA	A3	0.333495	5.7363	0.988742	0.2092	tair.spec
AT1G36675	NA	A1	1.5984	0	0	0	tair.spec
AT1G36940	NA	A4	2.9668	39.5517	47.6776	46.2536	tair.spec
AT1G36980	NA	A1	176.648	40.6352	38.4861	33.9063	Ortho.DEG
AT1G37130	NIA2	A3	62.1607	329.328	199.787	181.002	Ortho.DEG
AT1G37150	HCS2	A6	0.415149	2.75788	4.83728	5.41271	Ortho.DEG
AT1G38065	NA	A4	0.0599083	1.29815	0.799645	0.738456	tair.spec
AT1G38131	OFUT11	A4	0.989538	8.77767	6.55893	6.31403	tair.spec
AT1G41830	SKS6	A6	22.0596	45.5507	53.06	69.5587	tair.spec
AT1G41880	RPL35AB	A4	32.1985	412.566	461.036	413.185	Ortho.DEG
AT1G42430	NA	A6	9.29273	29.9864	42.7899	43.7106	Ortho.DEG
AT1G42470	NA	A1	66.5372	20.7374	18.3349	19.4088	Ortho.DEG
AT1G42480	NA	A4	8.05363	37.6055	40.1134	41.0518	Ortho.Not.DEG
AT1G42550	PMI1	A1	35.5246	0.031047	0.0254169	0.0471065	tair.spec
AT1G42970	GAPB	A1	41.2899	0.904161	0.282518	0.619564	Ortho.DEG
AT1G42980	FH12	A1	4.84566	0.374552	0.235352	0.0268752	Ortho.DEG
AT1G42990	BZIP60	A1	115.438	50.6209	34.0468	34.8721	Ortho.DEG
AT1G43020	NA	A1	4.42631	0	0	0	Ortho.DEG
AT1G43130	LCV2	A2	38.1184	21.3875	30.704	36.6132	Ortho.Not.DEG
AT1G43140	NA	A1	1.84894	0	0	0	Ortho.Not.DEG
AT1G43160	RAP2-6	A1	176.347	0.122186	0.310173	0.247484	Ortho.DEG
AT1G43170	ARP1	A4	290.931	1981.83	2080.51	1898.68	Ortho.DEG
AT1G43245	NA	A2	9.69053	5.01356	7.83182	7.92246	tair.spec
AT1G43650	NA	A1	2.08541	0.314021	0.490753	0.531142	tair.spec
AT1G43670	CYFBP	A1	73.619	15.7092	30.5885	28.4744	Ortho.DEG
[truncated: 12,441 more rows]

## Sheet: Table S22
Table S22. Motif activity dynamics in wheat and Arabidopsis.
Motif.tairID	MotiftairName	Family	DAI0	DAI3	DAI6	DAI9	CIM0d	CIM3d	CIM5d	CIM7d	wheat.Variability	tair.Variability
AT5G17430	BBM	AP2	-21.457	-4.72167	23.5806	14.4654	0.144553	0.981359	-2.07993	0.388948	20.1062	1.33934
AT3G20840	PLT1	AP2	-5.83315	-4.28969	9.70929	3.2761	-8.62976	-5.385	-2.56314	8.45117	7.19679	7.41512
AT5G10510	AIL6	AP2	-5.33579	-4.13527	9.04837	3.70249	-10.0811	-3.97067	-0.722306	8.13514	6.7937	7.59557
AT5G65510	AIL7	AP2	-5.08377	-2.94948	7.85197	3.36085	-5.27629	0.885	1.66144	2.4663	5.91511	3.53309
AT3G54990	SMZ	AP2	0.29979	-7.19139	3.69832	1.67627	-1.87229	-0.599491	-1.35775	2.06956	4.75107	1.75281
AT4G37750	ANT	AP2	-2.39984	-4.02739	5.67794	1.79386	-6.18496	-2.36476	-1.28331	5.47074	4.36514	4.85332
AT2G28550	RAP2.7	AP2	3.34976	-5.82639	1.41867	-0.869794	-1.58489	-1.34315	-1.33067	2.06278	3.95844	1.7451
AT5G60120	TOE2	AP2	3.2131	0.927402	-0.887954	-5.15767	-1.84313	0.124178	0.41602	1.23914	3.54339	1.3064
AT1G59750	ARF1	ARF	9.99161	-2.96384	-6.79248	-6.49457	-0.722145	-0.633673	0.704087	0.498415	7.89809	0.744158
AT5G37020	ARF8	ARF	9.75538	-5.17121	-5.41636	-6.11533	-0.500386	-0.781217	0.0952268	0.497014	7.67194	0.576764
AT1G19850	ARF5	ARF	9.33114	-2.41999	-4.84251	-4.52318	-1.36794	-0.873801	-0.729898	1.50454	6.71638	1.27712
AT5G62000	ARF2	ARF	5.05111	-7.84309	0.397648	-1.59545	-1.27253	-0.540882	0.714608	0.849866	5.34639	1.02133
AT4G30080	ARF16	ARF	-2.88911	-1.35069	4.78821	1.23031	-1.00875	0.418006	-0.281758	0.668078	3.35763	0.754449
AT2G33860	ARF3	ARF	1.29593	-2.57214	0.668856	0.116077	-2.13164	0.342239	1.69402	0.843298	1.70253	1.64337
AT4G31920	ARR10	ARR-B	-5.30075	-8.19074	10.196	6.66145	-0.965322	3.35347	2.62162	-1.56409	8.95707	2.4852
AT2G01760	ARR14	ARR-B	-5.30075	-8.19074	10.196	6.66145	-0.187227	1.28017	-0.0631485	-0.143729	8.95707	0.707638
AT4G16110	ARR2	ARR-B	-1.39563	-10.6934	7.36541	4.55131	-1.30186	2.74707	1.17319	-0.335358	7.98442	1.77266
AT5G58080	ARR18	ARR-B	4.81396	-8.54471	1.42883	-0.083575	1.67105	1.36438	0.289814	-1.55272	5.68074	1.45641
AT1G67710	ARR11	ARR-B	5.63875	-5.76741	0.188819	-2.07776	1.01173	0.923377	-0.594799	-0.793387	4.77471	0.963447
AT3G26790	FUS3	B3	64.8492	-11.2177	-49.9065	-30.9318	-5.43235	-7.13866	-6.96559	8.44419	50.3112	7.51741
AT1G28300	LEC2	B3	60.5034	-11.7683	-35.8097	-29.8172	-3.38474	-6.76356	-8.77215	6.99762	44.3442	7.01382
AT3G24650	ABI3	B3	43.0929	-3.80221	-30.5378	-24.0443	-1.3187	-5.86025	-7.11481	4.7301	33.285	5.36066
AT1G49480	REM19	B3	-13.3067	0.12874	11.6624	8.0851	0.0819679	1.51623	0.887702	-0.728443	11.0706	0.975047
AT5G60130	AT5G60130	B3	-4.76376	-3.52793	8.22603	3.5365	-1.71136	0.00235215	-2.69034	2.26326	6.11834	2.17166
AT5G18090	AT5G18090	B3	2.9774	-5.89622	3.27123	-1.7306	0.696084	3.43365	2.16966	-2.22407	4.35322	2.43422
AT4G01500	NGA4	B3	4.16881	-3.69103	0.163582	-2.13613	-0.902352	2.20262	2.03013	-0.872192	3.4173	1.73563
AT4G33280	AT4G33280	B3	-1.44556	-2.13224	3.45436	1.12744	-0.420464	0.959709	-0.172718	0.143551	2.55524	0.600895
AT2G01930	BPC1	BBR-BPC	-24.1567	-4.61307	24.0751	18.0629	-1.33563	0.794901	-2.58286	1.83946	22.106	2.00485
AT4G38910	BPC5	BBR-BPC	-20.4039	-4.88152	18.3368	16.4618	-1.97644	0.327186	-2.39189	2.25228	18.482	2.16081
AT5G42520	BPC6	BBR-BPC	-21.315	-4.95878	20.3827	16.9481	-1.78405	0.318241	-2.85178	2.37005	19.5878	2.31557
AT4G36780	BEH2	BES1	18.442	0.230173	-13.8191	-15.4642	2.64013	-7.11963	-7.5886	2.74775	15.7281	5.80457
AT1G78700	BEH4	BES1	18.2959	0.109852	-13.6081	-15.2575	3.56739	-6.99965	-7.80967	2.00877	15.5497	5.92831
AT5G45300	BMY2	BES1	17.6179	-0.920473	-12.5085	-15.8702	6.45729	-6.404	-7.8313	0.294387	15.1157	6.58591
AT1G75080	BZR1	BES1	19.0713	-6.67772	-9.58647	-11.5138	3.83993	-5.57208	-8.37729	1.85726	14.3041	5.84229
AT4G18890	BEH3	BES1	14.7507	1.38035	-11.793	-11.7891	5.17578	-7.94528	-9.18251	1.17565	12.6973	6.9901
AT1G19350	BES1	BES1	10.4616	-0.723398	-6.79688	-8.63144	5.51625	-5.8077	-8.51481	0.435494	8.61343	6.30694
AT5G48560	BHLH78	bHLH	24.7106	-10.342	-14.4366	-10.269	-1.19168	-2.31438	-2.62265	2.60201	18.3005	2.40248
AT5G08130	BIM1	bHLH	17.6298	-1.29438	-16.4951	-10.2765	4.77452	-7.56009	-8.86364	2.05331	14.8655	6.82424
AT2G31220	BHLH10	bHLH	-16.1254	-1.22819	18.6344	8.76356	-0.464735	1.1521	1.23914	-0.527687	14.8364	0.977763
AT1G69010	BIM2	bHLH	18.3018	-2.27209	-14.6504	-9.82726	4.65308	-6.72555	-7.38982	1.53933	14.5314	6.00471
AT3G23690	BHLH77	bHLH	17.8161	-6.27367	-12.7038	-8.74744	-7.18535e-05	-8.48676	-9.35051	5.17859	13.7856	6.98126
AT2G22750	AT2G22750	bHLH	17.5529	-6.2089	-11.0835	-10.1361	5.48634	-5.33836	-7.52694	-0.798026	13.5137	5.74961
AT4G21330	DYT1	bHLH	17.1287	-4.61285	-13.2243	-8.54091	1.73195	-3.20174	-3.57133	0.803811	13.4302	2.718
AT1G51140	BHLH122	bHLH	8.36424	-19.0122	-5.28003	8.55771	-0.963307	-3.46861	-3.60323	2.90581	13.1524	3.0446
AT4G00050	UNE10	bHLH	16.1143	-2.05771	-11.4224	-10.8406	3.54035	-7.50821	-8.12299	2.65492	12.846	6.31611
AT1G35460	BHLH80	bHLH	7.28186	-17.9697	-4.40436	9.67976	-0.781265	-2.90963	-3.67051	2.53552	12.6716	2.77822
AT2G42280	AT2G42280	bHLH	7.67766	-17.6533	-5.0633	9.40547	-0.304901	-4.00078	-4.35375	2.76198	12.6062	3.3659
AT5G46830	BHLH28	bHLH	15.468	-11.5935	-8.22538	-1.28613	1.66585	-1.47901	-3.90553	0.689244	12.0421	2.47631
AT1G10120	BHLH74	bHLH	15.1513	-4.7057	-10.4585	-9.64963	4.14656	-6.7372	-8.07268	1.90719	11.9842	6.11615
AT1G01260	BHLH13	bHLH	14.6397	-3.10792	-10.5612	-9.65686	5.07169	-6.32146	-7.42259	0.89824	11.6892	5.9575
AT4G16430	BHLH3	bHLH	14.6397	-3.10792	-10.5612	-9.65686	5.35943	-6.46949	-7.35327	0.644558	11.6892	6.04926
AT1G32640	MYC2	bHLH	14.6397	-3.10792	-10.5612	-9.65686	-5.5256	-6.6627	-7.482	9.9187	11.6892	8.2767
AT5G46760	MYC3	bHLH	14.6397	-3.10792	-10.5612	-9.65686	3.34359	-6.00608	-7.35402	1.60888	11.6892	5.36192
AT4G17880	MYC4	bHLH	14.6397	-3.10792	-10.5612	-9.65686	5.6112	-6.72493	-7.69853	0.295385	11.6892	6.26978
AT2G18300	AT2G18300	bHLH	15.5474	-6.03738	-9.21759	-6.28333	-0.513991	-6.85394	-8.50758	5.62745	11.4549	6.4558
AT2G46510	AIB	bHLH	14.7242	-5.15384	-10.9184	-6.50283	-4.91148	-5.61944	-6.11829	9.07694	11.3938	7.33008
AT5G38860	BIM3	bHLH	14.3657	-4.38603	-10.3699	-7.98873	4.32369	-5.88078	-7.56317	1.50299	11.246	5.72226
AT4G14410	BHLH104	bHLH	12.5323	-0.0345625	-9.21665	-10.5933	3.84924	-6.18037	-7.74035	1.77364	10.6592	5.74047
AT1G09530	PIF3	bHLH	11.8151	0.940336	-11.1272	-8.38929	1.57971	-7.63391	-8.62513	3.76503	10.3802	6.31295
AT4G30980	LRL2	bHLH	13.5683	-5.07997	-8.17012	-7.15666	4.37283	-4.888	-7.25545	0.797499	10.2662	5.29577
AT2G20180	PIF1	bHLH	12.6525	-2.42018	-6.51345	-9.60472	6.19538	-8.53259	-9.65822	1.31658	9.86504	7.69617
AT1G59640	BPE	bHLH	11.2047	-1.38446	-9.42479	-9.14197	4.70158	-8.66178	-9.42942	2.16419	9.67365	7.28529
AT3G59060	PIF5	bHLH	11.1132	0.630432	-7.70111	-9.17168	-2.96326	-7.68274	-6.55976	6.14755	9.3229	6.27315
AT3G23210	BHLH34	bHLH	11.5077	-8.65998	-2.95277	-5.90574	5.44507	-5.0473	-8.3256	0.37817	8.9812	6.06447
AT2G24260	BHLH66	bHLH	11.0363	-2.11278	-8.00614	-5.97328	4.06058	-6.23103	-7.83896	1.75074	8.5567	5.85312
AT2G43010	PIF4	bHLH	9.38672	0.333757	-7.91549	-6.50418	1.35745	-8.38662	-8.53779	4.23408	7.90908	6.60532
AT4G36930	SPT	bHLH	9.87705	-3.17454	-7.1343	-6.34138	3.24979	-6.82591	-7.36813	1.96425	7.90097	5.63151
AT5G61270	BHLH72	bHLH	8.96072	-0.45137	-6.96111	-7.45425	3.81528	-5.2142	-7.16084	0.929489	7.65508	5.14233
AT4G34000	ABF3	bZIP	21.5435	10.2874	-17.4843	-24.9637	7.17323	-4.37788	-6.02877	-2.32401	22.1409	5.90612
AT3G56850	DPBF3	bZIP	12.4781	6.78976	-9.97406	-15.227	9.94072	-5.2186	-8.0397	-3.42623	13.2205	7.98035
AT5G06950	TGA2	bZIP	15.9586	-5.14279	-6.15959	-14.5922	-0.95996	-1.25145	-3.69549	2.46758	13.004	2.53482
AT1G75390	BZIP44	bZIP	15.9571	-0.838615	-8.37429	-11.4964	7.95263	-2.53576	-6.19801	-2.94428	12.2744	6.14516
AT1G08320	TGA9	bZIP	15.3824	-2.7021	-9.07633	-11.9299	1.38189	-1.46897	-3.53274	0.719375	12.265	2.23324
AT3G30530	ATBZIP42	bZIP	14.3443	0.0101896	-8.53297	-13.6342	7.67861	-1.47271	-4.29493	-4.04633	12.2366	5.62166
AT3G10800	BZIP28	bZIP	13.6576	2.67512	-9.03465	-13.3948	10.3522	-5.10299	-7.84515	-3.12005	12.1852	8.08955
AT2G35530	BZIP16	bZIP	12.026	4.83549	-9.68695	-13.5336	9.28696	-4.57229	-7.20856	-3.22312	12.0401	7.33335
AT5G15830	AtbZIP3	bZIP	14.7013	0.91281	-8.60123	-12.2757	8.65553	-4.93135	-8.20861	-2.46506	12.0376	7.31711
AT5G10030	TGA4	bZIP	15.4072	-2.59039	-8.59829	-11.1799	4.04291	0.167125	-2.31136	-1.83033	11.9847	2.89047
AT4G34590	BZIP11	bZIP	15.008	-0.928433	-8.59603	-11.6682	7.34972	-2.35753	-6.30567	-2.65315	11.9245	5.84361
AT1G77920	TGA7	bZIP	15.3662	-5.48446	-6.93625	-11.0566	0.198341	-1.37058	-3.43842	1.48531	11.8338	2.1217
AT5G38800	BZIP43	bZIP	15.4018	-3.59374	-8.06926	-10.7428	6.57061	-3.69049	-6.97546	-1.50572	11.8094	5.76986
AT1G22070	TGA3	bZIP	14.9096	-4.36288	-6.9149	-12.0149	0.409616	-1.32491	-4.89058	1.63532	11.7748	2.83824
AT2G04038	AtbZIP48	bZIP	14.4792	-0.494051	-8.31792	-11.9336	8.24359	-2.43585	-5.42896	-3.15524	11.7143	6.0935
AT5G06960	TGA5	bZIP	15.0633	-3.77739	-7.31914	-11.1657	-0.56327	-0.581319	-3.77991	1.91217	11.6398	2.33315
AT1G45249	ABF2	bZIP	12.0046	3.79656	-9.13707	-13.1663	9.82303	-4.85504	-7.71127	-3.22292	11.616	7.76778
AT5G06839	TGA10	bZIP	14.8378	-5.39083	-7.75819	-10.7241	3.1463	-0.986684	-3.39921	-0.517636	11.6047	2.70329
AT3G12250	TGA6	bZIP	15.0355	-5.06671	-5.83763	-10.8999	0.476291	-0.809985	-4.41864	1.36621	11.448	2.54345
AT2G36270	ABI5	bZIP	11.2701	5.26338	-7.70554	-13.4789	10.5477	-5.04876	-7.72703	-3.72884	11.4071	8.19522
AT1G32150	BZIP68	bZIP	12.4643	2.44893	-8.41977	-12.8475	9.19787	-4.83499	-7.5428	-3.08454	11.361	7.40665
AT2G46270	GBF3	bZIP	12.6649	3.21921	-8.16534	-12.0946	8.89423	-4.62167	-7.02297	-3.0055	11.2387	7.08378
AT2G18160	BZIP2	bZIP	13.4937	1.13166	-7.5207	-11.7196	9.48266	-4.21703	-7.01095	-3.20824	11.1347	7.32611
AT1G42990	BZIP60	bZIP	14.0537	-3.15314	-6.61293	-11.0698	1.29869	-1.02978	-3.60641	0.57234	10.9882	2.17327
AT5G65210	TGA1	bZIP	14.1004	-4.4817	-5.97552	-10.9345	1.04503	-1.39064	-4.31664	1.05754	10.9679	2.55142
AT3G62420	BZIP53	bZIP	13.5832	-1.43899	-7.44666	-10.8659	7.22049	-2.59994	-6.22964	-2.68641	10.8102	5.78237
AT5G11260	HY5	bZIP	12.285	-1.80371	-5.63856	-11.7798	5.38014	-1.81514	-4.28874	-1.79667	10.2095	4.17428
AT5G28770	BZIP63	bZIP	13.1822	-3.20991	-7.0854	-9.27558	6.58177	-4.44457	-6.43948	-0.843292	10.1671	5.7339
AT1G43700	VIP1	bZIP	12.9578	-8.02646	-5.32664	-5.73301	2.5131	-2.14974	-2.9054	-0.329331	9.73276	2.4101
AT4G36730	GBF1	bZIP	11.7037	-4.5132	-4.22878	-7.63932	9.04062	-5.62571	-8.40228	-2.17314	8.72006	7.65689
AT1G06070	AT1G06070	bZIP	11.0763	-4.86078	-5.02434	-4.37124	2.24508	-2.38022	-2.82044	-0.189854	7.91907	2.32546
AT2G40620	BZIP18	bZIP	9.7165	-8.20505	-4.16197	-3.24139	2.37995	-1.74679	-2.183	-0.782117	7.76495	2.06019
AT2G21230	AT2G21230	bZIP	9.14542	-6.98172	-2.67021	-2.0088	2.99314	-1.36206	-2.35861	-1.1094	6.87912	2.36392
AT1G06850	AtbZIP52	bZIP	7.15664	-9.05736	-2.20567	0.386389	1.96651	-1.34611	-1.48059	-0.640039	6.70343	1.60398
AT1G49720	ABF1	bZIP	6.13161	-5.23217	1.25851	-5.08284	6.92014	-5.75757	-7.44805	-0.573817	5.48491	6.45699
AT1G14580	AT1G14580	C2H2	13.5569	1.38554	-11.98	-11.7224	-2.02216	-2.91993	-2.59162	2.96936	12.2128	2.76529
AT3G46070	AT3G46070	C2H2	-4.72765	-5.2553	7.10716	5.88741	-3.81798	-1.24947	-2.29027	4.02364	6.65519	3.40559
AT3G49930	AT3G49930	C2H2	-4.73922	-3.11698	7.9632	2.51618	0.662808	4.61702	1.73016	-2.28326	5.77925	2.85058
AT5G04390	AT5G04390	C2H2	-3.3826	-4.61133	4.24122	4.43152	-2.49109	-1.27341	-1.45991	2.47244	4.83796	2.17394
AT3G13810	AtIDD11	C2H2	7.10261	-2.1028	-4.76131	-4.97972	-3.11711	-5.17732	-3.41547	5.17589	5.67793	4.62972
AT5G67450	AZF1	C2H2	-0.945348	-6.8322	3.74491	4.70439	-3.50903	0.43598	-0.210362	2.58621	5.27938	2.52419
AT5G66730	ENY	C2H2	11.3912	1.8517	-11.7208	-9.14587	-3.90949	-3.59315	-2.22184	4.51569	10.6408	3.94715
AT3G50700	GAF1	C2H2	11.3056	2.24904	-10.0003	-9.62734	-1.62692	0.0438697	-0.943408	1.33773	10.2688	1.28777
AT2G02080	IDD4	C2H2	14.6844	0.906988	-14.962	-9.37804	-3.6402	-3.7604	-3.67534	4.83409	13.0273	4.26334
AT2G02070	IDD5	C2H2	14.7822	2.51979	-12.7101	-11.6557	-2.72708	-2.58244	-1.83934	2.99268	13.0357	2.71581
AT1G55110	IDD7	C2H2	13.7966	0.648272	-12.2003	-9.30629	-4.07737	-3.83562	-2.92714	4.68021	11.7438	4.17625
AT5G03150	JKD	C2H2	14.0383	1.19371	-12.8623	-11.9291	-3.67588	-3.1723	-3.01314	4.71599	12.6938	4.0115
AT1G03840	MGP	C2H2	12.1963	1.99637	-12.4858	-9.64888	-3.60454	-3.04343	-2.10855	3.87068	11.3426	3.45039
AT3G48430	REF6	C2H2	-5.46827	-6.20001	10.3707	5.68261	-2.25942	1.09576	0.484397	1.24597	8.23363	1.63427
AT2G41835	SAP11	C2H2	-8.26131	0.405745	11.9269	1.90533	-1.16203	1.71112	0.366051	0.261335	8.27376	1.17395
AT2G01940	SGR5	C2H2	5.25832	0.87741	-5.42494	-3.10436	-4.55413	-1.52693	-0.754793	4.21913	4.69235	3.63916
AT1G34370	STOP1	C2H2	-1.228	-5.9921	6.26417	2.36941	-3.01899	2.83007	3.11725	0.0121325	5.22072	2.86818
AT5G22890	STOP2	C2H2	0.492728	-1.21744	2.01787	-0.985041	-2.29772	-0.153225	0.595125	1.40266	1.49926	1.58884
AT1G72050	TFIIIA	C2H2	-30.032	-5.92022	33.9021	20.8973	0.301777	1.24264	-1.48271	0.0838617	28.4852	1.13069
AT1G51220	WIP5	C2H2	2.14299	-10.773	4.44538	1.42064	-1.42264	1.86292	1.43146	0.27884	6.84395	1.46799
AT1G27730	ZAT10	C2H2	2.42075	-6.12071	0.166546	1.33307	-2.24587	-0.364329	-1.60817	2.29302	3.82612	2.00783
AT2G17180	ZAT2	C2H2	-2.17464	-8.04721	6.82898	4.38276	-0.533749	1.46341	1.99894	-0.978567	6.71032	1.46392
AT5G04340	ZAT6	C2H2	5.46638	-2.46652	-3.0915	-1.42815	-2.34173	-0.293737	0.105219	1.88813	3.95746	1.73618
AT3G46090	ZAT7	C2H2	-0.476799	-4.24483	0.711994	4.07729	-1.9741	1.36273	0.921689	0.549449	3.43395	1.49674
AT3G60580	ZAT9	C2H2	4.14273	-1.42447	-2.18992	-2.65394	-2.34763	-1.76081	-3.2944	3.76705	3.15705	3.18072
AT1G68200	AT1G68200	C3H	-4.74812	-8.69387	9.66346	5.43291	-2.85168	3.81487	3.29153	-0.232268	8.57016	3.13732
AT3G12130	AT3G12130	C3H	-3.14325	3.86987	0.611458	-0.326226	-0.438364	1.94624	-2.02628	0.560251	2.89138	1.67325
AT5G58620	AT5G58620	C3H	9.70949	-5.66645	-3.62616	-4.3627	-1.37189	1.79998	0.19448	0.541312	7.18036	1.30565
AT5G63260	AT5G63260	C3H	-4.43802	7.68496	0.287608	-1.23763	-1.88761	0.904496	-3.5291	2.61658	5.13323	2.75583
AT4G16150	AT4G16150	CAMTA	12.5921	-12.3379	-1.73494	-4.7853	7.06048	-0.46464	-2.16483	-4.34797	10.4384	4.95499
AT5G64220	CAMTA2	CAMTA	15.3813	-8.2418	-4.01242	-8.71179	4.5826	0.266863	0.466241	-4.28767	11.3829	3.6244
AT2G22300	CAMTA3	CAMTA	21.716	-12.2147	-6.60139	-11.4284	3.55476	-0.597963	-0.562051	-2.252	16.0913	2.47495
AT5G09410	EICBP.B	CAMTA	19.5574	-10.8477	-7.67826	-12.761	6.95122	0.405651	-0.764856	-4.91855	15.139	4.91803
AT3G22780	TSO1	CPP	-11.6685	-0.385773	13.6975	3.91879	0.0971547	3.1725	0.876669	-1.17199	10.5126	1.82617
AT4G14770	TCX2	CPP	-9.66964	0.0450629	12.9414	2.08983	-0.597019	1.74374	1.16827	-0.407273	9.27438	1.15729
AT3G22760	TCX3	CPP	-6.61675	1.33833	11.1214	0.0829601	-2.99404	1.82694	0.182439	1.43446	7.31405	2.1865
AT2G20110	AT2G20110	CPP	-6.93727	-1.55441	9.8561	2.1872	-1.86657	2.45801	1.04867	0.373173	7.0549	1.80292
AT4G29000	TCX5	CPP	-3.08322	1.5211	6.98857	-2.43876	-0.30149	4.33142	1.85566	-1.4572	4.63235	2.55058
AT3G52440	AT3G52440	Dof	-5.79897	8.70322	1.35518	-0.790209	-1.18603	1.62072	-3.14139	1.72644	6.0229	2.35528
AT5G39660	CDF2	Dof	0.0751932	-1.5809	0.799114	0.639733	0.208583	1.08546	-2.82404	0.47224	1.08806	1.74549
AT3G47500	CDF3	Dof	-6.70469	6.11985	3.31295	1.6807	-2.43573	2.87238	-1.07433	1.17958	5.51804	2.35624
AT1G69570	CDF5	Dof	-12.6649	-0.446974	11.5492	8.75124	-0.794271	1.65066	-1.32465	0.669059	10.9186	1.35987
AT1G29160	DOF1.5	Dof	-5.72029	5.0084	3.73094	1.71429	-1.30929	2.33411	-2.0332	1.03302	4.79803	2.03004
AT1G47655	DOF1.6	Dof	-1.66351	1.76733	-0.39619	0.659211	-1.56807	0.0939314	-2.74935	2.68146	1.46613	2.35389
AT1G51700	DOF1.7	Dof	-8.09013	2.37146	6.13777	4.18106	-1.71989	0.787811	-2.21779	1.93942	6.34921	1.99101
AT1G64620	DOF1.8	Dof	-6.49377	6.21482	2.32725	0.824704	-2.44212	2.14434	-0.651892	1.29578	5.31745	2.05233
AT2G28810	DOF2.2	Dof	-8.77925	5.24237	5.73381	3.49463	-1.81504	1.29125	-1.65049	1.46648	6.86897	1.79918
AT2G37590	DOF2.4	Dof	-6.57835	6.73846	1.12879	0.650084	-3.17769	2.08447	-0.281956	1.68076	5.46011	2.40304
AT2G46590	DOF2.5	Dof	-4.7011	8.8805	-0.486081	-1.82084	-1.1165	1.6353	-3.09261	1.51198	5.8776	2.27224
AT3G45610	DOF3.2	Dof	-7.40217	5.69679	3.17178	1.64947	-1.85682	1.43787	-2.07168	1.56734	5.70378	2.00421
AT3G50410	DOF3.4	Dof	-16.0924	-0.231935	13.1357	10.8042	-1.37556	1.65212	-2.06861	1.34388	13.3391	1.88473
AT4G21030	DOF4.2	Dof	-5.74835	5.99997	1.95941	0.180717	-0.758788	1.93955	-1.67923	0.657477	4.88143	1.58991
AT4G21040	DOF4.3	Dof	-1.62199	-0.277406	1.73776	0.840387	-1.72176	1.72792	-0.999111	1.21213	1.45128	1.67388
AT4G21080	DOF4.5	Dof	-2.50289	2.53871	-0.452117	1.47568	-1.82995	1.26313	-2.46268	2.12563	2.22194	2.26002
AT4G38000	DOF4.7	Dof	-21.2359	0.920845	19.115	14.0886	-1.12429	0.243163	-2.40465	1.58039	18.02	1.72008
AT5G02460	DOF5.1	Dof	-17.6925	2.43604	13.2361	9.11143	-0.694888	1.45203	-2.13299	0.922488	13.7186	1.62691
AT5G60850	DOF5.4	Dof	-6.98829	7.49686	2.50892	0.304002	-2.11456	1.80747	-1.73439	1.60869	6.01853	2.10456
AT5G62940	DOF5.6	Dof	-7.17842	4.46549	3.57606	1.95318	-1.32168	1.31672	-2.09392	1.33226	5.35694	1.77886
AT5G66940	DOF5.8	Dof	-16.3014	0.745417	13.5803	9.89274	-1.45005	1.48126	-1.36855	1.1705	13.3281	1.58459
AT3G55370	OBP3	Dof	-18.4734	0.858526	15.3031	12.1548	-0.52141	1.27426	-1.82962	0.710875	15.2721	1.38021
AT2G36010	E2F3	E2F/DP	5.33327	-4.81862	0.207203	-3.59939	1.88635	4.20293	0.0869274	-2.59331	4.56769	2.87208
AT5G22220	E2FB	E2F/DP	0.279094	-7.09528	4.78796	2.0831	-0.969615	3.40346	0.609323	-0.489617	5.08868	1.95827
AT1G47870	E2FC	E2F/DP	-0.125548	-2.12066	3.11031	-0.0381878	0.383775	3.5199	1.13817	-1.56839	2.16163	2.10365
AT5G14960	E2FD	E2F/DP	-1.66716	-3.93397	4.38536	2.3118	-2.05203	1.99737	0.17266	1.00486	3.76524	1.72479
AT3G48160	E2FE	E2F/DP	2.51175	-5.80792	2.69427	-0.0484224	-0.600903	2.47264	1.33078	-0.587279	3.96638	1.51449
AT1G73730	EIL3	EIL	11.3099	-5.86126	-3.5754	-5.98476	-2.25969	-3.56768	-2.63556	3.63455	8.29947	3.27426
AT3G20770	EIN3	EIL	9.3986	-5.93083	-3.40287	-5.16938	-1.8228	-1.53003	-1.71366	2.64499	7.19483	2.17027
AT2G40220	ABI4	ERF	-24.0924	-0.780935	28.0203	13.1504	-2.54234	1.80185	1.30906	0.86841	22.1564	1.97161
AT5G64750	ABR1	ERF	-29.7305	-2.84903	28.8389	17.4073	-1.82175	4.0623	3.68601	-1.25837	25.6906	3.13811
AT2G33710	AT2G33710	ERF	-27.2019	0.272912	29.6597	16.9773	-0.932802	4.69758	3.62077	-1.66384	24.5686	3.19538
AT3G16280	AT3G16280	ERF	-6.10298	-3.66229	11.8003	1.93168	0.360567	1.00407	1.13392	-0.97467	7.95199	0.964946
AT5G65130	AT5G65130	ERF	-27.9094	-0.964617	29.4559	16.6443	0.61175	4.12005	3.39808	-2.89883	24.8352	3.18634
AT4G23750	CRF2	ERF	-41.0831	5.87813	37.9377	24.941	-1.22696	3.95387	2.73894	-1.27482	34.6037	2.70026
AT4G27950	CRF4	ERF	-27.1574	-4.15371	30.37	18.1795	-2.26435	3.96091	2.12568	-0.513565	25.3858	2.76052
AT4G25480	DREB1A	ERF	6.64782	-10.4436	5.86508	-3.25158	0.364527	1.08294	0.681803	-0.75585	8.12167	0.789563
AT4G25490	DREB1B	ERF	9.06571	-6.08014	1.12339	-5.91111	1.02391	1.04693	0.939882	-1.42624	7.17743	1.21578
AT4G25470	DREB1C	ERF	11.4279	-7.43379	1.58618	-5.52946	0.996777	-0.254985	-0.273715	-0.668484	8.543	0.723494
AT5G51990	DREB1D	ERF	8.83574	-8.09798	1.8615	-5.09477	1.04299	0.728076	0.38092	-1.08394	7.56114	0.94035
AT1G63030	DREB1E	ERF	17.8766	-4.3329	-7.16092	-11.4184	2.81358	-1.51843	-1.13517	-1.38442	13.0852	2.08585
AT1G12610	DREB1F	ERF	8.30286	-3.21011	1.34138	-7.39138	1.9807	-0.215484	0.121875	-1.49105	6.71925	1.43393
AT3G11020	DREB2B	ERF	-24.6343	-2.54688	29.413	14.6066	-1.51452	2.79861	1.58025	-0.218156	23.2445	1.9079
AT2G40340	DREB2C	ERF	-25.2833	-6.3106	32.2666	16.667	-0.96665	1.96326	1.39864	-0.288489	25.3169	1.38065
AT1G75490	DREB2D	ERF	-23.9711	-0.380189	28.452	15.0325	0.577785	3.382	2.52578	-2.22431	22.4999	2.48726
AT2G38340	DREB2E	ERF	-21.2338	0.770613	22.4721	11.5326	-1.05619	2.50006	1.35589	-0.331444	18.6514	1.61152
AT3G57600	DREB2F	ERF	-29.217	2.77112	30.1396	16.165	0.366009	3.5464	2.41134	-1.94402	25.3799	2.41586
AT5G18450	DREB2G	ERF	-23.8316	0.468912	28.809	14.07	-0.975917	2.01276	1.3435	-0.469008	22.3671	1.42774
AT5G25190	ERF003	ERF	-26.3025	-2.8208	31.4982	18.5241	-0.482142	3.89246	2.42153	-1.74785	25.3368	2.59054
AT2G23340	ERF008	ERF	-12.2276	0.85149	15.4176	4.72284	0.40503	2.62279	1.45021	-1.54442	11.417	1.76823
AT5G67190	ERF010	ERF	-21.5945	-0.360117	24.3771	11.0218	0.793669	2.64002	1.7202	-1.98949	19.4678	2.00112
AT3G50260	ERF011	ERF	-21.9618	-0.178677	24.3835	10.9255	1.08309	3.21065	2.0948	-2.59877	19.6038	2.51876
AT1G21910	ERF012	ERF	-21.6526	-3.15396	27.3788	12.2437	0.770328	2.61465	1.72672	-1.99905	21.0033	1.99878
AT1G77640	ERF013	ERF	-17.8761	-4.86361	27.4969	10.6851	0.114033	2.37999	1.50251	-1.49406	19.6116	1.69327
AT1G44830	ERF014	ERF	-20.7625	-1.14856	23.7584	12.0913	0.477072	2.76792	1.72646	-1.99572	19.1005	2.05254
AT4G31060	ERF015	ERF	-21.9352	-4.36344	26.9964	13.7538	-0.438101	2.57429	2.16243	-1.38703	21.3382	1.94075
AT1G19210	ERF017	ERF	-15.2829	-1.99033	19.6025	8.98061	1.25144	4.11308	2.71584	-2.80982	14.9495	2.98941
AT1G74930	ERF018	ERF	6.52187	-7.15349	2.80329	-4.00668	2.79265	-0.196885	-0.601231	-1.82909	6.23905	1.96111
AT1G22810	ERF019	ERF	-21.5205	-1.90751	26.9951	14.0624	0.808056	1.90228	1.25506	-1.69154	20.9408	1.57221
AT1G71450	ERF021	ERF	-23.931	-7.29717	31.1173	14.9089	-0.745847	2.3294	2.03445	-0.911042	24.2333	1.74351
AT1G01250	ERF023	ERF	-13.873	-1.45401	17.8791	6.81428	-0.0285586	1.698	1.19057	-1.0351	13.4007	1.23022
AT5G52020	ERF025	ERF	-13.5359	-2.43791	17.0531	7.20909	-0.13166	0.948577	1.84752	-0.896649	13.0992	1.2046
AT1G12630	ERF027	ERF	-17.0138	-4.2788	20.5213	10.4192	0.253479	1.73162	1.70188	-1.37564	16.4741	1.47377
AT2G44940	ERF034	ERF	-16.1234	-2.28915	19.4076	7.97572	-0.542071	0.713002	0.711328	-0.0872619	15.1146	0.621238
AT3G60490	ERF035	ERF	12.892	-7.63794	-0.999461	-6.83105	-0.538327	-0.542852	0.77703	0.268991	9.4964	0.648153
AT1G77200	ERF037	ERF	-7.39518	-3.18948	11.7391	3.28975	-0.282422	-0.0947807	0.542402	0.02915	8.33771	0.353248
AT2G35700	ERF038	ERF	-17.736	-1.70636	20.1448	10.0136	-0.054717	1.48774	1.11927	-0.811349	16.2773	1.05983
AT4G16750	ERF039	ERF	-23.0868	-1.5801	24.884	13.0574	0.830921	2.29171	1.46891	-1.8062	20.6652	1.77227
AT4G32800	ERF043	ERF	9.05617	-8.68022	1.6775	-5.94057	-0.573452	-0.0594299	0.288196	0.332369	7.99349	0.418676
AT4G28140	ERF054	ERF	-23.4996	-4.09891	30.7538	14.3376	0.27137	4.03057	2.55703	-2.40316	23.4086	2.80886
AT1G36060	ERF055	ERF	-24.0671	2.06536	25.7962	12.2601	0.970152	3.61546	2.25417	-2.56341	21.0935	2.65162
AT5G18560	ERF086	ERF	-26.1745	-0.0849064	27.565	16.2268	-0.397756	5.07131	4.34181	-2.48427	23.3196	3.66222
AT1G28160	ERF087	ERF	-27.0572	-0.0499906	30.1591	18.0232	-0.512733	4.51692	3.43653	-2.19076	24.8694	3.18246
AT4G18450	ERF091	ERF	-24.8928	-0.838803	25.7567	16.5789	-0.146697	3.79671	2.79794	-2.03259	22.2838	2.67847
AT1G06160	ERF094	ERF	-24.5939	0.414781	25.281	14.1443	-0.586253	3.54101	2.62722	-1.57498	21.4951	2.46653
AT3G23220	ERF095	ERF	-27.6926	-0.314782	27.759	17.7026	0.315464	4.03826	2.88209	-2.61121	24.3226	2.95438
AT5G43410	ERF096	ERF	-35.8253	0.826057	30.3716	22.5322	-0.442366	4.78158	3.67102	-2.31956	29.6318	3.35758
AT1G03800	ERF10	ERF	-25.2514	-2.49673	26.6248	15.6564	0.0211516	3.02674	1.66569	-1.50291	22.6941	1.96789
AT5G61600	ERF104	ERF	-25.1724	-2.71314	24.3959	16.4361	0.225501	3.76244	2.65963	-2.31249	22.0939	2.70369
AT5G51190	ERF105	ERF	-28.8703	2.61643	25.9661	16.7966	0.119873	4.03396	2.96926	-2.52869	24.004	2.9564
AT4G34410	ERF109	ERF	-28.9039	2.34853	26.5984	19.8782	-1.86012	4.94709	4.97444	-1.39426	24.7948	3.80833
AT1G28370	ERF11	ERF	-26.3547	-0.422659	27.5976	18.0608	-0.455067	4.57256	3.65713	-2.51527	23.7588	3.36162
AT5G07310	ERF115	ERF	-23.2916	-2.26474	26.9121	15.5943	-0.583561	4.17695	2.99987	-2.07764	21.9336	2.94423
AT1G68550	ERF118	ERF	-26.2367	-0.95412	28.8769	18.4214	0.535684	4.33059	3.02043	-2.74253	24.231	3.11287
AT1G28360	ERF12	ERF	-25.6472	1.4782	25.1309	13.3717	-0.565402	3.11792	3.26778	-1.68976	21.7483	2.53702
AT5G67000	ERF122	ERF	-26.5037	-1.45526	25.7032	16.0083	-0.347668	2.17901	1.64022	-0.807858	22.9071	1.46493
AT2G44840	ERF13	ERF	-32.7212	3.43638	27.8465	18.4973	0.122448	4.46022	3.04518	-2.44437	26.629	3.07893
AT2G31230	ERF15	ERF	-27.1255	0.791474	24.3499	17.0439	-0.0812454	3.59873	2.19781	-1.84874	22.8264	2.41303
AT3G23240	ERF1B	ERF	-27.7994	-4.55959	29.4702	18.6907	-1.24931	3.84005	3.13595	-1.54301	25.4886	2.83702
AT5G47220	ERF2	ERF	-23.7643	-3.29043	25.2646	15.5654	-0.279913	4.36098	2.96549	-2.22541	21.6696	3.00179
AT1G50640	ERF3	ERF	-27.9031	0.478029	28.2278	16.7084	-0.605496	5.52831	3.67957	-2.22659	24.3456	3.61769
AT3G15210	ERF4	ERF	-31.0485	3.04668	30.5026	17.888	-1.2977	4.62585	3.06864	-1.38673	26.5817	3.06306
AT5G47230	ERF5	ERF	-25.8378	-2.041	26.3363	18.8413	0.269508	4.81859	4.14636	-3.15014	23.4204	3.70371
AT4G17490	ERF6	ERF	-26.4317	-3.27831	29.2464	18.2457	-0.613319	4.37163	2.98795	-2.09912	24.6211	3.02338
AT3G20310	ERF7	ERF	-23.9201	-4.85669	29.6862	17.1087	-0.0923542	4.30504	3.16952	-2.16723	23.7246	2.97129
AT1G53170	ERF8	ERF	-25.9863	-1.23386	28.9266	17.0034	-0.00351218	3.97117	2.64488	-2.0447	23.9107	2.69135
AT5G44210	ERF9	ERF	-23.5148	-4.48169	26.0307	17.4333	-1.30175	3.89745	3.38657	-1.78353	22.3214	3.00705
AT1G72360	HRE1	ERF	-26.2003	-1.88526	26.8829	16.4431	-0.827684	3.89407	2.85183	-1.74701	23.2738	2.74979
AT5G13910	LEP	ERF	-24.5489	-4.44173	28.9004	16.3242	-0.611217	4.9488	3.35311	-2.48001	23.5103	3.43852
AT1G46768	RAP2-1	ERF	-27.1219	2.03673	26.4744	13.7351	-0.19625	2.79065	2.01107	-1.4466	22.8918	1.95522
AT4G36900	RAP2-10	ERF	-29.5735	1.84557	28.1515	17.0661	-0.989178	5.0322	3.84123	-2.21731	25.0685	3.55642
AT5G19790	RAP2-11	ERF	-24.7979	-5.01287	25.6932	16.5947	-0.782362	4.7116	3.64264	-2.0769	22.6323	3.30882
AT1G53910	RAP2-12	ERF	-28.1074	-1.23273	31.5653	17.4403	-2.50183	4.22761	3.31718	-0.761111	25.7901	3.22135
AT3G16770	RAP2-3	ERF	-23.1372	1.85233	19.4096	13.9583	-2.26911	3.80182	2.75582	-0.337223	18.9194	2.79331
AT1G78080	RAP2-4	ERF	-4.85509	-5.21491	10.9043	3.29354	1.26179	2.25277	0.925856	-1.78723	7.66503	1.72806
AT1G43160	RAP2-6	ERF	-28.4193	0.267253	31.1967	18.0302	-0.522099	4.95067	4.25808	-2.2518	25.7877	3.54174
AT4G06746	RAP2-9	ERF	-9.59563	-0.552807	14.7861	3.72719	0.252202	2.2348	1.41274	-1.23512	10.1227	1.50601
AT5G25390	SHN3	ERF	-24.2072	-5.64498	29.905	16.3221	-1.08655	1.97921	0.915282	-0.0937908	23.8854	1.3178
AT5G25810	TINY	ERF	-22.2565	-1.2123	25.9497	10.6127	0.164306	1.59134	1.17982	-1.16804	20.3304	1.22946
AT3G46640	PCL1	G2-like	-5.66821	-12.2809	11.9657	8.62633	-0.0428714	3.98077	2.44526	-2.03017	11.5296	2.65908
AT5G05090	AT5G05090	G2-like	-6.06099	-9.80088	10.1787	8.6678	-1.09249	1.6868	1.45661	-0.440694	10.1539	1.3792
AT3G12730	PHL12	G2-like	11.2745	-12.4925	-1.09175	-3.40527	-1.0815	0.527697	-0.163329	0.827131	9.79455	0.847721
AT3G13040	PHL6	G2-like	-8.94432	-3.32106	11.0359	6.0123	-1.70789	0.014213	-1.48181	1.77653	9.00463	1.61035
AT1G68670	HHO2	G2-like	-2.79004	-9.38198	8.7553	6.56115	-2.74142	0.535274	1.18365	1.50713	8.4269	1.9507
AT3G04030	MYR2	G2-like	6.88141	-12.1498	0.433478	-0.0547482	-1.46391	-0.752459	-0.924167	1.79814	7.94114	1.45443
AT4G37180	HHO5	G2-like	7.37798	-11.1905	-0.0109589	-0.259614	-2.06944	-0.495195	-1.31084	2.47561	7.64985	1.99038
AT1G13300	HRS1	G2-like	0.539327	-10.5848	6.07276	4.36897	-2.00509	-0.271069	0.412771	1.41817	7.489	1.44059
AT1G49560	HHO6	G2-like	-1.33793	-8.86727	7.99377	3.95884	-2.16388	-0.808342	-0.481131	1.98752	7.28533	1.73016
AT5G45580	PHL11	G2-like	8.52779	-8.84284	-2.06819	-1.60641	-0.759801	-1.11442	-1.23152	1.62523	7.16002	1.34527
AT2G01060	PHL7	G2-like	7.35631	-7.29233	-1.07954	-0.901935	1.25773	-1.11175	-1.33818	-0.146828	6.0098	1.18067
AT1G25550	HHO3	G2-like	6.14155	-7.15503	-1.03553	-1.10181	-1.91735	-1.13789	-0.752461	2.21213	5.43806	1.80686
AT2G03500	EFM	G2-like	4.90718	-7.299	0.360954	0.601583	0.544812	-0.0538884	0.049557	-0.45805	5.07731	0.412428
AT1G32240	KAN2	G2-like	-1.40295	-5.43468	5.38986	3.66803	0.0392635	-0.150755	-1.81635	0.958404	4.92533	1.15571
AT2G20400	AT2G20400	G2-like	3.66271	-7.16592	1.49567	2.07259	2.45731	-1.14751	-0.828128	-0.845402	4.87502	1.70515
AT2G20570	GPRI1	G2-like	-0.116026	-6.18003	5.34051	2.17074	-1.78674	1.22832	1.36192	0.571128	4.86724	1.46172
AT5G29000	PHL1	G2-like	4.67876	-7.0256	0.140582	0.590804	1.68698	-0.630085	-0.883903	-0.735557	4.86368	1.22286
AT3G24120	AT3G24120	G2-like	2.93836	-6.96268	2.52947	0.256668	-1.39333	0.737827	0.711809	0.618647	4.58962	1.04263
AT2G40260	AT2G40260	G2-like	0.820149	-6.02433	3.42495	0.664945	-1.14591	0.0133666	-2.36774	1.9134	4.03432	1.82127
AT5G42630	KAN4	G2-like	4.74336	-4.94077	-0.837441	-1.44431	1.52008	-0.473586	-1.06903	-0.56664	4.00672	1.14194
AT2G38300	AT2G38300	G2-like	1.0758	-1.77237	2.28396	-1.51338	-0.626574	-0.645829	-1.68707	1.27441	1.98361	1.23426
AT5G25830	GATA12	GATA	-9.29343	-12.7829	13.8382	11.8097	0.229238	4.1807	4.51845	-3.0675	13.875	3.59487
AT1G08010	GATA11	GATA	-10.0238	-10.3522	15.0575	12.4502	1.18884	5.52617	5.32303	-5.1933	13.8644	5.01811
AT3G24050	GATA1	GATA	-11.8433	-5.96943	18.2739	8.12872	1.2763	2.17986	1.4051	-2.3556	13.6316	2.02767
AT4G32890	GATA9	GATA	-10.155	-10.3459	14.6691	10.2896	-1.31918	0.918285	2.66637	-0.0796149	13.2445	1.68373
AT3G45170	GATA14	GATA	-8.32073	-10.6456	13.6657	9.50854	-0.567474	4.34438	5.37488	-2.80022	12.3194	3.90899
AT3G51080	GATA6	GATA	-6.95107	-10.125	12.638	9.00297	-0.190555	2.65223	3.17696	-1.57016	11.349	2.27237
AT3G60530	GATA4	GATA	-5.28074	-11.0949	11.5388	8.73634	0.500089	4.26074	5.20534	-3.80539	10.9033	4.10251
AT1G08000	GATA10	GATA	-7.09564	-9.86529	10.7277	9.45955	1.20934	3.24542	3.0127	-3.23213	10.7956	3.00187
AT3G06740	GATA15	GATA	10.2681	-10.9806	0.00665099	-6.5948	2.22399	0.916743	-0.411309	-1.79558	9.24072	1.72837
AT3G21175	GATA24	GATA	8.44878	-12.1234	2.52481	-3.18676	2.61449	2.13345	0.294108	-2.67755	8.75953	2.39759
AT4G36620	GATA19	GATA	2.80438	-11.6051	5.24869	3.69244	0.838191	3.8535	3.63824	-3.06739	7.82561	3.22873
AT1G51600	GATA28	GATA	-0.81687	-8.66062	10.074	0.0794111	1.67975	1.21972	0.880932	-1.90177	7.68225	1.61449
AT5G49300	GATA16	GATA	4.78367	-8.8023	3.96298	-3.03635	0.0123023	-0.584804	-0.954205	0.54257	6.40048	0.659521
AT2G18380	GATA20	GATA	4.26015	-8.84053	3.06633	1.77934	1.11397	4.20126	3.77283	-3.55147	6.0237	3.56255
AT4G24470	ZIM	GATA	5.50966	-3.40746	-5.55477	-0.397138	2.67647	-1.02345	-1.20702	-1.17399	4.80539	1.90732
AT1G66420	AT1G66420	GeBP	-1.51378	-3.60096	1.50139	4.61682	5.78847	-1.96137	-3.90519	-2.18932	3.5859	4.3248
AT4G00270	GEBP	GeBP	5.9542	-7.73099	1.84894	-2.74355	-0.554063	2.39726	2.04033	-0.962113	5.89865	1.7329
AT4G00250	STKL2	GeBP	-2.10193	-6.50298	-0.761184	8.66154	8.22773	-1.65625	-3.44814	-4.90104	6.38186	5.93179
AT2G01570	RGA	GRAS	-18.1076	-9.89121	21.0156	15.679	-0.733017	0.991731	-1.14364	0.753139	19.0989	1.06327
AT2G06200	AtGRF6	GRF	7.50767	-2.25483	-6.16891	-3.8385	0.0337748	-0.257167	-1.59859	0.748061	6.01629	0.982181
AT2G46680	ATHB-7	HD-ZIP	14.5287	-8.07619	-8.87499	-6.31463	0.405451	5.65815	3.58715	-3.16789	11.1932	3.85467
AT4G17460	HAT1	HD-ZIP	15.3924	-8.86059	-6.159	-3.21824	1.85097	3.25189	1.17165	-2.86578	10.9803	2.62561
AT2G22430	ATHB-6	HD-ZIP	15.0698	-6.56639	-7.98378	-4.64132	1.81533	5.38012	2.20009	-3.71727	10.8205	3.77884
AT5G47370	HAT2	HD-ZIP	12.7227	-12.0185	-4.59649	-1.50853	3.64752	2.64688	0.206709	-3.13818	10.367	3.0207
AT4G37790	HAT22	HD-ZIP	9.70602	-12.7574	-3.24125	4.09143	2.99535	2.87222	0.879077	-3.40507	9.71239	2.98873
AT3G61890	ATHB-12	HD-ZIP	9.72124	-8.67755	-6.15782	-2.22344	4.09335	2.03275	0.812638	-4.11768	8.14872	3.48873
AT1G30490	ATHB-9	HD-ZIP	8.87623	-10.031	-1.86998	-0.544228	3.59171	3.29245	0.204373	-3.70588	7.74633	3.39879
AT1G52150	ATHB-15	HD-ZIP	8.07368	-10.5416	-0.587494	0.396346	3.54508	2.84297	-0.0530043	-3.65367	7.63858	3.27642
AT5G65310	ATHB-5	HD-ZIP	9.97789	-6.18688	-5.09163	-1.28861	1.60002	1.24769	0.952624	-1.76532	7.38794	1.53897
AT5G52170	HDG7	HD-ZIP	-2.70774	8.31718	3.43851	-7.52975	-4.31818	-3.5007	-3.06005	5.69161	6.93906	4.68803
AT4G40060	ATHB-16	HD-ZIP	9.50306	-6.12546	-3.25991	-1.21363	1.76351	0.82243	-1.499	-0.981859	6.82224	1.52694
AT1G70920	ATHB-X	HD-ZIP	7.49556	-8.49169	-1.7579	1.32077	3.32611	1.27742	0.0823695	-3.06858	6.64864	2.67481
AT1G69780	ATHB-13	HD-ZIP	8.7899	-5.2765	-3.99497	-1.22456	0.492887	0.0918228	0.87488	-0.670217	6.37274	0.660857
AT1G73360	HDG11	HD-ZIP	-2.70334	7.92639	3.00409	-6.04793	-5.11998	-4.30588	-2.4882	6.45177	6.17928	5.32642
AT4G00730	ANL2	HD-ZIP	-1.93977	6.8141	3.01511	-5.98986	-4.13079	-3.58859	-2.70851	5.04487	5.60541	4.30054
AT3G01220	ATHB-20	HD-ZIP	3.45151	-8.09811	1.08874	2.96235	1.21813	-0.0729173	0.713163	-1.22392	5.39643	1.06381
AT2G36610	ATHB-22	HD-ZIP	-0.810311	-6.82288	5.09871	3.81311	0.955619	0.886578	0.531484	-1.09009	5.39556	0.958835
AT5G66700	ATHB-53	HD-ZIP	6.52259	-5.26255	-1.32811	-0.41308	0.0519962	-1.30873	-0.0720067	0.276941	4.9029	0.711988
AT4G36740	HB-5	HD-ZIP	6.36098	-4.4948	-3.1153	-1.79424	-1.2532	-0.96081	-0.327137	1.3288	4.87422	1.15455
AT3G01470	HAT5	HD-ZIP	5.19054	-6.25726	0.368677	0.792274	0.842822	-0.60249	0.591422	-0.7274	4.72075	0.806124
AT5G03790	ATHB-51	HD-ZIP	6.82293	-3.25941	-2.10013	-2.19534	-0.58327	-0.971859	0.874498	0.37349	4.70008	0.849582
AT3G61150	HDG1	HD-ZIP	-2.63784	3.56831	3.7909	-2.99415	-4.52774	-3.19772	-2.57843	5.47894	3.75415	4.53037
AT5G62020	HSFB2A	HSF	14.5197	-11.5568	-1.90908	-8.21255	0.780055	-0.176397	-1.23171	0.00272609	11.5854	0.828444
AT3G24520	HSFC1	HSF	10.7584	-7.88004	-0.822574	-4.78914	1.05139	0.626549	-0.372808	-0.805932	8.15643	0.861045
AT3G02990	HSFA1E	HSF	4.80703	-7.24535	1.90782	-2.31978	3.32372	-0.477315	-0.607667	-2.14274	5.24699	2.32617
AT5G16820	HSFA1B	HSF	6.54943	-4.93899	0.382329	-3.73358	1.26632	0.667635	-0.0138864	-1.19317	5.18385	1.05531
AT4G11660	HSFB2B	HSF	4.67071	-6.37185	1.97497	-1.89221	2.00554	-0.258897	-0.67991	-1.08932	4.80424	1.38299
AT3G22830	HSFA6B	HSF	2.74165	-6.09196	3.52994	-0.827004	1.75244	1.19122	0.109125	-1.67368	4.38438	1.50861
AT4G18880	HSFA4A	HSF	4.1748	-2.86742	2.39832	-4.78057	3.39278	0.0301844	-0.757064	-2.28916	4.24138	2.40068
AT2G41690	HSFB3	HSF	-0.122979	-5.16328	4.69359	1.66865	0.703405	2.5703	2.6301	-2.31876	4.13116	2.32251
AT5G43840	HSFA6A	HSF	4.32414	-3.10479	0.719984	-3.92474	2.24995	0.472589	-0.601439	-1.67104	3.798	1.67224
AT1G46264	HSFB4	HSF	-0.626814	-2.90174	5.30617	-0.52526	0.693545	0.386524	-0.0737897	-0.622932	3.50486	0.573631
AT1G65620	AS2	LBD	-25.0804	-9.12395	32.3471	17.9715	-2.92362	3.07284	3.0942	-0.310361	25.9272	2.91602
AT2G30340	LBD13	LBD	-26.7462	-9.12885	35.8072	18.7686	-3.94327	3.3093	4.58209	0.257054	27.9624	3.79217
AT2G42430	LBD16	LBD	-14.9642	-9.98163	21.5899	12.3927	-4.91053	3.54333	3.73448	0.857951	17.539	4.03115
AT2G45420	LBD18	LBD	-19.4308	-10.0039	26.1567	16.082	-4.64564	3.60226	3.77189	0.907157	21.4433	3.92869
AT2G45410	LBD19	LBD	-8.47466	-11.5332	16.0123	9.76803	-6.05804	2.73592	4.43564	2.26629	13.5193	4.6954
AT1G06280	LBD2	LBD	-16.1157	-6.65382	20.8287	10.7099	-1.97673	3.83337	3.8819	-1.31488	16.6664	3.18894
AT3G26620	LBD23	LBD	-10.8832	-6.89651	14.7796	8.26871	-2.68792	0.980613	1.3216	0.903465	12.1912	1.887
AT5G63090	LOB	LBD	-24.1523	-7.2037	29.0183	15.4216	-2.02772	3.707	3.12589	-0.888205	23.6102	2.86228
AT5G61850	LFY	LFY	3.10514	-4.00714	-0.990802	0.289634	-1.66222	0.0121867	0.0572676	1.15825	2.95082	1.16343
AT2G45660	SOC1	MIKC_MADS	-23.095	-6.91788	25.9705	17.627	0.42722	1.28401	-1.21442	-0.205873	22.5113	1.05313
AT5G62165	AGL42	MIKC_MADS	16.512	-7.09626	-5.61769	-6.45245	2.59848	2.3645	-1.60235	-1.94339	11.4664	2.46205
AT1G60920	AGL55	M-type_MADS	14.1341	-10.1611	-3.13431	-7.66962	-1.01241	0.0459396	0.375172	0.633765	10.9545	0.723196
AT5G48670	AGL80	M-type_MADS	14.1341	-10.1611	-3.13431	-7.66962	-1.01241	0.0459396	0.375172	0.633765	10.9545	0.723196
AT3G58780	SHP1	MIKC_MADS	-3.18441	-4.87087	5.74577	4.65464	0.0174951	-0.549912	-0.655037	0.397002	5.39044	0.494365
AT5G20240	PI	MIKC_MADS	-3.62855	-0.00198844	6.14896	0.50483	0.212727	1.56869	-2.91972	0.488344	4.03922	1.92905
AT1G69120	AP1	MIKC_MADS	-3.39424	3.05526	2.79451	-0.81735	0.682079	0.510278	-2.13152	0.107326	3.09095	1.3048
AT1G77080	MAF1	MIKC_MADS	-2.60959	0.274041	4.55228	-0.624229	0.835186	-1.22551	-3.69604	0.956834	3.02015	2.18534
AT1G24260	2021-09-03	MIKC_MADS	-3.75357	0.410616	3.33215	1.49363	1.29167	0.157145	-2.51686	0.0470009	3.00235	1.60927
AT5G15800	2021-09-01	MIKC_MADS	-1.81839	-1.84609	3.48251	1.41973	1.28431	-0.728069	-3.03956	0.308259	2.61248	1.85569
AT5G13790	AGL15	MIKC_MADS	0.573156	1.78244	0.972141	-3.4551	1.14117	0.220284	-1.71715	-0.289271	2.33697	1.1943
AT2G45650	AGL6	MIKC_MADS	1.16433	1.94943	-0.158906	-3.2997	0.820003	0.560627	-1.97351	-0.0396602	2.31225	1.26267
AT3G57230	AGL16	MIKC_MADS	1.03602	0.604115	1.45932	-3.32402	0.180328	0.77893	-1.00499	0.0423656	2.20638	0.741854
AT3G54340	AP3	MIKC_MADS	-1.78902	-0.56701	2.98122	0.680145	-0.640224	-0.411835	-2.28221	1.35312	2.03686	1.48746
AT1G31140	AGL63	MIKC_MADS	1.32222	-0.528526	1.07877	-2.21891	0.133603	-0.0433289	-1.59947	0.420847	1.64164	0.905359
AT5G10140	FLC	MIKC_MADS	-0.217036	-0.279549	2.46258	-1.21461	1.82953	-0.323041	-4.83963	0.564568	1.58363	2.90265
AT4G18960	AG	MIKC_MADS	-0.839806	-1.31651	1.99036	0.904922	0.194783	0.669818	-2.03806	0.428174	1.53649	1.24964
AT3G61120	AGL13	MIKC_MADS	-0.776355	1.26856	1.41007	-1.67469	0.55207	-0.324869	-1.5536	0.287758	1.52664	0.93757
AT2G03710	AGL3	MIKC_MADS	-0.14251	1.6207	0.2654	-1.43864	1.27265	-0.808918	-2.08056	-0.0517159	1.26014	1.40349
AT2G22540	SVP	MIKC_MADS	0.248219	-0.561782	1.5182	-1.11711	0.748556	-0.266013	-2.26292	0.506251	1.14428	1.36655
AT1G72740	AT1G72740	MYB_related	-35.6493	5.24454	20.2574	26.1967	-3.74045	7.42528	8.89993	-2.49537	27.8724	6.56029
AT5G67580	TRB2	MYB_related	-31.8445	4.45061	18.5899	25.7061	-4.99772	8.15597	9.68126	-1.78435	25.618	7.25382
AT2G47460	MYB12	MYB	15.7315	0.683291	-13.0139	-10.8304	-2.2511	-0.179846	-0.00983072	1.6155	13.1758	1.58529
AT5G10280	MYB92	MYB	15.0567	-2.28794	-10.8405	-9.73086	0.0591358	1.04203	-0.483898	-0.14466	11.9572	0.655379
AT4G38620	MYB4	MYB	14.2656	-4.95174	-7.84005	-8.85844	-1.17686	0.970833	-0.85916	1.03746	10.8679	1.17499
AT2G02820	MYB88	MYB	-7.38617	-5.94844	15.6395	5.6883	0.870399	2.50302	0.201237	-1.3742	10.8154	1.60635
AT2G38090	AT2G38090	MYB	-8.00392	-7.83526	7.36771	11.771	4.58103	-1.95848	-3.83349	-1.37557	10.2562	3.63945
AT1G22640	MYB3	MYB	13.5907	-1.70998	-7.41465	-8.42417	-1.23385	-0.130516	-0.541841	1.1161	10.1597	0.98702
AT5G12870	MYB46	MYB	13.7899	-3.22496	-7.7348	-7.28311	-0.804666	1.0357	0.0105853	0.241452	10.1403	0.757237
AT3G61250	AtMYB17	MYB	13.9954	-6.8175	-5.03722	-6.15679	-2.51901	1.96043	0.661485	1.21649	10.0266	1.97238
AT5G11510	MYB3R4	MYB	13.2495	-7.43374	-6.91151	-4.7842	-0.688491	-0.676618	-0.224389	0.781583	9.87967	0.69038
AT4G32730	PC-MYB1	MYB	12.273	-8.16195	-7.35544	-3.54783	-0.422503	-0.451951	-0.437851	0.608435	9.5289	0.523074
AT5G58900	AT5G58900	MYB_related	-4.50054	-8.38272	0.542967	12.2602	10.6045	-2.05188	-3.7079	-5.39949	8.9653	7.29136
AT1G09540	MYB61	MYB	11.5622	-8.30996	-2.39521	-3.79818	-1.3502	0.753923	-0.591992	1.10626	8.57789	1.1495
AT4G05100	AtMYB74	MYB	9.61354	-0.977409	-7.92945	-7.14457	-1.09996	-0.160599	-0.834402	1.19691	8.10216	1.02679
AT5G14340	AtMYB40	MYB	10.9064	-4.87276	-5.35503	-5.62331	-0.86513	1.74992	-0.662097	0.526014	8.101	1.20908
AT3G12820	AtMYB10	MYB	10.5062	-6.44639	-4.88995	-5.32671	0.178163	0.982834	-1.22143	0.158044	8.05699	0.915096
AT5G08520	SRM1	MYB	-3.89371	-7.88341	-0.333385	10.7886	9.53464	-2.60561	-4.76902	-3.77946	8.02866	6.68508
AT1G18570	MYB51	MYB	10.5517	-4.31601	-5.17528	-6.64149	-1.46094	1.39843	0.221876	0.759624	8.02232	1.22544
AT5G02320	MYB3R5	MYB	9.85716	-6.73127	-6.53542	-3.23442	-0.117381	-0.214579	0.0491685	0.114799	7.84456	0.150956
AT3G12720	ATY53	MYB	9.82552	-8.00015	-2.16919	-4.99911	-0.794518	1.08363	-0.699149	0.725171	7.81245	0.965293
AT4G28110	AtMYB41	MYB	10.0021	-3.44269	-6.46089	-5.31525	-0.472337	0.968269	0.134089	0.0634792	7.63947	0.595097
AT1G06180	ATMYB13	MYB	10.4588	-6.65149	-2.62537	-3.98399	-0.957255	0.944443	-0.985342	0.862542	7.62518	1.08299
AT4G17785	MYB39	MYB	9.85762	-2.53287	-6.42601	-5.97322	-0.458458	1.46526	0.00831573	-0.0327222	7.61848	0.840047
AT5G56110	MYB80	MYB	10.1132	-3.17511	-5.48296	-5.9383	-0.0172376	0.595229	-1.79082	0.442252	7.5864	1.09678
AT5G62470	MYB96	MYB	-4.40343	-6.3045	9.99404	3.92917	-2.20359	-0.676918	-0.417369	2.12366	7.56905	1.79383
AT5G54230	MYB49	MYB	9.73399	-3.09304	-6.0791	-6.04933	-1.14038	0.908441	-0.268946	0.671562	7.53524	0.938399
AT3G27785	MYB118	MYB	9.18738	-2.09473	-6.14604	-7.06965	-1.79497	0.110055	-0.539969	1.39917	7.46496	1.33077
AT1G08810	MYB60	MYB	1.96351	-10.0218	7.70485	1.97063	-1.60106	-1.852	-0.992565	2.15461	7.45844	1.8537
AT3G23250	MYB15	MYB	-4.80112	-6.00881	9.57882	4.21242	-0.926853	2.97782	2.78994	-1.25488	7.44833	2.30001
AT5G16600	MYB43	MYB	10.2323	-4.29492	-4.68707	-4.93282	-0.576431	0.572229	-1.69879	0.93055	7.43994	1.19197
AT5G49330	MYB111	MYB	9.39423	-2.05894	-5.99166	-6.59721	-0.817502	0.511354	-0.419055	0.691983	7.41651	0.726628
AT1G49010	AT1G49010	MYB	-5.0448	-5.59266	2.97322	9.6982	9.04019	-1.50708	-3.27808	-4.45596	7.27069	6.18028
AT3G02940	MYB107	MYB	8.05603	-9.27814	-1.96945	-3.65912	0.248961	0.306508	-1.39098	0.281419	7.22307	0.835305
AT3G28910	MYB30	MYB	-2.75778	-6.68631	9.60055	3.35149	-1.41461	-0.532643	-1.04106	1.6552	7.13299	1.37405
AT1G16490	MYB58	MYB	9.49509	-5.94015	-3.06172	-4.40316	0.083711	0.759599	-0.597733	0.021799	7.08007	0.554943
AT3G11440	ATMYB65	MYB	9.33416	-5.09489	-3.53098	-4.94922	-1.30394	3.05504	2.36883	-1.0862	6.96541	2.27478
AT4G01680	MYB55	MYB	-2.2082	-6.46401	9.46183	2.69615	-2.15497	0.603945	-0.548557	1.59478	6.84147	1.61133
AT4G18770	MYB98	MYB	8.1903	-1.55085	-5.41366	-6.87862	-1.74877	-0.160641	-1.4148	1.72731	6.78529	1.57393
AT3G10580	AT3G10580	MYB_related	-1.53662	-7.93636	-1.03156	8.11877	9.95371	-2.34372	-3.2	-5.51381	6.60562	6.94998
AT1G09770	CDC5	MYB	-2.24829	-7.57802	7.61986	3.11431	-0.286631	1.77813	0.56884	-0.517316	6.58373	1.03921
AT3G08500	MYB83	MYB	6.31963	-8.46937	2.82816	-3.13441	0.239887	0.734966	-0.145525	-0.350518	6.53154	0.477649
AT5G58850	ATMYB119	MYB	7.86767	-2.39288	-4.78789	-6.80779	-3.26914	0.212511	-0.354345	2.19474	6.51996	2.25869
AT3G50060	MYB77	MYB	8.2618	-7.19237	-1.59344	-2.32259	-1.52563	0.306933	1.78759	0.370927	6.47804	1.35819
AT5G40330	MYB23	MYB	8.8836	-3.48914	-3.9632	-4.4944	-1.24968	-0.12035	-1.42552	1.46066	6.44601	1.3287
AT3G09230	MYB1	MYB	8.83246	-4.88916	-3.09684	-3.17459	0.0242894	3.25023	3.17568	-2.50287	6.33061	2.76999
AT5G62320	MYB99	MYB	8.32781	-6.1709	-2.21733	-3.00266	-0.885908	1.12506	-0.805959	0.679437	6.29866	1.0261
AT4G37260	MYB73	MYB	7.92378	-6.29861	-3.0836	-3.26214	-1.92528	2.61474	3.38208	-0.630845	6.24601	2.5443
AT1G74840	AT1G74840	MYB_related	-0.668232	-6.31142	-2.48456	8.25861	7.19409	-1.59789	-3.86454	-3.92942	6.17238	5.27496
AT1G18960	AT1G18960	MYB_related	0.948979	-7.86185	6.92071	0.825112	-1.3402	1.63075	0.224334	0.529713	6.08586	1.2266
AT5G47390	KUA1	MYB_related	-1.34659	-6.16914	-1.74676	8.23204	6.89738	-2.02473	-2.87561	-3.70832	6.06695	4.9316
AT1G17950	MYB52	MYB	8.40627	-3.77047	-3.55049	-3.71397	-0.30367	0.221519	0.337146	0.0423996	6.04301	0.279667
AT5G56840	AT5G56840	MYB_related	-1.30914	-6.20573	-2.05238	8.04199	9.19308	-1.86819	-3.13312	-6.23674	6.01468	6.72485
AT3G47600	MYB94	MYB	5.00688	-8.49054	2.99069	-0.607062	-1.37184	-1.49175	-1.62713	2.0139	5.9489	1.7585
AT5G67300	MYB44	MYB	6.82715	-7.2142	-2.14251	-2.06775	-0.276962	4.41742	4.02823	-2.57367	5.83772	3.3968
AT1G19000	AT1G19000	MYB_related	-1.47757	-6.23333	-1.27469	7.69681	8.22338	-2.21327	-4.14925	-3.96098	5.8163	5.89705
AT5G04760	AT5G04760	MYB	-1.40822	-6.82999	1.29899	7.10138	7.24065	-0.519673	-2.42671	-4.74722	5.79489	5.19842
AT2G23290	AtMYB70	MYB	6.12282	-7.68378	-0.945139	-0.729185	-1.55318	1.72761	2.74576	-0.509632	5.63731	1.97849
AT1G34670	AtMYB93	MYB	3.87237	-7.97348	3.23968	0.00725988	-0.56776	1.37804	-0.478379	0.338684	5.44319	0.904153
AT5G61620	AT5G61620	MYB_related	-1.7273	-4.73335	-2.81782	7.46844	7.25741	-2.15967	-3.2643	-3.54339	5.42484	5.15799
AT1G69560	MYB105	MYB	6.81336	-5.13809	-3.23031	-2.06572	-0.774047	1.44129	1.83794	-0.509066	5.29926	1.33135
AT1G79180	ATMYB63	MYB	-1.51301	-5.71411	6.64741	2.32714	-0.901039	0.218592	-1.13576	1.17093	5.28459	1.06707
AT3G49690	RAX3	MYB	3.06691	-6.75719	4.65378	-0.670886	-1.13078	0.715901	0.00190494	0.529552	5.07122	0.830302
AT4G01280	RVE5	MYB_related	-5.26749	-0.856135	5.1255	4.86621	4.56302	0.585875	-1.89098	-3.08783	4.98965	3.37973
AT3G30210	ATMYB121	MYB	6.53476	-1.55686	-3.40758	-4.17299	0.15408	0.456271	0.362185	-0.389802	4.91457	0.378661
AT3G01530	MYB57	MYB	-3.30875	-4.23938	3.52293	5.55612	0.827239	1.39039	0.0854227	-1.06958	4.88589	1.06277
AT1G66370	MYB113	MYB	5.90941	-1.67478	-5.02094	-3.63698	-1.04672	1.34291	0.365072	0.405558	4.87415	0.985268
AT2G26960	AtMYB81	MYB	6.20723	-4.79298	-1.41306	-2.52033	-1.4407	2.88435	2.19406	-0.480279	4.77021	2.07744
AT5G05790	AT5G05790	MYB	-0.877754	-6.59681	1.94945	4.22607	6.57945	-1.67259	-3.32697	-2.89468	4.67356	4.65842
AT1G74650	ATY13	MYB	1.12985	-6.07716	5.07208	1.20272	-2.29208	-0.315894	-0.37779	2.02016	4.65261	1.76485
AT3G11280	AT3G11280	MYB	-3.31088	-3.60125	1.56428	5.97141	7.00948	-2.92932	-4.6064	-2.00042	4.5438	5.20699
AT2G32460	MYB101	MYB	5.15361	-4.70944	0.503297	-2.34217	2.20349	7.91368	5.5369	-5.94472	4.2423	6.05285
AT1G70000	AT1G70000	MYB_related	-0.0921096	-4.13808	-2.51106	5.31829	6.18579	-3.08371	-4.69694	-2.06923	4.13181	4.85661
AT3G06490	MYB108	MYB	0.363724	-4.66597	4.64867	1.6345	1.57316	1.23159	0.124129	-1.36095	3.88176	1.3222
AT3G53200	MYB27	MYB	1.49678	-4.29462	-1.54745	3.94464	1.02753	0.829331	-0.9297	-0.693902	3.58696	1.01256
AT5G02840	RVE4	MYB_related	-3.81384	-0.835306	3.01146	3.69371	5.45166	0.628652	-1.93432	-3.76393	3.50707	3.9995
AT5G06100	MYB33	MYB	3.4678	-4.31747	-1.546	-0.240492	-0.528368	2.91558	2.64119	-1.27735	3.23403	2.15017
AT1G15720	TRFL5	MYB_related	-3.51412	3.95858	1.51888	-0.813753	-1.65901	0.223717	0.306555	1.12605	3.19678	1.17818
AT5G59780	MYB59	MYB_related	3.68272	-0.154097	-3.65308	-1.6415	2.09284	0.0825736	-0.625035	-1.44246	3.10086	1.51165
AT1G49950	TRB1	MYB_related	-3.89666	0.337526	2.68095	2.10158	-0.580679	-1.69145	-0.499408	0.934262	2.97365	1.0765
AT5G17800	MYB56	MYB	3.05964	-3.55377	-1.8488	0.576708	-1.69946	-0.172984	-0.0483784	1.41641	2.88452	1.27319
AT1G68320	MYB62	MYB	-1.47261	-2.05059	2.19439	2.93447	0.00861657	-0.626244	-1.8429	0.762737	2.52688	1.10298
AT5G52660	RVE6	MYB_related	-2.90539	0.231262	2.34081	1.97403	4.8793	0.805568	-1.90144	-3.30903	2.3943	3.60395
AT1G25340	MYB116	MYB	-1.04391	-1.88186	0.523036	2.95712	0.692832	2.73423	0.78626	-1.77778	2.127	1.84858
AT1G18330	RVE7	MYB_related	-0.765379	-0.389862	0.898022	0.714118	4.27585	0.722452	-1.55702	-3.0715	0.816908	3.19526
AT3G09600	RVE8	MYB_related	-0.618177	-0.449002	0.636604	0.860388	4.27201	0.362147	-2.03446	-2.93923	0.74902	3.22131
AT1G01060	LHY	MYB_related	-0.64528	-0.205588	0.918484	0.388616	4.58151	0.0189467	-1.90707	-2.77483	0.683435	3.28256
AT2G46830	CCA1	MYB_related	-0.578434	-0.190184	0.723856	0.311046	3.14152	-0.823394	-2.01934	-1.39013	0.569721	2.32806
AT5G17300	RVE1	MYB_related	-0.340029	0.160412	-0.465242	0.588623	4.44612	1.08937	-1.35082	-3.15442	0.484248	3.2896
AT3G10113	RVE7L	MYB_related	-0.162793	-0.133507	-0.415506	0.65216	3.87142	1.13041	-1.25729	-2.91802	0.462383	2.95469
AT1G32510	ANAC011	NAC	7.04738	-12.4668	5.79312	-0.326779	0.41756	0.230035	-1.46958	0.206433	8.92103	0.882198
AT1G34180	anac016	NAC	16.8335	-7.60893	-4.43511	-8.56453	1.582	0.301429	-1.81917	-0.501124	11.9822	1.4267
AT1G54330	ANAC020	NAC	9.54752	-11.9296	4.02137	-0.763703	0.14667	-0.568261	-2.94023	1.35052	9.12934	1.80757
AT1G65910	anac028	NAC	11.4369	-9.90849	0.608941	-4.89306	0.432304	-0.511126	-2.1595	0.672778	9.15413	1.28471
AT2G24430	ANAC038	NAC	12.6499	-8.18102	-3.23379	-5.68616	0.947234	-0.938407	-3.62846	0.843958	9.39477	2.1393
AT3G04060	anac046	NAC	11.315	-13.6881	1.41296	-3.20857	1.16051	-1.18672	-3.4612	1.037	10.3817	2.18397
AT3G10480	ANAC050	NAC	11.0798	-10.833	0.726848	-3.95948	0.418324	-0.390211	-2.38914	0.785932	9.20312	1.41806
AT3G10490	ANAC052	NAC	11.7592	-10.8243	0.4382	-4.63576	-0.200327	0.666068	-1.56374	0.672444	9.56499	1.05451
AT3G17730	anac057	NAC	13.3997	-8.3674	-1.33869	-6.21683	1.25504	-0.235187	-2.92523	0.306687	9.805	1.79281
AT3G18400	anac058	NAC	11.8662	-11.3227	-2.14519	-5.87825	2.18774	0.34055	-2.93437	-0.957831	9.90248	2.15755
AT4G17980	anac071	NAC	9.97059	-10.8098	-1.22954	-6.30872	-0.449004	0.184238	-1.66765	0.944031	8.94483	1.10507
AT4G29230	anac075	NAC	11.5335	-9.8145	-1.87556	-6.00476	1.63939	0.767539	-1.48606	-0.758594	9.2993	1.42056
AT4G36160	ANAC076	NAC	13.5784	-10.6136	-3.22438	-8.34829	1.49508	0.0261909	-2.26493	-0.147987	10.9329	1.54801
AT5G18270	ANAC087	NAC	8.86876	-12.0872	2.5204	-0.779138	1.29102	-0.920264	-3.22428	0.651379	8.77818	2.01011
AT5G39820	ANAC094	NAC	-1.10525	-8.24296	10.4666	2.95744	0.134266	2.47236	1.18785	-1.25331	7.81689	1.58093
AT5G46590	anac096	NAC	8.90396	-11.8908	4.65949	-1.35673	0.524633	0.542992	-2.81683	0.549449	9.02216	1.67796
AT5G64060	anac103	NAC	11.4957	-9.17517	-0.656051	-6.39085	0.591634	0.0232354	-2.00573	0.447851	9.16556	1.2044
AT1G32870	ANAC13	NAC	10.1673	-8.40083	-1.23968	-3.93409	0.293958	0.158622	-2.97318	0.967025	7.91749	1.75908
AT1G19040	AT1G19040	NAC	11.0341	-9.89704	-0.953971	-4.77043	0.673577	0.40634	-2.36747	0.386976	8.90895	1.43419
AT3G12910	AT3G12910	NAC	-1.46107	-8.43509	10.1945	3.65343	1.18795	2.61086	2.14617	-2.68202	7.88791	2.40592
AT4G10350	BRN2	NAC	9.26941	-12.6728	5.12622	0.0596246	0.047678	-0.714761	-3.83939	1.67068	9.52209	2.31191
AT2G43000	JUB1	NAC	-3.25848	-10.1071	14.6884	5.77416	1.61501	2.39653	0.527801	-2.10609	10.7899	1.96517
AT1G01720	NAC002	NAC	10.906	-5.51892	-1.75854	-6.91517	3.62874	-2.74448	-4.50177	-0.109949	8.11604	3.53575
AT1G02230	NAC004	NAC	0.257729	-11.1778	7.17559	3.85248	-1.42354	0.960201	-0.0990234	0.944592	7.98618	1.12753
AT1G02250	NAC005	NAC	4.15973	-9.75245	5.29725	-0.6801	-0.595932	0.820205	-1.96337	1.02273	6.84834	1.39049
AT1G12260	NAC007	NAC	14.5476	-9.41602	-3.65488	-7.99892	1.10356	-0.580719	-3.0619	0.413913	11.0604	1.82323
AT1G28470	NAC010	NAC	14.3431	-10.2461	-4.16765	-8.61944	1.55258	0.710509	-1.4063	-0.55863	11.3062	1.31439
AT1G32770	NAC012	NAC	6.40266	-4.66221	-0.301646	-4.45269	-0.380035	-0.764581	-1.88171	1.44789	5.17613	1.38364
AT1G34190	NAC017	NAC	10.0952	-12.2794	-0.272893	-4.86437	0.441048	-0.871542	-2.36769	0.994881	9.36365	1.49854
AT1G52880	NAC018	NAC	13.0675	-5.52674	-4.29642	-7.75002	2.25724	-2.51949	-4.36305	0.758615	9.56994	3.01755
AT1G52890	NAC019	NAC	12.8488	-3.73896	-5.84596	-9.06363	2.54204	-2.37439	-5.56257	0.602092	9.78072	3.54314
AT1G61110	NAC025	NAC	15.7273	-2.44318	-6.93943	-10.3464	1.93096	-2.83796	-5.20371	0.887637	11.612	3.30802
AT1G69490	NAC029	NAC	10.9953	-3.43615	-2.69079	-7.50859	3.68069	-1.29969	-4.3778	-0.953824	8.05359	3.32341
AT1G71930	NAC030	NAC	7.26936	-4.18841	-0.93382	-5.02	2.5278	-2.10618	-4.06548	0.15079	5.60938	2.84759
AT1G76420	NAC031	NAC	13.8348	-11.0579	-2.35692	-4.56858	1.88618	-2.7096	-3.63872	0.764358	10.5799	2.66494
AT2G02450	NAC035	NAC	7.54969	-5.28953	1.23303	-4.72655	2.63392	-0.128567	-1.30064	-1.66906	6.01269	1.94744
AT2G18060	NAC037	NAC	15.866	-9.42834	-5.50358	-8.97304	0.470758	-0.548765	-1.59611	0.607375	12.0454	1.02547
AT2G46770	NAC043	NAC	15.3393	-13.8539	0.0283805	-4.41266	-0.684369	0.100921	-2.51583	1.60969	12.1737	1.71701
AT3G03200	NAC045	NAC	10.2746	-10.8311	1.08353	-4.10543	0.0307567	0.824282	-1.79184	0.440739	8.90144	1.15813
AT3G04070	NAC047	NAC	8.2851	-1.22167	-2.35236	-8.06292	4.64953	-2.48551	-6.20523	-1.0238	6.77916	4.50686
AT3G10500	NAC053	NAC	11.671	-10.1694	0.180829	-4.4703	-0.617615	-0.2334	-1.75734	1.31858	9.26825	1.27108
AT3G15170	NAC054	NAC	12.2326	-12.3265	-1.10375	-4.07306	1.81638	-0.300176	-2.92814	-0.0163586	10.2052	1.95394
AT3G15500	NAC055	NAC	12.6363	-4.07581	-4.29969	-10.6678	5.06317	-1.64701	-5.30926	-1.47543	9.97187	4.31573
AT3G15510	NAC056	NAC	11.4451	-7.96527	0.176207	-4.68983	-1.17365	-0.994716	-1.63562	2.01293	8.48907	1.66254
AT3G49530	NAC062	NAC	3.84523	-11.174	6.7232	-0.427359	-0.339064	0.330109	-1.19531	0.691216	7.84776	0.829593
AT3G61910	NAC066	NAC	9.94031	-8.36693	-0.758251	-6.065	2.26261	-1.30424	-2.25051	-0.359619	8.15034	1.94358
AT4G28500	NAC073	NAC	11.2571	-9.7931	-1.84274	-6.1531	0.948566	0.596242	-1.49661	-0.191741	9.18726	1.08424
AT5G04410	NAC078	NAC	14.4067	-4.17129	-6.08471	-9.25529	1.11871	-3.05979	-4.79269	2.03308	10.6634	3.27582
AT5G07680	NAC079	NAC	12.0666	-10.4217	0.441615	-5.01321	1.14292	-0.253016	-2.18384	0.0415042	9.616	1.38432
AT5G13180	NAC083	NAC	12.4525	-11.3808	1.25907	-4.20722	0.383378	-1.90461	-3.97938	1.69379	10.0498	2.50705
AT5G53950	NAC098	NAC	15.5482	-11.6524	-3.50291	-5.7972	0.667992	-1.37204	-2.97532	1.01211	11.7771	1.86432
AT5G62380	NAC101	NAC	9.39139	-16.0233	4.56122	-0.828253	0.15196	-0.482607	-3.6967	1.50149	11.0202	2.20462
AT5G66300	NAC105	NAC	9.67976	-11.3857	2.54124	-1.73406	0.440608	0.566962	-2.26826	0.44754	8.80519	1.37787
AT4G01540	NAC68	NAC	7.56641	-12.8048	3.85557	-0.903838	-0.342828	1.52154	-0.295742	-0.00259429	8.8617	0.880589
AT4G01550	NAC69	NAC	11.7556	-8.45034	-0.221276	-7.8021	0.731257	0.453693	-1.61422	-0.171921	9.39786	1.0465
AT5G39610	NAC92	NAC	14.1819	-6.63568	-4.31173	-8.75449	0.639892	-0.101592	-2.0793	0.550411	10.532	1.26503
AT2G27300	NTL8	NAC	0.905949	-8.75499	6.01878	1.34206	-0.945201	1.27448	-0.962508	0.693473	6.20317	1.1437
AT4G35580	NTL9	NAC	-4.34062	-15.8943	9.40007	12.9542	-2.48212	-0.0701003	-2.13435	2.46439	13.2479	2.27743
AT1G79580	SMB	NAC	9.74875	-11.6297	3.89888	-0.948696	0.983082	-0.795148	-4.3957	1.09882	9.05728	2.56333
AT2G38880	NF-YB1	NF-YB	16.614	-6.62758	-8.78775	-9.27976	-0.682994	1.73617	0.924048	-0.167126	12.4761	1.08681
AT1G09030	NFYB4	NF-YB	-2.93154	-0.73279	3.49514	1.80578	-2.02907	1.6499	0.776413	0.734833	2.82478	1.59809
AT1G20640	NLP4	Nin-like	-2.42831	-12.6667	8.27542	5.72932	-1.84235	2.40894	1.58324	0.226324	9.44022	1.85684
AT4G24020	NLP7	Nin-like	-5.31866	-3.58733	9.10306	3.42344	-1.39938	-1.11066	-1.23961	1.91858	6.64494	1.58863
AT1G74480	RKD2	Nin-like	-12.8987	-3.87403	16.4712	9.79195	-0.260814	1.66331	-0.102801	-0.19576	13.242	0.927152
AT3G25730	ARF14	RAV	9.84073	-0.181144	-6.34562	-6.2294	-1.25555	2.0611	-0.885865	0.646809	7.61183	1.52178
AT1G25560	TEM1	RAV	9.77461	-5.08133	-4.25051	-5.24869	-1.06539	-0.570996	-1.89879	1.90221	7.3304	1.63486
AT1G68840	RAV2	RAV	8.77177	-5.21118	-3.05956	-4.46531	-2.36499	-2.19677	-2.17288	3.21718	6.56941	2.73237
AT1G13260	RAV1	RAV	4.71911	-5.66914	-0.887097	-1.30046	-1.0552	0.411286	-0.368318	0.65781	4.25935	0.778798
AT2G33810	SPL3	SBP	20.5464	-13.3938	-11.1343	-4.21908	0.744778	-0.735667	-3.23866	0.907592	15.5618	1.92013
AT3G60030	SPL12	SBP	19.8385	-13.3205	-11.5558	-6.1316	1.00165	-1.18044	-3.356	0.838907	15.3942	2.04502
AT2G42200	SPL9	SBP	15.123	-10.4554	-8.7159	-3.60379	2.06532	-2.62857	-3.50292	0.839827	11.7237	2.68007
AT5G18830	SPL7	SBP	14.6247	-11.3433	-6.34875	-6.99036	1.58873	0.27795	-0.560098	-0.980971	11.6395	1.13297
AT1G20980	SPL14	SBP	14.8196	-10.7857	-5.93664	-0.550977	1.73401	-1.30414	-3.66259	0.622239	11.1055	2.36683
AT3G57920	SPL15	SBP	12.2681	-12.253	-8.41301	-0.638828	1.51618	-1.35298	-3.80018	0.748893	10.823	2.38372
AT3G15270	SPL5	SBP	12.4111	-12.614	-6.60884	0.612674	1.73667	-1.34287	-3.30669	0.387078	10.764	2.18391
AT5G50570	SPL13A	SBP	11.4541	-12.4382	-6.10193	-0.102881	1.8061	-1.4565	-3.64123	0.571725	10.169	2.38882
AT1G27360	SPL11	SBP	13.7907	-7.53076	-6.68592	-3.29326	-3.15743	-0.888421	-2.1496	3.38441	9.98304	2.87855
AT1G53160	SPL4	SBP	12.1676	-9.07082	-6.1551	-2.71835	1.35311	-0.623397	-2.64074	0.218099	9.4386	1.68563
AT2G47070	SPL1	SBP	8.64888	-8.92778	-1.80031	-1.40773	0.76548	0.441347	-1.37477	-0.119719	7.22706	0.942407
AT1G02065	SPL8	SBP	5.42297	-1.01621	-4.09634	-4.14991	-1.25831	-0.0821035	-1.36193	1.50236	4.50028	1.33442
AT3G51060	SRS1	SRS	-12.095	0.631	7.6547	8.76701	-2.70363	0.801075	0.844607	1.48067	9.59163	1.89846
AT1G19790	SRS7	SRS	-18.3114	2.14662	12.2276	13.4026	-2.49631	1.13317	2.25375	0.749464	14.6818	2.03996
AT3G15030	TCP4	TCP	4.27449	5.0614	-13.1964	-1.30832	4.81803	1.73169	-2.16435	-3.22069	8.42748	3.6937
AT5G60970	TCP5	TCP	3.49247	5.38282	-11.3317	-1.87817	2.91213	0.855403	-0.88744	-2.09845	7.49241	2.17949
AT5G23280	TCP7	TCP	-2.91234	0.595681	-6.06858	7.63203	4.98106	2.71067	-1.51748	-3.80999	5.88134	3.98246
AT3G45150	TCP16	TCP	2.20611	1.82975	-9.47825	1.80088	7.48821	2.54161	-1.57439	-4.99811	5.7149	5.38531
AT1G72010	TCP22	TCP	-2.95005	0.672593	-5.59577	7.31797	5.60254	2.37263	-1.33922	-3.98269	5.59593	4.19973
AT5G08330	TCP21	TCP	-2.23773	0.140971	-5.16084	7.1502	7.8121	3.52338	-1.00295	-5.50957	5.25306	5.74425
AT1G69690	TCP15	TCP	-3.21906	1.33651	-4.50992	6.9408	6.79227	3.75977	-0.326765	-5.53799	5.18291	5.34023
AT1G35560	TCP23	TCP	-2.32458	0.178973	-4.88874	6.52874	5.08405	5.91519	-0.272097	-5.03645	4.89544	5.10493
AT2G45680	TCP9	TCP	-2.45432	-1.74954	-3.37017	7.03145	5.51824	2.83633	-1.37169	-4.23453	4.82391	4.33667
AT1G67260	TCP1	TCP	-2.65929	-4.80167	2.19261	5.39957	5.30606	4.13336	-0.890722	-4.23443	4.62192	4.44633
AT1G30210	TCP24	TCP	2.14008	2.08096	-7.19021	0.225202	4.33149	0.406539	-1.42148	-2.72228	4.42635	3.06976
AT3G47620	TCP14	TCP	-0.421069	-2.77275	-4.22123	5.4292	5.6448	3.19661	-1.45982	-4.0624	4.24949	4.39553
AT1G53230	TCP3	TCP	0.367959	2.85511	-6.24658	1.77341	5.17047	1.7671	-1.5082	-3.64557	4.08498	3.85684
AT3G27010	TCP20	TCP	-1.85748	-1.31159	-3.30776	5.78191	6.11856	2.44406	-2.13664	-4.01111	4.0588	4.56824
AT3G02150	TCP13	TCP	-0.485816	2.18396	-5.58145	2.92025	5.05094	2.29003	-1.14205	-3.61457	3.84943	3.80596
AT5G08070	TCP17	TCP	-1.93187	2.29614	-4.30729	4.01743	4.60072	3.02562	-0.286722	-3.6554	3.81643	3.66841
AT5G51910	TCP19	TCP	-2.42605	-0.109931	-3.06824	5.28811	6.03168	4.07233	-0.535739	-5.43606	3.79697	5.11645
AT4G18390	TCP2	TCP	-2.10519	-1.47026	-0.576241	4.10526	3.70327	3.83758	-0.301744	-3.95023	2.81532	3.71629
AT5G05550	AT5G05550	Trihelix	-24.6728	-5.78219	24.111	18.1417	2.13351	4.50272	3.88326	-4.58974	22.4933	4.17058
AT5G01380	GT-3A	Trihelix	16.1654	2.8059	-16.8911	-11.4672	7.27826	-3.98636	-6.21897	-2.23141	14.8769	5.94044
AT3G14180	ASIL2	Trihelix	-12.8602	-7.54475	17.6495	11.3071	0.640832	3.65237	3.80844	-3.2902	14.6445	3.3313
AT3G58630	AT3G58630	Trihelix	-11.2746	-10.1834	16.7706	11.5291	0.195432	3.68576	4.20326	-2.81889	14.5291	3.28152
AT1G33240	AT-GTL1	Trihelix	-6.66668	-13.228	10.3007	12.7591	-6.82882	-1.88011	-0.87697	5.53873	12.7256	5.08328
AT1G76880	AT1G76880	Trihelix	-6.51448	-11.9054	9.44644	12.276	-7.1812	-1.53019	-1.31813	5.74358	11.8516	5.29292
AT1G76890	GT-2	Trihelix	-4.50085	-13.7638	8.14722	11.779	-5.4152	-1.03218	-0.927461	5.21224	11.7492	4.36838
AT5G47660	AT5G47660	Trihelix	-4.41481	-9.99074	7.48383	9.94592	-5.80301	-1.23199	-0.70076	5.01668	9.521	4.4348
AT1G76870	AT1G76870	Trihelix	-3.15575	-8.22376	9.39065	4.98128	-0.952881	6.18391	5.4791	-3.82602	7.92355	4.89762
AT1G13450	GT-1	Trihelix	-1.73811	-10.4084	5.36626	5.8845	-1.55937	2.19554	1.8995	-0.278675	7.62846	1.79484
AT5G28300	AT5G28300	Trihelix	3.70683	-9.65394	0.612366	3.68386	-4.40589	1.07259	1.01171	2.79746	6.32992	3.1281
AT3G25990	GT-4	Trihelix	3.10968	-9.19142	2.30555	2.44532	-1.68148	1.76067	1.13046	0.28705	5.91621	1.49751
AT3G10030	AT3G10030	Trihelix	4.6099	-1.46803	-0.496583	-4.30321	0.190705	2.60006	2.41295	-1.84679	3.71857	2.0986
AT2G33550	ASR3	Trihelix	-3.47981	-1.34142	4.19176	2.62192	-1.1403	2.05478	1.86868	-0.293684	3.52899	1.58653
AT2G42400	VOZ2	VOZ	6.05199	-6.54368	1.0281	-3.88591	0.364833	0.322865	-0.594436	-0.11805	5.56174	0.448881
AT3G03660	WOX11	WOX	-6.02442	-31.0401	9.97083	28.2494	-1.80079	-0.385008	-0.210514	1.52798	25.1455	1.36402
AT4G35550	WOX13	WOX	9.63844	-9.99428	-4.37667	-1.39094	2.51964	2.32057	0.993583	-3.08141	8.25633	2.60269
AT2G17950	WUS	WOX	12.3645	-6.60907	-7.56267	-4.26368	-0.175299	3.74985	2.0716	-1.79692	9.35806	2.44325
AT5G22570	WRKY38	WRKY	13.9169	-16.006	-3.88877	-0.438541	-0.32618	0.0963483	-0.133065	0.296105	12.3139	0.270768
AT2G38470	WRKY33	WRKY	5.80932	-18.2692	0.451044	9.19952	-3.51624	-0.0684074	1.68579	2.04756	12.2525	2.5428
AT4G26640	WRKY20	WRKY	8.70308	-18.0532	0.997791	6.29141	-3.39769	-0.592083	0.981782	2.18573	12.1268	2.41296
AT2G47260	WRKY23	WRKY	8.16118	-17.1093	1.13931	7.6507	-2.49658	-1.38483	-0.0620017	1.9353	11.8203	1.90541
AT1G29280	WRKY65	WRKY	7.21163	-18.1013	0.607708	6.15294	-3.17732	0.0161725	1.20406	1.80299	11.7421	2.22038
AT2G03340	WRKY3	WRKY	6.69171	-17.83	-0.0921202	7.24921	-3.44513	0.0171539	1.475	1.88773	11.7087	2.42262
AT1G69310	WRKY57	WRKY	10.2941	-17.4706	-1.40709	1.55188	-1.74541	-1.14173	-0.529221	1.74795	11.5934	1.52638
AT2G30590	WRKY21	WRKY	3.77825	-17.8784	2.90178	7.77376	-4.0758	0.0997589	1.69223	2.05811	11.5446	2.81122
AT2G30250	WRKY25	WRKY	9.11025	-16.5855	-0.568908	6.28797	-3.01065	-0.423071	0.830996	1.87886	11.506	2.10813
AT4G23550	WRKY29	WRKY	4.41752	-17.2345	2.09827	8.53276	-4.03443	-0.204303	0.994522	2.39633	11.4391	2.76105
AT4G01720	WRKY47	WRKY	8.50173	-17.7032	-0.0548282	2.95325	-2.00524	-0.118405	1.44269	0.816238	11.3207	1.50311
AT1G30650	WRKY14	WRKY	5.63597	-16.7556	1.68232	8.06228	-3.96822	-0.264731	1.23198	2.26008	11.2527	2.72674
AT5G13080	WRKY75	WRKY	6.2437	-17.641	1.82584	5.36674	-3.3563	-0.197373	2.22434	1.69149	11.2236	2.52189
AT5G24110	WRKY30	WRKY	6.07529	-16.5468	1.36219	7.94071	-2.71996	-1.28543	0.261049	2.20977	11.1844	2.11448
AT2G23320	WRKY15	WRKY	5.67118	-16.2318	2.2614	8.37573	-4.26208	-0.647277	1.32179	2.60769	11.119	2.99396
AT5G41570	WRKY24	WRKY	7.56654	-16.3044	0.0185994	6.81315	-3.28616	0.278741	2.12535	1.48472	11.0845	2.41573
AT3G56400	WRKY70	WRKY	6.77118	-16.3499	0.649043	7.40556	-3.01246	-1.28949	0.688701	2.12197	11.0732	2.24787
AT2G40740	WRKY55	WRKY	7.29068	-15.3911	0.654739	8.20092	-2.73629	-1.05739	0.461657	1.98289	10.9176	2.02446
AT5G07100	WRKY26	WRKY	7.32229	-16.8944	-0.491917	4.50321	-3.53571	0.0140903	1.49106	2.00211	10.8294	2.49886
AT5G01900	WRKY62	WRKY	9.06916	-14.9716	-3.44997	5.74654	-2.82568	-1.46655	-0.551445	2.59778	10.7714	2.30411
AT4G04450	WRKY42	WRKY	8.92635	-16.103	-1.28288	3.47703	-2.18839	-0.296309	1.41735	1.1218	10.7473	1.64757
AT4G01250	WRKY22	WRKY	4.31794	-16.451	1.72767	6.80027	-4.68727	-0.60455	1.34921	3.11354	10.5713	3.35055
AT4G31550	WRKY11	WRKY	6.29664	-15.6423	2.04033	6.72388	-4.09985	-0.453813	1.34498	2.42797	10.5454	2.8616
AT2G46130	WRKY43	WRKY	9.58837	-15.4515	-0.538905	2.01243	-3.37401	1.43492	2.32941	1.02536	10.4914	2.54424
AT1G29860	WRKY71	WRKY	3.92339	-16.26	2.83765	6.33907	-4.55317	0.068939	1.74701	2.32393	10.4166	3.11695
AT2G25000	WRKY60	WRKY	8.40148	-15.6545	0.181035	3.26584	-2.04558	-1.13523	0.0718989	1.82647	10.3718	1.67363
AT1G62300	WRKY6	WRKY	6.25777	-15.1866	1.94665	5.30401	-2.69614	-0.493882	1.3324	1.62594	10.0168	1.99321
AT2G44745	WRKY12	WRKY	10.3557	-13.6513	-2.94088	1.19908	-1.25888	0.142386	0.457696	0.717052	9.95557	0.880883
AT4G18170	WRKY28	WRKY	6.82265	-14.9513	1.43236	4.95692	-4.05627	-0.790063	1.28982	2.64092	9.93236	2.91582
AT2G46400	WRKY46	WRKY	10.3474	-13.6741	-2.30103	-0.0680597	-2.02637	1.27217	2.82713	-0.0618744	9.85287	2.05832
AT2G21900	WRKY59	WRKY	7.95383	-14.7648	0.352772	3.18401	-3.43154	-0.103478	1.22443	1.98827	9.8123	2.39532
AT5G56270	WRKY2	WRKY	10.5851	-12.595	-1.00706	0.540296	-0.899639	0.439173	1.08284	0.236887	9.49477	0.825894
AT1G80840	WRKY40	WRKY	6.07448	-14.6406	1.11996	3.68179	-5.0684	-0.327004	1.54229	2.9352	9.35441	3.49185
AT4G22070	WRKY31	WRKY	6.01236	-13.5158	1.90365	4.95991	-2.34658	-0.381552	0.779143	1.41929	9.07282	1.65361
AT1G66600	WRKY63	WRKY	8.44099	-12.8975	-0.0868841	2.42684	-0.643082	-0.122219	-1.11415	1.01363	8.9884	0.914669
AT2G04880	WRKY1	WRKY	4.7981	-13.5078	2.96122	3.21829	-3.50705	-0.0771973	1.91395	1.74853	8.62183	2.51823
AT2G24570	WRKY17	WRKY	6.9308	-13.0136	0.241449	0.6864	-3.75302	1.14712	2.02747	1.44257	8.39198	2.6712
AT4G31800	WRKY18	WRKY	7.25473	-11.6742	-0.220311	2.64748	-3.70639	-0.27619	0.932709	2.24591	8.06194	2.55383
AT5G46350	WRKY8	WRKY	1.86878	-11.2781	4.24654	5.1623	-3.50094	-0.533074	1.0927	2.35237	7.64568	2.52861
AT4G24240	WRKY7	WRKY	3.36637	-11.9345	2.68667	3.75138	-3.58785	1.06614	2.44072	1.25676	7.61406	2.65834
AT5G52830	WRKY27	WRKY	2.4617	-11.6471	2.59207	4.73813	-4.40666	-0.863307	1.14973	3.03789	7.52823	3.18443
AT3G01970	WRKY45	WRKY	1.18958	-10.9999	4.16314	5.28563	-4.34229	-0.00788941	1.30248	2.42569	7.47551	2.96306
AT5G26170	WRKY50	WRKY	0.891206	-6.88117	4.14605	1.39367	-4.70528	-0.0264305	0.974417	2.91243	4.73378	3.2349
AT1G69180	CRC	YABBY	1.93542	-14.0028	3.25311	9.31854	0.40032	3.57526	0.432545	-1.34771	9.95289	2.04977
AT2G45190	YAB1	YABBY	11.8397	-7.12285	-4.61323	-2.87064	1.04283	2.85396	0.604473	-1.82223	8.53469	1.92563
AT5G39760	ZHD10	ZF-HD	-5.79008	-27.2955	10.3555	24.7707	-0.581734	0.35699	-1.11911	0.778367	22.3484	0.864906
AT3G28920	ZHD9	ZF-HD	-4.29663	-29.0411	8.58487	23.408	-0.974149	0.574929	-0.639467	0.844735	22.2338	0.893047
AT5G65410	ZHD1	ZF-HD	-4.07622	-24.1485	9.57642	26.6561	-0.38791	-0.612658	-1.29001	0.888197	21.4941	0.910527
AT2G18350	ZHD6	ZF-HD	-2.12946	-24.0447	7.55845	22.2322	-2.43189	-0.170514	-0.561856	1.94857	19.4149	1.79688
AT1G75240	ZHD5	ZF-HD	-2.16504	-21.801	6.90205	21.4936	-1.5595	-0.135824	0.384968	1.00292	18.117	1.09254
AT1G14687	ZHD14	ZF-HD	7.99703	-8.63698	-0.660976	-1.76071	1.06109	0.591774	-1.02805	-0.456111	6.82504	0.954625
AT2G02540	ZHD3	ZF-HD	6.71635	-5.88475	-2.97948	-0.267002	1.31815	-0.50363	-0.12493	-0.807544	5.39229	0.940817

## Sheet: Table S23
Table S23. Over-representation analysis of DEGs with similar and distinct expression in wheat RNA clusters.
type	wheat.cluster	GeneRatio	BgRatio	p.adjust	qvalue	Count
RNA.similar	C1	2436/5715	8832/34052	5.08957e-201	3.57163e-201	2436
RNA.similar	C6	1162/5715	5334/34052	7.94102e-25	5.57264e-25	1162
RNA.similar	C2	354/5715	2669/34052	1	0.701754	354
RNA.similar	C3	564/5715	5200/34052	1	0.701754	564
RNA.similar	C4	634/5715	5723/34052	1	0.701754	634
RNA.similar	C5	565/5715	6294/34052	1	0.701754	565
RNA.distinct	C5	2607/9464	6294/34052	7.90024e-148	4.15802e-148	2607
RNA.distinct	C2	863/9464	2669/34052	1.24899e-07	6.57365e-08	863
RNA.distinct	C3	1528/9464	5200/34052	0.0058551	0.00308163	1528
RNA.distinct	C4	1557/9464	5723/34052	1	0.526316	1557
RNA.distinct	C1	1806/9464	8832/34052	1	0.526316	1806
RNA.distinct	C6	1103/9464	5334/34052	1	0.526316	1103

## Sheet: Table S24
Table S24. Transcription factor family enrichment analysis of different types of DEGs
Family	GeneRatio	BgRatio	Fold.Enrichment	pvalue	p.adjust	qvalue	geneID	Count	gene.group
ERF	64/285	514/5884	2.57066	3.65e-13	9.86e-12	7.69e-12	TraesCS1A02G218100/TraesCS1A02G220000/TraesCS1A02G221900/TraesCS1A02G231200/TraesCS1A02G263100/TraesCS1A02G314300/TraesCS1B02G231500/TraesCS1B02G233300/TraesCS1B02G235100/TraesCS1B02G273700/TraesCS1B02G326600/TraesCS1B02G389700/TraesCS1B02G389900/TraesCS1D02G221500/TraesCS1D02G223600/TraesCS1D02G263200/TraesCS1D02G314800/TraesCS1D02G376500/TraesCS1D02G376600/TraesCS1D02G376800/TraesCS2A02G415100/…	64	rna.similar.C1
CAMTA	9/285	18/5884	10.3228	4.29e-08	5.78e-07	4.51e-07	TraesCS2A02G163000/TraesCS2A02G283800/TraesCS2B02G188800/TraesCS2B02G254100/TraesCS2B02G300800/TraesCS2D02G169900/TraesCS3A02G433300/TraesCS4B02G306300/TraesCS4D02G304500	9	rna.similar.C1
HSF	16/285	78/5884	4.235	6.82e-07	6.14e-06	4.79e-06	TraesCS1A02G375600/TraesCS1B02G396000/TraesCS1D02G382900/TraesCS2A02G089300/TraesCS2A02G401600/TraesCS2B02G105100/TraesCS2B02G419600/TraesCS2D02G399000/TraesCS4A02G062800/TraesCS4B02G239700/TraesCS4B02G278100/TraesCS4D02G239600/TraesCS4D02G276500/TraesCS5A02G437900/TraesCS5B02G440700/TraesCS5D02G445100	16	rna.similar.C1
NF-YA	6/285	19/5884	6.51967	0.000194632	0.00131376	0.00102438	TraesCS2A02G172500/TraesCS2B02G198700/TraesCS2D02G179600/TraesCS6A02G335400/TraesCS6B02G366100/TraesCS6D02G315300	6	rna.similar.C1
WRKY	28/285	296/5884	1.95296	0.000450471	0.00243254	0.00189672	TraesCS1A02G410500/TraesCS1A02G410700/TraesCS1B02G440600/TraesCS1D02G418400/TraesCS1D02G418500/TraesCS3A02G347500/TraesCS3B02G324400/TraesCS3B02G379200/TraesCS3D02G289500/TraesCS3D02G341100/TraesCS5A02G185600/TraesCS5A02G185700/TraesCS5B02G183700/TraesCS5B02G183800/TraesCS5B02G224100/TraesCS5D02G190700/TraesCS5D02G232800/TraesCS5D02G232900/TraesCS6A02G146900/TraesCS6B02G175100/TraesCS6D02G136200/…	28	rna.similar.C1
GRAS	19/285	181/5884	2.16722	0.00111677	0.00502545	0.00391848	TraesCS2A02G189600/TraesCS2A02G214400/TraesCS2B02G217500/TraesCS2B02G239400/TraesCS2D02G198200/TraesCS2D02G220200/TraesCS3A02G360300/TraesCS3A02G408000/TraesCS3B02G441600/TraesCS3D02G354100/TraesCS3D02G403100/TraesCS4A02G039000/TraesCS4A02G176300/TraesCS4B02G141500/TraesCS4B02G266700/TraesCS4D02G135500/TraesCS4D02G266400/TraesCS5A02G080300/TraesCS7B02G078300	19	rna.similar.C1
ZF-HD	5/285	37/5884	2.78995	0.0314809	0.121426	0.0946794	TraesCS2D02G303900/TraesCS5A02G227100/TraesCS5B02G225700/TraesCS5D02G234600/TraesCS6A02G273700	5	rna.similar.C1
Trihelix	8/285	91/5884	1.815	0.0725902	0.244992	0.191027	TraesCS2A02G389200/TraesCS2B02G407400/TraesCS2D02G387100/TraesCS4B02G112700/TraesCS4D02G110200/TraesCS5A02G558200/TraesCS6D02G222500/TraesCSU02G029700	8	rna.similar.C1
Dof	8/285	100/5884	1.65165	0.110455	0.308438	0.240497	TraesCS1A02G035200/TraesCS1B02G045000/TraesCS1D02G036700/TraesCS2A02G590700/TraesCS2A02G590800/TraesCS2B02G592900/TraesCS2D02G563200/TraesCS2D02G563400	8	rna.similar.C1
bZIP	18/285	274/5884	1.35628	0.114236	0.308438	0.240497	TraesCS1A02G072600/TraesCS1B02G282800/TraesCS3A02G131900/TraesCS3A02G293700/TraesCS3A02G378700/TraesCS3B02G411300/TraesCS3D02G371900/TraesCS4A02G209900/TraesCS5A02G057500/TraesCS5A02G265600/TraesCS5B02G059200/TraesCS5B02G265300/TraesCS5B02G444100/TraesCS5D02G068800/TraesCS5D02G273500/TraesCS5D02G447500/TraesCS6A02G154600/TraesCS7A02G488600	18	rna.similar.C1
NF-YB	5/285	57/5884	1.81102	0.140532	0.344943	0.268962	TraesCS1A02G411700/TraesCS1B02G442000/TraesCS1D02G419500/TraesCS2A02G173500/TraesCS2D02G180700	5	rna.similar.C1
GRF	3/285	30/5884	2.06456	0.175633	0.395174	0.308128	TraesCS2A02G398300/TraesCS2B02G416300/TraesCS2D02G395900	3	rna.similar.C1
HD-ZIP	8/285	124/5884	1.33198	0.251824	0.52302	0.407812	TraesCS4A02G016600/TraesCS4B02G287600/TraesCS4D02G286400/TraesCS5A02G232700/TraesCS5B02G231300/TraesCS5D02G235300/TraesCS6B02G284300/TraesCS6D02G222600	8	rna.similar.C1
DBB	2/285	26/5884	1.58812	0.361149	0.671619	0.523679	TraesCS3D02G139600/TraesCS6D02G199200	2	rna.similar.C1
CO-like	3/285	45/5884	1.37637	0.373122	0.671619	0.523679	TraesCS6A02G286400/TraesCS6B02G315400/TraesCS6D02G267100	3	rna.similar.C1
MYB_related	10/285	228/5884	0.905509	0.674017	0.999995	0.779723	TraesCS6D02G239800/TraesCS7A02G017600/TraesCS7A02G470700/TraesCS7A02G553800/TraesCS7B02G372500/TraesCS7B02G478200/TraesCS7D02G014900/TraesCS7D02G032700/TraesCS7D02G458000/TraesCS7D02G540700	10	rna.similar.C1
GATA	3/285	79/5884	0.784011	0.744508	0.999995	0.779723	TraesCS6A02G374600/TraesCS6B02G412300/TraesCS6D02G358700	3	rna.similar.C1
C3H	5/285	128/5884	0.806469	0.750617	0.999995	0.779723	TraesCS1A02G069600/TraesCS1D02G072200/TraesCS3A02G423200/TraesCS3B02G458800/TraesCS3D02G418400	5	rna.similar.C1
ARF	2/285	67/5884	0.616287	0.84317	0.999995	0.779723	TraesCS1A02G334900/TraesCS3D02G166700	2	rna.similar.C1
MYB	17/285	433/5884	0.810567	0.851839	0.999995	0.779723	TraesCS1A02G076200/TraesCS2A02G157600/TraesCS2B02G183100/TraesCS2D02G163700/TraesCS3A02G418100/TraesCS3B02G453300/TraesCS3D02G413700/TraesCS5A02G079100/TraesCS5B02G226100/TraesCS5D02G335700/TraesCS6A02G294000/TraesCS6B02G324600/TraesCS6D02G274900/TraesCS7A02G205100/TraesCS7A02G526500/TraesCS7B02G112400/TraesCS7D02G208000	17	rna.similar.C1
G2-like	4/285	148/5884	0.55799	0.933805	0.999995	0.779723	TraesCS5A02G068900/TraesCS5B02G075300/TraesCS5D02G081000/TraesCS6D02G145300	4	rna.similar.C1
TCP	1/285	60/5884	0.344094	0.949931	0.999995	0.779723	TraesCS1A02G332600	1	rna.similar.C1
MIKC_MADS	3/285	127/5884	0.487692	0.950236	0.999995	0.779723	TraesCS6A02G313800/TraesCS6B02G343900/TraesCS6D02G293200	3	rna.similar.C1
TALE	1/285	65/5884	0.317625	0.961043	0.999995	0.779723	TraesCS2B02G268200	1	rna.similar.C1
bHLH	18/285	531/5884	0.699851	0.964565	0.999995	0.779723	TraesCS1A02G083000/TraesCS1A02G193200/TraesCS1B02G100400/TraesCS1B02G208000/TraesCS1D02G084200/TraesCS1D02G196900/TraesCS3A02G158600/TraesCS3A02G252900/TraesCS3B02G185400/TraesCS3B02G284800/TraesCS3B02G288700/TraesCS3D02G166300/TraesCS3D02G253700/TraesCS5A02G251390/TraesCS5A02G376500/TraesCS5B02G264300/TraesCS5D02G386500/TraesCS6A02G358400	18	rna.similar.C1
C2H2	11/285	398/5884	0.570607	0.988286	0.999995	0.779723	TraesCS2B02G226000/TraesCS2D02G206400/TraesCS5A02G401200/TraesCS5B02G232200/TraesCS5B02G358600/TraesCS5B02G406000/TraesCS5D02G411400/TraesCS6D02G235800/TraesCS7A02G160700/TraesCS7B02G065700/TraesCS7D02G161800	11	rna.similar.C1
NAC	6/285	460/5884	0.269291	0.999995	0.999995	0.779723	TraesCS3A02G406000/TraesCS3B02G439600/TraesCS3D02G401200/TraesCS7A02G299600/TraesCS7B02G187600/TraesCS7D02G295100	6	rna.similar.C1
E2F/DP	9/35	27/5884	56.0381	1.33e-14	2e-13	1.54e-13	TraesCS2A02G031800/TraesCS2A02G297400/TraesCS2B02G043500/TraesCS2B02G313600/TraesCS2D02G031400/TraesCS2D02G295300/TraesCS5D02G133600/TraesCS6A02G195500/TraesCS6B02G233700	9	rna.similar.C6
AP2	3/35	73/5884	6.90881	0.00902276	0.0510772	0.039428	TraesCS4A02G123800/TraesCS4B02G180600/TraesCS4D02G182100	3	rna.similar.C6
RAV	2/35	26/5884	12.9319	0.0102154	0.0510772	0.039428	TraesCS1B02G392000/TraesCS1D02G378900	2	rna.similar.C6
Nin-like	2/35	36/5884	9.33968	0.0190811	0.071554	0.0552347	TraesCS4B02G325500/TraesCS5A02G497800	2	rna.similar.C6
SRS	1/35	15/5884	11.2076	0.0857017	0.253469	0.19566	TraesCS5A02G319200	1	rna.similar.C6
Trihelix	2/35	91/5884	3.69482	0.101388	0.253469	0.19566	TraesCS5A02G124200/TraesCS5D02G132100	2	rna.similar.C6
NF-YC	1/35	42/5884	4.00272	0.222332	0.476426	0.367768	TraesCS3D02G117200	1	rna.similar.C6
ERF	4/35	514/5884	1.30828	0.366063	0.672418	0.519059	TraesCS3A02G149000/TraesCS3D02G157100/TraesCS4B02G268100/TraesCS4D02G267500	4	rna.similar.C6
Dof	1/35	100/5884	1.68114	0.452121	0.672418	0.519059	TraesCS5B02G249800	1	rna.similar.C6
HD-ZIP	1/35	124/5884	1.35576	0.526528	0.672418	0.519059	TraesCS1A02G219200	1	rna.similar.C6
WRKY	2/35	296/5884	1.13591	0.531976	0.672418	0.519059	TraesCS3A02G228600/TraesCS3D02G226300	2	rna.similar.C6
C3H	1/35	128/5884	1.31339	0.537934	0.672418	0.519059	TraesCS7B02G363200	1	rna.similar.C6
bHLH	3/35	531/5884	0.949798	0.623724	0.71363	0.550872	TraesCS1A02G281300/TraesCS1D02G280600/TraesCS4A02G200700	3	rna.similar.C6
GRAS	1/35	181/5884	0.928808	0.666055	0.71363	0.550872	TraesCS5B02G143100	1	rna.similar.C6
NAC	2/35	460/5884	0.730932	0.771149	0.771149	0.595273	TraesCS1A02G266300/TraesCS6B02G033000	2	rna.similar.C6
G2-like	14/133	148/5884	4.18492	5.11e-06	0.000122756	0.00010768	TraesCS2A02G100600/TraesCS2B02G117800/TraesCS2D02G100100/TraesCS3A02G123700/TraesCS5A02G401600/TraesCS5B02G201900/TraesCS5B02G406300/TraesCS5D02G209600/TraesCS6A02G155400/TraesCS6A02G269000/TraesCS6B02G183500/TraesCS7A02G483100/TraesCS7B02G385700/TraesCS7D02G470000	14	rna.distinct.C5
Dof	11/133	100/5884	4.86647	1.33e-05	0.000159394	0.000139819	TraesCS2A02G591000/TraesCS2A02G591100/TraesCS2A02G591200/TraesCS2B02G592600/TraesCS2D02G563000/TraesCS2D02G563100/TraesCS4D02G285100/TraesCS5A02G251800/TraesCS5B02G087600/TraesCS5D02G093800/TraesCS6B02G317100	11	rna.distinct.C5
ERF	21/133	514/5884	1.8075	0.00527414	0.0421931	0.0370115	TraesCS1A02G272300/TraesCS1D02G244500/TraesCS1D02G272600/TraesCS1D02G418900/TraesCS3A02G379900/TraesCS3B02G412500/TraesCS4A02G088400/TraesCS5A02G180800/TraesCS5A02G310500/TraesCS5B02G178600/TraesCS5B02G311900/TraesCS5D02G185300/TraesCS6A02G301900/TraesCS6A02G343300/TraesCS6B02G281000/TraesCS6B02G331000/TraesCS6B02G375400/TraesCS7A02G057800/TraesCS7A02G158000/TraesCS7B02G062200/TraesCS7D02G158500	21	rna.distinct.C5
Trihelix	6/133	91/5884	2.91696	0.0165538	0.0993228	0.0871253	TraesCS1A02G176700/TraesCS1B02G203300/TraesCS1D02G162400/TraesCS2B02G363200/TraesCS6A02G240200/TraesCS6B02G284400	6	rna.distinct.C5
NF-YA	2/133	19/5884	4.65691	0.0674997	0.323999	0.284209	TraesCS5A02G043300/TraesCS5D02G052200	2	rna.distinct.C5
GRF	2/133	30/5884	2.94937	0.146631	0.531347	0.466094	TraesCS4D02G059600/TraesCS6B02G267500	2	rna.distinct.C5
NAC	14/133	460/5884	1.34645	0.154976	0.531347	0.466094	TraesCS1A02G263700/TraesCS1B02G274300/TraesCS1D02G194200/TraesCS1D02G263800/TraesCS2A02G306800/TraesCS2D02G305300/TraesCS4A02G219700/TraesCS4B02G320300/TraesCS4D02G094400/TraesCS4D02G316800/TraesCS5A02G491700/TraesCS5B02G104200/TraesCS5D02G111300/TraesCS7B02G472600	14	rna.distinct.C5
LSD	1/133	13/5884	3.40312	0.257347	0.726214	0.63703	TraesCS5A02G376200	1	rna.distinct.C5
MYB	12/133	433/5884	1.22607	0.27233	0.726214	0.63703	TraesCS1B02G055200/TraesCS2A02G445500/TraesCS2D02G444200/TraesCS2D02G444300/TraesCS3B02G367500/TraesCS3B02G397100/TraesCS5A02G087100/TraesCS5B02G089200/TraesCS5B02G093000/TraesCS5B02G330100/TraesCS5D02G099100/TraesCS5D02G210900	12	rna.distinct.C5
LBD	3/133	90/5884	1.47469	0.33273	0.798552	0.700484	TraesCS4A02G297500/TraesCS4B02G016200/TraesCS4D02G014600	3	rna.distinct.C5
YABBY	1/133	21/5884	2.1067	0.381805	0.833029	0.730727	TraesCS1D02G162600	1	rna.distinct.C5
bZIP	7/133	274/5884	1.13023	0.425719	0.843013	0.739485	TraesCS1A02G409800/TraesCS1B02G439800/TraesCS3B02G404600/TraesCS3D02G364900/TraesCS5B02G142200/TraesCS6B02G182500/TraesCS6D02G144400	7	rna.distinct.C5
WRKY	7/133	296/5884	1.04623	0.507187	0.843013	0.739485	TraesCS1A02G401800/TraesCS1A02G421900/TraesCS1B02G374900/TraesCS1B02G440500/TraesCS2B02G289000/TraesCS2D02G269200/TraesCS7B02G136400	7	rna.distinct.C5
HSF	2/133	78/5884	1.13437	0.530242	0.843013	0.739485	TraesCS5A02G237900/TraesCS5D02G244800	2	rna.distinct.C5
HD-ZIP	3/133	124/5884	1.07034	0.535418	0.843013	0.739485	TraesCS2B02G407600/TraesCS6B02G321100/TraesCS6D02G272000	3	rna.distinct.C5
Nin-like	1/133	36/5884	1.22891	0.562009	0.843013	0.739485	TraesCS4D02G322400	1	rna.distinct.C5
TCP	1/133	60/5884	0.737343	0.748116	0.929734	0.815556	TraesCS1B02G346300	1	rna.distinct.C5
GRAS	3/133	181/5884	0.73327	0.782834	0.929734	0.815556	TraesCS1A02G209400/TraesCS1D02G212800/TraesCS4B02G367300	3	rna.distinct.C5
ARF	1/133	67/5884	0.660307	0.785743	0.929734	0.815556	TraesCS3B02G190100	1	rna.distinct.C5
C3H	2/133	128/5884	0.691259	0.791092	0.929734	0.815556	TraesCS1A02G414300/TraesCS1B02G444500	2	rna.distinct.C5
AP2	1/133	73/5884	0.606036	0.813518	0.929734	0.815556	TraesCS5A02G141700	1	rna.distinct.C5
bHLH	9/133	531/5884	0.749841	0.860272	0.938479	0.823227	TraesCS5A02G248200/TraesCS5A02G466300/TraesCS5B02G422000/TraesCS5B02G478000/TraesCS5D02G479100/TraesCS7A02G245800/TraesCS7A02G340300/TraesCS7A02G543300/TraesCS7D02G244300	9	rna.distinct.C5
C2H2	4/133	398/5884	0.444629	0.982616	0.987084	0.865863	TraesCS2A02G403200/TraesCS2B02G421100/TraesCS2D02G400300/TraesCS4B02G262400	4	rna.distinct.C5
B3	4/133	415/5884	0.426415	0.987084	0.987084	0.865863	TraesCS2A02G394700/TraesCS5A02G127100/TraesCS5A02G516600/TraesCS5D02G134700	4	rna.distinct.C5
NAC	18/126	113/1717	2.17067	0.000977	0.025403	0.0226261	AT1G12260/AT1G28470/AT1G33280/AT1G52880/AT1G71930/AT2G02450/AT2G24430/AT3G01600/AT3G04420/AT3G04430/AT3G18400/AT4G10350/AT4G28500/AT5G14490/AT5G18270/AT5G50820/AT5G62380/AT5G64060	18	A3
LBD	9/126	43/1717	2.85216	0.00307483	0.0399728	0.0356033	AT1G16530/AT2G40470/AT2G42430/AT2G42440/AT2G45420/AT3G03760/AT3G58190/AT4G00220/AT5G06080	9	A3
WOX	4/126	16/1717	3.40675	0.0251849	0.16843	0.150019	AT1G20700/AT1G46480/AT5G05770/AT5G17810	4	A3
MYB	17/126	142/1717	1.6314	0.0259123	0.16843	0.150019	AT1G08810/AT1G09540/AT1G17950/AT1G26780/AT1G63910/AT1G79180/AT2G31180/AT2G36890/AT3G08500/AT3G12720/AT3G48920/AT4G09460/AT4G12350/AT4G22680/AT4G33450/AT4G37780/AT5G12870	17	A3
WRKY	9/126	72/1717	1.70337	0.0758782	0.394567	0.351436	AT1G18860/AT1G55600/AT1G68150/AT1G69810/AT2G24570/AT2G47260/AT3G01970/AT4G22070/AT4G39410	9	A3
C2H2	10/126	100/1717	1.3627	0.19232	0.833389	0.742289	AT1G02030/AT1G08290/AT1G80730/AT2G28200/AT2G28710/AT3G10470/AT5G03510/AT5G04390/AT5G60470/AT5G67450	10	A3
ERF	11/126	122/1717	1.22866	0.278434	0.951267	0.847282	AT1G06160/AT1G24590/AT2G38340/AT2G40340/AT2G47520/AT4G11140/AT4G18450/AT5G11590/AT5G13330/AT5G18560/AT5G61890	11	A3
bHLH	13/126	153/1717	1.15785	0.328339	0.951267	0.847282	AT1G27740/AT1G30670/AT1G66470/AT3G07340/AT3G20640/AT3G28857/AT4G30980/AT4G33880/AT5G10570/AT5G46830/AT5G48560/AT5G65320/AT5G65640	13	A3
EIL	1/126	6/1717	2.27116	0.367445	0.951267	0.847282	AT5G65100	1	A3
GATA	3/126	30/1717	1.3627	0.379982	0.951267	0.847282	AT2G28340/AT5G26930/AT5G49300	3	A3
HSF	2/126	24/1717	1.13558	0.535836	0.951267	0.847282	AT2G26150/AT2G41690	2	A3
Trihelix	2/126	29/1717	0.939792	0.640804	0.951267	0.847282	AT2G33550/AT3G10000	2	A3
ARR-B	1/126	14/1717	0.973356	0.657417	0.951267	0.847282	AT4G31920	1	A3
MYB_related	4/126	63/1717	0.865205	0.6929	0.951267	0.847282	AT3G10590/AT4G36570/AT5G53200/AT5G58900	4	A3
C3H	3/126	50/1717	0.817619	0.724355	0.951267	0.847282	AT1G03790/AT1G66810/AT5G07500	3	A3
ZF-HD	1/126	17/1717	0.801587	0.728008	0.951267	0.847282	AT5G60480	1	A3
M-type_MADS	4/126	66/1717	0.825878	0.728068	0.951267	0.847282	AT1G17310/AT2G28700/AT4G11250/AT5G38740	4	A3
AP2	1/126	18/1717	0.757055	0.748168	0.951267	0.847282	AT4G37750	1	A3
Dof	2/126	36/1717	0.757055	0.755464	0.951267	0.847282	AT1G26790/AT1G29160	2	A3
ARF	1/126	22/1717	0.619408	0.815018	0.951267	0.847282	AT4G30080	1	A3
GeBP	1/126	22/1717	0.619408	0.815018	0.951267	0.847282	AT5G41765	1	A3
G2-like	2/126	42/1717	0.648904	0.827375	0.951267	0.847282	AT1G14600/AT3G25790	2	A3
TCP	1/126	24/1717	0.567791	0.841505	0.951267	0.847282	AT1G35560	1	A3
HD-ZIP	2/126	48/1717	0.567791	0.879811	0.953129	0.84894	AT1G70920/AT1G79840	2	A3
bZIP	3/126	74/1717	0.552445	0.920031	0.956833	0.85224	AT1G75390/AT4G34590/AT4G37730	3	A3
B3	1/126	66/1717	0.206469	0.994095	0.994095	0.885428	AT5G09780	1	A3
