# Supplementary material for: Uncovering transcriptional regulatory network during regeneration for boosting wheat transformation
Source: Research Square preprint supplement (doi:10.21203/rs.3.rs-2192210/v1), 2022-10-28
Supplement: Supplementary file 2 [file 263c7ab4edd9f2f77c0be5b4.xlsx]

## Sheet: Table S4
Table S4. Clustering of differentially peaks.
Data.type	PeakID	Cluster	DAI0	DAI3	DAI6	DAI9	Group	GeneID
ATAC	1A:100103696-100104097	ATAC.K2	3.47661	1.149	0.917538	0.757949	genic	TraesCS1A02G104300
ATAC	1A:100104186-100104367	ATAC.K2	0.442112	0.108141	0.127436	0.0488999	promoter	TraesCS1A02G104300
ATAC	1A:100104399-100104477	ATAC.K2	0.381824	0.0135176	0.0764615	0.012225	promoter	TraesCS1A02G104300
ATAC	1A:100104775-100104853	ATAC.K2	0.542592	0.297388	0.165667	0.12225	promoter	TraesCS1A02G104300
ATAC	1A:100267023-100267457	ATAC.K3	5.5264	5.43409	4.70238	1.956	promoter	TraesCS1A02G104500
ATAC	1A:100272245-100272856	ATAC.K3	2.0096	2.16282	1.74587	0.782399	genic	TraesCS1A02G104500
ATAC	1A:100418033-100418230	ATAC.K2	0.984705	0.0811058	0.203897	0.2445	genic	TraesCS1A02G105000
ATAC	1A:10057703-10058229	ATAC.K4	1.88903	2.31152	5.53071	6.93156	promoter	TraesCS1A02G020400
ATAC	1A:10058827-10059201	ATAC.K4	0.241152	0.256835	2.01349	2.22495	promoter	TraesCS1A02G020400
ATAC	1A:10060451-10060736	ATAC.K2	1.62778	0.594776	0.649922	0.684599	promoter	TraesCS1A02G020400
ATAC	1A:10065249-10066187	ATAC.K3	13.1227	17.9244	11.3928	8.28854	promoter	TraesCS1A02G020500
ATAC	1A:10132253-10132465	ATAC.K2	5.42592	1.94654	0.688153	0.757949	promoter	TraesCS1A02G020900
ATAC	1A:101335652-101335872	ATAC.K1	1.44691	4.51489	3.83582	3.85087	promoter	TraesCS1A02G105400
ATAC	1A:10135076-10135302	ATAC.K2	1.70816	0.675882	0.522487	0.537899	promoter	TraesCS1A02G021000
ATAC	1A:101381933-101382173	ATAC.K4	0.30144	0.486635	0.85382	0.855749	promoter	TraesCS1A02G105500
ATAC	1A:10150332-10150482	ATAC.K3	0.884224	0.986787	0.420538	0.26895	promoter	TraesCS1A02G021100
ATAC	1A:10150750-10150958	ATAC.K2	1.44691	0.540705	0.497	0.721274	promoter	TraesCS1A02G021100
ATAC	1A:10160719-10160840	ATAC.K2	0.5024	0.243317	0.101949	0.0977998	promoter	TraesCS1A02G021200
ATAC	1A:10172284-10172483	ATAC.K2	0.30144	0.0540705	0.101949	0.0488999	promoter	TraesCS1A02G021300
ATAC	1A:10211807-10211950	ATAC.K2	0.582784	0.0270353	0.101949	0.0488999	promoter	TraesCS1A02G021400
ATAC	1A:10212869-10212951	ATAC.K2	0.40192	0.189247	0.152923	0.0488999	promoter	TraesCS1A02G021400
ATAC	1A:102360598-102362205	ATAC.K3	21.1209	20.3981	12.0427	8.77753	genic	TraesCS1A02G105800
ATAC	1A:102362338-102362449	ATAC.K3	1.18566	1.40583	0.573461	0.440099	genic	TraesCS1A02G105800
ATAC	1A:102362532-102362795	ATAC.K2	2.59239	2.01413	0.981256	0.403424	genic	TraesCS1A02G105800
ATAC	1A:102364641-102364763	ATAC.K2	1.56749	0.919199	0.331333	0.281175	genic	TraesCS1A02G105800
ATAC	1A:102365750-102365982	ATAC.K3	1.20576	2.81167	1.00674	0.696824	promoter	TraesCS1A02G105900
ATAC	1A:102367603-102368368	ATAC.K4	0.823936	1.28418	4.07795	4.65772	genic	TraesCS1A02G105900
ATAC	1A:102374986-102375257	ATAC.K1	0.381824	1.27066	0.981256	1.06357	promoter	TraesCS1A02G106000
ATAC	1A:10241529-10241965	ATAC.K3	2.19047	11.3278	4.05246	3.27629	promoter	TraesCS1A02G021500
ATAC	1A:10242287-10242442	ATAC.K3	1.16557	1.51397	0.586205	0.2445	promoter	TraesCS1A02G021500
ATAC	1A:103314196-103314383	ATAC.K2	0.622976	0.51367	0.369564	0.232275	genic	TraesCS1A02G106100
ATAC	1A:103315381-103315618	ATAC.K2	0.823936	0.594776	0.446025	0.26895	genic	TraesCS1A02G106100
ATAC	1A:103635054-103635988	ATAC.K4	1.86893	1.8384	2.90554	4.79219	genic	TraesCS1A02G106200
ATAC	1A:103636431-103636736	ATAC.K4	0.442112	0.486635	1.13418	1.82152	promoter	TraesCS1A02G106200
ATAC	1A:104223096-104224232	ATAC.K4	3.05459	0.729952	4.62592	8.99758	promoter	TraesCS1A02G106400
ATAC	1A:10423673-10423817	ATAC.K2	0.582784	0.189247	0.140179	0.158925	genic	TraesCS1A02G021600
ATAC	1A:10424353-10425098	ATAC.K2	6.0489	1.3788	0.930281	0.819074	promoter	TraesCS1A02G021600
ATAC	1A:104376670-104376835	ATAC.K3	3.21536	3.37941	1.32533	1.00245	promoter	TraesCS1A02G106600
ATAC	1A:104379371-104379450	ATAC.K2	0.60288	0.324423	0.254872	0.0733499	genic	TraesCS1A02G106600
ATAC	1A:104434615-104434866	ATAC.K1	0.622976	1.13548	1.44002	1.55257	promoter	TraesCS1A02G106700
ATAC	1A:104583040-104583472	ATAC.K4	0.160768	0.0540705	0.611692	1.65037	genic	TraesCS1A02G107000
ATAC	1A:104930808-104931294	ATAC.K2	4.55175	1.48694	1.40179	1.73595	promoter	TraesCS1A02G107200
ATAC	1A:104936697-104937124	ATAC.K4	0.643072	1.02734	1.44002	1.49145	genic	TraesCS1A02G107200
ATAC	1A:104949655-104949955	ATAC.K1	0.542592	1.29769	1.65667	1.24695	promoter	TraesCS1A02G107300
ATAC	1A:105299463-105299987	ATAC.K1	0.241152	0.567741	0.739128	0.660149	promoter	TraesCS1A02G107400
ATAC	1A:105302217-105302420	ATAC.K4	0.221056	0.297388	0.700897	0.599024	promoter	TraesCS1A02G107400
ATAC	1A:105302942-105303273	ATAC.K2	0.964609	0.189247	0.305846	0.464549	promoter	TraesCS1A02G107400
ATAC	1A:10602673-10602755	ATAC.K2	0.30144	0.0540705	0.0127436	0.0488999	genic	TraesCS1A02G022000
ATAC	1A:10607183-10607534	ATAC.K2	1.04499	0.297388	0.114692	0.12225	promoter	TraesCS1A02G022000
ATAC	1A:106217942-106218464	ATAC.K3	7.97812	7.59691	2.91828	1.14915	promoter	TraesCS1A02G107700
ATAC	1A:106218550-106218713	ATAC.K2	1.64787	0.581258	0.191154	0.22005	promoter	TraesCS1A02G107700
ATAC	1A:107466159-107466599	ATAC.K1	0.5024	0.838093	1.22338	1.05135	promoter	TraesCS1A02G108300
ATAC	1A:107475829-107476042	ATAC.K4	0.010048	0.0811058	0.089205	0.2445	genic	TraesCS1A02G108300
ATAC	1A:10748490-10748768	ATAC.K4	0.180864	0.0540705	0.815589	1.63815	promoter	TraesCS1A02G022400
ATAC	1A:10751122-10751321	ATAC.K2	0.281344	0.0270353	0.0254872	0.0733499	genic	TraesCS1A02G022400
ATAC	1A:107644162-107644710	ATAC.K4	1.28614	1.05438	3.70838	3.97312	promoter	TraesCS1A02G108500
ATAC	1A:107778882-107779156	ATAC.K4	0.080384	0.0811058	0.407795	0.281175	promoter	TraesCS1A02G108600
ATAC	1A:108070523-108070729	ATAC.K1	1.84883	4.05529	2.90554	2.6406	promoter	TraesCS1A02G108800
ATAC	1A:108690870-108691382	ATAC.K3	0.783744	7.9754	2.00074	1.49145	genic	TraesCS1A02G109200
ATAC	1A:108769327-108769603	ATAC.K1	1.66797	4.47434	4.11618	4.52324	promoter	TraesCS1A02G109500
ATAC	1A:108796123-108796344	ATAC.K4	1.0048	1.3788	1.45277	2.66505	promoter	TraesCS1A02G109800
ATAC	1A:108796683-108796811	ATAC.K4	0.30144	0.135176	0.35682	0.782399	promoter	TraesCS1A02G109800
ATAC	1A:108796914-108797181	ATAC.K4	0.341632	0.324423	1.94977	3.66749	promoter	TraesCS1A02G109800
ATAC	1A:108921731-108922203	ATAC.K2	4.36083	1.75729	3.24961	3.20294	promoter	TraesCS1A02G110000
ATAC	1A:109573630-109573961	ATAC.K1	0.884224	1.47342	1.96251	1.67482	promoter	TraesCS1A02G110200
ATAC	1A:110072558-110072856	ATAC.K1	0.422016	1.58156	1.56746	1.30807	promoter	TraesCS1A02G110400
ATAC	1A:110282823-110282972	ATAC.K1	0.190912	0.594776	0.458769	0.684599	genic	TraesCS1A02G110800
ATAC	1A:110284469-110284903	ATAC.K4	0.20096	0.648846	1.61843	1.82152	promoter	TraesCS1A02G110800
ATAC	1A:111122449-111122848	ATAC.K1	0.361728	2.13579	1.05772	1.39365	promoter	TraesCS1A02G110900
ATAC	1A:111152380-111152627	ATAC.K4	0.060288	0.216282	0.624435	0.929098	genic	TraesCS1A02G111000
ATAC	1A:11234709-11234831	ATAC.K2	0.261248	0.216282	0.0127436	0.0733499	promoter	TraesCS1A02G022700
ATAC	1A:11239965-11240054	ATAC.K2	0.562688	0.0811058	0.0764615	0.1956	promoter	TraesCS1A02G022800
ATAC	1A:11240419-11240574	ATAC.K2	0.542592	0.189247	0.254872	0.134475	promoter	TraesCS1A02G022800
ATAC	1A:112927208-112927912	ATAC.K4	0.442112	1.54101	3.93777	4.41322	promoter	TraesCS1A02G111500
ATAC	1A:112934824-112935058	ATAC.K1	0.422016	1.05438	1.60569	1.467	promoter	TraesCS1A02G111600
ATAC	1A:112944230-112944665	ATAC.K4	0.221056	0.0540705	1.5802	2.1027	promoter	TraesCS1A02G111700
ATAC	1A:113252039-113252643	ATAC.K4	3.29575	3.40644	7.22561	6.77264	promoter	TraesCS1A02G111800
ATAC	1A:113855979-113856083	ATAC.K1	0.040192	0.216282	0.318589	0.1956	genic	TraesCS1A02G112000
ATAC	1A:11387134-11387334	ATAC.K2	0.823936	0.270353	0.127436	0.26895	promoter	TraesCS1A02G022900
ATAC	1A:113881311-113881388	ATAC.K2	0.422016	0.175729	0.089205	0.0855749	promoter	TraesCS1A02G112200
ATAC	1A:114545549-114545800	ATAC.K2	1.2359	0.243317	0.586205	0.403424	genic	TraesCS1A02G112500
ATAC	1A:114547960-114548053	ATAC.K2	0.70336	0.540705	0.280359	0.513449	promoter	TraesCS1A02G112600
ATAC	1A:115360899-115361493	ATAC.K1	2.0297	4.35268	3.17315	3.37409	genic	TraesCS1A02G112700
ATAC	1A:115368763-115369423	ATAC.K1	1.46701	2.94684	2.79084	3.58192	promoter	TraesCS1A02G112800
ATAC	1A:11551417-11551738	ATAC.K3	3.21536	3.81197	0.229384	0.586799	promoter	TraesCS1A02G023300
ATAC	1A:11553665-11553730	ATAC.K2	0.5024	0.243317	0.114692	0.0488999	promoter	TraesCS1A02G023300
ATAC	1A:11553838-11554168	ATAC.K2	2.59239	0.378494	0.484256	0.232275	promoter	TraesCS1A02G023300
ATAC	1A:11575965-11576029	ATAC.K2	0.40192	0.162212	0.0637179	0.02445	promoter	TraesCS1A02G023500
ATAC	1A:11579388-11579485	ATAC.K2	0.422016	0.243317	0.17841	0.0977998	genic	TraesCS1A02G023500
ATAC	1A:11581202-11581660	ATAC.K4	2.65267	1.40583	1.5802	3.09292	genic	TraesCS1A02G023500
ATAC	1A:1162386-1162836	ATAC.K1	1.54739	2.64946	3.60643	2.6406	promoter	TraesCS1A02G001900
ATAC	1A:11633221-11633553	ATAC.K2	0.70336	0.2298	0.191154	0.415649	genic	TraesCS1A02G023600
ATAC	1A:11645032-11645152	ATAC.K2	0.663168	0.135176	0.369564	0.22005	promoter	TraesCS1A02G023700
ATAC	1A:11659054-11659701	ATAC.K4	4.98381	3.13609	4.38379	7.33499	promoter	TraesCS1A02G023800
ATAC	1A:11662092-11662225	ATAC.K4	0.381824	0.135176	0.777358	0.476774	promoter	TraesCS1A02G023800
ATAC	1A:117165289-117165786	ATAC.K4	1.36653	1.70322	3.28784	3.15404	promoter	TraesCS1A02G113500
ATAC	1A:117198098-117198465	ATAC.K4	1.96941	2.93333	4.34556	4.15649	promoter	TraesCS1A02G113700
ATAC	1A:117243862-117244585	ATAC.K4	2.0297	2.298	6.61392	6.49146	promoter	TraesCS1A02G113800
ATAC	1A:117890521-117891158	ATAC.K3	3.49671	8.92164	2.44677	2.6895	promoter	TraesCS1A02G113900
ATAC	1A:118503821-118504250	ATAC.K1	2.25075	6.89399	6.65215	5.74574	promoter	TraesCS1A02G114300
ATAC	1A:118509079-118509238	ATAC.K1	0.221056	0.594776	0.739128	0.599024	genic	TraesCS1A02G114300
ATAC	1A:118557620-118557943	ATAC.K3	0.924416	2.74408	1.22338	1.05135	genic	TraesCS1A02G114400
ATAC	1A:11893821-11894186	ATAC.K1	1.04499	3.19016	3.17315	3.53302	promoter	TraesCS1A02G024300
ATAC	1A:119711590-119712387	ATAC.K4	0.743552	0.567741	1.47826	1.6626	genic	TraesCS1A02G115300
ATAC	1A:12007045-12007362	ATAC.K4	0.984705	0.432564	1.38905	0.574574	promoter	TraesCS1A02G024400
ATAC	1A:120363625-120364338	ATAC.K3	0.924416	4.08232	1.60569	0.635699	promoter	TraesCS1A02G115700
ATAC	1A:120374039-120374678	ATAC.K3	2.63258	3.96067	1.56746	0.990223	promoter	TraesCS1A02G115800
ATAC	1A:120376523-120377378	ATAC.K3	5.26515	9.84084	2.06446	1.39365	genic	TraesCS1A02G115800
ATAC	1A:120377579-120378129	ATAC.K3	4.15987	5.1367	1.97525	1.2225	genic	TraesCS1A02G115800
ATAC	1A:12095181-12095304	ATAC.K4	0.522496	0.0540705	0.739128	1.8093	promoter	TraesCS1A02G024600
ATAC	1A:12105565-12105814	ATAC.K3	1.96941	1.94654	1.03223	1.25917	promoter	TraesCS1A02G024700
ATAC	1A:12108851-12109047	ATAC.K4	0.5024	0.946234	1.73313	1.78485	promoter	TraesCS1A02G024800
ATAC	1A:121129244-121129402	ATAC.K3	0.542592	0.811058	0.509743	0.158925	promoter	TraesCS1A02G115900
ATAC	1A:121129728-121130098	ATAC.K1	1.06509	3.24423	1.88605	2.04157	promoter	TraesCS1A02G115900
ATAC	1A:121132301-121132541	ATAC.K1	0.30144	0.892164	1.04497	0.782399	promoter	TraesCS1A02G115900
ATAC	1A:121137580-121137904	ATAC.K1	1.04499	2.56835	1.86056	1.65037	promoter	TraesCS1A02G116000
ATAC	1A:12138947-12139132	ATAC.K2	1.11533	0.892164	0.484256	0.513449	promoter	TraesCS1A02G025000
ATAC	1A:12144277-12144836	ATAC.K1	2.33114	4.1364	5.14841	4.59659	promoter	TraesCS1A02G025100
ATAC	1A:12147474-12147703	ATAC.K2	1.08518	0.405529	0.624435	0.440099	promoter	TraesCS1A02G025100
ATAC	1A:12164746-12164961	ATAC.K1	0.964609	2.00061	2.82907	2.43277	promoter	TraesCS1A02G025200
ATAC	1A:121745964-121746388	ATAC.K1	1.38662	2.62242	2.96925	2.5917	promoter	TraesCS1A02G116200
ATAC	1A:121881855-121882075	ATAC.K1	0.522496	0.811058	1.22338	1.01467	promoter	TraesCS1A02G116300
ATAC	1A:12215963-12216442	ATAC.K2	3.0345	0.189247	0.739128	0.452324	promoter	TraesCS1A02G025500
ATAC	1A:12311200-12311681	ATAC.K2	6.75226	2.31152	3.79759	4.10759	promoter	TraesCS1A02G025600
ATAC	1A:12318075-12318605	ATAC.K3	3.61728	6.00183	3.16041	2.81175	promoter	TraesCS1A02G025700
ATAC	1A:1233342-1233451	ATAC.K2	0.763648	0.310906	0.420538	0.330074	genic	TraesCS1A02G002500
ATAC	1A:12354856-12355342	ATAC.K4	1.62778	1.6897	3.41528	5.30564	promoter	TraesCS1A02G025800
ATAC	1A:123552480-123552897	ATAC.K1	1.46701	2.32503	3.54271	2.35942	promoter	TraesCS1A02G116500
ATAC	1A:12369726-12370170	ATAC.K4	4.92352	4.48785	7.90102	10.0367	genic	TraesCS1A02G025900
ATAC	1A:124010612-124011116	ATAC.K2	12.8414	6.137	9.1244	8.21519	promoter	TraesCS1A02G116700
ATAC	1A:124011415-124011485	ATAC.K2	0.783744	0.108141	0.114692	0.17115	promoter	TraesCS1A02G116700
ATAC	1A:124014180-124014276	ATAC.K2	1.20576	0.135176	0.369564	0.1467	promoter	TraesCS1A02G116800
ATAC	1A:124188572-124189326	ATAC.K4	2.99431	2.24393	7.28933	8.54526	promoter	TraesCS1A02G117100
ATAC	1A:124885258-124886167	ATAC.K2	5.14458	2.78463	1.82233	2.66505	genic	TraesCS1A02G117500
ATAC	1A:124892646-124892786	ATAC.K4	0.10048	0.270353	0.67541	0.611249	promoter	TraesCS1A02G117500
ATAC	1A:124897799-124898072	ATAC.K1	1.28614	2.3791	3.04572	3.08069	promoter	TraesCS1A02G117600
ATAC	1A:12502500-12502755	ATAC.K2	4.07949	1.21659	2.15366	2.28607	promoter	TraesCS1A02G026200
ATAC	1A:125149894-125150091	ATAC.K2	0.833984	0.0811058	0.203897	0.232275	promoter	TraesCS1A02G117900
ATAC	1A:125150155-125150297	ATAC.K2	0.763648	0.0270353	0.127436	0.134475	promoter	TraesCS1A02G117900
ATAC	1A:125155531-125155736	ATAC.K2	0.763648	0.243317	0.17841	0.26895	genic	TraesCS1A02G118000
ATAC	1A:125156000-125156146	ATAC.K2	0.422016	0.108141	0.127436	0.0977998	genic	TraesCS1A02G118000
ATAC	1A:12572271-12572423	ATAC.K2	0.532544	0.432564	0.127436	0.1467	genic	TraesCS1A02G026300
ATAC	1A:12572977-12573201	ATAC.K2	0.864128	0.51367	0.497	0.342299	promoter	TraesCS1A02G026300
ATAC	1A:12591132-12591282	ATAC.K4	0.20096	0.270353	0.879307	1.7604	genic	TraesCS1A02G026400
ATAC	1A:126511739-126511906	ATAC.K4	0.522496	0.702917	1.26161	1.28362	promoter	TraesCS1A02G118100
ATAC	1A:126512718-126513064	ATAC.K4	1.14547	1.48694	4.21812	3.64304	genic	TraesCS1A02G118100
ATAC	1A:126513859-126514314	ATAC.K4	2.21056	3.51458	7.23835	6.83376	genic	TraesCS1A02G118100
ATAC	1A:126515803-126515890	ATAC.K1	0.060288	0.486635	0.382307	0.354524	genic	TraesCS1A02G118100
ATAC	1A:12668355-12668887	ATAC.K4	0.683264	1.16252	0.866563	1.87042	promoter	TraesCS1A02G026600
ATAC	1A:12669363-12669743	ATAC.K2	1.92922	1.05438	0.828333	1.35697	promoter	TraesCS1A02G026600
ATAC	1A:12698724-12698839	ATAC.K2	0.663168	0.432564	0.101949	0.623474	promoter	TraesCS1A02G026800
ATAC	1A:127078708-127078967	ATAC.K3	0.683264	3.01443	1.35082	1.55257	promoter	TraesCS1A02G118400
ATAC	1A:127079098-127079264	ATAC.K3	0.221056	2.298	0.815589	1.19805	promoter	TraesCS1A02G118400
ATAC	1A:127079388-127079795	ATAC.K3	4.0192	9.42179	4.21812	3.63082	promoter	TraesCS1A02G118400
ATAC	1A:12779255-12779543	ATAC.K2	1.32634	0.432564	0.280359	0.1467	genic	TraesCS1A02G027000
ATAC	1A:127833372-127833570	ATAC.K3	1.14547	2.86574	1.51649	1.01467	genic	TraesCS1A02G118900
ATAC	1A:128633625-128633952	ATAC.K4	0.261248	0.0270353	1.12143	1.45477	promoter	TraesCS1A02G119000
ATAC	1A:12864970-12865479	ATAC.K4	0.964609	0.405529	8.85679	10.0123	promoter	TraesCS1A02G027100
ATAC	1A:13009815-13009995	ATAC.K1	0.622976	1.9195	2.31933	2.13937	promoter	TraesCS1A02G027500
ATAC	1A:130150709-130151030	ATAC.K3	0.5024	1.98709	0.688153	0.696824	genic	TraesCS1A02G119300
ATAC	1A:130349399-130349652	ATAC.K2	0.90432	0.162212	0.305846	0.550124	promoter	TraesCS1A02G119400
ATAC	1A:130913049-130913409	ATAC.K1	2.27085	4.75821	7.00897	6.19806	promoter	TraesCS1A02G119500
ATAC	1A:130914466-130914629	ATAC.K1	0.321536	1.29769	0.993999	1.49145	promoter	TraesCS1A02G119500
ATAC	1A:132134718-132134863	ATAC.K4	0.281344	0.0811058	0.828333	0.819074	genic	TraesCS1A02G119800
ATAC	1A:132135780-132136323	ATAC.K1	1.90912	6.2857	7.39128	6.67484	promoter	TraesCS1A02G119800
ATAC	1A:132263087-132263236	ATAC.K4	0.30144	0.351458	0.560717	0.880198	promoter	TraesCS1A02G119900
ATAC	1A:132264218-132264309	ATAC.K2	0.522496	0.256835	0.254872	0.12225	promoter	TraesCS1A02G119900
ATAC	1A:132265246-132265512	ATAC.K3	0.984705	1.63563	0.509743	0.537899	genic	TraesCS1A02G119900
ATAC	1A:13254824-13254969	ATAC.K1	0.040192	0.189247	0.254872	0.305624	promoter	TraesCS1A02G027900
ATAC	1A:13270776-13271392	ATAC.K2	1.12538	0.189247	0.35682	0.281175	promoter	TraesCS1A02G028000
ATAC	1A:133165674-133165893	ATAC.K1	0.442112	1.24362	1.84782	1.28362	genic	TraesCS1A02G120800
ATAC	1A:133418050-133418849	ATAC.K3	1.0048	2.66297	1.56746	1.2714	genic	TraesCS1A02G121000
ATAC	1A:134963782-134964090	ATAC.K1	0.422016	1.08141	1.09595	1.0758	promoter	TraesCS1A02G121400
ATAC	1A:135507799-135508108	ATAC.K2	0.944512	0.432564	0.254872	0.281175	promoter	TraesCS1A02G121600
ATAC	1A:135966434-135967068	ATAC.K2	16.3782	7.35359	9.35379	8.38634	genic	TraesCS1A02G121800
ATAC	1A:135967213-135967407	ATAC.K2	1.58758	0.0270353	0.203897	0.0977998	genic	TraesCS1A02G121800
ATAC	1A:135967576-135968078	ATAC.K2	4.86323	0.351458	0.331333	0.415649	promoter	TraesCS1A02G121800
ATAC	1A:135968278-135968461	ATAC.K2	1.74835	0.243317	0.229384	0.12225	promoter	TraesCS1A02G121800
ATAC	1A:13667099-13667808	ATAC.K4	2.47181	1.18955	3.46625	3.33742	genic	TraesCS1A02G029100
ATAC	1A:13675505-13675721	ATAC.K2	1.22586	1.09493	0.433282	0.733499	promoter	TraesCS1A02G029200
ATAC	1A:136928174-136928277	ATAC.K1	0.010048	0.297388	0.267615	0.134475	genic	TraesCS1A02G122100
ATAC	1A:136950320-136950622	ATAC.K4	0.30144	0.554223	0.586205	1.08802	genic	TraesCS1A02G122100
ATAC	1A:137230830-137231547	ATAC.K1	0.964609	1.59508	2.33207	1.956	promoter	TraesCS1A02G122200
ATAC	1A:137412227-137412450	ATAC.K4	0.120576	0.243317	0.611692	0.562349	promoter	TraesCS1A02G122400
ATAC	1A:13760168-13760448	ATAC.K2	7.21447	2.86574	2.90554	1.68705	promoter	TraesCS1A02G029300
ATAC	1A:13761732-13761825	ATAC.K3	0.964609	1.29769	0.815589	0.403424	promoter	TraesCS1A02G029300
ATAC	1A:13762037-13762398	ATAC.K4	0.844032	1.4599	3.78484	4.54769	promoter	TraesCS1A02G029300
ATAC	1A:13767548-13767701	ATAC.K2	1.62778	0.486635	0.433282	0.256725	genic	TraesCS1A02G029300
ATAC	1A:13767762-13769264	ATAC.K2	13.9868	4.97449	5.7601	3.64304	genic	TraesCS1A02G029300
ATAC	1A:138225479-138225854	ATAC.K2	6.95322	1.70322	1.93702	2.07825	genic	TraesCS1A02G122500
ATAC	1A:138226147-138226620	ATAC.K2	5.83789	0.594776	0.458769	0.806849	genic	TraesCS1A02G122500
ATAC	1A:138226773-138227056	ATAC.K2	3.54695	0.324423	0.35682	0.427874	genic	TraesCS1A02G122500
ATAC	1A:138227295-138227475	ATAC.K2	2.31104	0.297388	0.229384	0.330074	genic	TraesCS1A02G122500
ATAC	1A:13858178-13858714	ATAC.K4	0.582784	0.297388	5.2631	7.83621	genic	TraesCS1A02G029700
ATAC	1A:13861540-13861714	ATAC.K2	1.5273	0.729952	0.471512	0.647924	genic	TraesCS1A02G029800
ATAC	1A:13865456-13865796	ATAC.K4	1.82874	2.94684	4.70238	5.25674	promoter	TraesCS1A02G029800
ATAC	1A:139552454-139553005	ATAC.K1	1.14547	2.56835	2.29384	3.37409	promoter	TraesCS1A02G122600
ATAC	1A:139640237-139640720	ATAC.K1	2.61248	4.56896	6.12966	5.57459	promoter	TraesCS1A02G122800
ATAC	1A:13970211-13970653	ATAC.K2	3.61728	0.838093	0.917538	0.806849	promoter	TraesCS1A02G029900
ATAC	1A:13971452-13971899	ATAC.K4	0.30144	0.432564	4.3583	4.26652	promoter	TraesCS1A02G029900
ATAC	1A:13972230-13972730	ATAC.K4	1.28614	1.35176	4.90628	3.63082	promoter	TraesCS1A02G029900
ATAC	1A:13979046-13979335	ATAC.K4	0.844032	0.405529	2.12818	1.24695	promoter	TraesCS1A02G030000
ATAC	1A:140960327-140960975	ATAC.K4	1.32634	1.73026	3.09669	3.28852	promoter	TraesCS1A02G122900
ATAC	1A:14110937-14111405	ATAC.K3	1.40672	1.94654	1.09595	0.709049	promoter	TraesCS1A02G030400
ATAC	1A:14139590-14139881	ATAC.K1	2.0096	4.43378	4.32007	4.68217	promoter	TraesCS1A02G030500
ATAC	1A:14144677-14145054	ATAC.K4	1.32634	1.4599	3.83582	4.07092	genic	TraesCS1A02G030600
ATAC	1A:14146262-14146348	ATAC.K1	0.010048	0.364976	0.152923	0.207825	promoter	TraesCS1A02G030600
ATAC	1A:14254912-14255072	ATAC.K3	0.080384	1.08141	0.152923	0.0977998	genic	TraesCS1A02G030900
ATAC	1A:14256611-14256792	ATAC.K2	0.462208	0.243317	0.0764615	0.134475	promoter	TraesCS1A02G030900
ATAC	1A:142888663-142889199	ATAC.K1	2.55219	6.02886	5.27584	4.03424	promoter	TraesCS1A02G123200
ATAC	1A:143280897-143281404	ATAC.K4	0.864128	1.18955	1.50374	1.9071	promoter	TraesCS1A02G123300
ATAC	1A:14467640-14467738	ATAC.K4	0.040192	0.108141	0.280359	0.305624	promoter	TraesCS1A02G031100
ATAC	1A:14468950-14469362	ATAC.K4	0.361728	0.297388	1.18515	1.2714	genic	TraesCS1A02G031100
ATAC	1A:14503097-14503523	ATAC.K4	1.28614	1.75729	5.47974	6.85821	promoter	TraesCS1A02G031200
ATAC	1A:14550391-14550663	ATAC.K2	0.643072	0.297388	0.254872	0.0733499	promoter	TraesCS1A02G031500
ATAC	1A:14584809-14584944	ATAC.K1	0.683264	1.94654	1.32533	1.1736	promoter	TraesCS1A02G031700
ATAC	1A:14609178-14609515	ATAC.K4	1.10528	0.97327	2.01349	3.33742	genic	TraesCS1A02G031900
ATAC	1A:14611292-14611562	ATAC.K4	0.221056	0.270353	0.509743	1.23472	genic	TraesCS1A02G031900
ATAC	1A:14615724-14615857	ATAC.K4	0.261248	0.0811058	0.968512	1.1736	promoter	TraesCS1A02G031900
ATAC	1A:146631567-146631938	ATAC.K4	0.160768	0.216282	1.10869	1.98045	genic	TraesCS1A02G124200
ATAC	1A:146637553-146637913	ATAC.K1	1.20576	3.2172	4.25636	3.98534	promoter	TraesCS1A02G124200
ATAC	1A:146942474-146942709	ATAC.K1	0.763648	1.70322	1.92428	1.6626	promoter	TraesCS1A02G124300
ATAC	1A:146953801-146954243	ATAC.K3	4.64218	4.46082	1.51649	1.1736	promoter	TraesCS1A02G124400
ATAC	1A:14746979-14747104	ATAC.K2	0.381824	0.108141	0.0764615	0.02445	genic	TraesCS1A02G032000
ATAC	1A:147674537-147674915	ATAC.K4	1.20576	1.78433	2.56146	3.25184	promoter	TraesCS1A02G124700
ATAC	1A:14799175-14799886	ATAC.K4	0.40192	0.0270353	2.49774	2.445	genic	TraesCS1A02G032200
ATAC	1A:14800648-14800771	ATAC.K4	0.381824	0.0270353	0.497	0.684599	promoter	TraesCS1A02G032200
ATAC	1A:14801112-14801454	ATAC.K2	1.10528	0.405529	0.662666	0.562349	promoter	TraesCS1A02G032200
ATAC	1A:14840659-14841025	ATAC.K2	1.20576	0.243317	0.242128	0.22005	promoter	TraesCS1A02G032300
ATAC	1A:14856911-14857574	ATAC.K4	0.70336	0.486635	2.10269	2.82397	genic	TraesCS1A02G032400
ATAC	1A:14857771-14857949	ATAC.K2	0.723456	0.270353	0.254872	0.17115	promoter	TraesCS1A02G032400
ATAC	1A:14858163-14858530	ATAC.K4	1.54739	0.702917	2.00074	2.45722	promoter	TraesCS1A02G032400
ATAC	1A:148953230-148953367	ATAC.K2	0.522496	0.216282	0.089205	0.26895	promoter	TraesCS1A02G125300
ATAC	1A:149353879-149354661	ATAC.K4	0.30144	0.486635	6.74135	6.98046	genic	TraesCS1A02G125400
ATAC	1A:149356025-149356197	ATAC.K4	1.0249	0.97327	2.39579	1.62592	promoter	TraesCS1A02G125400
ATAC	1A:149510173-149510511	ATAC.K1	0.160768	0.648846	1.70764	0.647924	genic	TraesCS1A02G125500
ATAC	1A:150006014-150006137	ATAC.K4	0.080384	0.216282	0.662666	1.01467	promoter	TraesCS1A02G125700
ATAC	1A:150453001-150453073	ATAC.K1	0.020096	0.162212	0.0764615	0.256725	genic	TraesCS1A02G125800
ATAC	1A:150454724-150455096	ATAC.K2	0.844032	0.108141	0.293102	0.415649	genic	TraesCS1A02G125800
ATAC	1A:150455189-150455328	ATAC.K2	0.261248	0.0270353	0.0254872	0.0733499	genic	TraesCS1A02G125800
ATAC	1A:150900215-150900802	ATAC.K4	3.41632	2.3791	8.57643	7.33499	genic	TraesCS1A02G126100
ATAC	1A:150902035-150902612	ATAC.K4	3.07469	4.09584	16.1589	15.4646	promoter	TraesCS1A02G126100
ATAC	1A:150903584-150903869	ATAC.K4	1.04499	1.56805	2.40854	2.23717	promoter	TraesCS1A02G126100
ATAC	1A:151349459-151349677	ATAC.K4	0.321536	0.459599	0.981256	0.977998	promoter	TraesCS1A02G126200
ATAC	1A:151351165-151351279	ATAC.K2	0.422016	0.162212	0.0764615	0.0977998	promoter	TraesCS1A02G126200
ATAC	1A:151771112-151771284	ATAC.K1	0.221056	0.405529	0.71364	0.391199	promoter	TraesCS1A02G126300
ATAC	1A:151877349-151877560	ATAC.K3	0.924416	2.298	0.688153	0.635699	promoter	TraesCS1A02G126400
ATAC	1A:153338160-153338496	ATAC.K4	0.241152	0.297388	1.83508	1.49145	genic	TraesCS1A02G126800
ATAC	1A:15346304-15346447	ATAC.K2	0.381824	0.0270353	0.0509743	0.0733499	genic	TraesCS1A02G032900
ATAC	1A:15348479-15348652	ATAC.K2	1.18566	0.243317	0.229384	0.342299	promoter	TraesCS1A02G032900
ATAC	1A:153579664-153579754	ATAC.K2	0.944512	0.594776	0.344077	0.134475	promoter	TraesCS1A02G126900
ATAC	1A:153580514-153581094	ATAC.K1	2.71296	6.02886	6.3463	5.55014	promoter	TraesCS1A02G126900
ATAC	1A:154006360-154006618	ATAC.K3	0.221056	2.05468	0.293102	0.880198	promoter	TraesCS1A02G127000
ATAC	1A:154007609-154007849	ATAC.K3	0.442112	1.64915	0.828333	0.990223	promoter	TraesCS1A02G127000
ATAC	1A:154014726-154014881	ATAC.K1	0.010048	0.162212	0.229384	0.2445	genic	TraesCS1A02G127000
ATAC	1A:154698641-154699314	ATAC.K2	2.41152	0.919199	1.63118	1.23472	promoter	TraesCS1A02G127500
ATAC	1A:155068545-155068872	ATAC.K3	0.281344	1.149	0.662666	0.599024	promoter	TraesCS1A02G127600
ATAC	1A:15515999-15516793	ATAC.K2	13.5246	4.6771	4.0652	4.32764	promoter	TraesCS1A02G033200
ATAC	1A:157512296-157512522	ATAC.K1	0.120576	0.162212	0.522487	0.0733499	promoter	TraesCS1A02G128500
ATAC	1A:159516152-159516649	ATAC.K4	0.341632	0.162212	1.93702	1.19805	promoter	TraesCS1A02G128900
ATAC	1A:159518613-159519876	ATAC.K1	1.64787	2.46021	4.23087	3.23962	genic	TraesCS1A02G128900
ATAC	1A:161671467-161671710	ATAC.K2	0.321536	0.0270353	0.0509743	0.012225	promoter	TraesCS1A02G129000
ATAC	1A:163383777-163384112	ATAC.K1	1.42682	3.08202	2.31933	2.90954	promoter	TraesCS1A02G129100
ATAC	1A:16409762-16410019	ATAC.K1	0.140672	0.554223	0.67541	0.831299	genic	TraesCS1A02G033600
ATAC	1A:16426672-16426745	ATAC.K2	0.261248	0.108141	0.0764615	0.02445	genic	TraesCS1A02G033700
ATAC	1A:165171703-165172021	ATAC.K1	0.643072	1.81136	1.63118	1.89487	genic	TraesCS1A02G129400
ATAC	1A:165172151-165173301	ATAC.K1	0.70336	5.05559	3.63192	7.20051	genic	TraesCS1A02G129400
ATAC	1A:165173512-165173787	ATAC.K1	0.180864	0.784023	0.688153	1.0758	genic	TraesCS1A02G129400
ATAC	1A:167804767-167805048	ATAC.K4	0.20096	0.432564	0.433282	0.696824	promoter	TraesCS1A02G129800
ATAC	1A:168260832-168261212	ATAC.K1	0.924416	2.21689	2.01349	1.63815	promoter	TraesCS1A02G129900
ATAC	1A:16931233-16931911	ATAC.K4	2.75315	4.54192	6.20612	8.34966	genic	TraesCS1A02G034300
ATAC	1A:16934448-16934643	ATAC.K3	0.944512	2.79815	1.42728	1.62592	promoter	TraesCS1A02G034300
ATAC	1A:169654208-169654786	ATAC.K1	1.62778	3.60921	3.23687	2.65282	genic	TraesCS1A02G130800
ATAC	1A:1699207-1699516	ATAC.K3	0.442112	1.81136	0.152923	0.256725	promoter	TraesCS1A02G003100
ATAC	1A:1699608-1699836	ATAC.K3	1.18566	2.44669	1.45277	0.672374	promoter	TraesCS1A02G003100
ATAC	1A:1720099-1720344	ATAC.K2	1.78854	0.297388	0.140179	0.232275	promoter	TraesCS1A02G003200
ATAC	1A:17237931-17238260	ATAC.K4	0.10048	0.567741	1.24887	1.5159	promoter	TraesCS1A02G034500
ATAC	1A:1730789-1730998	ATAC.K2	0.442112	0.162212	0.0764615	0.0977998	genic	TraesCS1A02G003200
ATAC	1A:177435082-177435194	ATAC.K2	0.90432	0.0540705	0.191154	0.488999	promoter	TraesCS1A02G131800
ATAC	1A:177464695-177465094	ATAC.K4	3.27565	5.21781	7.77358	10.4157	promoter	TraesCS1A02G131900
ATAC	1A:177465494-177465629	ATAC.K4	0.221056	0.337941	0.446025	0.770174	promoter	TraesCS1A02G131900
ATAC	1A:177466023-177466122	ATAC.K1	0.080384	0.378494	0.586205	0.537899	genic	TraesCS1A02G131900
ATAC	1A:177466418-177466601	ATAC.K4	0.160768	0.405529	0.458769	1.05135	genic	TraesCS1A02G131900
ATAC	1A:1793516-1793651	ATAC.K2	0.482304	0.108141	0.0764615	0.0977998	genic	TraesCS1A02G003300
ATAC	1A:179537215-179537832	ATAC.K1	1.78854	3.92011	4.68964	3.97312	promoter	TraesCS1A02G132400
ATAC	1A:1801328-1801787	ATAC.K2	1.86893	0.486635	0.344077	0.391199	genic	TraesCS1A02G003300
ATAC	1A:180415309-180415698	ATAC.K2	2.45171	1.24362	1.35082	1.72372	promoter	TraesCS1A02G132500
ATAC	1A:18089867-18090013	ATAC.K4	0.080384	0.0135176	0.433282	0.2445	promoter	TraesCS1A02G034900
ATAC	1A:1809544-1809749	ATAC.K1	0.321536	0.675882	0.89205	0.770174	genic	TraesCS1A02G003300
ATAC	1A:1811889-1812252	ATAC.K2	1.10528	0.351458	0.293102	0.207825	genic	TraesCS1A02G003300
ATAC	1A:182076557-182077034	ATAC.K2	4.68237	1.75729	2.31933	3.25184	genic	TraesCS1A02G132800
ATAC	1A:182176280-182176352	ATAC.K2	0.160768	0.135176	0.0127436	0.02445	promoter	TraesCS1A02G132800
ATAC	1A:18462535-18462601	ATAC.K2	0.281344	0.270353	0.0254872	0.22005	promoter	TraesCS1A02G035200
ATAC	1A:185117124-185117525	ATAC.K2	0.683264	0.0811058	0.433282	0.366749	promoter	TraesCS1A02G133000
ATAC	1A:185118473-185118719	ATAC.K2	0.864128	0.51367	0.433282	0.1956	genic	TraesCS1A02G133000
ATAC	1A:19063210-19064042	ATAC.K4	6.71207	8.90812	12.4632	18.1663	promoter	TraesCS1A02G035600
ATAC	1A:19064990-19065124	ATAC.K4	0.261248	0.216282	0.35682	1.13692	promoter	TraesCS1A02G035600
ATAC	1A:191863009-191863133	ATAC.K1	0.180864	0.432564	0.637179	0.623474	promoter	TraesCS1A02G133900
ATAC	1A:197091281-197091666	ATAC.K4	1.0249	0.756987	2.12818	1.6137	genic	TraesCS1A02G134100
ATAC	1A:197096284-197096542	ATAC.K4	0.321536	0.405529	0.917538	0.757949	genic	TraesCS1A02G134100
ATAC	1A:197096720-197097048	ATAC.K2	2.83354	0.567741	0.700897	0.586799	genic	TraesCS1A02G134100
ATAC	1A:197102307-197102475	ATAC.K2	2.29095	0.811058	0.739128	0.819074	genic	TraesCS1A02G134100
ATAC	1A:197107423-197107542	ATAC.K2	0.180864	0.0135176	0.0127436	0.0366749	genic	TraesCS1A02G134100
ATAC	1A:20030987-20031396	ATAC.K2	1.58758	0.378494	0.229384	0.391199	promoter	TraesCS1A02G036000
ATAC	1A:20091778-20092055	ATAC.K3	0.763648	2.21689	1.15967	0.782399	genic	TraesCS1A02G036100
ATAC	1A:20094681-20094805	ATAC.K4	0.221056	0.351458	0.267615	0.684599	genic	TraesCS1A02G036100
ATAC	1A:201853639-201853741	ATAC.K4	0.080384	0.162212	0.280359	0.415649	genic	TraesCS1A02G134500
ATAC	1A:201854022-201854147	ATAC.K4	0.080384	0.162212	0.407795	0.317849	genic	TraesCS1A02G134500
ATAC	1A:201865279-201865499	ATAC.K1	0.40192	0.946234	1.47826	1.44255	promoter	TraesCS1A02G134500
ATAC	1A:201866177-201866380	ATAC.K2	0.743552	0.486635	0.305846	0.281175	promoter	TraesCS1A02G134500
ATAC	1A:202077709-202077814	ATAC.K1	0.020096	0.378494	0.35682	0.26895	genic	TraesCS1A02G134600
ATAC	1A:20246096-20246428	ATAC.K1	0.542592	1.78433	1.46551	1.77262	promoter	TraesCS1A02G036500
ATAC	1A:20371884-20372039	ATAC.K4	0.020096	0.0135176	0.331333	0.476774	promoter	TraesCS1A02G036600
ATAC	1A:20372454-20372965	ATAC.K4	0.060288	0.135176	3.14766	4.58437	promoter	TraesCS1A02G036600
ATAC	1A:20415813-20416011	ATAC.K1	0.120576	1.33825	2.25561	2.35942	genic	TraesCS1A02G036700
ATAC	1A:20416885-20417109	ATAC.K1	1.44691	2.59539	3.81033	3.45967	genic	TraesCS1A02G036700
ATAC	1A:20417721-20417898	ATAC.K1	0.20096	1.29769	1.01949	0.745724	genic	TraesCS1A02G036700
ATAC	1A:20418347-20418661	ATAC.K4	0.361728	1.18955	2.24287	2.67727	genic	TraesCS1A02G036700
ATAC	1A:20419178-20419605	ATAC.K4	0.663168	1.78433	4.7661	6.03914	promoter	TraesCS1A02G036700
ATAC	1A:20419762-20419881	ATAC.K4	0.10048	0.108141	1.07046	0.904648	promoter	TraesCS1A02G036700
ATAC	1A:20433264-20433829	ATAC.K2	2.06989	1.27066	0.955768	1.68705	promoter	TraesCS1A02G036800
ATAC	1A:20434426-20434538	ATAC.K4	0.10048	0.162212	0.624435	0.696824	promoter	TraesCS1A02G036800
ATAC	1A:204827330-204827494	ATAC.K4	0.241152	0.702917	1.14692	1.57702	genic	TraesCS1A02G134800
ATAC	1A:206792197-206792990	ATAC.K2	9.59585	3.37941	4.44751	4.93889	genic	TraesCS1A02G135100
ATAC	1A:206805015-206805654	ATAC.K4	1.26605	1.62212	3.26236	2.53057	promoter	TraesCS1A02G135100
ATAC	1A:208913464-208914140	ATAC.K4	1.18566	1.10845	2.12818	3.11737	genic	TraesCS1A02G135600
ATAC	1A:20895728-20895977	ATAC.K3	5.76756	11.4494	5.90028	4.65772	genic	TraesCS1A02G037400
ATAC	1A:20896469-20896582	ATAC.K3	0.864128	2.21689	0.560717	0.819074	genic	TraesCS1A02G037400
ATAC	1A:20932562-20933036	ATAC.K4	1.70816	1.0003	4.25636	4.03424	promoter	TraesCS1A02G037700
ATAC	1A:20934042-20934185	ATAC.K2	0.70336	0.135176	0.17841	0.317849	promoter	TraesCS1A02G037800
ATAC	1A:20934998-20935440	ATAC.K4	2.34119	2.08172	5.42876	6.77264	promoter	TraesCS1A02G037800
ATAC	1A:20998690-20998780	ATAC.K2	0.844032	0.243317	0.216641	0.1956	genic	TraesCS1A02G038100
ATAC	1A:21023362-21023498	ATAC.K2	1.24595	0.310906	0.471512	0.26895	genic	TraesCS1A02G038200
ATAC	1A:21042246-21042381	ATAC.K1	0.060288	0.135176	0.369564	0.0855749	genic	TraesCS1A02G038400
ATAC	1A:212018448-212018539	ATAC.K2	0.622976	0.405529	0.407795	0.12225	promoter	TraesCS1A02G135900
ATAC	1A:213918854-213919210	ATAC.K4	0.20096	0.432564	0.649922	0.733499	genic	TraesCS1A02G136200
ATAC	1A:213928507-213928780	ATAC.K1	0.060288	0.270353	0.739128	0.17115	genic	TraesCS1A02G136200
ATAC	1A:21400526-21400700	ATAC.K4	0.30144	0.567741	1.0832	2.4939	genic	TraesCS1A02G039300
ATAC	1A:21401114-21401549	ATAC.K4	1.34643	1.29769	7.0472	10.8191	genic	TraesCS1A02G039300
ATAC	1A:21402660-21403432	ATAC.K4	1.80864	0.675882	10.6154	13.7287	genic	TraesCS1A02G039300
ATAC	1A:21404203-21404476	ATAC.K3	2.35123	4.65007	2.34482	2.06602	genic	TraesCS1A02G039300
ATAC	1A:21405418-21405538	ATAC.K4	0.341632	0.621811	2.49774	3.36187	genic	TraesCS1A02G039300
ATAC	1A:21408361-21408606	ATAC.K3	1.10528	2.44669	0.993999	1.69927	promoter	TraesCS1A02G039300
ATAC	1A:2162510-2162586	ATAC.K2	0.180864	0.0811058	0.0127436	0.02445	genic	TraesCS1A02G003400
ATAC	1A:216414300-216415254	ATAC.K2	5.0441	2.21689	3.82307	3.98534	genic	TraesCS1A02G136400
ATAC	1A:218309468-218309758	ATAC.K2	2.87373	1.18955	1.491	1.2714	promoter	TraesCS1A02G136700
ATAC	1A:2185453-2185674	ATAC.K4	0.281344	0.0540705	0.751871	2.09047	promoter	TraesCS1A02G003500
ATAC	1A:2186030-2186162	ATAC.K4	0.30144	0.0270353	0.739128	1.11247	promoter	TraesCS1A02G003500
ATAC	1A:2186523-2187144	ATAC.K4	3.0345	0.865128	6.43551	9.55993	promoter	TraesCS1A02G003500
ATAC	1A:219382957-219383400	ATAC.K4	2.47181	1.78433	1.83508	4.14427	genic	TraesCS1A02G136900
ATAC	1A:219386298-219386391	ATAC.K2	1.0249	0.51367	0.420538	0.525674	promoter	TraesCS1A02G136900
ATAC	1A:21987023-21987182	ATAC.K2	0.833984	0.51367	0.280359	0.305624	promoter	TraesCS1A02G039800
ATAC	1A:2199695-2200453	ATAC.K4	1.0048	0.324423	9.29007	17.2372	promoter	TraesCS1A02G003546
ATAC	1A:2200623-2200799	ATAC.K4	0.060288	0.0540705	1.17241	2.7384	promoter	TraesCS1A02G003546
ATAC	1A:22077054-22077228	ATAC.K4	0.040192	0.189247	0.0764615	0.440099	promoter	TraesCS1A02G040100
ATAC	1A:221700783-221700949	ATAC.K4	0.060288	0.135176	0.229384	0.525674	genic	TraesCS1A02G137200
ATAC	1A:221707968-221708168	ATAC.K4	0.341632	0.108141	1.18515	0.684599	genic	TraesCS1A02G137200
ATAC	1A:221709361-221709635	ATAC.K4	1.10528	0.378494	1.72038	1.54035	genic	TraesCS1A02G137300
ATAC	1A:22272009-22272272	ATAC.K4	0.080384	0.0270353	0.522487	0.623474	promoter	TraesCS1A02G040200
ATAC	1A:22283073-22283438	ATAC.K4	0.10048	0.135176	0.611692	1.49145	promoter	TraesCS1A02G040300
ATAC	1A:22283980-22284328	ATAC.K4	0.20096	0.135176	0.458769	1.18582	promoter	TraesCS1A02G040300
ATAC	1A:22333648-22333836	ATAC.K2	3.87853	2.16282	1.46551	1.19805	promoter	TraesCS1A02G040700
ATAC	1A:22335041-22335497	ATAC.K1	4.17997	9.16495	9.36653	8.36189	promoter	TraesCS1A02G040700
ATAC	1A:22342684-22342990	ATAC.K4	0.844032	0.675882	2.33207	2.09047	promoter	TraesCS1A02G040800
ATAC	1A:223444215-223444361	ATAC.K2	0.35168	0.0811058	0.165667	0.0611249	promoter	TraesCS1A02G137500
ATAC	1A:223450107-223450322	ATAC.K2	0.844032	0.324423	0.433282	0.26895	genic	TraesCS1A02G137500
ATAC	1A:223827691-223827805	ATAC.K2	0.663168	0.351458	0.242128	0.256725	genic	TraesCS1A02G137600
ATAC	1A:2238753-2239225	ATAC.K2	1.16557	0.135176	0.318589	0.415649	promoter	TraesCS1A02G003600
ATAC	1A:224814462-224814772	ATAC.K4	0.160768	0.297388	0.751871	0.525674	genic	TraesCS1A02G137800
ATAC	1A:22535725-22536119	ATAC.K2	1.10528	0.162212	0.127436	0.0977998	genic	TraesCS1A02G040900
ATAC	1A:22612286-22612680	ATAC.K4	0.723456	0.594776	1.29984	1.65037	genic	TraesCS1A02G041100
ATAC	1A:22632053-22632329	ATAC.K3	1.24595	1.63563	0.471512	1.39365	promoter	TraesCS1A02G041200
ATAC	1A:22634018-22634493	ATAC.K3	3.5168	3.62273	0.815589	2.8362	promoter	TraesCS1A02G041300
ATAC	1A:22656719-22656797	ATAC.K2	0.663168	0.108141	0.152923	0.158925	promoter	TraesCS1A02G041400
ATAC	1A:22656892-22656960	ATAC.K2	0.422016	0.216282	0.114692	0.0733499	promoter	TraesCS1A02G041400
ATAC	1A:22657261-22657462	ATAC.K2	1.30624	0.189247	0.127436	0.26895	promoter	TraesCS1A02G041400
ATAC	1A:22661000-22661324	ATAC.K2	1.32634	0.527188	0.305846	0.684599	promoter	TraesCS1A02G041600
ATAC	1A:22661552-22661729	ATAC.K2	0.864128	0.567741	0.203897	0.354524	promoter	TraesCS1A02G041600
ATAC	1A:22755299-22755610	ATAC.K4	0.40192	0.270353	0.382307	1.1247	promoter	TraesCS1A02G041700
ATAC	1A:22882233-22882331	ATAC.K2	0.381824	0.135176	0.140179	0.0733499	promoter	TraesCS1A02G042200
ATAC	1A:2291313-2291473	ATAC.K2	0.462208	0.135176	0.152923	0.0855749	promoter	TraesCS1A02G003700
ATAC	1A:23009687-23009892	ATAC.K1	0.180864	0.405529	0.828333	0.513449	promoter	TraesCS1A02G042300
ATAC	1A:230160275-230160730	ATAC.K4	0.663168	0.432564	1.82233	3.82642	genic	TraesCS1A02G138200
ATAC	1A:230165654-230165837	ATAC.K2	1.20576	0.648846	0.560717	0.745724	genic	TraesCS1A02G138200
ATAC	1A:230472652-230472892	ATAC.K4	1.12538	0.770505	2.14092	1.96822	promoter	TraesCS1A02G138300
ATAC	1A:232064079-232064445	ATAC.K2	1.82874	0.270353	0.382307	0.427874	promoter	TraesCS1A02G138400
ATAC	1A:232065140-232065230	ATAC.K2	0.482304	0.270353	0.0509743	0.1467	promoter	TraesCS1A02G138400
ATAC	1A:232065401-232065677	ATAC.K2	0.90432	0.648846	0.547974	0.330074	promoter	TraesCS1A02G138400
ATAC	1A:232087646-232087782	ATAC.K2	1.03494	0.702917	0.369564	0.599024	genic	TraesCS1A02G138500
ATAC	1A:232333285-232333552	ATAC.K4	0.683264	0.702917	1.38905	1.47922	promoter	TraesCS1A02G138600
ATAC	1A:23339139-23339482	ATAC.K2	4.22016	1.75729	0.917538	1.19805	promoter	TraesCS1A02G042700
ATAC	1A:23420485-23420708	ATAC.K1	1.12538	2.62242	3.13492	3.01957	promoter	TraesCS1A02G042800
ATAC	1A:23421140-23421555	ATAC.K1	1.24595	4.06881	4.89353	4.70662	promoter	TraesCS1A02G042800
ATAC	1A:234796227-234796385	ATAC.K2	1.66797	0.865128	0.802845	1.06357	promoter	TraesCS1A02G139200
ATAC	1A:234806329-234806894	ATAC.K4	0.562688	0.675882	1.44002	1.78485	genic	TraesCS1A02G139300
ATAC	1A:234816170-234816652	ATAC.K4	1.72826	1.40583	2.72713	3.22739	promoter	TraesCS1A02G139300
ATAC	1A:235680026-235680262	ATAC.K4	0.120576	0.216282	0.509743	0.586799	genic	TraesCS1A02G139400
ATAC	1A:237329721-237330258	ATAC.K1	2.31104	4.54192	5.22487	5.47679	promoter	TraesCS1A02G139600
ATAC	1A:237520265-237520457	ATAC.K2	1.42682	1.0003	0.688153	0.990223	promoter	TraesCS1A02G139700
ATAC	1A:2378444-2378610	ATAC.K2	0.783744	0.324423	0.101949	0.110025	genic	TraesCS1A02G003800
ATAC	1A:23856346-23856753	ATAC.K4	1.66797	1.96006	4.46025	5.42789	promoter	TraesCS1A02G043100
ATAC	1A:238651821-238652701	ATAC.K4	2.58234	2.94684	5.64541	6.01469	promoter	TraesCS1A02G140600
ATAC	1A:238652839-238653007	ATAC.K2	1.20576	0.621811	0.968512	0.464549	promoter	TraesCS1A02G140600
ATAC	1A:238657281-238657644	ATAC.K4	0.683264	0.473117	1.54197	2.38387	genic	TraesCS1A02G140700
ATAC	1A:238659824-238660161	ATAC.K4	1.08518	0.378494	2.53597	4.26652	genic	TraesCS1A02G140700
ATAC	1A:238667872-238668433	ATAC.K4	5.08429	6.16404	10.3605	14.0954	genic	TraesCS1A02G140700
ATAC	1A:238670040-238670108	ATAC.K4	0.160768	0.486635	0.67541	0.806849	genic	TraesCS1A02G140700
ATAC	1A:238670900-238671329	ATAC.K4	0.542592	0.621811	3.05846	4.38877	promoter	TraesCS1A02G140800
ATAC	1A:238677825-238678165	ATAC.K4	2.5321	1.81136	4.14166	3.89977	genic	TraesCS1A02G140900
ATAC	1A:238873244-238873827	ATAC.K2	28.1947	14.7072	8.75484	5.09782	promoter	TraesCS1A02G141000
ATAC	1A:238999755-239000012	ATAC.K4	1.26605	0.97327	2.01349	2.445	promoter	TraesCS1A02G141100
ATAC	1A:239001286-239001773	ATAC.K4	1.14547	0.892164	3.60643	4.55992	genic	TraesCS1A02G141100
ATAC	1A:239105743-239106074	ATAC.K4	1.14547	1.73026	4.19264	4.22984	genic	TraesCS1A02G141200
ATAC	1A:239106495-239106566	ATAC.K4	0.221056	0.432564	0.751871	0.733499	promoter	TraesCS1A02G141300
ATAC	1A:24075672-24075820	ATAC.K4	0.190912	0.162212	1.47826	1.3203	promoter	TraesCS1A02G043300
ATAC	1A:24075921-24077331	ATAC.K4	2.43162	1.40583	23.5756	22.2128	promoter	TraesCS1A02G043300
ATAC	1A:24132314-24132763	ATAC.K1	0.743552	1.78433	1.72038	2.12715	promoter	TraesCS1A02G043400
ATAC	1A:241377410-241377877	ATAC.K4	0.30144	0.0811058	0.229384	0.733499	promoter	TraesCS1A02G141800
ATAC	1A:242007029-242007175	ATAC.K3	0.361728	0.527188	0.191154	0.0733499	genic	TraesCS1A02G142200
ATAC	1A:242796119-242796332	ATAC.K2	0.321536	0.0811058	0.254872	0.0488999	genic	TraesCS1A02G142300
ATAC	1A:243165242-243165550	ATAC.K3	1.22586	3.19016	2.15366	1.0758	promoter	TraesCS1A02G142400
ATAC	1A:243165573-243165672	ATAC.K3	0.783744	1.04086	0.497	0.317849	promoter	TraesCS1A02G142400
ATAC	1A:24330980-24331100	ATAC.K4	0.20096	0.0540705	0.395051	0.537899	promoter	TraesCS1A02G043800
ATAC	1A:24331367-24331472	ATAC.K2	0.381824	0.135176	0.203897	0.0733499	promoter	TraesCS1A02G043800
ATAC	1A:24331611-24331875	ATAC.K4	0.5024	0.189247	0.993999	1.467	promoter	TraesCS1A02G043800
ATAC	1A:24338656-24338845	ATAC.K2	1.28614	0.351458	0.35682	0.256725	genic	TraesCS1A02G043900
ATAC	1A:243866145-243866435	ATAC.K4	0.341632	0.946234	2.20464	1.956	promoter	TraesCS1A02G142600
ATAC	1A:2442941-2443071	ATAC.K3	0.663168	1.56805	0.497	0.391199	promoter	TraesCS1A02G004000
ATAC	1A:2443492-2443978	ATAC.K3	6.63168	7.56987	2.0772	1.43032	promoter	TraesCS1A02G004000
ATAC	1A:245516555-245517227	ATAC.K2	15.3132	8.84053	7.31481	7.13939	promoter	TraesCS1A02G143000
ATAC	1A:245518979-245519314	ATAC.K3	3.70771	3.6768	1.77136	1.77262	promoter	TraesCS1A02G143000
ATAC	1A:245520017-245520218	ATAC.K2	2.49191	1.62212	0.662666	0.770174	genic	TraesCS1A02G143000
ATAC	1A:245536381-245536485	ATAC.K2	1.44691	0.97327	0.586205	0.501224	promoter	TraesCS1A02G143100
ATAC	1A:246130395-246130612	ATAC.K1	1.08518	2.86574	2.35756	2.6895	promoter	TraesCS1A02G143200
ATAC	1A:246690295-246690508	ATAC.K2	1.54739	0.324423	0.267615	0.330074	genic	TraesCS1A02G143300
ATAC	1A:246693528-246693841	ATAC.K2	4.60199	3.62273	2.53597	1.8582	promoter	TraesCS1A02G143300
ATAC	1A:2472416-2472554	ATAC.K2	0.562688	0.270353	0.114692	0.0855749	promoter	TraesCS1A02G004100
ATAC	1A:2472620-2472724	ATAC.K2	0.482304	0.324423	0.127436	0.0733499	promoter	TraesCS1A02G004100
ATAC	1A:2472918-2473342	ATAC.K2	2.75315	1.86543	1.04497	1.14915	promoter	TraesCS1A02G004100
ATAC	1A:247311140-247311858	ATAC.K3	0.884224	4.43378	2.31933	2.0049	genic	TraesCS1A02G143400
ATAC	1A:2474507-2474769	ATAC.K2	1.64787	0.892164	0.407795	0.22005	promoter	TraesCS1A02G004100
ATAC	1A:248421816-248422294	ATAC.K1	1.74835	3.70383	2.75261	3.01957	promoter	TraesCS1A02G143500
ATAC	1A:248428834-248428966	ATAC.K2	0.723456	0.540705	0.254872	0.415649	genic	TraesCS1A02G143600
ATAC	1A:248428968-248429295	ATAC.K1	1.07514	1.4599	2.67615	1.94377	genic	TraesCS1A02G143600
ATAC	1A:248429552-248429747	ATAC.K1	0.5024	1.08141	1.59295	1.47922	genic	TraesCS1A02G143600
ATAC	1A:248437202-248437542	ATAC.K3	1.46701	6.137	2.62518	2.67727	promoter	TraesCS1A02G143600
ATAC	1A:2489953-2490105	ATAC.K2	0.442112	0.243317	0.0127436	0.0488999	promoter	TraesCS1A02G004126
ATAC	1A:249041597-249042239	ATAC.K4	5.56659	6.16404	11.6221	13.2519	promoter	TraesCS1A02G144000
ATAC	1A:249043076-249043260	ATAC.K2	1.28614	0.486635	0.369564	0.452324	promoter	TraesCS1A02G144000
ATAC	1A:24937496-24937834	ATAC.K1	0.70336	1.18955	1.55472	1.5159	promoter	TraesCS1A02G044100
ATAC	1A:250201669-250201767	ATAC.K4	0.080384	0.0540705	0.254872	0.672374	genic	TraesCS1A02G144400
ATAC	1A:250202415-250202586	ATAC.K2	1.10528	0.243317	0.611692	0.525674	promoter	TraesCS1A02G144400
ATAC	1A:250442528-250442916	ATAC.K4	0.622976	0.405529	3.35156	2.95844	genic	TraesCS1A02G144500
ATAC	1A:250443922-250444736	ATAC.K4	1.96941	2.24393	10.8193	10.8925	promoter	TraesCS1A02G144500
ATAC	1A:250527889-250528485	ATAC.K4	0.622976	0.648846	1.72038	1.467	promoter	TraesCS1A02G144600
ATAC	1A:250554148-250554904	ATAC.K4	2.57229	1.94654	4.28184	4.13204	genic	TraesCS1A02G144700
ATAC	1A:251018154-251018852	ATAC.K4	0.381824	0.378494	0.751871	1.01467	genic	TraesCS1A02G144800
ATAC	1A:251376577-251376724	ATAC.K2	0.723456	0.243317	0.229384	0.158925	promoter	TraesCS1A02G145300
ATAC	1A:251565677-251565791	ATAC.K4	0.663168	1.21659	1.36356	1.74817	promoter	TraesCS1A02G145500
ATAC	1A:251690017-251690206	ATAC.K1	0.643072	0.675882	1.5802	0.733499	promoter	TraesCS1A02G145600
ATAC	1A:251935143-251935362	ATAC.K2	0.884224	0.189247	0.229384	0.1956	promoter	TraesCS1A02G145700
ATAC	1A:252326560-252326679	ATAC.K3	0.180864	0.270353	0.17841	0.012225	promoter	TraesCS1A02G146000
ATAC	1A:252503529-252503722	ATAC.K4	0.010048	0.0540705	0.0254872	0.378974	genic	TraesCS1A02G146200
ATAC	1A:252771937-252772007	ATAC.K2	0.663168	0.216282	0.203897	0.330074	promoter	TraesCS1A02G146500
ATAC	1A:252829513-252829781	ATAC.K1	0.542592	1.40583	1.33808	1.77262	promoter	TraesCS1A02G146600
ATAC	1A:253015856-253015991	ATAC.K2	0.823936	0.324423	0.471512	0.26895	genic	TraesCS1A02G146700
ATAC	1A:253372294-253372687	ATAC.K1	0.140672	0.216282	0.624435	0.305624	promoter	TraesCS1A02G146800
ATAC	1A:253720304-253720535	ATAC.K1	1.42682	3.92011	3.72112	4.75552	promoter	TraesCS1A02G147000
ATAC	1A:253721739-253722501	ATAC.K1	0.964609	2.7576	2.49774	2.70172	genic	TraesCS1A02G147000
ATAC	1A:253728887-253729872	ATAC.K2	7.13408	4.73117	3.54271	4.07092	genic	TraesCS1A02G147100
ATAC	1A:254180570-254180819	ATAC.K2	0.984705	0.351458	0.203897	0.26895	promoter	TraesCS1A02G147200
ATAC	1A:254182611-254182990	ATAC.K2	1.74835	0.784023	0.471512	0.366749	promoter	TraesCS1A02G147200
ATAC	1A:254349221-254349520	ATAC.K3	5.64698	7.92133	3.54271	2.93399	promoter	TraesCS1A02G147300
ATAC	1A:254350830-254351047	ATAC.K2	4.22016	2.298	1.15967	0.733499	promoter	TraesCS1A02G147300
ATAC	1A:254351645-254352118	ATAC.K2	5.82784	2.67649	2.14092	1.87042	genic	TraesCS1A02G147300
ATAC	1A:254374747-254375038	ATAC.K2	1.08518	0.675882	0.509743	0.696824	promoter	TraesCS1A02G147400
ATAC	1A:254382801-254382965	ATAC.K1	0.281344	0.702917	0.943025	0.440099	genic	TraesCS1A02G147400
ATAC	1A:254383394-254383569	ATAC.K1	0.241152	0.567741	0.598948	0.782399	genic	TraesCS1A02G147500
ATAC	1A:254992976-254993343	ATAC.K1	0.643072	1.32473	1.55472	1.19805	promoter	TraesCS1A02G147600
ATAC	1A:25538895-25539431	ATAC.K4	3.85843	6.21811	8.74209	8.89978	promoter	TraesCS1A02G044500
ATAC	1A:25545129-25545964	ATAC.K4	1.06509	1.35176	2.39579	2.2983	promoter	TraesCS1A02G044600
ATAC	1A:255478651-255479162	ATAC.K1	0.643072	1.70322	2.17915	1.956	promoter	TraesCS1A02G148000
ATAC	1A:255488211-255489094	ATAC.K1	1.36653	2.21689	3.23687	2.32275	genic	TraesCS1A02G148000
ATAC	1A:255701397-255701645	ATAC.K4	0.020096	0.108141	0.0509743	0.26895	promoter	TraesCS1A02G148100
ATAC	1A:255871866-255872160	ATAC.K4	0.120576	0.162212	0.560717	0.684599	promoter	TraesCS1A02G148300
ATAC	1A:255899960-255900267	ATAC.K1	2.21056	5.94776	4.93176	5.51347	promoter	TraesCS1A02G148400
ATAC	1A:25680147-25680366	ATAC.K4	0.663168	0.675882	1.22338	1.77262	promoter	TraesCS1A02G044700
ATAC	1A:256809923-256810161	ATAC.K2	1.06509	0.540705	0.53523	0.513449	promoter	TraesCS1A02G149100
ATAC	1A:256819110-256819445	ATAC.K1	2.80339	4.82579	6.81781	5.96579	promoter	TraesCS1A02G149200
ATAC	1A:256919990-256920551	ATAC.K4	0.683264	0.108141	1.07046	0.806849	genic	TraesCS1A02G149400
ATAC	1A:256922615-256922746	ATAC.K2	0.643072	0.0540705	0.267615	0.232275	genic	TraesCS1A02G149400
ATAC	1A:256927535-256927698	ATAC.K2	0.60288	0.135176	0.216641	0.232275	genic	TraesCS1A02G149400
ATAC	1A:256928883-256929032	ATAC.K4	0.5024	0.189247	0.904794	0.941323	promoter	TraesCS1A02G149400
ATAC	1A:256929416-256929908	ATAC.K4	2.31104	2.62242	6.47374	6.17361	promoter	TraesCS1A02G149400
ATAC	1A:256964170-256964483	ATAC.K4	1.0048	0.405529	1.68215	1.4181	promoter	TraesCS1A02G149500
ATAC	1A:256967274-256967742	ATAC.K2	1.5072	0.243317	0.522487	0.342299	genic	TraesCS1A02G149500
ATAC	1A:256985205-256985601	ATAC.K4	0.90432	0.486635	1.26161	2.07825	promoter	TraesCS1A02G149600
ATAC	1A:25701185-25701616	ATAC.K1	2.39143	4.97449	3.78484	3.42299	promoter	TraesCS1A02G044800
ATAC	1A:25709840-25710262	ATAC.K4	0.844032	1.62212	4.28184	5.92911	promoter	TraesCS1A02G044900
ATAC	1A:257414656-257415472	ATAC.K2	22.186	9.92194	14.1836	10.4035	promoter	TraesCS1A02G149700
ATAC	1A:257552105-257552567	ATAC.K4	0.361728	0.51367	0.993999	0.941323	promoter	TraesCS1A02G149800
ATAC	1A:257574629-257575241	ATAC.K2	9.0834	5.88017	6.66489	4.73107	promoter	TraesCS1A02G150100
ATAC	1A:25790960-25791285	ATAC.K4	0.180864	0.162212	0.35682	0.672374	promoter	TraesCS1A02G045000
ATAC	1A:258157398-258158175	ATAC.K4	1.66797	3.00091	7.40402	8.81421	promoter	TraesCS1A02G150400
ATAC	1A:258161922-258162141	ATAC.K2	2.0297	0.351458	0.71364	0.684599	genic	TraesCS1A02G150400
ATAC	1A:258182726-258182827	ATAC.K1	0.120576	0.51367	0.484256	0.623474	promoter	TraesCS1A02G150500
ATAC	1A:258743866-258743975	ATAC.K4	0.180864	0.216282	0.624435	0.452324	promoter	TraesCS1A02G150700
ATAC	1A:258745938-258746216	ATAC.K4	1.06509	0.405529	2.54872	2.18827	genic	TraesCS1A02G150700
ATAC	1A:258860790-258861341	ATAC.K4	0.864128	0.270353	1.63118	4.97557	genic	TraesCS1A02G150800
ATAC	1A:258862436-258862513	ATAC.K2	0.462208	0.121659	0.127436	0.207825	promoter	TraesCS1A02G150800
ATAC	1A:258862619-258863019	ATAC.K3	1.80864	1.8384	0.751871	0.513449	promoter	TraesCS1A02G150800
ATAC	1A:258874484-258874884	ATAC.K3	4.13978	4.62303	0.943025	0.684599	genic	TraesCS1A02G150900
ATAC	1A:258875309-258875380	ATAC.K2	0.40192	0.297388	0.0509743	0.02445	genic	TraesCS1A02G150900
ATAC	1A:258879855-258880027	ATAC.K2	0.864128	0.189247	0.203897	0.317849	genic	TraesCS1A02G150900
ATAC	1A:258880063-258880769	ATAC.K2	4.68237	1.78433	1.56746	1.39365	genic	TraesCS1A02G150900
ATAC	1A:258881087-258881290	ATAC.K2	1.12538	0.297388	0.127436	0.1467	promoter	TraesCS1A02G150900
ATAC	1A:259045839-259046251	ATAC.K2	2.89383	2.18986	1.45277	0.696824	promoter	TraesCS1A02G151000
ATAC	1A:259048904-259049139	ATAC.K1	0.381824	0.729952	1.36356	0.929098	promoter	TraesCS1A02G151000
ATAC	1A:259998340-259998575	ATAC.K1	0.381824	1.08141	1.63118	1.45477	promoter	TraesCS1A02G151400
ATAC	1A:260839744-260840101	ATAC.K4	0.823936	0.702917	2.43402	2.6895	genic	TraesCS1A02G151600
ATAC	1A:260840294-260841166	ATAC.K4	2.21056	2.40614	6.6394	7.34721	promoter	TraesCS1A02G151700
ATAC	1A:261136210-261136479	ATAC.K4	0.140672	0.351458	0.484256	0.684599	genic	TraesCS1A02G152000
ATAC	1A:261826696-261826883	ATAC.K2	0.924416	0.486635	0.497	0.2445	promoter	TraesCS1A02G152200
ATAC	1A:262008332-262008395	ATAC.K2	0.542592	0.459599	0.17841	0.0855749	promoter	TraesCS1A02G152300
ATAC	1A:262009111-262009588	ATAC.K2	2.99431	0.554223	0.879307	0.904648	promoter	TraesCS1A02G152300
ATAC	1A:262014900-262015134	ATAC.K1	0.944512	1.59508	2.23013	1.58925	genic	TraesCS1A02G152300
ATAC	1A:262825410-262825620	ATAC.K1	0.040192	0.297388	0.395051	0.354524	genic	TraesCS1A02G152500
ATAC	1A:262825908-262826117	ATAC.K1	0.10048	0.351458	0.280359	0.464549	genic	TraesCS1A02G152500
ATAC	1A:262841042-262841406	ATAC.K1	0.30144	0.770505	1.12143	1.0758	genic	TraesCS1A02G152500
ATAC	1A:264214545-264214747	ATAC.K4	0.060288	0.0540705	0.67541	0.745724	genic	TraesCS1A02G152800
ATAC	1A:2647155-2647296	ATAC.K2	0.643072	0.540705	0.203897	0.012225	genic	TraesCS1A02G004400
ATAC	1A:2647841-2648292	ATAC.K3	2.39143	4.75821	1.80959	0.391199	promoter	TraesCS1A02G004400
ATAC	1A:2648384-2648666	ATAC.K2	2.18042	1.3788	0.522487	0.1467	promoter	TraesCS1A02G004400
ATAC	1A:265040315-265040620	ATAC.K4	1.28614	0.405529	1.13418	1.28362	genic	TraesCS1A02G153000
ATAC	1A:265040729-265040825	ATAC.K2	0.562688	0.0811058	0.254872	0.1956	genic	TraesCS1A02G153000
ATAC	1A:265040944-265041174	ATAC.K2	1.5273	0.108141	0.790102	0.794624	promoter	TraesCS1A02G153000
ATAC	1A:265041319-265041714	ATAC.K4	0.562688	0.216282	1.21064	1.5648	promoter	TraesCS1A02G153000
ATAC	1A:265645217-265645606	ATAC.K4	1.5273	0.594776	2.7781	3.17849	genic	TraesCS1A02G153100
ATAC	1A:265647358-265647697	ATAC.K4	0.462208	0.608293	2.2811	1.84597	genic	TraesCS1A02G153100
ATAC	1A:265648126-265648233	ATAC.K4	0.5024	0.784023	1.54197	1.19805	genic	TraesCS1A02G153100
ATAC	1A:2667057-2667632	ATAC.K3	1.12538	1.64915	0.751871	0.317849	promoter	TraesCS1A02G004500
ATAC	1A:2668426-2668955	ATAC.K3	1.26605	1.24362	0.318589	0.293399	promoter	TraesCS1A02G004500
ATAC	1A:267181040-267181223	ATAC.K2	1.66797	0.97327	0.968512	0.831299	promoter	TraesCS1A02G153600
ATAC	1A:267356139-267356544	ATAC.K2	1.60768	0.594776	1.35082	1.13692	promoter	TraesCS1A02G153800
ATAC	1A:267882881-267883317	ATAC.K1	2.15027	4.27157	5.18664	5.13449	promoter	TraesCS1A02G154000
ATAC	1A:268123953-268124323	ATAC.K1	1.5273	2.73056	3.42802	2.3961	promoter	TraesCS1A02G154100
ATAC	1A:268390282-268390965	ATAC.K1	0.341632	0.594776	1.21064	0.745724	genic	TraesCS1A02G154200
ATAC	1A:268929761-268929969	ATAC.K2	1.30624	0.662364	1.07046	0.623474	genic	TraesCS1A02G154300
ATAC	1A:269582575-269583008	ATAC.K1	1.94931	3.32534	4.3583	3.60637	promoter	TraesCS1A02G154600
ATAC	1A:26964460-26964614	ATAC.K4	0.10048	0.581258	0.981256	1.0758	promoter	TraesCS1A02G045300
ATAC	1A:26965197-26965401	ATAC.K4	0.140672	0.256835	0.497	1.00245	promoter	TraesCS1A02G045300
ATAC	1A:26971200-26971410	ATAC.K1	0.823936	1.86543	2.51048	2.33497	promoter	TraesCS1A02G045400
ATAC	1A:269993701-269994261	ATAC.K1	0.864128	1.56805	2.56146	1.83375	promoter	TraesCS1A02G154700
ATAC	1A:270008311-270008900	ATAC.K1	0.261248	0.946234	1.00674	0.990223	genic	TraesCS1A02G154700
ATAC	1A:271891322-271891680	ATAC.K1	1.5072	3.37941	3.88679	3.55747	promoter	TraesCS1A02G155000
ATAC	1A:27248383-27248782	ATAC.K2	10.0882	8.11058	3.95051	3.65527	promoter	TraesCS1A02G045700
ATAC	1A:27257092-27257710	ATAC.K3	7.536	14.0178	3.479	2.55502	promoter	TraesCS1A02G045800
ATAC	1A:27258106-27258368	ATAC.K3	1.80864	4.08232	2.00074	1.91932	promoter	TraesCS1A02G045800
ATAC	1A:27260086-27260191	ATAC.K2	0.663168	0.364976	0.344077	0.1956	genic	TraesCS1A02G045800
ATAC	1A:272613170-272613286	ATAC.K4	0.20096	0.486635	0.943025	1.11247	genic	TraesCS1A02G155200
ATAC	1A:272986904-272986992	ATAC.K2	0.20096	0.0811058	0.0127436	0.0366749	promoter	TraesCS1A02G155300
ATAC	1A:27327231-27327882	ATAC.K2	1.38662	0.97327	0.446025	0.513449	genic	TraesCS1A02G046000
ATAC	1A:275763524-275764162	ATAC.K4	1.58758	1.64915	3.67015	3.49634	promoter	TraesCS1A02G155700
ATAC	1A:276259432-276259697	ATAC.K4	0.160768	0.0270353	0.53523	1.10025	promoter	TraesCS1A02G155800
ATAC	1A:276324119-276324502	ATAC.K1	2.47181	4.54192	5.33956	5.57459	promoter	TraesCS1A02G155900
ATAC	1A:276568965-276569461	ATAC.K4	3.13498	4.39323	7.62066	7.24941	promoter	TraesCS1A02G156000
ATAC	1A:276802980-276803357	ATAC.K3	4.50151	5.70444	2.2811	2.17605	genic	TraesCS1A02G156100
ATAC	1A:276803532-276803997	ATAC.K4	0.783744	1.05438	5.41602	5.19562	genic	TraesCS1A02G156100
ATAC	1A:276804931-276805051	ATAC.K2	0.944512	0.621811	0.293102	0.415649	genic	TraesCS1A02G156100
ATAC	1A:276865041-276865450	ATAC.K4	2.49191	4.37971	5.19938	6.67484	promoter	TraesCS1A02G156200
ATAC	1A:277073690-277074061	ATAC.K1	0.90432	2.1493	2.30659	2.42055	promoter	TraesCS1A02G156400
ATAC	1A:277074518-277074802	ATAC.K3	3.13498	3.59569	1.63118	1.77262	promoter	TraesCS1A02G156400
ATAC	1A:277075423-277076289	ATAC.K1	1.72826	3.32534	4.65141	4.60882	genic	TraesCS1A02G156400
ATAC	1A:27752684-27752892	ATAC.K1	0.381824	0.702917	1.01949	0.819074	promoter	TraesCS1A02G046300
ATAC	1A:277641300-277642300	ATAC.K1	6.73216	10.5167	17.1656	14.4988	genic	TraesCS1A02G156500
ATAC	1A:277642418-277642854	ATAC.K1	0.381824	2.78463	5.28858	3.81419	genic	TraesCS1A02G156500
ATAC	1A:278521557-278521864	ATAC.K4	0.010048	0.0270353	0.331333	0.256725	promoter	TraesCS1A02G156900
ATAC	1A:278990-279181	ATAC.K1	0.341632	1.51397	1.37631	0.953548	genic	TraesCS1A02G001100
ATAC	1A:279906595-279906860	ATAC.K3	2.77325	2.89277	1.46551	1.89487	genic	TraesCS1A02G157700
ATAC	1A:279906969-279907844	ATAC.K4	6.37044	8.94867	16.5539	14.5599	genic	TraesCS1A02G157700
ATAC	1A:280602756-280603439	ATAC.K4	1.76845	3.46051	6.91976	6.85821	genic	TraesCS1A02G157900
ATAC	1A:281887475-281887755	ATAC.K4	0.10048	0.216282	0.458769	0.537899	genic	TraesCS1A02G158400
ATAC	1A:282554612-282554762	ATAC.K4	0.060288	0.0270353	0.203897	0.464549	genic	TraesCS1A02G158600
ATAC	1A:28364598-28364979	ATAC.K2	3.87853	2.24393	1.32533	1.0269	promoter	TraesCS1A02G046400
ATAC	1A:28367659-28367878	ATAC.K1	1.94931	5.51519	4.05246	4.37654	promoter	TraesCS1A02G046400
ATAC	1A:284320278-284320469	ATAC.K4	0.241152	0.216282	0.688153	0.782399	promoter	TraesCS1A02G159000
ATAC	1A:285980489-285980992	ATAC.K1	0.964609	2.298	2.82907	2.46945	promoter	TraesCS1A02G159500
ATAC	1A:286006402-286006517	ATAC.K4	0.060288	0.243317	0.688153	0.537899	promoter	TraesCS1A02G159600
ATAC	1A:286007590-286007759	ATAC.K4	0.120576	0.135176	0.943025	0.843524	genic	TraesCS1A02G159600
ATAC	1A:286008220-286008605	ATAC.K4	0.120576	0.189247	3.08395	3.58192	genic	TraesCS1A02G159600
ATAC	1A:286008802-286009029	ATAC.K4	0.020096	0.189247	0.981256	1.3692	genic	TraesCS1A02G159600
ATAC	1A:28627210-28627452	ATAC.K3	1.18566	2.08172	1.04497	0.757949	promoter	TraesCS1A02G046700
ATAC	1A:28628898-28629067	ATAC.K4	0.080384	0.243317	0.509743	0.733499	promoter	TraesCS1A02G046700
ATAC	1A:28716087-28716209	ATAC.K2	1.86893	1.56805	0.841076	1.00245	genic	TraesCS1A02G046900
ATAC	1A:28757476-28757825	ATAC.K2	1.56749	1.10845	0.815589	1.0269	genic	TraesCS1A02G047000
ATAC	1A:287701941-287702420	ATAC.K4	0.743552	1.51397	2.01349	2.51835	promoter	TraesCS1A02G160500
ATAC	1A:289329719-289330060	ATAC.K1	0.884224	1.55453	2.20464	1.60147	promoter	TraesCS1A02G160800
ATAC	1A:289350904-289351245	ATAC.K4	0.281344	0.0540705	0.420538	1.14915	genic	TraesCS1A02G161000
ATAC	1A:289631180-289631496	ATAC.K4	1.18566	0.756987	2.00074	2.7384	genic	TraesCS1A02G161100
ATAC	1A:289632165-289632247	ATAC.K2	0.522496	0.0540705	0.0382307	0.02445	genic	TraesCS1A02G161100
ATAC	1A:289633694-289634473	ATAC.K2	8.31975	2.62242	3.44077	2.56725	promoter	TraesCS1A02G161100
ATAC	1A:290121500-290121617	ATAC.K2	0.30144	0.0811058	0.0509743	0.02445	promoter	TraesCS1A02G161200
ATAC	1A:290122141-290122509	ATAC.K2	1.08518	0.108141	0.0127436	0.0733499	promoter	TraesCS1A02G161200
ATAC	1A:290202778-290203147	ATAC.K4	0.582784	0.162212	0.777358	1.13692	genic	TraesCS1A02G161400
ATAC	1A:290555107-290555363	ATAC.K4	0.080384	0.405529	1.29984	1.14915	genic	TraesCS1A02G161900
ATAC	1A:291241678-291242240	ATAC.K4	1.68806	2.35207	4.17989	3.19072	promoter	TraesCS1A02G162200
ATAC	1A:291560683-291561414	ATAC.K2	4.09959	2.35207	1.63118	1.49145	genic	TraesCS1A02G162400
ATAC	1A:291974138-291974333	ATAC.K2	0.442112	0.351458	0.114692	0.26895	promoter	TraesCS1A02G162500
ATAC	1A:292022107-292022517	ATAC.K1	0.422016	0.892164	1.33808	1.05135	promoter	TraesCS1A02G162600
ATAC	1A:292077282-292077924	ATAC.K1	0.663168	1.35176	1.86056	1.91932	promoter	TraesCS1A02G162700
ATAC	1A:292089806-292090269	ATAC.K1	2.45171	4.29861	7.03446	4.68217	promoter	TraesCS1A02G162800
ATAC	1A:292746186-292746850	ATAC.K4	1.12538	1.54101	2.6889	4.07092	promoter	TraesCS1A02G163000
ATAC	1A:292773768-292774304	ATAC.K2	0.622976	0.405529	0.254872	0.22005	genic	TraesCS1A02G163100
ATAC	1A:29279743-29280319	ATAC.K3	3.25555	10.2464	4.65141	3.37409	promoter	TraesCS1A02G047400
ATAC	1A:292881580-292881948	ATAC.K1	0.864128	1.94654	2.63792	2.01712	promoter	TraesCS1A02G163200
ATAC	1A:293707510-293708106	ATAC.K1	0.462208	1.13548	1.40179	1.1247	promoter	TraesCS1A02G163400
ATAC	1A:293722167-293722286	ATAC.K4	0.080384	0.243317	0.586205	0.476774	genic	TraesCS1A02G163400
ATAC	1A:293722846-293722982	ATAC.K1	0.160768	0.581258	0.395051	0.623474	genic	TraesCS1A02G163400
ATAC	1A:296215367-296215527	ATAC.K1	0.241152	0.594776	0.764615	0.745724	promoter	TraesCS1A02G164400
ATAC	1A:297374419-297374542	ATAC.K3	0.241152	0.865128	0.191154	0.12225	promoter	TraesCS1A02G164600
ATAC	1A:297374825-297374905	ATAC.K3	0.482304	0.594776	0.203897	0.12225	promoter	TraesCS1A02G164600
ATAC	1A:297696559-297696699	ATAC.K3	0.080384	0.594776	0.0509743	0.17115	genic	TraesCS1A02G164700
ATAC	1A:297748426-297748573	ATAC.K2	1.0249	0.865128	0.739128	0.415649	genic	TraesCS1A02G164800
ATAC	1A:297749508-297750153	ATAC.K4	1.94931	3.94715	7.51871	6.71151	genic	TraesCS1A02G164800
ATAC	1A:297874291-297874549	ATAC.K4	0.924416	0.648846	1.38905	2.0049	promoter	TraesCS1A02G164900
ATAC	1A:297882685-297883272	ATAC.K4	0.321536	0.243317	0.930281	1.19805	promoter	TraesCS1A02G165000
ATAC	1A:297883388-297883625	ATAC.K2	0.562688	0.0946234	0.17841	0.110025	promoter	TraesCS1A02G165000
ATAC	1A:29788837-29789017	ATAC.K2	0.422016	0.270353	0.17841	0.0977998	genic	TraesCS1A02G047700
ATAC	1A:29796252-29796449	ATAC.K1	0.20096	0.959752	1.01949	0.635699	promoter	TraesCS1A02G048000
ATAC	1A:29799262-29799817	ATAC.K1	0.281344	4.2175	3.31333	3.63082	promoter	TraesCS1A02G048100
ATAC	1A:298106174-298106327	ATAC.K4	0.984705	0.865128	2.17915	2.40832	genic	TraesCS1A02G165400
ATAC	1A:298106984-298107503	ATAC.K2	11.8566	10.0706	5.32682	3.47189	promoter	TraesCS1A02G165400
ATAC	1A:298115880-298116108	ATAC.K4	0.180864	0.243317	0.930281	0.880198	genic	TraesCS1A02G165500
ATAC	1A:298153481-298153560	ATAC.K2	0.180864	0.0270353	0.101949	0.012225	genic	TraesCS1A02G165600
ATAC	1A:2981734-2981816	ATAC.K2	0.60288	0.162212	0.0254872	0.0977998	promoter	TraesCS1A02G005100
ATAC	1A:298615326-298615862	ATAC.K4	0.482304	0.702917	1.80959	1.73595	promoter	TraesCS1A02G165900
ATAC	1A:299425197-299425431	ATAC.K4	0.060288	0.135176	0.458769	0.586799	genic	TraesCS1A02G166600
ATAC	1A:299425829-299426581	ATAC.K4	0.844032	2.23041	2.65066	4.00979	promoter	TraesCS1A02G166600
ATAC	1A:299717151-299717780	ATAC.K4	0.80384	0.621811	1.97525	1.11247	promoter	TraesCS1A02G167000
ATAC	1A:300002500-300002733	ATAC.K2	1.90912	0.51367	0.395051	0.427874	promoter	TraesCS1A02G167100
ATAC	1A:300003065-300003147	ATAC.K2	0.673216	0.189247	0.089205	0.22005	promoter	TraesCS1A02G167100
ATAC	1A:300003222-300003827	ATAC.K2	10.3494	5.56926	6.01497	4.80442	promoter	TraesCS1A02G167100
ATAC	1A:300100608-300100922	ATAC.K1	0.80384	1.40583	2.17915	1.7115	promoter	TraesCS1A02G167200
ATAC	1A:300106818-300107183	ATAC.K1	1.24595	2.73056	4.10343	2.89732	promoter	TraesCS1A02G167300
ATAC	1A:300396059-300396279	ATAC.K4	0.180864	0.243317	0.904794	0.965773	promoter	TraesCS1A02G167600
ATAC	1A:300397810-300397942	ATAC.K4	0.020096	0.0270353	0.203897	0.415649	promoter	TraesCS1A02G167600
ATAC	1A:300567399-300567601	ATAC.K2	0.924416	0.51367	0.344077	0.525674	promoter	TraesCS1A02G167700
ATAC	1A:300568056-300568257	ATAC.K2	0.70336	0.324423	0.229384	0.415649	genic	TraesCS1A02G167700
ATAC	1A:300576816-300577083	ATAC.K2	0.5024	0.108141	0.140179	0.2445	promoter	TraesCS1A02G167800
ATAC	1A:300673155-300673467	ATAC.K2	0.442112	0.0270353	0.0764615	0.366749	genic	TraesCS1A02G167900
ATAC	1A:300857628-300857883	ATAC.K4	0.30144	0.108141	0.751871	0.513449	genic	TraesCS1A02G168100
ATAC	1A:300859327-300859408	ATAC.K2	0.361728	0.135176	0.17841	0.0488999	genic	TraesCS1A02G168100
ATAC	1A:300860010-300860233	ATAC.K2	2.0297	1.27066	0.700897	0.684599	promoter	TraesCS1A02G168100
ATAC	1A:300927186-300927306	ATAC.K2	0.40192	0.297388	0.331333	0.0977998	promoter	TraesCS1A02G168200
ATAC	1A:300944587-300944894	ATAC.K4	0.241152	0.405529	0.407795	0.794624	genic	TraesCS1A02G168300
ATAC	1A:301157344-301157481	ATAC.K2	0.422016	0.0811058	0.0254872	0.1956	promoter	TraesCS1A02G168500
ATAC	1A:301157768-301157840	ATAC.K2	0.422016	0.108141	0.0764615	0.0977998	promoter	TraesCS1A02G168500
ATAC	1A:301158831-301159311	ATAC.K4	3.35603	1.40583	3.05846	3.34964	genic	TraesCS1A02G168500
ATAC	1A:301201570-301201925	ATAC.K2	2.45171	0.919199	1.66941	1.06357	promoter	TraesCS1A02G168600
ATAC	1A:30179425-30179603	ATAC.K1	0.964609	2.08172	2.59969	2.3472	promoter	TraesCS1A02G048600
ATAC	1A:301864155-301864552	ATAC.K1	0.823936	1.89247	2.33207	2.53057	promoter	TraesCS1A02G169100
ATAC	1A:301892820-301892900	ATAC.K2	0.281344	0.189247	0.0764615	0.02445	promoter	TraesCS1A02G169200
ATAC	1A:301896141-301896306	ATAC.K1	0.040192	0.432564	0.53523	0.770174	genic	TraesCS1A02G169300
ATAC	1A:302199633-302200081	ATAC.K4	1.18566	0.486635	2.1919	2.5428	genic	TraesCS1A02G169500
ATAC	1A:302200666-302201250	ATAC.K4	3.27565	2.21689	6.07869	6.84599	promoter	TraesCS1A02G169500
ATAC	1A:30271508-30271798	ATAC.K3	1.5273	3.40644	1.6949	1.47922	promoter	TraesCS1A02G048800
ATAC	1A:302957649-302958052	ATAC.K1	2.29095	4.27157	5.98948	5.53792	genic	TraesCS1A02G169900
ATAC	1A:30296459-30296607	ATAC.K4	0.080384	0.135176	0.739128	0.342299	promoter	TraesCS1A02G048900
ATAC	1A:303727306-303727700	ATAC.K3	2.57229	2.56835	1.82233	1.10025	genic	TraesCS1A02G170000
ATAC	1A:303728074-303728256	ATAC.K2	1.5072	1.08141	0.841076	0.1956	genic	TraesCS1A02G170000
ATAC	1A:304036055-304036452	ATAC.K4	0.140672	0.189247	0.879307	0.464549	promoter	TraesCS1A02G170300
ATAC	1A:305006289-305006561	ATAC.K1	0.422016	1.18955	0.879307	1.45477	promoter	TraesCS1A02G170600
ATAC	1A:305007258-305007758	ATAC.K3	1.76845	1.78433	0.930281	0.880198	promoter	TraesCS1A02G170600
ATAC	1A:305329189-305329990	ATAC.K4	0.944512	1.02734	2.15366	3.27629	promoter	TraesCS1A02G170700
ATAC	1A:305335893-305336147	ATAC.K1	0.723456	1.51397	1.60569	0.806849	promoter	TraesCS1A02G170800
ATAC	1A:305369171-305369308	ATAC.K3	0.643072	1.89247	0.815589	0.709049	promoter	TraesCS1A02G170900
ATAC	1A:305606089-305606432	ATAC.K2	1.74835	1.04086	0.904794	0.709049	promoter	TraesCS1A02G171000
ATAC	1A:30638263-30638679	ATAC.K4	3.49671	5.56926	5.83656	8.00736	promoter	TraesCS1A02G049000
ATAC	1A:307033450-307033786	ATAC.K1	1.42682	2.8387	3.65741	3.61859	promoter	TraesCS1A02G171700
ATAC	1A:30772210-30772426	ATAC.K2	1.28614	0.865128	0.458769	0.2445	genic	TraesCS1A02G049100
ATAC	1A:30773017-30773530	ATAC.K3	3.21536	6.3668	1.79684	2.57947	promoter	TraesCS1A02G049100
ATAC	1A:30788990-30789152	ATAC.K3	0.542592	2.10875	0.879307	0.342299	promoter	TraesCS1A02G049200
ATAC	1A:308810548-308811181	ATAC.K4	0.462208	0.378494	5.61992	5.70907	promoter	TraesCS1A02G173000
ATAC	1A:308811436-308812037	ATAC.K4	1.70816	0.97327	5.17389	4.80442	promoter	TraesCS1A02G173000
ATAC	1A:309758187-309758553	ATAC.K1	1.60768	2.81167	3.89953	3.45967	promoter	TraesCS1A02G173700
ATAC	1A:309789215-309789509	ATAC.K2	0.90432	0.648846	0.382307	0.464549	promoter	TraesCS1A02G173800
ATAC	1A:309791313-309791755	ATAC.K2	1.44691	1.0003	0.573461	0.660149	genic	TraesCS1A02G173800
ATAC	1A:310246169-310246260	ATAC.K2	0.582784	0.378494	0.305846	0.1956	genic	TraesCS1A02G174000
ATAC	1A:310254321-310254468	ATAC.K2	0.572736	0.162212	0.165667	0.22005	genic	TraesCS1A02G174000
ATAC	1A:3116226-3116521	ATAC.K3	2.77325	2.97388	1.47826	0.660149	promoter	TraesCS1A02G005400
ATAC	1A:311816337-311816826	ATAC.K1	1.0249	1.97357	3.02023	2.88509	promoter	TraesCS1A02G174500
ATAC	1A:311852645-311853045	ATAC.K1	0.241152	0.838093	1.24887	1.0269	promoter	TraesCS1A02G174600
ATAC	1A:3121429-3121687	ATAC.K4	0.261248	0.405529	1.31259	1.24695	genic	TraesCS1A02G005500
ATAC	1A:312161738-312162115	ATAC.K4	0.281344	0.243317	1.01949	1.77262	promoter	TraesCS1A02G174700
ATAC	1A:31254552-31255016	ATAC.K3	2.90387	4.87987	2.485	1.8582	promoter	TraesCS1A02G049600
ATAC	1A:312583056-312583902	ATAC.K4	3.0144	1.81136	5.69638	3.25184	promoter	TraesCS1A02G174800
ATAC	1A:312609794-312610354	ATAC.K2	6.26996	1.41935	1.03223	0.953548	promoter	TraesCS1A02G174900
ATAC	1A:312771613-312771905	ATAC.K4	0.70336	0.756987	2.24287	1.99267	promoter	TraesCS1A02G175000
ATAC	1A:312776614-312777643	ATAC.K4	0.924416	0.811058	2.15366	1.7604	genic	TraesCS1A02G175000
ATAC	1A:313161262-313161489	ATAC.K2	0.783744	0.202764	0.127436	0.0488999	genic	TraesCS1A02G175200
ATAC	1A:313162221-313162286	ATAC.K2	0.341632	0.0270353	0.0254872	0.110025	promoter	TraesCS1A02G175200
ATAC	1A:313164639-313164849	ATAC.K3	0.622976	0.621811	0.0764615	0.0977998	promoter	TraesCS1A02G175200
ATAC	1A:313489007-313489462	ATAC.K1	5.36563	12.639	11.2781	6.98046	promoter	TraesCS1A02G175500
ATAC	1A:313490436-313491718	ATAC.K1	2.37133	11.9766	9.27732	7.50614	genic	TraesCS1A02G175500
ATAC	1A:313590312-313590562	ATAC.K1	0.844032	1.8384	1.94977	1.28362	promoter	TraesCS1A02G175600
ATAC	1A:313754472-313754774	ATAC.K2	0.844032	0.540705	0.331333	0.440099	promoter	TraesCS1A02G175700
ATAC	1A:314511283-314511599	ATAC.K1	0.30144	1.02734	1.32533	1.33252	promoter	TraesCS1A02G176200
ATAC	1A:314622014-314622528	ATAC.K1	0.221056	1.58156	0.993999	0.647924	genic	TraesCS1A02G176300
ATAC	1A:314623899-314623980	ATAC.K3	0.080384	0.459599	0.17841	0.0366749	promoter	TraesCS1A02G176300
ATAC	1A:315839199-315839768	ATAC.K1	1.04499	2.08172	3.00748	2.92177	genic	TraesCS1A02G176500
ATAC	1A:317808680-317808778	ATAC.K3	0.221056	0.946234	0.586205	0.134475	promoter	TraesCS1A02G176700
ATAC	1A:317810403-317811009	ATAC.K1	2.37133	4.51489	9.40476	6.89489	promoter	TraesCS1A02G176700
ATAC	1A:31781328-31781728	ATAC.K1	1.20576	3.00091	2.14092	2.3472	genic	TraesCS1A02G049700
ATAC	1A:31781833-31782056	ATAC.K1	0.321536	0.865128	0.458769	1.08802	genic	TraesCS1A02G049700
ATAC	1A:319318907-319319006	ATAC.K2	0.60288	0.405529	0.293102	0.22005	promoter	TraesCS1A02G177000
ATAC	1A:319887198-319887908	ATAC.K1	2.39143	5.05559	6.70312	6.22251	genic	TraesCS1A02G177300
ATAC	1A:320225743-320225907	ATAC.K2	1.4871	1.35176	0.89205	0.782399	promoter	TraesCS1A02G177400
ATAC	1A:320226338-320226620	ATAC.K2	3.49671	2.85222	1.64392	1.16137	promoter	TraesCS1A02G177400
ATAC	1A:320331553-320332044	ATAC.K3	2.0297	2.78463	0.522487	0.660149	promoter	TraesCS1A02G177500
ATAC	1A:320333052-320334005	ATAC.K4	1.36653	1.94654	8.51271	6.45479	promoter	TraesCS1A02G177500
ATAC	1A:32085361-32085687	ATAC.K4	1.18566	1.74377	3.3643	3.96089	genic	TraesCS1A02G050100
ATAC	1A:321112740-321113044	ATAC.K3	1.08518	1.8384	1.10869	0.476774	genic	TraesCS1A02G177800
ATAC	1A:321113437-321113903	ATAC.K2	2.23066	2.00061	1.56746	0.965773	genic	TraesCS1A02G177800
ATAC	1A:321225784-321226341	ATAC.K2	2.5321	0.675882	1.32533	1.2714	promoter	TraesCS1A02G177900
ATAC	1A:32259630-32259750	ATAC.K2	0.341632	0.216282	0.305846	0.0488999	promoter	TraesCS1A02G050400
ATAC	1A:32261852-32262238	ATAC.K4	0.582784	0.351458	1.01949	1.3692	genic	TraesCS1A02G050400
ATAC	1A:32290718-32291191	ATAC.K3	0.884224	1.13548	0.395051	0.232275	promoter	TraesCS1A02G050600
ATAC	1A:32291194-32291498	ATAC.K2	0.462208	0.351458	0.0764615	0.0733499	promoter	TraesCS1A02G050600
ATAC	1A:323192707-323192851	ATAC.K1	0.622976	1.13548	1.44002	0.990223	promoter	TraesCS1A02G178600
ATAC	1A:323206832-323207032	ATAC.K2	1.88903	1.67619	1.41454	0.977998	promoter	TraesCS1A02G178700
ATAC	1A:323207651-323207804	ATAC.K3	1.5273	1.56805	0.943025	0.537899	promoter	TraesCS1A02G178700
ATAC	1A:323208096-323208592	ATAC.K3	8.29965	14.1665	6.47374	4.30319	promoter	TraesCS1A02G178700
ATAC	1A:323286873-323287259	ATAC.K4	0.663168	0.97327	2.16641	1.83375	promoter	TraesCS1A02G178800
ATAC	1A:323288195-323288315	ATAC.K1	0.080384	0.405529	0.560717	0.342299	promoter	TraesCS1A02G178800
ATAC	1A:323960735-323960858	ATAC.K1	0.020096	0.243317	0.127436	0.391199	promoter	TraesCS1A02G179300
ATAC	1A:32453803-32454611	ATAC.K2	9.84705	2.48724	2.11543	2.98289	promoter	TraesCS1A02G050900
ATAC	1A:324623121-324623525	ATAC.K1	0.964609	2.62242	3.28784	3.17849	promoter	TraesCS1A02G179800
ATAC	1A:32476365-32476638	ATAC.K1	2.89383	6.21811	4.82982	5.23229	promoter	TraesCS1A02G051000
ATAC	1A:325048732-325049454	ATAC.K1	0.261248	0.648846	0.828333	0.990223	genic	TraesCS1A02G180200
ATAC	1A:325049725-325050030	ATAC.K4	0.040192	0.216282	0.35682	0.757949	genic	TraesCS1A02G180300
ATAC	1A:325054426-325054581	ATAC.K1	0.643072	1.54101	1.47826	1.43032	promoter	TraesCS1A02G180300
ATAC	1A:325781393-325782235	ATAC.K4	2.11008	5.92072	14.5022	11.9805	promoter	TraesCS1A02G180400
ATAC	1A:325788286-325788685	ATAC.K1	0.281344	0.97327	1.0832	0.415649	genic	TraesCS1A02G180400
ATAC	1A:326215442-326215850	ATAC.K2	3.31584	2.32503	1.63118	1.1736	promoter	TraesCS1A02G180600
ATAC	1A:326217895-326218470	ATAC.K2	2.41152	1.05438	1.60569	1.7604	promoter	TraesCS1A02G180700
ATAC	1A:327005656-327006272	ATAC.K4	0.542592	0.946234	3.7721	3.19072	promoter	TraesCS1A02G180800
ATAC	1A:327013905-327014114	ATAC.K3	2.67277	4.24454	2.12818	1.5648	genic	TraesCS1A02G180800
ATAC	1A:327014924-327015183	ATAC.K1	1.12538	3.08202	3.13492	2.71395	genic	TraesCS1A02G180800
ATAC	1A:327015883-327016451	ATAC.K3	12.4294	17.3161	7.85004	5.92911	genic	TraesCS1A02G181000
ATAC	1A:327017995-327018159	ATAC.K1	0.321536	1.86543	1.23613	1.2714	promoter	TraesCS1A02G181000
ATAC	1A:328253430-328253535	ATAC.K1	0.060288	0.405529	0.53523	0.366749	genic	TraesCS1A02G181900
ATAC	1A:329249224-329249704	ATAC.K2	3.73786	2.18986	1.10869	1.08802	promoter	TraesCS1A02G182300
ATAC	1A:330083880-330084048	ATAC.K4	0.060288	0.0811058	0.280359	0.513449	genic	TraesCS1A02G182400
ATAC	1A:33022152-33022571	ATAC.K4	0.281344	0.892164	0.649922	1.44255	genic	TraesCS1A02G051500
ATAC	1A:331518855-331519319	ATAC.K4	0.743552	1.71674	4.86805	4.05869	promoter	TraesCS1A02G183100
ATAC	1A:332042950-332043298	ATAC.K1	0.241152	0.729952	0.739128	0.782399	promoter	TraesCS1A02G183200
ATAC	1A:33231842-33232215	ATAC.K2	1.98951	1.02734	0.382307	0.440099	promoter	TraesCS1A02G051600
ATAC	1A:332383217-332383595	ATAC.K4	0.321536	0.270353	0.917538	1.3203	genic	TraesCS1A02G183300
ATAC	1A:333139237-333139737	ATAC.K2	2.83354	2.46021	1.17241	1.94377	promoter	TraesCS1A02G183400
ATAC	1A:333525495-333525607	ATAC.K2	0.522496	0.108141	0.229384	0.110025	promoter	TraesCS1A02G183600
ATAC	1A:33371934-33372154	ATAC.K2	1.98951	1.59508	1.46551	0.855749	genic	TraesCS1A02G051700
ATAC	1A:33373045-33373169	ATAC.K1	0.663168	0.905681	1.89879	1.13692	genic	TraesCS1A02G051700
ATAC	1A:33375019-33375224	ATAC.K3	6.33024	10.1382	6.70312	4.52324	promoter	TraesCS1A02G051800
ATAC	1A:333868270-333868739	ATAC.K4	0.20096	0.432564	0.662666	0.843524	promoter	TraesCS1A02G183900
ATAC	1A:333911507-333911848	ATAC.K3	0.582784	2.64946	0.649922	1.3203	promoter	TraesCS1A02G184000
ATAC	1A:333913028-333913289	ATAC.K1	0.743552	2.33855	1.80959	1.3692	promoter	TraesCS1A02G184000
ATAC	1A:33399774-33399870	ATAC.K2	0.361728	0.108141	0.101949	0.0488999	promoter	TraesCS1A02G052000
ATAC	1A:335034355-335034705	ATAC.K2	4.5417	3.51458	1.93702	1.63815	promoter	TraesCS1A02G184600
ATAC	1A:335549374-335549504	ATAC.K2	0.622976	0.270353	0.089205	0.26895	promoter	TraesCS1A02G184900
ATAC	1A:335828109-335828206	ATAC.K2	0.663168	0.0811058	0.420538	0.207825	genic	TraesCS1A02G185100
ATAC	1A:335829221-335829473	ATAC.K3	1.88903	2.0682	1.33808	1.01467	promoter	TraesCS1A02G185200
ATAC	1A:335835918-335836314	ATAC.K1	0.763648	1.56805	1.7841	1.5648	promoter	TraesCS1A02G185300
ATAC	1A:336214461-336214813	ATAC.K4	0.160768	0.378494	1.38905	1.62592	promoter	TraesCS1A02G185400
ATAC	1A:336476821-336476934	ATAC.K2	0.462208	0.351458	0.127436	0.0977998	genic	TraesCS1A02G185700
ATAC	1A:336609004-336609419	ATAC.K2	1.04499	0.567741	0.917538	0.378974	genic	TraesCS1A02G185800
ATAC	1A:337149661-337150255	ATAC.K4	1.78854	1.75729	4.2691	3.20294	promoter	TraesCS1A02G186000
ATAC	1A:337300432-337300704	ATAC.K3	1.76845	2.10875	1.33808	0.867973	genic	TraesCS1A02G186100
ATAC	1A:337301494-337302112	ATAC.K3	3.31584	4.09584	4.84256	2.2983	promoter	TraesCS1A02G186100
ATAC	1A:337658398-337658712	ATAC.K2	5.06419	2.62242	3.96325	3.32519	promoter	TraesCS1A02G186500
ATAC	1A:337678430-337678823	ATAC.K2	1.46701	0.540705	0.777358	0.721274	promoter	TraesCS1A02G186600
ATAC	1A:338211650-338211916	ATAC.K4	0.743552	0.919199	2.65066	3.27629	promoter	TraesCS1A02G187300
ATAC	1A:338221-338396	ATAC.K1	0.080384	0.405529	0.53523	0.513449	promoter	TraesCS1A02G001600
ATAC	1A:338597190-338597505	ATAC.K1	0.442112	1.05438	1.12143	1.0269	promoter	TraesCS1A02G187600
ATAC	1A:338834417-338834946	ATAC.K1	4.56179	11.517	9.1244	6.74819	genic	TraesCS1A02G187800
ATAC	1A:338837209-338837572	ATAC.K4	3.75795	2.46021	5.39053	4.48657	promoter	TraesCS1A02G187800
ATAC	1A:339098008-339098197	ATAC.K2	0.844032	0.635329	0.305846	0.317849	genic	TraesCS1A02G187900
ATAC	1A:3392412-3392840	ATAC.K4	0.562688	1.05438	3.60643	4.57214	promoter	TraesCS1A02G005800
ATAC	1A:339915560-339915768	ATAC.K2	0.60288	0.0811058	0.0764615	0.0855749	promoter	TraesCS1A02G188100
ATAC	1A:339917724-339918113	ATAC.K4	0.10048	0.270353	0.53523	1.11247	promoter	TraesCS1A02G188100
ATAC	1A:340014426-340014878	ATAC.K1	2.55219	4.48785	5.59443	5.36677	promoter	TraesCS1A02G188200
ATAC	1A:340249261-340249672	ATAC.K1	1.86893	5.05559	5.39053	5.35454	promoter	TraesCS1A02G188400
ATAC	1A:340413712-340413988	ATAC.K1	1.56749	2.41966	3.63192	3.03179	promoter	TraesCS1A02G188500
ATAC	1A:341871504-341871618	ATAC.K2	0.723456	0.432564	0.254872	0.12225	genic	TraesCS1A02G188800
ATAC	1A:341872326-341872412	ATAC.K2	0.582784	0.243317	0.395051	0.183375	genic	TraesCS1A02G188900
ATAC	1A:341873771-341874270	ATAC.K2	6.33024	4.78524	4.28184	3.15404	promoter	TraesCS1A02G188900
ATAC	1A:342379508-342379830	ATAC.K1	1.22586	2.08172	2.61243	2.7873	promoter	TraesCS1A02G189000
ATAC	1A:342390871-342391140	ATAC.K1	0.180864	0.216282	0.637179	0.293399	genic	TraesCS1A02G189100
ATAC	1A:342393286-342393482	ATAC.K2	1.08518	0.838093	0.573461	0.427874	promoter	TraesCS1A02G189200
ATAC	1A:342394583-342394899	ATAC.K3	0.743552	0.946234	0.815589	0.1956	promoter	TraesCS1A02G189200
ATAC	1A:342434096-342434235	ATAC.K2	0.622976	0.162212	0.127436	0.12225	genic	TraesCS1A02G189300
ATAC	1A:342435052-342435491	ATAC.K2	5.0441	1.81136	2.34482	1.88265	promoter	TraesCS1A02G189300
ATAC	1A:342435694-342435863	ATAC.K2	1.16557	0.270353	0.229384	0.110025	promoter	TraesCS1A02G189300
ATAC	1A:342435937-342436228	ATAC.K2	1.5072	0.432564	0.254872	0.12225	promoter	TraesCS1A02G189300
ATAC	1A:342878722-342879255	ATAC.K1	1.94931	3.83901	5.91302	4.37654	promoter	TraesCS1A02G189500
ATAC	1A:343614961-343615256	ATAC.K3	0.884224	0.97327	0.267615	0.317849	genic	TraesCS1A02G190000
ATAC	1A:343615337-343615509	ATAC.K3	0.20096	0.648846	0.0637179	0.0977998	genic	TraesCS1A02G190000
ATAC	1A:344288205-344288835	ATAC.K3	1.24595	5.5963	2.06446	1.47922	promoter	TraesCS1A02G190500
ATAC	1A:344468099-344468693	ATAC.K2	6.33024	3.08202	3.82307	3.10514	promoter	TraesCS1A02G190600
ATAC	1A:344490162-344490270	ATAC.K2	1.08518	0.567741	0.344077	0.574574	promoter	TraesCS1A02G190700
ATAC	1A:3446572-3446673	ATAC.K2	0.964609	0.594776	0.407795	0.476774	promoter	TraesCS1A02G005900
ATAC	1A:34534034-34534191	ATAC.K2	0.311488	0.108141	0.0127436	0.0366749	promoter	TraesCS1A02G052500
ATAC	1A:3454480-3454748	ATAC.K2	1.60768	0.540705	0.700897	0.562349	promoter	TraesCS1A02G006000
ATAC	1A:3456892-3457447	ATAC.K2	2.35123	1.51397	1.86056	1.1736	promoter	TraesCS1A02G006000
ATAC	1A:345783570-345783719	ATAC.K1	0.522496	0.865128	1.55472	1.23472	promoter	TraesCS1A02G191300
ATAC	1A:345786998-345787429	ATAC.K1	0.20096	1.89247	4.0652	2.97067	promoter	TraesCS1A02G191400
ATAC	1A:346445506-346445776	ATAC.K1	0.060288	0.432564	0.458769	0.391199	promoter	TraesCS1A02G191600
ATAC	1A:346681322-346681713	ATAC.K1	1.0249	2.97388	3.64466	4.07092	promoter	TraesCS1A02G191700
ATAC	1A:347321203-347321467	ATAC.K4	0.442112	0.594776	1.37631	1.23472	genic	TraesCS1A02G191800
ATAC	1A:347326100-347326348	ATAC.K3	0.984705	1.08141	0.446025	0.256725	promoter	TraesCS1A02G191900
ATAC	1A:347646736-347646970	ATAC.K1	0.422016	0.756987	1.09595	0.770174	promoter	TraesCS1A02G192400
ATAC	1A:347922920-347923099	ATAC.K2	0.80384	0.189247	0.191154	0.281175	genic	TraesCS1A02G192600
ATAC	1A:348402192-348403044	ATAC.K4	2.17037	1.62212	7.32756	6.50369	promoter	TraesCS1A02G192800
ATAC	1A:348403294-348403947	ATAC.K2	7.31495	1.3788	1.31259	0.819074	promoter	TraesCS1A02G192800
ATAC	1A:348687878-348688420	ATAC.K3	0.964609	4.32564	2.01349	2.55502	promoter	TraesCS1A02G192900
ATAC	1A:34877469-34877902	ATAC.K2	0.90432	0.108141	0.764615	0.513449	promoter	TraesCS1A02G052800
ATAC	1A:3491902-3491972	ATAC.K3	0.140672	0.621811	0.280359	0.0733499	promoter	TraesCS1A02G006200
ATAC	1A:350398605-350398748	ATAC.K2	3.93882	3.35237	2.01349	1.60147	genic	TraesCS1A02G193400
ATAC	1A:350403255-350403341	ATAC.K2	2.15027	0.621811	0.598948	0.635699	promoter	TraesCS1A02G193400
ATAC	1A:351350499-351351107	ATAC.K1	1.34643	2.58187	2.96925	2.07825	promoter	TraesCS1A02G194100
ATAC	1A:351859101-351859617	ATAC.K1	0.622976	2.1493	2.03897	1.21027	promoter	TraesCS1A02G194600
ATAC	1A:352012732-352013008	ATAC.K4	0.542592	1.0003	1.27436	1.44255	promoter	TraesCS1A02G195000
ATAC	1A:352865682-352866038	ATAC.K1	1.56749	3.32534	3.33882	4.09537	promoter	TraesCS1A02G195312
ATAC	1A:353259698-353259994	ATAC.K2	2.59239	1.08141	1.6949	1.467	promoter	TraesCS1A02G195500
ATAC	1A:353260196-353260440	ATAC.K2	1.90912	0.324423	0.407795	0.317849	promoter	TraesCS1A02G195500
ATAC	1A:353912072-353912368	ATAC.K2	1.22586	0.756987	0.547974	0.2445	promoter	TraesCS1A02G195900
ATAC	1A:353913575-353913756	ATAC.K3	0.361728	1.2301	0.497	0.158925	promoter	TraesCS1A02G195900
ATAC	1A:353914757-353915234	ATAC.K3	1.84883	5.65037	1.75861	1.38142	genic	TraesCS1A02G195900
ATAC	1A:354293269-354293410	ATAC.K1	0.010048	0.0135176	0.254872	0.02445	promoter	TraesCS1A02G196100
ATAC	1A:354938124-354938535	ATAC.K3	1.16557	2.62242	1.75861	0.904648	genic	TraesCS1A02G196600
ATAC	1A:354944080-354944563	ATAC.K3	2.81344	5.56926	3.04572	2.2494	genic	TraesCS1A02G196700
ATAC	1A:354947057-354947475	ATAC.K1	0.763648	2.40614	1.83508	1.89487	genic	TraesCS1A02G196700
ATAC	1A:354957729-354957936	ATAC.K1	1.4871	4.37971	3.70838	3.59414	promoter	TraesCS1A02G196800
ATAC	1A:355319325-355319397	ATAC.K2	0.160768	0.135176	0.0127436	0.012225	promoter	TraesCS1A02G197000
ATAC	1A:355325896-355326589	ATAC.K2	1.64787	0.919199	0.968512	0.635699	promoter	TraesCS1A02G197100
ATAC	1A:355623844-355624403	ATAC.K1	1.84883	3.94715	4.94451	3.81419	promoter	TraesCS1A02G197600
ATAC	1A:356430240-356430938	ATAC.K4	1.46701	1.86543	3.7721	4.70662	genic	TraesCS1A02G198300
ATAC	1A:356474517-356474598	ATAC.K2	0.562688	0.189247	0.17841	0.1467	genic	TraesCS1A02G198500
ATAC	1A:356476654-356477172	ATAC.K2	6.14938	4.27157	4.14166	3.17849	promoter	TraesCS1A02G198500
ATAC	1A:357060632-357061364	ATAC.K3	8.25946	7.75912	2.1919	1.6626	promoter	TraesCS1A02G198600
ATAC	1A:357061436-357061671	ATAC.K2	2.17037	1.48694	0.624435	0.733499	promoter	TraesCS1A02G198600
ATAC	1A:357123413-357123682	ATAC.K2	1.18566	0.594776	0.560717	0.733499	promoter	TraesCS1A02G198800
ATAC	1A:357123974-357124270	ATAC.K4	0.542592	0.648846	1.44002	1.93155	promoter	TraesCS1A02G198800
ATAC	1A:357414854-357415080	ATAC.K1	1.0048	1.73026	2.53597	1.77262	promoter	TraesCS1A02G198900
ATAC	1A:357787409-357787549	ATAC.K3	0.40192	0.608293	0.140179	0.0733499	promoter	TraesCS1A02G199200
ATAC	1A:357787657-357788157	ATAC.K3	3.85843	3.9877	2.06446	0.904648	promoter	TraesCS1A02G199200
ATAC	1A:3582582-3583484	ATAC.K3	1.70816	7.81319	3.83582	1.30807	promoter	TraesCS1A02G006500
ATAC	1A:3584021-3584891	ATAC.K3	2.19047	12.1659	4.98274	2.04157	promoter	TraesCS1A02G006500
ATAC	1A:358771927-358772373	ATAC.K4	1.0048	0.865128	2.17915	2.28607	promoter	TraesCS1A02G199600
ATAC	1A:35944163-35944557	ATAC.K4	0.884224	1.27066	2.39579	1.77262	promoter	TraesCS1A02G054400
ATAC	1A:35944679-35945016	ATAC.K4	0.783744	0.567741	2.7781	2.92177	promoter	TraesCS1A02G054400
ATAC	1A:360006506-360006891	ATAC.K2	1.62778	0.838093	0.67541	0.929098	promoter	TraesCS1A02G200200
ATAC	1A:360009794-360010216	ATAC.K2	1.64787	0.135176	0.471512	0.464549	promoter	TraesCS1A02G200200
ATAC	1A:360457722-360457805	ATAC.K2	0.261248	0.0811058	0.0127436	0.1467	genic	TraesCS1A02G200400
ATAC	1A:360459166-360459321	ATAC.K2	0.643072	0.108141	0.140179	0.158925	promoter	TraesCS1A02G200400
ATAC	1A:361174423-361175044	ATAC.K4	1.98951	1.67619	5.81107	5.09782	promoter	TraesCS1A02G200500
ATAC	1A:361516872-361517267	ATAC.K1	0.924416	2.40614	2.38305	2.06602	promoter	TraesCS1A02G200900
ATAC	1A:36174511-36174616	ATAC.K2	0.180864	0.0540705	0.0382307	0.012225	promoter	TraesCS1A02G054500
ATAC	1A:3618723-3618850	ATAC.K2	0.663168	0.135176	0.0764615	0.110025	promoter	TraesCS1A02G006700
ATAC	1A:362064006-362064792	ATAC.K4	0.442112	0.324423	1.21064	1.14915	promoter	TraesCS1A02G201000
ATAC	1A:362402270-362403105	ATAC.K2	12.2988	7.0562	6.88153	5.81909	promoter	TraesCS1A02G201400
ATAC	1A:362859331-362859435	ATAC.K1	0.10048	0.784023	0.509743	0.525674	promoter	TraesCS1A02G201600
ATAC	1A:363419723-363419885	ATAC.K2	0.643072	0.0540705	0.0637179	0.0488999	promoter	TraesCS1A02G202100
ATAC	1A:363421689-363421759	ATAC.K2	0.241152	0.0811058	0.0254872	0.012225	genic	TraesCS1A02G202100
ATAC	1A:363421927-363422025	ATAC.K2	0.381824	0.2298	0.152923	0.0855749	genic	TraesCS1A02G202100
ATAC	1A:363448603-363449211	ATAC.K2	7.69677	3.70383	4.21812	3.03179	promoter	TraesCS1A02G202300
ATAC	1A:363639085-363639249	ATAC.K2	0.422016	0.351458	0.0764615	0.0977998	genic	TraesCS1A02G202500
ATAC	1A:363643194-363643275	ATAC.K3	0.582784	0.919199	0.229384	0.183375	promoter	TraesCS1A02G202500
ATAC	1A:364046476-364047197	ATAC.K3	5.94842	15.9238	6.06594	2.22495	promoter	TraesCS1A02G202900
ATAC	1A:364652508-364652753	ATAC.K2	3.71776	2.40614	1.51649	0.929098	promoter	TraesCS1A02G203200
ATAC	1A:364653001-364653389	ATAC.K2	3.56704	2.00061	2.42128	1.73595	promoter	TraesCS1A02G203200
ATAC	1A:364934705-364935040	ATAC.K4	0.924416	0.459599	1.491	1.34475	promoter	TraesCS1A02G203300
ATAC	1A:365491655-365492409	ATAC.K2	3.35603	0.729952	2.10269	2.42055	promoter	TraesCS1A02G203600
ATAC	1A:365493657-365493738	ATAC.K2	0.30144	0.0135176	0.0254872	0.0855749	genic	TraesCS1A02G203600
ATAC	1A:365507029-365507481	ATAC.K2	1.62778	0.919199	0.293102	0.586799	promoter	TraesCS1A02G203700
ATAC	1A:365621513-365621675	ATAC.K4	0.30144	0.567741	0.688153	0.929098	promoter	TraesCS1A02G203900
ATAC	1A:36621188-36621608	ATAC.K3	1.26605	1.59508	0.458769	0.366749	promoter	TraesCS1A02G055900
ATAC	1A:366271456-366271618	ATAC.K1	0.422016	0.527188	0.993999	0.330074	genic	TraesCS1A02G204300
ATAC	1A:366271992-366272939	ATAC.K1	2.0297	4.32564	6.69038	4.55992	genic	TraesCS1A02G204300
ATAC	1A:366299752-366299998	ATAC.K1	0.622976	1.10845	1.52923	1.19805	promoter	TraesCS1A02G204500
ATAC	1A:366987409-366987717	ATAC.K4	0.040192	0.108141	0.509743	0.537899	promoter	TraesCS1A02G204800
ATAC	1A:367380879-367381466	ATAC.K2	4.44122	1.70322	2.52323	1.87042	promoter	TraesCS1A02G205100
ATAC	1A:367382137-367383367	ATAC.K4	2.0297	1.29769	5.32682	3.72862	genic	TraesCS1A02G205100
ATAC	1A:36777766-36777876	ATAC.K2	0.783744	0.337941	0.968512	0.342299	genic	TraesCS1A02G056600
ATAC	1A:367874322-367874684	ATAC.K4	0.281344	0.432564	0.993999	0.647924	genic	TraesCS1A02G205300
ATAC	1A:36793443-36793521	ATAC.K2	0.40192	0.0540705	0.0509743	0.0488999	promoter	TraesCS1A02G056700
ATAC	1A:36793851-36794256	ATAC.K2	2.91392	0.946234	0.331333	0.440099	promoter	TraesCS1A02G056700
ATAC	1A:36823568-36823878	ATAC.K2	1.62778	0.351458	0.35682	0.611249	promoter	TraesCS1A02G056800
ATAC	1A:368372481-368372621	ATAC.K1	0.010048	0.0540705	0.17841	0.0488999	genic	TraesCS1A02G206000
ATAC	1A:368712829-368713375	ATAC.K2	2.88378	1.08141	1.29984	0.562349	genic	TraesCS1A02G206100
ATAC	1A:368746322-368746622	ATAC.K2	0.844032	0.297388	0.089205	0.207825	promoter	TraesCS1A02G206200
ATAC	1A:368797323-368797769	ATAC.K4	0.864128	0.892164	2.59969	2.0538	promoter	TraesCS1A02G206300
ATAC	1A:368808492-368808883	ATAC.K4	0.20096	0.135176	1.66941	1.38142	genic	TraesCS1A02G206600
ATAC	1A:368830925-368831797	ATAC.K1	3.0345	6.10997	7.60792	6.91934	genic	TraesCS1A02G206800
ATAC	1A:369048611-369048791	ATAC.K1	0.80384	1.32473	1.988	1.78485	promoter	TraesCS1A02G206900
ATAC	1A:369048986-369049304	ATAC.K4	0.633024	0.892164	1.26161	1.58925	promoter	TraesCS1A02G206900
ATAC	1A:369084326-369084512	ATAC.K1	0.060288	0.405529	0.688153	0.427874	genic	TraesCS1A02G207000
ATAC	1A:369495719-369495797	ATAC.K1	0.20096	1.08141	0.993999	0.733499	genic	TraesCS1A02G207500
ATAC	1A:369497366-369497993	ATAC.K1	5.42592	15.1397	13.8905	9.92668	promoter	TraesCS1A02G207600
ATAC	1A:369499336-369499678	ATAC.K1	1.32634	2.79815	4.00148	2.97067	promoter	TraesCS1A02G207600
ATAC	1A:369503070-369503650	ATAC.K1	0.823936	1.90599	2.43402	1.67482	genic	TraesCS1A02G207700
ATAC	1A:369581445-369581550	ATAC.K2	0.180864	0.162212	0.0127436	0.02445	genic	TraesCS1A02G207900
ATAC	1A:370100539-370100827	ATAC.K4	0.381824	0.486635	0.89205	1.7604	promoter	TraesCS1A02G208600
ATAC	1A:370102692-370103281	ATAC.K1	1.58758	4.89338	5.67089	6.24696	promoter	TraesCS1A02G208600
ATAC	1A:370111057-370111315	ATAC.K4	0.10048	0.108141	2.80359	1.69927	promoter	TraesCS1A02G208700
ATAC	1A:370111989-370112424	ATAC.K4	0.823936	0.811058	8.44899	7.99514	promoter	TraesCS1A02G208700
ATAC	1A:371083833-371084148	ATAC.K1	1.82874	2.81167	4.07795	3.42299	promoter	TraesCS1A02G209000
ATAC	1A:372069791-372070632	ATAC.K1	3.0144	6.50198	7.69712	7.46946	promoter	TraesCS1A02G209400
ATAC	1A:372236159-372236529	ATAC.K1	2.25075	4.27157	4.71512	5.18339	promoter	TraesCS1A02G209600
ATAC	1A:372316523-372316641	ATAC.K2	0.261248	0.0270353	0.0509743	0.02445	promoter	TraesCS1A02G209900
ATAC	1A:372316728-372316984	ATAC.K2	0.160768	0.0540705	0.0127436	0.207825	promoter	TraesCS1A02G209900
ATAC	1A:372467785-372468247	ATAC.K2	1.28614	1.21659	0.140179	0.599024	promoter	TraesCS1A02G210000
ATAC	1A:372627141-372627435	ATAC.K1	0.221056	1.02734	0.586205	0.757949	genic	TraesCS1A02G210300
ATAC	1A:372637102-372637276	ATAC.K1	1.58758	3.32534	2.51048	2.2005	promoter	TraesCS1A02G210300
ATAC	1A:372643212-372644213	ATAC.K3	12.0777	18.8976	12.374	9.29098	promoter	TraesCS1A02G210400
ATAC	1A:372945620-372945712	ATAC.K3	0.180864	0.594776	0.17841	0.02445	promoter	TraesCS1A02G210600
ATAC	1A:373312533-373313659	ATAC.K2	19.9553	11.7333	10.6919	6.30809	promoter	TraesCS1A02G210800
ATAC	1A:373766055-373766271	ATAC.K4	0.5024	0.297388	1.07046	1.14915	promoter	TraesCS1A02G210900
ATAC	1A:373767291-373767541	ATAC.K4	0.261248	0.216282	1.00674	0.953548	genic	TraesCS1A02G210900
ATAC	1A:373770932-373770998	ATAC.K2	0.341632	0.0811058	0.0254872	0.0488999	genic	TraesCS1A02G211000
ATAC	1A:373771848-373772136	ATAC.K4	0.60288	0.459599	1.1979	1.43032	genic	TraesCS1A02G211000
ATAC	1A:373772929-373773575	ATAC.K4	2.0096	2.70353	4.65141	3.75307	genic	TraesCS1A02G211000
ATAC	1A:373774828-373775154	ATAC.K4	0.823936	0.621811	2.59969	2.09047	promoter	TraesCS1A02G211000
ATAC	1A:374168498-374168644	ATAC.K2	0.80384	0.243317	0.242128	0.1467	genic	TraesCS1A02G211300
ATAC	1A:374214497-374214607	ATAC.K2	1.16557	0.243317	0.165667	0.22005	promoter	TraesCS1A02G211500
ATAC	1A:374566371-374566866	ATAC.K1	0.442112	1.12196	1.64392	1.13692	promoter	TraesCS1A02G211900
ATAC	1A:374689388-374689798	ATAC.K4	1.88903	1.35176	3.10943	2.75062	genic	TraesCS1A02G212000
ATAC	1A:374690667-374691222	ATAC.K4	1.68806	0.986787	5.28858	4.88999	promoter	TraesCS1A02G212000
ATAC	1A:374958654-374958923	ATAC.K2	0.482304	0.108141	0.089205	0.0733499	genic	TraesCS1A02G212200
ATAC	1A:375015719-375015924	ATAC.K4	0.341632	0.189247	1.18515	1.50367	promoter	TraesCS1A02G212300
ATAC	1A:375016344-375016975	ATAC.K4	0.60288	0.297388	1.23613	2.02935	promoter	TraesCS1A02G212300
ATAC	1A:375469300-375469651	ATAC.K1	1.0048	2.50076	3.21138	2.84842	genic	TraesCS1A02G212600
ATAC	1A:37619473-37619595	ATAC.K2	0.341632	0.0811058	0.0764615	0.012225	genic	TraesCS1A02G057600
ATAC	1A:376508401-376508935	ATAC.K3	5.20487	5.46112	3.37705	2.1027	promoter	TraesCS1A02G213000
ATAC	1A:376784619-376785169	ATAC.K2	6.85274	3.41996	2.06446	1.82152	promoter	TraesCS1A02G213600
ATAC	1A:377001282-377001569	ATAC.K4	0.562688	0.459599	2.99474	2.7873	promoter	TraesCS1A02G213700
ATAC	1A:377001933-377002189	ATAC.K4	0.120576	0.0270353	1.17241	1.0758	promoter	TraesCS1A02G213700
ATAC	1A:377003093-377003492	ATAC.K4	0.160768	0.0540705	2.23013	1.88265	genic	TraesCS1A02G213700
ATAC	1A:377004054-377004446	ATAC.K4	0.562688	0.432564	1.75861	2.31052	genic	TraesCS1A02G213700
ATAC	1A:377005401-377005589	ATAC.K2	0.823936	0.162212	0.165667	0.256725	genic	TraesCS1A02G213700
ATAC	1A:377016898-377017098	ATAC.K2	1.17562	0.364976	0.458769	0.330074	genic	TraesCS1A02G213800
ATAC	1A:377024047-377024267	ATAC.K4	0.10048	0.0270353	0.662666	0.660149	genic	TraesCS1A02G213900
ATAC	1A:377228068-377228227	ATAC.K2	0.381824	0.135176	0.0127436	0.12225	promoter	TraesCS1A02G214200
ATAC	1A:377426752-377427066	ATAC.K4	0.20096	0.405529	0.739128	1.4181	promoter	TraesCS1A02G214300
ATAC	1A:377446536-377446704	ATAC.K1	1.12538	2.10875	2.44677	2.50612	promoter	TraesCS1A02G214400
ATAC	1A:377448639-377449298	ATAC.K4	0.30144	0.108141	5.59443	5.18339	promoter	TraesCS1A02G214400
ATAC	1A:377449910-377450442	ATAC.K4	0.482304	0.135176	6.99622	5.41567	genic	TraesCS1A02G214500
ATAC	1A:377451534-377452072	ATAC.K4	3.45651	1.52749	9.76158	8.60638	promoter	TraesCS1A02G214500
ATAC	1A:377502498-377502870	ATAC.K4	0.80384	1.33825	2.70164	2.50612	promoter	TraesCS1A02G214600
ATAC	1A:377503517-377503629	ATAC.K1	0.321536	0.811058	1.33808	1.19805	promoter	TraesCS1A02G214600
ATAC	1A:377504111-377504410	ATAC.K1	1.06509	2.05468	2.17915	2.31052	promoter	TraesCS1A02G214600
ATAC	1A:377610649-377611104	ATAC.K1	1.56749	3.56865	2.81633	2.35942	promoter	TraesCS1A02G214700
ATAC	1A:377612554-377613187	ATAC.K3	4.11968	8.29983	6.02771	3.99757	promoter	TraesCS1A02G214700
ATAC	1A:377613964-377614204	ATAC.K2	1.72826	0.648846	0.369564	0.158925	genic	TraesCS1A02G214700
ATAC	1A:377614293-377614583	ATAC.K3	3.29575	4.27157	2.33207	1.50367	genic	TraesCS1A02G214700
ATAC	1A:380937452-380937547	ATAC.K2	1.20576	0.608293	0.586205	0.391199	promoter	TraesCS1A02G215400
ATAC	1A:380939322-380939605	ATAC.K1	1.58758	2.62242	3.52997	2.82397	promoter	TraesCS1A02G215400
ATAC	1A:380966950-380967505	ATAC.K2	1.18566	0.770505	0.89205	0.342299	genic	TraesCS1A02G215400
ATAC	1A:380968237-380968447	ATAC.K2	0.70336	0.459599	0.446025	0.22005	genic	TraesCS1A02G215400
ATAC	1A:380968606-380968679	ATAC.K2	0.361728	0.243317	0.0764615	0.02445	genic	TraesCS1A02G215400
ATAC	1A:380973568-380974250	ATAC.K2	3.87853	1.9195	2.54872	1.6626	genic	TraesCS1A02G215400
ATAC	1A:382593486-382593768	ATAC.K4	0.30144	0.324423	0.611692	1.05135	promoter	TraesCS1A02G216400
ATAC	1A:384323966-384324343	ATAC.K1	0.823936	1.59508	2.21738	1.98045	promoter	TraesCS1A02G216800
ATAC	1A:384336277-384336591	ATAC.K1	1.36653	3.08202	2.61243	3.20294	promoter	TraesCS1A02G216900
ATAC	1A:384777294-384777383	ATAC.K2	0.341632	0.162212	0.0764615	0.02445	promoter	TraesCS1A02G217000
ATAC	1A:384777938-384778223	ATAC.K1	0.30144	0.540705	1.12143	0.745724	promoter	TraesCS1A02G217000
ATAC	1A:3848138-3848419	ATAC.K2	0.80384	0.162212	0.101949	0.0977998	promoter	TraesCS1A02G007300
ATAC	1A:38484200-38484549	ATAC.K1	1.68806	3.7579	3.31333	4.00979	genic	TraesCS1A02G058000
ATAC	1A:385276854-385277166	ATAC.K1	0.080384	0.811058	0.89205	0.965773	genic	TraesCS1A02G217200
ATAC	1A:385277286-385277439	ATAC.K1	0.060288	0.621811	0.649922	0.586799	genic	TraesCS1A02G217200
ATAC	1A:385351980-385352228	ATAC.K2	1.0249	0.784023	0.751871	0.378974	genic	TraesCS1A02G217300
ATAC	1A:385359886-385360536	ATAC.K1	2.08999	5.56926	5.00823	4.62104	promoter	TraesCS1A02G217400
ATAC	1A:385660285-385660694	ATAC.K4	0.90432	0.540705	3.0712	2.70172	promoter	TraesCS1A02G217700
ATAC	1A:385668640-385668727	ATAC.K2	0.562688	0.108141	0.254872	0.0977998	genic	TraesCS1A02G217800
ATAC	1A:385669260-385669626	ATAC.K2	2.83354	0.770505	0.67541	0.427874	genic	TraesCS1A02G217800
ATAC	1A:386480323-386480742	ATAC.K2	4.11968	1.56805	1.55472	1.34475	promoter	TraesCS1A02G218100
ATAC	1A:386869557-386870120	ATAC.K4	0.582784	0.594776	3.79759	3.10514	promoter	TraesCS1A02G218300
ATAC	1A:386871020-386871391	ATAC.K4	0.321536	0.405529	1.63118	1.16137	genic	TraesCS1A02G218300
ATAC	1A:387031204-387031352	ATAC.K2	1.38662	0.594776	0.67541	0.721274	promoter	TraesCS1A02G218500
ATAC	1A:387033129-387033522	ATAC.K2	3.35603	1.97357	1.54197	1.54035	promoter	TraesCS1A02G218500
ATAC	1A:387033730-387034123	ATAC.K1	1.34643	2.91981	3.2751	2.5917	promoter	TraesCS1A02G218500
ATAC	1A:38718560-38718880	ATAC.K1	1.98951	4.33916	3.37705	4.13204	promoter	TraesCS1A02G058300
ATAC	1A:387199843-387200076	ATAC.K2	1.62778	0.97327	0.35682	0.1467	promoter	TraesCS1A02G218600
ATAC	1A:387200518-387200713	ATAC.K2	1.36653	0.729952	0.382307	0.354524	promoter	TraesCS1A02G218600
ATAC	1A:38720495-38720759	ATAC.K1	0.442112	1.21659	1.50374	1.88265	promoter	TraesCS1A02G058300
ATAC	1A:38735503-38736028	ATAC.K1	2.11008	11.7333	11.329	7.99514	promoter	TraesCS1A02G058400
ATAC	1A:387514600-387514914	ATAC.K1	0.944512	2.50076	2.14092	1.94377	promoter	TraesCS1A02G218800
ATAC	1A:387813339-387813564	ATAC.K1	0.140672	0.594776	0.267615	0.623474	promoter	TraesCS1A02G219000
ATAC	1A:387840587-387840680	ATAC.K1	0.381824	1.27066	1.09595	0.843524	genic	TraesCS1A02G219200
ATAC	1A:388485463-388485575	ATAC.K2	0.261248	0.189247	0.0254872	0.0733499	promoter	TraesCS1A02G219600
ATAC	1A:388850164-388850411	ATAC.K4	0.241152	0.162212	1.04497	1.08802	genic	TraesCS1A02G220000
ATAC	1A:389797751-389798254	ATAC.K2	2.33114	1.28418	1.38905	1.1247	promoter	TraesCS1A02G220500
ATAC	1A:389807407-389807656	ATAC.K1	0.964609	1.67619	3.02023	2.45722	promoter	TraesCS1A02G220600
ATAC	1A:389821386-389821670	ATAC.K4	0.422016	1.10845	2.96925	3.17849	promoter	TraesCS1A02G220700
ATAC	1A:389821838-389822553	ATAC.K4	1.42682	2.43317	7.18738	6.23474	promoter	TraesCS1A02G220700
ATAC	1A:389829030-389829287	ATAC.K3	1.86893	3.51458	2.01349	0.867973	promoter	TraesCS1A02G220900
ATAC	1A:389868865-389869129	ATAC.K2	0.864128	0.189247	0.152923	0.1467	promoter	TraesCS1A02G221000
ATAC	1A:389869198-389869284	ATAC.K2	0.381824	0.0540705	0.0254872	0.1956	promoter	TraesCS1A02G221000
ATAC	1A:389870260-389870564	ATAC.K3	0.462208	1.51397	0.611692	0.537899	genic	TraesCS1A02G221000
ATAC	1A:390705048-390705542	ATAC.K4	1.4871	3.05498	4.40928	5.35454	promoter	TraesCS1A02G221600
ATAC	1A:390706376-390706503	ATAC.K2	1.0249	0.824576	0.089205	0.158925	promoter	TraesCS1A02G221600
ATAC	1A:390706998-390707248	ATAC.K3	4.5417	4.35268	2.26836	2.22495	promoter	TraesCS1A02G221600
ATAC	1A:390708226-390708617	ATAC.K4	2.67277	2.54131	4.65141	5.20784	promoter	TraesCS1A02G221600
ATAC	1A:3908958-3909089	ATAC.K2	0.361728	0.189247	0.0254872	0.0366749	promoter	TraesCS1A02G007344
ATAC	1A:391249009-391249410	ATAC.K4	2.37133	2.02764	5.59443	3.77752	promoter	TraesCS1A02G221800
ATAC	1A:391257580-391257736	ATAC.K2	1.10528	0.838093	1.29984	0.574574	genic	TraesCS1A02G221900
ATAC	1A:391668507-391668762	ATAC.K4	0.944512	0.851611	2.43402	1.99267	promoter	TraesCS1A02G222000
ATAC	1A:391851077-391851537	ATAC.K4	1.06509	1.13548	3.30059	4.15649	promoter	TraesCS1A02G222200
ATAC	1A:391940671-391940968	ATAC.K4	0.442112	1.67619	2.88005	3.63082	genic	TraesCS1A02G222300
ATAC	1A:391941711-391942501	ATAC.K1	1.18566	5.75851	7.73535	6.66261	promoter	TraesCS1A02G222300
ATAC	1A:391943217-391943396	ATAC.K1	0.422016	0.79754	0.624435	1.06357	promoter	TraesCS1A02G222300
ATAC	1A:391944042-391944228	ATAC.K1	0.763648	1.6086	1.73313	1.6626	promoter	TraesCS1A02G222300
ATAC	1A:392085251-392085373	ATAC.K4	0.180864	0.702917	1.22338	1.23472	promoter	TraesCS1A02G222500
ATAC	1A:392523611-392524082	ATAC.K2	4.15987	2.3791	2.66341	2.21272	promoter	TraesCS1A02G222700
ATAC	1A:392746117-392746347	ATAC.K4	0.10048	0.108141	0.726384	1.3203	genic	TraesCS1A02G222900
ATAC	1A:392774273-392774543	ATAC.K4	0.341632	0.865128	1.24887	1.78485	promoter	TraesCS1A02G223000
ATAC	1A:393611965-393612393	ATAC.K3	2.73306	3.16313	1.37631	0.562349	promoter	TraesCS1A02G223400
ATAC	1A:393612826-393612898	ATAC.K2	0.281344	0.216282	0.0382307	0.02445	genic	TraesCS1A02G223400
ATAC	1A:39410058-39410997	ATAC.K4	2.97421	3.59569	11.3928	11.8093	promoter	TraesCS1A02G058700
ATAC	1A:394249230-394249372	ATAC.K2	1.40672	0.621811	0.395051	0.22005	promoter	TraesCS1A02G223600
ATAC	1A:394249711-394250230	ATAC.K2	5.26515	1.77081	1.63118	1.54035	promoter	TraesCS1A02G223600
ATAC	1A:394251420-394251599	ATAC.K2	1.24595	0.675882	0.458769	0.709049	genic	TraesCS1A02G223600
ATAC	1A:394587501-394588806	ATAC.K3	5.24506	5.92072	3.61918	2.5917	promoter	TraesCS1A02G224600
ATAC	1A:394854512-394854717	ATAC.K3	0.361728	0.811058	0.152923	0.647924	promoter	TraesCS1A02G224900
ATAC	1A:395171851-395172226	ATAC.K1	1.66797	3.41996	4.58769	4.48657	promoter	TraesCS1A02G225000
ATAC	1A:395172567-395172750	ATAC.K2	1.18566	0.811058	0.509743	0.464549	genic	TraesCS1A02G225000
ATAC	1A:395182190-395182400	ATAC.K1	0.763648	2.23041	2.24287	1.68705	promoter	TraesCS1A02G225100
ATAC	1A:395205893-395206179	ATAC.K4	0.040192	0.162212	0.165667	0.378974	genic	TraesCS1A02G225100
ATAC	1A:396106459-396107109	ATAC.K4	2.71296	2.18986	8.51271	9.52326	genic	TraesCS1A02G225700
ATAC	1A:396107348-396107477	ATAC.K4	0.10048	0.121659	0.841076	0.770174	genic	TraesCS1A02G225700
ATAC	1A:396110122-396110391	ATAC.K4	0.381824	0.540705	1.42728	1.34475	promoter	TraesCS1A02G225700
ATAC	1A:397769309-397769488	ATAC.K4	0.040192	0.0811058	0.293102	0.378974	promoter	TraesCS1A02G227100
ATAC	1A:398131246-398131613	ATAC.K4	1.16557	1.33825	2.71438	2.445	promoter	TraesCS1A02G227400
ATAC	1A:39821718-39821790	ATAC.K2	0.160768	0.0811058	0.0127436	0.02445	promoter	TraesCS1A02G059000
ATAC	1A:398670776-398671125	ATAC.K3	1.4871	4.65007	3.10943	2.3961	promoter	TraesCS1A02G227700
ATAC	1A:39870044-39870777	ATAC.K4	0.542592	0.594776	2.21738	3.66749	genic	TraesCS1A02G059100
ATAC	1A:39894829-39895099	ATAC.K4	0.70336	0.838093	1.54197	2.31052	promoter	TraesCS1A02G059200
ATAC	1A:39897229-39897604	ATAC.K4	0.70336	1.0003	0.777358	1.55257	promoter	TraesCS1A02G059200
ATAC	1A:399229850-399230102	ATAC.K4	0.140672	0.162212	0.611692	0.293399	genic	TraesCS1A02G228000
ATAC	1A:399231144-399231430	ATAC.K3	0.281344	2.27096	0.624435	1.25917	genic	TraesCS1A02G228000
ATAC	1A:399232627-399232883	ATAC.K1	0.261248	0.648846	0.89205	0.904648	promoter	TraesCS1A02G228000
ATAC	1A:399234479-399234583	ATAC.K2	0.361728	0.162212	0.114692	0.02445	promoter	TraesCS1A02G228000
ATAC	1A:399242534-399243053	ATAC.K1	2.73306	6.35329	4.84256	5.25674	genic	TraesCS1A02G228100
ATAC	1A:399244707-399245009	ATAC.K1	0.783744	3.32534	2.59969	1.91932	genic	TraesCS1A02G228100
ATAC	1A:399471486-399471592	ATAC.K2	0.562688	0.135176	0.101949	0.158925	genic	TraesCS1A02G228200
ATAC	1A:399474234-399474672	ATAC.K2	4.20007	1.18955	1.42728	2.1516	promoter	TraesCS1A02G228200
ATAC	1A:399475428-399475677	ATAC.K4	0.30144	0.0540705	1.04497	0.892423	promoter	TraesCS1A02G228200
ATAC	1A:399592751-399593528	ATAC.K4	0.723456	1.35176	3.17315	3.27629	promoter	TraesCS1A02G228400
ATAC	1A:399593635-399593758	ATAC.K2	0.5024	0.243317	0.101949	0.17115	promoter	TraesCS1A02G228400
ATAC	1A:400965478-400965726	ATAC.K1	0.80384	2.1493	2.11543	2.18827	promoter	TraesCS1A02G228900
ATAC	1A:400976339-400976414	ATAC.K2	0.381824	0.108141	0.0509743	0.0488999	promoter	TraesCS1A02G229000
ATAC	1A:401641386-401641514	ATAC.K3	0.080384	0.432564	0.0509743	0.012225	genic	TraesCS1A02G229300
ATAC	1A:401775814-401776206	ATAC.K1	0.823936	1.67619	1.94977	2.0538	promoter	TraesCS1A02G229400
ATAC	1A:402258809-402258997	ATAC.K1	0.040192	0.108141	0.344077	0.12225	genic	TraesCS1A02G229700
ATAC	1A:402278716-402279157	ATAC.K4	1.20576	1.16252	3.00748	2.45722	promoter	TraesCS1A02G229800
ATAC	1A:402281242-402281327	ATAC.K2	0.241152	0.0270353	0.0127436	0.012225	promoter	TraesCS1A02G229800
ATAC	1A:402384-402518	ATAC.K1	0.020096	0.594776	0.35682	0.880198	promoter	TraesCS1A02G001700
ATAC	1A:402936024-402936101	ATAC.K3	0.60288	0.594776	0.0764615	0.12225	promoter	TraesCS1A02G230200
ATAC	1A:402938376-402938724	ATAC.K3	2.11008	2.00061	0.89205	1.00245	promoter	TraesCS1A02G230200
ATAC	1A:402939442-402939729	ATAC.K3	2.93402	3.97418	0.943025	0.794624	genic	TraesCS1A02G230200
ATAC	1A:403026067-403026157	ATAC.K2	0.964609	0.256835	0.395051	0.293399	genic	TraesCS1A02G230400
ATAC	1A:403026255-403026330	ATAC.K2	1.0249	0.432564	0.509743	0.183375	genic	TraesCS1A02G230400
ATAC	1A:403026452-403026524	ATAC.K2	1.2359	0.567741	0.573461	0.317849	genic	TraesCS1A02G230400
ATAC	1A:403027039-403027839	ATAC.K2	8.80205	3.63624	2.982	1.68705	genic	TraesCS1A02G230500
ATAC	1A:403028021-403028195	ATAC.K2	2.0297	0.432564	0.497	0.281175	genic	TraesCS1A02G230500
ATAC	1A:403610637-403610964	ATAC.K2	1.12538	0.51367	0.0764615	0.17115	promoter	TraesCS1A02G230800
ATAC	1A:403611041-403611140	ATAC.K2	0.321536	0.0540705	0.0127436	0.012225	promoter	TraesCS1A02G230800
ATAC	1A:403654745-403655021	ATAC.K3	1.26605	4.32564	2.65066	1.14915	genic	TraesCS1A02G231100
ATAC	1A:403662273-403662424	ATAC.K1	0.321536	1.18955	0.866563	0.831299	promoter	TraesCS1A02G231100
ATAC	1A:403830389-403830650	ATAC.K4	1.5273	1.05438	2.11543	2.57947	genic	TraesCS1A02G231200
ATAC	1A:4045502-4045858	ATAC.K4	1.64787	2.70353	3.42802	3.94867	promoter	TraesCS1A02G007500
ATAC	1A:404625295-404625565	ATAC.K2	0.60288	0.432564	0.191154	0.17115	promoter	TraesCS1A02G231500
ATAC	1A:405008880-405009065	ATAC.K4	0.020096	0.135176	0.0764615	0.293399	promoter	TraesCS1A02G231600
ATAC	1A:4053705-4053876	ATAC.K2	0.984705	0.243317	0.101949	0.0977998	promoter	TraesCS1A02G007700
ATAC	1A:405681488-405681596	ATAC.K2	0.40192	0.297388	0.305846	0.0366749	promoter	TraesCS1A02G232200
ATAC	1A:405791691-405792575	ATAC.K1	0.844032	1.10845	1.94977	1.34475	promoter	TraesCS1A02G232300
ATAC	1A:405868004-405868552	ATAC.K4	2.59239	1.43287	2.65066	3.65527	promoter	TraesCS1A02G232500
ATAC	1A:406143556-406143845	ATAC.K3	3.57709	4.40675	3.37705	2.1516	genic	TraesCS1A02G232600
ATAC	1A:4061447-4061654	ATAC.K4	0.140672	0.0811058	0.331333	0.635699	promoter	TraesCS1A02G007900
ATAC	1A:406186081-406186475	ATAC.K4	1.70816	2.3791	4.01423	3.36187	promoter	TraesCS1A02G232900
ATAC	1A:407129895-407130058	ATAC.K3	0.190912	0.702917	0.280359	0.0488999	promoter	TraesCS1A02G233300
ATAC	1A:407131764-407132055	ATAC.K2	1.14547	0.621811	0.203897	0.415649	promoter	TraesCS1A02G233300
ATAC	1A:407328873-407329142	ATAC.K1	0.10048	0.351458	0.688153	0.391199	promoter	TraesCS1A02G233500
ATAC	1A:407330003-407330120	ATAC.K4	0.020096	0.0270353	0.127436	0.281175	promoter	TraesCS1A02G233500
ATAC	1A:407336875-407337139	ATAC.K3	0.70336	1.90599	1.36356	0.770174	promoter	TraesCS1A02G233600
ATAC	1A:408490916-408491305	ATAC.K2	2.99431	2.62242	2.26836	1.58925	promoter	TraesCS1A02G233800
ATAC	1A:408493583-408493872	ATAC.K3	1.76845	2.24393	1.33808	0.904648	genic	TraesCS1A02G233800
ATAC	1A:409834496-409834971	ATAC.K4	0.482304	1.01382	2.42128	2.1027	promoter	TraesCS1A02G234300
ATAC	1A:409838722-409838939	ATAC.K2	3.89863	2.24393	2.10269	2.2983	promoter	TraesCS1A02G234400
ATAC	1A:410150508-410150737	ATAC.K2	0.723456	0.567741	0.0382307	0.0611249	promoter	TraesCS1A02G234600
ATAC	1A:410154556-410155721	ATAC.K4	1.74835	3.2983	3.49174	5.28119	genic	TraesCS1A02G234600
ATAC	1A:41362221-41362559	ATAC.K1	1.86893	4.10936	3.30059	2.2983	promoter	TraesCS1A02G060100
ATAC	1A:41368372-41368813	ATAC.K1	0.462208	3.02795	1.50374	1.84597	promoter	TraesCS1A02G060200
ATAC	1A:41368926-41369182	ATAC.K4	0.080384	0.270353	0.586205	0.977998	promoter	TraesCS1A02G060200
ATAC	1A:41371556-41371818	ATAC.K4	0.482304	1.0003	0.560717	1.467	promoter	TraesCS1A02G060300
ATAC	1A:415296702-415297361	ATAC.K3	8.60109	15.3966	6.80507	4.37654	promoter	TraesCS1A02G235000
ATAC	1A:415634705-415635212	ATAC.K1	0.723456	1.27066	1.74587	1.54035	promoter	TraesCS1A02G235200
ATAC	1A:416536833-416537039	ATAC.K4	0.241152	0.432564	0.573461	0.782399	promoter	TraesCS1A02G235500
ATAC	1A:41741291-41741715	ATAC.K4	1.70816	2.78463	7.07269	5.95356	genic	TraesCS1A02G060600
ATAC	1A:41742081-41742355	ATAC.K4	0.743552	0.675882	2.49774	2.77507	genic	TraesCS1A02G060600
ATAC	1A:41760419-41760546	ATAC.K2	0.783744	0.270353	0.280359	0.158925	promoter	TraesCS1A02G060800
ATAC	1A:418057498-418057650	ATAC.K2	0.763648	0.0811058	0.229384	0.1467	promoter	TraesCS1A02G236100
ATAC	1A:418057825-418057992	ATAC.K2	0.542592	0.189247	0.254872	0.17115	promoter	TraesCS1A02G236100
ATAC	1A:41829328-41829476	ATAC.K3	0.30144	0.729952	0.242128	0.0733499	promoter	TraesCS1A02G060900
ATAC	1A:418600723-418600826	ATAC.K4	0.040192	0.162212	0.267615	0.354524	promoter	TraesCS1A02G236200
ATAC	1A:418917715-418918039	ATAC.K1	0.20096	0.811058	1.00674	0.880198	promoter	TraesCS1A02G236300
ATAC	1A:418936036-418936753	ATAC.K1	3.09479	8.62425	11.7113	8.66751	promoter	TraesCS1A02G236400
ATAC	1A:419029591-419029696	ATAC.K2	0.5024	0.297388	0.229384	0.1467	genic	TraesCS1A02G236600
ATAC	1A:419036186-419036340	ATAC.K4	0.020096	0.0811058	0.280359	0.415649	genic	TraesCS1A02G236600
ATAC	1A:41915321-41915665	ATAC.K2	0.763648	0.270353	0.547974	0.330074	promoter	TraesCS1A02G061300
ATAC	1A:419478064-419479157	ATAC.K1	2.75315	6.00183	8.29607	7.21274	promoter	TraesCS1A02G236700
ATAC	1A:419479470-419479592	ATAC.K4	0.10048	0.351458	0.497	0.684599	promoter	TraesCS1A02G236700
ATAC	1A:42104916-42104991	ATAC.K2	0.221056	0.0811058	0.0254872	0.012225	genic	TraesCS1A02G061500
ATAC	1A:42219771-42219892	ATAC.K4	0.120576	0.108141	0.254872	0.562349	genic	TraesCS1A02G061600
ATAC	1A:42254122-42254353	ATAC.K4	0.844032	0.324423	0.828333	1.35697	genic	TraesCS1A02G061700
ATAC	1A:424800052-424800499	ATAC.K4	2.63258	3.16313	6.95799	7.92179	promoter	TraesCS1A02G238400
ATAC	1A:42505342-42505619	ATAC.K3	1.46701	1.98709	1.5802	0.660149	promoter	TraesCS1A02G062000
ATAC	1A:425258195-425258392	ATAC.K2	1.80864	1.12196	0.611692	0.366749	genic	TraesCS1A02G238700
ATAC	1A:425259039-425259535	ATAC.K2	2.90387	0.838093	1.56746	0.904648	genic	TraesCS1A02G238700
ATAC	1A:425259932-425260018	ATAC.K2	0.823936	0.162212	0.254872	0.256725	genic	TraesCS1A02G238700
ATAC	1A:425260375-425260537	ATAC.K2	1.76845	0.378494	0.611692	0.134475	genic	TraesCS1A02G238700
ATAC	1A:425261459-425261792	ATAC.K2	4.42112	0.784023	0.688153	0.562349	genic	TraesCS1A02G238700
ATAC	1A:42547839-42548003	ATAC.K3	0.622976	0.865128	0.35682	0.22005	genic	TraesCS1A02G062100
ATAC	1A:42548016-42548398	ATAC.K4	0.884224	1.28418	2.43402	3.14182	genic	TraesCS1A02G062100
ATAC	1A:425681755-425682756	ATAC.K2	19.9352	16.4915	13.5337	9.37656	promoter	TraesCS1A02G238800
ATAC	1A:425712911-425713436	ATAC.K4	1.76845	2.32503	4.473	4.38877	promoter	TraesCS1A02G238900
ATAC	1A:42603122-42603283	ATAC.K2	0.5024	0.216282	0.152923	0.2445	genic	TraesCS1A02G062200
ATAC	1A:42603895-42604080	ATAC.K3	0.542592	1.56805	0.280359	0.293399	promoter	TraesCS1A02G062200
ATAC	1A:426304241-426304333	ATAC.K2	0.944512	0.675882	0.242128	0.354524	genic	TraesCS1A02G239000
ATAC	1A:42642295-42642419	ATAC.K1	0.442112	1.27066	1.27436	1.38142	promoter	TraesCS1A02G062400
ATAC	1A:426517470-426517884	ATAC.K2	4.70247	3.13609	2.47225	2.6406	promoter	TraesCS1A02G239100
ATAC	1A:426536882-426537189	ATAC.K2	2.41152	1.21659	1.23613	1.19805	promoter	TraesCS1A02G239300
ATAC	1A:42684210-42684324	ATAC.K3	0.381824	0.594776	0.0254872	0.012225	promoter	TraesCS1A02G062600
ATAC	1A:42685511-42685927	ATAC.K2	1.5072	0.51367	0.0127436	0.02445	promoter	TraesCS1A02G062600
ATAC	1A:426875002-426875575	ATAC.K4	0.542592	0.540705	1.35082	1.10025	genic	TraesCS1A02G239500
ATAC	1A:426876584-426876833	ATAC.K2	0.844032	0.351458	0.331333	0.183375	promoter	TraesCS1A02G239500
ATAC	1A:426886122-426886675	ATAC.K4	0.80384	1.3788	2.71438	2.11492	promoter	TraesCS1A02G239700
ATAC	1A:42693435-42693720	ATAC.K2	1.06509	0.811058	0.127436	0.12225	promoter	TraesCS1A02G062700
ATAC	1A:42694893-42695306	ATAC.K2	2.41152	1.40583	0.35682	0.611249	promoter	TraesCS1A02G062700
ATAC	1A:42719123-42719382	ATAC.K3	0.582784	0.675882	0.089205	0.1467	promoter	TraesCS1A02G062900
ATAC	1A:42719533-42719638	ATAC.K3	0.180864	0.216282	0.0127436	0.012225	promoter	TraesCS1A02G062900
ATAC	1A:42720390-42720509	ATAC.K2	0.422016	0.270353	0.101949	0.02445	promoter	TraesCS1A02G062900
ATAC	1A:42720769-42721086	ATAC.K3	0.844032	1.29769	0.0764615	0.02445	promoter	TraesCS1A02G062900
ATAC	1A:42721-42832	ATAC.K1	0.040192	0.216282	0.331333	0.12225	genic	TraesCS1A02G000100
ATAC	1A:427811245-427811397	ATAC.K4	0.140672	0.0811058	0.624435	0.525674	genic	TraesCS1A02G240500
ATAC	1A:428236100-428236274	ATAC.K4	0.020096	0.0270353	0.165667	0.26895	promoter	TraesCS1A02G240900
ATAC	1A:429002057-429002650	ATAC.K1	1.14547	5.1367	8.95874	8.06849	genic	TraesCS1A02G241400
ATAC	1A:429002750-429002874	ATAC.K1	0.30144	0.946234	1.82233	1.13692	genic	TraesCS1A02G241400
ATAC	1A:429004819-429005341	ATAC.K1	3.41632	8.92164	7.11092	7.92179	promoter	TraesCS1A02G241400
ATAC	1A:429481923-429482046	ATAC.K4	0.10048	0.216282	0.637179	0.709049	promoter	TraesCS1A02G241500
ATAC	1A:429483055-429483441	ATAC.K1	0.683264	1.67619	2.06446	1.87042	promoter	TraesCS1A02G241500
ATAC	1A:430002428-430002731	ATAC.K1	0.281344	0.865128	0.688153	0.855749	promoter	TraesCS1A02G241700
ATAC	1A:430189983-430190750	ATAC.K2	14.851	7.24545	6.07869	4.96334	promoter	TraesCS1A02G242000
ATAC	1A:430192539-430192874	ATAC.K4	1.10528	1.29769	2.52323	2.95844	promoter	TraesCS1A02G242000
ATAC	1A:430240211-430240602	ATAC.K1	1.22586	2.35207	2.93102	2.13937	promoter	TraesCS1A02G242200
ATAC	1A:430343096-430344408	ATAC.K1	9.0432	18.8976	21.1543	15.7458	promoter	TraesCS1A02G242400
ATAC	1A:430583645-430583828	ATAC.K2	0.90432	0.270353	0.254872	0.330074	promoter	TraesCS1A02G242500
ATAC	1A:430612974-430613177	ATAC.K3	1.16557	1.12196	0.917538	0.623474	promoter	TraesCS1A02G242700
ATAC	1A:430626058-430626447	ATAC.K1	2.69287	5.48816	5.91302	5.99024	promoter	TraesCS1A02G242900
ATAC	1A:431784189-431785111	ATAC.K4	2.57229	1.86543	5.22487	4.69439	promoter	TraesCS1A02G243400
ATAC	1A:431948614-431949095	ATAC.K4	2.55219	1.3788	6.62666	9.15651	genic	TraesCS1A02G243500
ATAC	1A:431949782-431950389	ATAC.K4	1.20576	1.54101	2.79084	3.69194	genic	TraesCS1A02G243500
ATAC	1A:432338434-432338690	ATAC.K2	0.5024	0.0811058	0.127436	0.1467	promoter	TraesCS1A02G243900
ATAC	1A:432531214-432531294	ATAC.K2	0.241152	0.0811058	0.114692	0.012225	promoter	TraesCS1A02G244100
ATAC	1A:432560271-432560578	ATAC.K1	3.5168	7.62394	6.20612	6.03914	promoter	TraesCS1A02G244300
ATAC	1A:432561129-432561632	ATAC.K3	3.85843	9.30013	3.02023	1.30807	promoter	TraesCS1A02G244300
ATAC	1A:432627878-432627943	ATAC.K2	0.462208	0.108141	0.101949	0.1467	promoter	TraesCS1A02G244500
ATAC	1A:432765649-432765856	ATAC.K4	0.10048	0.297388	0.943025	0.953548	promoter	TraesCS1A02G244700
ATAC	1A:432851328-432852149	ATAC.K3	12.6806	19.9791	13.5592	9.16873	promoter	TraesCS1A02G244800
ATAC	1A:432956651-432957526	ATAC.K4	5.60679	7.27249	12.2976	13.692	genic	TraesCS1A02G244900
ATAC	1A:434425113-434425328	ATAC.K4	0.010048	0.0675882	0.152923	0.232275	genic	TraesCS1A02G245300
ATAC	1A:434638481-434638861	ATAC.K4	0.60288	0.878646	1.46551	1.29585	promoter	TraesCS1A02G245500
ATAC	1A:436386952-436387453	ATAC.K1	0.70336	1.24362	1.75861	1.49145	promoter	TraesCS1A02G246200
ATAC	1A:436420830-436421256	ATAC.K4	2.83354	3.59569	6.26984	6.95601	promoter	TraesCS1A02G246300
ATAC	1A:436427319-436427653	ATAC.K2	5.26515	2.55483	2.53597	1.84597	promoter	TraesCS1A02G246400
ATAC	1A:436427907-436428114	ATAC.K2	3.59719	0.892164	0.395051	0.366749	promoter	TraesCS1A02G246500
ATAC	1A:436429114-436429422	ATAC.K2	4.48141	1.27066	1.17241	1.03912	promoter	TraesCS1A02G246500
ATAC	1A:438688669-438689006	ATAC.K4	0.562688	0.811058	1.35082	1.14915	promoter	TraesCS1A02G247200
ATAC	1A:438701011-438701358	ATAC.K1	0.462208	0.946234	1.22338	0.806849	promoter	TraesCS1A02G247400
ATAC	1A:439930283-439930645	ATAC.K4	0.462208	0.648846	1.5802	1.14915	genic	TraesCS1A02G247800
ATAC	1A:439932163-439932903	ATAC.K1	1.10528	2.48724	1.94977	2.57947	promoter	TraesCS1A02G247800
ATAC	1A:440075917-440076014	ATAC.K4	0.140672	0.0540705	0.433282	0.660149	promoter	TraesCS1A02G248100
ATAC	1A:440412614-440413175	ATAC.K4	6.93312	5.56926	11.0869	11.7482	genic	TraesCS1A02G248300
ATAC	1A:440414189-440414545	ATAC.K4	1.20576	0.946234	6.07869	6.76041	genic	TraesCS1A02G248300
ATAC	1A:440449545-440449711	ATAC.K4	0.010048	0.162212	0.127436	0.476774	genic	TraesCS1A02G248400
ATAC	1A:440801946-440802606	ATAC.K4	0.60288	0.594776	2.2811	4.02202	promoter	TraesCS1A02G248700
ATAC	1A:441031508-441031594	ATAC.K2	0.462208	0.270353	0.101949	0.232275	promoter	TraesCS1A02G249000
ATAC	1A:441185585-441186271	ATAC.K4	2.61248	4.78524	7.5442	7.17606	promoter	TraesCS1A02G249300
ATAC	1A:441244953-441245256	ATAC.K1	0.040192	0.392011	0.484256	0.403424	promoter	TraesCS1A02G249400
ATAC	1A:441750851-441751005	ATAC.K2	1.24595	0.97327	0.395051	0.317849	promoter	TraesCS1A02G249500
ATAC	1A:441752722-441754062	ATAC.K1	6.73216	12.9499	15.2541	12.824	genic	TraesCS1A02G249500
ATAC	1A:441763729-441764150	ATAC.K3	1.14547	2.59539	1.51649	1.50367	promoter	TraesCS1A02G249600
ATAC	1A:441835046-441835402	ATAC.K2	1.30624	0.540705	0.764615	0.476774	promoter	TraesCS1A02G249900
ATAC	1A:442469888-442470221	ATAC.K2	5.72736	2.28448	2.21738	1.79707	promoter	TraesCS1A02G250700
ATAC	1A:442606158-442606603	ATAC.K1	1.24595	2.50076	3.05846	2.445	promoter	TraesCS1A02G251100
ATAC	1A:443128736-443128947	ATAC.K1	0.341632	0.675882	1.00674	0.941323	genic	TraesCS1A02G251500
ATAC	1A:443659729-443659863	ATAC.K4	0.040192	0.108141	0.280359	0.440099	promoter	TraesCS1A02G251800
ATAC	1A:44367503-44367620	ATAC.K4	0.281344	0.51367	0.879307	0.941323	promoter	TraesCS1A02G063300
ATAC	1A:443706118-443706501	ATAC.K4	1.14547	0.729952	2.2811	1.96822	promoter	TraesCS1A02G251900
ATAC	1A:444121733-444121919	ATAC.K1	1.30624	2.93333	2.34482	2.37165	promoter	TraesCS1A02G252300
ATAC	1A:444135877-444136266	ATAC.K4	0.20096	0.378494	1.27436	1.69927	promoter	TraesCS1A02G252600
ATAC	1A:444146690-444146860	ATAC.K4	0.120576	0.216282	0.203897	0.550124	promoter	TraesCS1A02G252700
ATAC	1A:444169045-444169269	ATAC.K2	0.743552	0.243317	0.165667	0.440099	promoter	TraesCS1A02G252800
ATAC	1A:444767803-444768126	ATAC.K2	2.77325	2.08172	1.59295	1.21027	promoter	TraesCS1A02G253200
ATAC	1A:444935825-444936113	ATAC.K1	0.221056	0.648846	0.815589	0.880198	promoter	TraesCS1A02G253300
ATAC	1A:444936318-444936630	ATAC.K1	0.140672	0.554223	0.688153	0.513449	promoter	TraesCS1A02G253300
ATAC	1A:445257888-445258143	ATAC.K3	0.984705	0.97327	0.331333	0.440099	genic	TraesCS1A02G253400
ATAC	1A:445260232-445260393	ATAC.K3	0.60288	0.959752	0.484256	0.22005	genic	TraesCS1A02G253400
ATAC	1A:445260596-445260892	ATAC.K3	1.76845	1.85192	0.560717	0.366749	genic	TraesCS1A02G253400
ATAC	1A:445260975-445261198	ATAC.K3	0.924416	1.0003	0.165667	0.1467	genic	TraesCS1A02G253400
ATAC	1A:445265219-445265388	ATAC.K1	0.120576	0.986787	1.18515	0.635699	genic	TraesCS1A02G253400
ATAC	1A:445266834-445267198	ATAC.K3	6.97332	7.92133	2.30659	1.24695	promoter	TraesCS1A02G253400
ATAC	1A:445268845-445269197	ATAC.K2	3.45651	2.54131	1.09595	0.819074	genic	TraesCS1A02G253400
ATAC	1A:445274909-445275010	ATAC.K4	0.120576	0.189247	0.611692	0.366749	genic	TraesCS1A02G253400
ATAC	1A:445277033-445277116	ATAC.K2	0.261248	0.0405529	0.101949	0.012225	promoter	TraesCS1A02G253400
ATAC	1A:445277183-445277632	ATAC.K2	2.19047	1.27066	1.05772	0.696824	promoter	TraesCS1A02G253400
ATAC	1A:445523558-445523923	ATAC.K4	0.160768	0.189247	0.85382	1.0269	genic	TraesCS1A02G253600
ATAC	1A:445525195-445525522	ATAC.K2	1.0249	0.405529	0.497	0.403424	promoter	TraesCS1A02G253600
ATAC	1A:445549445-445549733	ATAC.K2	0.643072	0.270353	0.229384	0.611249	promoter	TraesCS1A02G254000
ATAC	1A:445877668-445878636	ATAC.K4	4.80295	5.32595	14.3365	12.5795	promoter	TraesCS1A02G254200
ATAC	1A:445878749-445878856	ATAC.K1	0.180864	0.324423	0.71364	0.440099	promoter	TraesCS1A02G254200
ATAC	1A:445884908-445885428	ATAC.K4	0.341632	0.79754	1.84782	1.65037	genic	TraesCS1A02G254200
ATAC	1A:446132383-446133144	ATAC.K3	3.57709	7.21842	1.45277	1.54035	promoter	TraesCS1A02G254600
ATAC	1A:446234518-446234984	ATAC.K4	2.65267	1.10845	3.19864	3.01957	promoter	TraesCS1A02G254800
ATAC	1A:446235063-446235218	ATAC.K2	1.14547	0.540705	0.331333	0.158925	promoter	TraesCS1A02G254800
ATAC	1A:446552173-446552385	ATAC.K1	0.482304	1.10845	1.41454	1.4181	promoter	TraesCS1A02G255000
ATAC	1A:447002103-447002574	ATAC.K1	1.4871	3.70383	5.47974	5.72129	promoter	TraesCS1A02G255100
ATAC	1A:447646762-447646868	ATAC.K2	0.743552	0.405529	0.0764615	0.22005	promoter	TraesCS1A02G255400
ATAC	1A:448035404-448035565	ATAC.K4	0.221056	0.243317	0.71364	0.794624	genic	TraesCS1A02G255800
ATAC	1A:448036600-448036915	ATAC.K4	0.140672	0.2298	1.7841	2.01712	genic	TraesCS1A02G255800
ATAC	1A:448895161-448895665	ATAC.K4	1.86893	1.02734	2.08995	2.7384	promoter	TraesCS1A02G256100
ATAC	1A:448897380-448897581	ATAC.K2	1.0249	0.567741	0.382307	0.525674	promoter	TraesCS1A02G256100
ATAC	1A:448899009-448899217	ATAC.K3	0.823936	1.2301	0.17841	0.0977998	genic	TraesCS1A02G256100
ATAC	1A:448899327-448899599	ATAC.K2	1.68806	1.52749	0.866563	0.880198	genic	TraesCS1A02G256100
ATAC	1A:448916347-448916653	ATAC.K3	2.27085	4.00122	2.11543	1.2714	promoter	TraesCS1A02G256300
ATAC	1A:448916963-448917063	ATAC.K2	1.42682	0.919199	0.509743	0.599024	promoter	TraesCS1A02G256300
ATAC	1A:449144599-449144926	ATAC.K2	1.10528	0.432564	0.331333	0.0488999	promoter	TraesCS1A02G256500
ATAC	1A:449201424-449201871	ATAC.K3	1.0048	2.56835	1.52923	1.40587	promoter	TraesCS1A02G256800
ATAC	1A:449506404-449506661	ATAC.K4	0.261248	0.270353	0.662666	1.3692	promoter	TraesCS1A02G257000
ATAC	1A:449518785-449519023	ATAC.K4	0.582784	0.946234	1.77136	1.52812	genic	TraesCS1A02G257200
ATAC	1A:449520143-449520280	ATAC.K2	1.34643	1.04086	0.726384	0.525674	promoter	TraesCS1A02G257200
ATAC	1A:449556881-449557352	ATAC.K4	1.26605	1.56805	3.93777	3.55747	genic	TraesCS1A02G257300
ATAC	1A:449623001-449623202	ATAC.K3	1.42682	1.4599	0.458769	0.513449	promoter	TraesCS1A02G257400
ATAC	1A:449623409-449623596	ATAC.K4	0.160768	0.135176	0.700897	0.525674	promoter	TraesCS1A02G257400
ATAC	1A:449624621-449624941	ATAC.K3	1.40672	1.78433	0.790102	0.635699	genic	TraesCS1A02G257400
ATAC	1A:449625845-449626068	ATAC.K3	0.60288	1.18955	0.267615	0.464549	genic	TraesCS1A02G257400
ATAC	1A:449664961-449665303	ATAC.K2	1.10528	0.919199	0.382307	0.464549	genic	TraesCS1A02G257500
ATAC	1A:449666199-449666584	ATAC.K2	4.20007	1.9195	0.688153	0.721274	promoter	TraesCS1A02G257500
ATAC	1A:449666904-449667112	ATAC.K2	1.06509	0.79754	0.229384	0.22005	promoter	TraesCS1A02G257500
ATAC	1A:449807160-449807526	ATAC.K1	1.06509	2.27096	3.12218	2.77507	promoter	TraesCS1A02G257700
ATAC	1A:449807639-449807814	ATAC.K2	0.884224	0.486635	0.471512	0.391199	promoter	TraesCS1A02G257700
ATAC	1A:449811388-449811960	ATAC.K4	1.28614	0.756987	4.21812	5.09782	promoter	TraesCS1A02G257800
ATAC	1A:449812886-449813152	ATAC.K4	0.482304	0.162212	2.25561	2.28607	genic	TraesCS1A02G257800
ATAC	1A:449829696-449829781	ATAC.K3	0.120576	0.51367	0.0127436	0.0366749	genic	TraesCS1A02G257900
ATAC	1A:449831138-449831465	ATAC.K3	0.844032	2.3791	0.981256	0.892423	promoter	TraesCS1A02G257900
ATAC	1A:450097164-450097320	ATAC.K2	0.5024	0.162212	0.089205	0.17115	promoter	TraesCS1A02G258300
ATAC	1A:4506829-4507316	ATAC.K1	0.442112	1.97357	1.65667	0.929098	promoter	TraesCS1A02G008200
ATAC	1A:451280754-451280879	ATAC.K1	0.080384	0.378494	0.968512	0.672374	genic	TraesCS1A02G258400
ATAC	1A:451281189-451281290	ATAC.K4	0.060288	0.202764	0.841076	0.488999	genic	TraesCS1A02G258400
ATAC	1A:451282484-451282878	ATAC.K1	1.04499	2.70353	2.33207	2.53057	promoter	TraesCS1A02G258400
ATAC	1A:451619658-451619863	ATAC.K4	0.482304	0.432564	1.29984	1.21027	promoter	TraesCS1A02G258500
ATAC	1A:452020388-452021219	ATAC.K1	1.22586	3.46051	3.58095	3.11737	genic	TraesCS1A02G258800
ATAC	1A:452027101-452027519	ATAC.K3	1.21581	1.29769	0.586205	0.599024	promoter	TraesCS1A02G258900
ATAC	1A:452284905-452285263	ATAC.K2	5.47616	2.51428	2.76536	2.99512	promoter	TraesCS1A02G259200
ATAC	1A:452752850-452753616	ATAC.K2	5.60679	2.87926	5.12292	4.77997	promoter	TraesCS1A02G259500
ATAC	1A:454335368-454335763	ATAC.K1	0.683264	1.89247	1.46551	1.00245	promoter	TraesCS1A02G260300
ATAC	1A:454523237-454523469	ATAC.K1	0.241152	1.17603	0.828333	0.525674	genic	TraesCS1A02G260500
ATAC	1A:454528079-454528233	ATAC.K3	0.723456	0.892164	0.458769	0.281175	promoter	TraesCS1A02G260600
ATAC	1A:4547917-4548021	ATAC.K4	0.120576	0.0270353	0.191154	0.525674	promoter	TraesCS1A02G008300
ATAC	1A:45500930-45501084	ATAC.K2	0.5024	0.297388	0.280359	0.12225	promoter	TraesCS1A02G063800
ATAC	1A:45501242-45501363	ATAC.K2	0.462208	0.0540705	0.101949	0.1467	promoter	TraesCS1A02G063800
ATAC	1A:455041686-455041988	ATAC.K2	2.35123	0.405529	0.35682	0.207825	promoter	TraesCS1A02G261100
ATAC	1A:455045091-455045509	ATAC.K3	0.261248	1.21659	0.305846	0.1956	promoter	TraesCS1A02G261100
ATAC	1A:4553946-4554105	ATAC.K2	0.321536	0.189247	0.0509743	0.110025	genic	TraesCS1A02G008300
ATAC	1A:45541298-45541574	ATAC.K4	0.432064	1.13548	1.56746	2.43277	promoter	TraesCS1A02G064000
ATAC	1A:45542303-45542580	ATAC.K1	1.42682	3.51458	2.54872	2.23717	promoter	TraesCS1A02G064000
ATAC	1A:45544402-45545019	ATAC.K4	1.08518	3.46051	4.39653	6.14916	genic	TraesCS1A02G064000
ATAC	1A:45545504-45546116	ATAC.K1	1.36653	5.02856	5.87479	6.55259	genic	TraesCS1A02G064000
ATAC	1A:455601797-455602347	ATAC.K1	2.13018	4.83931	3.38979	3.30074	promoter	TraesCS1A02G261200
ATAC	1A:455604860-455605045	ATAC.K2	1.14547	0.756987	0.458769	0.488999	promoter	TraesCS1A02G261200
ATAC	1A:455822901-455823674	ATAC.K2	13.3638	8.79998	2.37031	1.16137	promoter	TraesCS1A02G261400
ATAC	1A:455823762-455823909	ATAC.K2	2.5321	2.13579	0.509743	0.22005	promoter	TraesCS1A02G261400
ATAC	1A:456232380-456233018	ATAC.K4	1.0048	1.16252	3.13492	5.13449	promoter	TraesCS1A02G261500
ATAC	1A:456324285-456324445	ATAC.K1	0.120576	0.702917	0.458769	0.293399	promoter	TraesCS1A02G261800
ATAC	1A:456326019-456326292	ATAC.K2	2.19047	1.24362	0.165667	0.342299	promoter	TraesCS1A02G261800
ATAC	1A:456944931-456945009	ATAC.K2	1.06509	0.79754	0.802845	0.440099	promoter	TraesCS1A02G262300
ATAC	1A:45790940-45791246	ATAC.K4	0.140672	0.0540705	1.38905	2.60392	promoter	TraesCS1A02G064100
ATAC	1A:458396931-458397080	ATAC.K2	1.10528	0.378494	0.471512	0.488999	genic	TraesCS1A02G262900
ATAC	1A:458562873-458563033	ATAC.K3	2.04979	2.04116	1.35082	1.06357	promoter	TraesCS1A02G263300
ATAC	1A:458566306-458566419	ATAC.K1	0.442112	0.554223	1.05772	0.709049	genic	TraesCS1A02G263300
ATAC	1A:459098253-459098469	ATAC.K3	1.12538	1.4599	0.280359	0.293399	genic	TraesCS1A02G263600
ATAC	1A:459099451-459099946	ATAC.K2	3.29575	2.62242	0.866563	0.464549	genic	TraesCS1A02G263600
ATAC	1A:459188137-459188254	ATAC.K3	1.0048	1.17603	0.828333	0.488999	promoter	TraesCS1A02G263700
ATAC	1A:459305191-459305513	ATAC.K4	0.864128	0.79754	1.91154	2.2983	promoter	TraesCS1A02G263900
ATAC	1A:459307164-459308310	ATAC.K1	0.321536	4.75821	4.473	5.34232	genic	TraesCS1A02G264000
ATAC	1A:459952906-459953861	ATAC.K4	6.18957	3.73087	8.46174	8.74086	promoter	TraesCS1A02G264400
ATAC	1A:460279593-460279955	ATAC.K3	3.19527	6.21811	2.01349	0.867973	promoter	TraesCS1A02G264500
ATAC	1A:460280068-460280670	ATAC.K3	4.05939	5.98831	2.82907	1.44255	promoter	TraesCS1A02G264500
ATAC	1A:460329871-460330313	ATAC.K1	1.26605	3.01443	5.04646	4.70662	promoter	TraesCS1A02G264600
ATAC	1A:460637284-460638052	ATAC.K1	4.56179	7.48877	11.1506	7.86066	promoter	TraesCS1A02G264900
ATAC	1A:460669490-460670015	ATAC.K1	2.27085	5.46112	5.18664	4.60882	promoter	TraesCS1A02G265000
ATAC	1A:460861362-460861833	ATAC.K4	0.783744	0.892164	2.31933	2.37165	genic	TraesCS1A02G265200
ATAC	1A:460968095-460968327	ATAC.K1	0.080384	1.02734	1.1979	0.709049	genic	TraesCS1A02G265300
ATAC	1A:460990630-460991026	ATAC.K3	0.241152	1.0003	0.509743	0.12225	promoter	TraesCS1A02G265400
ATAC	1A:461044963-461045305	ATAC.K1	0.743552	1.90599	1.51649	1.96822	promoter	TraesCS1A02G265500
ATAC	1A:461351717-461351838	ATAC.K3	0.422016	0.838093	0.203897	0.134475	promoter	TraesCS1A02G265700
ATAC	1A:461356349-461356851	ATAC.K1	3.59719	8.73239	8.44899	7.45724	promoter	TraesCS1A02G265800
ATAC	1A:461372353-461372899	ATAC.K3	1.60768	5.5963	3.24961	2.26162	promoter	TraesCS1A02G265900
ATAC	1A:461522503-461522619	ATAC.K2	0.5024	0.378494	0.165667	0.12225	genic	TraesCS1A02G266000
ATAC	1A:461523114-461523304	ATAC.K4	0.080384	0.324423	0.369564	0.537899	genic	TraesCS1A02G266000
ATAC	1A:461770419-461770591	ATAC.K2	0.482304	0.121659	0.216641	0.12225	genic	TraesCS1A02G266200
ATAC	1A:461770706-461771028	ATAC.K4	0.140672	0.243317	0.586205	0.855749	genic	TraesCS1A02G266200
ATAC	1A:462004894-462005463	ATAC.K4	1.16557	1.4599	3.58095	3.26407	genic	TraesCS1A02G266600
ATAC	1A:462005966-462006273	ATAC.K2	2.29095	0.97327	1.988	1.65037	promoter	TraesCS1A02G266600
ATAC	1A:46202493-46202671	ATAC.K4	0.010048	0.135176	0.35682	0.440099	promoter	TraesCS1A02G064300
ATAC	1A:462120490-462120619	ATAC.K4	0.361728	0.324423	1.13418	0.574574	promoter	TraesCS1A02G266700
ATAC	1A:462120935-462122008	ATAC.K4	4.40103	1.97357	9.65963	9.19318	promoter	TraesCS1A02G266700
ATAC	1A:462122137-462122278	ATAC.K2	1.10528	0.378494	0.471512	0.501224	promoter	TraesCS1A02G266700
ATAC	1A:462123583-462123798	ATAC.K4	0.40192	1.08141	1.92428	2.87287	genic	TraesCS1A02G266700
ATAC	1A:462124276-462124437	ATAC.K2	1.38662	1.3788	0.598948	1.33252	genic	TraesCS1A02G266700
ATAC	1A:462136082-462136891	ATAC.K4	1.56749	2.25744	10.0292	10.2323	promoter	TraesCS1A02G266800
ATAC	1A:462390082-462390398	ATAC.K2	1.06509	0.621811	0.305846	0.293399	promoter	TraesCS1A02G267100
ATAC	1A:462400666-462400824	ATAC.K2	0.462208	0.108141	0.127436	0.134475	genic	TraesCS1A02G267200
ATAC	1A:462402058-462402142	ATAC.K2	0.221056	0.0540705	0.0127436	0.0733499	promoter	TraesCS1A02G267200
ATAC	1A:46253498-46253769	ATAC.K2	0.5024	0.108141	0.101949	0.12225	genic	TraesCS1A02G064400
ATAC	1A:462751321-462751424	ATAC.K4	0.221056	0.270353	0.509743	0.696824	promoter	TraesCS1A02G267700
ATAC	1A:462752513-462752780	ATAC.K1	0.361728	0.756987	0.802845	1.0269	promoter	TraesCS1A02G267700
ATAC	1A:462776994-462777285	ATAC.K2	3.57709	2.54131	0.726384	1.06357	genic	TraesCS1A02G267800
ATAC	1A:462778607-462779159	ATAC.K1	3.88858	5.96128	8.76758	7.38389	promoter	TraesCS1A02G267800
ATAC	1A:462779492-462779781	ATAC.K2	2.85363	1.51397	0.484256	0.513449	promoter	TraesCS1A02G267800
ATAC	1A:462779933-462780005	ATAC.K2	0.844032	0.351458	0.242128	0.366749	promoter	TraesCS1A02G267800
ATAC	1A:462799823-462800288	ATAC.K2	1.0048	0.486635	0.305846	0.26895	promoter	TraesCS1A02G267900
ATAC	1A:463154610-463154934	ATAC.K2	1.32634	0.405529	0.293102	0.293399	promoter	TraesCS1A02G268200
ATAC	1A:463155169-463155497	ATAC.K2	1.46701	1.29769	0.471512	1.0758	promoter	TraesCS1A02G268200
ATAC	1A:463191649-463191953	ATAC.K2	1.28614	1.21659	0.611692	1.29585	promoter	TraesCS1A02G268300
ATAC	1A:463461707-463462230	ATAC.K2	6.64173	5.60982	3.24961	2.94622	promoter	TraesCS1A02G268800
ATAC	1A:463462405-463463033	ATAC.K2	8.74176	6.33977	2.42128	3.42299	promoter	TraesCS1A02G268800
ATAC	1A:463463166-463463537	ATAC.K2	4.15987	2.97388	1.45277	1.79707	promoter	TraesCS1A02G268800
ATAC	1A:463463776-463464053	ATAC.K2	2.10003	0.392011	0.420538	0.378974	promoter	TraesCS1A02G268800
ATAC	1A:463525283-463525536	ATAC.K2	1.16557	0.540705	0.0764615	0.452324	promoter	TraesCS1A02G268900
ATAC	1A:463817285-463817537	ATAC.K4	0.663168	1.18955	1.46551	1.69927	promoter	TraesCS1A02G269100
ATAC	1A:463923206-463923281	ATAC.K1	0.060288	0.581258	0.53523	0.427874	genic	TraesCS1A02G269300
ATAC	1A:463923443-463923685	ATAC.K1	0.70336	2.3791	2.2811	1.52812	genic	TraesCS1A02G269300
ATAC	1A:463958227-463958692	ATAC.K4	1.20576	1.78433	2.14092	3.01957	genic	TraesCS1A02G269600
ATAC	1A:464091316-464091555	ATAC.K2	1.28614	0.486635	0.726384	0.305624	promoter	TraesCS1A02G270000
ATAC	1A:464115308-464115596	ATAC.K2	1.04499	0.378494	0.203897	0.012225	promoter	TraesCS1A02G270100
ATAC	1A:464246202-464246435	ATAC.K2	0.80384	0.378494	0.331333	0.501224	promoter	TraesCS1A02G270200
ATAC	1A:464809697-464809814	ATAC.K2	0.924416	0.432564	0.203897	0.2445	genic	TraesCS1A02G270700
ATAC	1A:464810929-464811400	ATAC.K2	4.94362	2.54131	3.479	2.35942	promoter	TraesCS1A02G270700
ATAC	1A:464840395-464840995	ATAC.K2	3.87853	1.27066	0.993999	1.34475	promoter	TraesCS1A02G270800
ATAC	1A:464912392-464912681	ATAC.K2	2.19047	0.621811	0.407795	0.293399	genic	TraesCS1A02G271000
ATAC	1A:465106144-465106523	ATAC.K4	0.70336	0.243317	1.03223	1.49145	genic	TraesCS1A02G271300
ATAC	1A:465128750-465128991	ATAC.K2	1.16557	0.0540705	0.0637179	0.207825	promoter	TraesCS1A02G271400
ATAC	1A:465279626-465279753	ATAC.K4	0.261248	0.162212	1.54197	1.2714	promoter	TraesCS1A02G271700
ATAC	1A:465281322-465282182	ATAC.K4	2.61248	1.35176	3.67015	3.60637	promoter	TraesCS1A02G271700
ATAC	1A:465283863-465284160	ATAC.K4	2.11008	2.13579	4.52397	4.14427	promoter	TraesCS1A02G271800
ATAC	1A:465341090-465341197	ATAC.K2	0.542592	0.108141	0.17841	0.0977998	genic	TraesCS1A02G272000
ATAC	1A:465341280-465341468	ATAC.K2	0.884224	0.108141	0.216641	0.110025	genic	TraesCS1A02G272000
ATAC	1A:465341576-465341657	ATAC.K2	0.422016	0.0540705	0.089205	0.0977998	genic	TraesCS1A02G272000
ATAC	1A:465343467-465343607	ATAC.K2	0.70336	0.297388	0.17841	0.0977998	promoter	TraesCS1A02G272000
ATAC	1A:465344362-465344947	ATAC.K2	1.78854	0.540705	1.37631	1.45477	promoter	TraesCS1A02G272000
ATAC	1A:465345064-465345233	ATAC.K2	0.723456	0.135176	0.0509743	0.0977998	promoter	TraesCS1A02G272000
ATAC	1A:465345338-465345581	ATAC.K2	1.10528	0.337941	0.446025	0.342299	promoter	TraesCS1A02G272000
ATAC	1A:465452611-465453054	ATAC.K4	0.462208	0.838093	4.00148	4.31542	genic	TraesCS1A02G272100
ATAC	1A:465456360-465456439	ATAC.K3	0.763648	1.04086	0.331333	0.281175	promoter	TraesCS1A02G272100
ATAC	1A:465456587-465456971	ATAC.K2	3.19527	1.74377	1.47826	0.867973	promoter	TraesCS1A02G272100
ATAC	1A:465457434-465457533	ATAC.K2	1.26605	0.865128	0.586205	0.330074	promoter	TraesCS1A02G272100
ATAC	1A:465458048-465458323	ATAC.K2	2.19047	0.784023	1.05772	0.709049	promoter	TraesCS1A02G272100
ATAC	1A:465494504-465494575	ATAC.K2	0.65312	0.364976	0.293102	0.158925	promoter	TraesCS1A02G272300
ATAC	1A:465494649-465495091	ATAC.K3	7.59629	9.39475	3.41528	1.956	promoter	TraesCS1A02G272300
ATAC	1A:465495236-465495626	ATAC.K3	2.57229	3.86604	3.0712	1.63815	promoter	TraesCS1A02G272300
ATAC	1A:465496293-465496467	ATAC.K1	0.361728	1.97357	1.22338	0.892423	genic	TraesCS1A02G272300
ATAC	1A:465512056-465512368	ATAC.K2	3.07469	2.54131	2.66341	1.62592	promoter	TraesCS1A02G272500
ATAC	1A:465524162-465524279	ATAC.K4	0.020096	0.0270353	0.267615	0.330074	genic	TraesCS1A02G272600
ATAC	1A:466926519-466927133	ATAC.K4	5.20487	4.12288	6.01497	9.09538	genic	TraesCS1A02G273100
ATAC	1A:467159971-467160184	ATAC.K2	1.14547	0.216282	0.242128	0.2445	promoter	TraesCS1A02G273200
ATAC	1A:467162278-467162667	ATAC.K4	0.723456	0.351458	0.866563	1.83375	promoter	TraesCS1A02G273300
ATAC	1A:467184093-467184599	ATAC.K2	9.22407	2.56835	4.52397	4.15649	promoter	TraesCS1A02G273500
ATAC	1A:467193277-467193396	ATAC.K2	1.34643	0.0540705	0.484256	0.158925	genic	TraesCS1A02G273600
ATAC	1A:467194148-467194434	ATAC.K2	2.79335	1.10845	0.841076	0.929098	promoter	TraesCS1A02G273600
ATAC	1A:467257160-467257488	ATAC.K3	0.30144	2.35207	0.395051	0.586799	genic	TraesCS1A02G273800
ATAC	1A:467259854-467260612	ATAC.K3	2.73306	9.30013	5.23761	4.81664	promoter	TraesCS1A02G273900
ATAC	1A:468605506-468605620	ATAC.K3	0.442112	0.675882	0.305846	0.0488999	genic	TraesCS1A02G274400
ATAC	1A:468608980-468609248	ATAC.K3	3.79815	5.81258	3.55546	2.7384	promoter	TraesCS1A02G274400
ATAC	1A:468609842-468610365	ATAC.K3	3.23546	10.5032	2.94377	1.54035	promoter	TraesCS1A02G274400
ATAC	1A:468685115-468685484	ATAC.K2	0.924416	0.486635	0.382307	0.440099	promoter	TraesCS1A02G274500
ATAC	1A:468823566-468824144	ATAC.K4	0.964609	2.17634	4.473	4.05869	promoter	TraesCS1A02G274600
ATAC	1A:469308850-469308933	ATAC.K3	0.10048	0.811058	0.140179	0.0488999	promoter	TraesCS1A02G275000
ATAC	1A:469310888-469311267	ATAC.K3	4.76275	5.08263	1.32533	0.415649	genic	TraesCS1A02G275000
ATAC	1A:469371969-469372423	ATAC.K2	13.4442	9.66511	7.78633	5.80686	promoter	TraesCS1A02G275200
ATAC	1A:469376180-469376340	ATAC.K3	0.783744	2.62242	0.815589	0.378974	genic	TraesCS1A02G275300
ATAC	1A:469376598-469376749	ATAC.K1	0.341632	0.878646	1.2871	1.0758	promoter	TraesCS1A02G275300
ATAC	1A:469586987-469587327	ATAC.K4	0.5024	0.459599	1.64392	1.65037	promoter	TraesCS1A02G275400
ATAC	1A:469643524-469644581	ATAC.K4	1.94931	3.13609	5.77284	8.15406	promoter	TraesCS1A02G275500
ATAC	1A:469645260-469645846	ATAC.K4	3.19527	2.67649	4.10343	6.45479	genic	TraesCS1A02G275500
ATAC	1A:470685977-470686328	ATAC.K2	1.42682	0.919199	0.624435	0.574574	promoter	TraesCS1A02G275800
ATAC	1A:470686948-470687023	ATAC.K2	0.261248	0.0270353	0.0764615	0.02445	promoter	TraesCS1A02G275800
ATAC	1A:471263274-471263530	ATAC.K2	1.36653	0.567741	1.14692	0.684599	promoter	TraesCS1A02G275900
ATAC	1A:471265451-471265646	ATAC.K2	0.984705	0.189247	0.254872	0.1956	genic	TraesCS1A02G276000
ATAC	1A:471265773-471265956	ATAC.K4	0.080384	0.0540705	0.611692	0.782399	genic	TraesCS1A02G276000
ATAC	1A:471266777-471266863	ATAC.K2	0.411968	0.0811058	0.0764615	0.0733499	promoter	TraesCS1A02G276000
ATAC	1A:471727901-471728821	ATAC.K4	1.94931	2.81167	6.56294	5.30564	promoter	TraesCS1A02G276800
ATAC	1A:47194331-47194768	ATAC.K4	3.89863	4.92042	8.42351	9.55993	promoter	TraesCS1A02G064800
ATAC	1A:47203221-47203363	ATAC.K4	0.120576	0.0811058	0.573461	0.342299	genic	TraesCS1A02G064900
ATAC	1A:472170618-472171359	ATAC.K2	1.58758	0.297388	0.458769	0.366749	promoter	TraesCS1A02G277200
ATAC	1A:472550222-472550434	ATAC.K2	1.74835	0.567741	0.573461	1.03912	promoter	TraesCS1A02G277400
ATAC	1A:472551613-472552224	ATAC.K2	2.25075	0.702917	0.917538	1.38142	genic	TraesCS1A02G277400
ATAC	1A:473011547-473011756	ATAC.K4	0.060288	0.405529	0.293102	0.696824	genic	TraesCS1A02G277500
ATAC	1A:473037248-473037329	ATAC.K2	0.663168	0.297388	0.152923	0.354524	promoter	TraesCS1A02G277700
ATAC	1A:47378358-47378675	ATAC.K1	0.984705	2.40614	2.53597	2.71395	promoter	TraesCS1A02G065200
ATAC	1A:474202272-474202467	ATAC.K1	0.241152	0.648846	1.35082	1.00245	promoter	TraesCS1A02G278200
ATAC	1A:474293387-474293740	ATAC.K2	7.33504	6.56957	3.96325	4.10759	promoter	TraesCS1A02G278600
ATAC	1A:474427046-474427754	ATAC.K2	2.55219	1.9195	1.15967	1.33252	genic	TraesCS1A02G278700
ATAC	1A:474449993-474450278	ATAC.K3	2.81344	3.6768	2.61243	1.49145	genic	TraesCS1A02G278900
ATAC	1A:475307069-475307518	ATAC.K2	4.50151	3.48755	2.86731	2.3961	promoter	TraesCS1A02G279300
ATAC	1A:47584555-47584659	ATAC.K2	0.462208	0.297388	0.216641	0.12225	genic	TraesCS1A02G065300
ATAC	1A:47587262-47587625	ATAC.K2	1.4871	0.364976	0.53523	0.256725	genic	TraesCS1A02G065300
ATAC	1A:476901310-476901439	ATAC.K4	0.120576	0.108141	0.35682	1.05135	promoter	TraesCS1A02G279400
ATAC	1A:477014577-477014960	ATAC.K2	2.95411	2.02764	1.87331	1.19805	promoter	TraesCS1A02G279800
ATAC	1A:477016068-477016156	ATAC.K3	0.120576	0.51367	0.127436	0.0488999	genic	TraesCS1A02G279800
ATAC	1A:477667121-477667464	ATAC.K1	0.482304	1.02734	0.981256	1.38142	promoter	TraesCS1A02G280200
ATAC	1A:477728792-477729225	ATAC.K4	1.26605	0.432564	1.38905	2.79952	promoter	TraesCS1A02G280300
ATAC	1A:477734850-477735851	ATAC.K2	20.6386	10.9087	12.1319	11.1736	genic	TraesCS1A02G280400
ATAC	1A:47800451-47800837	ATAC.K2	1.60768	1.16252	0.331333	0.501224	genic	TraesCS1A02G065400
ATAC	1A:47806080-47806887	ATAC.K3	4.38093	9.89491	5.17389	4.70662	promoter	TraesCS1A02G065500
ATAC	1A:47808415-47808487	ATAC.K2	0.462208	0.324423	0.17841	0.0977998	promoter	TraesCS1A02G065500
ATAC	1A:478256574-478256737	ATAC.K4	1.66797	1.02734	1.79684	2.53057	genic	TraesCS1A02G280500
ATAC	1A:478260620-478260911	ATAC.K3	4.07949	5.77203	1.70764	2.17605	promoter	TraesCS1A02G280500
ATAC	1A:478354598-478354966	ATAC.K4	0.442112	0.51367	0.815589	1.62592	genic	TraesCS1A02G280600
ATAC	1A:478450148-478450826	ATAC.K2	14.7002	5.73148	5.00823	5.03669	promoter	TraesCS1A02G280700
ATAC	1A:478452458-478452582	ATAC.K2	1.14547	0.297388	0.318589	0.26895	genic	TraesCS1A02G280700
ATAC	1A:478565955-478566455	ATAC.K4	1.66797	1.16252	2.982	2.4939	promoter	TraesCS1A02G280900
ATAC	1A:478628762-478629074	ATAC.K3	2.45171	6.19108	4.70238	2.445	promoter	TraesCS1A02G281000
ATAC	1A:479545165-479546384	ATAC.K4	1.36653	1.0003	4.40928	5.79464	genic	TraesCS1A02G281100
ATAC	1A:479817317-479818036	ATAC.K1	5.00391	10.7871	10.0292	9.85333	promoter	TraesCS1A02G281300
ATAC	1A:479819674-479819806	ATAC.K4	0.180864	0.432564	0.497	0.819074	genic	TraesCS1A02G281300
ATAC	1A:480428612-480428917	ATAC.K4	0.271296	0.756987	0.89205	1.18582	genic	TraesCS1A02G281600
ATAC	1A:480581740-480581960	ATAC.K2	0.663168	0.297388	0.35682	0.134475	promoter	TraesCS1A02G282100
ATAC	1A:480602282-480602618	ATAC.K4	0.522496	0.243317	1.77136	1.40587	promoter	TraesCS1A02G282400
ATAC	1A:480605720-480606173	ATAC.K2	2.19047	0.784023	0.662666	0.831299	promoter	TraesCS1A02G282600
ATAC	1A:480805981-480806225	ATAC.K2	1.76845	0.51367	0.267615	0.440099	promoter	TraesCS1A02G283100
ATAC	1A:480806492-480806766	ATAC.K2	4.46131	3.32534	1.70764	1.1736	promoter	TraesCS1A02G283100
ATAC	1A:480807233-480807326	ATAC.K2	0.793792	0.702917	0.369564	0.232275	promoter	TraesCS1A02G283100
ATAC	1A:480808122-480808303	ATAC.K2	1.40672	1.0003	0.700897	0.770174	promoter	TraesCS1A02G283100
ATAC	1A:4808416-4808780	ATAC.K4	6.5714	7.40766	14.3748	19.1076	promoter	TraesCS1A02G008500
ATAC	1A:480931714-480931983	ATAC.K2	1.94931	0.784023	0.981256	1.57702	promoter	TraesCS1A02G283300
ATAC	1A:480933226-480933371	ATAC.K2	0.864128	0.270353	0.280359	0.2445	promoter	TraesCS1A02G283300
ATAC	1A:480936026-480936254	ATAC.K4	0.522496	0.594776	0.943025	1.18582	promoter	TraesCS1A02G283400
ATAC	1A:480937942-480938205	ATAC.K4	0.783744	0.297388	1.22338	1.1247	promoter	TraesCS1A02G283400
ATAC	1A:4811355-4811892	ATAC.K1	7.71687	16.8159	14.7953	14.511	promoter	TraesCS1A02G008500
ATAC	1A:4812615-4812975	ATAC.K3	4.40103	11.1926	6.16789	7.37166	genic	TraesCS1A02G008500
ATAC	1A:481671246-481671701	ATAC.K2	1.28614	0.811058	0.649922	0.733499	promoter	TraesCS1A02G283900
ATAC	1A:481673915-481674262	ATAC.K2	1.32634	0.500152	0.280359	0.403424	promoter	TraesCS1A02G283900
ATAC	1A:481756780-481757326	ATAC.K4	0.663168	1.10845	1.74587	2.4939	genic	TraesCS1A02G284100
ATAC	1A:481931499-481931742	ATAC.K3	2.21056	2.97388	1.26161	1.23472	promoter	TraesCS1A02G284500
ATAC	1A:482243756-482243841	ATAC.K2	0.683264	0.270353	0.305846	0.134475	genic	TraesCS1A02G284600
ATAC	1A:482276904-482277228	ATAC.K1	2.25075	5.92072	5.25035	6.00246	promoter	TraesCS1A02G284800
ATAC	1A:482328147-482328622	ATAC.K4	1.38662	0.405529	0.943025	2.04157	promoter	TraesCS1A02G284900
ATAC	1A:482335474-482336795	ATAC.K1	5.26515	11.1656	7.39128	15.0123	genic	TraesCS1A02G285000
ATAC	1A:482336911-482337338	ATAC.K1	1.86893	2.8387	1.64392	3.50857	genic	TraesCS1A02G285000
ATAC	1A:482765758-482765854	ATAC.K2	0.562688	0.419047	0.127436	0.366749	promoter	TraesCS1A02G285300
ATAC	1A:482767774-482767951	ATAC.K2	0.522496	0.243317	0.152923	0.12225	genic	TraesCS1A02G285400
ATAC	1A:482813186-482813541	ATAC.K2	1.56749	0.432564	0.203897	0.0977998	genic	TraesCS1A02G285700
ATAC	1A:482964453-482964949	ATAC.K2	4.60199	1.97357	2.03897	1.93155	promoter	TraesCS1A02G285900
ATAC	1A:482965845-482966029	ATAC.K2	1.04499	0.892164	0.497	0.26895	promoter	TraesCS1A02G285900
ATAC	1A:483024558-483025118	ATAC.K3	4.38093	5.43409	2.66341	1.5159	promoter	TraesCS1A02G286100
ATAC	1A:483604333-483604695	ATAC.K2	1.38662	1.21659	0.739128	1.1247	promoter	TraesCS1A02G286600
ATAC	1A:483606203-483606412	ATAC.K2	0.582784	0.0811058	0.254872	0.207825	genic	TraesCS1A02G286600
ATAC	1A:483648861-483649441	ATAC.K4	1.78854	2.16282	3.61918	4.76774	promoter	TraesCS1A02G286700
ATAC	1A:483659781-483660469	ATAC.K4	0.482304	0.216282	0.993999	1.83375	promoter	TraesCS1A02G286800
ATAC	1A:483680800-483680893	ATAC.K4	0.622976	1.10845	0.866563	1.49145	promoter	TraesCS1A02G286900
ATAC	1A:483859951-483860925	ATAC.K2	7.95802	1.78433	1.27436	1.94377	promoter	TraesCS1A02G287000
ATAC	1A:483861562-483861695	ATAC.K2	1.0048	0.540705	0.471512	0.696824	promoter	TraesCS1A02G287000
ATAC	1A:483924284-483924724	ATAC.K3	2.81344	5.32595	3.479	2.31052	genic	TraesCS1A02G287100
ATAC	1A:484301705-484302265	ATAC.K4	3.5168	2.46021	5.32682	6.41811	promoter	TraesCS1A02G287300
ATAC	1A:484328771-484328907	ATAC.K2	0.90432	0.432564	0.369564	0.476774	genic	TraesCS1A02G287400
ATAC	1A:484336859-484336928	ATAC.K2	0.964609	0.675882	0.433282	0.330074	genic	TraesCS1A02G287400
ATAC	1A:484999506-484999684	ATAC.K2	1.04499	0.324423	0.637179	0.427874	genic	TraesCS1A02G287500
ATAC	1A:485214995-485215147	ATAC.K2	0.783744	0.189247	0.254872	0.2445	genic	TraesCS1A02G288000
ATAC	1A:485215638-485216176	ATAC.K2	3.35603	1.81136	1.52923	1.3203	promoter	TraesCS1A02G288000
ATAC	1A:48576105-48576231	ATAC.K2	1.22586	0.621811	0.407795	0.415649	promoter	TraesCS1A02G065700
ATAC	1A:48581447-48581560	ATAC.K2	0.562688	0.297388	0.254872	0.12225	genic	TraesCS1A02G065700
ATAC	1A:48582640-48582708	ATAC.K2	0.361728	0.216282	0.140179	0.0733499	genic	TraesCS1A02G065700
ATAC	1A:48584297-48584388	ATAC.K3	0.341632	0.392011	0.0382307	0.22005	genic	TraesCS1A02G065700
ATAC	1A:48591188-48591301	ATAC.K2	1.39667	0.216282	0.509743	0.574574	genic	TraesCS1A02G065700
ATAC	1A:486052077-486052192	ATAC.K1	0.020096	0.621811	0.395051	0.501224	genic	TraesCS1A02G288800
ATAC	1A:486052365-486052657	ATAC.K1	0.140672	1.27066	1.12143	1.03912	genic	TraesCS1A02G288800
ATAC	1A:486338104-486338235	ATAC.K4	0.160768	0.351458	0.586205	0.672374	promoter	TraesCS1A02G289000
ATAC	1A:486667415-486668019	ATAC.K4	0.683264	0.905681	1.09595	1.55257	promoter	TraesCS1A02G289400
ATAC	1A:486743866-486744107	ATAC.K3	0.582784	1.13548	0.280359	0.488999	promoter	TraesCS1A02G289600
ATAC	1A:486815122-486815394	ATAC.K2	1.98951	1.16252	0.586205	0.819074	promoter	TraesCS1A02G289900
ATAC	1A:486818198-486818592	ATAC.K3	2.33114	3.27127	1.07046	1.39365	promoter	TraesCS1A02G290000
ATAC	1A:486952678-486953224	ATAC.K4	3.55699	1.78433	3.64466	5.40344	promoter	TraesCS1A02G290200
ATAC	1A:486956827-486957244	ATAC.K3	2.59239	3.2172	2.08995	1.3203	promoter	TraesCS1A02G290300
ATAC	1A:487009967-487010850	ATAC.K2	10.8317	3.37941	4.19264	2.6406	promoter	TraesCS1A02G290400
ATAC	1A:48703630-48703954	ATAC.K4	0.422016	0.459599	1.04497	1.68705	genic	TraesCS1A02G065900
ATAC	1A:48704534-48704667	ATAC.K1	0.341632	0.838093	1.09595	0.721274	genic	TraesCS1A02G065900
ATAC	1A:48705684-48705822	ATAC.K1	0.442112	1.13548	1.27436	1.3203	genic	TraesCS1A02G065900
ATAC	1A:487078533-487078687	ATAC.K2	0.462208	0.0540705	0.114692	0.02445	genic	TraesCS1A02G290600
ATAC	1A:487088574-487088898	ATAC.K2	2.93402	2.67649	1.94977	1.60147	promoter	TraesCS1A02G290700
ATAC	1A:487101333-487101493	ATAC.K4	0.020096	0.121659	0.35682	0.672374	genic	TraesCS1A02G290800
ATAC	1A:487316727-487317534	ATAC.K1	3.81824	11.4765	11.9535	9.08316	promoter	TraesCS1A02G291000
ATAC	1A:487333802-487334293	ATAC.K4	1.26605	2.05468	3.49174	4.51102	promoter	TraesCS1A02G291100
ATAC	1A:487335733-487335938	ATAC.K4	0.643072	1.21659	1.5802	1.9071	promoter	TraesCS1A02G291100
ATAC	1A:487465619-487466009	ATAC.K4	0.5024	0.594776	2.00074	2.1027	promoter	TraesCS1A02G291200
ATAC	1A:487571533-487571606	ATAC.K2	0.70336	0.202764	0.267615	0.158925	promoter	TraesCS1A02G291600
ATAC	1A:487608730-487609097	ATAC.K2	4.0393	2.28448	2.24287	1.72372	promoter	TraesCS1A02G291800
ATAC	1A:48769178-48769513	ATAC.K1	1.88903	3.86604	3.87405	4.35209	promoter	TraesCS1A02G066100
ATAC	1A:48770290-48770451	ATAC.K4	0.643072	1.0003	1.82233	1.87042	promoter	TraesCS1A02G066100
ATAC	1A:48783594-48784140	ATAC.K3	11.5753	17.1404	8.37253	6.12471	promoter	TraesCS1A02G066200
ATAC	1A:488063440-488063773	ATAC.K2	5.84794	0.97327	0.53523	0.806849	promoter	TraesCS1A02G292300
ATAC	1A:488064247-488064422	ATAC.K2	3.27565	0.648846	0.254872	0.26895	promoter	TraesCS1A02G292300
ATAC	1A:488203824-488204306	ATAC.K2	1.28614	0.405529	0.981256	0.696824	genic	TraesCS1A02G292900
ATAC	1A:488234163-488234673	ATAC.K2	1.74835	1.51397	0.71364	0.611249	promoter	TraesCS1A02G293200
ATAC	1A:489263840-489264226	ATAC.K3	6.37044	6.46143	3.35156	3.56969	promoter	TraesCS1A02G294100
ATAC	1A:489393877-489394257	ATAC.K4	0.10048	0.567741	1.22338	2.28607	promoter	TraesCS1A02G294600
ATAC	1A:48982124-48982521	ATAC.K2	1.40672	0.784023	0.446025	0.293399	genic	TraesCS1A02G066400
ATAC	1A:489922264-489922356	ATAC.K2	0.261248	0.0540705	0.0127436	0.0366749	genic	TraesCS1A02G294800
ATAC	1A:48994584-48994898	ATAC.K3	2.13018	2.16282	0.930281	1.2225	genic	TraesCS1A02G066521
ATAC	1A:48997201-48997644	ATAC.K4	0.823936	1.44639	1.92428	2.42055	genic	TraesCS1A02G066521
ATAC	1A:490409916-490410293	ATAC.K4	1.78854	1.35176	3.03297	4.37654	promoter	TraesCS1A02G295300
ATAC	1A:490411334-490411621	ATAC.K4	1.24595	1.40583	2.24287	3.28852	promoter	TraesCS1A02G295300
ATAC	1A:490509619-490510219	ATAC.K2	5.82784	1.78433	1.88605	2.82397	genic	TraesCS1A02G295600
ATAC	1A:490510388-490510470	ATAC.K2	0.884224	0.202764	0.254872	0.452324	genic	TraesCS1A02G295600
ATAC	1A:490515315-490515387	ATAC.K2	0.783744	0.378494	0.305846	0.1467	genic	TraesCS1A02G295600
ATAC	1A:490795573-490795743	ATAC.K1	0.542592	1.29769	1.32533	0.525674	genic	TraesCS1A02G295800
ATAC	1A:490796714-490797538	ATAC.K3	7.99821	14.7748	14.0434	5.83131	promoter	TraesCS1A02G295800
ATAC	1A:490890486-490890766	ATAC.K4	1.46701	0.621811	2.54872	1.98045	promoter	TraesCS1A02G295900
ATAC	1A:490890953-490891112	ATAC.K2	1.08518	0.162212	0.267615	0.1956	promoter	TraesCS1A02G295900
ATAC	1A:490891433-490891538	ATAC.K2	0.622976	0.243317	0.165667	0.1467	promoter	TraesCS1A02G295900
ATAC	1A:490893295-490893889	ATAC.K4	1.68806	0.756987	7.77358	8.54526	promoter	TraesCS1A02G295900
ATAC	1A:490894507-490895232	ATAC.K4	1.21581	0.648846	8.39802	9.90223	genic	TraesCS1A02G295900
ATAC	1A:49094036-49094751	ATAC.K3	4.15987	9.00274	6.30807	5.28119	promoter	TraesCS1A02G066700
ATAC	1A:49095176-49095281	ATAC.K1	0.140672	0.689399	0.917538	0.378974	promoter	TraesCS1A02G066700
ATAC	1A:49095594-49095988	ATAC.K3	1.36653	2.3791	2.30659	1.11247	promoter	TraesCS1A02G066700
ATAC	1A:49096434-49096740	ATAC.K1	0.522496	2.41966	1.45277	1.3692	promoter	TraesCS1A02G066700
ATAC	1A:49101945-49102271	ATAC.K4	0.281344	0.675882	2.58695	3.54524	genic	TraesCS1A02G066800
ATAC	1A:491127066-491127322	ATAC.K2	2.512	1.13548	1.04497	0.733499	promoter	TraesCS1A02G296100
ATAC	1A:491134698-491135038	ATAC.K1	1.56749	3.58217	4.17989	4.43767	genic	TraesCS1A02G296200
ATAC	1A:491139118-491139429	ATAC.K1	1.06509	1.78433	2.44677	2.33497	promoter	TraesCS1A02G296200
ATAC	1A:491153057-491153753	ATAC.K2	18.2673	13.1121	10.7428	9.77998	promoter	TraesCS1A02G296300
ATAC	1A:491310142-491311165	ATAC.K2	5.34554	0.702917	2.26836	3.11737	genic	TraesCS1A02G296500
ATAC	1A:49149169-49149277	ATAC.K3	1.10528	1.97357	1.01949	0.660149	promoter	TraesCS1A02G066900
ATAC	1A:492002166-492002456	ATAC.K2	1.84883	0.865128	0.917538	0.647924	promoter	TraesCS1A02G296800
ATAC	1A:492045385-492045809	ATAC.K4	2.5321	0.97327	1.89879	2.61615	promoter	TraesCS1A02G296900
ATAC	1A:492270856-492271795	ATAC.K1	0.944512	11.1656	14.7316	7.54281	promoter	TraesCS1A02G297400
ATAC	1A:492274402-492275232	ATAC.K1	2.52205	12.0307	12.4632	6.43034	promoter	TraesCS1A02G297500
ATAC	1A:49244733-49245356	ATAC.K3	1.57754	2.51428	1.52923	1.0269	promoter	TraesCS1A02G067000
ATAC	1A:49254429-49254540	ATAC.K3	0.5024	0.540705	0.17841	0.1467	promoter	TraesCS1A02G067200
ATAC	1A:492652978-492653442	ATAC.K4	2.04979	1.27066	4.74061	5.63572	promoter	TraesCS1A02G297600
ATAC	1A:492809367-492810030	ATAC.K2	15.5141	13.1932	8.34704	6.89489	promoter	TraesCS1A02G297800
ATAC	1A:493200664-493200827	ATAC.K2	0.763648	0.621811	0.216641	0.305624	promoter	TraesCS1A02G297900
ATAC	1A:493205133-493205743	ATAC.K1	3.11488	7.8943	7.40402	6.06359	promoter	TraesCS1A02G298000
ATAC	1A:493217101-493217657	ATAC.K3	7.93792	13.8421	7.88827	3.45967	promoter	TraesCS1A02G298200
ATAC	1A:493219406-493220455	ATAC.K3	24.4769	24.2101	15.4962	11.1736	genic	TraesCS1A02G298200
ATAC	1A:493263677-493264606	ATAC.K3	13.7055	16.9781	5.11017	6.13694	promoter	TraesCS1A02G298300
ATAC	1A:493264784-493264937	ATAC.K2	1.24595	0.324423	0.203897	0.12225	promoter	TraesCS1A02G298300
ATAC	1A:493282932-493283123	ATAC.K3	1.12538	1.27066	0.420538	0.403424	genic	TraesCS1A02G298400
ATAC	1A:493500914-493501056	ATAC.K2	1.46701	0.189247	0.458769	0.501224	genic	TraesCS1A02G298600
ATAC	1A:493501486-493501590	ATAC.K2	0.864128	0.216282	0.127436	0.134475	genic	TraesCS1A02G298600
ATAC	1A:493502962-493503037	ATAC.K2	0.783744	0.297388	0.216641	0.1956	promoter	TraesCS1A02G298600
ATAC	1A:493505559-493505717	ATAC.K2	2.08999	1.13548	0.497	0.391199	promoter	TraesCS1A02G298600
ATAC	1A:49352429-49352593	ATAC.K2	1.34643	0.594776	0.433282	0.317849	promoter	TraesCS1A02G067700
ATAC	1A:49353107-49353619	ATAC.K2	1.88903	0.594776	0.53523	0.366749	promoter	TraesCS1A02G067700
ATAC	1A:49361026-49361247	ATAC.K1	0.080384	0.811058	0.407795	0.672374	promoter	TraesCS1A02G067900
ATAC	1A:493735883-493736390	ATAC.K4	0.60288	0.486635	1.6949	1.28362	promoter	TraesCS1A02G298800
ATAC	1A:493736942-493737032	ATAC.K2	0.221056	0.0540705	0.0382307	0.012225	promoter	TraesCS1A02G298800
ATAC	1A:493813361-493813853	ATAC.K1	3.11488	7.02917	7.79907	7.79954	promoter	TraesCS1A02G298900
ATAC	1A:493925730-493925984	ATAC.K3	2.0096	3.77142	1.41454	1.10025	promoter	TraesCS1A02G299100
ATAC	1A:494022845-494023668	ATAC.K3	1.98951	5.70444	1.21064	0.770174	promoter	TraesCS1A02G299200
ATAC	1A:494023836-494024120	ATAC.K3	0.381824	3.0685	0.203897	0.366749	promoter	TraesCS1A02G299200
ATAC	1A:494392262-494392547	ATAC.K4	2.77325	1.02734	2.65066	2.77507	promoter	TraesCS1A02G299300
ATAC	1A:494392811-494392968	ATAC.K2	0.723456	0.135176	0.242128	0.403424	promoter	TraesCS1A02G299300
ATAC	1A:494435483-494435973	ATAC.K4	2.45171	3.04147	9.46848	10.0123	promoter	TraesCS1A02G299400
ATAC	1A:494447997-494448369	ATAC.K1	0.321536	1.8384	1.27436	1.7115	genic	TraesCS1A02G299500
ATAC	1A:494797359-494797487	ATAC.K2	1.89907	1.43287	0.688153	0.843524	promoter	TraesCS1A02G300000
ATAC	1A:494797685-494797809	ATAC.K2	1.42682	1.24362	0.764615	0.599024	promoter	TraesCS1A02G300000
ATAC	1A:494798097-494798592	ATAC.K4	3.15507	3.37941	9.34104	8.96091	promoter	TraesCS1A02G300000
ATAC	1A:495129209-495129468	ATAC.K2	1.76845	1.02734	0.802845	1.1736	promoter	TraesCS1A02G300100
ATAC	1A:495191219-495191645	ATAC.K2	4.86323	4.24454	2.40854	2.11492	genic	TraesCS1A02G300200
ATAC	1A:495192319-495192554	ATAC.K2	2.89383	0.675882	0.509743	0.599024	genic	TraesCS1A02G300200
ATAC	1A:495193553-495194120	ATAC.K2	9.68628	0.702917	0.726384	0.831299	promoter	TraesCS1A02G300200
ATAC	1A:495194239-495194319	ATAC.K2	0.964609	0.135176	0.127436	0.26895	promoter	TraesCS1A02G300200
ATAC	1A:495194422-495194619	ATAC.K2	1.70816	1.02734	0.624435	0.721274	promoter	TraesCS1A02G300200
ATAC	1A:495283864-495284362	ATAC.K2	18.0864	14.545	2.84182	1.6137	promoter	TraesCS1A02G300300
ATAC	1A:495284827-495284972	ATAC.K2	1.41677	0.905681	0.318589	0.158925	promoter	TraesCS1A02G300300
ATAC	1A:495304498-495305009	ATAC.K4	1.10528	0.594776	1.55472	2.6406	promoter	TraesCS1A02G300400
ATAC	1A:495306150-495306444	ATAC.K4	0.522496	0.405529	0.331333	1.00245	promoter	TraesCS1A02G300400
ATAC	1A:495319885-495320028	ATAC.K2	1.28614	0.51367	0.267615	0.403424	promoter	TraesCS1A02G300500
ATAC	1A:495333336-495334283	ATAC.K4	4.78285	2.24393	4.5622	5.30564	promoter	TraesCS1A02G300700
ATAC	1A:495456410-495457032	ATAC.K1	2.57229	7.56987	9.96548	6.98046	promoter	TraesCS1A02G300900
ATAC	1A:495578141-495578793	ATAC.K4	1.24595	0.486635	4.03971	5.67239	genic	TraesCS1A02G301100
ATAC	1A:495580024-495580516	ATAC.K2	8.64128	1.77081	5.92576	5.79464	promoter	TraesCS1A02G301100
ATAC	1A:495596942-495597675	ATAC.K4	3.91872	0.675882	8.05394	9.96336	promoter	TraesCS1A02G301200
ATAC	1A:495697057-495697146	ATAC.K3	0.241152	1.17603	0.458769	0.1956	promoter	TraesCS1A02G301300
ATAC	1A:495697531-495697645	ATAC.K3	0.160768	1.64915	0.484256	0.317849	promoter	TraesCS1A02G301300
ATAC	1A:495698088-495698291	ATAC.K3	0.80384	3.73087	0.802845	0.525674	promoter	TraesCS1A02G301300
ATAC	1A:495705564-495705868	ATAC.K2	5.34554	3.97418	2.26836	1.98045	promoter	TraesCS1A02G301500
ATAC	1A:495706734-495706898	ATAC.K2	1.5072	0.540705	0.598948	0.537899	genic	TraesCS1A02G301600
ATAC	1A:496047397-496047611	ATAC.K3	0.90432	0.892164	0.280359	0.647924	genic	TraesCS1A02G301800
ATAC	1A:496047745-496047975	ATAC.K2	2.512	1.81136	0.662666	1.05135	genic	TraesCS1A02G301800
ATAC	1A:496051337-496051619	ATAC.K4	0.442112	0.378494	1.24887	2.28607	promoter	TraesCS1A02G301800
ATAC	1A:496089609-496090518	ATAC.K2	6.73216	1.10845	2.58695	3.33742	promoter	TraesCS1A02G302100
ATAC	1A:496143404-496143842	ATAC.K4	2.81344	1.75729	4.71512	8.71641	promoter	TraesCS1A02G302300
ATAC	1A:496169094-496169631	ATAC.K2	1.5072	0.756987	0.637179	0.501224	genic	TraesCS1A02G302400
ATAC	1A:496293340-496293477	ATAC.K4	0.70336	0.756987	1.5802	1.50367	promoter	TraesCS1A02G302500
ATAC	1A:496296642-496298246	ATAC.K4	8.19917	4.37971	17.4969	17.0661	genic	TraesCS1A02G302500
ATAC	1A:496304081-496304603	ATAC.K4	0.763648	0.756987	3.54271	4.62104	genic	TraesCS1A02G302600
ATAC	1A:496443082-496443554	ATAC.K1	1.56749	3.7579	4.02697	3.61859	promoter	TraesCS1A02G302800
ATAC	1A:496472924-496473890	ATAC.K4	11.1734	5.38002	12.5779	13.3252	promoter	TraesCS1A02G302900
ATAC	1A:496482312-496482532	ATAC.K2	1.10528	0.729952	0.509743	0.684599	promoter	TraesCS1A02G303000
ATAC	1A:496484233-496484351	ATAC.K2	2.0096	0.51367	0.586205	0.415649	promoter	TraesCS1A02G303000
ATAC	1A:496628055-496628378	ATAC.K2	8.15898	6.5155	1.18515	0.782399	promoter	TraesCS1A02G303100
ATAC	1A:496631060-496631682	ATAC.K2	9.01306	6.27218	4.02697	3.88754	promoter	TraesCS1A02G303100
ATAC	1A:496632246-496632863	ATAC.K1	2.29095	7.75912	10.5007	6.12471	genic	TraesCS1A02G303100
ATAC	1A:496635621-496635835	ATAC.K2	2.37133	1.50046	0.841076	0.745724	genic	TraesCS1A02G303100
ATAC	1A:496635986-496636526	ATAC.K4	1.64787	2.41966	6.37179	9.18096	genic	TraesCS1A02G303100
ATAC	1A:496645829-496646016	ATAC.K2	1.0048	0.486635	0.17841	0.281175	genic	TraesCS1A02G303200
ATAC	1A:497183643-497183807	ATAC.K4	0.823936	1.35176	1.12143	1.93155	promoter	TraesCS1A02G303500
ATAC	1A:497192784-497193131	ATAC.K4	2.25075	3.56865	5.77284	6.94379	promoter	TraesCS1A02G303600
ATAC	1A:497194720-497195136	ATAC.K4	1.64787	1.64915	5.91302	6.98046	promoter	TraesCS1A02G303600
ATAC	1A:497240678-497240856	ATAC.K4	0.241152	0.216282	0.89205	0.770174	genic	TraesCS1A02G303800
ATAC	1A:497278229-497278443	ATAC.K1	1.0249	2.05468	1.70764	2.4939	promoter	TraesCS1A02G303900
ATAC	1A:497343792-497344087	ATAC.K2	0.723456	0.162212	0.203897	0.0488999	promoter	TraesCS1A02G304000
ATAC	1A:497496693-497496894	ATAC.K4	0.120576	0.135176	0.586205	0.513449	genic	TraesCS1A02G304100
ATAC	1A:497498807-497499131	ATAC.K2	1.44691	0.756987	0.547974	0.770174	promoter	TraesCS1A02G304100
ATAC	1A:497509720-497509962	ATAC.K4	0.5024	0.378494	1.92428	2.45722	promoter	TraesCS1A02G304200
ATAC	1A:497588191-497588598	ATAC.K4	0.522496	0.486635	1.14692	1.58925	promoter	TraesCS1A02G304600
ATAC	1A:49770-49886	ATAC.K1	0.341632	1.32473	1.27436	0.880198	genic	TraesCS1A02G000100
ATAC	1A:497749481-497749824	ATAC.K4	0.944512	1.21659	1.82233	2.12715	promoter	TraesCS1A02G304800
ATAC	1A:497758045-497758341	ATAC.K2	3.0345	1.3788	0.777358	0.855749	promoter	TraesCS1A02G304900
ATAC	1A:497760369-497760670	ATAC.K4	0.5024	0.297388	1.82233	3.66749	promoter	TraesCS1A02G304900
ATAC	1A:497762397-497762832	ATAC.K4	1.44691	1.16252	4.5622	5.48902	genic	TraesCS1A02G304900
ATAC	1A:497899546-497899908	ATAC.K1	1.36653	3.13609	3.21138	3.09292	promoter	TraesCS1A02G305300
ATAC	1A:497900546-497900898	ATAC.K3	6.91303	11.909	6.80507	5.53792	promoter	TraesCS1A02G305300
ATAC	1A:497902756-497903410	ATAC.K4	4.90343	2.16282	3.78484	5.11004	genic	TraesCS1A02G305300
ATAC	1A:498161776-498161905	ATAC.K3	1.62778	1.51397	0.509743	0.330074	promoter	TraesCS1A02G305800
ATAC	1A:498172639-498172805	ATAC.K3	0.562688	2.81167	0.790102	0.464549	genic	TraesCS1A02G305900
ATAC	1A:498173033-498173145	ATAC.K3	0.60288	2.18986	1.29984	0.574574	genic	TraesCS1A02G305900
ATAC	1A:498174060-498174424	ATAC.K3	1.24595	4.39323	2.44677	1.57702	genic	TraesCS1A02G306000
ATAC	1A:498175678-498175964	ATAC.K3	8.98292	14.7072	6.38453	3.17849	promoter	TraesCS1A02G306000
ATAC	1A:498176439-498176806	ATAC.K3	3.5369	4.86635	2.37031	1.4181	promoter	TraesCS1A02G306000
ATAC	1A:498796807-498796942	ATAC.K2	0.512448	0.459599	0.101949	0.12225	promoter	TraesCS1A02G307100
ATAC	1A:49898345-49898569	ATAC.K2	0.864128	0.337941	0.305846	0.12225	promoter	TraesCS1A02G068400
ATAC	1A:499178142-499178579	ATAC.K3	1.54739	2.78463	1.66941	0.990223	promoter	TraesCS1A02G307600
ATAC	1A:499179348-499179456	ATAC.K2	1.24595	0.51367	0.420538	0.354524	promoter	TraesCS1A02G307600
ATAC	1A:499442026-499442395	ATAC.K2	5.66708	2.70353	2.54872	1.6137	promoter	TraesCS1A02G307900
ATAC	1A:49961502-49961794	ATAC.K4	1.30624	0.378494	2.15366	1.33252	promoter	TraesCS1A02G068500
ATAC	1A:499617706-499617926	ATAC.K4	0.823936	0.459599	2.01349	2.50612	promoter	TraesCS1A02G308200
ATAC	1A:499620308-499620914	ATAC.K4	2.81344	1.13548	3.10943	4.66994	genic	TraesCS1A02G308300
ATAC	1A:49963186-49963462	ATAC.K1	0.643072	1.81136	1.5802	1.2714	promoter	TraesCS1A02G068500
ATAC	1A:499801104-499801628	ATAC.K4	1.82874	2.27096	7.7481	8.63083	promoter	TraesCS1A02G308900
ATAC	1A:499809107-499809317	ATAC.K2	0.80384	0.486635	0.458769	0.330074	promoter	TraesCS1A02G309000
ATAC	1A:499927337-499927844	ATAC.K2	2.89383	0.621811	0.739128	0.782399	promoter	TraesCS1A02G309100
ATAC	1A:499980726-499981016	ATAC.K4	0.080384	0.0540705	1.52923	2.40832	genic	TraesCS1A02G309200
ATAC	1A:500362314-500362467	ATAC.K2	0.984705	0.648846	0.446025	0.281175	promoter	TraesCS1A02G309500
ATAC	1A:500560724-500560830	ATAC.K4	0.30144	0.324423	0.71364	0.819074	genic	TraesCS1A02G309600
ATAC	1A:500562776-500562918	ATAC.K3	1.26605	2.21689	1.1979	0.709049	genic	TraesCS1A02G309700
ATAC	1A:500823376-500823623	ATAC.K1	0.361728	1.27066	1.03223	0.488999	promoter	TraesCS1A02G309900
ATAC	1A:500835542-500836099	ATAC.K1	0.30144	0.959752	1.60569	0.819074	promoter	TraesCS1A02G310100
ATAC	1A:500842720-500843475	ATAC.K1	8.38004	18.9788	18.8605	19.67	promoter	TraesCS1A02G310200
ATAC	1A:500984048-500984212	ATAC.K3	0.70336	1.40583	0.203897	0.2445	promoter	TraesCS1A02G310400
ATAC	1A:501023874-501024361	ATAC.K2	4.58189	2.40614	2.20464	0.843524	promoter	TraesCS1A02G310500
ATAC	1A:502676543-502677329	ATAC.K4	3.5369	4.47434	11.928	11.4793	promoter	TraesCS1A02G311000
ATAC	1A:502806683-502806849	ATAC.K2	0.683264	0.486635	0.229384	0.0733499	promoter	TraesCS1A02G311100
ATAC	1A:502807310-502807523	ATAC.K3	0.80384	0.892164	0.152923	0.183375	promoter	TraesCS1A02G311100
ATAC	1A:502808810-502809109	ATAC.K4	0.241152	0.135176	1.60569	1.45477	promoter	TraesCS1A02G311100
ATAC	1A:502809462-502810054	ATAC.K4	1.86893	2.73056	3.3643	4.11982	promoter	TraesCS1A02G311100
ATAC	1A:502824597-502825591	ATAC.K1	10.5504	22.5069	18.6184	17.5306	promoter	TraesCS1A02G311200
ATAC	1A:502838909-502839062	ATAC.K4	0.160768	0.216282	0.509743	0.721274	promoter	TraesCS1A02G311300
ATAC	1A:5030115-5030184	ATAC.K3	0.180864	0.162212	0.0127436	0.012225	promoter	TraesCS1A02G008600
ATAC	1A:5032117-5032339	ATAC.K2	0.5024	0.351458	0.127436	0.0977998	promoter	TraesCS1A02G008600
ATAC	1A:503307193-503307776	ATAC.K4	2.73306	4.58248	5.47974	6.36921	promoter	TraesCS1A02G311400
ATAC	1A:503332427-503332924	ATAC.K2	7.25466	2.00061	5.467	5.56237	promoter	TraesCS1A02G311700
ATAC	1A:503378766-503378864	ATAC.K2	0.321536	0.135176	0.0509743	0.0733499	promoter	TraesCS1A02G311900
ATAC	1A:504268114-504268320	ATAC.K4	0.864128	1.56805	1.47826	2.4939	promoter	TraesCS1A02G312300
ATAC	1A:504271157-504271601	ATAC.K2	3.59719	0.892164	1.1979	2.445	promoter	TraesCS1A02G312300
ATAC	1A:504275332-504275495	ATAC.K2	0.542592	0.405529	0.0254872	0.2445	genic	TraesCS1A02G312300
ATAC	1A:504312684-504313013	ATAC.K2	1.12538	0.351458	0.318589	0.586799	promoter	TraesCS1A02G312400
ATAC	1A:504610648-504610899	ATAC.K2	0.70336	0.432564	0.242128	0.488999	promoter	TraesCS1A02G312700
ATAC	1A:504612343-504612610	ATAC.K2	2.15027	0.756987	0.458769	0.342299	promoter	TraesCS1A02G312700
ATAC	1A:504631398-504631723	ATAC.K1	2.06989	5.16374	4.77884	3.64304	promoter	TraesCS1A02G312800
ATAC	1A:504702348-504702576	ATAC.K2	1.06509	0.405529	0.331333	0.1467	promoter	TraesCS1A02G312900
ATAC	1A:505479557-505479695	ATAC.K2	1.24595	0.527188	0.395051	0.452324	genic	TraesCS1A02G313800
ATAC	1A:505481437-505481774	ATAC.K2	2.23066	1.33825	1.38905	0.941323	genic	TraesCS1A02G313900
ATAC	1A:505668661-505669043	ATAC.K1	1.60768	3.89308	4.54946	3.72862	promoter	TraesCS1A02G314100
ATAC	1A:505682605-505682683	ATAC.K2	1.28614	0.621811	0.802845	0.696824	promoter	TraesCS1A02G314200
ATAC	1A:505683031-505683506	ATAC.K2	12.0174	7.61043	7.53145	4.81664	promoter	TraesCS1A02G314200
ATAC	1A:505683893-505684303	ATAC.K2	6.20967	4.00122	3.5682	3.00734	promoter	TraesCS1A02G314200
ATAC	1A:506296901-506297704	ATAC.K2	9.36474	6.40736	1.05772	0.611249	promoter	TraesCS1A02G314500
ATAC	1A:506474204-506474747	ATAC.K2	2.35123	1.08141	0.71364	0.623474	promoter	TraesCS1A02G314800
ATAC	1A:506481097-506481182	ATAC.K2	0.321536	0.162212	0.0509743	0.17115	genic	TraesCS1A02G314900
ATAC	1A:506489363-506489785	ATAC.K2	3.16512	2.91981	2.05172	1.6137	genic	TraesCS1A02G314900
ATAC	1A:506491328-506491483	ATAC.K2	1.30624	0.297388	0.152923	0.0977998	genic	TraesCS1A02G314900
ATAC	1A:506493694-506494238	ATAC.K2	4.94362	3.83901	2.10269	1.83375	promoter	TraesCS1A02G314900
ATAC	1A:506540663-506540906	ATAC.K2	3.23546	1.18955	0.573461	0.611249	promoter	TraesCS1A02G315100
ATAC	1A:506541510-506542092	ATAC.K2	3.37613	1.20307	1.47826	0.757949	genic	TraesCS1A02G315100
ATAC	1A:507002940-507003064	ATAC.K2	1.34643	0.648846	0.67541	0.415649	genic	TraesCS1A02G315400
ATAC	1A:507003363-507004003	ATAC.K2	18.7898	16.0049	11.3928	8.96091	genic	TraesCS1A02G315400
ATAC	1A:507086098-507086525	ATAC.K2	3.17517	2.3791	0.484256	0.403424	promoter	TraesCS1A02G315600
ATAC	1A:507959485-507959594	ATAC.K2	0.683264	0.108141	0.0764615	0.183375	promoter	TraesCS1A02G315800
ATAC	1A:507959746-507959871	ATAC.K2	0.643072	0.135176	0.229384	0.17115	promoter	TraesCS1A02G315800
ATAC	1A:507960176-507960699	ATAC.K2	3.39623	0.297388	0.203897	0.22005	promoter	TraesCS1A02G315800
ATAC	1A:508211435-508211600	ATAC.K1	0.010048	0.0540705	0.152923	0.0733499	promoter	TraesCS1A02G316200
ATAC	1A:50840590-50840792	ATAC.K2	1.01485	0.405529	0.547974	0.391199	promoter	TraesCS1A02G069100
ATAC	1A:50845665-50846002	ATAC.K1	1.86893	2.64946	4.21812	3.22739	promoter	TraesCS1A02G069200
ATAC	1A:508554792-508554907	ATAC.K4	0.261248	0.297388	0.904794	0.427874	genic	TraesCS1A02G317000
ATAC	1A:508836984-508837184	ATAC.K4	0.040192	0.108141	0.203897	0.330074	promoter	TraesCS1A02G317400
ATAC	1A:509012271-509013089	ATAC.K1	0.663168	2.66297	4.74061	4.20539	promoter	TraesCS1A02G317800
ATAC	1A:509033288-509033913	ATAC.K2	3.45651	0.51367	0.904794	0.770174	promoter	TraesCS1A02G317900
ATAC	1A:509034134-509034414	ATAC.K4	0.80384	0.162212	0.85382	0.965773	promoter	TraesCS1A02G317900
ATAC	1A:509036240-509036457	ATAC.K2	0.643072	0.324423	0.127436	0.1467	promoter	TraesCS1A02G317900
ATAC	1A:510285963-510286084	ATAC.K4	0.20096	0.378494	0.280359	1.00245	genic	TraesCS1A02G319100
ATAC	1A:510344680-510345371	ATAC.K4	0.321536	1.10845	4.84256	4.53547	promoter	TraesCS1A02G319200
ATAC	1A:510378105-510378452	ATAC.K3	1.98951	3.40644	2.15366	1.60147	promoter	TraesCS1A02G319600
ATAC	1A:510446188-510446632	ATAC.K3	2.19047	6.67771	2.58695	1.8093	promoter	TraesCS1A02G319700
ATAC	1A:510455294-510455511	ATAC.K4	0.180864	0.135176	0.662666	1.3203	promoter	TraesCS1A02G319900
ATAC	1A:510802576-510802775	ATAC.K4	0.020096	0.0811058	0.089205	0.440099	promoter	TraesCS1A02G320100
ATAC	1A:510803794-510803907	ATAC.K1	0.010048	0.0270353	0.229384	0.02445	genic	TraesCS1A02G320100
ATAC	1A:510828734-510829315	ATAC.K4	0.482304	0.675882	4.60043	6.80931	genic	TraesCS1A02G320200
ATAC	1A:510831123-510831504	ATAC.K4	3.93882	2.91981	4.60043	6.68706	promoter	TraesCS1A02G320200
ATAC	1A:511004916-511005412	ATAC.K2	3.79815	1.18955	2.61243	2.3472	promoter	TraesCS1A02G320300
ATAC	1A:511010208-511010389	ATAC.K2	0.592832	0.162212	0.242128	0.1956	genic	TraesCS1A02G320400
ATAC	1A:511406832-511407837	ATAC.K3	12.2787	11.6792	7.23835	4.07092	genic	TraesCS1A02G320900
ATAC	1A:511481137-511481530	ATAC.K1	0.984705	2.27096	2.70164	2.31052	promoter	TraesCS1A02G321000
ATAC	1A:511499685-511499999	ATAC.K3	2.11008	5.97479	1.77136	1.88265	promoter	TraesCS1A02G321100
ATAC	1A:511501151-511502146	ATAC.K3	5.16467	25.8322	11.8133	14.67	genic	TraesCS1A02G321100
ATAC	1A:511636077-511636395	ATAC.K2	2.5321	1.18955	1.07046	1.49145	promoter	TraesCS1A02G321400
ATAC	1A:512464209-512464426	ATAC.K3	1.94931	3.86604	1.44002	2.07825	promoter	TraesCS1A02G321600
ATAC	1A:512643762-512643881	ATAC.K2	0.844032	0.540705	0.471512	0.1956	promoter	TraesCS1A02G321700
ATAC	1A:512644163-512644413	ATAC.K4	1.22586	0.770505	1.77136	2.42055	promoter	TraesCS1A02G321700
ATAC	1A:512645664-512646120	ATAC.K2	10.1485	4.89338	1.56746	2.23717	genic	TraesCS1A02G321700
ATAC	1A:512654648-512654727	ATAC.K2	0.622976	0.378494	0.242128	0.22005	promoter	TraesCS1A02G321900
ATAC	1A:512658538-512658688	ATAC.K2	0.984705	0.608293	0.700897	0.415649	genic	TraesCS1A02G321900
ATAC	1A:512666100-512666547	ATAC.K2	3.22541	1.8384	1.84782	0.843524	genic	TraesCS1A02G322000
ATAC	1A:512874132-512874437	ATAC.K4	0.341632	0.216282	1.29984	2.21272	genic	TraesCS1A02G322200
ATAC	1A:512946721-512947354	ATAC.K2	3.09479	0.892164	1.86056	0.586799	promoter	TraesCS1A02G322500
ATAC	1A:512947797-512948187	ATAC.K2	3.47661	1.67619	3.28784	2.06602	promoter	TraesCS1A02G322500
ATAC	1A:513158349-513158553	ATAC.K2	0.944512	0.729952	0.573461	0.427874	genic	TraesCS1A02G322600
ATAC	1A:513159632-513159890	ATAC.K3	1.94931	2.298	1.77136	1.0269	promoter	TraesCS1A02G322600
ATAC	1A:5131881-5132173	ATAC.K2	1.54739	1.149	0.790102	0.427874	promoter	TraesCS1A02G008700
ATAC	1A:513636566-513636886	ATAC.K4	0.442112	0.865128	1.73313	1.83375	promoter	TraesCS1A02G322800
ATAC	1A:513659921-513660853	ATAC.K1	3.67757	20.4657	14.1071	10.3912	promoter	TraesCS1A02G323000
ATAC	1A:514549202-514549420	ATAC.K2	1.22586	0.621811	0.586205	0.855749	promoter	TraesCS1A02G323800
ATAC	1A:514550379-514550713	ATAC.K4	1.10528	0.892164	1.26161	2.43277	genic	TraesCS1A02G323800
ATAC	1A:514690808-514690937	ATAC.K2	1.04499	0.554223	0.203897	0.342299	genic	TraesCS1A02G324000
ATAC	1A:514691865-514692481	ATAC.K1	0.422016	1.73026	2.88005	2.1027	genic	TraesCS1A02G324000
ATAC	1A:515552593-515552727	ATAC.K1	0.010048	0.135176	0.35682	0.1467	genic	TraesCS1A02G324800
ATAC	1A:515555165-515555376	ATAC.K4	0.160768	0.162212	0.254872	0.623474	genic	TraesCS1A02G324800
ATAC	1A:515650575-515650946	ATAC.K4	0.180864	0.189247	1.44002	1.8093	promoter	TraesCS1A02G325000
ATAC	1A:516041312-516041857	ATAC.K4	0.783744	0.297388	2.08995	4.64549	promoter	TraesCS1A02G325100
ATAC	1A:516064553-516064704	ATAC.K4	0.020096	0.0135176	0.229384	0.440099	promoter	TraesCS1A02G325200
ATAC	1A:516373068-516373362	ATAC.K1	0.542592	1.16252	1.46551	1.18582	genic	TraesCS1A02G325400
ATAC	1A:516374727-516375085	ATAC.K2	2.21056	1.59508	1.38905	0.916873	promoter	TraesCS1A02G325500
ATAC	1A:516453846-516453932	ATAC.K2	0.381824	0.162212	0.0764615	0.0488999	promoter	TraesCS1A02G325700
ATAC	1A:516580754-516581349	ATAC.K1	1.20576	2.32503	2.85456	2.62837	promoter	TraesCS1A02G326000
ATAC	1A:516584264-516584511	ATAC.K4	0.562688	0.243317	0.981256	1.94377	promoter	TraesCS1A02G326100
ATAC	1A:516690377-516690822	ATAC.K4	1.04499	1.32473	2.29384	2.67727	promoter	TraesCS1A02G326400
ATAC	1A:516740134-516741139	ATAC.K4	1.26605	0.567741	5.09743	12.3595	promoter	TraesCS1A02G326800
ATAC	1A:516780943-516781205	ATAC.K1	0.140672	0.838093	0.790102	0.843524	genic	TraesCS1A02G327100
ATAC	1A:51697286-51697942	ATAC.K2	5.74746	3.35237	2.15366	3.20294	promoter	TraesCS1A02G069300
ATAC	1A:51701722-51701868	ATAC.K4	0.040192	0.216282	0.433282	0.757949	genic	TraesCS1A02G069300
ATAC	1A:517075041-517075391	ATAC.K4	0.281344	0.51367	2.56146	2.7384	genic	TraesCS1A02G327400
ATAC	1A:517094527-517095017	ATAC.K2	4.75271	1.70322	1.24887	2.23717	promoter	TraesCS1A02G327600
ATAC	1A:517095158-517095234	ATAC.K2	0.693312	0.51367	0.229384	0.378974	promoter	TraesCS1A02G327600
ATAC	1A:517376664-517377515	ATAC.K1	8.581	27.1704	19.829	13.4108	promoter	TraesCS1A02G328000
ATAC	1A:517381117-517381233	ATAC.K3	0.241152	3.19016	2.06446	0.782399	genic	TraesCS1A02G328000
ATAC	1A:517381433-517381802	ATAC.K1	0.743552	8.31334	5.64541	2.43277	genic	TraesCS1A02G328000
ATAC	1A:517381822-517383144	ATAC.K1	4.5417	37.1465	24.7353	12.1761	genic	TraesCS1A02G328000
ATAC	1A:517396681-517396826	ATAC.K4	0.361728	0.392011	0.968512	1.58925	promoter	TraesCS1A02G328100
ATAC	1A:517396994-517397224	ATAC.K2	1.38662	0.662364	0.930281	0.709049	promoter	TraesCS1A02G328100
ATAC	1A:517405942-517406149	ATAC.K1	0.643072	1.70322	1.988	1.63815	promoter	TraesCS1A02G328200
ATAC	1A:517509193-517509297	ATAC.K1	0.422016	1.16252	1.10869	0.819074	promoter	TraesCS1A02G328700
ATAC	1A:517518729-517519256	ATAC.K2	3.81824	0.756987	1.64392	2.7384	promoter	TraesCS1A02G328800
ATAC	1A:517519552-517519728	ATAC.K2	1.0249	0.324423	0.382307	0.317849	promoter	TraesCS1A02G328800
ATAC	1A:518044626-518044798	ATAC.K4	0.160768	0.148694	1.03223	0.794624	promoter	TraesCS1A02G329300
ATAC	1A:518044906-518045011	ATAC.K4	0.120576	0.432564	1.12143	1.08802	promoter	TraesCS1A02G329300
ATAC	1A:51822-51898	ATAC.K2	0.160768	0.0811058	0.0127436	0.02445	genic	TraesCS1A02G000100
ATAC	1A:518469539-518469665	ATAC.K2	0.5024	0.162212	0.165667	0.0733499	promoter	TraesCS1A02G329500
ATAC	1A:518472480-518472548	ATAC.K2	0.442112	0.108141	0.165667	0.0977998	promoter	TraesCS1A02G329500
ATAC	1A:518474094-518474298	ATAC.K2	1.96941	0.446082	0.624435	0.440099	genic	TraesCS1A02G329500
ATAC	1A:519259816-519260487	ATAC.K2	3.49671	2.18986	2.24287	1.88265	genic	TraesCS1A02G330500
ATAC	1A:519620367-519620829	ATAC.K1	0.70336	2.35207	2.39579	2.12715	promoter	TraesCS1A02G330700
ATAC	1A:519848482-519849013	ATAC.K1	1.64787	3.10906	4.3583	4.47434	promoter	TraesCS1A02G330800
ATAC	1A:519873212-519873694	ATAC.K4	1.0249	2.27096	5.53071	6.40589	genic	TraesCS1A02G330900
ATAC	1A:519892952-519893170	ATAC.K2	0.482304	0.2298	0.114692	0.342299	promoter	TraesCS1A02G331000
ATAC	1A:520353903-520354011	ATAC.K2	1.0249	0.51367	0.420538	0.501224	genic	TraesCS1A02G331300
ATAC	1A:520354724-520354829	ATAC.K2	1.14547	0.486635	0.203897	0.207825	genic	TraesCS1A02G331300
ATAC	1A:520355055-520355556	ATAC.K2	4.40103	1.94654	1.96251	2.3961	promoter	TraesCS1A02G331300
ATAC	1A:520356236-520356319	ATAC.K2	0.643072	0.459599	0.101949	0.1467	promoter	TraesCS1A02G331300
ATAC	1A:520400422-520400961	ATAC.K2	2.39143	1.02734	0.433282	0.635699	promoter	TraesCS1A02G331500
ATAC	1A:520417204-520417270	ATAC.K3	0.663168	0.784023	0.254872	0.354524	promoter	TraesCS1A02G331700
ATAC	1A:520567922-520568471	ATAC.K3	2.37133	8.05651	3.67015	3.05624	promoter	TraesCS1A02G331800
ATAC	1A:520568661-520568780	ATAC.K1	0.20096	1.35176	0.85382	0.513449	promoter	TraesCS1A02G331800
ATAC	1A:520569391-520570187	ATAC.K4	7.27476	7.63746	16.9999	13.093	promoter	TraesCS1A02G331800
ATAC	1A:520763749-520764356	ATAC.K4	2.27085	1.94654	5.2631	7.09049	genic	TraesCS1A02G332000
ATAC	1A:520812173-520812383	ATAC.K3	0.944512	2.18986	1.38905	0.745724	genic	TraesCS1A02G332400
ATAC	1A:520820935-520821249	ATAC.K4	0.80384	1.29769	3.05846	4.66994	genic	TraesCS1A02G332500
ATAC	1A:520937843-520938372	ATAC.K4	2.57229	1.86543	2.24287	4.46212	promoter	TraesCS1A02G332600
ATAC	1A:521253371-521253446	ATAC.K2	0.643072	0.270353	0.35682	0.17115	promoter	TraesCS1A02G332800
ATAC	1A:521255644-521256760	ATAC.K2	10.2691	1.9195	1.23613	0.929098	promoter	TraesCS1A02G332800
ATAC	1A:521266980-521267128	ATAC.K1	0.422016	0.756987	1.22338	0.977998	promoter	TraesCS1A02G332900
ATAC	1A:521320234-521320704	ATAC.K1	2.49191	6.40736	6.69038	7.32276	promoter	TraesCS1A02G333400
ATAC	1A:521330141-521330679	ATAC.K1	2.15027	9.69214	10.6154	8.30076	genic	TraesCS1A02G333500
ATAC	1A:521330962-521331908	ATAC.K1	7.37524	22.615	23.0786	20.0612	promoter	TraesCS1A02G333600
ATAC	1A:521332579-521332690	ATAC.K2	1.0249	0.919199	0.165667	0.366749	genic	TraesCS1A02G333500
ATAC	1A:521334141-521334392	ATAC.K1	0.763648	3.46051	2.43402	2.42055	promoter	TraesCS1A02G333500
ATAC	1A:521340421-521340972	ATAC.K3	4.13978	9.96249	5.41602	5.47679	promoter	TraesCS1A02G333700
ATAC	1A:521629636-521629717	ATAC.K2	0.30144	0.0540705	0.127436	0.0366749	genic	TraesCS1A02G333800
ATAC	1A:521738461-521738786	ATAC.K2	1.88903	1.48694	0.777358	0.892423	promoter	TraesCS1A02G334100
ATAC	1A:521843019-521843133	ATAC.K2	0.321536	0.135176	0.0382307	0.0733499	promoter	TraesCS1A02G334200
ATAC	1A:521843607-521843742	ATAC.K2	0.361728	0.135176	0.0509743	0.02445	promoter	TraesCS1A02G334200
ATAC	1A:521876840-521877296	ATAC.K2	4.5216	0.97327	0.598948	0.488999	genic	TraesCS1A02G334400
ATAC	1A:521878465-521878960	ATAC.K2	2.75315	1.32473	0.522487	1.08802	promoter	TraesCS1A02G334400
ATAC	1A:521906953-521907186	ATAC.K2	0.582784	0.405529	0.203897	0.1467	promoter	TraesCS1A02G334500
ATAC	1A:521977183-521977659	ATAC.K2	1.54739	0.405529	0.280359	0.22005	promoter	TraesCS1A02G334700
ATAC	1A:522189261-522189709	ATAC.K2	7.37524	4.24454	1.0832	0.831299	promoter	TraesCS1A02G334800
ATAC	1A:522190975-522191147	ATAC.K2	1.14547	0.351458	0.216641	0.158925	genic	TraesCS1A02G334800
ATAC	1A:522234458-522234564	ATAC.K2	0.683264	0.432564	0.242128	0.12225	genic	TraesCS1A02G334900
ATAC	1A:522234722-522235183	ATAC.K3	3.33594	3.64976	1.01949	1.2714	genic	TraesCS1A02G334900
ATAC	1A:522242957-522243164	ATAC.K2	0.361728	0.270353	0.0382307	0.0488999	promoter	TraesCS1A02G335100
ATAC	1A:52229398-52229495	ATAC.K3	0.361728	1.29769	0.547974	0.330074	genic	TraesCS1A02G069500
ATAC	1A:52235521-52235979	ATAC.K4	1.78854	2.47373	5.03371	4.65772	genic	TraesCS1A02G069600
ATAC	1A:52239211-52239365	ATAC.K2	2.04979	1.08141	1.63118	0.770174	promoter	TraesCS1A02G069600
ATAC	1A:522504096-522504445	ATAC.K4	0.160768	0.0811058	1.73313	2.7873	promoter	TraesCS1A02G335300
ATAC	1A:522518748-522519086	ATAC.K2	1.98951	0.351458	0.127436	0.110025	promoter	TraesCS1A02G335600
ATAC	1A:522972409-522972675	ATAC.K2	0.643072	0.351458	0.216641	0.0977998	promoter	TraesCS1A02G336200
ATAC	1A:522983926-522984025	ATAC.K2	0.160768	0.0135176	0.0127436	0.0366749	promoter	TraesCS1A02G336300
ATAC	1A:524122977-524123383	ATAC.K3	2.15027	2.08172	0.790102	0.709049	promoter	TraesCS1A02G336400
ATAC	1A:524286179-524286281	ATAC.K4	0.140672	0.216282	0.471512	0.745724	promoter	TraesCS1A02G336500
ATAC	1A:524409582-524409660	ATAC.K2	0.261248	0.162212	0.0127436	0.0488999	promoter	TraesCS1A02G336600
ATAC	1A:52453738-52454044	ATAC.K1	2.19047	4.65007	4.49848	3.96089	promoter	TraesCS1A02G069700
ATAC	1A:524700593-524700795	ATAC.K2	0.341632	0.216282	0.254872	0.0611249	promoter	TraesCS1A02G336700
ATAC	1A:52563941-52564173	ATAC.K1	0.080384	0.392011	0.369564	0.403424	promoter	TraesCS1A02G070100
ATAC	1A:526738225-526738339	ATAC.K4	0.241152	0.405529	1.17241	0.941323	promoter	TraesCS1A02G337200
ATAC	1A:526738612-526738952	ATAC.K4	0.381824	0.702917	2.10269	2.81175	promoter	TraesCS1A02G337200
ATAC	1A:526758987-526759114	ATAC.K4	0.020096	0.0540705	0.17841	0.26895	genic	TraesCS1A02G337400
ATAC	1A:526920911-526921079	ATAC.K2	1.24595	0.865128	0.53523	0.806849	promoter	TraesCS1A02G337600
ATAC	1A:526921976-526922117	ATAC.K3	0.542592	0.648846	0.101949	0.110025	promoter	TraesCS1A02G337600
ATAC	1A:527173691-527173807	ATAC.K2	0.5024	0.162212	0.0764615	0.134475	promoter	TraesCS1A02G337800
ATAC	1A:527174383-527174638	ATAC.K2	4.82304	4.08232	3.95051	2.5917	promoter	TraesCS1A02G337800
ATAC	1A:527178993-527179761	ATAC.K2	10.4901	3.86604	3.78484	2.28607	promoter	TraesCS1A02G337900
ATAC	1A:527891203-527891830	ATAC.K3	2.95411	3.59569	1.24887	2.12715	promoter	TraesCS1A02G338100
ATAC	1A:527962978-527963364	ATAC.K1	1.82874	3.35237	4.24361	3.75307	promoter	TraesCS1A02G338300
ATAC	1A:528063181-528063337	ATAC.K1	1.18566	2.40614	2.79084	3.44744	promoter	TraesCS1A02G338500
ATAC	1A:528063643-528063766	ATAC.K1	0.542592	1.0003	1.27436	0.977998	promoter	TraesCS1A02G338500
ATAC	1A:528932417-528932549	ATAC.K2	0.361728	0.0540705	0.152923	0.02445	promoter	TraesCS1A02G339000
ATAC	1A:529126823-529126978	ATAC.K2	0.783744	0.135176	0.127436	0.12225	promoter	TraesCS1A02G339100
ATAC	1A:529243189-529244303	ATAC.K4	4.98381	4.81228	16.1589	15.1834	promoter	TraesCS1A02G339200
ATAC	1A:529248497-529248662	ATAC.K2	1.18566	0.364976	0.369564	0.305624	genic	TraesCS1A02G339300
ATAC	1A:529248886-529249121	ATAC.K2	2.15027	0.486635	0.67541	0.427874	genic	TraesCS1A02G339300
ATAC	1A:529250590-529250846	ATAC.K3	3.33594	3.97418	2.51048	1.63815	promoter	TraesCS1A02G339300
ATAC	1A:529663080-529663287	ATAC.K2	1.34643	0.540705	0.254872	0.354524	promoter	TraesCS1A02G339400
ATAC	1A:529663639-529663815	ATAC.K2	0.643072	0.51367	0.203897	0.22005	promoter	TraesCS1A02G339400
ATAC	1A:530178237-530178630	ATAC.K4	3.5168	1.73026	3.35156	5.84354	promoter	TraesCS1A02G339700
ATAC	1A:53023353-53024421	ATAC.K3	17.8654	23.9803	7.91376	8.05626	genic	TraesCS1A02G070200
ATAC	1A:530236995-530237575	ATAC.K1	2.5321	5.92072	5.21212	5.41567	promoter	TraesCS1A02G340000
ATAC	1A:53025096-53025339	ATAC.K2	3.27565	1.31121	0.458769	0.464549	genic	TraesCS1A02G070200
ATAC	1A:530257222-530257379	ATAC.K2	1.46701	1.40583	0.71364	0.977998	genic	TraesCS1A02G340100
ATAC	1A:53026100-53026189	ATAC.K2	1.40672	0.162212	0.127436	0.1467	genic	TraesCS1A02G070200
ATAC	1A:53026264-53026393	ATAC.K2	2.27085	1.02734	0.446025	0.501224	genic	TraesCS1A02G070200
ATAC	1A:530522827-530523125	ATAC.K4	0.522496	0.729952	1.74587	2.79952	genic	TraesCS1A02G340300
ATAC	1A:530523950-530524319	ATAC.K4	1.06509	0.878646	2.30659	2.55502	promoter	TraesCS1A02G340300
ATAC	1A:530524585-530524690	ATAC.K2	0.562688	0.432564	0.191154	0.02445	promoter	TraesCS1A02G340300
ATAC	1A:530593898-530594143	ATAC.K1	0.221056	0.351458	0.71364	0.464549	genic	TraesCS1A02G340400
ATAC	1A:530726029-530726353	ATAC.K4	0.723456	1.32473	1.64392	1.94377	promoter	TraesCS1A02G340500
ATAC	1A:530737167-530737357	ATAC.K2	0.844032	0.297388	0.382307	0.330074	promoter	TraesCS1A02G340700
ATAC	1A:530779440-530779558	ATAC.K2	1.64787	0.770505	0.586205	0.22005	promoter	TraesCS1A02G340900
ATAC	1A:530807460-530807541	ATAC.K3	0.60288	0.811058	0.35682	0.158925	promoter	TraesCS1A02G341000
ATAC	1A:530809069-530809139	ATAC.K2	0.80384	0.297388	0.152923	0.26895	promoter	TraesCS1A02G341000
ATAC	1A:531047203-531047374	ATAC.K2	1.12538	0.486635	0.242128	0.574574	promoter	TraesCS1A02G341400
ATAC	1A:531059819-531060058	ATAC.K2	0.723456	0.648846	0.280359	0.281175	promoter	TraesCS1A02G341500
ATAC	1A:531237965-531238571	ATAC.K2	7.63648	4.74469	2.56146	4.16872	promoter	TraesCS1A02G341800
ATAC	1A:531238703-531239155	ATAC.K2	4.50151	2.85222	2.03897	3.70417	promoter	TraesCS1A02G341800
ATAC	1A:531240388-531241391	ATAC.K2	13.6954	4.14991	2.86731	5.89244	genic	TraesCS1A02G341800
ATAC	1A:531282149-531282572	ATAC.K4	0.522496	0.270353	4.02697	3.55747	genic	TraesCS1A02G341900
ATAC	1A:531366060-531366268	ATAC.K2	0.864128	0.405529	0.484256	0.378974	promoter	TraesCS1A02G342000
ATAC	1A:531367458-531367551	ATAC.K2	0.321536	0.0135176	0.0254872	0.02445	genic	TraesCS1A02G342000
ATAC	1A:531608248-531608710	ATAC.K2	7.51591	3.10906	2.00074	2.0538	genic	TraesCS1A02G342500
ATAC	1A:531608790-531609014	ATAC.K2	2.31104	1.02734	0.586205	0.464549	genic	TraesCS1A02G342500
ATAC	1A:531611086-531611178	ATAC.K2	1.66797	0.446082	0.395051	0.378974	genic	TraesCS1A02G342500
ATAC	1A:531614197-531614330	ATAC.K3	1.70816	2.16282	1.31259	0.513449	promoter	TraesCS1A02G342600
ATAC	1A:531615222-531615654	ATAC.K2	18.217	11.5305	6.86879	3.99757	promoter	TraesCS1A02G342600
ATAC	1A:531641635-531641732	ATAC.K2	0.472256	0.378494	0.165667	0.110025	promoter	TraesCS1A02G342700
ATAC	1A:531641940-531642346	ATAC.K2	2.41152	1.59508	1.04497	1.03912	promoter	TraesCS1A02G342700
ATAC	1A:531644667-531645187	ATAC.K3	1.98951	2.35207	0.917538	0.721274	promoter	TraesCS1A02G342800
ATAC	1A:531645366-531645509	ATAC.K2	1.0048	0.567741	0.191154	0.26895	promoter	TraesCS1A02G342800
ATAC	1A:531686629-531686839	ATAC.K4	0.060288	0.108141	1.01949	0.770174	genic	TraesCS1A02G342900
ATAC	1A:531714723-531715054	ATAC.K3	2.45171	2.51428	1.22338	0.953548	promoter	TraesCS1A02G343000
ATAC	1A:531717787-531718121	ATAC.K4	0.160768	0.270353	1.18515	1.5648	genic	TraesCS1A02G343000
ATAC	1A:531863542-531863756	ATAC.K4	0.622976	0.162212	1.03223	1.1247	promoter	TraesCS1A02G343200
ATAC	1A:531864303-531864424	ATAC.K4	0.221056	0.0540705	1.42728	1.0758	promoter	TraesCS1A02G343200
ATAC	1A:531864664-531865044	ATAC.K4	1.72826	0.324423	7.20012	5.64794	promoter	TraesCS1A02G343200
ATAC	1A:531865310-531865662	ATAC.K4	0.763648	0.297388	2.31933	1.68705	promoter	TraesCS1A02G343200
ATAC	1A:53186810-53187830	ATAC.K2	10.8117	3.78494	6.26984	5.55014	genic	TraesCS1A02G070400
ATAC	1A:531881251-531881898	ATAC.K2	12.3992	9.8138	6.70312	4.91444	promoter	TraesCS1A02G343300
ATAC	1A:531987890-531988025	ATAC.K1	0.442112	0.919199	0.993999	1.13692	promoter	TraesCS1A02G343400
ATAC	1A:532101336-532101647	ATAC.K1	1.56749	2.51428	3.41528	2.98289	promoter	TraesCS1A02G343800
ATAC	1A:532253494-532253585	ATAC.K2	0.60288	0.243317	0.318589	0.1467	genic	TraesCS1A02G344000
ATAC	1A:532253609-532253796	ATAC.K2	1.07514	0.986787	0.318589	0.452324	genic	TraesCS1A02G344000
ATAC	1A:532265642-532266180	ATAC.K4	1.0249	0.297388	1.55472	1.94377	promoter	TraesCS1A02G344100
ATAC	1A:532378959-532379265	ATAC.K2	0.683264	0.108141	0.17841	0.1956	promoter	TraesCS1A02G344300
ATAC	1A:532384459-532384800	ATAC.K2	0.643072	0.189247	0.0764615	0.22005	genic	TraesCS1A02G344300
ATAC	1A:532439864-532440134	ATAC.K2	0.643072	0.297388	0.17841	0.158925	genic	TraesCS1A02G344400
ATAC	1A:532509697-532510313	ATAC.K2	2.21056	1.94654	1.35082	0.977998	promoter	TraesCS1A02G344700
ATAC	1A:532511599-532511716	ATAC.K2	0.422016	0.135176	0.101949	0.0733499	promoter	TraesCS1A02G344800
ATAC	1A:532512006-532512086	ATAC.K2	0.281344	0.0270353	0.0509743	0.02445	promoter	TraesCS1A02G344800
ATAC	1A:532512214-532512334	ATAC.K2	0.833984	0.378494	0.140179	0.0733499	promoter	TraesCS1A02G344800
ATAC	1A:532617821-532618157	ATAC.K2	1.38662	1.16252	0.0637179	0.0488999	genic	TraesCS1A02G345000
ATAC	1A:532618445-532618736	ATAC.K2	0.884224	0.162212	0.101949	0.134475	promoter	TraesCS1A02G345000
ATAC	1A:532619674-532620039	ATAC.K4	1.08518	1.13548	2.86731	3.43522	promoter	TraesCS1A02G345000
ATAC	1A:532627094-532627394	ATAC.K2	0.823936	0.0540705	0.0764615	0.0733499	genic	TraesCS1A02G345100
ATAC	1A:532745320-532745447	ATAC.K2	0.361728	0.162212	0.203897	0.0733499	genic	TraesCS1A02G345400
ATAC	1A:532746136-532746617	ATAC.K4	0.482304	0.351458	1.04497	1.9071	promoter	TraesCS1A02G345400
ATAC	1A:532752259-532752518	ATAC.K2	0.361728	0.0811058	0.0127436	0.0488999	genic	TraesCS1A02G345500
ATAC	1A:532759249-532759366	ATAC.K2	0.361728	0.0811058	0.0764615	0.0366749	promoter	TraesCS1A02G345500
ATAC	1A:532766764-532766982	ATAC.K2	1.26605	0.297388	0.229384	0.599024	genic	TraesCS1A02G345600
ATAC	1A:532776809-532777113	ATAC.K4	1.38662	1.81136	2.63792	3.11737	promoter	TraesCS1A02G345800
ATAC	1A:532782320-532782768	ATAC.K4	1.60768	1.05438	5.40328	4.18094	promoter	TraesCS1A02G345900
ATAC	1A:532811868-532811958	ATAC.K2	0.160768	0.0135176	0.0127436	0.0733499	promoter	TraesCS1A02G346100
ATAC	1A:532916571-532916859	ATAC.K4	0.10048	0.108141	0.764615	1.7115	promoter	TraesCS1A02G346300
ATAC	1A:532917251-532917360	ATAC.K2	0.381824	0.108141	0.0637179	0.207825	genic	TraesCS1A02G346300
ATAC	1A:532917715-532918017	ATAC.K4	0.884224	0.784023	1.42728	1.93155	genic	TraesCS1A02G346300
ATAC	1A:532921363-532921476	ATAC.K2	0.462208	0.378494	0.0509743	0.0977998	genic	TraesCS1A02G346300
ATAC	1A:532967044-532967908	ATAC.K1	1.58758	5.00152	7.00897	6.83376	genic	TraesCS1A02G346500
ATAC	1A:532968255-532968551	ATAC.K3	1.90912	8.27279	4.15441	1.63815	promoter	TraesCS1A02G346500
ATAC	1A:532969638-532970040	ATAC.K2	6.31015	3.89308	2.67615	1.24695	promoter	TraesCS1A02G346500
ATAC	1A:533137171-533137290	ATAC.K2	2.21056	0.756987	0.35682	0.12225	promoter	TraesCS1A02G346600
ATAC	1A:533139779-533139861	ATAC.K2	0.683264	0.297388	0.254872	0.354524	promoter	TraesCS1A02G346600
ATAC	1A:533160493-533160789	ATAC.K4	1.86893	1.8384	3.12218	4.10759	promoter	TraesCS1A02G346900
ATAC	1A:533162347-533162419	ATAC.K2	0.924416	0.351458	0.739128	0.403424	promoter	TraesCS1A02G346900
ATAC	1A:533322655-533322777	ATAC.K4	0.10048	0.162212	0.446025	0.599024	promoter	TraesCS1A02G347400
ATAC	1A:533462049-533462585	ATAC.K4	2.39143	2.94684	5.37779	4.05869	promoter	TraesCS1A02G347800
ATAC	1A:533667002-533667305	ATAC.K1	0.060288	0.0811058	0.85382	0.22005	genic	TraesCS1A02G348100
ATAC	1A:533688653-533688757	ATAC.K4	0.020096	0.135176	0.0382307	0.293399	genic	TraesCS1A02G348200
ATAC	1A:533740805-533740921	ATAC.K2	0.542592	0.189247	0.127436	0.0733499	genic	TraesCS1A02G348600
ATAC	1A:534050290-534050505	ATAC.K2	1.70816	1.10845	1.988	0.929098	genic	TraesCS1A02G348800
ATAC	1A:534248158-534248534	ATAC.K4	0.783744	3.79845	3.69564	6.65039	promoter	TraesCS1A02G348900
ATAC	1A:534267605-534268168	ATAC.K1	1.80864	3.46051	4.86805	4.52324	promoter	TraesCS1A02G349200
ATAC	1A:534932633-534932782	ATAC.K4	0.060288	0.0811058	0.726384	0.611249	genic	TraesCS1A02G349900
ATAC	1A:534935748-534936062	ATAC.K2	5.78765	3.7579	1.491	1.18582	promoter	TraesCS1A02G349900
ATAC	1A:534942957-534943262	ATAC.K2	1.88903	0.459599	0.497	0.317849	promoter	TraesCS1A02G350000
ATAC	1A:534943713-534943805	ATAC.K2	0.522496	0.189247	0.254872	0.02445	promoter	TraesCS1A02G350000
ATAC	1A:534945324-534945860	ATAC.K4	0.743552	1.13548	7.32756	7.21274	promoter	TraesCS1A02G350000
ATAC	1A:535063520-535063615	ATAC.K2	1.30624	1.06789	0.67541	0.953548	genic	TraesCS1A02G350200
ATAC	1A:535310517-535310629	ATAC.K3	1.39667	1.48694	0.700897	0.403424	promoter	TraesCS1A02G350400
ATAC	1A:535311363-535311678	ATAC.K3	7.01351	9.59752	4.0652	2.2983	promoter	TraesCS1A02G350400
ATAC	1A:535313353-535314782	ATAC.K1	9.16378	16.7483	24.4422	21.3815	genic	TraesCS1A02G350400
ATAC	1A:535323539-535324271	ATAC.K3	18.2673	26.0755	10.4497	8.91201	genic	TraesCS1A02G350600
ATAC	1A:535434688-535435171	ATAC.K3	5.26515	9.86787	6.0532	3.45967	genic	TraesCS1A02G350800
ATAC	1A:535444955-535445040	ATAC.K2	1.44691	0.486635	0.203897	0.415649	promoter	TraesCS1A02G350900
ATAC	1A:535445132-535445258	ATAC.K2	1.42682	0.392011	0.382307	0.305624	promoter	TraesCS1A02G350900
ATAC	1A:535446090-535446461	ATAC.K3	11.093	10.7195	8.3343	5.86799	promoter	TraesCS1A02G351000
ATAC	1A:535770488-535771021	ATAC.K4	1.08518	1.13548	2.15366	3.54524	promoter	TraesCS1A02G351200
ATAC	1A:535854695-535854896	ATAC.K2	2.87373	1.27066	0.407795	0.880198	promoter	TraesCS1A02G351300
ATAC	1A:535886907-535887072	ATAC.K2	0.783744	0.378494	0.229384	0.293399	promoter	TraesCS1A02G351500
ATAC	1A:536245443-536245555	ATAC.K4	0.010048	0.0270353	0.0509743	0.17115	promoter	TraesCS1A02G351700
ATAC	1A:536348602-536348727	ATAC.K4	0.060288	0.216282	0.140179	0.427874	genic	TraesCS1A02G351800
ATAC	1A:536357198-536357363	ATAC.K2	3.69767	2.51428	0.815589	0.770174	promoter	TraesCS1A02G351900
ATAC	1A:536357769-536358118	ATAC.K2	5.87808	5.19077	1.988	1.82152	promoter	TraesCS1A02G351900
ATAC	1A:536358204-536358552	ATAC.K4	1.90912	1.40583	3.89953	5.44012	promoter	TraesCS1A02G351900
ATAC	1A:536433992-536434869	ATAC.K2	10.0681	6.77233	5.74735	5.41567	genic	TraesCS1A02G352000
ATAC	1A:536617648-536617975	ATAC.K2	1.74835	0.351458	0.446025	0.537899	promoter	TraesCS1A02G352200
ATAC	1A:536633192-536633575	ATAC.K4	4.17997	3.64976	8.84404	11.8093	promoter	TraesCS1A02G352500
ATAC	1A:536634869-536635097	ATAC.K2	2.04979	0.946234	0.89205	0.770174	promoter	TraesCS1A02G352500
ATAC	1A:536635864-536636029	ATAC.K2	1.44691	0.811058	0.751871	1.10025	promoter	TraesCS1A02G352500
ATAC	1A:536667089-536667341	ATAC.K1	0.964609	1.78433	2.49774	1.82152	promoter	TraesCS1A02G352800
ATAC	1A:536811707-536811977	ATAC.K3	0.422016	0.459599	0.17841	0.0855749	promoter	TraesCS1A02G352900
ATAC	1A:536886921-536887032	ATAC.K4	0.120576	0.121659	0.522487	0.207825	promoter	TraesCS1A02G353000
ATAC	1A:536968424-536968631	ATAC.K2	1.98951	0.892164	0.790102	1.14915	promoter	TraesCS1A02G353300
ATAC	1A:536975031-536975406	ATAC.K2	0.823936	0.378494	0.382307	0.354524	genic	TraesCS1A02G353400
ATAC	1A:537067628-537067865	ATAC.K4	0.5024	0.432564	0.586205	1.24695	promoter	TraesCS1A02G353700
ATAC	1A:537081584-537081889	ATAC.K1	0.060288	0.405529	0.509743	0.427874	promoter	TraesCS1A02G354000
ATAC	1A:537347843-537348059	ATAC.K2	4.56179	2.91981	2.39579	2.5428	promoter	TraesCS1A02G354300
ATAC	1A:537529106-537529211	ATAC.K2	0.361728	0.270353	0.0509743	0.0733499	promoter	TraesCS1A02G354500
ATAC	1A:537541931-537542167	ATAC.K1	1.29619	3.35237	3.68289	3.59414	promoter	TraesCS1A02G354600
ATAC	1A:537831621-537831867	ATAC.K1	1.24595	2.56835	2.54872	2.94622	promoter	TraesCS1A02G355100
ATAC	1A:537968750-537969026	ATAC.K3	1.20576	1.18955	0.637179	0.366749	promoter	TraesCS1A02G355400
ATAC	1A:537970244-537970347	ATAC.K2	0.844032	0.162212	0.369564	0.26895	promoter	TraesCS1A02G355400
ATAC	1A:537973879-537974018	ATAC.K3	1.88903	2.0682	1.50374	0.745724	genic	TraesCS1A02G355500
ATAC	1A:537977855-537978478	ATAC.K2	18.5486	14.599	11.7241	7.68951	promoter	TraesCS1A02G355500
ATAC	1A:537980686-537980760	ATAC.K3	1.18566	1.20307	0.382307	0.623474	promoter	TraesCS1A02G355500
ATAC	1A:538783649-538784596	ATAC.K4	0.361728	0.243317	22.5561	20.0367	promoter	TraesCS1A02G355700
ATAC	1A:538784696-538784932	ATAC.K4	0.120576	0.189247	2.54872	2.33497	promoter	TraesCS1A02G355700
ATAC	1A:539279798-539280259	ATAC.K4	0.663168	0.270353	0.968512	1.6626	promoter	TraesCS1A02G355900
ATAC	1A:539316609-539317863	ATAC.K4	1.94931	2.08172	25.6401	23.3864	promoter	TraesCS1A02G356000
ATAC	1A:539428216-539428599	ATAC.K4	0.924416	1.56805	3.12218	4.57214	promoter	TraesCS1A02G356300
ATAC	1A:539703633-539704039	ATAC.K4	0.864128	1.18955	1.44002	2.13937	promoter	TraesCS1A02G356500
ATAC	1A:539752009-539752110	ATAC.K2	0.482304	0.108141	0.0254872	0.0488999	promoter	TraesCS1A02G356800
[truncated: 101,659 more rows]

## Sheet: Table S5
Table S5. Over-representation analysis for each RNA Cluster in open chromatin and histone modification cluster.
RNA.cluster	Cluster	GeneRatio	BgRatio	pvalue	p.adjust	qvalue	Count	RNA.cluster.GeneNum	Percentage
C1	ATAC.K1	925/6709	12963/50072	1	1	0.526316	925	10604	0.0872312
C1	ATAC.K2	4241/6709	20102/50072	0	0	0	4241	10604	0.399943
C1	ATAC.K3	1467/6709	8485/50072	2.0306e-29	4.0612e-29	2.13748e-29	1467	10604	0.138344
C1	ATAC.K4	1740/6709	18758/50072	1	1	0.526316	1740	10604	0.164089
C2	ATAC.K1	803/1756	12963/50072	1.59658e-74	6.3863e-74	3.36121e-74	803	2941	0.273036
C2	ATAC.K2	329/1756	20102/50072	1	1	0.526316	329	2941	0.111867
C2	ATAC.K3	289/1756	8485/50072	0.719925	0.9599	0.505211	289	2941	0.0982659
C2	ATAC.K4	713/1756	18758/50072	0.00314798	0.00629596	0.00331366	713	2941	0.242435
C3	ATAC.K1	1071/4018	12963/50072	0.127801	0.255602	0.201791	1071	6277	0.170623
C3	ATAC.K2	762/4018	20102/50072	1	1	0.789474	762	6277	0.121396
C3	ATAC.K3	386/4018	8485/50072	1	1	0.789474	386	6277	0.0614943
C3	ATAC.K4	2750/4018	18758/50072	0	0	0	2750	6277	0.438107
C4	ATAC.K1	1040/4168	12963/50072	0.928302	1	0.789474	1040	6954	0.149554
C4	ATAC.K2	947/4168	20102/50072	1	1	0.789474	947	6954	0.136181
C4	ATAC.K3	384/4168	8485/50072	1	1	0.789474	384	6954	0.05522
C4	ATAC.K4	2724/4168	18758/50072	5.82008836735343e-318	2.32803534694137e-317	1.8379227203325e-317	2724	6954	0.391717
C5	ATAC.K1	1397/4593	12963/50072	2.5907e-13	5.18141e-13	2.72706e-13	1397	7444	0.187668
C5	ATAC.K2	1464/4593	20102/50072	1	1	0.526316	1464	7444	0.196668
C5	ATAC.K3	2188/4593	8485/50072	0	0	0	2188	7444	0.293928
C5	ATAC.K4	1034/4593	18758/50072	1	1	0.526316	1034	7444	0.138904
C6	ATAC.K1	1725/2924	12963/50072	0	0	0	1725	5926	0.29109
C6	ATAC.K2	436/2924	20102/50072	1	1	0.789474	436	5926	0.0735741
C6	ATAC.K3	522/2924	8485/50072	0.0937849	0.18757	0.148081	522	5926	0.0880864
C6	ATAC.K4	898/2924	18758/50072	1	1	0.789474	898	5926	0.151536
C1	H3K27me3.K1	92/589	1315/4793	1	1	0.789474	92	10604	0.00867597
C1	H3K27me3.K2	34/589	1398/4793	1	1	0.789474	34	10604	0.00320634
C1	H3K27me3.K3	89/589	1060/4793	0.999998	1	0.789474	89	10604	0.00839306
C1	H3K27me3.K4	382/589	1152/4793	7.88147e-115	3.15259e-114	2.48888e-114	382	10604	0.0360241
C2	H3K27me3.K1	42/191	1315/4793	0.966672	1	0.526316	42	2941	0.0142809
C2	H3K27me3.K2	84/191	1398/4793	6.41446e-06	2.56578e-05	1.35041e-05	84	2941	0.0285617
C2	H3K27me3.K3	60/191	1060/4793	0.00151324	0.00302648	0.00159289	60	2941	0.0204012
C2	H3K27me3.K4	13/191	1152/4793	1	1	0.526316	13	2941	0.00442027
C3	H3K27me3.K1	211/643	1315/4793	0.000702841	0.00140568	0.000739833	211	6277	0.0336148
C3	H3K27me3.K2	313/643	1398/4793	1.68619e-29	6.74475e-29	3.54987e-29	313	6277	0.0498646
C3	H3K27me3.K3	125/643	1060/4793	0.965984	1	0.526316	125	6277	0.019914
C3	H3K27me3.K4	25/643	1152/4793	1	1	0.526316	25	6277	0.00398279
C4	H3K27me3.K1	197/590	1315/4793	0.000390521	0.000781042	0.000411075	197	6954	0.028329
C4	H3K27me3.K2	293/590	1398/4793	2.27353e-29	9.09411e-29	4.78637e-29	293	6954	0.042134
C4	H3K27me3.K3	72/590	1060/4793	1	1	0.526316	72	6954	0.0103538
C4	H3K27me3.K4	61/590	1152/4793	1	1	0.526316	61	6954	0.00877193
C5	H3K27me3.K1	47/575	1315/4793	1	1	0.526316	47	7444	0.00631381
C5	H3K27me3.K2	58/575	1398/4793	1	1	0.526316	58	7444	0.00779151
C5	H3K27me3.K3	314/575	1060/4793	4.09051e-75	1.6362e-74	8.6116e-75	314	7444	0.0421816
C5	H3K27me3.K4	173/575	1152/4793	0.000234651	0.000469301	0.000247001	173	7444	0.0232402
C6	H3K27me3.K1	14/202	1315/4793	1	1	0.526316	14	5926	0.00236247
C6	H3K27me3.K2	76/202	1398/4793	0.00504683	0.0100937	0.00531246	76	5926	0.0128248
C6	H3K27me3.K3	112/202	1060/4793	5.37109e-26	2.14844e-25	1.13076e-25	112	5926	0.0188998
C6	H3K27me3.K4	9/202	1152/4793	1	1	0.526316	9	5926	0.00151873
C1	H3K27ac.K1	237/670	1380/4287	0.0310124	0.0620247	0.0326446	237	10604	0.0223501
C1	H3K27ac.K2	303/670	744/4287	1.73034e-78	6.92135e-78	3.64282e-78	303	10604	0.0285741
C1	H3K27ac.K3	53/670	1159/4287	1	1	0.526316	53	10604	0.00499811
C1	H3K27ac.K4	88/670	1122/4287	1	1	0.526316	88	10604	0.00829876
C2	H3K27ac.K1	57/276	1380/4287	0.999996	1	0.789474	57	2941	0.0193812
C2	H3K27ac.K2	8/276	744/4287	1	1	0.789474	8	2941	0.00272016
C2	H3K27ac.K3	78/276	1159/4287	0.340304	0.680607	0.537321	78	2941	0.0265216
C2	H3K27ac.K4	154/276	1122/4287	2.98802e-27	1.19521e-26	9.43587e-27	154	2941	0.0523631
C3	H3K27ac.K1	40/685	1380/4287	1	1	0.789474	40	6277	0.00637247
C3	H3K27ac.K2	11/685	744/4287	1	1	0.789474	11	6277	0.00175243
C3	H3K27ac.K3	457/685	1159/4287	8.36924e-128	3.3477e-127	2.64292e-127	457	6277	0.0728055
C3	H3K27ac.K4	191/685	1122/4287	0.143796	0.287592	0.227047	191	6277	0.0304285
C4	H3K27ac.K1	57/552	1380/4287	1	1	0.789474	57	6954	0.00819672
C4	H3K27ac.K2	12/552	744/4287	1	1	0.789474	12	6954	0.00172563
C4	H3K27ac.K3	368/552	1159/4287	1.57305e-98	6.29219e-98	4.96752e-98	368	6954	0.0529192
C4	H3K27ac.K4	129/552	1122/4287	0.95236	1	0.789474	129	6954	0.0185505
C5	H3K27ac.K1	542/703	1380/4287	4.90106e-161	1.96043e-160	1.5477e-160	542	7444	0.0728103
C5	H3K27ac.K2	56/703	744/4287	1	1	0.789474	56	7444	0.00752284
C5	H3K27ac.K3	15/703	1159/4287	1	1	0.789474	15	7444	0.00201505
C5	H3K27ac.K4	115/703	1122/4287	1	1	0.789474	115	7444	0.0154487
C6	H3K27ac.K1	166/416	1380/4287	0.000292799	0.000585598	0.000308209	166	5926	0.0280121
C6	H3K27ac.K2	5/416	744/4287	1	1	0.526316	5	5926	0.000843739
C6	H3K27ac.K3	44/416	1159/4287	1	1	0.526316	44	5926	0.00742491
C6	H3K27ac.K4	224/416	1122/4287	6.32624e-37	2.53049e-36	1.33184e-36	224	5926	0.0377995
C1	H3K4me3.K1	597/3709	1950/13281	0.00241288	0.00482576	0.00253988	597	10604	0.0562995
C1	H3K4me3.K2	146/3709	4297/13281	1	1	0.526316	146	10604	0.0137684
C1	H3K4me3.K3	128/3709	3264/13281	1	1	0.526316	128	10604	0.0120709
C1	H3K4me3.K4	2944/3709	4028/13281	0	0	0	2944	10604	0.277631
C2	H3K4me3.K1	52/481	1950/13281	0.995302	1	0.789474	52	2941	0.0176811
C2	H3K4me3.K2	286/481	4297/13281	1.54167e-35	6.16666e-35	4.86842e-35	286	2941	0.0972458
C2	H3K4me3.K3	84/481	3264/13281	0.999947	1	0.789474	84	2941	0.0285617
C2	H3K4me3.K4	69/481	4028/13281	1	1	0.789474	69	2941	0.0234614
C3	H3K4me3.K1	29/1695	1950/13281	1	1	0.789474	29	6277	0.00462004
C3	H3K4me3.K2	1542/1695	4297/13281	0	0	0	1542	6277	0.245659
C3	H3K4me3.K3	74/1695	3264/13281	1	1	0.789474	74	6277	0.0117891
C3	H3K4me3.K4	60/1695	4028/13281	1	1	0.789474	60	6277	0.00955871
C4	H3K4me3.K1	33/1405	1950/13281	1	1	0.789474	33	6954	0.00474547
C4	H3K4me3.K2	1134/1405	4297/13281	0	0	0	1134	6954	0.163072
C4	H3K4me3.K3	77/1405	3264/13281	1	1	0.789474	77	6954	0.0110728
C4	H3K4me3.K4	175/1405	4028/13281	1	1	0.789474	175	6954	0.0251654
C5	H3K4me3.K1	678/1922	1950/13281	8.4624e-137	3.38496e-136	1.78156e-136	678	7444	0.0910801
C5	H3K4me3.K2	123/1922	4297/13281	1	1	0.526316	123	7444	0.0165234
C5	H3K4me3.K3	892/1922	3264/13281	1.76193e-114	3.52385e-114	1.85466e-114	892	7444	0.119828
C5	H3K4me3.K4	309/1922	4028/13281	1	1	0.526316	309	7444	0.0415099
C6	H3K4me3.K1	29/530	1950/13281	1	1	0.526316	29	5926	0.00489369
C6	H3K4me3.K2	319/530	4297/13281	3.92881e-41	1.57152e-40	8.27117e-41	319	5926	0.0538306
C6	H3K4me3.K3	167/530	3264/13281	0.000135388	0.000270775	0.000142513	167	5926	0.0281809
C6	H3K4me3.K4	29/530	4028/13281	1	1	0.526316	29	5926	0.00489369

## Sheet: Table S6
Table S6. The gene ontology enrichment analysis of overlapped 2147 genes in Fig2d.
GO biological process complete	Triticum aestivum - REFLIST (103263)	upload_1 (2032)	upload_1 (expected)	upload_1 (over/under)	upload_1 (fold Enrichment)	upload_1 (raw P-value)	upload_1 (FDR)
regulation of root meristem growth (GO:0010082)	3	3	0.06	+	50.82	0.000137	0.00271
regulation of meristem growth (GO:0010075)	3	3	0.06	+	50.82	0.000137	0.00269
guanine transport (GO:0015854)	6	3	0.12	+	25.41	0.000553	0.00907
adenine transport (GO:0015853)	6	3	0.12	+	25.41	0.000553	0.00904
root morphogenesis (GO:0010015)	6	3	0.12	+	25.41	0.000553	0.009
regulation of gibberellic acid mediated signaling pathway (GO:0009937)	7	3	0.14	+	21.78	0.000778	0.0124
gamma-aminobutyric acid transport (GO:0015812)	19	7	0.37	+	18.72	4.71e-07	1.66e-05
L-alanine transport (GO:0015808)	19	7	0.37	+	18.72	4.71e-07	1.64e-05
alanine transport (GO:0032328)	19	7	0.37	+	18.72	4.71e-07	1.63e-05
L-glutamate transmembrane transport (GO:0015813)	27	9	0.53	+	16.94	2.15e-08	8.81e-07
acidic amino acid transport (GO:0015800)	27	9	0.53	+	16.94	2.15e-08	8.72e-07
L-lysine transport (GO:1902022)	27	9	0.53	+	16.94	2.15e-08	8.63e-07
L-lysine transmembrane transport (GO:1903401)	27	9	0.53	+	16.94	2.15e-08	8.55e-07
L-glutamate import (GO:0051938)	27	9	0.53	+	16.94	2.15e-08	8.46e-07
neutral amino acid transport (GO:0015804)	22	7	0.43	+	16.17	1.06e-06	3.4e-05
regulation of root morphogenesis (GO:2000067)	14	4	0.28	+	14.52	0.000341	0.00616
ammonium transmembrane transport (GO:0072488)	21	6	0.41	+	14.52	1.07e-05	0.000289
regulation of plant organ morphogenesis (GO:1905421)	14	4	0.28	+	14.52	0.000341	0.00613
specification of plant organ axis polarity (GO:0090708)	14	4	0.28	+	14.52	0.000341	0.00611
xyloglucan biosynthetic process (GO:0009969)	80	22	1.57	+	13.98	4.68e-17	1.68e-14
GDP-fucose transmembrane transport (GO:0015783)	12	3	0.24	+	12.7	0.00274	0.0373
plant organ morphogenesis (GO:1905392)	29	7	0.57	+	12.27	5.04e-06	0.000149
purine nucleotide-sugar transmembrane transport (GO:0090480)	18	4	0.35	+	11.29	0.000766	0.0122
regulation of root development (GO:2000280)	36	8	0.71	+	11.29	1.81e-06	5.58e-05
gibberellic acid mediated signaling pathway (GO:0009740)	25	5	0.49	+	10.16	0.000254	0.00474
cellular response to gibberellin stimulus (GO:0071370)	25	5	0.49	+	10.16	0.000254	0.00472
gibberellin mediated signaling pathway (GO:0010476)	25	5	0.49	+	10.16	0.000254	0.0047
plasmodesmata-mediated intercellular transport (GO:0010497)	45	8	0.89	+	9.03	7.77e-06	0.000217
vegetative to reproductive phase transition of meristem (GO:0010228)	23	4	0.45	+	8.84	0.0017	0.0241
intercellular transport (GO:0010496)	46	8	0.91	+	8.84	8.97e-06	0.000246
auxin export across the plasma membrane (GO:0010315)	53	9	1.04	+	8.63	2.95e-06	8.94e-05
regulation of auxin mediated signaling pathway (GO:0010928)	53	9	1.04	+	8.63	2.95e-06	8.87e-05
auxin homeostasis (GO:0010252)	61	10	1.2	+	8.33	1.11e-06	3.53e-05
oxylipin biosynthetic process (GO:0031408)	104	17	2.05	+	8.31	2.23e-10	1.6e-08
oxylipin metabolic process (GO:0031407)	104	17	2.05	+	8.31	2.23e-10	1.57e-08
axis specification (GO:0009798)	26	4	0.51	+	7.82	0.00254	0.0348
specification of axis polarity (GO:0065001)	26	4	0.51	+	7.82	0.00254	0.0346
tripeptide transport (GO:0042939)	33	5	0.65	+	7.7	0.000787	0.0125
negative regulation of cell population proliferation (GO:0008285)	53	8	1.04	+	7.67	2.25e-05	0.000555
regulation of cell population proliferation (GO:0042127)	56	8	1.1	+	7.26	3.22e-05	0.000746
dipeptide transport (GO:0042938)	35	5	0.69	+	7.26	0.001	0.0154
auxin polar transport (GO:0009926)	63	9	1.24	+	7.26	1.04e-05	0.000283
dipeptide transmembrane transport (GO:0035442)	35	5	0.69	+	7.26	0.001	0.0153
phosphatidylcholine metabolic process (GO:0046470)	78	11	1.53	+	7.17	1.24e-06	3.88e-05
L-alpha-amino acid transmembrane transport (GO:1902475)	64	9	1.26	+	7.15	1.17e-05	0.000309
L-amino acid transport (GO:0015807)	67	9	1.32	+	6.83	1.63e-05	0.000422
chloride transport (GO:0006821)	46	6	0.91	+	6.63	0.000489	0.00841
chloride transmembrane transport (GO:1902476)	46	6	0.91	+	6.63	0.000489	0.00838
galactose catabolic process (GO:0019388)	47	6	0.92	+	6.49	0.000542	0.00902
galactose catabolic process via UDP-galactose (GO:0033499)	47	6	0.92	+	6.49	0.000542	0.00898
response to gibberellin (GO:0009739)	51	6	1	+	5.98	0.000803	0.0126
hexose catabolic process (GO:0019320)	53	6	1.04	+	5.75	0.000965	0.015
auxin-activated signaling pathway (GO:0009734)	277	31	5.45	+	5.69	1.18e-13	1.86e-11
cellular response to auxin stimulus (GO:0071365)	277	31	5.45	+	5.69	1.18e-13	1.79e-11
dicarboxylic acid transport (GO:0006835)	81	9	1.59	+	5.65	6.34e-05	0.0014
phospholipid catabolic process (GO:0009395)	75	8	1.48	+	5.42	0.000208	0.00397
establishment or maintenance of cell polarity (GO:0007163)	47	5	0.92	+	5.41	0.00326	0.0438
auxin transport (GO:0060918)	88	9	1.73	+	5.2	0.000114	0.00237
hormone transport (GO:0009914)	88	9	1.73	+	5.2	0.000114	0.00236
monosaccharide catabolic process (GO:0046365)	59	6	1.16	+	5.17	0.0016	0.023
cell wall polysaccharide biosynthetic process (GO:0070592)	227	23	4.47	+	5.15	9.69e-10	5.38e-08
monosaccharide transmembrane transport (GO:0015749)	89	9	1.75	+	5.14	0.000123	0.00246
xyloglucan metabolic process (GO:0010411)	230	23	4.53	+	5.08	1.22e-09	6.6e-08
glutathione metabolic process (GO:0006749)	293	29	5.77	+	5.03	1.13e-11	1.06e-09
cell wall macromolecule biosynthetic process (GO:0044038)	238	23	4.68	+	4.91	2.23e-09	1.1e-07
cellular component macromolecule biosynthetic process (GO:0070589)	238	23	4.68	+	4.91	2.23e-09	1.09e-07
export across plasma membrane (GO:0140115)	278	25	5.47	+	4.57	1.78e-09	9.01e-08
root development (GO:0048364)	193	17	3.8	+	4.48	8.75e-07	2.92e-05
root system development (GO:0022622)	193	17	3.8	+	4.48	8.75e-07	2.9e-05
carbohydrate transmembrane transport (GO:0034219)	297	26	5.84	+	4.45	1.44e-09	7.56e-08
amino acid transport (GO:0006865)	289	25	5.69	+	4.4	3.69e-09	1.73e-07
amino acid transmembrane transport (GO:0003333)	257	22	5.06	+	4.35	3.69e-08	1.41e-06
xenobiotic export from cell (GO:0046618)	198	16	3.9	+	4.11	5.07e-06	0.000149
xenobiotic detoxification by transmembrane export across the plasma membrane (GO:1990961)	198	16	3.9	+	4.11	5.07e-06	0.000148
carbohydrate transport (GO:0008643)	335	27	6.59	+	4.1	3.66e-09	1.74e-07
cellular modified amino acid metabolic process (GO:0006575)	378	30	7.44	+	4.03	7.14e-10	4.14e-08
glucan biosynthetic process (GO:0009250)	342	27	6.73	+	4.01	5.49e-09	2.43e-07
plant organ development (GO:0099402)	343	27	6.75	+	4	5.82e-09	2.55e-07
regulation of growth (GO:0040008)	104	8	2.05	+	3.91	0.00154	0.0221
protein glycosylation (GO:0006486)	470	36	9.25	+	3.89	3.77e-11	3.3e-09
macromolecule glycosylation (GO:0043413)	470	36	9.25	+	3.89	3.77e-11	3.23e-09
glycoprotein biosynthetic process (GO:0009101)	473	36	9.31	+	3.87	4.44e-11	3.72e-09
shoot system development (GO:0048367)	396	30	7.79	+	3.85	1.96e-09	9.78e-08
glycosylation (GO:0070085)	605	45	11.91	+	3.78	3.71e-13	4.72e-11
xenobiotic transport (GO:0042908)	224	16	4.41	+	3.63	2.13e-05	0.00053
glycoprotein metabolic process (GO:0009100)	510	36	10.04	+	3.59	3.05e-10	1.97e-08
organic acid transmembrane transport (GO:1903825)	316	22	6.22	+	3.54	9.96e-07	3.27e-05
carboxylic acid transmembrane transport (GO:1905039)	316	22	6.22	+	3.54	9.96e-07	3.24e-05
hemicellulose metabolic process (GO:0010410)	361	25	7.1	+	3.52	2.07e-07	7.55e-06
response to auxin (GO:0009733)	613	42	12.06	+	3.48	2.53e-11	2.27e-09
organophosphate catabolic process (GO:0046434)	241	16	4.74	+	3.37	4.85e-05	0.00109
cell wall biogenesis (GO:0042546)	528	34	10.39	+	3.27	8.14e-09	3.49e-07
system development (GO:0048731)	710	45	13.97	+	3.22	5.54e-11	4.55e-09
organic acid transport (GO:0015849)	396	25	7.79	+	3.21	1.02e-06	3.3e-05
cell wall polysaccharide metabolic process (GO:0010383)	401	25	7.89	+	3.17	1.26e-06	3.92e-05
hydrogen peroxide catabolic process (GO:0042744)	679	42	13.36	+	3.14	4.75e-10	2.88e-08
hydrogen peroxide metabolic process (GO:0042743)	679	42	13.36	+	3.14	4.75e-10	2.83e-08
cellular polysaccharide biosynthetic process (GO:0033692)	455	28	8.95	+	3.13	3.84e-07	1.37e-05
regulation of developmental process (GO:0050793)	329	20	6.47	+	3.09	1.96e-05	0.000493
hormone-mediated signaling pathway (GO:0009755)	1180	71	23.22	+	3.06	2.03e-15	6.67e-13
cellular response to hormone stimulus (GO:0032870)	1180	71	23.22	+	3.06	2.03e-15	6.16e-13
cellular response to endogenous stimulus (GO:0071495)	1186	71	23.34	+	3.04	2.58e-15	7.26e-13
cellular carbohydrate biosynthetic process (GO:0034637)	572	34	11.26	+	3.02	5.05e-08	1.9e-06
reactive oxygen species metabolic process (GO:0072593)	709	42	13.95	+	3.01	1.58e-09	8.21e-08
anatomical structure morphogenesis (GO:0009653)	392	23	7.71	+	2.98	8.38e-06	0.000231
detoxification (GO:0098754)	1161	67	22.85	+	2.93	7.8e-14	1.34e-11
polysaccharide biosynthetic process (GO:0000271)	503	29	9.9	+	2.93	8.39e-07	2.82e-05
response to toxic substance (GO:0009636)	1169	67	23	+	2.91	1.05e-13	1.73e-11
glucan metabolic process (GO:0044042)	681	38	13.4	+	2.84	4.06e-08	1.54e-06
regulation of hormone levels (GO:0010817)	364	20	7.16	+	2.79	7.43e-05	0.00162
regulation of signal transduction (GO:0009966)	256	14	5.04	+	2.78	0.000879	0.0137
cellular response to ethylene stimulus (GO:0071369)	220	12	4.33	+	2.77	0.00203	0.0287
ethylene-activated signaling pathway (GO:0009873)	220	12	4.33	+	2.77	0.00203	0.0286
cellular response to organic substance (GO:0071310)	1400	76	27.55	+	2.76	3.27e-14	6.44e-12
response to ethylene (GO:0009723)	240	13	4.72	+	2.75	0.00143	0.0208
regulation of cell communication (GO:0010646)	259	14	5.1	+	2.75	0.000977	0.0152
regulation of signaling (GO:0023051)	259	14	5.1	+	2.75	0.000977	0.0151
amide transport (GO:0042886)	278	15	5.47	+	2.74	0.000668	0.0107
cellular response to toxic substance (GO:0097237)	954	51	18.77	+	2.72	8.51e-10	4.86e-08
cellular detoxification (GO:1990748)	954	51	18.77	+	2.72	8.51e-10	4.79e-08
cell wall macromolecule metabolic process (GO:0044036)	489	26	9.62	+	2.7	1.17e-05	0.000311
multicellular organism development (GO:0007275)	884	47	17.4	+	2.7	4.51e-09	2.04e-07
cellular response to chemical stimulus (GO:0070887)	2440	127	48.01	+	2.65	2.01e-21	9.89e-19
cellular oxidant detoxification (GO:0098869)	912	47	17.95	+	2.62	1.82e-08	7.63e-07
cellular glucan metabolic process (GO:0006073)	650	33	12.79	+	2.58	2.16e-06	6.61e-05
lipid modification (GO:0030258)	287	14	5.65	+	2.48	0.00242	0.0334
response to chemical (GO:0042221)	3893	189	76.61	+	2.47	6.73e-28	2.65e-24
response to hormone (GO:0009725)	1694	82	33.33	+	2.46	1.45e-12	1.74e-10
response to endogenous stimulus (GO:0009719)	1700	82	33.45	+	2.45	1.59e-12	1.84e-10
response to oxidative stress (GO:0006979)	948	45	18.65	+	2.41	2.83e-07	1.02e-05
export from cell (GO:0140352)	561	26	11.04	+	2.36	0.000113	0.00237
glycerophospholipid metabolic process (GO:0006650)	476	22	9.37	+	2.35	0.000406	0.00718
carbohydrate biosynthetic process (GO:0016051)	781	36	15.37	+	2.34	8.02e-06	0.000223
anatomical structure development (GO:0048856)	1324	61	26.05	+	2.34	5.18e-09	2.32e-07
multicellular organismal process (GO:0032501)	1040	47	20.47	+	2.3	5.74e-07	1.95e-05
cellular polysaccharide metabolic process (GO:0044264)	787	35	15.49	+	2.26	1.83e-05	0.000466
response to organic substance (GO:0010033)	2073	91	40.79	+	2.23	1.25e-11	1.15e-09
cell wall organization or biogenesis (GO:0071554)	1138	49	22.39	+	2.19	1.12e-06	3.53e-05
glycerolipid metabolic process (GO:0046486)	543	23	10.69	+	2.15	0.001	0.0153
negative regulation of proteolysis (GO:0045861)	547	23	10.76	+	2.14	0.00107	0.0161
negative regulation of endopeptidase activity (GO:0010951)	547	23	10.76	+	2.14	0.00107	0.0161
regulation of endopeptidase activity (GO:0052548)	547	23	10.76	+	2.14	0.00107	0.016
negative regulation of peptidase activity (GO:0010466)	547	23	10.76	+	2.14	0.00107	0.016
sulfur compound metabolic process (GO:0006790)	936	39	18.42	+	2.12	3e-05	0.000712
regulation of peptidase activity (GO:0052547)	553	23	10.88	+	2.11	0.00118	0.0175
negative regulation of hydrolase activity (GO:0051346)	556	23	10.94	+	2.1	0.00124	0.0183
response to other organism (GO:0051707)	1101	44	21.67	+	2.03	3.01e-05	0.000711
response to external biotic stimulus (GO:0043207)	1101	44	21.67	+	2.03	3.01e-05	0.000706
cell wall organization (GO:0071555)	776	31	15.27	+	2.03	0.000413	0.00726
anion transport (GO:0006820)	658	26	12.95	+	2.01	0.00118	0.0175
external encapsulating structure organization (GO:0045229)	792	31	15.58	+	1.99	0.000502	0.00857
cellular carbohydrate metabolic process (GO:0044262)	1306	50	25.7	+	1.95	2.31e-05	0.000566
response to external stimulus (GO:0009605)	1369	52	26.94	+	1.93	1.59e-05	0.000414
biological process involved in interspecies interaction between organisms (GO:0044419)	1208	45	23.77	+	1.89	0.000108	0.00228
small molecule catabolic process (GO:0044282)	675	25	13.28	+	1.88	0.00348	0.0465
regulation of hydrolase activity (GO:0051336)	730	27	14.36	+	1.88	0.00306	0.0412
transmembrane transport (GO:0055085)	4815	178	94.75	+	1.88	7.31e-15	1.52e-12
response to biotic stimulus (GO:0009607)	1214	44	23.89	+	1.84	0.000261	0.0048
polysaccharide metabolic process (GO:0005976)	1187	43	23.36	+	1.84	0.000234	0.00445
developmental process (GO:0032502)	1913	68	37.64	+	1.81	7.2e-06	0.000206
regulation of RNA biosynthetic process (GO:2001141)	6389	221	125.72	+	1.76	3.39e-15	8.92e-13
regulation of DNA-templated transcription (GO:0006355)	6389	221	125.72	+	1.76	3.39e-15	8.36e-13
regulation of nucleic acid-templated transcription (GO:1903506)	6389	221	125.72	+	1.76	3.39e-15	7.87e-13
signal transduction (GO:0007165)	3380	115	66.51	+	1.73	5.9e-08	2.19e-06
cell communication (GO:0007154)	3542	120	69.7	+	1.72	2.99e-08	1.16e-06
signaling (GO:0023052)	3440	115	67.69	+	1.7	1.12e-07	4.14e-06
regulation of RNA metabolic process (GO:0051252)	6647	221	130.8	+	1.69	1.34e-13	1.89e-11
regulation of nucleobase-containing compound metabolic process (GO:0019219)	6822	221	134.24	+	1.65	1.89e-12	2.13e-10
regulation of macromolecule biosynthetic process (GO:0010556)	6880	222	135.38	+	1.64	2.31e-12	2.52e-10
regulation of cellular biosynthetic process (GO:0031326)	6895	222	135.68	+	1.64	2.47e-12	2.63e-10
regulation of biosynthetic process (GO:0009889)	6898	222	135.74	+	1.64	2.51e-12	2.61e-10
regulation of nitrogen compound metabolic process (GO:0051171)	8307	256	163.46	+	1.57	3.39e-12	3.42e-10
regulation of primary metabolic process (GO:0080090)	8343	256	164.17	+	1.56	5.06e-12	4.87e-10
cellular response to stimulus (GO:0051716)	5926	180	116.61	+	1.54	2.35e-08	9.17e-07
regulation of gene expression (GO:0010468)	7579	230	149.14	+	1.54	2.07e-10	1.51e-08
regulation of cellular metabolic process (GO:0031323)	7722	233	151.95	+	1.53	2.9e-10	1.91e-08
response to stimulus (GO:0050896)	10714	322	210.83	+	1.53	6.51e-14	1.17e-11
regulation of macromolecule metabolic process (GO:0060255)	8953	264	176.18	+	1.5	1.46e-10	1.09e-08
carbohydrate metabolic process (GO:0005975)	3228	95	63.52	+	1.5	0.000191	0.00367
regulation of metabolic process (GO:0019222)	9063	264	178.34	+	1.48	4.02e-10	2.55e-08
regulation of cellular process (GO:0050794)	11166	317	219.72	+	1.44	8.43e-11	6.78e-09
regulation of biological process (GO:0050789)	12851	363	252.88	+	1.44	3.54e-12	3.49e-10
biological regulation (GO:0065007)	14637	388	288.03	+	1.35	1.58e-09	8.11e-08
protein phosphorylation (GO:0006468)	5359	142	105.45	+	1.35	0.000505	0.00858
transport (GO:0006810)	7869	207	154.85	+	1.34	3.58e-05	0.000815
establishment of localization (GO:0051234)	7970	207	156.83	+	1.32	8.07e-05	0.00175
localization (GO:0051179)	8227	208	161.89	+	1.28	0.000323	0.00587
biological_process (GO:0008150)	54739	1210	1077.15	+	1.12	4.49e-09	2.08e-07

## Sheet: Table S7
Table S7. The gene ontology enrichment analysis of overlapped 1197 genes in Extended Data Fig. 2c.
GO biological process complete	Triticum aestivum - REFLIST (103263)	upload_1 (1132)	upload_1 (expected)	upload_1 (over/under)	upload_1 (fold Enrichment)	upload_1 (raw P-value)	upload_1 (FDR)
gamma-aminobutyric acid transport (GO:0015812)	19	4	0.21	+	19.2	0.000103	0.00351
L-alanine transport (GO:0015808)	19	4	0.21	+	19.2	0.000103	0.00348
alanine transport (GO:0032328)	19	4	0.21	+	19.2	0.000103	0.00345
UDP-L-arabinose metabolic process (GO:0033356)	16	3	0.18	+	17.1	0.00108	0.0251
neutral amino acid transport (GO:0015804)	22	4	0.24	+	16.59	0.00017	0.00536
xyloglucan biosynthetic process (GO:0009969)	80	14	0.88	+	15.96	2.24e-12	4.2e-10
vegetative to reproductive phase transition of meristem (GO:0010228)	23	4	0.25	+	15.86	0.000198	0.006
L-glutamate transmembrane transport (GO:0015813)	27	4	0.3	+	13.51	0.000343	0.00958
acidic amino acid transport (GO:0015800)	27	4	0.3	+	13.51	0.000343	0.00951
L-lysine transport (GO:1902022)	27	4	0.3	+	13.51	0.000343	0.00944
L-lysine transmembrane transport (GO:1903401)	27	4	0.3	+	13.51	0.000343	0.00938
L-glutamate import (GO:0051938)	27	4	0.3	+	13.51	0.000343	0.00931
zinc ion transmembrane transport (GO:0071577)	78	9	0.86	+	10.53	4.84e-07	2.84e-05
zinc ion transport (GO:0006829)	81	9	0.89	+	10.14	6.47e-07	3.59e-05
cold acclimation (GO:0009631)	57	6	0.62	+	9.6	6.44e-05	0.00237
auxin export across the plasma membrane (GO:0010315)	53	5	0.58	+	8.61	0.000423	0.0111
regulation of auxin mediated signaling pathway (GO:0010928)	53	5	0.58	+	8.61	0.000423	0.011
auxin homeostasis (GO:0010252)	61	5	0.67	+	7.48	0.000769	0.0188
auxin-activated signaling pathway (GO:0009734)	277	22	3.04	+	7.25	3.37e-12	6.04e-10
cellular response to auxin stimulus (GO:0071365)	277	22	3.04	+	7.25	3.37e-12	5.77e-10
auxin polar transport (GO:0009926)	63	5	0.69	+	7.24	0.000881	0.0212
response to water deprivation (GO:0009414)	80	6	0.88	+	6.84	0.000361	0.00967
xyloglucan metabolic process (GO:0010411)	230	17	2.52	+	6.74	2.61e-09	2.57e-07
response to water (GO:0009415)	82	6	0.9	+	6.67	0.000408	0.0108
xenobiotic export from cell (GO:0046618)	198	14	2.17	+	6.45	1.08e-07	7.91e-06
xenobiotic detoxification by transmembrane export across the plasma membrane (GO:1990961)	198	14	2.17	+	6.45	1.08e-07	7.77e-06
beta-glucan catabolic process (GO:0051275)	85	6	0.93	+	6.44	0.000489	0.0126
cellulose catabolic process (GO:0030245)	85	6	0.93	+	6.44	0.000489	0.0125
response to acid chemical (GO:0001101)	85	6	0.93	+	6.44	0.000489	0.0124
export across plasma membrane (GO:0140115)	278	19	3.05	+	6.23	1.04e-09	1.18e-07
oxylipin biosynthetic process (GO:0031408)	104	7	1.14	+	6.14	0.000221	0.00665
oxylipin metabolic process (GO:0031407)	104	7	1.14	+	6.14	0.000221	0.0066
phospholipid catabolic process (GO:0009395)	75	5	0.82	+	6.08	0.00183	0.0369
phosphatidylcholine metabolic process (GO:0046470)	78	5	0.86	+	5.85	0.00215	0.0427
phosphate ion transport (GO:0006817)	80	5	0.88	+	5.7	0.00238	0.0465
xenobiotic transport (GO:0042908)	224	14	2.46	+	5.7	4.44e-07	2.73e-05
dicarboxylic acid transport (GO:0006835)	81	5	0.89	+	5.63	0.00251	0.0482
cell wall polysaccharide biosynthetic process (GO:0070592)	227	14	2.49	+	5.63	5.16e-07	2.99e-05
cell wall macromolecule biosynthetic process (GO:0044038)	238	14	2.61	+	5.37	8.78e-07	4.81e-05
cellular component macromolecule biosynthetic process (GO:0070589)	238	14	2.61	+	5.37	8.78e-07	4.74e-05
regulation of growth (GO:0040008)	104	6	1.14	+	5.26	0.00132	0.0297
glucan biosynthetic process (GO:0009250)	342	18	3.75	+	4.8	1.23e-07	8.67e-06
peptidyl-threonine dephosphorylation (GO:0035970)	146	7	1.6	+	4.37	0.00149	0.0322
glutathione metabolic process (GO:0006749)	293	14	3.21	+	4.36	8.63e-06	0.000386
cell wall biogenesis (GO:0042546)	528	25	5.79	+	4.32	3.61e-09	3.47e-07
hemicellulose metabolic process (GO:0010410)	361	17	3.96	+	4.3	1.18e-06	6.2e-05
protein glycosylation (GO:0006486)	470	21	5.15	+	4.08	1.58e-07	1.07e-05
macromolecule glycosylation (GO:0043413)	470	21	5.15	+	4.08	1.58e-07	1.05e-05
glycoprotein biosynthetic process (GO:0009101)	473	21	5.19	+	4.05	1.74e-07	1.14e-05
cellulose metabolic process (GO:0030243)	227	10	2.49	+	4.02	0.000302	0.0085
response to auxin (GO:0009733)	613	27	6.72	+	4.02	3.77e-09	3.54e-07
lipid oxidation (GO:0034440)	159	7	1.74	+	4.02	0.00237	0.0465
glycosylation (GO:0070085)	605	26	6.63	+	3.92	1.17e-08	9.63e-07
amino acid transmembrane transport (GO:0003333)	257	11	2.82	+	3.9	0.000195	0.00595
cell wall polysaccharide metabolic process (GO:0010383)	401	17	4.4	+	3.87	4.52e-06	0.000215
cellular glucan metabolic process (GO:0006073)	650	27	7.13	+	3.79	1.22e-08	9.78e-07
amino acid transport (GO:0006865)	289	12	3.17	+	3.79	0.000133	0.00437
glycoprotein metabolic process (GO:0009100)	510	21	5.59	+	3.76	5.62e-07	3.21e-05
glucan metabolic process (GO:0044042)	681	28	7.47	+	3.75	8.1e-09	6.8e-07
anatomical structure morphogenesis (GO:0009653)	392	16	4.3	+	3.72	1.34e-05	0.000586
cellular modified amino acid metabolic process (GO:0006575)	378	15	4.14	+	3.62	3.36e-05	0.00134
cellular polysaccharide biosynthetic process (GO:0033692)	455	18	4.99	+	3.61	5.98e-06	0.00028
transition metal ion transport (GO:0000041)	287	11	3.15	+	3.5	0.000478	0.0124
beta-glucan metabolic process (GO:0051273)	267	10	2.93	+	3.42	0.00101	0.0239
cell wall macromolecule metabolic process (GO:0044036)	489	18	5.36	+	3.36	1.52e-05	0.000649
polysaccharide biosynthetic process (GO:0000271)	503	18	5.51	+	3.26	2.17e-05	0.000919
regulation of hormone levels (GO:0010817)	364	13	3.99	+	3.26	0.000294	0.00833
organic acid transport (GO:0015849)	396	14	4.34	+	3.23	0.000193	0.00595
lipid modification (GO:0030258)	287	10	3.15	+	3.18	0.00169	0.0352
organic acid transmembrane transport (GO:1903825)	316	11	3.46	+	3.18	0.00102	0.0241
carboxylic acid transmembrane transport (GO:1905039)	316	11	3.46	+	3.18	0.00102	0.0239
detoxification (GO:0098754)	1161	40	12.73	+	3.14	8.18e-10	9.77e-08
cellular polysaccharide metabolic process (GO:0044264)	787	27	8.63	+	3.13	4.76e-07	2.84e-05
response to toxic substance (GO:0009636)	1169	40	12.81	+	3.12	9.87e-10	1.14e-07
hydrogen peroxide catabolic process (GO:0042744)	679	23	7.44	+	3.09	4e-06	0.000195
hydrogen peroxide metabolic process (GO:0042743)	679	23	7.44	+	3.09	4e-06	0.000192
export from cell (GO:0140352)	561	19	6.15	+	3.09	2.68e-05	0.00111
cellular carbohydrate biosynthetic process (GO:0034637)	572	19	6.27	+	3.03	3.45e-05	0.00136
hormone-mediated signaling pathway (GO:0009755)	1180	39	12.94	+	3.01	3.99e-09	3.65e-07
cellular response to hormone stimulus (GO:0032870)	1180	39	12.94	+	3.01	3.99e-09	3.57e-07
cellular response to endogenous stimulus (GO:0071495)	1186	39	13	+	3	4.55e-09	3.9e-07
reactive oxygen species metabolic process (GO:0072593)	709	23	7.77	+	2.96	7.85e-06	0.000364
plant-type cell wall organization or biogenesis (GO:0071669)	436	14	4.78	+	2.93	0.00049	0.0124
regulation of RNA biosynthetic process (GO:2001141)	6389	204	70.04	+	2.91	8.25e-42	3.25e-38
regulation of DNA-templated transcription (GO:0006355)	6389	204	70.04	+	2.91	8.25e-42	1.63e-38
regulation of nucleic acid-templated transcription (GO:1903506)	6389	204	70.04	+	2.91	8.25e-42	1.08e-38
regulation of RNA metabolic process (GO:0051252)	6647	205	72.87	+	2.81	6.45e-40	6.35e-37
external encapsulating structure organization (GO:0045229)	792	24	8.68	+	2.76	1.48e-05	0.000642
regulation of nucleobase-containing compound metabolic process (GO:0019219)	6822	205	74.78	+	2.74	2.33e-38	1.84e-35
regulation of macromolecule biosynthetic process (GO:0010556)	6880	204	75.42	+	2.7	2.26e-37	1.48e-34
cell wall organization (GO:0071555)	776	23	8.51	+	2.7	3.08e-05	0.00124
regulation of cellular biosynthetic process (GO:0031326)	6895	204	75.59	+	2.7	3.03e-37	1.71e-34
regulation of biosynthetic process (GO:0009889)	6898	204	75.62	+	2.7	3.22e-37	1.59e-34
response to hormone (GO:0009725)	1694	50	18.57	+	2.69	1.07e-09	1.17e-07
response to endogenous stimulus (GO:0009719)	1700	50	18.64	+	2.68	1.19e-09	1.27e-07
cellular response to organic substance (GO:0071310)	1400	41	15.35	+	2.67	4.1e-08	3.11e-06
regulation of transcription by RNA polymerase II (GO:0006357)	1684	49	18.46	+	2.65	2.44e-09	2.53e-07
cell wall organization or biogenesis (GO:0071554)	1138	33	12.48	+	2.65	1.03e-06	5.49e-05
system development (GO:0048731)	710	20	7.78	+	2.57	0.000188	0.00585
regulation of gene expression (GO:0010468)	7579	209	83.08	+	2.52	5.09e-34	1.82e-31
response to chemical (GO:0042221)	3893	107	42.68	+	2.51	2.91e-17	6.38e-15
cellular response to chemical stimulus (GO:0070887)	2440	67	26.75	+	2.5	3.23e-11	5.1e-09
negative regulation of proteolysis (GO:0045861)	547	15	6	+	2.5	0.00147	0.0323
negative regulation of endopeptidase activity (GO:0010951)	547	15	6	+	2.5	0.00147	0.0321
regulation of endopeptidase activity (GO:0052548)	547	15	6	+	2.5	0.00147	0.0319
negative regulation of peptidase activity (GO:0010466)	547	15	6	+	2.5	0.00147	0.0318
cellular oxidant detoxification (GO:0098869)	912	25	10	+	2.5	4.86e-05	0.00186
cellular response to toxic substance (GO:0097237)	954	26	10.46	+	2.49	5.98e-05	0.00224
cellular detoxification (GO:1990748)	954	26	10.46	+	2.49	5.98e-05	0.00222
regulation of peptidase activity (GO:0052547)	553	15	6.06	+	2.47	0.00163	0.0344
regulation of cellular metabolic process (GO:0031323)	7722	209	84.65	+	2.47	8.83e-33	2.9e-30
negative regulation of hydrolase activity (GO:0051346)	556	15	6.1	+	2.46	0.00171	0.0355
regulation of nitrogen compound metabolic process (GO:0051171)	8307	224	91.06	+	2.46	3.34e-35	1.46e-32
polysaccharide metabolic process (GO:0005976)	1187	32	13.01	+	2.46	7.92e-06	0.000363
regulation of primary metabolic process (GO:0080090)	8343	224	91.46	+	2.45	5.8e-35	2.28e-32
anatomical structure development (GO:0048856)	1324	35	14.51	+	2.41	3.95e-06	0.000194
positive regulation of DNA-templated transcription (GO:0045893)	985	26	10.8	+	2.41	7.85e-05	0.00287
positive regulation of RNA biosynthetic process (GO:1902680)	985	26	10.8	+	2.41	7.85e-05	0.00284
positive regulation of nucleic acid-templated transcription (GO:1903508)	985	26	10.8	+	2.41	7.85e-05	0.00281
carbohydrate biosynthetic process (GO:0016051)	781	20	8.56	+	2.34	0.000763	0.0188
response to organic substance (GO:0010033)	2073	53	22.72	+	2.33	5.63e-08	4.18e-06
regulation of macromolecule metabolic process (GO:0060255)	8953	228	98.15	+	2.32	2.47e-32	7.48e-30
response to oxidative stress (GO:0006979)	948	24	10.39	+	2.31	0.000239	0.00704
positive regulation of cellular biosynthetic process (GO:0031328)	1031	26	11.3	+	2.3	0.000137	0.00446
positive regulation of macromolecule biosynthetic process (GO:0010557)	1031	26	11.3	+	2.3	0.000137	0.00442
positive regulation of biosynthetic process (GO:0009891)	1031	26	11.3	+	2.3	0.000137	0.00439
regulation of metabolic process (GO:0019222)	9063	228	99.35	+	2.29	1.98e-31	5.59e-29
multicellular organism development (GO:0007275)	884	21	9.69	+	2.17	0.00167	0.0352
cellular carbohydrate metabolic process (GO:0044262)	1306	30	14.32	+	2.1	0.00025	0.0073
positive regulation of RNA metabolic process (GO:0051254)	1141	26	12.51	+	2.08	0.000838	0.0203
response to other organism (GO:0051707)	1101	25	12.07	+	2.07	0.00115	0.0263
response to external biotic stimulus (GO:0043207)	1101	25	12.07	+	2.07	0.00115	0.0262
positive regulation of nucleobase-containing compound metabolic process (GO:0045935)	1165	26	12.77	+	2.04	0.000976	0.0233
regulation of cellular process (GO:0050794)	11166	244	122.41	+	1.99	3.16e-25	7.79e-23
response to biotic stimulus (GO:0009607)	1214	26	13.31	+	1.95	0.00201	0.0404
regulation of biological process (GO:0050789)	12851	271	140.88	+	1.92	5.9e-26	1.55e-23
response to external stimulus (GO:0009605)	1369	28	15.01	+	1.87	0.00241	0.0468
biological regulation (GO:0065007)	14637	288	160.46	+	1.79	4e-23	9.28e-21
transmembrane transport (GO:0055085)	4815	94	52.78	+	1.78	1.4e-07	9.65e-06
developmental process (GO:0032502)	1913	37	20.97	+	1.76	0.00124	0.0282
signal transduction (GO:0007165)	3380	64	37.05	+	1.73	5.07e-05	0.00192
signaling (GO:0023052)	3440	64	37.71	+	1.7	8.41e-05	0.00293
response to stimulus (GO:0050896)	10714	199	117.45	+	1.69	3.13e-13	6.5e-11
cell communication (GO:0007154)	3542	65	38.83	+	1.67	0.000106	0.00351
cellular response to stimulus (GO:0051716)	5926	97	64.96	+	1.49	0.000145	0.00462
biological_process (GO:0008150)	54739	708	600.07	+	1.18	1.32e-10	1.68e-08
