# Supplementary material for: Uncovering transcriptional regulatory network during regeneration for boosting wheat transformation
Source: Research Square preprint supplement (doi:10.21203/rs.3.rs-2192210/v1), 2022-10-28
Supplement: Supplementary file 3 [file 2db07382aebdbf7a6bf5fb62.xlsx]

## Sheet: Table S1
Table S1. Clustering of differentially expressed genes.
#Column 8 to 10 contain information about orthologous genes in Arabidopsis obtained from BioMart, where NA represents that the wheat gene has no ortholgous gene in Arabidopsis. If there is more than one orthologous gene, separate them with semicolons. "fun" stands for gene annotations downloaded from the tair website.
GeneID	Cluster	DAI0	DAI3	DAI6	DAI9	DAI12	tairID	tairName	fun
TraesCS1A02G000400	C1	0.281928	0.0525415	0.100132	0.112183	0.188907	NA	NA	NA
TraesCS1A02G000700	C1	1.84363	0.103725	0	0.731297	1.61461	NA	NA	NA
TraesCS1A02G000900	C1	1.14567	0.176407	0.300699	0.872065	0.966865	NA	NA	NA
TraesCS1A02G001000	C1	0.454659	0.148587	0.245495	0.282589	0.273197	NA	NA	NA
TraesCS1A02G001400	C1	0.401226	0.0576021	0.130586	0.162851	0.205923	NA	NA	NA
TraesCS1A02G001600	C1	1.00418	0.0892312	0.19596	0.425049	0.872349	NA	NA	NA
TraesCS1A02G001800	C1	18.5511	9.24002	8.03111	13.093	18.8153	AT2G33450	RPL28	Ribosomal L28 family;(source:Araport11)
TraesCS1A02G003700	C1	0.426096	0.0405294	0	0	0	NA	NA	NA
TraesCS1A02G005900	C1	19.7154	7.4654	7.29577	9.49977	8.56201	AT3G10640;AT5G04850	VPS60.1;VPS60.2	SNF7 family protein;(source:Araport11);SNF7 family protein;(source:Araport11)
TraesCS1A02G007400	C1	0.465266	0	0	0	0	NA	NA	NA
TraesCS1A02G008400	C1	1.11635	0.955342	0.496189	0.852624	0.47154	NA	NA	NA
TraesCS1A02G009100	C1	0.457722	0.257939	0.139597	0.10871	0.067331	NA	NA	NA
TraesCS1A02G013600	C1	1.60433	0	0	0.0777952	0.0744289	NA	NA	NA
TraesCS1A02G014100	C1	112.804	5.94829	0.542765	0	0	NA	NA	NA
TraesCS1A02G021100	C1	2.18591	0.0967536	0	0	0.0519141	AT3G29590;AT3G29635;AT3G29636;AT3G29670;AT3G29680;AT3G29690;AT3G29720;AT5G39050;AT5G39080;AT5G39090;AT5G61160	5MAT;AT3G29635;AT3G29636;PMAT2;AT3G29680;AT3G29690;AT3G29720;PMAT1;AT5G39080;AT5G39090;ACT	At3g29590 (At5MAT) encodes a malonyl-CoA:anthocyanidin 5-O-glucoside-6"-O-malonyltransferase that is coordinately expressed with a epistatic 5-O-anthocyanidin glucosyltransferase (At4g14090). The enzyme is involved in the malonylation of anthocyanins in Arabidopsis.;HXXXD-type acyl-transferase family protein;(source:Araport11);transferase-like protein;(source:Araport11);Encodes a malonyltransfera…
TraesCS1A02G021200	C1	0.0858753	0.0422211	0	0	0	AT1G49260;AT1G53470;AT1G78610;AT2G17000;AT2G17010;AT3G14810	AT1G49260;MSL4;MSL6;MSL7;MSL8;MSL5	mechanosensitive ion channel-like protein;(source:Araport11);mechanosensitive channel of small conductance-like 4;(source:Araport11);mechanosensitive channel of small conductance-like 6;(source:Araport11);Mechanosensitive ion channel family protein;(source:Araport11);MSL8 encodes a protein with similarity to mechano-sensitive channel proteins. MSL8 is expressed specifically in pollen and germinat…
TraesCS1A02G026200	C1	5.50894	0.776065	1.50052	3.10597	3.3061	NA	NA	NA
TraesCS1A02G029800	C1	41.4817	4.59039	4.03842	9.27967	10.9467	NA	NA	NA
TraesCS1A02G030100	C1	2.35446	1.90863	1.25586	1.63205	1.39313	AT2G37660	AT2G37660	NAD(P)-binding Rossmann-fold superfamily protein;(source:Araport11)
TraesCS1A02G030600	C1	7.81745	6.58271	2.87941	4.76574	3.41911	AT2G29020;AT5G59410	AT2G29020;AT5G59410	Rab5-interacting family protein;(source:Araport11);Rab5-interacting family protein;(source:Araport11)
TraesCS1A02G033200	C1	3.61348	0.0848106	0.0315887	0.202432	0.104517	AT2G41640;AT3G10320;AT3G57380	AT2G41640;AT3G10320;AT3G57380	Glycosyltransferase family 61 protein;(source:Araport11);MUCI21 is a GT61 protein required for the production of highly branched xylan in seed coat mucilage. MUCI21 likely decorates xylan with xylose side chains that seem to be necessary for pectin attachment to the seed surface.;Glycosyltransferase family 61 protein;(source:Araport11)
TraesCS1A02G033500	C1	1.38747	0	0.0390295	0.164326	0.212495	AT2G28900	OEP161	Encodes AtOEP16, a 16-KDa plastid outer membrane protein involved in plastid import of protochlorophyllide oxidoreductase A. Predominantly expressed in leaves and is also inducible by cold treatment.
TraesCS1A02G033600	C1	10.9306	2.4928	2.73196	3.63489	3.64711	AT2G28900	OEP161	Encodes AtOEP16, a 16-KDa plastid outer membrane protein involved in plastid import of protochlorophyllide oxidoreductase A. Predominantly expressed in leaves and is also inducible by cold treatment.
TraesCS1A02G033700	C1	0.69448	0.0273426	0	0	0.0266371	AT1G07630;AT2G28890	PLL5;PLL4	Encodes a protein phosphatase 2C like gene, similar to POL. Involved in leaf development. Knockout mutants have abnormally shaped leaves.;Encodes a protein phosphatase 2C like gene, similar to POL. Involved in leaf development. Knockout mutants have abnormally shaped leaves.
TraesCS1A02G035200	C1	1.34699	0.605277	0.0180227	0	0.325248	AT1G07640;AT2G28810;AT2G37590;AT3G55370	OBP2;DOF2.2;DOF2.4;OBP3	A member of the DOF transcription factors. Prominently expressed in the phloem of leaves and other organs. Expression is induced by wounding, MeJA and insect feeding. Upregulates glucosinolate biosynthesis. PEAR protein involved in the formation of a short-range concentration gradient that peaks at protophloem sieve elements, and activates gene expression that promotes radial growth. Locally prom…
TraesCS1A02G036200	C1	0.578795	0.049909	0	0.0886464	0.327498	NA	NA	NA
TraesCS1A02G037200	C1	73.4065	19.1153	40.8179	3.80536	1.57	NA	NA	NA
TraesCS1A02G038100	C1	215.715	70.9849	169.749	171.03	144.508	NA	NA	NA
TraesCS1A02G038200	C1	899.536	190.981	613.971	574.655	548.603	NA	NA	NA
TraesCS1A02G039100	C1	0.999387	0.376666	0.764961	0.669076	0.857399	NA	NA	NA
TraesCS1A02G041200	C1	2.08863	0.129657	0	0.148598	0.134974	NA	NA	NA
TraesCS1A02G041300	C1	8.00136	1.01828	0	0.547862	0.505447	NA	NA	NA
TraesCS1A02G045700	C1	121.462	80.6958	55.729	55.16	51.9415	AT1G19550;AT1G19570;AT1G75270	AT1G19550;DHAR1;DHAR2	Glutathione S-transferase family protein;(source:Araport11);Encodes a member of the dehydroascorbate reductase gene family. Critical for a mutualistic symbiosis between the host Arabidopsis and the root colonizing fungus Piriformospora indica.Encodes about 50-60% of extractable leaf GSH-dependent DHAR activity, but single knockout mutants show unaltered ascorbate and glutathione status in optimal…
TraesCS1A02G046400	C1	0.273452	0.0971139	0	0	0	AT3G06080;AT5G19160	TBL10;TBL11	Encodes a member of the TBL (TRICHOME BIREFRINGENCE-LIKE) gene family containing a plant-specific DUF231 (domain of unknown function) domain. TBL gene family has 46 members, two of which (TBR/AT5G06700 and TBL3/AT5G01360) have been shown to be involved in the synthesis and deposition of secondary wall cellulose, presumably by influencing the esterification state of pectic polymers. A nomenclature…
TraesCS1A02G046600	C1	29.4344	28.7117	24.7185	24.01	17.4813	AT3G46220	AT3G46220	E3 ligase that mediates ufmylation. Part of complex with C53 and the ER-resident adaptor protein DDRGK1. Involved in the pathway that links ribosome-associated quality control with selective autophagy at the ER.
TraesCS1A02G047000	C1	18.1328	16.1196	10.8372	14.9373	10.0505	AT1G07670;AT1G07810	ECA4;ECA1	TPLATE complex protein involved in clathrin-mediated endocytosis.;Encodes an ER-type Ca2+-pumping ATPase. The mRNA is cell-to-cell mobile.
TraesCS1A02G050800	C1	0.999739	0	0	0	0	NA	NA	NA
TraesCS1A02G050900	C1	78.0354	0.110788	0	0	0	NA	NA	NA
TraesCS1A02G051500	C1	69.2316	38.8884	29.2661	46.3635	47.5324	NA	NA	NA
TraesCS1A02G051800	C1	5.86848	5.02396	4.21493	3.21451	1.48699	AT2G37330	ALS3	Encodes an ABC transporter-like protein, without an ATPase domain, required for aluminum (Al) resistance/tolerance and may function to redistribute accumulated Al away from sensitive tissues in order to protect the growing root from the toxic effects of Al.
TraesCS1A02G055900	C1	0.346351	0.283332	0.0905281	0	0	AT1G32860;AT5G42100	AT1G32860;ATBG_PPAP	Glycosyl hydrolase superfamily protein;(source:Araport11);encodes a plasmodesmal (Pd)-associated membrane protein involved in plasmodesmal callose degradation, i.e. beta-1,3-glucanase (EC 3.2.1.39), and functions in the gating of Pd
TraesCS1A02G056700	C1	0.874165	0.0422674	0	0.195114	0.686264	NA	NA	NA
TraesCS1A02G056800	C1	4.54195	0.0617755	0.0749658	0.303363	1.13872	NA	NA	NA
TraesCS1A02G057200	C1	1.90124	0.412371	0.401984	0.526295	0.407493	AT1G09940;AT1G58290;AT2G31250	HEMA2;HEMA1;HEMA3	Encodes glutamyl-tRNA reductase. Involved in heme biosynthesis in non-photosynthetic tissues and induced by oxidative stress in photosynthetic tissues to supply heme for defensive hemoproteins;Encodes a protein with glutamyl-tRNA reductase (GluTR) activity, catalyzing the NADPH-dependent reduction of Glu-tRNA(Glu) to glutamate 1-semialdehyde (GSA) with the release of free tRNA(Glu). It is involve…
TraesCS1A02G062000	C1	3.80258	0.502605	1.46414	0	0	AT1G57550;AT2G38905	AT1G57550;AT2G38905	Low temperature and salt responsive protein family;(source:Araport11);Low temperature and salt responsive protein family;(source:Araport11)
TraesCS1A02G062500	C1	2.33982	0.606068	0.0605164	0	0.0289784	NA	NA	NA
TraesCS1A02G062600	C1	6.60603	0.51415	0.122697	0	0	NA	NA	NA
TraesCS1A02G062700	C1	12.5581	1.96234	0.0524325	0	0	NA	NA	NA
TraesCS1A02G062900	C1	8.90315	2.53424	0.361857	0	0	NA	NA	NA
TraesCS1A02G064800	C1	2.40029	1.98414	1.60758	1.79066	1.17476	AT1G16980;AT1G78580;AT4G27550	TPS2;TPS1;TPS4	Encodes an enzyme putatively involved in trehalose biosynthesis. The protein has a trehalose synthase (TPS)-like domain that may or may not be active but no trehalose phosphatase (TPP)-like domain.;Encodes an enzyme putatively involved in trehalose biosynthesis. The protein has a trehalose synthase (TPS)-like domain but no trehalose phosphatase (TPP)-like domain. ATTPS1 is able to complement yeas…
TraesCS1A02G066200	C1	5.78056	3.64295	2.15932	2.66167	1.83431	AT3G53380;AT5G03140	LECRK81;LECRK82	Concanavalin A-like lectin protein kinase family protein;(source:Araport11);Concanavalin A-like lectin protein kinase family protein;(source:Araport11)
TraesCS1A02G066700	C1	7.0726	2.34254	1.03358	2.10149	1.48978	NA	NA	NA
TraesCS1A02G069500	C1	1.79167	0.306924	1.15845	1.24431	1.41907	NA	NA	NA
TraesCS1A02G069600	C1	74.6583	13.5473	9.50777	13.391	18.1009	AT2G40140;AT3G55980	CZF1;SZF1	zinc finger (CCCH-type) family protein;(source:Araport11);salt-inducible zinc finger 1;(source:Araport11)
TraesCS1A02G070200	C1	2.35855	0.885125	0.0427299	0	0	AT2G38240;AT3G11180;AT3G55970;AT5G05600	ANS;AT3G11180;JRG21;AT5G05600	One of 4 paralogs encoding a 2-oxoglutarate/Fe(II)-dependent oxygenases that hydroxylates JA to 12-OH-JA.;One of 4 paralogs encoding a 2-oxoglutarate/Fe(II)-dependent oxygenases that hydroxylates JA to 12-OH-JA.;One of 4 paralogs encoding a 2-oxoglutarate/Fe(II)-dependent oxygenases that hydroxylates JA to 12-OH-JA.;Encodes a protein with similarity to flavonol synthases that is involved in the d…
TraesCS1A02G070400	C1	78.4812	19.2443	10.3942	17.672	14.9649	NA	NA	NA
TraesCS1A02G070600	C1	21.3295	4.48323	2.39293	2.47744	2.75308	NA	NA	NA
TraesCS1A02G071700	C1	6.0791	3.45293	3.38027	3.31347	3.77826	AT1G06820	CRTISO	Encodes carotenoid isomerase. Catalyzes the isomerization of poly-cis-carotenoids to all-trans-carotenoids. Together with PDS and ZDS, CRTiso is required to complete the synthesis of lycopene from phytoene.
TraesCS1A02G072600	C1	63.5049	20.7113	22.1643	27.5317	27.6257	AT3G62420	BZIP53	Encodes a group-S bZIP transcription factor. Forms heterodimers with group-C bZIP transcription factors. The heterodimers bind to the ACTCAT cis-element of proline dehydrogenase gene.
TraesCS1A02G075000	C1	4.59101	0.482906	0.474095	0.539406	0.413164	AT2G47240;AT2G47245	LACS1;AT2G47245	Encodes an acyl-CoA synthetase that acts on long-chain and very-long-chain fatty acids, involved in cuticular wax and cutin biosynthesis The mRNA is cell-to-cell mobile.;long chain acyl-CoA synthetase;(source:Araport11)
TraesCS1A02G076200	C1	1.48825	0.372345	0.322233	0.448164	0.510171	AT2G47190;AT3G06490;AT5G49620	ATMYB2;MYB108;AtMYB78	Encodes a MYB transcription factor that possesses an R2R3 MYB DNA binding domain and is known to regulate the expression of salt- and dehydration-responsive genes. Has been shown to bind calmodulin.;Encodes a MYB transcription factor involved in regulating anther dehiscence as well as regulating cell death, and cuticle-related Botrytis immunity.;Member of the R2R3 factor gene family.
TraesCS1A02G076900	C1	9.39456	4.77894	0.755566	5.14309	6.18993	NA	NA	NA
TraesCS1A02G077500	C1	17.9744	11.8574	10.9064	11.0748	12.2179	AT1G48040;AT3G17250;AT3G62260	AT1G48040;AT3G17250;AT3G62260	Protein phosphatase 2C family protein;(source:Araport11);Protein phosphatase 2C family protein;(source:Araport11);Type 2C protein phosphatase (PP2C) which negatively regulates AtHKT1;1 activity and thus determines systemic Na+ allocation during salt stress.
TraesCS1A02G078100	C1	4.66777	0.982902	0.0575605	1.01248	1.26858	NA	NA	NA
TraesCS1A02G078800	C1	88.5885	78.5329	15.144	19.0692	14.4111	AT3G03190;AT5G17220	GSTF11;GSTF12	Encodes glutathione transferase belonging to the phi class of GSTs. Naming convention according to Wagner et al. (2002).;Encodes glutathione transferase belonging to the phi class of GSTs. Naming convention according to Wagner et al. (2002). Mutants display no pigments on leaves and stems. Likely to function as a carrier to transport anthocyanin from the cytosol to tonoplasts.
TraesCS1A02G079700	C1	25.0956	19.1406	15.9887	17.6758	13.76	AT1G48210;AT1G48220;AT2G47060;AT3G17410;AT3G62220	AT1G48210;AT1G48220;AT2G47060;AT3G17410;AT3G62220	Protein kinase superfamily protein;(source:Araport11);Protein kinase superfamily protein;(source:Araport11);Encodes Pto-interacting 1-4 (PTI1-4), a member of the PTI1-like serine/threonine protein kinases that share strong sequence identity to the tomato PTI1 kinase.;Positively regulates ABA-mediated physiological responses via phosphorylation on RCAR3/ RCAR11.;Protein kinase superfamily protein;…
TraesCS1A02G083000	C1	3.83375	0.692671	0.464254	0.82212	1.94214	AT2G43010;AT3G59060	PIF4;PIF5	Isolated as a semidominant mutation defective in red -light responses. Encodes a nuclear localized bHLH protein that interacts with active PhyB protein. Negatively regulates phyB mediated red light responses. Involved in shade avoidance response. Protein abundance is negatively regulated by PhyB.Involved in the regulation of response to nutrient levels. Controls the resistance to B. cinerea in a …
TraesCS1A02G083800	C1	74.9137	3.28173	1.17873	0.0189222	0.058814	AT1G54870;AT3G05260	AT1G54870;AT3G05260	ChlADR is an aldehyde reductase that catalyzes the reduction of the aldehyde carbonyl groups on saturated and alpha,beta-unsaturated aldehydes with more than 5 carbons in vitro. The N-terminal region of this protein directs GFP to the chloroplast where where ChlADR likely helps to maintain the photosynthetic process by detoxifying reactive carbonyls formed during lipid peroxidation. In addition, …
TraesCS1A02G084500	C1	5.72107	2.00407	1.02487	2.16151	0.608652	AT1G08940;AT3G05170	AT1G08940;AT3G05170	Phosphoglycerate mutase family protein;(source:Araport11);Phosphoglycerate mutase family protein;(source:Araport11)
TraesCS1A02G086200	C1	5.67203	2.32133	1.68131	2.55585	2.764	NA	NA	NA
TraesCS1A02G086800	C1	8.79869	8.58136	7.53575	8.14372	6.29074	AT4G03020	AT4G03020	transducin family protein / WD-40 repeat family protein;(source:Araport11)
TraesCS1A02G087200	C1	0.11616	0.0674973	0	0.0451986	0.0626605	AT2G47680	AT2G47680	zinc finger (CCCH type) helicase family protein;(source:Araport11)
TraesCS1A02G089600	C1	11.5572	6.52773	1.52827	0.737523	0.813376	NA	NA	NA
TraesCS1A02G091500	C1	1.50034	1.41531	1.12624	0.883404	0.468694	AT1G11720	ATSS3	Encodes a starch synthase that in addition to its role in starch biosynthesis also has a negative regulatory function in the biosynthesis of transient starch. The protein apparently contains a starch-binding domain (SBD).
TraesCS1A02G092300	C1	0.45621	0.0669462	0.0231873	0	0.0685582	NA	NA	NA
TraesCS1A02G093000	C1	54.8394	50.4843	50.1333	23.5585	12.7123	AT2G47770	TSPO	Encodes a membrane-bound protein designated AtTSPO (Arabidopsis thaliana TSPO-related). AtTSPO is related to the bacterial outer membrane tryptophan-rich sensory protein (TspO) and the mammalian mitochondrial 18 kDa Translocator Protein (18 kDa TSPO), members of the TspO/MBR domain-containing membrane proteins. Mainly detected in dry seeds, but can be induced in vegetative tissues by osmotic or s…
TraesCS1A02G093800	C1	478.863	70.1532	38.9691	49.9272	52.1554	NA	NA	NA
TraesCS1A02G095500	C1	13.9722	9.29831	9.62033	9.49811	9.08928	AT1G64040	TOPP3	Encodes the catalytic subunit of a Type 1 phosphoprotein Ser/Thr phosphatase, expressed in roots, shoots and flowers.
TraesCS1A02G097000	C1	0.410929	0.359232	0	0.261507	0.0799964	NA	NA	NA
TraesCS1A02G099000	C1	37.7061	7.87302	6.21053	9.76136	7.29043	AT1G52870;AT4G03410	AT1G52870;AT4G03410	Peroxisomal membrane 22 kDa (Mpv17/PMP22) family protein;(source:Araport11);Peroxisomal membrane 22 kDa (Mpv17/PMP22) family protein;(source:Araport11)
TraesCS1A02G099500	C1	39.8946	23.6537	23.1336	19.0442	14.0201	AT3G16950;AT4G16155	LPD1;LPD2	encodes a plastid lipoamide dehydrogenase, subunit of the pyruvate dehydrogenase complex which provides acetyl-CoA for de novo fatty acid biosynthesis. The gene is highly expressed in developing seeds.;dihydrolipoamide dehydrogenase;(source:Araport11)
TraesCS1A02G100100	C1	0.676624	0.4825	0	0.113935	0.0513414	AT3G23570;AT3G23600	AT3G23570;AT3G23600	alpha/beta-Hydrolases superfamily protein;(source:Araport11);alpha/beta-Hydrolases superfamily protein;(source:Araport11)
TraesCS1A02G100600	C1	2.20319	1.23984	1.99784	1.51506	1.19374	AT2G47940	DEGP2	Encodes DegP2 protease (DEGP2); nuclear gene for chloroplast product.
TraesCS1A02G104300	C1	0.150968	0	0	0	0	AT5G19880	PER58	Peroxidase superfamily protein;(source:Araport11)
TraesCS1A02G104500	C1	63.934	11.6391	14.6003	5.73137	10.3788	NA	NA	NA
TraesCS1A02G105300	C1	1.11074	0.349868	0.450808	0.913216	0.835114	AT3G17470	ATCRSH	CRSH-dependent ppGpp synthesis causes transient increase of intracellular ppGpp at night.
TraesCS1A02G107000	C1	0.228482	0.00791568	0.0182381	0.0370641	0.00873335	NA	NA	NA
TraesCS1A02G107200	C1	2.61723	0	0	0	0.0309356	NA	NA	NA
TraesCS1A02G107700	C1	56.712	0.862236	0.684331	0.317652	0.922582	NA	NA	NA
TraesCS1A02G108100	C1	7.5235	6.41832	3.53164	4.1367	3.9448	AT2G39360;AT3G46290;AT5G59700	AT2G39360;HERK1;AT5G59700	Protein kinase superfamily protein;(source:Araport11);Encodes HERCULES1 (HERK1), a receptor kinase regulated by Brassinosteroids and required for cell elongation during vegetative growth.;Protein kinase superfamily protein;(source:Araport11)
TraesCS1A02G110000	C1	2.10381	0.0249076	0.151437	0.469888	0.42067	AT2G05940;AT5G35580	RIPK;AT5G35580	Encodes a receptor-like cytoplasmic kinase that phosphorylates the host target RIN4, leading to the activation of a plant innate immune receptor RPM1.;Protein kinase superfamily protein;(source:Araport11)
TraesCS1A02G113100	C1	11.7531	1.45364	2.75211	1.30266	1.2942	NA	NA	NA
TraesCS1A02G113600	C1	0.67579	0.0991872	0.0207118	0.0240934	0	AT1G23320;AT1G70560;AT4G24670	TAR1;TAA1;TAR2	Encodes a protein with similarity to the TAA1 trytophan aminotransferase involved in IAA biosynthesis. This gene appears to be expressed at a very low level during seedling development. Triple mutant analyses implicate this gene in embryonic development.;TAA1 is involved in the shade-induced production of indole-3-pyruvate (IPA), a precursor to IAA, a biologically active auxin. It is also involve…
TraesCS1A02G115400	C1	40.0687	8.49094	6.68029	7.91461	6.49017	NA	NA	NA
TraesCS1A02G116700	C1	376.011	28.5498	59.0094	80.188	101.146	NA	NA	NA
TraesCS1A02G116800	C1	2.71325	0.498725	0.856431	0.44876	0.990108	NA	NA	NA
TraesCS1A02G116900	C1	194.913	5.13619	3.73091	7.61104	10.2913	NA	NA	NA
TraesCS1A02G117000	C1	4.37908	0.741491	1.04363	1.81446	4.00522	NA	NA	NA
TraesCS1A02G117300	C1	2.03403	1.07963	0.744916	0.658065	0.892917	AT2G22740;AT2G35160	SUVH6;SUVH5	Encodes a SU(VAR)3-9 homolog, a methyltransferase involved in histone methylation. The protein was shown to bind to methylated cytosines of CG, CNG and CNN motifs but has a preference for the latter two. This is a member of a subfamily of SET proteins that shares a conserved SRA domain.;Encodes SU(var)3-9 homologue 5 (SUVH5). SUVH5 has histone methyltransferase (MTase) activity in vitro and contr…
TraesCS1A02G117400	C1	103.017	1.08863	2.95909	3.1784	5.53503	NA	NA	NA
TraesCS1A02G117500	C1	1.28196	0.287206	0.722474	0.358578	0.709001	AT1G15460;AT1G74810;AT4G32510;AT5G25430	BOR4;BOR5;AT4G32510;BOR6	Encodes a efflux-type boron transporter. Over-expression improved plant growth under B toxic conditions.;HCO3- transporter family;(source:Araport11);HCO3- transporter family;(source:Araport11);HCO3- transporter family;(source:Araport11)
TraesCS1A02G117800	C1	0.733771	0	0	0	0	AT1G05100;AT2G32510;AT4G26890;AT5G55090	MAPKKK18;MAPKKK17;MAPKKK16;MAPKKK15	member of MEKK subfamily. Negatively regulated by RGLG1 and RGLG2; involved in drought stress tolerance.;Member of MEKK subfamily involved in wound and JA induced signaling.Interacts with At5g40440, and activates At1g59580.;Member of MEKK subfamily. Involved in wound response signaling. Interacts with At5g40440, and activates At1g59580.;member of MEKK subfamily
TraesCS1A02G117900	C1	2.00906	0	0	0	0	NA	NA	NA
TraesCS1A02G119400	C1	43.7612	0.0573889	0	0	0	AT3G24420	AT3G24420	DLK2 is a divergent member of the DWARF14 family. It's expression is dependent on D14 and KAI2 but it does not appear to play a role in stringolactone metabolism.
TraesCS1A02G120100	C1	164.7	52.6148	37.6481	58.1647	58.9673	AT1G79920;AT1G79930	AT1G79920;HSP70-14	Heat shock protein 70 (Hsp 70) family protein;(source:Araport11);encodes high molecular weight heat shock protein 70 not a HSP90 homolog, mRNA is constitutively expressed but transiently induced after heat shock
TraesCS1A02G120200	C1	96.4749	69.7563	81.3699	75.2836	66.3959	AT1G79920;AT1G79930	AT1G79920;HSP70-14	Heat shock protein 70 (Hsp 70) family protein;(source:Araport11);encodes high molecular weight heat shock protein 70 not a HSP90 homolog, mRNA is constitutively expressed but transiently induced after heat shock
TraesCS1A02G121400	C1	8.23309	4.79778	5.46039	6.91089	6.26435	NA	NA	NA
TraesCS1A02G121500	C1	0.973528	0.612352	0	0.62827	0.58638	AT5G26170	WRKY50	member of WRKY Transcription Factor; Group II-c. Involved in jasmonic acid inducible defense responses.
TraesCS1A02G121800	C1	143.943	0.798186	1.79172	1.86476	4.85328	NA	NA	NA
TraesCS1A02G122500	C1	55.496	29.2352	38.3644	42.5817	32.0918	AT5G11670;AT5G25880	NADP-ME2;NADP-ME3	The malic enzyme (EC 1.1.1.40) encoded by AtNADP-ME2 is presumably a cytosolic enzyme involved in malate metabolism and possibly assisting the oxidative pentose phosphate pathway. AtNADP-ME2 counts for the major part of NADP-ME activity in mature tissues of Arabidopsis.;The malic enzyme (EC 1.1.1.40) encoded by the ATNADP-ME3 is presumably cytosolic and restricted in its expression by both develo…
TraesCS1A02G122800	C1	16.3231	3.00473	1.69544	2.98459	3.03947	AT2G19860;AT4G29130	HXK2;HXK1	Encodes a protein with hexokinase activity (AtHXK2) and acts as a sensor for plant sugar responses.;Encodes a hexokinase (HXK1) in the plant glucose-signaling network. Functions as a glucose sensor to interrelate nutrient, light, and hormone signaling networks for controlling growth and development in response to the changing environment.
TraesCS1A02G123000	C1	17.7613	15.6735	13.9718	17.801	12.5768	AT4G29330	DER1	DERLIN-1;(source:Araport11)
TraesCS1A02G123100	C1	18.8843	16.192	9.31209	12.121	10.3877	NA	NA	NA
TraesCS1A02G123900	C1	7.9019	4.82614	3.19243	4.12933	3.71162	AT2G25760	AT2G25760	Casein kinase involved in phosphorylation and ubiquination of RYR/PYLs, resulting in negative regulation of ABA response. Plays a role in repressing the transition from vegetative to reproductive phase.
TraesCS1A02G125700	C1	21.3393	11.8937	7.71596	14.8465	10.2234	AT1G17620;AT5G11890	AT1G17620;AT5G11890	Late embryogenesis abundant (LEA) hydroxyproline-rich glycoprotein family;(source:Araport11);harpin-induced protein;(source:Araport11)
TraesCS1A02G126200	C1	0.348477	0	0	0.0393224	0.081323	AT2G42360	ATL41	RING/U-box superfamily protein;(source:Araport11)
TraesCS1A02G127900	C1	13.4956	8.03568	11.5639	12.0275	10.6452	AT1G52290;AT3G24540;AT3G24550	PERK15;AT3G24540;PERK1	Encodes a member of the proline-rich extensin-like receptor kinase (PERK) family. This family consists of 15 predicted receptor kinases (PMID: 15653807).;Encodes a member of the proline-rich extensin-like receptor kinase (PERK) family. This family consists of 15 predicted receptor kinases (PMID: 15653807).;Encodes a member of the proline-rich extensin-like receptor kinase (PERK) family. This fami…
TraesCS1A02G129500	C1	19.138	11.8173	9.30025	8.73591	9.82829	AT1G53023;AT1G53025;AT3G15355	UBC39;AT1G53025;UBC25	Ubiquitin-conjugating enzyme family protein;(source:Araport11);Ubiquitin-conjugating enzyme family protein;(source:Araport11);ubiquitin-conjugating enzyme 25;(source:Araport11)
TraesCS1A02G129700	C1	0.886738	0.302953	0.105388	0.0744758	0.0979692	NA	NA	NA
TraesCS1A02G130900	C1	3.87853	1.89105	2.5434	3.36296	3.37039	NA	NA	NA
TraesCS1A02G131500	C1	31.8072	28.6724	31.766	25.2648	23.822	AT4G39990;AT5G65270	RABA4B;RABA4A	Rab GTPase that selectively marks cell wall-containing TGN compartments. Involved in protein trafficking to membranes during tip growth.;RAB GTPase homolog A4A;(source:Araport11)
TraesCS1A02G132400	C1	286.1	150.537	281.041	224.831	181.539	AT2G38810;AT3G54560;AT4G13570	HTA8;H2AV;HTA4	Encodes HTA8, a histone H2A protein. Loss of all H2A.Z (triple mutant with HTA9 and HTA11) results in a reduction in DNA methylation of transposons but not that of genes. Loss of H2A.Z causes misregulation of many genes involved in the response to developmental and environmental cues, and that these genes tend to have high levels of gene-body H2A.Z.;Encodes HTA11, a histone H2A protein. Loss of a…
TraesCS1A02G133100	C1	114.733	18.0516	17.9904	20.1491	20.7539	AT4G24280;AT5G49910	HSP70-6;HSP70-7	Involved in protein import into chloroplasts during early developmental stages. The mRNA is cell-to-cell mobile.;Stromal heat shock protein involved in protein import into chloroplast. The mRNA is cell-to-cell mobile.
TraesCS1A02G139900	C1	283.647	104.552	36.0272	40.5867	43.4189	AT2G36950;AT5G03380	HIPP05;HIPP06	Heavy metal transport/detoxification superfamily protein;(source:Araport11);Heavy metal transport/detoxification superfamily protein;(source:Araport11)
TraesCS1A02G141000	C1	7.28352	1.25105	2.0909	2.1063	2.66499	NA	NA	NA
TraesCS1A02G141900	C1	36.71	2.79321	7.24166	11.5047	10.4536	AT3G47160;AT5G01520;AT5G58787	AT3G47160;AIRP2;AT5G58787	RING/U-box superfamily protein;(source:Araport11);Encodes a cytosolic RING-type E3 ubiquitin (Ub) ligase that is critical for ABA and high salinity responses during germination. AtAIRP2 and SDIR1 likely play a combinatory role in ABA signaling and the response to high salt in Arabidopsis.;Encodes a cytosolic protein with E3 ligase activity that is involved in positive regulation of ABA responses.
TraesCS1A02G143300	C1	5.541	1.66042	0.866738	2.18093	1.38515	AT5G22920	RZPF34	Encodes a protein with sequence similarity to RING, zinc finger proteins. Loss of function mutations show reduced (15%) stomatal aperture under non stress conditions.
TraesCS1A02G143900	C1	57.701	12.2533	10.5563	11.642	7.40688	AT5G48880	KAT5	Encodes a peroxisomal 3-keto-acyl-CoA thiolase 2 precursor. EC2.3.1.16 thiolases. AT5G48880.1 is named PKT1 and AT5G48880.2 is named PKT2.
TraesCS1A02G144000	C1	4.0439	2.5691	3.21905	3.4175	3.29715	AT1G08600	ATRX	The Arabidopsis ATRX harbours a N-terminal ADD domain and a C-terminal helicase domain and is devoid of the large central region involved in DAXX interaction in mammals. Arabidopsis ATRX mutant alleles are viable, but with reduced fertility. Their combination with mutants for the H3.3 chaperone HIRA impairs plant survival. ATRX loss affects cellular histone H3.3 pools and modulates the H3.1/H3.3 …
TraesCS1A02G144200	C1	0.136739	0	0.0178802	0.0283835	0	NA	NA	NA
TraesCS1A02G144400	C1	0.212749	0.112036	0	0	0.114491	AT3G51080;AT4G36240;AT5G66320	GATA6;GATA7;GATA5	Encodes a member of the GATA factor family of zinc finger transcription factors.;Encodes a member of the GATA factor family of zinc finger transcription factors.;Encodes GATA transcription factor gene GNC, involved in regulating carbon and nitrogen metabolism. Expression occurs in aerial tissue at an early stage of development and is inducible by nitrate.
TraesCS1A02G144700	C1	4.54037	0.764416	1.45071	2.08581	2.83061	NA	NA	NA
TraesCS1A02G147400	C1	4.30462	0.248457	0.424232	0.455481	0.250862	AT4G28706;AT5G43910	AT4G28706;AT5G43910	pfkB-like carbohydrate kinase family protein;(source:Araport11);pfkB-like carbohydrate kinase family protein;(source:Araport11)
TraesCS1A02G149500	C1	0.0616505	0.00730074	0	0.0326264	0.00803149	NA	NA	NA
TraesCS1A02G149700	C1	21.027	4.89582	7.23065	7.4767	6.65136	NA	NA	NA
TraesCS1A02G150100	C1	14.5544	8.61122	3.05805	3.8521	3.9173	NA	NA	NA
TraesCS1A02G150900	C1	0.295576	0.0117264	0	0	0.0129001	AT1G02190;AT1G02205;AT2G37700	AT1G02190;CER1;AT2G37700	Fatty acid hydroxylase superfamily;(source:Araport11);Expression of the CER1 gene associated with production of stem epicuticular wax and pollen fertility. Biochemical studies showed that cer1 mutants are blocked in the conversion of stem wax C30 aldehydes to C29 alkanes, and they also lack the secondary alcohols and ketones. These suggested the CER1 protein is an aldehyde decarbonylase, but the …
TraesCS1A02G151000	C1	12.4639	9.59042	9.7979	8.24404	5.13581	AT3G23490	CYN	Encodes a cyanase that catalyzes the bicarbonate-dependent breakdown of cyanate to ammonia and bicarbonate. CYN forms a hexadecamer and is believed to be a cytosolic protein. Long-term exposure to NaCl increases CYN transcript levels. It is also expressed at higher levels in flowers relative to stems, roots, and seedlings.
TraesCS1A02G151700	C1	1.30318	0.813942	0.473865	1.21299	1.08007	NA	NA	NA
TraesCS1A02G152100	C1	1.6587	0.0435188	0.178669	0.301136	0.507301	AT1G07720;AT2G28630;AT5G04530	KCS3;KCS12;KCS19	Encodes KCS3, a member of the 3-ketoacyl-CoA synthase family involved in the biosynthesis of VLCFA (very long chain fatty acids).;Encodes KCS12, a member of the 3-ketoacyl-CoA synthase family involved in the biosynthesis of VLCFA (very long chain fatty acids).;Encodes KCS19, a member of the 3-ketoacyl-CoA synthase family involved in the biosynthesis of VLCFA (very long chain fatty acids).
TraesCS1A02G152300	C1	0.961357	0.110321	0.0898325	0.158631	0.122424	NA	NA	NA
TraesCS1A02G153100	C1	6.86815	2.74194	2.15034	3.89178	3.70182	AT1G03990;AT3G23410;AT4G28570	FAO1;FAO3;FAO4B	Long-chain fatty alcohol dehydrogenase family protein;(source:Araport11);Encodes a fatty alcohol oxidase.;Long-chain fatty alcohol dehydrogenase family protein;(source:Araport11)
TraesCS1A02G153600	C1	4.636	2.80145	2.47696	4.00895	3.18192	AT1G03950	VPS2.3	vacuolar protein sorting-associated protein 2.3;(source:Araport11)
TraesCS1A02G154500	C1	1.69454	0.961949	1.35798	1.48448	1.2307	NA	NA	NA
TraesCS1A02G154900	C1	4.2644	0.668087	0.0420531	1.14259	0.555815	AT2G31160	LSH3	LIGHT-DEPENDENT SHORT HYPOCOTYLS-like protein (DUF640);(source:Araport11)
TraesCS1A02G159400	C1	6.07247	2.32939	2.26333	2.74835	2.68987	NA	NA	NA
TraesCS1A02G160700	C1	5.86987	5.46575	4.06995	5.93651	5.54464	NA	NA	NA
TraesCS1A02G161900	C1	122.205	35.535	16.2731	19.2042	15.0255	AT5G08290	YLS8	Encodes Dim1 homolog.
TraesCS1A02G162800	C1	6.46521	3.09778	5.03686	4.72488	4.36221	AT1G50360;AT3G19960	VIII-A;ATM1	member of Myosin-like proteins;member of Myosin-like proteins
TraesCS1A02G164000	C1	22.0987	15.6432	13.0533	15.5918	13.6745	AT1G15130	BRO1	ALIX mediates endosomal protein trafficking and turnover through the ESCRT/MVB pathway. One target is the phosphate transporter PHT1;1. Modulates ABA-mediated inhibition of plant growth and stomatal aperture (PMID:31363038).
TraesCS1A02G164700	C1	3.20678	1.91405	1.50214	1.56176	2.18645	AT3G02690	AT3G02690	Nucleotide/sugar transporter family protein
TraesCS1A02G165300	C1	11.4021	8.54057	6.67181	7.43265	6.16309	NA	NA	NA
TraesCS1A02G165400	C1	190.609	10.61	15.4753	1.29255	0.872366	AT1G17810;AT1G73190	TIP3-2;TIP3-1	beta-tonoplast intrinsic protein (beta-TIP) mRNA, complete;Moves to the Protein Storage Vacuole in a Golgi independent manner
TraesCS1A02G165600	C1	0.131418	0.140526	0	0.0257424	0.0984155	NA	NA	NA
TraesCS1A02G165700	C1	0.824859	0.196728	0.217125	0.141543	0.22338	NA	NA	NA
TraesCS1A02G167100	C1	85.5819	13.131	5.81618	3.73448	3.63273	AT1G54540;AT1G65690;AT5G36970	AT1G54540;NHL6;NHL25	Late embryogenesis abundant (LEA) hydroxyproline-rich glycoprotein family;(source:Araport11);Encodes NHL6 (NDR1/HIN1-like 6). Plays an important role in the abiotic stresses-induced ABA signaling and biosynthesis, particularly during seed germination and early seedling development.;NDR1/HIN1-like protein, expression induced during incompatible response to a pathogen, expression is at least partly…
TraesCS1A02G168600	C1	79.608	15.3262	14.6883	28.9751	15.5382	AT2G23790;AT4G36820;AT5G42610;AT5G66650	AT2G23790;AT4G36820;AT5G42610;AT5G66650	calcium uniporter (DUF607);(source:Araport11);Mitochondrial calcium channel.;calcium uniporter (DUF607);(source:Araport11);Chloroplast localized mitochondrial calcium uniporter.
TraesCS1A02G169300	C1	10.5137	7.13037	6.33341	5.61311	6.65319	NA	NA	NA
TraesCS1A02G170000	C1	42.6625	37.8284	18.368	12.9328	10.8585	AT4G27460;AT5G53750	CBSX5;AT5G53750	Cystathionine beta-synthase (CBS) family protein;(source:Araport11);CBS domain-containing protein;(source:Araport11)
TraesCS1A02G170700	C1	0.580073	0	0	0.0265232	0	AT2G26740;AT2G26750	ATSEH;AT2G26750	Encodes a soluble epoxide hydrolase whose expression is induced by auxin and water stress.;alpha/beta-Hydrolases superfamily protein;(source:Araport11)
TraesCS1A02G170800	C1	7.20366	4.13362	5.65515	3.75454	4.26744	AT1G52920;AT2G20770	GCR2;GCL2	Encodes a plasma membrane閳ユ悋ocalized ABA receptor, which interacts with the G&#945;&#946;&#947; complex. It has been postulated that the binding of ABA to GCR2 results in the release of the G protein and dissociation of the heterotrimeric complex into G&#945; and the G&#946;&#947; dimer to activate downstream ABA effectors and to trigger the ABA responses.;Encodes a protein with reported similari…
TraesCS1A02G171000	C1	23.3742	1.43867	0.2711	0.143809	0.404145	AT4G27440;AT5G54190	PORB;PORA	light-dependent NADPH:protochlorophyllide oxidoreductase B The mRNA is cell-to-cell mobile.;light-dependent NADPH:protochlorophyllide oxidoreductase A
TraesCS1A02G171100	C1	10.6378	6.49713	9.01312	9.50428	7.97724	AT1G11060;AT1G61030	AT1G11060;AT1G61030	Encodes one of two redundant proteins (the other is WAPL2) that are involved in prophase removal of cohesion during meiosis. Double mutants with wapl2 exhibit reduced fertility due to defects in meiosis and also some abnormal embryo development in rare cases where embryos are formed.;Encodes one of two redundant proteins (the other is WAPL1) that are involved in prophase removal of cohesion durin…
TraesCS1A02G172700	C1	0.515637	0.280045	0.0857606	0.158067	0.315266	AT5G53490	AT5G53490	thylakoid lumenal 17.4 kDa protein, chloroplast, identical to SP:P81760 Thylakoid lumenal 17.4 kDa protein, chloroplast precursor (P17.4) {Arabidopsis thaliana}. Putative pentapeptide protein.
TraesCS1A02G173500	C1	4.86814	3.28229	3.61619	4.84082	3.67588	AT3G48880	AT3G48880	Encodes an F-box protein, SNIPER4, that regulates the turnover of MUSE13 and MUSE14, redundant TRAF proteins serving as adaptors in the SCFCRP1 complex to facilitate the turnover of nucleotide-binding domain and leucine-rich repeats (NLR) immune receptors.
TraesCS1A02G174800	C1	73.565	6.3592	19.3103	7.91971	3.58852	NA	NA	NA
TraesCS1A02G175500	C1	112.562	71.0531	109.417	33.1267	11.6611	NA	NA	NA
TraesCS1A02G176000	C1	4.70568	2.53133	3.26129	1.952	1.68469	NA	NA	NA
TraesCS1A02G176800	C1	32.9798	4.36534	3.9506	3.33235	2.95336	NA	NA	NA
TraesCS1A02G177300	C1	63.7495	35.3006	14.4281	25.9569	28.0249	AT1G64900;AT1G64930;AT1G64940;AT1G64950;AT2G12190;AT3G03470;AT5G61320	CYP89A2;CYP89A7;CYP89A6;CYP89A5;AT2G12190;CYP89A9;CYP89A3	Encodes cytochrome P450 (CYP89A2). The mRNA is cell-to-cell mobile.;member of CYP89A;member of CYP89A;member of CYP89A The mRNA is cell-to-cell mobile.;Cytochrome P450 superfamily protein;(source:Araport11);P450 monooxygenase CYP89A9. Involved in NDCC accumulation during Arabidopsis leaf senescence.;member of CYP89A
TraesCS1A02G180800	C1	1.70911	0.356679	0.418204	0.619965	0.343566	AT5G53580	PLR1	NAD(P)-linked oxidoreductase superfamily protein;(source:Araport11)
TraesCS1A02G181000	C1	50.9551	14.4743	11.7584	4.97006	7.99962	AT1G64660	MGL	Encodes a functional methionine gamma-lyase, a cytosolic enzyme catalyzes the degradation of methionine into methanethiol, alpha-ketobutyrate and ammonia. The catabolism of excess methionine is important to methionine homeostasis. The mRNA is cell-to-cell mobile.
TraesCS1A02G181900	C1	18.3173	10.9651	11.8917	15.1417	10.0847	AT4G24100	AT4G24100	Protein kinase superfamily protein
TraesCS1A02G182300	C1	13.172	1.80853	1.09245	1.38564	1.84543	AT2G46620	AT2G46620	P-loop containing nucleoside triphosphate hydrolases superfamily protein;(source:Araport11)
TraesCS1A02G182600	C1	9.87529	1.49717	1.57399	3.47076	3.57589	NA	NA	NA
TraesCS1A02G185800	C1	0.454988	0.0290589	0.0838004	0.327276	0.348802	AT1G64670;AT4G24140;AT5G41900	BDG1;BDG3;BDG2	Encodes a epidermally expressed extracellular protein that likely functions as an alpha-beta hydrolase and is required for normal cuticle formation. Homozygous mutant plants are dwarfed and have abnormal leaves, collapsed cells, reduced numbers of trichomes. The specific role of BDG is unclear: it may function in cutin biosynthesis or as a cross-linking enzyme in the cell wall itself.;alpha/beta-…
TraesCS1A02G187100	C1	2.29836	1.24757	1.25248	0.626981	0.206719	NA	NA	NA
TraesCS1A02G187300	C1	43.6426	7.3211	4.48175	4.09138	6.46551	NA	NA	NA
TraesCS1A02G187700	C1	0.844612	0.24394	0.349582	0.18134	0	NA	NA	NA
TraesCS1A02G188400	C1	4.42802	2.29346	2.25547	5.27125	3.01543	NA	NA	NA
TraesCS1A02G188700	C1	76.138	19.2721	18.6848	17.9851	21.4431	AT3G61060	AtPP2-A13	phloem protein 2-A13;(source:Araport11)
TraesCS1A02G188900	C1	29.768	5.52926	3.62738	2.51657	2.68135	AT5G07250	RBL3	RHOMBOID-like protein 3;(source:Araport11)
TraesCS1A02G189200	C1	3.07539	1.42736	0	0.0773957	0.0926503	NA	NA	NA
TraesCS1A02G189300	C1	28.2416	2.74684	0.309945	0.60966	0.519577	NA	NA	NA
TraesCS1A02G190700	C1	12.8847	5.63537	7.40307	10.7887	9.31182	NA	NA	NA
TraesCS1A02G192800	C1	49.2103	3.30818	2.30843	5.6401	5.22774	AT1G32700;AT4G17900;AT5G46710	AT1G32700;AT4G17900;AT5G46710	PLATZ transcription factor family protein;(source:Araport11);PLATZ transcription factor family protein;(source:Araport11);PLATZ transcription factor family protein;(source:Araport11)
TraesCS1A02G193200	C1	92.8292	10.5807	10.19	18.3605	22.1181	AT1G32640;AT4G17880;AT5G46760;AT5G46830	MYC2;MYC4;MYC3;BHLH28	Encodes a MYC-related transcriptional activator with a typical DNA binding domain of a basic helix-loop-helix leucine zipper motif. Binds to an extended G-Box promoter motif and interacts with Jasmonate ZIM-domain proteins. MYC2 interacts with EIN3 and EIL1 to repress hook curvature and resistance to Botrytis cinera.Its transcription is induced by dehydration stress, ABA treatment and blue light …
TraesCS1A02G193800	C1	4.77082	1.64893	3.15379	2.85252	1.36733	NA	NA	NA
TraesCS1A02G194200	C1	246.478	67.6388	115.75	175.993	152.691	AT4G17940	AT4G17940	Tetratricopeptide repeat (TPR)-like superfamily protein;(source:Araport11)
TraesCS1A02G194900	C1	16.2345	7.22421	3.21824	8.74392	7.7248	NA	NA	NA
TraesCS1A02G195500	C1	4.18529	1.12422	1.5164	2.38187	2.08119	AT2G35500	SKL2	Encodes a protein with some sequence similarity to shikimate kinases, but a truncated form of this protein (lacking a putative N-terminal chloroplast transit peptide) does not have shikimate kinase activity in vitro.
TraesCS1A02G195700	C1	46.8682	4.98889	6.79587	9.31008	5.77953	NA	NA	NA
TraesCS1A02G196800	C1	19.8848	8.27135	9.91043	11.2987	5.75057	AT1G32090	AT1G32090	early-responsive to dehydration stress protein (ERD4);(source:Araport11)
TraesCS1A02G197100	C1	5.4994	0.0999046	0.0549759	0.0881308	0.0653102	AT1G19630	CYP722A1	cytochrome P450, family 722, subfamily A, polypeptide 1;(source:Araport11)
TraesCS1A02G197200	C1	11.9786	5.38859	2.64016	3.22482	1.11154	AT3G03090;AT5G17010	AtVGT1;AT5G17010	Encodes a vacuolar membrane-localized glucose transporter that can also transport fructose. Mutations in these gene have effects on seed germination and time to flowering.;Major facilitator superfamily protein;(source:Araport11)
TraesCS1A02G198500	C1	24.667	12.7941	5.7124	9.56756	6.90708	AT4G25030;AT5G45410	AT4G25030;AT5G45410	Plastid localized protein of unknown function. Mutants are more susceptible to P. syringae and produce less callose upon infection.;Plastid localized protein of unknown function. Mutants are more susceptible to P. syringae and produce less callose upon infection.
TraesCS1A02G200000	C1	0.302854	0.0270702	0	0.0345774	0	NA	NA	NA
TraesCS1A02G200800	C1	13.8813	11.2053	8.99278	11.0304	9.67388	AT1G14530;AT2G02180	THH1;TOM3	tobamovirus multiplication-like protein (DUF1084);(source:Araport11);Necessary for the efficient multiplication of tobamoviruses. The mRNA is cell-to-cell mobile.
TraesCS1A02G201300	C1	185.734	55.9418	110.955	92.6177	106.819	NA	NA	NA
TraesCS1A02G201400	C1	1.02818	0	0.0131697	0.0131438	0.082406	NA	NA	NA
TraesCS1A02G201600	C1	25.0663	23.5437	17.8816	15.088	12.8439	AT3G51490;AT4G35300	TMT3;TMT2	tonoplast monosaccharide transporter3;(source:Araport11);tonoplast monosaccharide transporter2;(source:Araport11)
TraesCS1A02G202300	C1	15.9894	11.9968	8.06733	8.78143	8.77118	AT3G51470	AT3G51470	Protein phosphatase 2C family protein;(source:Araport11)
TraesCS1A02G202900	C1	284.999	85.6843	183.559	7.27919	4.85785	NA	NA	NA
TraesCS1A02G203000	C1	35.4209	23.1831	31.3649	31.7949	24.509	AT2G17190;AT2G17200	DSK2A;DSK2B	Encodes a ubiquitin receptor protein that specifically associates with PEX2 and PEX12.;Encodes a ubiquitin receptor protein that specifically associates with PEX2 and PEX12.
TraesCS1A02G203200	C1	21.507	3.99488	3.62241	1.99716	2.6937	AT3G45960;AT3G45970;AT4G38400	EXLA3;EXLA1;EXLA2	member of EXPANSIN-LIKE. Naming convention from the Expansin Working Group (Kende et al, 2004. Plant Mol Bio);member of EXPANSIN-LIKE. Naming convention from the Expansin Working Group (Kende et al, 2004. Plant Mol Bio) The mRNA is cell-to-cell mobile.;member of EXPANSIN-LIKE. Naming convention from the Expansin Working Group (Kende et al, 2004. Plant Mol Bio)
TraesCS1A02G203400	C1	6.05647	5.0413	4.15302	6.07873	5.02154	AT2G17090;AT2G17170;AT4G35230	BSK12;AT2G17170;BSK1	Encodes a N-myrystolylated plasma membrane associated member of the RLCK II family of IRAK/Pelle-like kinases that regulates the MAPK pathway that promotes the elongation of the Arabidopsis zygote and the development of its basal daughter cell into the extra-embryonic suspensor. SSP transcripts are produced in mature pollen but are not translated until delivery to the zygote and the endosperm aft…
TraesCS1A02G205100	C1	29.0307	2.81081	0.694264	3.5973	2.2265	AT2G17730;AT4G35840;AT5G66070	NIP2;AT4G35840;AT5G66070	Intrinsic thylakoid membrane protein that fixes RPOTmp on the stromal side of the thylakoid membrane.;RING/U-box superfamily protein;(source:Araport11);E3 ubiquitin ligase that functions in negative regulation of ABA signaling.
TraesCS1A02G205700	C1	27.6334	23.0002	17.7359	21.1168	22.7472	AT4G12110;AT4G22755;AT4G22756	SMO1-1;SMO1-3;SMO1-2	Encodes a member of the SMO1 family of sterol 4alpha-methyl oxidases. More specifically functions as a 4,4-dimethyl-9beta,19-cyclopropylsterol-4alpha-methyl oxidase. Works together with SMO1-2 to maintain correct sterol composition and balance auxin and cytokinin activities during embryogenesis.;Encodes a member of the SMO1 family of sterol 4alpha-methyl oxidases. In general, the expression of SM…
TraesCS1A02G209100	C1	8.16296	0.281241	0.0284353	3.06633	0.79241	AT3G30775;AT5G38710	POX1;POX2	Encodes a proline oxidase that is predicted to localize to the inner mitochondrial membrane, its mRNA expression induced by high levels of Al and by osmotic stress. The promoter contains an L-proline-inducible element.;Methylenetetrahydrofolate reductase family protein;(source:Araport11)
TraesCS1A02G210000	C1	15.8018	16.4429	2.41369	1.58107	1.57761	AT1G12100	AT1G12100	Bifunctional inhibitor/lipid-transfer protein/seed storage 2S albumin superfamily protein;(source:Araport11)
TraesCS1A02G211100	C1	1.40287	0.734368	0.453708	0.162689	0.316823	NA	NA	NA
TraesCS1A02G211500	C1	13.647	3.80977	0.98864	3.58341	2.62937	AT2G35710;AT4G16600	PGSIP8;PGSIP7	Nucleotide-diphospho-sugar transferases superfamily protein;(source:Araport11);Nucleotide-diphospho-sugar transferases superfamily protein;(source:Araport11)
TraesCS1A02G211800	C1	0.371151	0	0.0320003	0.224915	0.143885	NA	NA	NA
TraesCS1A02G212900	C1	6.05949	1.55796	0.213778	0.681201	0.825671	NA	NA	NA
TraesCS1A02G213000	C1	14.1887	11.5044	8.04418	5.76064	4.2628	AT1G32440	PKP3	encodes a chloroplast pyruvate kinase beta subunit. The enzyme is less active than the other chloroplast pyruvate kinase beta subunit encoded by AT5G52920. Involved in seed oil biosynthesis. Can partially complement the AT5G52920 mutant.
TraesCS1A02G213600	C1	5.01112	0.778651	0.101772	0.32879	0.720945	AT2G38740	SGPP	HAD-type phosphosugar phosphatase.
TraesCS1A02G213900	C1	1.85457	1.10152	0.553175	1.31914	1.03527	AT3G60190	DRP1E	At3g60190 encodes Arabidopsis dynamin-related protein 1E, DRP1E, also known as EDR3, ADL4 and ADL1E, which is 624 amino acid residues long, has a predicted mass of 69.8 kDa and a pI of 7.5. Dynamin-related protein 1E belongs to a plant-specific subclass of dynamin-related proteins (DRP1), consisting of five members in Arabidopsis (A, B, C, D, E). This class is characterized by having an N-termina…
TraesCS1A02G214600	C1	52.5839	36.4009	38.3487	45.7734	35.4663	AT2G44650;AT3G60210	CPN10-2;CPN10-1	Encodes a chloroplast-localized chaperonin 10 whose mRNA is expressed in leaves and stems but not roots.;GroES-like family protein;(source:Araport11)
TraesCS1A02G215500	C1	36.2748	2.9073	4.54246	6.96377	4.03361	AT4G17090	BAM3	Encodes a beta-amylase targeted to the chloroplast. Transgenic BMY8 RNAi lines fail to accumulate maltose during cold shock suggesting that maltose accumulation coincides with BMY8 expression. Apart from maltose, the sugar content of the RNAi lines were similar to wildtype (glucose and sucrose unaffected).BAM3 activity declines 2 and 4 days after start of cold stress despite an increase in transc…
TraesCS1A02G215600	C1	11.2184	10.8994	8.87953	9.41344	7.8702	AT1G02170;AT4G25110	AMC1;AMC2	Encodes a type I metacaspase. Two Arabidopsis metacaspases, AT1G02170 (MC1) and AT4G25110 (MC2) antagonistically control programmed cell death in Arabidopsis. MC1 is a positive regulator of cell death and requires conserved caspase-like putative catalytic residues for its function. MC2 negatively regulates cell death. This function is independent of the putative catalytic residues. A third type I…
TraesCS1A02G215900	C1	5.03182	1.08255	3.27872	0.318535	0.186509	NA	NA	NA
TraesCS1A02G217100	C1	7.34674	1.4136	3.50794	3.85627	4.02506	NA	NA	NA
TraesCS1A02G217600	C1	10.8891	7.1507	4.08651	3.74159	3.67791	AT1G70160	AT1G70160	zinc finger MYND domain protein;(source:Araport11)
TraesCS1A02G218000	C1	4.09643	2.7683	1.97788	3.0096	3.48912	NA	NA	NA
TraesCS1A02G218100	C1	5.40029	0.146417	0	0.130104	0.33928	AT5G07580;AT5G61590	ERF106;ERF107	encodes a member of the ERF (ethylene response factor) subfamily B-3 of ERF/AP2 transcription factor family. The protein contains one AP2 domain. There are 18 members in this subfamily including ATERF-1, ATERF-2, AND ATERF-5.;Encodes an AP2/ERF-type transcription factor that is preferentially expressed in the epidermis and induced by darkness and negatively regulates cuticular wax biosynthesis.
TraesCS1A02G218500	C1	6.0139	3.6169	3.50084	3.51642	5.49899	NA	NA	NA
TraesCS1A02G218600	C1	4.78124	0	0.0338352	0.0148312	0	AT4G16820	PLA-I{beta]2	Encodes a lipase that hydrolyzes phosphatidylcholine, glycolipids as well as triacylglycerols.
TraesCS1A02G220000	C1	1.46543	1.0391	0.244556	0.30701	0.279062	AT2G44940;AT3G60490	ERF034;ERF035	encodes a member of the DREB subfamily A-4 of ERF/AP2 transcription factor family. The protein contains one AP2 domain. There are 17 members in this subfamily including TINY.;encodes a member of the DREB subfamily A-4 of ERF/AP2 transcription factor family. The protein contains one AP2 domain. There are 17 members in this subfamily including TINY.
TraesCS1A02G220500	C1	3.4211	0.709635	1.30885	2.33716	1.75783	AT2G45010;AT5G51400	AT2G45010;AT5G51400	PLAC8 family protein;(source:Araport11);PLAC8 family protein;(source:Araport11)
TraesCS1A02G221200	C1	3.55212	1.43669	0.81864	1.63181	1.75431	NA	NA	NA
TraesCS1A02G221600	C1	1.22327	0.225687	0.0364906	0.246219	0.219349	NA	NA	NA
TraesCS1A02G221700	C1	3.26604	0.425701	0.428548	0.800104	0.685257	NA	NA	NA
TraesCS1A02G221900	C1	78.7133	36.1436	27.6504	26.0229	23.9728	AT3G11020;AT5G05410	DREB2B;DREB2A	encodes a member of the DREB subfamily A-2 of ERF/AP2 transcription factor family (DREB2B). The protein contains one AP2 domain. There are eight members in this subfamily including DREB2A.;Encodes a transcription factor that specifically binds to DRE/CRT cis elements (responsive to drought and low-temperature stress). Belongs to the DREB subfamily A-2 of ERF/AP2 transcription factor family (DREB2…
TraesCS1A02G222700	C1	0.489663	0.032822	0.048275	0	0.0435134	AT2G40270;AT3G56050;AT5G07150;AT5G58540	AT2G40270;AT3G56050;AT5G07150;AT5G58540	Protein kinase family protein;(source:Araport11);Protein kinase family protein;(source:Araport11);Leucine-rich repeat protein kinase family protein;(source:Araport11);Protein kinase superfamily protein;(source:Araport11)
TraesCS1A02G223200	C1	10.9346	5.36933	5.16553	6.29555	6.26616	AT5G58575	AT5G58575	Component of the deubiquitination module of the SAGA complex.
TraesCS1A02G223300	C1	19.2728	15.1758	14.7284	7.85841	6.0582	AT4G32770	VTE1	Tocopherol cyclase involved in tocopherol (vitamin E)synthesis. VTE1 over-expressing plants have increased tocopherol indicating VTE1 is a major limiting factor in tocopherol synthesis. Mutants defective in this gene accumulate high amounts of zeaxanthin in conditions of high light or low temperature. Plays a role in the adaptation to low temperature stress, notably phloem loading.
TraesCS1A02G223400	C1	16.7713	7.35727	1.08832	0.307497	0.298415	AT2G40220	ABI4	Encodes a member of the DREB subfamily A-3 of ERF/AP2 transcription factor family (ABI4). The protein contains one AP2 domain. There is only one member in this family. Involved in abscisic acid (ABA) signal transduction, ABA-mediated glucose response, and hexokinase-dependent sugar responses. Acts downstream of GUN1 in retrograde signaling. Expressed most abundantly in developing siliques and to …
TraesCS1A02G223600	C1	5.25109	0.0727069	0	0	0	NA	NA	NA
TraesCS1A02G224200	C1	1.13353	0	0.184753	0.0426538	0	NA	NA	NA
TraesCS1A02G224600	C1	65.8713	4.56188	13.4256	0.427598	0.204547	NA	NA	NA
TraesCS1A02G228200	C1	10.3921	0.583998	0.246259	1.92714	1.0282	AT3G05640;AT3G16800;AT5G27930	AT3G05640;AT3G16800;PPC6-7	EGR1 functions as a negative regulator of plant growth with prominent effect on plant growth during drought stress.EGR1 regulates microtubule organization and likely affects additional cytoskeleton and trafficking processes along the plasma membrane.;EGR3 functions as a negative regulator of plant growth with prominent effect on plant growth during drought stress, EGR3 regulates microtubule organ…
TraesCS1A02G228700	C1	379.729	136.77	236.369	181.655	187.104	AT1G07790;AT2G28720;AT2G37470;AT3G09480;AT3G45980;AT3G46030;AT3G53650;AT5G02570;AT5G22880;AT5G59910	HTB1;AT2G28720;AT2G37470;AT3G09480;H2B;HTB11;AT3G53650;AT5G02570;H2B;HTB4	Encodes a histone 2B (H2B) protein.;Histone superfamily protein;(source:Araport11);Histone superfamily protein;(source:Araport11);Histone superfamily protein;(source:Araport11);Encodes a histone 2B (H2B) protein. This protein can be ubiquitinated in planta, and this modification depends on the HUB1 and HUB2 E3 ubiquitin ligases as well as the UBC1 and UBC2 E2 ubiquitin conjugating enzymes. Lysine…
TraesCS1A02G229100	C1	252.94	117.388	217.241	175.351	171.985	AT1G07790;AT2G28720;AT2G37470;AT3G09480;AT3G45980;AT3G46030;AT3G53650;AT5G02570;AT5G22880;AT5G59910	HTB1;AT2G28720;AT2G37470;AT3G09480;H2B;HTB11;AT3G53650;AT5G02570;H2B;HTB4	Encodes a histone 2B (H2B) protein.;Histone superfamily protein;(source:Araport11);Histone superfamily protein;(source:Araport11);Histone superfamily protein;(source:Araport11);Encodes a histone 2B (H2B) protein. This protein can be ubiquitinated in planta, and this modification depends on the HUB1 and HUB2 E3 ubiquitin ligases as well as the UBC1 and UBC2 E2 ubiquitin conjugating enzymes. Lysine…
TraesCS1A02G229800	C1	0.697789	0.14638	0.240605	0.307571	0.604462	AT4G02440	EID1	EID1 is an F-box protein that functions as a negative regulator in phytochrome A (phyA)-specific light signalling. Expressed at all stages of plant development independently of light conditions, localizes to the nucleus, and forms nuclear speckles under continuous far-red light. Forms stable dimeric and trimeric complexes with several ASK proteins and Cullin1 in yeast and in planta.
TraesCS1A02G230200	C1	1.48542	0.998812	0.0480722	0.0421437	0.0871579	NA	NA	NA
TraesCS1A02G230500	C1	2.37459	1.47756	1.22435	1.47114	0.313784	AT2G47630;AT3G62860	AT2G47630;AT3G62860	alpha/beta-Hydrolases superfamily protein;(source:Araport11);alpha/beta-Hydrolases superfamily protein;(source:Araport11)
TraesCS1A02G231100	C1	20.6675	12.346	13.642	16.0247	12.1486	NA	NA	NA
TraesCS1A02G231200	C1	194.043	47.9951	24.7735	27.6927	16.7956	AT3G16770	RAP2-3	Encodes a member of the ERF (ethylene response factor) subfamily B-2 of the plant specific ERF/AP2 transcription factor family (RAP2.3). The protein contains one AP2 domain. There are 5 members in this subfamily including RAP2.2 AND RAP2.12.It is localized to the nucleus and acts as a transcriptional activator through the GCC-box. It has been identified as a suppressor of Bax-induced cell death b…
TraesCS1A02G231700	C1	3.80487	0.132758	0	2.42773	1.91722	NA	NA	NA
TraesCS1A02G232600	C1	0.400741	0	0	0	0	NA	NA	NA
TraesCS1A02G233100	C1	0.156063	0.0253784	0.0924355	0.0537195	0.0865862	NA	NA	NA
TraesCS1A02G233800	C1	8.42302	4.44769	3.87434	0.307023	0.17942	AT1G23320;AT1G70560;AT4G24670	TAR1;TAA1;TAR2	Encodes a protein with similarity to the TAA1 trytophan aminotransferase involved in IAA biosynthesis. This gene appears to be expressed at a very low level during seedling development. Triple mutant analyses implicate this gene in embryonic development.;TAA1 is involved in the shade-induced production of indole-3-pyruvate (IPA), a precursor to IAA, a biologically active auxin. It is also involve…
TraesCS1A02G235000	C1	10.4998	6.15792	3.45784	0.848288	0.357156	NA	NA	NA
TraesCS1A02G236100	C1	2.07807	0.440709	1.65454	1.32324	0.934946	AT1G08860	BON3	Encodes a copine-like protein, which is a member of a newly identified class of calcium-dependent, phospholipid binding proteins that are present in a wide range of organisms. Overexpression of this gene suppresses bon1-1 phenotypes. Double mutant analyses with bon1-1 suggest that BON1 and BON3 have overlapping functions in maintaining cellular homeostasis and inhibiting cell death.
TraesCS1A02G238600	C1	0.723426	0.143355	0.230499	0.44133	0.271212	NA	NA	NA
TraesCS1A02G238800	C1	91.2386	4.56161	11.9631	2.76005	2.55637	NA	NA	NA
TraesCS1A02G239100	C1	81.7192	4.2159	4.33969	4.33074	7.1249	NA	NA	NA
TraesCS1A02G240300	C1	6.6102	5.27815	5.35598	5.11904	5.78803	AT2G01210	ZAR1	ZAR1 encodes a plasma membrane localized leucine-rich repeat receptor-like kinase (LRR-RLK) that contains a putative CaM-binding domain and a G&#946;-binding motif within its intracellular kinase region. Homozygous of function mutations are embryo-lethal and fail to properly make the first asymmetric division of the zygote. ZAR1 interacts with both CaM and G&#946; in vivo and that interaction act…
TraesCS1A02G242000	C1	0.179974	0	0	0	0	NA	NA	NA
TraesCS1A02G242400	C1	119.822	28.9085	69.4943	10.4196	5.36547	NA	NA	NA
TraesCS1A02G242500	C1	4.82361	4.42919	4.2592	3.17438	2.17881	AT3G21070	NADK1	Encodes a protein with NAD(H) kinase activity.
TraesCS1A02G243000	C1	9.43762	8.75927	6.9924	3.54002	2.01707	AT1G64890	AT1G64890	Major facilitator superfamily protein;(source:Araport11)
TraesCS1A02G244700	C1	11.1229	6.67013	7.25873	9.11669	9.34547	AT1G09010	EBM	glycoside hydrolase family 2 protein;(source:Araport11)
TraesCS1A02G244800	C1	36.1777	26.8828	30.309	1.63588	1.5368	AT1G75490;AT5G18450	DREB2D;DREB2G	encodes a member of the DREB subfamily A-2 of ERF/AP2 transcription factor family. The protein contains one AP2 domain. There are eight members in this subfamily including DREB2A AND DREB2B that are involved in response to drought.;encodes a member of the DREB subfamily A-2 of ERF/AP2 transcription factor family. The protein contains one AP2 domain. There are eight members in this subfamily inclu…
TraesCS1A02G244900	C1	11.2464	8.94366	6.04874	8.72267	8.68371	NA	NA	NA
TraesCS1A02G247500	C1	30.7187	14.6946	21.459	18.2153	22.3797	AT1G52320;AT5G25590	AT1G52320;AT5G25590	kinesin-like protein;(source:Araport11);DNA ligase (DUF630 and DUF632);(source:Araport11)
TraesCS1A02G248200	C1	15.198	7.5161	5.08161	7.15308	6.98821	AT3G17611	RBL14	RHOMBOID-like protein 14;(source:Araport11)
TraesCS1A02G249500	C1	5.00621	2.31796	2.59493	1.53316	1.39845	AT1G54820	AT1G54820	Protein kinase superfamily protein;(source:Araport11)
TraesCS1A02G249900	C1	0.426309	0.173848	0.0323759	0.0597967	0.0921756	AT3G23570;AT3G23600	AT3G23570;AT3G23600	alpha/beta-Hydrolases superfamily protein;(source:Araport11);alpha/beta-Hydrolases superfamily protein;(source:Araport11)
TraesCS1A02G250100	C1	1.48888	0.0223643	0.13174	0.162184	0.0739517	AT3G23570;AT3G23600	AT3G23570;AT3G23600	alpha/beta-Hydrolases superfamily protein;(source:Araport11);alpha/beta-Hydrolases superfamily protein;(source:Araport11)
TraesCS1A02G250700	C1	5.33173	0.875249	2.01424	2.54989	3.91591	NA	NA	NA
TraesCS1A02G254000	C1	0.569112	0.170941	0	0.121141	0.437104	AT1G75130	CYP721A1	member of CYP721A
TraesCS1A02G254400	C1	2.02107	1.64643	0.919662	1.29867	1.23144	AT4G15545	AT4G15545	NAI1 interacting protein, involved in ER body formation.
TraesCS1A02G254800	C1	8.244	1.99212	7.05355	6.22496	5.79878	AT1G03440;AT4G03010	AT1G03440;AT4G03010	Leucine-rich repeat (LRR) family protein;(source:Araport11);RNI-like superfamily protein;(source:Araport11)
TraesCS1A02G255400	C1	30.3654	6.65617	6.05122	15.4744	12.0302	NA	NA	NA
TraesCS1A02G255600	C1	1.91262	0.224623	1.88071	0.534851	0.797408	AT5G02750	SGR9	Encodes an E3 ligase, SHOOT GRAVITROPISM9. Modulates the interaction between statoliths and F-Actin in gravity sensing.
TraesCS1A02G256400	C1	27.5449	15.8373	10.8384	15.0321	14.9685	NA	NA	NA
TraesCS1A02G257300	C1	7.23012	7.1174	4.43255	6.92182	4.80464	AT3G18170;AT3G18180	AT3G18170;AT3G18180	Glycosyltransferase family 61 protein;(source:Araport11);Glycosyltransferase family 61 protein;(source:Araport11)
TraesCS1A02G257500	C1	2.87809	1.18811	0.0815127	0.189643	0.671481	NA	NA	NA
TraesCS1A02G259200	C1	67.9169	10.876	9.57729	10.7005	9.18378	AT3G10820;AT5G05140	MED26A;MED26B	Transcription elongation factor (TFIIS) family protein;(source:Araport11);Transcription elongation factor (TFIIS) family protein;(source:Araport11)
TraesCS1A02G259500	C1	16.4999	1.29339	1.664	2.85336	2.6663	NA	NA	NA
TraesCS1A02G259800	C1	13.2905	13.2107	7.37527	6.20275	4.63574	AT1G65590	HEXO3	Encodes a protein with beta-hexosaminidase activity. Located on the plasma membrane.
TraesCS1A02G261100	C1	0.149173	0.0158978	0	0	0	NA	NA	NA
TraesCS1A02G261400	C1	9.69702	2.00316	0.801235	0.361818	0.0457374	AT2G44110;AT4G02600	MLO15;MLO1	A member of a large family of seven-transmembrane domain proteins specific to plants, homologs of the barley mildew resistance locus o (MLO) protein. The Arabidopsis genome contains 15 genes encoding MLO proteins, with localization in plasma membrane. Phylogenetic analysis revealed four clades of closely-related AtMLO genes. ATMLO15 belongs to the clade II, with ATMLO13 and ATMLO15. The gene is e…
TraesCS1A02G262100	C1	2.75778	0.121025	0.0221879	0.0450911	0.0419203	AT5G38520	AT5G38520	CLD1 is involved in steady-state chlorophyll turnover; CLD1 dephytylates chlorophyll a, chlorophyll b, and pheophytin a in vitro; CLD1 and CHLG form a salvage cycle in recycling chlorophyll. Suppression of CLD1 expression results in reduced tolerance to moderately high temperature.
TraesCS1A02G262300	C1	28.9609	18.2403	25.1548	26.7269	24.0006	AT5G49820	RUS6	root UVB sensitive protein (Protein of unknown function, DUF647);(source:Araport11)
TraesCS1A02G262800	C1	26.8785	19.2759	17.6816	19.3169	15.2239	AT1G09645;AT1G57765	AT1G09645;AT1G57765	transmembrane protein;(source:Araport11);transmembrane protein;(source:Araport11)
TraesCS1A02G262900	C1	24.7923	0.986176	0.534348	1.55146	4.30365	AT1G71691	AT1G71691	GDSL-motif esterase/acyltransferase/lipase. Enzyme group with broad substrate specificity that may catalyze acyltransfer or hydrolase reactions with lipid and non-lipid substrates.
TraesCS1A02G263100	C1	1.36913	0.108429	0.0582615	0.102153	0.105632	AT1G22810;AT1G71520	ERF019;ERF020	encodes a member of the DREB subfamily A-5 of ERF/AP2 transcription factor family. The protein contains one AP2 domain. There are 16 members in this subfamily including RAP2.1, RAP2.9 and RAP2.10. Overexpression leands to delayed senescence and delayed flowering. Negatively regulates plant resistance to P. parasitica by suppressing PAMP-triggered immunity.;encodes a member of the DREB subfamily A…
TraesCS1A02G263600	C1	0.66813	0.224472	0.481446	0.0223518	0	AT1G44090	GA20OX5	Encodes a gibberellin 20-oxidase.
TraesCS1A02G263900	C1	0.284573	0	0	0	0.01397	AT1G02810;AT2G47550;AT4G02330	PME7;PME20;PME41	Plant invertase/pectin methylesterase inhibitor superfamily;(source:Araport11);Plant invertase/pectin methylesterase inhibitor superfamily;(source:Araport11);Encodes a pectin methylesterase that is sensitive to chilling stress and brassinosteroid regulation.
TraesCS1A02G264200	C1	12.8324	3.02757	4.63057	3.22401	2.97544	NA	NA	NA
TraesCS1A02G264500	C1	22.9382	1.99002	14.2929	4.85707	2.28558	AT5G09220;AT5G63850	AAP2;AAP4	member of AAAP family The mRNA is cell-to-cell mobile.;Amino acid transporter whose expression is downregulated by dehydration.
TraesCS1A02G265200	C1	1.01741	0.189133	0.408493	0	0.0228303	AT1G21460	SWEET1	Nodulin MtN3 family protein;(source:Araport11)
TraesCS1A02G266600	C1	2.63292	0.318175	0.879585	0.80934	0.953784	AT1G77130;AT3G18660	GUX3;GUX1	Encodes a glucuronyltransferase responsible for the addition of GlcA residues onto xylan and for secondary wall deposition.;Plants expressing an RNAi construct specifically targeting PGSIP1 was shown to have a dramatically reduced amount of starch. Encodes a glucuronyltransferase responsible for the addition of GlcA residues onto xylan and for secondary wall deposition.
TraesCS1A02G267800	C1	29.9044	8.77778	6.13454	6.53507	5.09865	AT1G44760	AT1G44760	Adenine nucleotide alpha hydrolases-like superfamily protein;(source:Araport11)
TraesCS1A02G268200	C1	7.86878	1.39473	0.140694	0.809212	1.86064	NA	NA	NA
TraesCS1A02G268500	C1	16.3463	10.8165	13.0641	10.663	13.743	AT1G22530;AT1G72150;AT1G72160;AT4G09160	PATL2;PATL1;PATL3;PATL5	PATLs belong to a family of proteins having a Golgi dynamics (GOLD) domain in tandem with the Sec14p-like domain. PATLs are auxin regulated. Quadruple mutants (patl2456) show altered PIN1 lateralization in root endodermis cells.;novel cell-plate-associated protein that is related in sequence to proteins involved in membrane trafficking in other eukaryotes The mRNA is cell-to-cell mobile.;Sec14p-l…
TraesCS1A02G268800	C1	1.33358	0.0920667	0	0.0997906	0.074826	NA	NA	NA
TraesCS1A02G270700	C1	35.6197	11.8579	11.5555	17.4495	17.0008	AT1G71950	AT1G71950	SPI-1 is a member of the I9 inhibitor family. It is an inhibitor of SBT4.13 subtilase.
TraesCS1A02G270800	C1	5.07521	0	0.114268	0.121788	0.106523	AT1G10940;AT1G60940	ASK1;SRK2B	Encodes a plant protein kinase similar to the calcium/calmodulin-dependent protein kinase subfamily and the SNF1 kinase subfamily (SnRK2) whose activity is activated by ionic (salt) and non-ionic (mannitol) osmotic stress. Kinase activity of its homolog in tobacco is induced by hyperosmotic condition within 1 minute. Phosphatidylinositol 4-phosphate 5-kinase (PIP5K) enzyme family member.;encodes …
TraesCS1A02G271800	C1	52.2409	2.83437	0.675316	6.52244	6.16073	AT1G44414	AT1G44414	zinc-ribbon domain protein;(source:Araport11)
TraesCS1A02G272000	C1	0.142951	0.0504026	0.0226818	0.0236004	0	NA	NA	NA
TraesCS1A02G272100	C1	10.1042	2.08629	1.14611	1.89934	2.05699	AT4G02630	AT4G02630	Protein kinase superfamily protein;(source:Araport11)
TraesCS1A02G273100	C1	27.5006	7.84965	12.4358	15.5912	19.2387	AT1G25280;AT1G43640;AT1G76900	TULP10;TULP5;TULP1	Member of TLP family;Member of TLP family of tubby like proteins that also contain an F-Box.;Member of plant TLP family. Contains terminal F-box domain, interacts with ASK proteins. Tethered to the PM.
TraesCS1A02G273200	C1	0.697726	0.0793366	0	0	0	NA	NA	NA
TraesCS1A02G273500	C1	20.5309	2.02855	4.11645	7.83349	3.22586	AT1G01050;AT2G46860;AT4G01480	PPA1;PPA3;PPA5	Encodes a soluble protein with inorganic pyrophosphatase activity that is highly specific for Mg-inorganic pyrophosphate.;Encodes a protein that might have inorganic pyrophosphatase activity.;Encodes a protein that might have inorganic pyrophosphatase activity.
TraesCS1A02G275200	C1	43.8045	29.5117	29.1842	29.7334	22.482	AT5G06370	AT5G06370	PSE1 is a single copy gene that is induced in response to lead and confers increased tolerance to lead when overexpressed. It is localized to the cytoplasm. The protein has an NC domain. PSE1 appears to regulate tolerance via a GSH dependent phytochelatin synthesis pathway.
TraesCS1A02G275800	C1	5.45886	0	0	0	0	AT3G10580;AT3G10590;AT4G09450	AT3G10580;AT3G10590;AT4G09450	Homeodomain-like superfamily protein;(source:Araport11);Duplicated homeodomain-like superfamily protein;(source:Araport11);Duplicated homeodomain-like superfamily protein;(source:Araport11)
TraesCS1A02G277400	C1	6.1261	0.334581	0.0267864	0.199974	0.151767	AT2G27690	CYP94C1	Encodes a CYP94C1. Has highest omega-hydroxylase activity with 9,10-epoxystearic acid, while also metabolized lauric acid (C12:0) and C18 unsaturated fatty acids. Gene expression is induced in response to wounding and jasmonic acid treatment.
TraesCS1A02G277700	C1	9.76763	3.53872	6.70676	6.85677	7.22677	NA	NA	NA
TraesCS1A02G278000	C1	20.8345	4.74241	4.38481	2.37071	2.49025	NA	NA	NA
TraesCS1A02G278200	C1	14.6397	10.3567	7.41834	8.66477	7.93404	AT5G01260	AT5G01260	Carbohydrate-binding-like fold;(source:Araport11)
TraesCS1A02G278300	C1	17.8056	7.29104	7.79378	11.6935	11.1083	AT5G05710	AT5G05710	Pleckstrin homology (PH) domain superfamily protein;(source:Araport11)
TraesCS1A02G278600	C1	16.798	8.27577	13.2242	8.12685	8.39321	NA	NA	NA
TraesCS1A02G279000	C1	7.46106	3.45947	2.12339	2.12387	2.3814	AT3G47000;AT3G47010;AT3G47040;AT3G47050	AT3G47000;AT3G47010;AT3G47040;AT3G47050	Glycosyl hydrolase family protein;(source:Araport11);Glycosyl hydrolase family protein;(source:Araport11);Glycosyl hydrolase family protein;(source:Araport11);Glycosyl hydrolase family protein;(source:Araport11)
TraesCS1A02G279200	C1	8.82321	4.10299	7.77289	7.00262	8.44999	AT2G38070;AT3G09070;AT3G46990;AT5G01170;AT5G58930	AT2G38070;OPS;AT3G46990;OPSL1;AT5G58930	OPL2 is a homolog of OPS and also shares overlapping expression and functions. opl2/ops double mutants have more severe delay in protophloem development and additionally defects in metaphloem sieve tube development. OPL2 can functionally compensate for lack of OPS when its expression is driven by the OPS promoter.;Encodes a polarly localised membrane-associated protein that regulates phloem diffe…
TraesCS1A02G280900	C1	9.11922	1.2788	3.93512	4.3897	6.12025	NA	NA	NA
TraesCS1A02G281100	C1	0.274263	0.258968	0	0	0.0322698	AT5G02030	BLH9	Mutant has additional lateral organs and phyllotaxy defect. Encodes a homeodomain transcription factor. Has sequence similarity to the Arabidopsis ovule development regulator Bell1. Binds directly to the AGAMOUS cis-regulatory element. Its localization to the nucleus is dependent on the coexpression of either STM or BP.
TraesCS1A02G283100	C1	0.147821	0.0262137	0	0	0.0649946	AT3G11325;AT3G11430;AT5G06090	AT3G11325;GPAT5;GPAT7	Phospholipid/glycerol acyltransferase family protein;(source:Araport11);sn-glycerol-3-phosphate 2-O-acyltransferas, involved in the biosynthesis of suberin polyester.;putative sn-glycerol-3-phosphate 2-O-acyltransferase
TraesCS1A02G283600	C1	0.253485	0	0.0699439	0	0.231519	AT2G28660	AT2G28660	Chloroplast-targeted copper chaperone protein;(source:Araport11)
TraesCS1A02G284300	C1	11.7773	3.53348	8.34343	8.64683	7.13134	AT5G02370	AT5G02370	ATP binding microtubule motor family protein;(source:Araport11)
TraesCS1A02G285000	C1	1529.36	218.439	67.7452	258.096	313.712	AT3G12580	MED37C	heat shock protein 70;(source:Araport11)
TraesCS1A02G285600	C1	2.09815	1.32702	0.979877	1.42763	1.00965	AT5G59770	AT5G59770	Protein-tyrosine phosphatase-like, PTPLA;(source:Araport11)
TraesCS1A02G286900	C1	117.89	47.1663	61.7111	76.491	92.7072	AT5G02560	HTA12	Encodes HTA12, a histone H2A protein.
TraesCS1A02G287000	C1	22.2759	0.393691	0.296616	0.270098	0.399849	NA	NA	NA
TraesCS1A02G287400	C1	12.6441	7.02283	6.17276	6.4697	6.16662	AT3G09560	PAH1	The PAH1 gene encodes a phosphatidate phosphohydrolase. Mutant analysis revealed its involvement in galactolipid synthesis pathway, and the membrane lipid remodeling. The pah1pah2 double-mutant showed enhanced Al-susceptibility under low-P conditions, but there was no significant differences in Al tolerance between pah1pah2 and wild type when they were grown in a solution containing 35 &#956;M Pi.
TraesCS1A02G287700	C1	103.783	31.3723	87.7692	80.3936	80.108	NA	NA	NA
TraesCS1A02G289200	C1	16.5786	0	0	0	0	NA	NA	NA
TraesCS1A02G289800	C1	3.97575	0	0	0.188062	0	NA	NA	NA
TraesCS1A02G289900	C1	17.5409	0.85925	0	0	0.286554	NA	NA	NA
TraesCS1A02G290200	C1	1.56132	0	0	0	0.0572776	NA	NA	NA
TraesCS1A02G291700	C1	185.876	80.5984	139.294	103.952	93.0605	NA	NA	NA
TraesCS1A02G291800	C1	0.599737	0.187129	0.173971	0.348618	0.215669	NA	NA	NA
TraesCS1A02G291900	C1	0.403161	0	0.157649	0.215518	0.328955	AT2G40650	PRP38	PRP38 family protein;(source:Araport11)
TraesCS1A02G292800	C1	0.336644	0.190817	0.0681852	0	0	NA	NA	NA
TraesCS1A02G294700	C1	0.749682	0.276854	0.475147	0.283105	0.133194	NA	NA	NA
TraesCS1A02G295600	C1	58.6065	8.50681	4.60583	8.67128	10.9716	AT4G37910	HSP70-9	mitochondrial heat shock protein 70-1;(source:Araport11)
TraesCS1A02G295700	C1	219.237	105.121	205.205	158.261	167.208	NA	NA	NA
TraesCS1A02G295800	C1	145.931	32.089	77.9717	5.43605	3.08853	AT5G01300	AT5G01300	PEBP (phosphatidylethanolamine-binding protein) family protein;(source:Araport11)
TraesCS1A02G296300	C1	5.65753	5.59718	3.56406	4.92334	3.48523	NA	NA	NA
TraesCS1A02G297800	C1	7.84211	6.33476	5.06584	6.03802	4.91553	AT1G07000;AT5G58430	ATEXO70B2;EXO70B1	A member of EXO70 gene family, putative exocyst subunits, conserved in land plants. Arabidopsis thaliana contains 23 putative EXO70 genes, which can be classified into eight clusters on the phylogenetic tree.;A member of EXO70 gene family, putative exocyst subunits, conserved in land plants. Arabidopsis thaliana contains 23 putative EXO70 genes, which can be classified into eight clusters on the …
TraesCS1A02G298200	C1	51.211	12.258	11.955	1.19392	0.349836	AT5G01670	AT5G01670	NAD(P)-linked oxidoreductase superfamily protein;(source:Araport11)
TraesCS1A02G298700	C1	11.4645	7.43288	8.55958	9.33969	9.72517	AT3G10980;AT5G05350	AT3G10980;AT5G05350	PLAC8 family protein;(source:Araport11);PLAC8 family protein;(source:Araport11)
TraesCS1A02G298800	C1	1.26658	0.0778678	0.133458	0.670505	0.122915	NA	NA	NA
TraesCS1A02G300000	C1	3.52175	2.92017	1.28435	2.54792	2.18022	AT5G01830	PUB16	Plant U-box type E3 ubiquitin ligase (PUB).
TraesCS1A02G300200	C1	0.697262	0	0	0.172179	0.100869	AT2G40610	EXPA8	member of Alpha-Expansin Gene Family. Naming convention from the Expansin Working Group (Kende et al, 2004. Plant Mol Bio). Involved in the formation of nematode-induced syncytia in roots of Arabidopsis thaliana.
TraesCS1A02G300300	C1	183.349	105.35	31.6497	0.958677	0.611635	NA	NA	NA
TraesCS1A02G300900	C1	3.90282	3.24147	2.77525	1.9243	0.886441	AT2G40750;AT3G56400	WRKY54;WRKY70	member of WRKY Transcription Factor; Group III. Together with WRKY70 positively regulates SARD1 and CBP60g expression in plant immunity.;Member of WRKY Transcription Factor; Group III. Function as activator of SA-dependent defense genes and a repressor of JA-regulated genes. WRKY70-controlled suppression of JA-signaling is partly executed by NPR1.
TraesCS1A02G301100	C1	6.29828	0.0202149	0.0723503	0.623675	1.49367	NA	NA	NA
TraesCS1A02G301400	C1	0.747396	0.270524	0.177136	0.179576	0.16522	AT5G01920	STN8	Chloroplast thylakoid protein kinase STN8 is specific in phosphorylation of N-terminal threonine residues in D1, D2 and CP43 proteins, and Thr-4 in PsbH protein of photosystem II. Phosphorylation of Thr-4 in the wild type required both light and prior phosphorylation at Thr-2.
TraesCS1A02G301800	C1	1.13995	0.901383	0.639057	0.542207	0.643617	NA	NA	NA
TraesCS1A02G303400	C1	0.724483	0	0.06283	0.125769	0.28225	NA	NA	NA
TraesCS1A02G305300	C1	3.65777	2.07896	1.93626	1.6798	1.79269	NA	NA	NA
TraesCS1A02G307700	C1	39.7878	28.3151	34.7348	39.455	23.5382	NA	NA	NA
TraesCS1A02G307800	C1	27.5102	3.35287	6.22177	3.44509	4.34794	AT1G22220;AT1G78100	AT1G22220;AT1G78100	F-box family protein;(source:Araport11);F-box family protein;(source:Araport11)
TraesCS1A02G307900	C1	4.23321	1.84511	2.43303	2.07097	1.07102	NA	NA	NA
TraesCS1A02G308000	C1	4.94917	1.38101	1.81909	1.77292	1.92003	NA	NA	NA
TraesCS1A02G308300	C1	11.4255	3.07209	3.01383	2.61948	3.29086	AT1G73100;AT5G04940	SUVH3;SUVH1	Encodes a SU(VAR)3-9 homolog, a SET domain protein. Known SET domain proteins are involved in epigenetic control of gene expression and act as histone methyltransferases. There are 10 SUVH genes in Arabidopsis and members of this subfamily of the SET proteins have an additional conserved SRA domain.;Encodes a SU(VAR)3-9 homolog, a SET domain protein. Known SET domain proteins are involved in epig…
TraesCS1A02G308500	C1	0.922413	0.244605	0.379456	0.591998	0.755329	AT3G51510	AT3G51510	transmembrane protein;(source:Araport11)
TraesCS1A02G310500	C1	42.8279	24.7924	7.08343	13.4269	12.1016	AT2G40890	CYP98A3	encodes coumarate 3-hydroxylase (C3H), a P450-dependent monooxygenase. Involved in lignin biosynthesis and flavonoid biosynthesis. Also affects the biosynthesis of coumarins such as scopoletin and scopolin as a branching-out-pathway from the phenylpropanoid acid level.
TraesCS1A02G311300	C1	3.45095	2.28712	1.36332	1.97866	1.89952	NA	NA	NA
TraesCS1A02G311700	C1	4.21901	0	0.084807	0	0	NA	NA	NA
TraesCS1A02G312400	C1	0.242757	0	0	0.0383149	0.0164993	AT2G41540;AT3G07690	GPDHC1;AT3G07690	Encodes a protein with NAD-dependent glycerol-3-phosphate (G3P) dehydrogenase which was shown to complement an Escherichia coli strain: BB20-14, auxotrophic for glycerol/G3P due to a loss-of-function mutation in the gpsA gene.;6-phosphogluconate dehydrogenase family protein;(source:Araport11)
TraesCS1A02G312900	C1	1.24901	0	0.204211	0	0.150948	NA	NA	NA
TraesCS1A02G313900	C1	14.9767	6.39372	3.9363	3.77845	5.22953	AT1G16420;AT1G79310;AT1G79320;AT1G79330;AT1G79340	AMC8;AMC7;AMC6;AMC5;AMC4	Encodes a metacaspase (cysteine-type endopeptidase) that is involved in promoting programmed cell death in response to hydrogen peroxide (H2O2), UV light, and methyl viologen (MV). Transcript levels rise in response to UV-C, H2O2, and MV. In vitro assays demonstrate that this enzyme has a preference for cleaving after an arginine residue, and it has a pH optimum of 8.0.;Encodes a putative metacas…
TraesCS1A02G314300	C1	143.725	57.0473	38.8574	42.4426	55.5971	AT1G53170;AT3G15210;AT5G44210	ERF8;ERF4;ERF9	encodes a member of the ERF (ethylene response factor) subfamily B-1 of ERF/AP2 transcription factor family (ATERF-8). The protein contains one AP2 domain. There are 15 members in this subfamily including ATERF-3, ATERF-4, ATERF-7, and leafy petiole.;Encodes a member of the ERF (ethylene response factor) subfamily B-1 of ERF/AP2 transcription factor family (ATERF-4). The protein contains one AP2 …
TraesCS1A02G314900	C1	4.22659	1.8834	3.05225	0.153621	0.100143	NA	NA	NA
TraesCS1A02G316900	C1	182.662	129.329	96.7851	107.768	80.2195	NA	NA	NA
TraesCS1A02G317000	C1	11.5525	5.59894	6.36884	5.93015	7.03404	AT1G11690	AT1G11690	BRANCHLESS TRICHOME-like protein;(source:Araport11)
TraesCS1A02G320000	C1	124.242	29.306	24.1754	12.2606	7.56333	AT1G49390;AT5G20400	AT1G49390;AT5G20400	2-oxoglutarate (2OG) and Fe(II)-dependent oxygenase superfamily protein;(source:Araport11);encodes a protein whose sequence is similar to flavanone 3 hydroxylase from Malus. The mRNA is cell-to-cell mobile.
TraesCS1A02G321000	C1	77.9977	48.2267	50.8398	50.2731	47.9423	AT1G11360;AT4G27320;AT5G54430	AT1G11360;PHOS34;ATPHOS32	Adenine nucleotide alpha hydrolases-like superfamily protein;(source:Araport11);Contains a universal stress protein domain. Protein is phosphorylated in response to Phytophthora infestans zoospores and xylanase.;Contains a universal stress protein domain. Protein is phosphorylated in response to Phytophthora infestans zoospores and xylanase.
TraesCS1A02G322300	C1	7.50595	4.60477	6.47563	7.21646	5.55605	AT4G14570	AT4G14570	Encodes an acylamino acid-releasing enzyme (AARE) catalyzing the N-terminal hydrolysis of N[alpha]-acylpeptides to release N[alpha]-acylated amino acids The mRNA is cell-to-cell mobile.
TraesCS1A02G323800	C1	1.27376	0	0.0674221	0.596596	0.451781	NA	NA	NA
TraesCS1A02G328000	C1	59.1973	23.6301	41.8642	5.6751	3.56966	AT5G22470	AT5G22470	PARP3 is one of three canonical PARPs in Arabidopsis.
TraesCS1A02G328800	C1	0.474934	0	0	0	0	NA	NA	NA
TraesCS1A02G329500	C1	0.158514	0	0	0	0	NA	NA	NA
TraesCS1A02G330100	C1	87.9844	57.7849	57.9152	68.4229	64.2208	AT5G08290	YLS8	Encodes Dim1 homolog.
TraesCS1A02G330900	C1	18.3259	2.36932	2.43337	6.26784	8.74238	NA	NA	NA
TraesCS1A02G331400	C1	0.530327	0.091686	0	0.0654073	0.154814	NA	NA	NA
TraesCS1A02G332200	C1	2.25453	1.33395	1.31857	1.37058	1.21656	AT3G01060	AT3G01060	lysine-tRNA ligase;(source:Araport11)
TraesCS1A02G332600	C1	1.94473	0.905185	0.213555	0.0167523	0.154367	AT3G02150;AT5G08070;AT5G60970	TCP13;TCP17;TCP5	a chloroplast trans-acting factor of the psbD light-responsive promoter.TCP gene involved in heterochronic control of leaf differentiation.;TCP gene involved in heterochronic control of leaf differentiation.;TCP gene involved in heterochronic control of leaf differentiation. Transcription factor which controls thermomorphogenesis by positively regulating PIF4 activity.
TraesCS1A02G332800	C1	0.210459	0.00719372	0.00828733	0.0638201	0.0235713	AT3G22910;AT3G63380	ACA13;ACA12	ATPase E1-E2 type family protein / haloacid dehalogenase-like hydrolase family protein;(source:Araport11);ATPase E1-E2 type family protein / haloacid dehalogenase-like hydrolase family protein;(source:Araport11)
TraesCS1A02G334800	C1	3.53928	0.0594828	0.015662	0	0	NA	NA	NA
TraesCS1A02G334900	C1	11.5659	11.2445	5.2835	3.41101	4.35617	AT2G33860	ARF3	ettin (ett) mutations have pleiotropic effects on Arabidopsis flower development, causing increases in perianth organ number, decreases in stamen number and anther formation, and apical-basal patterning defects in the gynoecium. The ETTIN gene encodes a protein with homology to DNA binding proteins which bind to auxin response elements. ETT transcript is expressed throughout stage 1 floral merist…
TraesCS1A02G335100	C1	0.167871	0	0	0	0	NA	NA	NA
TraesCS1A02G337900	C1	1.54392	0	0	0	0.0948631	NA	NA	NA
TraesCS1A02G338100	C1	0.935253	0.384857	0.0281977	0.0984047	0.505636	NA	NA	NA
TraesCS1A02G338200	C1	24.1191	2.25925	4.6124	13.613	14.5499	AT1G06410	TPS7	Encodes an enzyme putatively involved in trehalose biosynthesis. Though the protein has both trehalose-6-phosphate synthase (TPS)-like and trehalose-6-phosphate phosphatase (TPP)-like domains, neither activity has been detected in enzymatic assays nor has the protein been able to complement yeast TPS or TPP mutants.
TraesCS1A02G339600	C1	4.69746	2.76323	2.59426	4.47713	4.0304	AT3G46930;AT5G58950	AT3G46930;AT5G58950	Encodes a Raf-Like Mitogen-Activated Protein Kinase Kinase Kinase Raf43. Required for tolerance to multiple abiotic stresses.;Protein kinase superfamily protein;(source:Araport11)
TraesCS1A02G340100	C1	198.567	0.713407	0.0101773	0.380108	0.518663	AT1G74310;AT4G14670;AT4G14675	CLPB1;CLPB2;AT4G14675	Encodes ClpB1, which belongs to the Casein lytic proteinase/heat shock protein 100 (Clp/Hsp100) family. Involved in refolding of proteins which form aggregates under heat stress. Also known as AtHsp101. AtHsp101 is a cytosolic heat shock protein required for acclimation to high temperature.;This locus was originally annotated as encoding ClpB2 (also referred to as Hsp92.7), which belongs to the C…
TraesCS1A02G340900	C1	19.1384	8.69362	5.30239	5.92906	7.05226	NA	NA	NA
TraesCS1A02G341300	C1	6.66062	0.488108	0.459672	1.70706	2.94043	AT5G23940	DCR	Encodes PERMEABLE LEAVES3 (PEL3), a putative acyl-transferase. Mutation in this locus results in altered trichome phenotype (trcichomes become tangled during leaf expansion). Additional phenotype includes altered cuticle layer.
TraesCS1A02G346500	C1	86.1609	43.0074	55.3269	6.79036	5.16777	AT5G07500	TZF6	Encodes an embryo-specific zinc finger transcription factor required for heart-stage embryo formation.
TraesCS1A02G346600	C1	3.26737	0	0.0218857	0	0.103476	NA	NA	NA
TraesCS1A02G346800	C1	106.957	86.09	58.0531	68.7325	68.4424	AT1G64090;AT2G46170;AT3G61560;AT4G01230;AT4G11220;AT4G23630;AT5G41600	RTNLB3;RTNLB5;RTNLB6;RTNLB7;RTNLB2;RTNLB1;RTNLB4	Reticulan like protein B3;(source:Araport11);Reticulon family protein;(source:Araport11);Reticulon family protein;(source:Araport11);Reticulon family protein. Mutants are resistant to agrobacterium infection.;VIRB2-interacting protein 2;(source:Araport11);VIRB2-interacting protein 1;(source:Araport11);VIRB2-interacting protein 3;(source:Araport11)
TraesCS1A02G346900	C1	4.4624	3.10845	2.24184	3.51306	3.46664	AT2G46160;AT3G61550	ATL67;ATL68	RING/U-box superfamily protein;(source:Araport11);RING/U-box superfamily protein;(source:Araport11)
TraesCS1A02G347200	C1	16.5522	10.7662	6.28118	8.39948	7.12349	NA	NA	NA
TraesCS1A02G350100	C1	2.57184	1.18079	1.45592	2.25329	2.22656	NA	NA	NA
TraesCS1A02G351300	C1	26.1413	10.8071	5.75722	9.08144	9.81789	NA	NA	NA
TraesCS1A02G351600	C1	12.7127	3.23604	0.797617	2.52327	2.06706	AT3G01900;AT3G48520;AT5G63450	CYP94B2;CYP94B3;CYP94B1	member of CYP94B;CYP94B3 is a jasmonoyl-isoleucine-12-hydroxylase that catalyzes the formation of 12-OH-JA-Ile from JA-Ile. By reducing the levels of this the biologically active phytohormone, CYP94B3 attenuates the jasmonic acid signaling cascade. CYP94B3 transcript levels rise in response to wounding.;AtWRKY33 regulates root apoplastic barrier formation by controlling AtCYP94B1 leading to incre…
TraesCS1A02G352000	C1	28.0132	15.4693	14.2985	18.6161	16.048	AT1G15280;AT1G80000	AT1G15280;MLN51	CASC3/Barentsz eIF4AIII binding protein;(source:Araport11);CASC3/Barentsz eIF4AIII binding protein;(source:Araport11)
TraesCS1A02G355500	C1	12.9212	7.7602	6.53919	8.12804	4.51074	AT1G28240;AT1G53040	AT1G28240;AT1G53040	strawberry notch protein (DUF616);(source:Araport11);tRNA (met) cytidine acetyltransferase, putative (DUF616);(source:Araport11)
TraesCS1A02G356700	C1	0.171848	0	0.0586298	0.166705	0.109783	NA	NA	NA
TraesCS1A02G358000	C1	4.42868	4.1768	2.85866	3.38394	2.43369	AT1G22740;AT2G21880;AT4G09720;AT5G39620	RABG3B;RABG2;ATRABG3A;RABG1	GTP-binding protein Rab7;RAB GTPase homolog 7A;(source:Araport11);RAB GTPase homolog G3A;(source:Araport11);RAB GTPase homolog G1;(source:Araport11)
TraesCS1A02G358400	C1	2.39597	0.68915	0.301138	1.02431	1.66278	AT5G26170	WRKY50	member of WRKY Transcription Factor; Group II-c. Involved in jasmonic acid inducible defense responses.
TraesCS1A02G358600	C1	19.2669	11.5683	16.6427	13.4874	11.7198	AT1G17550;AT1G72770	HAB2;HAB1	Protein Phosphatase 2C;mutant has ABA hypersensitive inhibition of seed germination; Protein Phosphatase 2C; regulates the activation of the Snf1-related kinase OST1 by abscisic acid. The mRNA is cell-to-cell mobile.
TraesCS1A02G359100	C1	29.6975	3.15235	1.0178	0.955198	1.89916	NA	NA	NA
TraesCS1A02G359900	C1	89.2942	33.8822	83.8981	55.176	50.317	NA	NA	NA
TraesCS1A02G360100	C1	93.5529	51.7275	82.7265	61.0099	51.4474	NA	NA	NA
TraesCS1A02G361000	C1	1.70246	1.29775	0.98842	1.30989	1.27921	AT5G11840	AT5G11840	YCF36, putative (DUF1230);(source:Araport11)
TraesCS1A02G361100	C1	23.1208	15.7248	10.2936	9.43714	9.14733	NA	NA	NA
TraesCS1A02G362100	C1	44.2228	5.62466	3.94491	13.4772	13.3233	NA	NA	NA
TraesCS1A02G362800	C1	3.86452	3.27605	1.12037	0.838945	0.964693	AT3G21330	BHLH87	basic helix-loop-helix (bHLH) DNA-binding superfamily protein;(source:Araport11)
TraesCS1A02G363000	C1	302.324	77.4043	154.539	130.876	135.234	NA	NA	NA
TraesCS1A02G363100	C1	17.8059	9.63919	9.06975	11.0105	9.16841	AT1G26670;AT3G29100;AT5G39510;AT5G39630	VTI12;VTI13;VTI11;AT5G39630	member of VTI1 Gene Family. Normally localizes to the transgolgi network and plasma membrane. A dominant mutation (zip1) alters the subcellular localization of VTI12 and suppresses loss of function mutation (zag1) of VTI11. Interacts with members of the SYP family. Involved in protein trafficking to protein storage vacuoles.;Encodes a member of the Arabidopsis v-SNARE (vesicle soluble NSF attachm…
TraesCS1A02G364000	C1	1320.47	833.198	665.673	231.535	115.473	NA	NA	NA
TraesCS1A02G365200	C1	1.13742	0	0	0.0338872	0.0175717	NA	NA	NA
TraesCS1A02G365300	C1	2.60509	0.0311053	0.0359509	0.352329	0.0676525	NA	NA	NA
TraesCS1A02G366400	C1	25.7222	19.509	20.4501	17.9994	13.7565	AT2G21510;AT4G39150	AT2G21510;AT4G39150	DNAJ heat shock N-terminal domain-containing protein;(source:Araport11);DNAJ heat shock N-terminal domain-containing protein;(source:Araport11)
TraesCS1A02G366500	C1	4.5368	1.84012	0.922785	1.87174	1.7781	AT1G64900;AT1G64930;AT1G64940;AT1G64950;AT2G12190;AT3G03470;AT5G61320	CYP89A2;CYP89A7;CYP89A6;CYP89A5;AT2G12190;CYP89A9;CYP89A3	Encodes cytochrome P450 (CYP89A2). The mRNA is cell-to-cell mobile.;member of CYP89A;member of CYP89A;member of CYP89A The mRNA is cell-to-cell mobile.;Cytochrome P450 superfamily protein;(source:Araport11);P450 monooxygenase CYP89A9. Involved in NDCC accumulation during Arabidopsis leaf senescence.;member of CYP89A
TraesCS1A02G366700	C1	3.09851	1.9541	0.861054	1.69563	1.24452	AT1G19650;AT1G75370;AT2G21520;AT4G39170	SFH4;AT1G75370;AT2G21520;SFH6	Sec14p-like phosphatidylinositol transfer family protein;(source:Araport11);Sec14p-like phosphatidylinositol transfer family protein;(source:Araport11);Sec14p-like phosphatidylinositol transfer family protein;(source:Araport11);Sec14p-like phosphatidylinositol transfer family protein;(source:Araport11)
TraesCS1A02G366900	C1	9.09045	0.476313	0.856974	0.491066	0.49352	AT1G05100;AT2G32510;AT4G26890;AT5G55090	MAPKKK18;MAPKKK17;MAPKKK16;MAPKKK15	member of MEKK subfamily. Negatively regulated by RGLG1 and RGLG2; involved in drought stress tolerance.;Member of MEKK subfamily involved in wound and JA induced signaling.Interacts with At5g40440, and activates At1g59580.;Member of MEKK subfamily. Involved in wound response signaling. Interacts with At5g40440, and activates At1g59580.;member of MEKK subfamily
TraesCS1A02G367000	C1	3.80815	0.472028	0.117997	0.833492	0.937039	AT1G05100;AT2G32510;AT4G26890;AT5G55090	MAPKKK18;MAPKKK17;MAPKKK16;MAPKKK15	member of MEKK subfamily. Negatively regulated by RGLG1 and RGLG2; involved in drought stress tolerance.;Member of MEKK subfamily involved in wound and JA induced signaling.Interacts with At5g40440, and activates At1g59580.;Member of MEKK subfamily. Involved in wound response signaling. Interacts with At5g40440, and activates At1g59580.;member of MEKK subfamily
TraesCS1A02G367100	C1	3.62019	0.0208984	0	0.154174	0.219481	AT1G05100;AT2G32510;AT4G26890;AT5G55090	MAPKKK18;MAPKKK17;MAPKKK16;MAPKKK15	member of MEKK subfamily. Negatively regulated by RGLG1 and RGLG2; involved in drought stress tolerance.;Member of MEKK subfamily involved in wound and JA induced signaling.Interacts with At5g40440, and activates At1g59580.;Member of MEKK subfamily. Involved in wound response signaling. Interacts with At5g40440, and activates At1g59580.;member of MEKK subfamily
TraesCS1A02G367200	C1	1.50273	0.0332611	0	0	0.0515153	AT1G05100;AT2G32510;AT4G26890;AT5G55090	MAPKKK18;MAPKKK17;MAPKKK16;MAPKKK15	member of MEKK subfamily. Negatively regulated by RGLG1 and RGLG2; involved in drought stress tolerance.;Member of MEKK subfamily involved in wound and JA induced signaling.Interacts with At5g40440, and activates At1g59580.;Member of MEKK subfamily. Involved in wound response signaling. Interacts with At5g40440, and activates At1g59580.;member of MEKK subfamily
TraesCS1A02G367900	C1	1073.42	308.751	821.935	704.171	724.127	AT1G07790;AT2G28720;AT2G37470;AT3G09480;AT3G45980;AT3G46030;AT3G53650;AT5G02570;AT5G22880;AT5G59910	HTB1;AT2G28720;AT2G37470;AT3G09480;H2B;HTB11;AT3G53650;AT5G02570;H2B;HTB4	Encodes a histone 2B (H2B) protein.;Histone superfamily protein;(source:Araport11);Histone superfamily protein;(source:Araport11);Histone superfamily protein;(source:Araport11);Encodes a histone 2B (H2B) protein. This protein can be ubiquitinated in planta, and this modification depends on the HUB1 and HUB2 E3 ubiquitin ligases as well as the UBC1 and UBC2 E2 ubiquitin conjugating enzymes. Lysine…
TraesCS1A02G369600	C1	58.3997	17.9036	4.87254	13.5828	5.0745	AT1G48600;AT1G73600;AT3G18000	NMT2;AT1G73600;NMT1	Encodes a phosphoethanolamine N-methyltransferase that catalyses the last two methylation steps of the three sequential methylations of phosphoethanolamine (PEA) that are required for the synthesis of phosphocholine (PCho) in plants.;Encodes a S-adenosyl-L-methionine-dependent phosphoethanolamine N-methyltransferase whose expression is responsive to both phosphate (Pi) and phosphite (Phi) in root…
TraesCS1A02G369700	C1	30.8623	20.14	18.6577	23.8619	17.7338	AT1G14910;AT2G01600	AT1G14910;AT2G01600	ANTH domain-containing protein which functions as adaptor protein for clathrin-mediated endocytosis (CME) of the secretory vesicle-associated longintype R-SNARE VAMP72 group. Interacts with the SNARE domain of VAMP72 and clathrin at the plasma membrane. Required for recycling of R-SNARE proteins.;ANTH domain-containing protein which functions as adaptor protein for clathrin-mediated endocytosis (…
TraesCS1A02G370400	C1	29.7851	0.0197626	0	0	0	NA	NA	NA
TraesCS1A02G370600	C1	112.823	0.131617	0.0718858	0.0255347	0.320184	NA	NA	NA
TraesCS1A02G370700	C1	34.0415	0.0805355	0.020493	0.17107	0.102155	NA	NA	NA
TraesCS1A02G374300	C1	3.93586	0.637497	0	0	0	NA	NA	NA
TraesCS1A02G374400	C1	0.831808	0	0.09798	0	0	NA	NA	NA
TraesCS1A02G374500	C1	2.14175	0.191932	0	0.0958984	0.0967453	NA	NA	NA
TraesCS1A02G375600	C1	269.72	12.7325	7.03089	29.2663	19.5261	AT3G22830;AT3G51910;AT3G63350;AT5G43840	HSFA6B;HSFA7A;HSFA7B;HSFA6A	member of Heat Stress Transcription Factor (Hsf) family;member of Heat Stress Transcription Factor (Hsf) family The mRNA is cell-to-cell mobile.;member of Heat Stress Transcription Factor (Hsf) family;member of Heat Stress Transcription Factor (Hsf) family
TraesCS1A02G376300	C1	9.09561	1.42436	2.55408	1.93315	2.05779	AT1G25410;AT1G68460;AT3G19160;AT4G24650	IPT6;IPT1;IPT8;IPT4	AB061404 Arabidopsis thaliana AtIPT6 mRNA for cytokinin synthase, complete cds;Encodes a putative adenylate isopentenyltransferase. It catalyzes the formation of isopentenyladenosine 5'-monophosphate (iPMP) from AMP and dimethylallylpyrophosphate (DMAPP), but it has a lower Km for ADP and likely works using ADP or ATP in plants. It is involved in cytokinin biosynthesis.;Encodes cytokinin synthase…
TraesCS1A02G378500	C1	5.57102	0.14415	0	0.0358974	0.272216	NA	NA	NA
TraesCS1A02G378900	C1	1.99486	0.261957	1.45607	1.29356	1.01966	AT5G51600	MAP65-3	Mutant has defective roots. Essential for giant cell ontogenesis. Role in organizing the mitotic microtubule array during both early and late mitosis in all plant organs.
TraesCS1A02G380300	C1	2.34063	0.59077	1.03399	1.19677	0.563652	NA	NA	NA
TraesCS1A02G381400	C1	235.063	9.39148	3.6977	4.30337	2.76934	NA	NA	NA
TraesCS1A02G383200	C1	8.24721	0.525016	0.0959342	0.138725	0.0320377	AT4G32590	AT4G32590	2Fe-2S ferredoxin-like superfamily protein;(source:Araport11)
TraesCS1A02G386000	C1	0.8503	0	0	0.0638924	0.15988	AT1G30840	PUP4	Member of a family of proteins related to PUP1, a purine transporter. May be involved in the transport of purine and purine derivatives such as cytokinins, across the plasma membrane.
TraesCS1A02G387600	C1	0.204243	0.0530272	0.0286915	0.0275933	0.0263604	NA	NA	NA
TraesCS1A02G388800	C1	2.7885	1.65008	2.48735	2.16756	1.61185	AT1G34200;AT4G09670	AT1G34200;AT4G09670	Glyceraldehyde-3-phosphate dehydrogenase-like family protein;(source:Araport11);Oxidoreductase family protein;(source:Araport11)
TraesCS1A02G389900	C1	0.34723	0.0706147	0.250183	0.0463338	0.309298	AT5G11550	AT5G11550	ARM repeat superfamily protein;(source:Araport11)
TraesCS1A02G390400	C1	4.27994	2.04038	1.81966	2.37836	3.11711	AT3G07310;AT5G48590	AT3G07310;AT5G48590	phosphoserine aminotransferase, putative (DUF760);(source:Araport11);phosphoserine aminotransferase, putative (DUF760);(source:Araport11)
TraesCS1A02G391100	C1	0.526348	0.0197363	0	0	0	NA	NA	NA
TraesCS1A02G392300	C1	8.02825	6.24955	5.6012	6.25258	6.06909	NA	NA	NA
TraesCS1A02G394400	C1	7.31408	3.17571	4.64254	5.69249	6.07034	AT4G28300	AT4G28300	Encodes a protein with 13.6% proline amino acids that is predicted to localize to the cell wall. The mRNA is cell-to-cell mobile.
TraesCS1A02G395300	C1	382.306	20.6127	12.7875	31.1409	31.8902	NA	NA	NA
TraesCS1A02G396200	C1	0.599724	0.4309	0.125622	0.128642	0.140489	NA	NA	NA
TraesCS1A02G396700	C1	4.52619	0.882632	0.564943	3.72768	3.03921	AT1G03870;AT2G20520;AT5G44130	FLA9;FLA6;FLA13	fasciclin-like arabinogalactan-protein 9 (Fla9). Possibly involved in embryogenesis and seed development.;fasciclin-like arabinogalactan-protein 6 (Fla6). Possibly involved in embryogenesis and seed development.;Fasciclin-like arabinogalactan protein. Possibly involved in embryogenesis and seed development.
TraesCS1A02G396800	C1	49.9486	20.8778	21.5068	29.9258	17.6217	AT1G03870;AT2G20520;AT5G44130	FLA9;FLA6;FLA13	fasciclin-like arabinogalactan-protein 9 (Fla9). Possibly involved in embryogenesis and seed development.;fasciclin-like arabinogalactan-protein 6 (Fla6). Possibly involved in embryogenesis and seed development.;Fasciclin-like arabinogalactan protein. Possibly involved in embryogenesis and seed development.
TraesCS1A02G396900	C1	47.3485	2.00744	1.81335	3.41981	2.8719	AT1G28480	GRXC9	Encodes GRX480, a member of the glutaredoxin family that regulates protein redox state. GRX480 interacts with TGA factors and suppresses JA-responsive PDF1.2 transcription. GRX480 transcription is SA-inducible and requires NPR1. Maybe involved in SA/JA cross-talk. It has also been shown to interact with the transcription factor TGA2 and suppress ORA59 promoter activity.
TraesCS1A02G397200	C1	1.20466	0.222762	0.245625	0	0	AT1G28480	GRXC9	Encodes GRX480, a member of the glutaredoxin family that regulates protein redox state. GRX480 interacts with TGA factors and suppresses JA-responsive PDF1.2 transcription. GRX480 transcription is SA-inducible and requires NPR1. Maybe involved in SA/JA cross-talk. It has also been shown to interact with the transcription factor TGA2 and suppress ORA59 promoter activity.
TraesCS1A02G398300	C1	7.60128	1.76157	1.64092	1.76246	0.940005	AT1G53190;AT3G15070	AT1G53190;AT3G15070	Encodes a RING-type E3 ligase that positively regulates CIN-like TCP activity to promote leaf development by mediating the degradation of the TCP repressor TIE1.;Encodes a RING-type E3 ligase that positively regulates CIN-like TCP activity to promote leaf development by mediating the degradation of the TCP repressor TIE1.
TraesCS1A02G402100	C1	1.94137	0.970653	1.417	1.43975	1.58451	AT5G46420	AT5G46420	16S rRNA processing protein RimM family;(source:Araport11)
TraesCS1A02G402400	C1	16.5147	5.65626	5.16886	8.44773	6.30861	NA	NA	NA
TraesCS1A02G403300	C1	0.432197	0	0	0	0.0365034	AT1G29910;AT1G29920;AT1G29930;AT2G34420;AT2G34430	LHCB1.1;LHCB1.1;LHCB1.3;LHB1B2;LHB1B1	member of Chlorophyll a/b-binding protein family;Encodes lhcb1.1 a component of the LHCIIb light harvesting complex associated with photosystem II.;Subunit of light-harvesting complex II (LHCII),which absorbs light and transfers energy to the photosynthetic reaction center. The mRNA is cell-to-cell mobile.;Photosystem II type I chlorophyll a/b-binding protein;Photosystem II type I chlorophyll a/b…
TraesCS1A02G404800	C1	7.18552	0	0	0	0	NA	NA	NA
TraesCS1A02G404900	C1	45.0022	2.44282	0.0496431	0	0	NA	NA	NA
TraesCS1A02G405100	C1	1.38393	0	0	0	0	NA	NA	NA
TraesCS1A02G406200	C1	5.21718	5.02776	3.45096	2.46542	1.99492	AT1G19440;AT2G15090;AT2G16280;AT4G34250;AT4G34510;AT4G34520	KCS4;KCS8;KCS9;KCS16;KCS17;FAE1	Encodes KCS4, a member of the 3-ketoacyl-CoA synthase family involved in the biosynthesis of VLCFA (very long chain fatty acids).;Encodes KCS8, a member of the 3-ketoacyl-CoA synthase family involved in the biosynthesis of VLCFA (very long chain fatty acids). The mRNA is cell-to-cell mobile.;Encodes KCS9, a member of the 3-ketoacyl-CoA synthase family involved in the biosynthesis of VLCFA (very l…
TraesCS1A02G407600	C1	0.611007	0.127236	0.098783	0.564165	0.421138	AT1G57770	AT1G57770	FAD/NAD(P)-binding oxidoreductase family protein;(source:Araport11)
TraesCS1A02G408100	C1	3.48783	0.434483	0.0557472	0.122978	0.168042	NA	NA	NA
TraesCS1A02G408200	C1	1.51901	0.933394	0.211675	0.249074	0.145521	NA	NA	NA
TraesCS1A02G408900	C1	6.13901	1.97693	1.14464	2.1581	1.82071	AT3G27925	DEGP1	Encodes a DegP protease; nuclear gene encoding chloroplast-targeted protease that can degrade two lumenal proteins, plastocyanin and OE33, suggesting a role as a general-purpose protease in the thylakoid lumen. Involved in the degradation of D1 protein of PS II, hence participating in the repair of PS II damages caused by photoinhibition. The mRNA is cell-to-cell mobile.
TraesCS1A02G410500	C1	2.84355	0.681314	0.370584	0.825194	2.50954	AT2G46400	WRKY46	Encodes a WRKY transcription factor that contributes to the feedforward inhibition of osmotic/salt stress-dependent LR inhibition via regulation of ABA signaling and auxin homeostasis.
TraesCS1A02G410600	C1	0.556467	0.0377517	0.133078	0	0.328433	NA	NA	NA
TraesCS1A02G410700	C1	25.2352	0.106862	0.465072	0.691027	1.89976	AT2G46400	WRKY46	Encodes a WRKY transcription factor that contributes to the feedforward inhibition of osmotic/salt stress-dependent LR inhibition via regulation of ABA signaling and auxin homeostasis.
TraesCS1A02G411700	C1	13.0367	6.8774	8.82107	10.0421	10.2479	AT2G37060;AT2G38880;AT3G53340	NFYB8;NF-YB1;NFYB10	nuclear factor Y, subunit B8;(source:Araport11);Encodes a transcription factor from the nuclear factor Y (NF-Y) family, AtNF-YB1. Confers drought tolerance.;nuclear factor Y, subunit B10;(source:Araport11)
TraesCS1A02G412400	C1	0.395908	0	0	0.0197399	0.0179301	NA	NA	NA
TraesCS1A02G413700	C1	6.46174	1.36371	0.609378	1.10033	0.438993	NA	NA	NA
TraesCS1A02G414400	C1	1.26372	0.445198	0.292979	0.396428	0.149914	AT1G66810	AT1G66810	Encodes a tandem CCCH zinc finger (TZF) protein that can bind DNA and RNA, function as a transcriptional activator, and is involved in secondary wall biosynthesis.
TraesCS1A02G415100	C1	155.785	39.4751	60.6735	12.7574	6.03456	NA	NA	NA
TraesCS1A02G416100	C1	14.9106	2.10539	1.37397	2.3106	3.36401	AT1G18530;AT3G25600	CML15;CML16	Calmodulin like protein. Paralog of CML16. Expression in flowers is restricted to anthers and mature pollen.;Calmodulin like protein. Paralog of CML15.
TraesCS1A02G416700	C1	972.49	17.1144	4.27413	27.011	39.8145	AT3G10020	AT3G10020	plant/protein;(source:Araport11)
TraesCS1A02G417800	C1	15.9253	1.46583	1.0969	1.80369	3.72986	AT5G14700	AT5G14700	NAD(P)-binding Rossmann-fold superfamily protein;(source:Araport11)
TraesCS1A02G424500	C1	14.8868	0.0419877	0.0596008	2.21192	2.14188	AT4G27970	SLAH2	Encodes a protein with ten predicted transmembrane helices. The SLAH2 protein has similarity to the SLAC1 protein involved in ion homeostasis in guard cells. But, it is not expressed in guard cells and cannot complement a slac1-2 mutant suggesting that it performs a different function. SLAH2:GFP localizes to the plasma membrane.
TraesCS1A02G425100	C1	6.15765	3.71795	2.12108	1.70192	1.73436	AT2G46370	JAR1	Encodes a jasmonate-amido synthetase that is a member of the GH3 family of proteins. JAR1 catalyzes the formation of a biologically active jasmonyl-isoleucine (JA-Ile) conjugate. JA-Ile promotes the interaction between JAZ1 and COI1 in the jasmonate signaling pathway. JAR1 localizes to the cytoplasm and is also a phytochrome A signaling component. JAR1 is an auxin-induced gene. Loss of function m…
TraesCS1A02G425200	C1	10.3466	4.14974	5.28446	4.81325	4.66405	AT1G01440;AT2G46380;AT3G61670;AT4G01090	AT1G01440;AT2G46380;AT3G61670;AT4G01090	hypothetical protein (DUF3133);(source:Araport11);extra-large G-like protein, putative (DUF3133);(source:Araport11);extra-large G-like protein, putative (DUF3133);(source:Araport11);Hypothetical protein; participates in wound-induced lateral root development.
TraesCS1A02G426800	C1	42.8556	32.4965	32.4271	5.10453	3.25959	NA	NA	NA
TraesCS1A02G427400	C1	9.53842	4.26305	5.9548	6.95006	4.79748	AT1G53300;AT2G42580;AT3G14950;AT3G58620	TTL1;TTL3;TTL2;TTL4	Encodes one of the 36 carboxylate clamp (CC)-tetratricopeptide repeat (TPR) proteins (Prasad 2010, Pubmed ID: 20856808) with potential to interact with Hsp90/Hsp70 as co-chaperones. The TTL family is required for osmotic stress tolerance and male sporogenesis. The mRNA is cell-to-cell mobile.;Encodes a member of the TTL family and contains a thioredoxin like domain and three tandom TPRs. Interact…
TraesCS1A02G433100	C1	2.53838	0.958518	1.31824	0.887694	1.25594	AT1G55200;AT3G13690;AT5G56790	AT1G55200;AT3G13690;AT5G56790	kinase with adenine nucleotide alpha hydrolases-like domain-containing protein;(source:Araport11);kinase with adenine nucleotide alpha hydrolases-like domain-containing protein;(source:Araport11);Protein kinase superfamily protein;(source:Araport11)
TraesCS1A02G436500	C1	2.61408	0.87972	0.622575	0.735247	1.16137	NA	NA	NA
TraesCS1A02G436600	C1	41.4235	1.09051	0.0240695	0.0466404	0.0482991	NA	NA	NA
TraesCS1A02G437600	C1	20.2293	13.2391	6.9073	12.0157	8.44577	AT5G15120;AT5G39890	PCO1;PCO2	2-aminoethanethiol dioxygenase, putative (DUF1637);(source:Araport11);Plant Cysteine Oxidase (PCO). Involved in controlling the stability of Group VII ethylene response factors (ERF-VIIs) via N-Arg/degron pathway through catalyzing the oxidation of their N-Cys for subsequent Arginyl-tRNA--protein transferase 1 (ATE1) mediated arginine installation.
TraesCS1B02G001800	C1	5.87349	5.54906	4.33228	5.98005	4.7705	AT1G13210;AT1G26130;AT1G68710;AT3G25610	ALA11;AT1G26130;AT1G68710;ALA10	Autoinhibited Ca2+/ATPase II. ALA11 acts redundantly with ALA3, ALA4, ALA5, ALA9, ALA10 in root and shoot development as well as PIN trafficking and polarity .;ATPase E1-E2 type family protein / haloacid dehalogenase-like hydrolase family protein;(source:Araport11);ATPase E1-E2 type family protein / haloacid dehalogenase-like hydrolase family protein;(source:Araport11);Encodes aminophospholipid A…
TraesCS1B02G008200	C1	13.2501	10.1579	7.74443	10.3801	8.42339	AT3G10640;AT5G04850	VPS60.1;VPS60.2	SNF7 family protein;(source:Araport11);SNF7 family protein;(source:Araport11)
TraesCS1B02G010400	C1	0.35547	0	0	0	0	NA	NA	NA
TraesCS1B02G010800	C1	0.376912	0	0	0	0	NA	NA	NA
TraesCS1B02G011000	C1	0.473624	0	0	0	0	NA	NA	NA
TraesCS1B02G011600	C1	0.228591	0	0	0	0	NA	NA	NA
TraesCS1B02G011700	C1	0.342778	0	0	0	0	NA	NA	NA
TraesCS1B02G013900	C1	18.3258	12.4505	13.9559	15.1422	13.3268	NA	NA	NA
TraesCS1B02G018100	C1	14.1192	6.16164	5.60871	0.230948	0.0862515	NA	NA	NA
TraesCS1B02G024900	C1	0.626628	0	0	0.0561371	0.133158	AT3G29590;AT3G29635;AT3G29636;AT3G29670;AT3G29680;AT3G29690;AT3G29720;AT5G39050;AT5G39080;AT5G39090;AT5G61160	5MAT;AT3G29635;AT3G29636;PMAT2;AT3G29680;AT3G29690;AT3G29720;PMAT1;AT5G39080;AT5G39090;ACT	At3g29590 (At5MAT) encodes a malonyl-CoA:anthocyanidin 5-O-glucoside-6"-O-malonyltransferase that is coordinately expressed with a epistatic 5-O-anthocyanidin glucosyltransferase (At4g14090). The enzyme is involved in the malonylation of anthocyanins in Arabidopsis.;HXXXD-type acyl-transferase family protein;(source:Araport11);transferase-like protein;(source:Araport11);Encodes a malonyltransfera…
TraesCS1B02G025500	C1	0.403671	0.0503337	0.108502	0.240692	0.243992	NA	NA	NA
TraesCS1B02G029100	C1	6.09324	4.206	3.40577	4.55039	3.85326	AT5G22450	AT5G22450	SAGA complex subunit. Regulates gene expression by affecting histone H3 acetylation.
TraesCS1B02G032400	C1	0.426394	0.183782	0.0890831	0.360693	0.238934	NA	NA	NA
TraesCS1B02G035100	C1	61.961	5.52627	1.62481	0.194509	0.903543	NA	NA	NA
TraesCS1B02G036900	C1	6.87767	1.01855	0.614829	1.80508	2.28186	NA	NA	NA
TraesCS1B02G037100	C1	15.4534	11.6217	7.7181	9.03032	8.86151	AT2G37660	AT2G37660	NAD(P)-binding Rossmann-fold superfamily protein;(source:Araport11)
TraesCS1B02G037700	C1	9.21875	9.21192	6.85767	9.00106	6.80123	AT2G29020;AT5G59410	AT2G29020;AT5G59410	Rab5-interacting family protein;(source:Araport11);Rab5-interacting family protein;(source:Araport11)
TraesCS1B02G041300	C1	19.9274	12.4542	11.0947	12.4943	11.9279	AT1G15850;AT1G80670	AT1G15850;RAE1	Transducin/WD40 repeat-like superfamily protein;(source:Araport11);This gene is predicted to encode a protein with a DWD motif. It can bind to DDB1a in Y2H assays, and may be involved in the formation of a CUL4-based E3 ubiquitin ligase
TraesCS1B02G041400	C1	4.06414	0.243954	0.134533	0.258367	0.279646	AT2G41640;AT3G10320;AT3G57380	AT2G41640;AT3G10320;AT3G57380	Glycosyltransferase family 61 protein;(source:Araport11);MUCI21 is a GT61 protein required for the production of highly branched xylan in seed coat mucilage. MUCI21 likely decorates xylan with xylose side chains that seem to be necessary for pectin attachment to the seed surface.;Glycosyltransferase family 61 protein;(source:Araport11)
TraesCS1B02G042100	C1	2.05837	0.0828404	0.220468	0.177583	0.276234	AT1G07630;AT2G28890	PLL5;PLL4	Encodes a protein phosphatase 2C like gene, similar to POL. Involved in leaf development. Knockout mutants have abnormally shaped leaves.;Encodes a protein phosphatase 2C like gene, similar to POL. Involved in leaf development. Knockout mutants have abnormally shaped leaves.
TraesCS1B02G042200	C1	5293.62	639.176	307.704	624.351	552.714	NA	NA	NA
TraesCS1B02G042300	C1	59.469	17.6385	16.2006	26.817	27.386	AT2G28900	OEP161	Encodes AtOEP16, a 16-KDa plastid outer membrane protein involved in plastid import of protochlorophyllide oxidoreductase A. Predominantly expressed in leaves and is also inducible by cold treatment.
TraesCS1B02G044200	C1	5.9451	0.488083	0.552307	1.06982	1.87205	NA	NA	NA
TraesCS1B02G044300	C1	3.94842	3.19333	2.95269	3.15856	3.62384	NA	NA	NA
TraesCS1B02G045000	C1	3.20774	0.689687	0.0595562	0.0964123	0.484339	AT1G07640;AT2G28810;AT2G37590;AT3G55370	OBP2;DOF2.2;DOF2.4;OBP3	A member of the DOF transcription factors. Prominently expressed in the phloem of leaves and other organs. Expression is induced by wounding, MeJA and insect feeding. Upregulates glucosinolate biosynthesis. PEAR protein involved in the formation of a short-range concentration gradient that peaks at protophloem sieve elements, and activates gene expression that promotes radial growth. Locally prom…
TraesCS1B02G046300	C1	7.17347	3.95911	2.84936	2.98795	4.1034	AT2G39570	ACR9	Encodes a ACT domain-containing protein. The ACT domain, named after bacterial aspartate kinase, chorismate mutase and TyrA (prephenate dehydrogenase), is a regulatory domain that serves as an amino acid-binding site in feedback-regulated amino acid metabolic enzymes.
TraesCS1B02G047000	C1	7.1925	2.13903	4.19165	5.17155	4.73353	NA	NA	NA
TraesCS1B02G047600	C1	62.9863	31.2845	27.8528	5.418	1.98492	NA	NA	NA
TraesCS1B02G047900	C1	0.326905	0.0665688	0.0642951	0.0882251	0.0198494	AT3G53720	CHX20	member of Putative Na+/H+ antiporter family. Involved in the osmoregulation through K(+) fluxes and possibly pH modulation of an active endomembrane system in guard cells.
TraesCS1B02G048900	C1	504.179	169.903	399.459	303.413	289.815	NA	NA	NA
TraesCS1B02G049100	C1	1123.73	402.848	931.192	752.862	781.711	NA	NA	NA
TraesCS1B02G054700	C1	0.636029	0.0244706	0.22061	0.383826	0.428485	NA	NA	NA
TraesCS1B02G059100	C1	189.956	87.6032	55.6661	65.0216	62.9958	AT1G19550;AT1G19570;AT1G75270	AT1G19550;DHAR1;DHAR2	Glutathione S-transferase family protein;(source:Araport11);Encodes a member of the dehydroascorbate reductase gene family. Critical for a mutualistic symbiosis between the host Arabidopsis and the root colonizing fungus Piriformospora indica.Encodes about 50-60% of extractable leaf GSH-dependent DHAR activity, but single knockout mutants show unaltered ascorbate and glutathione status in optimal…
TraesCS1B02G060200	C1	3.11962	2.96871	1.07667	3.57752	1.94721	NA	NA	NA
TraesCS1B02G060700	C1	25.6107	20.4435	17.4624	21.3129	13.1104	AT1G07670;AT1G07810	ECA4;ECA1	TPLATE complex protein involved in clathrin-mediated endocytosis.;Encodes an ER-type Ca2+-pumping ATPase. The mRNA is cell-to-cell mobile.
TraesCS1B02G064600	C1	4.08194	1.95475	0.749795	0.80384	0.728627	NA	NA	NA
TraesCS1B02G065000	C1	9.8312	4.00602	1.49871	1.51362	1.88604	NA	NA	NA
TraesCS1B02G065900	C1	25.6265	23.2017	16.3412	25.3951	19.8183	NA	NA	NA
TraesCS1B02G066000	C1	0.833383	0.520979	0.284013	0	0.04904	AT2G37360;AT2G39350;AT3G53510;AT3G55090;AT3G55100;AT3G55110;AT3G55130;AT5G13580	ABCG2;ABCG1;ABCG20;ABCG16;ABCG17;ABCG18;ABCG19;ABCG6	Belongs to a clade of five Arabidopsis thaliana ABCG half-transporters that are required for synthesis of an effective suberin barrier in roots and seed coats (ABCG2, ABCG6, and ABCG20) and for synthesis of an intact pollen wall (ABCG1 and ABCG16).;Belongs to a clade of five Arabidopsis thaliana ABCG half-transporters that are required for synthesis of an effective suberin barrier in roots and se…
TraesCS1B02G068500	C1	110.773	58.9854	84.9301	90.9721	86.6126	NA	NA	NA
TraesCS1B02G073900	C1	16.095	1.73168	0.804008	2.12	2.13202	NA	NA	NA
TraesCS1B02G074100	C1	3.47696	0.168279	0	0.368492	0.832508	NA	NA	NA
TraesCS1B02G076100	C1	193.165	19.9629	3.34228	11.3247	6.81718	NA	NA	NA
TraesCS1B02G080300	C1	30.7118	11.8045	14.2175	9.43882	5.11425	AT1G57550;AT2G38905	AT1G57550;AT2G38905	Low temperature and salt responsive protein family;(source:Araport11);Low temperature and salt responsive protein family;(source:Araport11)
TraesCS1B02G083100	C1	1.13826	1.04731	0.754457	1.06272	1.02295	AT1G16980;AT1G78580;AT4G27550	TPS2;TPS1;TPS4	Encodes an enzyme putatively involved in trehalose biosynthesis. The protein has a trehalose synthase (TPS)-like domain that may or may not be active but no trehalose phosphatase (TPP)-like domain.;Encodes an enzyme putatively involved in trehalose biosynthesis. The protein has a trehalose synthase (TPS)-like domain but no trehalose phosphatase (TPP)-like domain. ATTPS1 is able to complement yeas…
TraesCS1B02G084500	C1	13.1732	8.88519	7.71103	6.88256	6.50015	AT3G53380;AT5G03140	LECRK81;LECRK82	Concanavalin A-like lectin protein kinase family protein;(source:Araport11);Concanavalin A-like lectin protein kinase family protein;(source:Araport11)
TraesCS1B02G085000	C1	7.61548	2.08844	2.42458	6.29633	3.3816	NA	NA	NA
TraesCS1B02G086500	C1	1.88107	1.79487	1.03534	1.15383	1.41084	NA	NA	NA
TraesCS1B02G087200	C1	1.33169	0.195058	0.40704	0.56398	0.390542	NA	NA	NA
TraesCS1B02G088600	C1	4.2973	0.123117	0.0890056	0	0.0209758	AT2G38240;AT3G11180;AT3G55970;AT5G05600	ANS;AT3G11180;JRG21;AT5G05600	One of 4 paralogs encoding a 2-oxoglutarate/Fe(II)-dependent oxygenases that hydroxylates JA to 12-OH-JA.;One of 4 paralogs encoding a 2-oxoglutarate/Fe(II)-dependent oxygenases that hydroxylates JA to 12-OH-JA.;One of 4 paralogs encoding a 2-oxoglutarate/Fe(II)-dependent oxygenases that hydroxylates JA to 12-OH-JA.;Encodes a protein with similarity to flavonol synthases that is involved in the d…
TraesCS1B02G088900	C1	75.8976	14.5261	4.97451	13.4836	12.6271	NA	NA	NA
TraesCS1B02G089000	C1	30.5989	12.3511	1.72747	1.87075	1.55197	AT5G36160;AT5G53970	TAT;AT5G53970	Encodes a cytosolic L-tyrosine aminotransferase. AtTAT2 exhibits much broader amino donor specificity than AtTAT1 and can use not only Tyr but also Phe, Trp, His, Met, Leu, Ala, Ser, Cys, Asp, Asn, Gln, and Arg as amino donors.;Encodes a cytosolic tyrosine aminotransferase which is strongly induced upon aging and coronatine treatment. AtTAT1 prefers Tyr as an amino donor but can also use Phe, Trp…
TraesCS1B02G089100	C1	27.7109	2.88493	1.22912	1.17947	2.01419	NA	NA	NA
TraesCS1B02G090400	C1	14.8584	8.63756	7.22146	9.95359	12.3878	AT3G58810	MTPA2	Member of Zinc transporter (ZAT) family. Contributes to basic cellular Zn tolerance and controls Zn partitioning, particularly under conditions of high rates of Zn influx into the root symplasm. Localizes to the vacuolar membrane.
TraesCS1B02G093600	C1	2.69411	1.68293	1.115	2.48986	1.92241	AT2G47240;AT2G47245	LACS1;AT2G47245	Encodes an acyl-CoA synthetase that acts on long-chain and very-long-chain fatty acids, involved in cuticular wax and cutin biosynthesis The mRNA is cell-to-cell mobile.;long chain acyl-CoA synthetase;(source:Araport11)
TraesCS1B02G094500	C1	0.481936	0	0.0170562	0.119958	0.226831	AT2G47190;AT3G06490;AT5G49620	ATMYB2;MYB108;AtMYB78	Encodes a MYB transcription factor that possesses an R2R3 MYB DNA binding domain and is known to regulate the expression of salt- and dehydration-responsive genes. Has been shown to bind calmodulin.;Encodes a MYB transcription factor involved in regulating anther dehiscence as well as regulating cell death, and cuticle-related Botrytis immunity.;Member of the R2R3 factor gene family.
TraesCS1B02G095000	C1	4.57789	2.48446	0.276146	2.64812	3.16922	NA	NA	NA
TraesCS1B02G096200	C1	0.319391	0	0	0.209044	0.0813951	NA	NA	NA
TraesCS1B02G097200	C1	39.1755	3.91252	0.746851	1.42874	1.34818	AT3G03190;AT5G17220	GSTF11;GSTF12	Encodes glutathione transferase belonging to the phi class of GSTs. Naming convention according to Wagner et al. (2002).;Encodes glutathione transferase belonging to the phi class of GSTs. Naming convention according to Wagner et al. (2002). Mutants display no pigments on leaves and stems. Likely to function as a carrier to transport anthocyanin from the cytosol to tonoplasts.
TraesCS1B02G097300	C1	1.72689	1.79405	0.633056	0.814061	1.13823	AT1G27480	LCAT1	alpha/beta-Hydrolases superfamily protein;(source:Araport11)
TraesCS1B02G097400	C1	527.248	41.2403	6.55212	15.7613	12.2792	AT3G03190;AT5G17220	GSTF11;GSTF12	Encodes glutathione transferase belonging to the phi class of GSTs. Naming convention according to Wagner et al. (2002).;Encodes glutathione transferase belonging to the phi class of GSTs. Naming convention according to Wagner et al. (2002). Mutants display no pigments on leaves and stems. Likely to function as a carrier to transport anthocyanin from the cytosol to tonoplasts.
TraesCS1B02G097700	C1	36.6569	16.7914	14.0858	15.1817	12.2684	AT1G48210;AT1G48220;AT2G47060;AT3G17410;AT3G62220	AT1G48210;AT1G48220;AT2G47060;AT3G17410;AT3G62220	Protein kinase superfamily protein;(source:Araport11);Protein kinase superfamily protein;(source:Araport11);Encodes Pto-interacting 1-4 (PTI1-4), a member of the PTI1-like serine/threonine protein kinases that share strong sequence identity to the tomato PTI1 kinase.;Positively regulates ABA-mediated physiological responses via phosphorylation on RCAR3/ RCAR11.;Protein kinase superfamily protein;…
TraesCS1B02G098000	C1	3.04915	3.05663	0.0559456	0.251156	0.13328	AT1G02335;AT1G09560;AT3G05930;AT3G62020;AT5G26700	GL22;GLP4;GLP8;GLP10;AT5G26700	Encodes a plasodesmata-located protein involved in regulating primary root growth by controlling phloem-mediated allocation of resources between the primary and lateral root meristems.;Encodes a plasodesmata-located protein involved in regulating primary root growth by controlling phloem-mediated allocation of resources between the primary and lateral root meristems. The mRNA is cell-to-cell mobi…
TraesCS1B02G100400	C1	6.11594	1.01795	0.679678	1.2164	2.27296	AT2G43010;AT3G59060	PIF4;PIF5	Isolated as a semidominant mutation defective in red -light responses. Encodes a nuclear localized bHLH protein that interacts with active PhyB protein. Negatively regulates phyB mediated red light responses. Involved in shade avoidance response. Protein abundance is negatively regulated by PhyB.Involved in the regulation of response to nutrient levels. Controls the resistance to B. cinerea in a …
TraesCS1B02G100700	C1	0.497367	0	0	0.0917716	0.166715	AT2G46940;AT3G62070;AT4G01670	AT2G46940;AT3G62070;AT4G01670	fold protein;(source:Araport11);hypothetical protein;(source:Araport11);hypothetical protein;(source:Araport11)
TraesCS1B02G101100	C1	98.9356	10.6452	26.5266	2.98228	2.5915	AT1G54870;AT3G05260	AT1G54870;AT3G05260	ChlADR is an aldehyde reductase that catalyzes the reduction of the aldehyde carbonyl groups on saturated and alpha,beta-unsaturated aldehydes with more than 5 carbons in vitro. The N-terminal region of this protein directs GFP to the chloroplast where where ChlADR likely helps to maintain the photosynthetic process by detoxifying reactive carbonyls formed during lipid peroxidation. In addition, …
TraesCS1B02G102100	C1	1.22845	0.860706	0	0.211192	0.216039	NA	NA	NA
TraesCS1B02G104600	C1	7.38738	6.206	3.33188	5.07796	4.4653	NA	NA	NA
TraesCS1B02G105200	C1	12.1198	10.432	8.80571	9.08197	7.54811	AT4G03020	AT4G03020	transducin family protein / WD-40 repeat family protein;(source:Araport11)
TraesCS1B02G106400	C1	3.44582	1.24713	0.719941	0.851179	0.692023	AT5G66150	AT5G66150	Glycosyl hydrolase family 38 protein;(source:Araport11)
TraesCS1B02G108200	C1	5.4462	5.28729	4.70533	4.57383	4.03758	AT3G24440	VIL1	Encodes Vernalization Insensitive 3-like 1 (VIL1). VIL1 is involved in the photoperiod and vernalization of Arabidopsis by regulating expression of the related floral repressors Flowering Locus C (FLC) and Flowering Locus M (FLM). VIL1, along with VIN3 (Vernalization Insensitive 3) is necessary for the chromatin modification to FLC and FLM.
TraesCS1B02G109400	C1	2.24215	0.0152453	0.0148243	0.0163511	0.0724481	AT2G05940;AT5G35580	RIPK;AT5G35580	Encodes a receptor-like cytoplasmic kinase that phosphorylates the host target RIN4, leading to the activation of a plant innate immune receptor RPM1.;Protein kinase superfamily protein;(source:Araport11)
TraesCS1B02G115300	C1	8.16815	2.1592	3.49624	3.64616	3.52339	AT3G62720;AT4G02500	XXT1;XXT2	Encodes a protein with xylosyltransferase activity, which is specific for UDP-xylose as donor substrate and for oligosaccharides with a degree of polymerization >4. Although the enzyme utilizes either cellopentaose or cellohexaose, its activity is four-fold higher with cellohexaose as an acceptor compared to cellopentaose. The enzyme is able to add several xylosyl residues to the acceptor forming…
TraesCS1B02G116200	C1	18.1516	4.60735	8.75432	2.07416	0.938848	NA	NA	NA
TraesCS1B02G117400	C1	0.393585	0	0	0	0	NA	NA	NA
TraesCS1B02G117500	C1	8.10681	0.730561	0.779847	0.396337	0.994314	NA	NA	NA
TraesCS1B02G119300	C1	2.38671	1.63006	1.41945	0.829964	0.297313	AT1G11720	ATSS3	Encodes a starch synthase that in addition to its role in starch biosynthesis also has a negative regulatory function in the biosynthesis of transient starch. The protein apparently contains a starch-binding domain (SBD).
TraesCS1B02G119600	C1	3.65942	0.155626	0.270271	0.105661	0.419935	NA	NA	NA
TraesCS1B02G119700	C1	2.66175	0.0202062	0.0209957	0.0475818	0.126332	NA	NA	NA
TraesCS1B02G120100	C1	3.28661	0	0.139806	0.11888	0.022759	NA	NA	NA
TraesCS1B02G121200	C1	19.1426	7.06202	10.6308	4.21391	1.80897	AT2G47770	TSPO	Encodes a membrane-bound protein designated AtTSPO (Arabidopsis thaliana TSPO-related). AtTSPO is related to the bacterial outer membrane tryptophan-rich sensory protein (TspO) and the mammalian mitochondrial 18 kDa Translocator Protein (18 kDa TSPO), members of the TspO/MBR domain-containing membrane proteins. Mainly detected in dry seeds, but can be induced in vegetative tissues by osmotic or s…
TraesCS1B02G122800	C1	68.6942	0.915661	1.31504	2.76437	5.00179	AT2G37040;AT3G10340;AT3G53260;AT5G04230	PAL1;PAL4;PAL2;PAL3	Encodes PAL1, a phenylalanine ammonia-lyase. Arabidopsis has four PALs: AT2G37040 (PAL1), AT3G53260 (PAL2), AT5G04230 (PAL3) and AT3G10340 (PAL4).;Encodes PAL4, a putative a phenylalanine ammonia-lyase. Arabidopsis has four PALs: AT2G37040 (PAL1), AT3G53260 (PAL2), AT5G04230 (PAL3) and AT3G10340 (PAL4).;Encodes phenylalanine lyase. Arabidopsis has four PALs: AT2G37040 (PAL1), AT3G53260 (PAL2), AT…
TraesCS1B02G124100	C1	62.9656	19.0048	19.2738	12.1717	9.98994	AT3G17020	AT3G17020	Adenine nucleotide alpha hydrolases-like superfamily protein;(source:Araport11)
TraesCS1B02G124600	C1	19.2015	0.394075	0.264842	0	0	NA	NA	NA
TraesCS1B02G124900	C1	79.1614	34.8896	32.2469	29.7509	24.764	AT3G16950;AT4G16155	LPD1;LPD2	encodes a plastid lipoamide dehydrogenase, subunit of the pyruvate dehydrogenase complex which provides acetyl-CoA for de novo fatty acid biosynthesis. The gene is highly expressed in developing seeds.;dihydrolipoamide dehydrogenase;(source:Araport11)
TraesCS1B02G125400	C1	2.69491	0.885234	0.967667	1.60129	1.63669	AT1G52870;AT4G03410	AT1G52870;AT4G03410	Peroxisomal membrane 22 kDa (Mpv17/PMP22) family protein;(source:Araport11);Peroxisomal membrane 22 kDa (Mpv17/PMP22) family protein;(source:Araport11)
TraesCS1B02G125800	C1	3.02392	0.627115	0.843283	1.46866	1.04525	NA	NA	NA
TraesCS1B02G126900	C1	0.724078	0	0.0905941	0.444363	0.674507	NA	NA	NA
TraesCS1B02G128100	C1	12.1651	7.69764	9.16635	9.63578	7.82667	AT1G64040	TOPP3	Encodes the catalytic subunit of a Type 1 phosphoprotein Ser/Thr phosphatase, expressed in roots, shoots and flowers.
TraesCS1B02G129800	C1	65.7669	1.04304	0.575137	0.44758	1.41264	NA	NA	NA
TraesCS1B02G130300	C1	18.707	7.37923	4.42252	4.98642	4.08994	AT2G39360;AT3G46290;AT5G59700	AT2G39360;HERK1;AT5G59700	Protein kinase superfamily protein;(source:Araport11);Encodes HERCULES1 (HERK1), a receptor kinase regulated by Brassinosteroids and required for cell elongation during vegetative growth.;Protein kinase superfamily protein;(source:Araport11)
TraesCS1B02G130600	C1	0.787674	0.0916221	0.0334026	0.124421	0.0473019	NA	NA	NA
TraesCS1B02G131700	C1	34.2183	7.9718	3.35483	7.63113	4.33671	NA	NA	NA
TraesCS1B02G133200	C1	6.79754	1.87326	2.45566	3.66373	2.69218	NA	NA	NA
TraesCS1B02G133900	C1	1.68663	0.105961	0.0574543	0	0	AT1G23320;AT1G70560;AT4G24670	TAR1;TAA1;TAR2	Encodes a protein with similarity to the TAA1 trytophan aminotransferase involved in IAA biosynthesis. This gene appears to be expressed at a very low level during seedling development. Triple mutant analyses implicate this gene in embryonic development.;TAA1 is involved in the shade-induced production of indole-3-pyruvate (IPA), a precursor to IAA, a biologically active auxin. It is also involve…
TraesCS1B02G135300	C1	18.796	3.41317	4.6126	7.50924	4.34896	NA	NA	NA
TraesCS1B02G136600	C1	33.6703	27.5048	16.6051	14.748	15.3241	AT1G68680	AT1G68680	SH3/FCH domain protein;(source:Araport11)
TraesCS1B02G136700	C1	143.479	11.0727	18.4291	24.9142	33.9639	NA	NA	NA
TraesCS1B02G136800	C1	99.4343	1.54025	11.9899	6.73232	13.1533	NA	NA	NA
TraesCS1B02G137100	C1	1.70546	0.481399	0.916188	0.967187	1.12705	AT2G22740;AT2G35160	SUVH6;SUVH5	Encodes a SU(VAR)3-9 homolog, a methyltransferase involved in histone methylation. The protein was shown to bind to methylated cytosines of CG, CNG and CNN motifs but has a preference for the latter two. This is a member of a subfamily of SET proteins that shares a conserved SRA domain.;Encodes SU(var)3-9 homologue 5 (SUVH5). SUVH5 has histone methyltransferase (MTase) activity in vitro and contr…
TraesCS1B02G137300	C1	34.5461	1.34586	5.01211	2.8058	2.54191	AT1G15460;AT1G74810;AT4G32510;AT5G25430	BOR4;BOR5;AT4G32510;BOR6	Encodes a efflux-type boron transporter. Over-expression improved plant growth under B toxic conditions.;HCO3- transporter family;(source:Araport11);HCO3- transporter family;(source:Araport11);HCO3- transporter family;(source:Araport11)
TraesCS1B02G137600	C1	0.482597	0	0	0	0	NA	NA	NA
TraesCS1B02G138600	C1	4.66668	3.62127	1.43809	2.59964	1.53839	AT3G62160	AT3G62160	HXXXD-type acyl-transferase family protein;(source:Araport11)
TraesCS1B02G138800	C1	2.44413	0	0	0	0	AT3G24420	AT3G24420	DLK2 is a divergent member of the DWARF14 family. It's expression is dependent on D14 and KAI2 but it does not appear to play a role in stringolactone metabolism.
TraesCS1B02G139500	C1	118.048	35.5948	24.4167	36.0157	36.2844	AT1G79920;AT1G79930	AT1G79920;HSP70-14	Heat shock protein 70 (Hsp 70) family protein;(source:Araport11);encodes high molecular weight heat shock protein 70 not a HSP90 homolog, mRNA is constitutively expressed but transiently induced after heat shock
TraesCS1B02G139600	C1	79.2191	57.6086	69.9007	59.9698	53.713	AT1G79920;AT1G79930	AT1G79920;HSP70-14	Heat shock protein 70 (Hsp 70) family protein;(source:Araport11);encodes high molecular weight heat shock protein 70 not a HSP90 homolog, mRNA is constitutively expressed but transiently induced after heat shock
TraesCS1B02G140500	C1	0.444039	0.241047	0.0714674	0.276196	0.19474	AT1G77340;AT5G65560	AT1G77340;AT5G65560	Pentatricopeptide repeat (PPR) superfamily protein;(source:Araport11);Pentatricopeptide repeat (PPR) superfamily protein;(source:Araport11)
TraesCS1B02G141100	C1	0.445021	0.0394183	0.0679273	0.0439507	0.0405003	NA	NA	NA
TraesCS1B02G143100	C1	3.67695	3.32973	2.45095	2.8333	1.63589	AT2G25760	AT2G25760	Casein kinase involved in phosphorylation and ubiquination of RYR/PYLs, resulting in negative regulation of ABA response. Plays a role in repressing the transition from vegetative to reproductive phase.
TraesCS1B02G144700	C1	16.8251	10.9008	6.77247	13.1656	9.65378	AT1G17620;AT5G11890	AT1G17620;AT5G11890	Late embryogenesis abundant (LEA) hydroxyproline-rich glycoprotein family;(source:Araport11);harpin-induced protein;(source:Araport11)
TraesCS1B02G145400	C1	0.383072	0	0	0	0	AT2G42360	ATL41	RING/U-box superfamily protein;(source:Araport11)
TraesCS1B02G145600	C1	0.634959	0.0968299	0	0.0611145	0	AT1G30040;AT1G78440;AT2G34555	GA2OX2;GA2OX1;GA2OX3	Encodes a gibberellin 2-oxidase that acts on C-19 gibberellins. AtGA2OX2 expression is responsive to cytokinin and KNOX activities.;Encodes a gibberellin 2-oxidase that acts on C19 gibberellins.;Encodes a gibberellin 2-oxidase that acts on C19 gibberellins to deactivate them.
TraesCS1B02G146400	C1	10.7903	7.92798	7.44926	7.10115	8.82816	AT1G53023;AT1G53025;AT3G15355	UBC39;AT1G53025;UBC25	Ubiquitin-conjugating enzyme family protein;(source:Araport11);Ubiquitin-conjugating enzyme family protein;(source:Araport11);ubiquitin-conjugating enzyme 25;(source:Araport11)
TraesCS1B02G149600	C1	0.454653	0.138975	0.105618	0.0815505	0.305992	NA	NA	NA
TraesCS1B02G150400	C1	5.46452	2.63884	5.22804	3.76547	4.00814	AT2G30390	FC2	Encodes one of two ferrochelatase genes in Arabidopsis. Ferrochelatase is the terminal enzyme of heme biosynthesis. FC-II is speculated to operate in photosynthetic cytochromes.
TraesCS1B02G151300	C1	74.1846	11.3517	10.8651	11.3	11.0909	AT4G24280;AT5G49910	HSP70-6;HSP70-7	Involved in protein import into chloroplasts during early developmental stages. The mRNA is cell-to-cell mobile.;Stromal heat shock protein involved in protein import into chloroplast. The mRNA is cell-to-cell mobile.
TraesCS1B02G152100	C1	33.9584	31.7279	35.6308	26.7129	23.1625	AT4G39990;AT5G65270	RABA4B;RABA4A	Rab GTPase that selectively marks cell wall-containing TGN compartments. Involved in protein trafficking to membranes during tip growth.;RAB GTPase homolog A4A;(source:Araport11)
TraesCS1B02G157000	C1	299.204	66.6358	32.6259	39.4011	40.988	AT2G36950;AT5G03380	HIPP05;HIPP06	Heavy metal transport/detoxification superfamily protein;(source:Araport11);Heavy metal transport/detoxification superfamily protein;(source:Araport11)
TraesCS1B02G159700	C1	1.13164	0.677607	0.559049	0.608719	1.04141	NA	NA	NA
TraesCS1B02G159800	C1	24.3143	2.53347	3.0682	7.55266	7.09121	AT3G47160;AT5G01520;AT5G58787	AT3G47160;AIRP2;AT5G58787	RING/U-box superfamily protein;(source:Araport11);Encodes a cytosolic RING-type E3 ubiquitin (Ub) ligase that is critical for ABA and high salinity responses during germination. AtAIRP2 and SDIR1 likely play a combinatory role in ABA signaling and the response to high salt in Arabidopsis.;Encodes a cytosolic protein with E3 ligase activity that is involved in positive regulation of ABA responses.
TraesCS1B02G161300	C1	43.6254	16.2837	16.6936	16.7511	9.86838	AT5G48880	KAT5	Encodes a peroxisomal 3-keto-acyl-CoA thiolase 2 precursor. EC2.3.1.16 thiolases. AT5G48880.1 is named PKT1 and AT5G48880.2 is named PKT2.
TraesCS1B02G162000	C1	3.35233	0.73673	1.11054	1.43466	1.84972	NA	NA	NA
TraesCS1B02G165500	C1	3.08766	0.180583	0.144524	0.299632	0.117999	AT4G28706;AT5G43910	AT4G28706;AT5G43910	pfkB-like carbohydrate kinase family protein;(source:Araport11);pfkB-like carbohydrate kinase family protein;(source:Araport11)
TraesCS1B02G167700	C1	12.9519	4.18512	6.19855	7.45186	7.29643	NA	NA	NA
TraesCS1B02G169500	C1	1.92202	0.0830232	0.164999	0.253005	0.228326	AT1G07720;AT2G28630;AT5G04530	KCS3;KCS12;KCS19	Encodes KCS3, a member of the 3-ketoacyl-CoA synthase family involved in the biosynthesis of VLCFA (very long chain fatty acids).;Encodes KCS12, a member of the 3-ketoacyl-CoA synthase family involved in the biosynthesis of VLCFA (very long chain fatty acids).;Encodes KCS19, a member of the 3-ketoacyl-CoA synthase family involved in the biosynthesis of VLCFA (very long chain fatty acids).
TraesCS1B02G169600	C1	8.87713	8.29368	8.05929	7.63666	6.33731	AT3G24180	AT3G24180	Beta-glucosidase, GBA2 type family protein;(source:Araport11)
TraesCS1B02G169700	C1	0.747927	0.0808802	0.458607	0.384516	0.288526	NA	NA	NA
TraesCS1B02G169800	C1	1.3783	0.673615	0.818653	0.773631	0.536536	NA	NA	NA
TraesCS1B02G170500	C1	2.45266	1.37289	1.63197	1.52291	1.19367	NA	NA	NA
TraesCS1B02G171300	C1	0.522167	0.429384	0.146356	0.151197	0.0771102	NA	NA	NA
TraesCS1B02G171400	C1	5.32203	4.20506	4.25162	3.71935	2.88	AT1G03950	VPS2.3	vacuolar protein sorting-associated protein 2.3;(source:Araport11)
TraesCS1B02G171800	C1	1.55957	0.712691	0.698999	0.897357	0.369845	AT1G03990;AT3G23410;AT4G28570	FAO1;FAO3;FAO4B	Long-chain fatty alcohol dehydrogenase family protein;(source:Araport11);Encodes a fatty alcohol oxidase.;Long-chain fatty alcohol dehydrogenase family protein;(source:Araport11)
TraesCS1B02G172100	C1	1.85073	0.296094	0.0877053	0.576512	0.733101	AT2G31160	LSH3	LIGHT-DEPENDENT SHORT HYPOCOTYLS-like protein (DUF640);(source:Araport11)
TraesCS1B02G174100	C1	21.6424	2.20019	5.4125	12.9997	21.003	NA	NA	NA
TraesCS1B02G175800	C1	2.12117	1.09653	0.699746	1.00425	1.68469	NA	NA	NA
TraesCS1B02G178300	C1	4.2051	3.8824	2.20375	1.22668	0.779608	NA	NA	NA
TraesCS1B02G178500	C1	70.591	11.0122	4.74834	12.9857	9.64842	AT5G08290	YLS8	Encodes Dim1 homolog.
TraesCS1B02G180900	C1	15.1058	14.0458	11.4355	14.287	12.3355	AT1G15130	BRO1	ALIX mediates endosomal protein trafficking and turnover through the ESCRT/MVB pathway. One target is the phosphate transporter PHT1;1. Modulates ABA-mediated inhibition of plant growth and stomatal aperture (PMID:31363038).
TraesCS1B02G182200	C1	123.079	6.41772	7.29327	1.06302	0.703521	AT1G17810;AT1G73190	TIP3-2;TIP3-1	beta-tonoplast intrinsic protein (beta-TIP) mRNA, complete;Moves to the Protein Storage Vacuole in a Golgi independent manner
TraesCS1B02G182400	C1	0.428993	0.033868	0.0821989	0.142192	0.0741156	NA	NA	NA
TraesCS1B02G183500	C1	91.9431	6.55182	7.56219	6.48678	6.6647	AT1G54540;AT1G65690;AT5G36970	AT1G54540;NHL6;NHL25	Late embryogenesis abundant (LEA) hydroxyproline-rich glycoprotein family;(source:Araport11);Encodes NHL6 (NDR1/HIN1-like 6). Plays an important role in the abiotic stresses-induced ABA signaling and biosynthesis, particularly during seed germination and early seedling development.;NDR1/HIN1-like protein, expression induced during incompatible response to a pathogen, expression is at least partly…
TraesCS1B02G186200	C1	11.1228	6.69751	9.51396	9.94718	8.14499	AT1G11060;AT1G61030	AT1G11060;AT1G61030	Encodes one of two redundant proteins (the other is WAPL2) that are involved in prophase removal of cohesion during meiosis. Double mutants with wapl2 exhibit reduced fertility due to defects in meiosis and also some abnormal embryo development in rare cases where embryos are formed.;Encodes one of two redundant proteins (the other is WAPL1) that are involved in prophase removal of cohesion durin…
TraesCS1B02G186300	C1	39.7853	0.678592	0.0783413	0.102304	0.198001	AT4G27440;AT5G54190	PORB;PORA	light-dependent NADPH:protochlorophyllide oxidoreductase B The mRNA is cell-to-cell mobile.;light-dependent NADPH:protochlorophyllide oxidoreductase A
TraesCS1B02G186700	C1	13.4294	2.81944	2.97098	9.00121	11.9657	AT2G26740;AT2G26750	ATSEH;AT2G26750	Encodes a soluble epoxide hydrolase whose expression is induced by auxin and water stress.;alpha/beta-Hydrolases superfamily protein;(source:Araport11)
TraesCS1B02G187200	C1	30.0359	21.9814	10.3342	8.37205	6.55997	AT4G27460;AT5G53750	CBSX5;AT5G53750	Cystathionine beta-synthase (CBS) family protein;(source:Araport11);CBS domain-containing protein;(source:Araport11)
TraesCS1B02G187600	C1	13.1142	10.4947	7.92181	6.65537	5.79012	NA	NA	NA
TraesCS1B02G188300	C1	176.859	24.1029	19.4783	40.576	24.3041	AT2G23790;AT4G36820;AT5G42610;AT5G66650	AT2G23790;AT4G36820;AT5G42610;AT5G66650	calcium uniporter (DUF607);(source:Araport11);Mitochondrial calcium channel.;calcium uniporter (DUF607);(source:Araport11);Chloroplast localized mitochondrial calcium uniporter.
TraesCS1B02G188400	C1	1.12731	0.365658	0.0632776	0.167378	0.182869	AT1G24470	KCR2	Encodes one of the two Arabidopsis homologues to YBR159w encoding a S. cerevisiae beta-ketoacyl reductase (KCR), which catalyzes the first reduction during VLCFA (very long chain fatty acids, >18 carbon) elongation: KCR1 (At1g67730), KCR2 (At1g24470). Complementation of the yeast ybr159Delta mutant demonstrated that the two KCR proteins are divergent and that only AtKCR1 can restore heterologous …
TraesCS1B02G188500	C1	0.68639	0.0444184	0.384769	0.187841	0.0925473	AT2G21385	AT2G21385	Encodes a chloroplast stroma localized protein that is found only in the green plant lineage. It is involved in assembly of the chloroplast ATP synthase complex.
TraesCS1B02G190600	C1	0.289378	0	0	0.0349158	0.276891	AT3G03480;AT5G17540	CHAT;AT5G17540	acetyl CoA:(Z)-3-hexen-1-ol acetyltransferase;(source:Araport11);HXXXD-type acyl-transferase family protein;(source:Araport11)
TraesCS1B02G190900	C1	4.16414	2.97551	2.62767	3.94855	3.51358	AT3G48880	AT3G48880	Encodes an F-box protein, SNIPER4, that regulates the turnover of MUSE13 and MUSE14, redundant TRAF proteins serving as adaptors in the SCFCRP1 complex to facilitate the turnover of nucleotide-binding domain and leucine-rich repeats (NLR) immune receptors.
TraesCS1B02G191600	C1	0.642806	0.0737033	0.0551635	0.0725407	0.0500074	AT5G53490	AT5G53490	thylakoid lumenal 17.4 kDa protein, chloroplast, identical to SP:P81760 Thylakoid lumenal 17.4 kDa protein, chloroplast precursor (P17.4) {Arabidopsis thaliana}. Putative pentapeptide protein.
TraesCS1B02G192500	C1	78.1065	40.7283	75.7404	54.1246	56.3685	AT1G07790;AT2G28720;AT2G37470;AT3G09480;AT3G45980;AT3G46030;AT3G53650;AT5G02570;AT5G22880;AT5G59910	HTB1;AT2G28720;AT2G37470;AT3G09480;H2B;HTB11;AT3G53650;AT5G02570;H2B;HTB4	Encodes a histone 2B (H2B) protein.;Histone superfamily protein;(source:Araport11);Histone superfamily protein;(source:Araport11);Histone superfamily protein;(source:Araport11);Encodes a histone 2B (H2B) protein. This protein can be ubiquitinated in planta, and this modification depends on the HUB1 and HUB2 E3 ubiquitin ligases as well as the UBC1 and UBC2 E2 ubiquitin conjugating enzymes. Lysine…
TraesCS1B02G192700	C1	8.57135	5.65139	6.5102	9.67955	7.19109	AT3G54010	PAS1	Immunophilin-like protein similar to the p59 FK506-binding protein (FKBP52). Shows rotamase activity and contains an FKBP-like domain and three tetratricopeptide repeat units. Members of this class of mutation show ectopic cell proliferation in cotyledons. Gene may be alternatively spliced. Belongs to one of the 36 carboxylate clamp (CC)-tetratricopeptide repeat (TPR) proteins (Prasad 2010, Pubme…
TraesCS1B02G193800	C1	1.0803	0.251775	0.647151	0.665806	0.18751	AT2G21230;AT4G38900	AT2G21230;AT4G38900	bZIP30 is a transcriptional activator that is involved in regulation of growth and development of reproductive organs. It interacts with a number of developmental regulators including WUS, HEC1, KNAT1/BP, KNAT2, JAB, BEL1, and NGA1.;Basic-leucine zipper (bZIP) transcription factor family protein;(source:Araport11)
TraesCS1B02G194100	C1	15.006	14.9469	5.54504	11.99	9.73391	NA	NA	NA
TraesCS1B02G194300	C1	33.1006	26.8014	10.808	26.925	27.2838	NA	NA	NA
TraesCS1B02G194600	C1	7.37437	4.24484	2.7755	4.98563	7.45845	NA	NA	NA
TraesCS1B02G195100	C1	22.2277	15.6043	9.54683	5.03365	5.42178	NA	NA	NA
TraesCS1B02G195400	C1	4.93553	3.67418	1.71999	1.60798	0.727339	NA	NA	NA
TraesCS1B02G196400	C1	28.3325	28.8349	13.9845	11.7068	9.5454	AT3G61060	AtPP2-A13	phloem protein 2-A13;(source:Araport11)
TraesCS1B02G196600	C1	30.7135	3.28393	3.71471	2.80544	1.78995	AT5G07250	RBL3	RHOMBOID-like protein 3;(source:Araport11)
TraesCS1B02G196900	C1	4.46712	0.515733	0.0189625	0.0355491	0.170423	NA	NA	NA
TraesCS1B02G197000	C1	63.4166	3.19346	0.625732	1.34749	2.66229	NA	NA	NA
TraesCS1B02G198100	C1	5.98091	2.27756	1.23659	2.61822	2.25199	NA	NA	NA
TraesCS1B02G198700	C1	12.0003	2.25008	1.31692	1.21789	1.32164	AT2G46620	AT2G46620	P-loop containing nucleoside triphosphate hydrolases superfamily protein;(source:Araport11)
TraesCS1B02G199600	C1	78.5355	24.3105	21.0512	21.4776	17.4204	AT1G64660	MGL	Encodes a functional methionine gamma-lyase, a cytosolic enzyme catalyzes the degradation of methionine into methanethiol, alpha-ketobutyrate and ammonia. The catabolism of excess methionine is important to methionine homeostasis. The mRNA is cell-to-cell mobile.
TraesCS1B02G199900	C1	5.00554	0	0	0	0.0740234	NA	NA	NA
TraesCS1B02G200600	C1	0.411133	0.0293109	0.0285015	0.129184	0	AT5G20740	AT5G20740	Plant invertase/pectin methylesterase inhibitor superfamily protein;(source:Araport11)
TraesCS1B02G201000	C1	4.77377	2.00392	1.93729	1.56176	1.50668	AT2G46910	PAP10	Plastid-lipid associated protein PAP / fibrillin family protein;(source:Araport11)
TraesCS1B02G201300	C1	0.582631	0.132649	0.0988029	0.180649	0.310667	NA	NA	NA
TraesCS1B02G201400	C1	50.2373	47.09	40.1024	41.8341	37.2554	NA	NA	NA
TraesCS1B02G201800	C1	5.76707	4.06941	0.749425	4.94417	1.69676	AT5G53590	AT5G53590	SAUR-like auxin-responsive protein family;(source:Araport11)
TraesCS1B02G202200	C1	2.75205	1.47138	2.73826	1.55438	1.4459	AT3G51120	AT3G51120	zinc finger CCCH domain-containing protein 44;(source:Araport11)
TraesCS1B02G204100	C1	2.53635	0.112784	0.359738	0.46536	0.24005	NA	NA	NA
TraesCS1B02G205800	C1	17.5971	7.98816	7.52074	8.89052	7.84744	NA	NA	NA
TraesCS1B02G207700	C1	25.508	21.1933	16.4377	13.1171	13.3242	AT1G32700;AT4G17900;AT5G46710	AT1G32700;AT4G17900;AT5G46710	PLATZ transcription factor family protein;(source:Araport11);PLATZ transcription factor family protein;(source:Araport11);PLATZ transcription factor family protein;(source:Araport11)
TraesCS1B02G208000	C1	103.936	13.1502	10.6296	16.1052	20.7097	AT1G32640;AT4G17880;AT5G46760;AT5G46830	MYC2;MYC4;MYC3;BHLH28	Encodes a MYC-related transcriptional activator with a typical DNA binding domain of a basic helix-loop-helix leucine zipper motif. Binds to an extended G-Box promoter motif and interacts with Jasmonate ZIM-domain proteins. MYC2 interacts with EIN3 and EIL1 to repress hook curvature and resistance to Botrytis cinera.Its transcription is induced by dehydration stress, ABA treatment and blue light …
TraesCS1B02G208400	C1	22.6459	3.0179	4.92679	13.8783	10.8699	AT4G17710;AT5G46880	HDG4;HDG5	Encodes a homeobox-leucine zipper family protein belonging to the HD-ZIP IV family.;homeobox-7;(source:Araport11)
TraesCS1B02G209200	C1	157.641	41.9326	56.8314	82.5583	62.005	AT4G17940	AT4G17940	Tetratricopeptide repeat (TPR)-like superfamily protein;(source:Araport11)
TraesCS1B02G209700	C1	14.4766	4.40743	1.90617	3.94595	4.62233	NA	NA	NA
TraesCS1B02G210400	C1	19.8209	1.70041	1.54563	2.56942	2.14585	NA	NA	NA
TraesCS1B02G213400	C1	28.4095	16.5592	6.04438	9.46707	6.91747	AT4G25030;AT5G45410	AT4G25030;AT5G45410	Plastid localized protein of unknown function. Mutants are more susceptible to P. syringae and produce less callose upon infection.;Plastid localized protein of unknown function. Mutants are more susceptible to P. syringae and produce less callose upon infection.
TraesCS1B02G213600	C1	1.18622	0.571565	0.644545	0.999804	0.64052	AT1G31850;AT4G19120	AT1G31850;ERD3	S-adenosyl-L-methionine-dependent methyltransferases superfamily protein;(source:Araport11);S-adenosyl-L-methionine-dependent methyltransferases superfamily protein;(source:Araport11)
TraesCS1B02G213900	C1	17.2623	15.7874	6.74424	12.0732	16.6609	AT3G51670	PATL6	PATLs belong to a family of proteins having a Golgi dynamics (GOLD) domain in tandem with the Sec14p-like domain. PATLs are auxin regulated. Quadruple mutants (patl2456) show altered PIN1 lateralization in root endodermis cells.
TraesCS1B02G215200	C1	15.5638	13.1544	9.65749	12.3759	10.7388	AT1G14530;AT2G02180	THH1;TOM3	tobamovirus multiplication-like protein (DUF1084);(source:Araport11);Necessary for the efficient multiplication of tobamoviruses. The mRNA is cell-to-cell mobile.
TraesCS1B02G217200	C1	9.75915	1.13006	1.12752	0.509412	0.64393	AT3G45960;AT3G45970;AT4G38400	EXLA3;EXLA1;EXLA2	member of EXPANSIN-LIKE. Naming convention from the Expansin Working Group (Kende et al, 2004. Plant Mol Bio);member of EXPANSIN-LIKE. Naming convention from the Expansin Working Group (Kende et al, 2004. Plant Mol Bio) The mRNA is cell-to-cell mobile.;member of EXPANSIN-LIKE. Naming convention from the Expansin Working Group (Kende et al, 2004. Plant Mol Bio)
TraesCS1B02G217800	C1	7.84917	4.07349	6.18866	6.38998	6.16034	AT4G35140;AT4G38480	AT4G35140;AT4G38480	Transducin/WD40 repeat-like superfamily protein;(source:Araport11);Transducin/WD40 repeat-like superfamily protein;(source:Araport11)
TraesCS1B02G218700	C1	24.2576	7.12785	3.96957	9.60587	5.04486	AT2G17730;AT4G35840;AT5G66070	NIP2;AT4G35840;AT5G66070	Intrinsic thylakoid membrane protein that fixes RPOTmp on the stromal side of the thylakoid membrane.;RING/U-box superfamily protein;(source:Araport11);E3 ubiquitin ligase that functions in negative regulation of ABA signaling.
TraesCS1B02G221600	C1	29.3143	11.426	23.6533	17.2818	17.1457	NA	NA	NA
TraesCS1B02G223300	C1	5.05813	0.188312	0.0561262	2.72325	0.566307	AT3G30775;AT5G38710	POX1;POX2	Encodes a proline oxidase that is predicted to localize to the inner mitochondrial membrane, its mRNA expression induced by high levels of Al and by osmotic stress. The promoter contains an L-proline-inducible element.;Methylenetetrahydrofolate reductase family protein;(source:Araport11)
TraesCS1B02G224500	C1	2.96549	2.85738	1.06928	1.29743	1.78033	AT4G22580	GT19	Exostosin family protein;(source:Araport11)
TraesCS1B02G225300	C1	5.59349	0.98104	0.418625	2.26288	1.66075	AT2G35710;AT4G16600	PGSIP8;PGSIP7	Nucleotide-diphospho-sugar transferases superfamily protein;(source:Araport11);Nucleotide-diphospho-sugar transferases superfamily protein;(source:Araport11)
TraesCS1B02G225500	C1	0.791042	0.0961574	0.551256	0.61221	0.437697	NA	NA	NA
TraesCS1B02G226400	C1	15.3341	12.4961	5.1688	5.54683	4.78414	NA	NA	NA
TraesCS1B02G227100	C1	1.60009	1.64398	0.305765	1.25999	1.65836	AT2G38740	SGPP	HAD-type phosphosugar phosphatase.
TraesCS1B02G228500	C1	51.1454	34.8573	29.8217	37.0923	35.7823	AT2G44650;AT3G60210	CPN10-2;CPN10-1	Encodes a chloroplast-localized chaperonin 10 whose mRNA is expressed in leaves and stems but not roots.;GroES-like family protein;(source:Araport11)
TraesCS1B02G229000	C1	43.4609	5.01916	4.699	7.03446	6.59111	AT4G17090	BAM3	Encodes a beta-amylase targeted to the chloroplast. Transgenic BMY8 RNAi lines fail to accumulate maltose during cold shock suggesting that maltose accumulation coincides with BMY8 expression. Apart from maltose, the sugar content of the RNAi lines were similar to wildtype (glucose and sucrose unaffected).BAM3 activity declines 2 and 4 days after start of cold stress despite an increase in transc…
TraesCS1B02G229100	C1	24.5947	15.0524	10.6798	12.3179	10.3806	AT1G02170;AT4G25110	AMC1;AMC2	Encodes a type I metacaspase. Two Arabidopsis metacaspases, AT1G02170 (MC1) and AT4G25110 (MC2) antagonistically control programmed cell death in Arabidopsis. MC1 is a positive regulator of cell death and requires conserved caspase-like putative catalytic residues for its function. MC2 negatively regulates cell death. This function is independent of the putative catalytic residues. A third type I…
TraesCS1B02G229400	C1	10.6875	4.62725	8.90958	0.722818	0.239613	NA	NA	NA
TraesCS1B02G230200	C1	3.67867	0.388617	0.952812	0.739931	1.33536	NA	NA	NA
TraesCS1B02G230900	C1	18.2714	9.17245	4.12933	2.01814	1.97355	AT1G70160	AT1G70160	zinc finger MYND domain protein;(source:Araport11)
TraesCS1B02G231500	C1	8.47979	0.376776	0.117199	0.202578	0.411558	AT4G17490	ERF6	Encodes a member of the ERF (ethylene response factor) subfamily B-3 of ERF/AP2 transcription factor family (ATERF-6). The protein contains one AP2 domain. There are 18 members in this subfamily including ATERF-1, ATERF-2, AND ATERF-5. It is involved in the response to reactive oxygen species and light stress. Involved in regulating root architecture and the response to cold stress.
TraesCS1B02G232000	C1	6.29872	3.30613	3.54432	3.21197	3.97643	NA	NA	NA
TraesCS1B02G232100	C1	2.87327	0	0	0	0.0149791	AT4G16820	PLA-I{beta]2	Encodes a lipase that hydrolyzes phosphatidylcholine, glycolipids as well as triacylglycerols.
TraesCS1B02G233300	C1	3.40496	0.82339	0.339272	0.854525	1.23098	AT2G44940;AT3G60490	ERF034;ERF035	encodes a member of the DREB subfamily A-4 of ERF/AP2 transcription factor family. The protein contains one AP2 domain. There are 17 members in this subfamily including TINY.;encodes a member of the DREB subfamily A-4 of ERF/AP2 transcription factor family. The protein contains one AP2 domain. There are 17 members in this subfamily including TINY.
TraesCS1B02G234800	C1	0.484013	0	0.0569738	0.376082	0.0901714	NA	NA	NA
TraesCS1B02G234900	C1	7.20985	0.671995	0.137861	0.38069	0.701294	NA	NA	NA
TraesCS1B02G235000	C1	6.51992	5.36059	5.37985	5.02777	5.30497	AT5G07120;AT5G58440	SNX2B;SNX2A	Encodes sorting nexin SNX2b. SNX2b is peripherally associated with membranes. Involved in vesicular trafficking from endosomes to the vacuole.;sorting nexin 2A;(source:Araport11)
TraesCS1B02G235100	C1	78.1037	30.4677	28.1219	23.8799	23.6745	AT3G11020;AT5G05410	DREB2B;DREB2A	encodes a member of the DREB subfamily A-2 of ERF/AP2 transcription factor family (DREB2B). The protein contains one AP2 domain. There are eight members in this subfamily including DREB2A.;Encodes a transcription factor that specifically binds to DRE/CRT cis elements (responsive to drought and low-temperature stress). Belongs to the DREB subfamily A-2 of ERF/AP2 transcription factor family (DREB2…
TraesCS1B02G236500	C1	4.83531	1.85227	2.68405	2.42928	2.39123	AT5G58575	AT5G58575	Component of the deubiquitination module of the SAGA complex.
TraesCS1B02G236600	C1	32.1547	15.1408	10.5104	8.10449	7.54668	AT4G32770	VTE1	Tocopherol cyclase involved in tocopherol (vitamin E)synthesis. VTE1 over-expressing plants have increased tocopherol indicating VTE1 is a major limiting factor in tocopherol synthesis. Mutants defective in this gene accumulate high amounts of zeaxanthin in conditions of high light or low temperature. Plays a role in the adaptation to low temperature stress, notably phloem loading.
TraesCS1B02G236700	C1	16.3427	14.3421	4.04167	2.15045	1.20224	AT2G40220	ABI4	Encodes a member of the DREB subfamily A-3 of ERF/AP2 transcription factor family (ABI4). The protein contains one AP2 domain. There is only one member in this family. Involved in abscisic acid (ABA) signal transduction, ABA-mediated glucose response, and hexokinase-dependent sugar responses. Acts downstream of GUN1 in retrograde signaling. Expressed most abundantly in developing siliques and to …
TraesCS1B02G236900	C1	7.67843	0.339595	0.05227	0	0	NA	NA	NA
TraesCS1B02G237500	C1	22.4017	0.454809	0.83609	0	0	NA	NA	NA
TraesCS1B02G237600	C1	38.8221	1.90895	3.04122	0	0.119977	NA	NA	NA
TraesCS1B02G242300	C1	1.1302	0	0.0396691	0.113465	0.0244936	AT3G05640;AT3G16800;AT5G27930	AT3G05640;AT3G16800;PPC6-7	EGR1 functions as a negative regulator of plant growth with prominent effect on plant growth during drought stress.EGR1 regulates microtubule organization and likely affects additional cytoskeleton and trafficking processes along the plasma membrane.;EGR3 functions as a negative regulator of plant growth with prominent effect on plant growth during drought stress, EGR3 regulates microtubule organ…
TraesCS1B02G242400	C1	7.89508	0.988772	0.241614	0.820041	0.374227	AT3G05640;AT3G16800;AT5G27930	AT3G05640;AT3G16800;PPC6-7	EGR1 functions as a negative regulator of plant growth with prominent effect on plant growth during drought stress.EGR1 regulates microtubule organization and likely affects additional cytoskeleton and trafficking processes along the plasma membrane.;EGR3 functions as a negative regulator of plant growth with prominent effect on plant growth during drought stress, EGR3 regulates microtubule organ…
TraesCS1B02G242800	C1	0.435461	0.0332936	0.0365579	0.0425267	0.036626	NA	NA	NA
TraesCS1B02G243700	C1	7.58684	5.38657	3.57732	4.68896	1.96438	AT2G47630;AT3G62860	AT2G47630;AT3G62860	alpha/beta-Hydrolases superfamily protein;(source:Araport11);alpha/beta-Hydrolases superfamily protein;(source:Araport11)
TraesCS1B02G243800	C1	120.729	106.201	60.2528	65.9429	51.3175	AT2G47650;AT3G62830	UXS4;UXS2	Encodes a Golgi localized isoform of UDP-glucuronic acid decarboxylase. UDP-glucuronic acid decarboxylase produces UDP-xylose, which is a substrate for many cell wall carbohydrates including hemicellulose and pectin. UDP-xylose is also known to feedback regulate several cell wall biosynthetic enzymes.;Encodes a Golgi localized isoform of UDP-glucuronic acid decarboxylase. This enzyme produces UDP…
TraesCS1B02G243900	C1	9.59795	4.31654	0.499828	0.19558	0.282054	AT3G06880	AT3G06880	Transducin/WD40 repeat-like superfamily protein;(source:Araport11)
TraesCS1B02G244800	C1	4.53006	0.284688	0.0836114	0.0346996	0.0157591	NA	NA	NA
TraesCS1B02G244900	C1	207.094	58.5007	83.6745	69.8463	75.0538	AT1G07790;AT2G28720;AT2G37470;AT3G09480;AT3G45980;AT3G46030;AT3G53650;AT5G02570;AT5G22880;AT5G59910	HTB1;AT2G28720;AT2G37470;AT3G09480;H2B;HTB11;AT3G53650;AT5G02570;H2B;HTB4	Encodes a histone 2B (H2B) protein.;Histone superfamily protein;(source:Araport11);Histone superfamily protein;(source:Araport11);Histone superfamily protein;(source:Araport11);Encodes a histone 2B (H2B) protein. This protein can be ubiquitinated in planta, and this modification depends on the HUB1 and HUB2 E3 ubiquitin ligases as well as the UBC1 and UBC2 E2 ubiquitin conjugating enzymes. Lysine…
TraesCS1B02G245300	C1	93.4479	30.8737	43.5349	38.8925	41.529	AT1G07790;AT2G28720;AT2G37470;AT3G09480;AT3G45980;AT3G46030;AT3G53650;AT5G02570;AT5G22880;AT5G59910	HTB1;AT2G28720;AT2G37470;AT3G09480;H2B;HTB11;AT3G53650;AT5G02570;H2B;HTB4	Encodes a histone 2B (H2B) protein.;Histone superfamily protein;(source:Araport11);Histone superfamily protein;(source:Araport11);Histone superfamily protein;(source:Araport11);Encodes a histone 2B (H2B) protein. This protein can be ubiquitinated in planta, and this modification depends on the HUB1 and HUB2 E3 ubiquitin ligases as well as the UBC1 and UBC2 E2 ubiquitin conjugating enzymes. Lysine…
TraesCS1B02G245400	C1	2.73333	0.441478	0.745027	1.19635	0.63622	AT1G02880;AT2G44750	TPK1;TPK2	Encodes a thiamine pyrophosphokinase capable of producing thiamine pyrophosphate from free thiamine.;Encodes a thiamine pyrophosphokinase capable of producing thiamine pyrophosphate from free thiamine.
TraesCS1B02G245500	C1	5.48548	0.0242467	0	0.117464	0.052046	AT4G01410	AT4G01410	Late embryogenesis abundant (LEA) hydroxyproline-rich glycoprotein family;(source:Araport11)
TraesCS1B02G245800	C1	4.06775	0	0.281495	0.57439	0.639603	NA	NA	NA
TraesCS1B02G246100	C1	0.257096	0.0245861	0.0925263	0.0722106	0.222708	NA	NA	NA
TraesCS1B02G247800	C1	11.0953	7.25677	8.55077	8.69819	5.33302	AT1G03457;AT4G03110	AT1G03457;BRN1	RNA-binding (RRM/RBD/RNP motifs) family protein;(source:Araport11);Encodes a putative RNA-binding protein that is located in the cytoplasm and is involved in the hypersensitive response and positively regulates salicylic acid-mediated immunity.
TraesCS1B02G248600	C1	25.019	19.3939	10.5451	2.78525	0.918329	NA	NA	NA
TraesCS1B02G250900	C1	236.424	5.45935	1.61644	0.929201	1.51427	NA	NA	NA
TraesCS1B02G251300	C1	26.813	2.7429	3.132	3.66019	5.22541	NA	NA	NA
TraesCS1B02G252100	C1	6.01633	5.82634	4.86653	5.15821	3.68756	AT1G56590	AP3M	Involved in vesicle trafficking between the trans -Golgi network and vacuoles.
TraesCS1B02G252400	C1	5.28387	3.65191	3.56872	4.12895	3.67202	AT2G01210	ZAR1	ZAR1 encodes a plasma membrane localized leucine-rich repeat receptor-like kinase (LRR-RLK) that contains a putative CaM-binding domain and a G&#946;-binding motif within its intracellular kinase region. Homozygous of function mutations are embryo-lethal and fail to properly make the first asymmetric division of the zygote. ZAR1 interacts with both CaM and G&#946; in vivo and that interaction act…
TraesCS1B02G252900	C1	2.7758	0.495324	0.146634	0.440995	0.359627	AT1G04620	HCAR	Encodes a 7-hydroxymethyl chlorophyll a reductase, an enzyme of the chlorophyll cycle that converts 7-hydroxymethyl chlorophyll a to chlorophyll a.
TraesCS1B02G253000	C1	0.340914	0.02406	0	0.275749	0.0494823	NA	NA	NA
TraesCS1B02G253900	C1	8.36807	5.10552	3.71216	3.75735	1.81554	AT3G21070	NADK1	Encodes a protein with NAD(H) kinase activity.
TraesCS1B02G254000	C1	14.0523	9.9252	10.1749	11.4656	10.465	AT3G63490	RPL1	Ribosomal protein L1p/L10e family;(source:Araport11)
TraesCS1B02G255700	C1	3.0882	0.805314	1.95902	1.16573	1.53912	AT5G26230	MAKR1	Encodes a member of the MAKR (MEMBRANE-ASSOCIATED KINASE REGULATOR) gene family. MAKRs have putative kinase interacting motifs and membrane localization signals. Known members include: AT5G26230 (MAKR1), AT1G64080 (MAKR2), AT2G37380 (MAKR3), AT2G39370 (MAKR4), AT5G52870 (MAKR5) and AT5G52900 (MAKR6).
TraesCS1B02G258100	C1	17.0493	9.72857	13.3646	11.9003	14.6962	AT1G52320;AT5G25590	AT1G52320;AT5G25590	kinesin-like protein;(source:Araport11);DNA ligase (DUF630 and DUF632);(source:Araport11)
TraesCS1B02G258400	C1	13.7443	12.15	7.20281	6.13583	3.9008	NA	NA	NA
TraesCS1B02G258700	C1	10.509	3.87751	3.36694	4.27581	3.62825	AT3G17611	RBL14	RHOMBOID-like protein 14;(source:Araport11)
TraesCS1B02G258900	C1	9.90623	6.74053	4.68976	6.56219	6.4334	AT3G06140;AT5G19080	LUL4;LUL3	Paralog of LOG2 (At3g09770), a ubiquitin ligase that regulates amino acid export.;Paralog of LOG2 (At3g09770), a ubiquitin ligase that regulates amino acid export.
TraesCS1B02G260300	C1	11.2853	8.69644	3.46902	5.09713	2.81019	AT1G54820	AT1G54820	Protein kinase superfamily protein;(source:Araport11)
TraesCS1B02G260800	C1	5.38155	0.275084	0.393253	0.743991	0.341445	AT3G23570;AT3G23600	AT3G23570;AT3G23600	alpha/beta-Hydrolases superfamily protein;(source:Araport11);alpha/beta-Hydrolases superfamily protein;(source:Araport11)
TraesCS1B02G261300	C1	1.30276	0.797696	0.731278	0.904222	0.918363	NA	NA	NA
TraesCS1B02G261800	C1	0.299491	0.0427791	0.0494434	0.147399	0.0229565	AT1G54780	TLP18.3	Encodes a thylakoid lumen protein regulating photosystem II repair cycle. Has acid phosphatase activity. The mRNA is cell-to-cell mobile.
TraesCS1B02G263300	C1	1.47082	0.68186	0.962695	0.755224	0.969147	NA	NA	NA
TraesCS1B02G263900	C1	6.05457	2.00006	1.63092	2.06838	1.96981	AT4G15545	AT4G15545	NAI1 interacting protein, involved in ER body formation.
TraesCS1B02G264900	C1	19.6696	3.65117	8.04376	7.34962	1.89153	AT4G15530	PPDK	Encodes a dual-targeted protein believed to act as a pyruvate, orthophosphate dikinase. These enzymes are normally associated with C4 photosynthesis which does not occur in Arabidopsis. However, PPDK may play a role in remobilizing nitrogen during leaf senescence in Arabidopsis. The product of the long transcript (.1 gene model) was shown to be targeted to the chloroplast, whereas the shorter tra…
TraesCS1B02G266200	C1	13.8259	2.8928	1.61873	4.89666	4.43905	NA	NA	NA
TraesCS1B02G266500	C1	1.47556	0.104938	0.486596	1.01276	0.459625	AT3G21500;AT4G15560	DXPS1;DXS	Encodes a protein that has very high sequence similarity to 1-deoxy-D-xylulose-5-phosphate synthase proteins but does not possess appreciable activity in vitro. It is not likely to play a major role in isoprenoid biosynthesis.;Encodes a protein with 1-deoxyxylulose 5-phosphate synthase activity involved in the MEP pathway. It is essential for chloroplast development in Arabidopsis
TraesCS1B02G266600	C1	9.63183	6.76494	8.20194	8.32702	9.40844	NA	NA	NA
TraesCS1B02G267200	C1	11.6752	5.27852	9.74672	8.3998	7.74524	AT2G38720	MAP65-5	microtubule-associated protein 65-5;(source:Araport11)
TraesCS1B02G268600	C1	50.0179	8.00039	8.07614	12.3577	10.6934	AT4G15420	AT4G15420	Ubiquitin fusion degradation UFD1 family protein;(source:Araport11)
TraesCS1B02G269600	C1	61.2757	11.2958	11.3112	12.3767	9.53654	AT3G10820;AT5G05140	MED26A;MED26B	Transcription elongation factor (TFIIS) family protein;(source:Araport11);Transcription elongation factor (TFIIS) family protein;(source:Araport11)
TraesCS1B02G269700	C1	5.73734	3.66596	3.97159	5.99607	4.30144	NA	NA	NA
TraesCS1B02G269800	C1	34.1085	3.10703	4.89321	6.47945	6.0082	NA	NA	NA
TraesCS1B02G270100	C1	12.1055	11.557	5.74274	6.57513	6.87131	AT1G65590	HEXO3	Encodes a protein with beta-hexosaminidase activity. Located on the plasma membrane.
TraesCS1B02G270800	C1	3.86202	1.91211	2.15033	2.37436	2.4111	AT2G31840	MRL7L	Thioredoxin superfamily protein;(source:Araport11)
TraesCS1B02G272000	C1	0.327678	0	0.0200501	0.0738364	0.0900462	AT1G64480	CBL8	calcineurin B-like protein 8, member of plant-specific family of calcium sensor proteins containing 3 EF-hand motifs
TraesCS1B02G272200	C1	17.5788	4.30972	4.76642	4.7194	3.60629	AT2G44110;AT4G02600	MLO15;MLO1	A member of a large family of seven-transmembrane domain proteins specific to plants, homologs of the barley mildew resistance locus o (MLO) protein. The Arabidopsis genome contains 15 genes encoding MLO proteins, with localization in plasma membrane. Phylogenetic analysis revealed four clades of closely-related AtMLO genes. ATMLO15 belongs to the clade II, with ATMLO13 and ATMLO15. The gene is e…
TraesCS1B02G272700	C1	1.16698	0.038494	0.0205509	0.0891523	0.123213	AT5G38520	AT5G38520	CLD1 is involved in steady-state chlorophyll turnover; CLD1 dephytylates chlorophyll a, chlorophyll b, and pheophytin a in vitro; CLD1 and CHLG form a salvage cycle in recycling chlorophyll. Suppression of CLD1 expression results in reduced tolerance to moderately high temperature.
TraesCS1B02G273500	C1	25.5258	1.53348	0.320081	2.79828	9.33011	AT1G71691	AT1G71691	GDSL-motif esterase/acyltransferase/lipase. Enzyme group with broad substrate specificity that may catalyze acyltransfer or hydrolase reactions with lipid and non-lipid substrates.
TraesCS1B02G273700	C1	1.42114	0	0	0	0.135122	AT1G22810;AT1G71520	ERF019;ERF020	encodes a member of the DREB subfamily A-5 of ERF/AP2 transcription factor family. The protein contains one AP2 domain. There are 16 members in this subfamily including RAP2.1, RAP2.9 and RAP2.10. Overexpression leands to delayed senescence and delayed flowering. Negatively regulates plant resistance to P. parasitica by suppressing PAMP-triggered immunity.;encodes a member of the DREB subfamily A…
TraesCS1B02G274900	C1	3.44487	0.486724	1.38924	1.09569	1.11006	NA	NA	NA
TraesCS1B02G275200	C1	19.1968	2.19891	4.24685	0.825987	0.627142	AT5G09220;AT5G63850	AAP2;AAP4	member of AAAP family The mRNA is cell-to-cell mobile.;Amino acid transporter whose expression is downregulated by dehydration.
TraesCS1B02G276000	C1	0.350789	0.0187159	0	0	0	AT1G21460	SWEET1	Nodulin MtN3 family protein;(source:Araport11)
TraesCS1B02G277600	C1	7.16994	2.0859	0.349848	0.186611	1.06639	NA	NA	NA
TraesCS1B02G278500	C1	25.9166	1.96073	1.31678	4.28913	7.89337	AT1G44760	AT1G44760	Adenine nucleotide alpha hydrolases-like superfamily protein;(source:Araport11)
TraesCS1B02G278800	C1	23.226	23.4468	2.57098	3.59372	5.07323	NA	NA	NA
TraesCS1B02G279300	C1	8.89101	5.83125	5.35761	4.37298	5.04978	AT1G22610	AT1G22610	C2 calcium/lipid-binding plant phosphoribosyltransferase family protein;(source:Araport11)
TraesCS1B02G279400	C1	1.18241	0.11686	0.108793	0.188518	0.271826	NA	NA	NA
TraesCS1B02G281000	C1	153.835	55.0177	58.3777	91.2244	80.7317	AT1G71950	AT1G71950	SPI-1 is a member of the I9 inhibitor family. It is an inhibitor of SBT4.13 subtilase.
TraesCS1B02G281100	C1	1.28363	0.0980876	0.210873	0.0383333	0.11818	AT1G10940;AT1G60940	ASK1;SRK2B	Encodes a plant protein kinase similar to the calcium/calmodulin-dependent protein kinase subfamily and the SNF1 kinase subfamily (SnRK2) whose activity is activated by ionic (salt) and non-ionic (mannitol) osmotic stress. Kinase activity of its homolog in tobacco is induced by hyperosmotic condition within 1 minute. Phosphatidylinositol 4-phosphate 5-kinase (PIP5K) enzyme family member.;encodes …
TraesCS1B02G281700	C1	61.7533	1.69079	0.638684	2.88306	4.79175	AT1G44414	AT1G44414	zinc-ribbon domain protein;(source:Araport11)
TraesCS1B02G282000	C1	0.10353	0	0	0.0800698	0.0354233	NA	NA	NA
TraesCS1B02G282100	C1	14.4384	3.23868	2.27558	4.73244	3.58815	AT4G02630	AT4G02630	Protein kinase superfamily protein;(source:Araport11)
TraesCS1B02G282600	C1	2.5459	0.305299	0.362166	0.695752	1.70278	NA	NA	NA
TraesCS1B02G282700	C1	4.62124	2.11696	2.23548	1.78578	2.66516	NA	NA	NA
TraesCS1B02G282800	C1	30.2672	19.0495	18.0597	20.9102	17.4595	AT1G03970;AT5G44080	GBF4;AT5G44080	encodes a basic leucine zipper G-box binding factor that can bind to G-box motifs only as heterodimers with GBF2 or GBF3. A single amino acid change can confer G-box binding as homodimers.;Basic-leucine zipper (bZIP) transcription factor family protein;(source:Araport11)
TraesCS1B02G282900	C1	31.205	13.2855	20.4428	26.0275	28.0239	AT1G25280;AT1G43640;AT1G76900	TULP10;TULP5;TULP1	Member of TLP family;Member of TLP family of tubby like proteins that also contain an F-Box.;Member of plant TLP family. Contains terminal F-box domain, interacts with ASK proteins. Tethered to the PM.
TraesCS1B02G284200	C1	11.3257	2.77223	1.83889	4.96558	7.02913	AT3G18710;AT5G09800;AT5G64660	PUB29;PUB28;PUB27	Encodes a protein containing a U-box and an ARM domain. This protein has E3 ubiquitin ligase activity based on in vitro assays.;Plant U-box type E3 ubiquitin ligase (PUB).;CYS, MET, PRO, and GLY protein 2;(source:Araport11)
TraesCS1B02G285000	C1	1.96231	0.0528097	0	0	0	AT3G10580;AT3G10590;AT4G09450	AT3G10580;AT3G10590;AT4G09450	Homeodomain-like superfamily protein;(source:Araport11);Duplicated homeodomain-like superfamily protein;(source:Araport11);Duplicated homeodomain-like superfamily protein;(source:Araport11)
TraesCS1B02G285600	C1	6.05827	4.63349	5.64364	5.5472	3.93625	NA	NA	NA
TraesCS1B02G286300	C1	21.2416	2.40199	1.47801	5.04261	6.62601	AT2G27690	CYP94C1	Encodes a CYP94C1. Has highest omega-hydroxylase activity with 9,10-epoxystearic acid, while also metabolized lauric acid (C12:0) and C18 unsaturated fatty acids. Gene expression is induced in response to wounding and jasmonic acid treatment.
TraesCS1B02G286900	C1	20.3775	7.89982	5.87982	2.10055	2.04059	NA	NA	NA
TraesCS1B02G287100	C1	17.3803	11.8141	5.09738	6.50111	6.82272	AT5G01260	AT5G01260	Carbohydrate-binding-like fold;(source:Araport11)
TraesCS1B02G287200	C1	12.9814	8.53482	7.51301	11.2548	10.8624	AT5G05710	AT5G05710	Pleckstrin homology (PH) domain superfamily protein;(source:Araport11)
TraesCS1B02G287400	C1	19.5453	6.25716	5.0941	3.77101	3.05334	NA	NA	NA
TraesCS1B02G287500	C1	88.3399	6.7066	12.5103	10.6971	11.2679	NA	NA	NA
TraesCS1B02G288000	C1	10.0365	4.29778	2.19767	1.86117	2.39991	AT3G47000;AT3G47010;AT3G47040;AT3G47050	AT3G47000;AT3G47010;AT3G47040;AT3G47050	Glycosyl hydrolase family protein;(source:Araport11);Glycosyl hydrolase family protein;(source:Araport11);Glycosyl hydrolase family protein;(source:Araport11);Glycosyl hydrolase family protein;(source:Araport11)
TraesCS1B02G289900	C1	1.65897	0.27784	0.70624	1.06362	1.58288	NA	NA	NA
TraesCS1B02G290200	C1	0.199399	0.0292405	0	0	0.0107224	AT5G02030	BLH9	Mutant has additional lateral organs and phyllotaxy defect. Encodes a homeodomain transcription factor. Has sequence similarity to the Arabidopsis ovule development regulator Bell1. Binds directly to the AGAMOUS cis-regulatory element. Its localization to the nucleus is dependent on the coexpression of either STM or BP.
TraesCS1B02G291500	C1	0.718337	0.330229	0.114453	0.304917	0.131208	AT2G37760;AT2G37770;AT2G37790;AT3G53880	AKR4C8;AKR4C9;AKR4C10;AKR4C11	Encodes an NADPH-dependent aldo-keto reductase that can act on a wide variety of substrates in vitro including aliphatic and aromatic aldehydes and steroids. Transcript levels for this gene are up-regulated in response to cold, salt, and drought stress.;Encodes an NADPH-dependent aldo-keto reductase that can act on a wide variety of substrates in vitro including saturated and unsaturated aldehyde…
TraesCS1B02G291800	C1	32.6828	0	0	0	0	AT4G21105	AT4G21105	cytochrome-c oxidase/ electron carrier;(source:Araport11)
TraesCS1B02G291900	C1	11.7925	8.75118	10.6731	9.03344	9.16325	NA	NA	NA
TraesCS1B02G292200	C1	0.203403	0	0	0	0	AT3G11325;AT3G11430;AT5G06090	AT3G11325;GPAT5;GPAT7	Phospholipid/glycerol acyltransferase family protein;(source:Araport11);sn-glycerol-3-phosphate 2-O-acyltransferas, involved in the biosynthesis of suberin polyester.;putative sn-glycerol-3-phosphate 2-O-acyltransferase
TraesCS1B02G292800	C1	0.596736	0	0	0.137009	0.490771	AT2G28660	AT2G28660	Chloroplast-targeted copper chaperone protein;(source:Araport11)
TraesCS1B02G293000	C1	36.3143	24.7562	32.0995	31.1916	32.1154	AT1G07510;AT2G29080	FTSH10;FTSH3	encodes an FtsH protease that is localized to the mitochondrion;encodes an FtsH protease that is localized to the mitochondrion
TraesCS1B02G294300	C1	875.455	99.5669	24.4128	87.6639	71.8517	AT3G12580	MED37C	heat shock protein 70;(source:Araport11)
TraesCS1B02G294800	C1	5.55207	4.75502	2.23398	2.27666	1.12969	AT5G59770	AT5G59770	Protein-tyrosine phosphatase-like, PTPLA;(source:Araport11)
TraesCS1B02G295000	C1	1.41904	1.11259	0.929865	0.536764	0.365799	AT5G59770	AT5G59770	Protein-tyrosine phosphatase-like, PTPLA;(source:Araport11)
TraesCS1B02G296300	C1	215.493	96.9085	109.159	145.498	180.561	AT5G02560	HTA12	Encodes HTA12, a histone H2A protein.
TraesCS1B02G296800	C1	9.06604	5.95488	5.21164	5.7554	4.39041	AT3G09560	PAH1	The PAH1 gene encodes a phosphatidate phosphohydrolase. Mutant analysis revealed its involvement in galactolipid synthesis pathway, and the membrane lipid remodeling. The pah1pah2 double-mutant showed enhanced Al-susceptibility under low-P conditions, but there was no significant differences in Al tolerance between pah1pah2 and wild type when they were grown in a solution containing 35 &#956;M Pi.
TraesCS1B02G299300	C1	1.58688	0	0.088991	0.103521	0.793972	NA	NA	NA
TraesCS1B02G299700	C1	10.6499	0.281554	0.0996255	0.644211	1.27061	NA	NA	NA
TraesCS1B02G301200	C1	3.9256	1.1695	0.342467	0.0909267	0.0813272	NA	NA	NA
TraesCS1B02G301500	C1	2.52614	2.07098	1.49319	1.9915	1.68744	AT2G40120;AT4G03175	AT2G40120;AT4G03175	Protein kinase superfamily protein;(source:Araport11);Protein kinase superfamily protein;(source:Araport11)
TraesCS1B02G301700	C1	27.2233	27.3626	18.8069	23.1545	22.6333	AT3G47300;AT5G58640	SELT;AT5G58640	SELT-like protein precursor;(source:Araport11);Selenoprotein, Rdx type;(source:Araport11)
TraesCS1B02G301900	C1	0.410596	0.292623	0.14371	0.0366915	0.0168203	NA	NA	NA
TraesCS1B02G304700	C1	197.674	113.926	171.213	134.687	127.656	NA	NA	NA
TraesCS1B02G304800	C1	149.712	50.599	136.876	26.2208	14.051	AT5G01300	AT5G01300	PEBP (phosphatidylethanolamine-binding protein) family protein;(source:Araport11)
TraesCS1B02G305100	C1	0.553931	0	0.0243465	0	0	NA	NA	NA
TraesCS1B02G305200	C1	12.2723	3.59569	3.08896	4.25034	3.18615	NA	NA	NA
TraesCS1B02G305600	C1	4.37449	2.24261	1.31211	2.83586	0.635735	AT5G58530	AT5G58530	Glutaredoxin family protein;(source:Araport11)
TraesCS1B02G307200	C1	11.7878	7.05979	5.66879	5.9473	6.01078	AT1G07000;AT5G58430	ATEXO70B2;EXO70B1	A member of EXO70 gene family, putative exocyst subunits, conserved in land plants. Arabidopsis thaliana contains 23 putative EXO70 genes, which can be classified into eight clusters on the phylogenetic tree.;A member of EXO70 gene family, putative exocyst subunits, conserved in land plants. Arabidopsis thaliana contains 23 putative EXO70 genes, which can be classified into eight clusters on the …
TraesCS1B02G307700	C1	197.004	1.87764	3.09706	0.0782221	0.356149	AT5G01670	AT5G01670	NAD(P)-linked oxidoreductase superfamily protein;(source:Araport11)
TraesCS1B02G307800	C1	19.6104	4.12225	2.24994	1.12869	1.99032	NA	NA	NA
TraesCS1B02G308300	C1	13.8039	7.27777	8.00978	8.86308	10.9531	AT3G10980;AT5G05350	AT3G10980;AT5G05350	PLAC8 family protein;(source:Araport11);PLAC8 family protein;(source:Araport11)
TraesCS1B02G308500	C1	0.711905	0.0980506	0.0265252	0.153754	0.151581	NA	NA	NA
TraesCS1B02G309000	C1	0.29479	0.149181	0	0	0.127987	AT2G30300	AT2G30300	Major facilitator superfamily protein;(source:Araport11)
TraesCS1B02G309200	C1	15.2352	6.46979	7.55585	11.6527	14.7008	NA	NA	NA
TraesCS1B02G309400	C1	0.371665	0.0528134	0.143684	0.0283191	0.0137338	AT5G01810;AT5G07070;AT5G58380	CIPK15;CIPK2;CIPK10	Encodes a CBL-interacting serine/threonine protein kinase, also has similarities to SOS2 kinase.;Encodes CBL-interacting protein kinase 2 (CIPK2).;Encodes a CBL-interacting protein kinase with similarity to SOS protein kinase.
TraesCS1B02G310100	C1	15.9932	1.40637	1.51197	3.06438	2.63185	AT5G01830	PUB16	Plant U-box type E3 ubiquitin ligase (PUB).
TraesCS1B02G310400	C1	203.587	83.2186	25.3884	2.7563	1.51475	NA	NA	NA
TraesCS1B02G311800	C1	0.274976	0.139774	0.0696362	0.0788986	0.0315637	NA	NA	NA
TraesCS1B02G312400	C1	0.139743	0	0	0	0.01651	NA	NA	NA
TraesCS1B02G312500	C1	1.83863	0.0166999	0.183145	0.455611	0.537245	NA	NA	NA
TraesCS1B02G313800	C1	0.623939	0.0208692	0	0	0.0396696	NA	NA	NA
TraesCS1B02G315900	C1	0.310456	0.0282383	0.0676673	0.0300417	0	AT1G51340;AT3G08040	DTX42;DTX43	Encodes a root citrate transporter which together with the root malate transporter ALMT1 are the primary mechanism of aluminum tolerance.;Encodes a member of the MATE (multidrug and toxin efflux family), expressed in roots but not shoots. Mutants accumulate excess iron, manganese and zinc, and express root Fe(III) chelatase activity even under iron sufficiency conditions. FRD3 is likely to functi…
TraesCS1B02G316000	C1	9.29893	3.00302	0.051788	1.07644	3.53469	NA	NA	NA
TraesCS1B02G316100	C1	0.752751	0.286263	0.511922	0.637166	0.333968	AT3G01170;AT5G15260	AT3G01170;AT5G15260	Ribosomal protein L34e superfamily protein;(source:Araport11);ribosomal protein L34e superfamily protein;(source:Araport11)
TraesCS1B02G316200	C1	0.662215	0.256788	0.298288	0.410538	0.257423	AT3G04030;AT5G18240	MYR2;MYR1	Homeodomain-like superfamily protein;(source:Araport11);Encodes MYR1 (MYR1).
TraesCS1B02G316700	C1	79.9416	80.4447	31.811	28.0269	16.5962	NA	NA	NA
TraesCS1B02G317100	C1	11.2881	3.33099	7.53926	8.71285	9.0149	AT2G41070;AT3G56850	EEL;DPBF3	Transcription factor homologous to ABI5. Regulates AtEm1 expression by binding directly at the AtEm1 promoter. Located in the nucleus and expressed during seed maturation in the cotyledons and later in the whole embryo.;Encodes an ABA-responsive element binding protein with a bZIP domain. Located in the nucleus and expressed in the embryo during seed maturation.
TraesCS1B02G318400	C1	58.0085	32.5535	32.3609	37.1282	25.1652	NA	NA	NA
TraesCS1B02G318500	C1	5.97494	2.62009	2.67358	2.22876	2.64215	AT1G22220;AT1G78100	AT1G22220;AT1G78100	F-box family protein;(source:Araport11);F-box family protein;(source:Araport11)
TraesCS1B02G319000	C1	8.72962	2.4241	3.62543	2.45818	2.92089	AT1G73100;AT5G04940	SUVH3;SUVH1	Encodes a SU(VAR)3-9 homolog, a SET domain protein. Known SET domain proteins are involved in epigenetic control of gene expression and act as histone methyltransferases. There are 10 SUVH genes in Arabidopsis and members of this subfamily of the SET proteins have an additional conserved SRA domain.;Encodes a SU(VAR)3-9 homolog, a SET domain protein. Known SET domain proteins are involved in epig…
TraesCS1B02G319400	C1	152.21	115.595	102.097	98.6876	117.39	NA	NA	NA
TraesCS1B02G321700	C1	1.18905	0.485213	0.213125	0.335882	0.568391	NA	NA	NA
TraesCS1B02G321800	C1	29.742	9.42584	3.05601	7.46999	5.06516	AT2G40890	CYP98A3	encodes coumarate 3-hydroxylase (C3H), a P450-dependent monooxygenase. Involved in lignin biosynthesis and flavonoid biosynthesis. Also affects the biosynthesis of coumarins such as scopoletin and scopolin as a branching-out-pathway from the phenylpropanoid acid level.
TraesCS1B02G322100	C1	16.5071	2.95786	3.6695	5.59865	6.01491	AT2G40880	CYS3	Encodes a protein with cysteine proteinase inhibitor activity. Overexpression increases tolerance to abiotic stressors (i.e.salt,osmotic, cold stress). The mRNA is cell-to-cell mobile.
TraesCS1B02G322800	C1	6.46952	1.72161	1.46996	2.81906	3.68164	NA	NA	NA
TraesCS1B02G323400	C1	7.36755	0	0.0822035	0	0	NA	NA	NA
TraesCS1B02G325800	C1	16.9569	11.1617	6.62994	11.3731	15.4854	AT1G16420;AT1G79310;AT1G79320;AT1G79330;AT1G79340	AMC8;AMC7;AMC6;AMC5;AMC4	Encodes a metacaspase (cysteine-type endopeptidase) that is involved in promoting programmed cell death in response to hydrogen peroxide (H2O2), UV light, and methyl viologen (MV). Transcript levels rise in response to UV-C, H2O2, and MV. In vitro assays demonstrate that this enzyme has a preference for cleaving after an arginine residue, and it has a pH optimum of 8.0.;Encodes a putative metacas…
TraesCS1B02G326200	C1	11.9896	1.17542	1.13675	4.18962	6.26216	NA	NA	NA
TraesCS1B02G326600	C1	98.1499	34.4439	20.7409	34.0801	42.6618	AT1G53170;AT3G15210;AT5G44210	ERF8;ERF4;ERF9	encodes a member of the ERF (ethylene response factor) subfamily B-1 of ERF/AP2 transcription factor family (ATERF-8). The protein contains one AP2 domain. There are 15 members in this subfamily including ATERF-3, ATERF-4, ATERF-7, and leafy petiole.;Encodes a member of the ERF (ethylene response factor) subfamily B-1 of ERF/AP2 transcription factor family (ATERF-4). The protein contains one AP2 …
TraesCS1B02G326800	C1	3.11841	0.206021	2.06875	1.45436	0.766785	NA	NA	NA
TraesCS1B02G326900	C1	1.82164	0.0663558	0.103571	0.244764	0.0323218	NA	NA	NA
TraesCS1B02G329300	C1	96.1571	54.4617	47.2376	49.8288	36.77	NA	NA	NA
TraesCS1B02G329400	C1	8.30797	3.36276	5.5674	6.03599	6.91387	AT1G11690	AT1G11690	BRANCHLESS TRICHOME-like protein;(source:Araport11)
TraesCS1B02G329711	C1	0.266436	0	0	0	0.0554447	NA	NA	NA
TraesCS1B02G331300	C1	6.57032	1.80585	1.92555	2.41997	1.27548	NA	NA	NA
TraesCS1B02G332100	C1	0.72355	0.304667	0.044854	0	0.0406615	NA	NA	NA
TraesCS1B02G332200	C1	16.1017	11.6415	3.12333	0.112853	0.0421305	AT1G49390;AT5G20400	AT1G49390;AT5G20400	2-oxoglutarate (2OG) and Fe(II)-dependent oxygenase superfamily protein;(source:Araport11);encodes a protein whose sequence is similar to flavanone 3 hydroxylase from Malus. The mRNA is cell-to-cell mobile.
TraesCS1B02G332700	C1	127.179	25.04	11.1256	19.8633	14.2533	AT4G27270;AT5G54500	AT4G27270;FQR1	Quinone reductase family protein;(source:Araport11);Encodes a flavin mononucleotide-binding flavodoxin-like quinone reductase that is a primary auxin-response gene.
TraesCS1B02G333600	C1	67.1403	43.0619	47.6358	43.5417	44.5552	AT1G11360;AT4G27320;AT5G54430	AT1G11360;PHOS34;ATPHOS32	Adenine nucleotide alpha hydrolases-like superfamily protein;(source:Araport11);Contains a universal stress protein domain. Protein is phosphorylated in response to Phytophthora infestans zoospores and xylanase.;Contains a universal stress protein domain. Protein is phosphorylated in response to Phytophthora infestans zoospores and xylanase.
TraesCS1B02G334100	C1	0.332173	0	0.171183	0.248373	0.221541	AT5G54250	CNGC4	member of Cyclic nucleotide gated channel family, downstream component of the signaling pathways leading to HR resistance. mutant plants exhibit gene-for-gene disease resistance against avirulent Pseudomonas syringae despite the near-complete absence of the hypersensitive response (HR). Salicylic acid accumulation in dnd2 mutants is completely PAD4-independent.
TraesCS1B02G340800	C1	1.06673	0.487241	0.124316	0.169337	0.200988	AT5G67470	FH6	formin homolog 6;(source:Araport11)
TraesCS1B02G341700	C1	57.9517	11.0021	30.6896	6.39926	3.95244	AT5G22470	AT5G22470	PARP3 is one of three canonical PARPs in Arabidopsis.
TraesCS1B02G341900	C1	0.970272	0.423617	0.721146	0.477295	0.78811	AT1G80120;AT3G15810	AT1G80120;AT3G15810	LURP-one-like protein (DUF567);(source:Araport11);LURP-one-like protein (DUF567);(source:Araport11)
TraesCS1B02G345700	C1	1.48221	0.423022	0.0906323	0.413416	0.925642	NA	NA	NA
TraesCS1B02G345800	C1	3.44483	2.40743	2.51228	2.65826	2.733	AT3G01060	AT3G01060	lysine-tRNA ligase;(source:Araport11)
TraesCS1B02G346700	C1	1.36013	0.390012	0.415148	0.589911	0.393802	NA	NA	NA
TraesCS1B02G347600	C1	0.270986	0.0182256	0	0	0	NA	NA	NA
TraesCS1B02G350300	C1	24.1911	0.312235	0.0439627	0.634541	0.323924	NA	NA	NA
TraesCS1B02G350500	C1	1.45915	0.30169	0	0.13957	0.0562558	NA	NA	NA
TraesCS1B02G350600	C1	18.8935	2.59233	6.06916	13.9783	16.0291	AT1G06410	TPS7	Encodes an enzyme putatively involved in trehalose biosynthesis. Though the protein has both trehalose-6-phosphate synthase (TPS)-like and trehalose-6-phosphate phosphatase (TPP)-like domains, neither activity has been detected in enzymatic assays nor has the protein been able to complement yeast TPS or TPP mutants.
TraesCS1B02G351200	C1	22.3844	10.6922	4.84922	6.00539	7.92255	NA	NA	NA
TraesCS1B02G352400	C1	582.446	25.7304	3.3336	25.0333	31.8188	AT1G74310;AT4G14670;AT4G14675	CLPB1;CLPB2;AT4G14675	Encodes ClpB1, which belongs to the Casein lytic proteinase/heat shock protein 100 (Clp/Hsp100) family. Involved in refolding of proteins which form aggregates under heat stress. Also known as AtHsp101. AtHsp101 is a cytosolic heat shock protein required for acclimation to high temperature.;This locus was originally annotated as encoding ClpB2 (also referred to as Hsp92.7), which belongs to the C…
TraesCS1B02G353700	C1	12.574	9.57159	8.25465	9.62102	12.8405	NA	NA	NA
TraesCS1B02G354000	C1	7.5417	2.98668	2.99183	5.22462	4.95597	AT5G23940	DCR	Encodes PERMEABLE LEAVES3 (PEL3), a putative acyl-transferase. Mutation in this locus results in altered trichome phenotype (trcichomes become tangled during leaf expansion). Additional phenotype includes altered cuticle layer.
TraesCS1B02G354500	C1	3.11582	0.335894	0	0.692745	0.21404	AT5G19730	PME53	Pectin lyase-like superfamily protein;(source:Araport11)
TraesCS1B02G355700	C1	25.1814	15.0301	5.80149	6.06361	5.38689	NA	NA	NA
TraesCS1B02G357400	C1	300.895	138.604	160.523	134.293	131.386	NA	NA	NA
TraesCS1B02G357600	C1	356.253	122.491	281.278	221.038	193.187	AT1G07790;AT2G28720;AT2G37470;AT3G09480;AT3G45980;AT3G46030;AT3G53650;AT5G02570;AT5G22880;AT5G59910	HTB1;AT2G28720;AT2G37470;AT3G09480;H2B;HTB11;AT3G53650;AT5G02570;H2B;HTB4	Encodes a histone 2B (H2B) protein.;Histone superfamily protein;(source:Araport11);Histone superfamily protein;(source:Araport11);Histone superfamily protein;(source:Araport11);Encodes a histone 2B (H2B) protein. This protein can be ubiquitinated in planta, and this modification depends on the HUB1 and HUB2 E3 ubiquitin ligases as well as the UBC1 and UBC2 E2 ubiquitin conjugating enzymes. Lysine…
TraesCS1B02G360300	C1	98.9919	53.0469	68.2243	13.5265	7.90787	AT5G07500	TZF6	Encodes an embryo-specific zinc finger transcription factor required for heart-stage embryo formation.
TraesCS1B02G360500	C1	0.282874	0	0	0.0278611	0.02341	NA	NA	NA
TraesCS1B02G360800	C1	48.3484	33.9737	26.9449	32.5496	36.3536	AT1G64090;AT2G46170;AT3G61560;AT4G01230;AT4G11220;AT4G23630;AT5G41600	RTNLB3;RTNLB5;RTNLB6;RTNLB7;RTNLB2;RTNLB1;RTNLB4	Reticulan like protein B3;(source:Araport11);Reticulon family protein;(source:Araport11);Reticulon family protein;(source:Araport11);Reticulon family protein. Mutants are resistant to agrobacterium infection.;VIRB2-interacting protein 2;(source:Araport11);VIRB2-interacting protein 1;(source:Araport11);VIRB2-interacting protein 3;(source:Araport11)
TraesCS1B02G360900	C1	1.2683	0.123562	0.0169708	0.19365	0.160666	AT1G07240;AT1G07250;AT1G07260;AT2G29710;AT2G29730;AT2G29740;AT2G29750;AT3G21750;AT3G21760;AT3G21780;AT3G21790;AT3G21800;AT4G15260;AT4G15270;AT4G15280	UGT71C5;UGT71C4;UGT71C3;UGT71D2;UGT71D1;UGT71C2;UGT71C1;UGT71B1;UGT71B2;UGT71B6;UGT71B7;UGT71B8;AT4G15260;AT4G15270;UGT71B5	Encodes a UDP-glucosyltransferase that plays a role in abscisic acid (ABA) glucosylation from ABA to ABA-glucose ester and regulates ABA homeostasis, thereby influencing the ABA signal network.;UDP-glucosyl transferase 71C4;(source:Araport11);Encodes a uridine diphosphate-glycosyltransferase that acts on methyl salicylate (MeSA) to form MeSA glucosides in vitro and in vivo and facilitates negativ…
TraesCS1B02G361400	C1	31.3127	26.9507	14.2311	18.1171	12.3944	NA	NA	NA
TraesCS1B02G361500	C1	17.9741	3.34971	0.851337	3.63211	4.20573	NA	NA	NA
TraesCS1B02G362100	C1	1.27475	0.232082	0.140042	0.0599845	0	NA	NA	NA
TraesCS1B02G363400	C1	12.0998	9.20483	8.83103	9.85055	8.46628	AT2G20120;AT2G20130	COV1;LCV1	Encodes an integral membrane protein of unknown function, highly conserved between plants and bacteria; is likely to be involved in a mechanism that negatively regulates the differentiation of vascular tissue in the stem. Mutants display a dramatic increase in vascular tissue development in the stem in place of the interfascicular region that normally separates the vascular bundles.;like COV 1;(s…
TraesCS1B02G364400	C1	5.59538	2.12246	2.19316	4.22659	4.14319	NA	NA	NA
TraesCS1B02G365100	C1	0.850233	0	0	0.143291	0	NA	NA	NA
TraesCS1B02G366100	C1	14.6416	9.11387	7.02978	8.52257	5.26191	AT1G28240;AT1G53040	AT1G28240;AT1G53040	strawberry notch protein (DUF616);(source:Araport11);tRNA (met) cytidine acetyltransferase, putative (DUF616);(source:Araport11)
TraesCS1B02G368500	C1	3.52601	2.45425	2.84857	2.56329	2.61292	AT4G18240	SS4	Encodes a starch synthase. In Arabidopsis leaves, the catalytic C-terminal region of STARCH SYNTHASE 4 promotes starch granule initiation while its non-catalytic N-terminal region determines starch granules morphology.
TraesCS1B02G369400	C1	3.68907	2.3699	2.6845	3.34823	2.5873	AT3G61770	AT3G61770	Acid phosphatase/vanadium-dependent haloperoxidase-related protein;(source:Araport11)
TraesCS1B02G370500	C1	1.94201	0.206432	0.402162	0.910344	1.04971	AT1G64480	CBL8	calcineurin B-like protein 8, member of plant-specific family of calcium sensor proteins containing 3 EF-hand motifs
TraesCS1B02G371100	C1	12.7698	5.48761	4.88524	6.3251	5.30682	AT1G15280;AT1G80000	AT1G15280;MLN51	CASC3/Barentsz eIF4AIII binding protein;(source:Araport11);CASC3/Barentsz eIF4AIII binding protein;(source:Araport11)
TraesCS1B02G371300	C1	9.07932	6.42153	4.60568	6.43931	4.77766	AT3G18170;AT3G18180	AT3G18170;AT3G18180	Glycosyltransferase family 61 protein;(source:Araport11);Glycosyltransferase family 61 protein;(source:Araport11)
TraesCS1B02G371600	C1	61.6005	43.2106	33.4863	61.0806	51.614	NA	NA	NA
TraesCS1B02G371900	C1	9.52579	1.77035	0.58156	2.31882	1.68745	AT3G01900;AT3G48520;AT5G63450	CYP94B2;CYP94B3;CYP94B1	member of CYP94B;CYP94B3 is a jasmonoyl-isoleucine-12-hydroxylase that catalyzes the formation of 12-OH-JA-Ile from JA-Ile. By reducing the levels of this the biologically active phytohormone, CYP94B3 attenuates the jasmonic acid signaling cascade. CYP94B3 transcript levels rise in response to wounding.;AtWRKY33 regulates root apoplastic barrier formation by controlling AtCYP94B1 leading to incre…
TraesCS1B02G374200	C1	90.3708	74.155	77.7821	70.3436	66.2854	AT3G01280;AT5G15090;AT5G37610	VDAC1;VDAC3;AT5G37610	Encodes a voltage-dependent anion channel (VDAC: AT3G01280/VDAC1, AT5G67500/VDAC2, AT5G15090/VDAC3, AT5G57490/VDAC4, AT5G15090/VDAC5). VDACs are reported to be porin-type, beta-barrel diffusion pores. They are prominently localized in the outer mitochondrial membrane and are involved in metabolite exchange between the organelle and the cytosol. The mRNA is cell-to-cell mobile.;Encodes a voltage-d…
TraesCS1B02G375100	C1	9.56328	4.89717	5.53873	3.63125	3.82727	AT1G17550;AT1G72770	HAB2;HAB1	Protein Phosphatase 2C;mutant has ABA hypersensitive inhibition of seed germination; Protein Phosphatase 2C; regulates the activation of the Snf1-related kinase OST1 by abscisic acid. The mRNA is cell-to-cell mobile.
TraesCS1B02G375400	C1	8.62774	1.14736	0.195047	0.200995	0.274469	NA	NA	NA
TraesCS1B02G376400	C1	103.856	29.7507	84.1378	78.5574	70.4648	NA	NA	NA
TraesCS1B02G378400	C1	1227	544.264	1004.28	725.64	831.502	NA	NA	NA
TraesCS1B02G378500	C1	430.13	137.587	234.598	194.201	191.055	NA	NA	NA
TraesCS1B02G379700	C1	0.714781	0	0	0	0.119214	AT5G11950;AT5G26140	LOG8;LOG9	Encodes a protein of unknown function. It has been crystallized and shown to be structurally almost identical to the protein encoded by At2G37210.;Putative lysine decarboxylase family protein;(source:Araport11)
TraesCS1B02G380000	C1	1.2236	0.598249	0.129712	0	0.126352	AT3G21330	BHLH87	basic helix-loop-helix (bHLH) DNA-binding superfamily protein;(source:Araport11)
TraesCS1B02G380200	C1	223.357	113.626	201.363	160.396	164.215	NA	NA	NA
TraesCS1B02G380300	C1	14.0894	8.43985	8.08502	8.68311	7.34741	AT1G26670;AT3G29100;AT5G39510;AT5G39630	VTI12;VTI13;VTI11;AT5G39630	member of VTI1 Gene Family. Normally localizes to the transgolgi network and plasma membrane. A dominant mutation (zip1) alters the subcellular localization of VTI12 and suppresses loss of function mutation (zag1) of VTI11. Interacts with members of the SYP family. Involved in protein trafficking to protein storage vacuoles.;Encodes a member of the Arabidopsis v-SNARE (vesicle soluble NSF attachm…
TraesCS1B02G380500	C1	6.98192	6.65951	3.48532	3.59783	2.01239	NA	NA	NA
TraesCS1B02G381200	C1	3043.95	1202.59	849.253	230.728	138.18	NA	NA	NA
TraesCS1B02G382100	C1	1.00136	0.790818	0.489457	0.30065	0.076255	NA	NA	NA
TraesCS1B02G382700	C1	0.255964	0	0	0	0	NA	NA	NA
TraesCS1B02G384100	C1	26.0483	9.51226	13.0212	13.6039	12.0173	AT2G21510;AT4G39150	AT2G21510;AT4G39150	DNAJ heat shock N-terminal domain-containing protein;(source:Araport11);DNAJ heat shock N-terminal domain-containing protein;(source:Araport11)
TraesCS1B02G384500	C1	5.89842	2.53874	0.858555	2.08013	0.963015	AT1G19650;AT1G75370;AT2G21520;AT4G39170	SFH4;AT1G75370;AT2G21520;SFH6	Sec14p-like phosphatidylinositol transfer family protein;(source:Araport11);Sec14p-like phosphatidylinositol transfer family protein;(source:Araport11);Sec14p-like phosphatidylinositol transfer family protein;(source:Araport11);Sec14p-like phosphatidylinositol transfer family protein;(source:Araport11)
TraesCS1B02G384700	C1	9.31956	0.617176	0.366247	0.240067	0.188883	AT1G05100;AT2G32510;AT4G26890;AT5G55090	MAPKKK18;MAPKKK17;MAPKKK16;MAPKKK15	member of MEKK subfamily. Negatively regulated by RGLG1 and RGLG2; involved in drought stress tolerance.;Member of MEKK subfamily involved in wound and JA induced signaling.Interacts with At5g40440, and activates At1g59580.;Member of MEKK subfamily. Involved in wound response signaling. Interacts with At5g40440, and activates At1g59580.;member of MEKK subfamily
TraesCS1B02G384900	C1	34.333	0.16209	0.111979	0.164209	0.238836	AT1G05100;AT2G32510;AT4G26890;AT5G55090	MAPKKK18;MAPKKK17;MAPKKK16;MAPKKK15	member of MEKK subfamily. Negatively regulated by RGLG1 and RGLG2; involved in drought stress tolerance.;Member of MEKK subfamily involved in wound and JA induced signaling.Interacts with At5g40440, and activates At1g59580.;Member of MEKK subfamily. Involved in wound response signaling. Interacts with At5g40440, and activates At1g59580.;member of MEKK subfamily
TraesCS1B02G385000	C1	2.64666	0.0925942	0	0.0794483	0.0352019	AT1G05100;AT2G32510;AT4G26890;AT5G55090	MAPKKK18;MAPKKK17;MAPKKK16;MAPKKK15	member of MEKK subfamily. Negatively regulated by RGLG1 and RGLG2; involved in drought stress tolerance.;Member of MEKK subfamily involved in wound and JA induced signaling.Interacts with At5g40440, and activates At1g59580.;Member of MEKK subfamily. Involved in wound response signaling. Interacts with At5g40440, and activates At1g59580.;member of MEKK subfamily
TraesCS1B02G385100	C1	6.75019	0.129019	0	0.0881659	0.227065	AT1G05100;AT2G32510;AT4G26890;AT5G55090	MAPKKK18;MAPKKK17;MAPKKK16;MAPKKK15	member of MEKK subfamily. Negatively regulated by RGLG1 and RGLG2; involved in drought stress tolerance.;Member of MEKK subfamily involved in wound and JA induced signaling.Interacts with At5g40440, and activates At1g59580.;Member of MEKK subfamily. Involved in wound response signaling. Interacts with At5g40440, and activates At1g59580.;member of MEKK subfamily
TraesCS1B02G385200	C1	23.9996	0.127661	0.0665905	0.233958	0.395406	AT1G05100;AT2G32510;AT4G26890;AT5G55090	MAPKKK18;MAPKKK17;MAPKKK16;MAPKKK15	member of MEKK subfamily. Negatively regulated by RGLG1 and RGLG2; involved in drought stress tolerance.;Member of MEKK subfamily involved in wound and JA induced signaling.Interacts with At5g40440, and activates At1g59580.;Member of MEKK subfamily. Involved in wound response signaling. Interacts with At5g40440, and activates At1g59580.;member of MEKK subfamily
TraesCS1B02G385300	C1	31.1507	0.152057	0.25379	0.159714	0.372843	AT1G05100;AT2G32510;AT4G26890;AT5G55090	MAPKKK18;MAPKKK17;MAPKKK16;MAPKKK15	member of MEKK subfamily. Negatively regulated by RGLG1 and RGLG2; involved in drought stress tolerance.;Member of MEKK subfamily involved in wound and JA induced signaling.Interacts with At5g40440, and activates At1g59580.;Member of MEKK subfamily. Involved in wound response signaling. Interacts with At5g40440, and activates At1g59580.;member of MEKK subfamily
TraesCS1B02G386200	C1	559.246	153.441	376.349	314.998	308.906	AT1G07790;AT2G28720;AT2G37470;AT3G09480;AT3G45980;AT3G46030;AT3G53650;AT5G02570;AT5G22880;AT5G59910	HTB1;AT2G28720;AT2G37470;AT3G09480;H2B;HTB11;AT3G53650;AT5G02570;H2B;HTB4	Encodes a histone 2B (H2B) protein.;Histone superfamily protein;(source:Araport11);Histone superfamily protein;(source:Araport11);Histone superfamily protein;(source:Araport11);Encodes a histone 2B (H2B) protein. This protein can be ubiquitinated in planta, and this modification depends on the HUB1 and HUB2 E3 ubiquitin ligases as well as the UBC1 and UBC2 E2 ubiquitin conjugating enzymes. Lysine…
TraesCS1B02G386400	C1	568.027	117.244	341.402	291.78	309.734	AT1G07790;AT2G28720;AT2G37470;AT3G09480;AT3G45980;AT3G46030;AT3G53650;AT5G02570;AT5G22880;AT5G59910	HTB1;AT2G28720;AT2G37470;AT3G09480;H2B;HTB11;AT3G53650;AT5G02570;H2B;HTB4	Encodes a histone 2B (H2B) protein.;Histone superfamily protein;(source:Araport11);Histone superfamily protein;(source:Araport11);Histone superfamily protein;(source:Araport11);Encodes a histone 2B (H2B) protein. This protein can be ubiquitinated in planta, and this modification depends on the HUB1 and HUB2 E3 ubiquitin ligases as well as the UBC1 and UBC2 E2 ubiquitin conjugating enzymes. Lysine…
TraesCS1B02G388600	C1	0.504052	0	0	0	0	AT4G27970	SLAH2	Encodes a protein with ten predicted transmembrane helices. The SLAH2 protein has similarity to the SLAC1 protein involved in ion homeostasis in guard cells. But, it is not expressed in guard cells and cannot complement a slac1-2 mutant suggesting that it performs a different function. SLAH2:GFP localizes to the plasma membrane.
TraesCS1B02G388700	C1	52.6442	12.8855	3.23179	2.84722	2.30124	AT1G48600;AT1G73600;AT3G18000	NMT2;AT1G73600;NMT1	Encodes a phosphoethanolamine N-methyltransferase that catalyses the last two methylation steps of the three sequential methylations of phosphoethanolamine (PEA) that are required for the synthesis of phosphocholine (PCho) in plants.;Encodes a S-adenosyl-L-methionine-dependent phosphoethanolamine N-methyltransferase whose expression is responsive to both phosphate (Pi) and phosphite (Phi) in root…
TraesCS1B02G388800	C1	31.8187	25.1371	20.0336	23.9315	19.06	AT1G14910;AT2G01600	AT1G14910;AT2G01600	ANTH domain-containing protein which functions as adaptor protein for clathrin-mediated endocytosis (CME) of the secretory vesicle-associated longintype R-SNARE VAMP72 group. Interacts with the SNARE domain of VAMP72 and clathrin at the plasma membrane. Required for recycling of R-SNARE proteins.;ANTH domain-containing protein which functions as adaptor protein for clathrin-mediated endocytosis (…
TraesCS1B02G389100	C1	5.8131	5.36262	3.92643	3.75314	5.20025	AT5G60335	AT5G60335	Encodes the mitochondria-localized 3-hydroxyacyl-acyl carrier protein (ACP) dehydratase (mtHD) component of the mitochondrial fatty acid synthase (mtFAS) system. It catalyzes the third of the four iterative reactions that constitute the mtFAS cycle. Additionally, it supports the assembly of lipid A-like molecules and has an unexpected function in maintaining the morphology of chloroplastic starch…
TraesCS1B02G389700	C1	56.5887	0.0263175	0.0303183	0.063748	0.0282454	AT4G34410	ERF109	Encodes a member of the ERF (ethylene response factor) subfamily B-3 of ERF/AP2 transcription factor family. The protein contains one AP2 domain. There are 18 members in this subfamily including ATERF-1, ATERF-2, AND ATERF-5. Regulates programmed cell death (PCD) inhibitor genes. Involved in retarding programmed cell death under salt stress due to the regulation of processes participating in ROS …
TraesCS1B02G389900	C1	2.59324	0	0	0	0	AT4G34410	ERF109	Encodes a member of the ERF (ethylene response factor) subfamily B-3 of ERF/AP2 transcription factor family. The protein contains one AP2 domain. There are 18 members in this subfamily including ATERF-1, ATERF-2, AND ATERF-5. Regulates programmed cell death (PCD) inhibitor genes. Involved in retarding programmed cell death under salt stress due to the regulation of processes participating in ROS …
TraesCS1B02G391900	C1	64.1658	59.6685	52.3547	46.5442	36.0916	AT1G72810;AT4G29840	TS2;TS1	Pyridoxal-5-phosphate-dependent enzyme family protein;(source:Araport11);threonine synthase
TraesCS1B02G395100	C1	0.574451	0.130736	0.25663	0.406347	0.218276	NA	NA	NA
TraesCS1B02G396000	C1	249.496	6.87572	5.3871	21.5157	16.0032	AT3G22830;AT3G51910;AT3G63350;AT5G43840	HSFA6B;HSFA7A;HSFA7B;HSFA6A	member of Heat Stress Transcription Factor (Hsf) family;member of Heat Stress Transcription Factor (Hsf) family The mRNA is cell-to-cell mobile.;member of Heat Stress Transcription Factor (Hsf) family;member of Heat Stress Transcription Factor (Hsf) family
TraesCS1B02G399300	C1	10.4495	0.0876325	0.230967	0.220754	0.244175	NA	NA	NA
TraesCS1B02G403900	C1	126.427	0.721533	0.479204	0.547474	0.879466	NA	NA	NA
TraesCS1B02G404000	C1	15.4679	2.05123	5.05221	5.66679	3.48064	AT1G15110	AT1G15110	PSS1 encodes a base-exchange-type Phosphatidylserine (PS) synthase. Mutant analysis revealed its role in pollen maturation.
TraesCS1B02G409300	C1	1.58731	1.05054	0.137915	0.490438	0.644621	AT4G32590	AT4G32590	2Fe-2S ferredoxin-like superfamily protein;(source:Araport11)
TraesCS1B02G413400	C1	1.0065	0	0	0	0	AT1G30840	PUP4	Member of a family of proteins related to PUP1, a purine transporter. May be involved in the transport of purine and purine derivatives such as cytokinins, across the plasma membrane.
TraesCS1B02G414300	C1	8.65328	4.48227	7.28978	6.7667	7.65631	AT2G43800;AT3G07540;AT3G25493;AT3G25500;AT5G48360	FH2;FH10;AT3G25493;FH1;FH9	Localizes to plasmodesmata (PD) through its transmembrane domain and is required for normal intercellular trafficking. Functions in a partially redundant manner with its closest homolog AtFH1. Regulates PD's permeability by anchoring actin filaments to PD. Caps the barbed end of actin filaments and stabilizes them in vitro.;Actin-binding FH2 (formin homology 2) family protein;(source:Araport11);f…
TraesCS1B02G414800	C1	4.17646	2.97313	2.64059	2.43285	1.66223	AT3G12700	NANA	Encodes an aspartic protease has an important regulatory function in chloroplasts that not only influences photosynthetic carbon metabolism but also plastid and nuclear gene expression.
TraesCS1B02G415100	C1	1.85018	0.31867	0.44493	0.304343	0.546795	NA	NA	NA
TraesCS1B02G415500	C1	8.78159	5.99542	6.40866	7.25938	6.66963	AT1G53023;AT1G53025;AT3G15355	UBC39;AT1G53025;UBC25	Ubiquitin-conjugating enzyme family protein;(source:Araport11);Ubiquitin-conjugating enzyme family protein;(source:Araport11);ubiquitin-conjugating enzyme 25;(source:Araport11)
TraesCS1B02G418600	C1	4.1913	2.47566	2.45976	3.88098	3.82088	AT3G07310;AT5G48590	AT3G07310;AT5G48590	phosphoserine aminotransferase, putative (DUF760);(source:Araport11);phosphoserine aminotransferase, putative (DUF760);(source:Araport11)
TraesCS1B02G419300	C1	3.98051	1.32544	0.213862	0.241194	0.240393	NA	NA	NA
TraesCS1B02G420500	C1	5.94756	3.23406	3.37798	5.04702	5.2607	NA	NA	NA
TraesCS1B02G420800	C1	1.83689	0.480202	0	0.141136	1.1809	NA	NA	NA
TraesCS1B02G422400	C1	8.75177	3.85186	3.54875	3.35668	4.03805	AT4G28300	AT4G28300	Encodes a protein with 13.6% proline amino acids that is predicted to localize to the cell wall. The mRNA is cell-to-cell mobile.
TraesCS1B02G423600	C1	369.646	25.908	12.5245	29.9532	31.0791	NA	NA	NA
TraesCS1B02G424500	C1	2.59979	0.93931	0.802704	1.72036	1.81153	NA	NA	NA
TraesCS1B02G426200	C1	20.7084	12.4443	7.17052	6.64599	5.94546	AT1G53190;AT3G15070	AT1G53190;AT3G15070	Encodes a RING-type E3 ligase that positively regulates CIN-like TCP activity to promote leaf development by mediating the degradation of the TCP repressor TIE1.;Encodes a RING-type E3 ligase that positively regulates CIN-like TCP activity to promote leaf development by mediating the degradation of the TCP repressor TIE1.
TraesCS1B02G429800	C1	0.137994	0	0	0	0	NA	NA	NA
TraesCS1B02G430500	C1	2.78073	1.0301	0.911096	1.45481	1.53323	AT1G80870	AT1G80870	Protein kinase superfamily protein;(source:Araport11)
TraesCS1B02G430700	C1	0.958698	0.654568	0.892234	0.280349	0.530883	NA	NA	NA
TraesCS1B02G431400	C1	9.29546	5.56776	4.88483	8.8133	6.61567	NA	NA	NA
TraesCS1B02G431700	C1	0.424084	0	0	0	0.113286	AT1G06250;AT4G18550	AT1G06250;AT4G18550	alpha/beta-Hydrolases superfamily protein;(source:Araport11);DSEL is cytosolic acylhydrolase that shows prefential lipase activity against the sn-1 position of several classes of lipids, including 1,3-diacylglycerols and 1-monoacylglycerols. Overexpression of DSEL leads to increased peroxisome and oil body levels in cotyledons and reduced beta-oxidation activity in seedlings.
TraesCS1B02G432400	C1	27.0848	9.44382	9.82505	13.1685	11.767	AT1G29390;AT1G29395	COR413IM2;COR413IM1	Integral membrane protein in the inner envelope of chloroplasts. Provide freezing tolerance.;Integral membrane protein in the inner envelope of chloroplasts. Provide freezing tolerance. Expression is induced by short-term cold-treatment, water deprivation, and abscisic acid treatment. involved in response to salt tolerance
TraesCS1B02G432500	C1	67.217	68.8719	26.6653	15.2264	17.2344	NA	NA	NA
TraesCS1B02G434100	C1	0.4326	0.0103441	0	0	0	AT1G32940;AT1G32950;AT1G32960;AT1G32970;AT1G32980;AT1G66210;AT1G66220;AT4G10510;AT4G10520;AT4G10530;AT4G10540;AT4G10550;AT4G21323;AT4G21326;AT4G21630;AT4G21640;AT4G21650;AT5G11940	SBT3.5;SBT3.4;SBT3.3;SBT3.2;AT1G32980;SBT3.16;SBT3.17;SBT3.7;SBT3.9;AT4G10530;SBT3.8;AT4G10550;AT4G21323;ATSBT3.12;SBT3.14;AT4G21640;SBT3.13;SBT3.11	Subtilase family protein;(source:Araport11);Subtilase family protein;(source:Araport11);Subtilase family protein;(source:Araport11);Subtilisin-like serine endopeptidase family protein;(source:Araport11);Subtilisin-like serine endopeptidase family protein;(source:Araport11);Subtilisin-like serine endopeptidase family protein;(source:Araport11);Subtilase family protein;(source:Araport11);Subtilase …
TraesCS1B02G434600	C1	2.04896	0.0651595	0.0672057	0.0325567	0	NA	NA	NA
TraesCS1B02G434700	C1	1.17	0	0	0	0	NA	NA	NA
TraesCS1B02G434800	C1	1.1024	0.048453	0	0	0	NA	NA	NA
TraesCS1B02G435000	C1	19.8664	0	0	0	0	NA	NA	NA
TraesCS1B02G435200	C1	8.02939	0	0	0	0	NA	NA	NA
TraesCS1B02G435500	C1	1.40768	0.450335	0.516794	0.364138	0	NA	NA	NA
TraesCS1B02G435700	C1	0.660995	0.336329	0.0915251	0.132494	0.116248	AT1G19450;AT1G75220	AT1G19450;AT1G75220	Major facilitator superfamily protein;(source:Araport11);Encodes a vacuolar glucose exporter that is induced in response to factors that activate vacuolar glucose pools like darkness, heat stress and wounding and repressed during conditions that trigger glucose accumulation in the vacuole like cold stress and external sugar supply.
TraesCS1B02G437000	C1	0.68876	0.658357	0.0310235	0	0.0311719	NA	NA	NA
TraesCS1B02G439700	C1	9.6734	7.97887	7.19968	7.12707	9.48604	AT5G52960	AT5G52960	tRNA dimethylallyltransferase;(source:Araport11)
TraesCS1B02G440600	C1	1.53286	0.0851816	0.258276	0.356899	0.611742	AT2G46400	WRKY46	Encodes a WRKY transcription factor that contributes to the feedforward inhibition of osmotic/salt stress-dependent LR inhibition via regulation of ABA signaling and auxin homeostasis.
TraesCS1B02G440800	C1	2.82048	2.53225	1.50801	2.21655	2.55733	AT1G64355	AT1G64355	1-acyl-sn-glycerol-3-phosphate acyltransferase;(source:Araport11)
TraesCS1B02G442000	C1	13.3859	7.83299	8.94625	10.7465	8.33176	AT2G37060;AT2G38880;AT3G53340	NFYB8;NF-YB1;NFYB10	nuclear factor Y, subunit B8;(source:Araport11);Encodes a transcription factor from the nuclear factor Y (NF-Y) family, AtNF-YB1. Confers drought tolerance.;nuclear factor Y, subunit B10;(source:Araport11)
TraesCS1B02G443200	C1	223.378	157.327	162.851	125.293	107.533	AT1G53240;AT3G15020	mMDH1;mMDH2	mMDH1 encodes a mitochrondrial malate dehydrogenase. It is expressed at higher levels than the other mitochrondrial isoform mMDH2 (At3G15020) according to transcript and proteomic analyses.;Lactate/malate dehydrogenase family protein;(source:Araport11)
TraesCS1B02G443700	C1	16.6839	0.420687	0.0366956	0.296605	0.035308	NA	NA	NA
TraesCS1B02G444400	C1	1.19669	0.76838	0.185248	0.373789	0.160986	AT1G66810	AT1G66810	Encodes a tandem CCCH zinc finger (TZF) protein that can bind DNA and RNA, function as a transcriptional activator, and is involved in secondary wall biosynthesis.
TraesCS1B02G445100	C1	121.029	6.93322	18.0922	3.61158	0.633082	NA	NA	NA
TraesCS1B02G445200	C1	0.119521	0.00795168	0.0177998	0.0240155	0.0165555	NA	NA	NA
TraesCS1B02G445400	C1	0.203808	0	0	0	0	AT1G23080;AT1G70940;AT2G01420	PIN7;PIN3;PIN4	Encodes a novel component of auxin efflux that is located apically in the basal cell and is involved during embryogenesis in setting up the apical-basal axis in the embryo. It is also involved in pattern specification during root development. In roots, it is expressed at lateral and basal membranes of provascular cells in the meristem and elongation zone, whereas in the columella cells it coincid…
TraesCS1B02G446000	C1	1.75872	0.933993	0.429336	0.543104	1.16646	AT3G25640;AT5G23100	AT3G25640;AT5G23100	MIZU-KUSSEI-like protein (Protein of unknown function, DUF617);(source:Araport11);MIZU-KUSSEI-like protein (Protein of unknown function, DUF617);(source:Araport11)
TraesCS1B02G446400	C1	10.6292	0.74023	0.852632	0.845465	1.24249	AT1G18530;AT3G25600	CML15;CML16	Calmodulin like protein. Paralog of CML16. Expression in flowers is restricted to anthers and mature pollen.;Calmodulin like protein. Paralog of CML15.
TraesCS1B02G446900	C1	1264.16	10.2925	2.42605	3.24238	2.19329	AT3G10020	AT3G10020	plant/protein;(source:Araport11)
TraesCS1B02G451900	C1	0.418547	0.0294463	0	0.140266	0.0963908	AT2G42900	AT2G42900	Plant basic secretory protein (BSP) family protein;(source:Araport11)
TraesCS1B02G456200	C1	0.41909	0.304749	0.108191	0.0428343	0.179351	AT4G27970	SLAH2	Encodes a protein with ten predicted transmembrane helices. The SLAH2 protein has similarity to the SLAC1 protein involved in ion homeostasis in guard cells. But, it is not expressed in guard cells and cannot complement a slac1-2 mutant suggesting that it performs a different function. SLAH2:GFP localizes to the plasma membrane.
TraesCS1B02G456500	C1	5.22252	0	0	0.193926	0.197995	AT4G27970	SLAH2	Encodes a protein with ten predicted transmembrane helices. The SLAH2 protein has similarity to the SLAC1 protein involved in ion homeostasis in guard cells. But, it is not expressed in guard cells and cannot complement a slac1-2 mutant suggesting that it performs a different function. SLAH2:GFP localizes to the plasma membrane.
TraesCS1B02G456700	C1	23.2243	8.41112	8.69471	14.4428	16.9814	AT4G23650	CPK3	Encodes calcium dependent protein kinase 3 (CPK3), a member of the Arabidopsis CDPK gene family. CDPKs contain an intrinsic Ca2+-activation domain with four EF hand Ca2+-binding sites. CDPKs protein kinases have been proposed to function in multiple plant signal transduction pathways downstream of [Ca2+]cyt elevations, thus transducing various physiological responses. CPK3 is expressed in both gu…
TraesCS1B02G459500	C1	32.7089	14.1177	7.13322	2.81244	1.67907	AT2G46370	JAR1	Encodes a jasmonate-amido synthetase that is a member of the GH3 family of proteins. JAR1 catalyzes the formation of a biologically active jasmonyl-isoleucine (JA-Ile) conjugate. JA-Ile promotes the interaction between JAZ1 and COI1 in the jasmonate signaling pathway. JAR1 localizes to the cytoplasm and is also a phytochrome A signaling component. JAR1 is an auxin-induced gene. Loss of function m…
TraesCS1B02G459600	C1	5.07313	1.97099	3.44353	3.11648	3.20423	AT1G01440;AT2G46380;AT3G61670;AT4G01090	AT1G01440;AT2G46380;AT3G61670;AT4G01090	hypothetical protein (DUF3133);(source:Araport11);extra-large G-like protein, putative (DUF3133);(source:Araport11);extra-large G-like protein, putative (DUF3133);(source:Araport11);Hypothetical protein; participates in wound-induced lateral root development.
TraesCS1B02G465000	C1	12.4984	9.21462	7.66441	12.9332	10.3979	AT2G18190;AT2G18193;AT3G29800;AT5G17730;AT5G17740;AT5G17750;AT5G17760	AT2G18190;AT2G18193;AT3G29800;AT5G17730;AT5G17740;AT5G17750;AT5G17760	P-loop containing nucleoside triphosphate hydrolases superfamily protein;(source:Araport11);P-loop containing nucleoside triphosphate hydrolases superfamily protein;(source:Araport11);P-loop containing nucleoside triphosphate hydrolases superfamily protein;(source:Araport11);P-loop containing nucleoside triphosphate hydrolases superfamily protein;(source:Araport11);P-loop containing nucleoside tr…
TraesCS1B02G468900	C1	1.35167	0.756929	1.05221	1.05302	1.22281	AT1G55200;AT3G13690;AT5G56790	AT1G55200;AT3G13690;AT5G56790	kinase with adenine nucleotide alpha hydrolases-like domain-containing protein;(source:Araport11);kinase with adenine nucleotide alpha hydrolases-like domain-containing protein;(source:Araport11);Protein kinase superfamily protein;(source:Araport11)
TraesCS1B02G471300	C1	0.212461	0	0	0	0.0445444	AT5G06300	LOG7	Putative lysine decarboxylase family protein;(source:Araport11)
TraesCS1B02G472200	C1	39.5004	13.9839	10.8398	17.8013	11.635	AT5G15120;AT5G39890	PCO1;PCO2	2-aminoethanethiol dioxygenase, putative (DUF1637);(source:Araport11);Plant Cysteine Oxidase (PCO). Involved in controlling the stability of Group VII ethylene response factors (ERF-VIIs) via N-Arg/degron pathway through catalyzing the oxidation of their N-Cys for subsequent Arginyl-tRNA--protein transferase 1 (ATE1) mediated arginine installation.
TraesCS1B02G476000	C1	0.547181	0.454397	0.195034	0.152395	0.164408	AT2G25640;AT3G29639;AT5G11430;AT5G25520	AT2G25640;AT3G29639;AT5G11430;AT5G25520	SPOC domain / Transcription elongation factor S-II protein;(source:Araport11);hypothetical protein;(source:Araport11);SPOC domain / Transcription elongation factor S-II protein;(source:Araport11);SPOC domain / Transcription elongation factor S-II protein;(source:Araport11)
TraesCS1B02G478400	C1	67.0361	7.15929	4.25886	11.3733	6.31875	AT1G64440;AT4G10960;AT4G23920	UGE4;UGE5;UGE2	Encodes a protein with UDP-D-glucose 4-epimerase activity. Mutants in RHD1 have abnormally shaped root hairs with a bulbous region at the base. Allelic to REB1 encoding a UDP-D-glucose 4-epimerase involved in cell wall biosynthesis.Involved in growth and cell wall carbohydrate biosynthesis.;Encodes a protein with UDP-D-glucose 4-epimerase activity.;Encodes a protein with UDP-D-glucose 4-epimerase…
TraesCS1B02G481300	C1	1.96002	0.219567	0.0293052	0.206611	0.0286436	NA	NA	NA
TraesCS1B02G481500	C1	2.83341	0.268858	0	0.0449604	0.253	NA	NA	NA
TraesCS1D02G000200	C1	0.31964	0	0	0	0	NA	NA	NA
TraesCS1D02G000300	C1	0.438344	0	0	0	0	NA	NA	NA
TraesCS1D02G001200	C1	0.398007	0	0	0	0	NA	NA	NA
TraesCS1D02G002200	C1	16.5475	11.5588	13.6867	12.589	14.9489	NA	NA	NA
TraesCS1D02G005800	C1	1.90691	0.992017	0.516414	0.945593	0.522256	NA	NA	NA
TraesCS1D02G007700	C1	13.0817	10.3462	9.49364	11.0521	8.30535	AT1G53280;AT3G14990	DJ1B;DJ1A	Encodes a homolog of animal DJ-1 superfamily protein. In the A. thaliana genome, three genes encoding close homologs of human DJ-1 were identified AT3G14990 (DJ1A), AT1G53280 (DJ1B) and AT4G34020 (DJ1C). Among the three homologs, DJ1C is essential for chloroplast development and viability. It exhibits glyoxalase activity towards glyoxal and methylglyoxal.;Encodes a homolog of animal DJ-1 superfam…
TraesCS1D02G007800	C1	5.44983	2.51185	3.11243	4.17618	3.10863	NA	NA	NA
TraesCS1D02G009400	C1	0.351392	0	0	0	0	NA	NA	NA
TraesCS1D02G009800	C1	0.164494	0.0590238	0	0	0.0649316	AT1G15150;AT1G15160;AT1G15170;AT1G15180;AT1G64820;AT1G66760;AT1G66780;AT1G71140;AT2G04040;AT2G04050;AT2G04066;AT2G04070;AT2G04080;AT2G04090;AT2G04100	DTX10;DTX11;DTX12;DTX13;DTX7;DTX9;DTX8;DTX14;DTX1;DTX3;AT2G04066;DTX4;DTX2;DTX5;DTX6	MATE efflux family protein;(source:Araport11);MATE efflux family protein;(source:Araport11);MATE efflux family protein;(source:Araport11);MATE efflux family protein;(source:Araport11);MATE efflux family protein;(source:Araport11);MATE efflux family protein;(source:Araport11);MATE efflux family protein;(source:Araport11);MATE transporter that can export the antibiotic norfloxacin.;AtDTX1 (At2g0404…
TraesCS1D02G011100	C1	0.353575	0	0	0.0520097	0.183579	NA	NA	NA
TraesCS1D02G012000	C1	301.065	147.775	40.1867	1.52524	1.22371	NA	NA	NA
TraesCS1D02G012100	C1	35.7061	3.49221	32.708	1.74463	1.00917	NA	NA	NA
TraesCS1D02G013000	C1	1.35488	0.0184681	0.0202788	0.320413	0.304904	NA	NA	NA
TraesCS1D02G015100	C1	0.337427	0	0	0	0	NA	NA	NA
TraesCS1D02G019100	C1	1.06804	0	0	0	0	AT5G17030	UGT78D3	UDP-glucosyl transferase 78D3;(source:Araport11)
TraesCS1D02G019200	C1	0.623482	0.0908963	0	0	0	AT5G17030	UGT78D3	UDP-glucosyl transferase 78D3;(source:Araport11)
TraesCS1D02G020000	C1	83.7211	74.4685	63.0965	62.5398	65.0158	AT5G09810	ACT7	Member of Actin gene family.Mutants are defective in germination and root growth. The mRNA is cell-to-cell mobile.
TraesCS1D02G022000	C1	7.41707	4.61699	0.0300931	0.258873	0.120685	NA	NA	NA
TraesCS1D02G022900	C1	12.2478	2.48629	2.47241	4.05296	3.96816	AT5G22450	AT5G22450	SAGA complex subunit. Regulates gene expression by affecting histone H3 acetylation.
TraesCS1D02G027300	C1	1.00497	0	0	0	0	NA	NA	NA
TraesCS1D02G027500	C1	1.69968	0	0	0	0	NA	NA	NA
TraesCS1D02G027700	C1	19.2692	0.636284	0.424035	0.427724	0	NA	NA	NA
TraesCS1D02G027900	C1	17.8048	0.327279	0.562397	0.860528	0.802817	NA	NA	NA
TraesCS1D02G028000	C1	101.635	1.24086	1.44548	1.18513	0	NA	NA	NA
TraesCS1D02G030300	C1	97.696	8.42965	6.42709	13.4769	16.1444	NA	NA	NA
TraesCS1D02G030600	C1	3.27524	2.59239	1.98594	2.49664	2.13535	AT2G37660	AT2G37660	NAD(P)-binding Rossmann-fold superfamily protein;(source:Araport11)
TraesCS1D02G032100	C1	1.89528	0.346324	1.09509	1.25317	1.15766	NA	NA	NA
TraesCS1D02G032800	C1	1.86086	1.09449	1.51119	1.47308	1.51418	NA	NA	NA
TraesCS1D02G034600	C1	5.66549	0.660679	0.0779027	0.411766	0.515541	AT2G41640;AT3G10320;AT3G57380	AT2G41640;AT3G10320;AT3G57380	Glycosyltransferase family 61 protein;(source:Araport11);MUCI21 is a GT61 protein required for the production of highly branched xylan in seed coat mucilage. MUCI21 likely decorates xylan with xylose side chains that seem to be necessary for pectin attachment to the seed surface.;Glycosyltransferase family 61 protein;(source:Araport11)
TraesCS1D02G034700	C1	153.335	17.2463	19.7173	48.4405	42.7475	AT2G28900	OEP161	Encodes AtOEP16, a 16-KDa plastid outer membrane protein involved in plastid import of protochlorophyllide oxidoreductase A. Predominantly expressed in leaves and is also inducible by cold treatment.
TraesCS1D02G034800	C1	5979.38	589.695	187.792	606.421	403.401	NA	NA	NA
TraesCS1D02G036500	C1	13.9225	9.16103	7.83661	6.42983	6.4373	AT2G25430;AT4G32285	AT2G25430;AT4G32285	AP180 N-terminal homology domain, TPLATE complex protein involved in clathrin-mediated endocytosis.;Putative clathrin assembly protein, component of TPLATE complex that functions in clathrin-mediated endocytosis.
TraesCS1D02G036700	C1	2.59936	1.02267	0.0958867	0.190529	0.455157	AT1G07640;AT2G28810;AT2G37590;AT3G55370	OBP2;DOF2.2;DOF2.4;OBP3	A member of the DOF transcription factors. Prominently expressed in the phloem of leaves and other organs. Expression is induced by wounding, MeJA and insect feeding. Upregulates glucosinolate biosynthesis. PEAR protein involved in the formation of a short-range concentration gradient that peaks at protophloem sieve elements, and activates gene expression that promotes radial growth. Locally prom…
TraesCS1D02G037400	C1	2.25608	0.82784	1.08988	0.311458	0.321532	NA	NA	NA
TraesCS1D02G038000	C1	7.13946	2.65704	5.00996	5.2288	4.78013	NA	NA	NA
TraesCS1D02G038900	C1	188.216	91.1039	103.429	22.0802	6.1951	NA	NA	NA
TraesCS1D02G039800	C1	1061.17	362.745	881.444	687.939	607.528	NA	NA	NA
TraesCS1D02G039900	C1	1086.77	332.009	741.879	667.433	667.263	NA	NA	NA
TraesCS1D02G047300	C1	0.206187	0	0	0.0136138	0	AT3G06080;AT5G19160	TBL10;TBL11	Encodes a member of the TBL (TRICHOME BIREFRINGENCE-LIKE) gene family containing a plant-specific DUF231 (domain of unknown function) domain. TBL gene family has 46 members, two of which (TBR/AT5G06700 and TBL3/AT5G01360) have been shown to be involved in the synthesis and deposition of secondary wall cellulose, presumably by influencing the esterification state of pectic polymers. A nomenclature…
TraesCS1D02G047600	C1	11.7006	11.2836	8.62975	9.60088	7.78665	AT3G46220	AT3G46220	E3 ligase that mediates ufmylation. Part of complex with C53 and the ER-resident adaptor protein DDRGK1. Involved in the pathway that links ribosome-associated quality control with selective autophagy at the ER.
TraesCS1D02G047800	C1	3.83206	2.20095	1.86433	4.1464	2.99846	NA	NA	NA
TraesCS1D02G047900	C1	37.4682	26.1991	19.7565	25.5456	15.5921	AT1G07670;AT1G07810	ECA4;ECA1	TPLATE complex protein involved in clathrin-mediated endocytosis.;Encodes an ER-type Ca2+-pumping ATPase. The mRNA is cell-to-cell mobile.
TraesCS1D02G050000	C1	1.55581	0.763493	0	0.0380749	0.307139	NA	NA	NA
TraesCS1D02G050100	C1	0.893482	0.488244	0.0320485	0.0931525	0.288063	NA	NA	NA
TraesCS1D02G052000	C1	1.11636	0.592587	0.149878	0.0380512	0.0600377	AT2G37360;AT2G39350;AT3G53510;AT3G55090;AT3G55100;AT3G55110;AT3G55130;AT5G13580	ABCG2;ABCG1;ABCG20;ABCG16;ABCG17;ABCG18;ABCG19;ABCG6	Belongs to a clade of five Arabidopsis thaliana ABCG half-transporters that are required for synthesis of an effective suberin barrier in roots and seed coats (ABCG2, ABCG6, and ABCG20) and for synthesis of an intact pollen wall (ABCG1 and ABCG16).;Belongs to a clade of five Arabidopsis thaliana ABCG half-transporters that are required for synthesis of an effective suberin barrier in roots and se…
TraesCS1D02G053000	C1	91.7379	0.870467	0.207972	0.0946112	0.0490591	NA	NA	NA
TraesCS1D02G053500	C1	69.8715	58.2907	36.0039	59.8878	69.982	NA	NA	NA
TraesCS1D02G057500	C1	23.9797	0.533149	0.995323	1.06698	3.43433	NA	NA	NA
TraesCS1D02G059500	C1	52.1329	8.12698	4.70273	11.2591	8.80512	NA	NA	NA
TraesCS1D02G062900	C1	35.2304	15.9928	32.7309	2.97016	1.50094	AT1G57550;AT2G38905	AT1G57550;AT2G38905	Low temperature and salt responsive protein family;(source:Araport11);Low temperature and salt responsive protein family;(source:Araport11)
TraesCS1D02G063000	C1	15.467	10.9119	8.78796	9.57789	10.0452	AT3G45600;AT5G60220	TET3;TET4	Member of TETRASPANIN family;Member of TETRASPANIN family
TraesCS1D02G065300	C1	2.52606	1.78875	1.56352	2.16315	1.71498	AT1G16980;AT1G78580;AT4G27550	TPS2;TPS1;TPS4	Encodes an enzyme putatively involved in trehalose biosynthesis. The protein has a trehalose synthase (TPS)-like domain that may or may not be active but no trehalose phosphatase (TPP)-like domain.;Encodes an enzyme putatively involved in trehalose biosynthesis. The protein has a trehalose synthase (TPS)-like domain but no trehalose phosphatase (TPP)-like domain. ATTPS1 is able to complement yeas…
TraesCS1D02G067100	C1	0.14353	0.0134385	0	0	0	AT1G03880;AT1G03890;AT4G28520;AT5G44120	CRB;CRD;CRC;CRA1	Protein is tyrosine-phosphorylated and its phosphorylation state is modulated in response to ABA in Arabidopsis thaliana seeds.;RmlC-like cupins superfamily protein;(source:Araport11);Encodes a 12S seed storage protein that is tyrosine-phosphorylated and its phosphorylation state is modulated in response to ABA in Arabidopsis thaliana seeds.;Encodes a 12S seed storage protein. The Landsberg erect…
TraesCS1D02G067200	C1	10.538	9.94617	6.73053	7.30804	6.82691	AT3G53380;AT5G03140	LECRK81;LECRK82	Concanavalin A-like lectin protein kinase family protein;(source:Araport11);Concanavalin A-like lectin protein kinase family protein;(source:Araport11)
TraesCS1D02G067700	C1	4.86954	4.57686	4.76739	4.09714	2.68482	NA	NA	NA
TraesCS1D02G069800	C1	27.4211	5.67278	2.74548	1.59025	1.41764	NA	NA	NA
TraesCS1D02G072200	C1	120.739	14.473	7.64651	10.9301	17.6648	AT2G40140;AT3G55980	CZF1;SZF1	zinc finger (CCCH-type) family protein;(source:Araport11);salt-inducible zinc finger 1;(source:Araport11)
TraesCS1D02G072700	C1	4.17077	0.190036	0	0	0	AT2G38240;AT3G11180;AT3G55970;AT5G05600	ANS;AT3G11180;JRG21;AT5G05600	One of 4 paralogs encoding a 2-oxoglutarate/Fe(II)-dependent oxygenases that hydroxylates JA to 12-OH-JA.;One of 4 paralogs encoding a 2-oxoglutarate/Fe(II)-dependent oxygenases that hydroxylates JA to 12-OH-JA.;One of 4 paralogs encoding a 2-oxoglutarate/Fe(II)-dependent oxygenases that hydroxylates JA to 12-OH-JA.;Encodes a protein with similarity to flavonol synthases that is involved in the d…
TraesCS1D02G072900	C1	83.9688	14.4581	11.569	24.9199	22.3853	NA	NA	NA
TraesCS1D02G073100	C1	42.4802	5.49563	4.18024	3.67923	5.4226	NA	NA	NA
TraesCS1D02G074000	C1	0.259256	0	0	0	0.106874	NA	NA	NA
TraesCS1D02G074100	C1	0.109602	0	0	0	0	NA	NA	NA
TraesCS1D02G075700	C1	1.05811	0.131166	0	0.371152	0.494655	NA	NA	NA
TraesCS1D02G077900	C1	2.32423	1.89359	1.00097	0.625251	0.699305	NA	NA	NA
TraesCS1D02G078300	C1	2.05578	1.6283	0.632667	1.80367	1.87474	NA	NA	NA
TraesCS1D02G080300	C1	0.900994	0	0.0525046	0.507224	0.473466	NA	NA	NA
TraesCS1D02G081200	C1	1023.36	359.188	100.177	268.936	335.141	AT3G03190;AT5G17220	GSTF11;GSTF12	Encodes glutathione transferase belonging to the phi class of GSTs. Naming convention according to Wagner et al. (2002).;Encodes glutathione transferase belonging to the phi class of GSTs. Naming convention according to Wagner et al. (2002). Mutants display no pigments on leaves and stems. Likely to function as a carrier to transport anthocyanin from the cytosol to tonoplasts.
TraesCS1D02G081400	C1	62.5325	25.7247	23.8492	28.093	20.5239	AT1G48210;AT1G48220;AT2G47060;AT3G17410;AT3G62220	AT1G48210;AT1G48220;AT2G47060;AT3G17410;AT3G62220	Protein kinase superfamily protein;(source:Araport11);Protein kinase superfamily protein;(source:Araport11);Encodes Pto-interacting 1-4 (PTI1-4), a member of the PTI1-like serine/threonine protein kinases that share strong sequence identity to the tomato PTI1 kinase.;Positively regulates ABA-mediated physiological responses via phosphorylation on RCAR3/ RCAR11.;Protein kinase superfamily protein;…
TraesCS1D02G084200	C1	3.09094	0.880276	0.27992	0.561336	1.70356	AT2G43010;AT3G59060	PIF4;PIF5	Isolated as a semidominant mutation defective in red -light responses. Encodes a nuclear localized bHLH protein that interacts with active PhyB protein. Negatively regulates phyB mediated red light responses. Involved in shade avoidance response. Protein abundance is negatively regulated by PhyB.Involved in the regulation of response to nutrient levels. Controls the resistance to B. cinerea in a …
TraesCS1D02G084500	C1	1.96825	0.124476	0.323057	0.389676	1.61511	AT2G46940;AT3G62070;AT4G01670	AT2G46940;AT3G62070;AT4G01670	fold protein;(source:Araport11);hypothetical protein;(source:Araport11);hypothetical protein;(source:Araport11)
TraesCS1D02G084900	C1	277.889	15.6605	54.5942	2.60331	2.25314	AT1G54870;AT3G05260	AT1G54870;AT3G05260	ChlADR is an aldehyde reductase that catalyzes the reduction of the aldehyde carbonyl groups on saturated and alpha,beta-unsaturated aldehydes with more than 5 carbons in vitro. The N-terminal region of this protein directs GFP to the chloroplast where where ChlADR likely helps to maintain the photosynthetic process by detoxifying reactive carbonyls formed during lipid peroxidation. In addition, …
TraesCS1D02G085900	C1	10.9392	6.08606	2.2229	3.29853	1.46846	AT1G08940;AT3G05170	AT1G08940;AT3G05170	Phosphoglycerate mutase family protein;(source:Araport11);Phosphoglycerate mutase family protein;(source:Araport11)
TraesCS1D02G086700	C1	401.803	215.393	332.907	368.709	281.602	AT1G17290;AT1G72330	ALAAT1;ALAAT2	Encodes for alanine aminotransferase (ALAAT1), involved in alanine catabolism during plants recovery from hypoxia The mRNA is cell-to-cell mobile.;Encodes for alanine aminotransferase ALAAT2.
TraesCS1D02G087800	C1	9.22003	4.30876	1.91991	3.03638	2.72948	NA	NA	NA
TraesCS1D02G088800	C1	8.9267	5.70224	2.85183	6.05436	3.83297	AT5G66150	AT5G66150	Glycosyl hydrolase family 38 protein;(source:Araport11)
TraesCS1D02G090400	C1	17.6937	9.00411	8.30374	7.6653	7.53085	AT3G24440	VIL1	Encodes Vernalization Insensitive 3-like 1 (VIL1). VIL1 is involved in the photoperiod and vernalization of Arabidopsis by regulating expression of the related floral repressors Flowering Locus C (FLC) and Flowering Locus M (FLM). VIL1, along with VIN3 (Vernalization Insensitive 3) is necessary for the chromatin modification to FLC and FLM.
TraesCS1D02G091600	C1	5.5192	0.0151297	0.0147119	0.0649083	0.0442179	AT2G05940;AT5G35580	RIPK;AT5G35580	Encodes a receptor-like cytoplasmic kinase that phosphorylates the host target RIN4, leading to the activation of a plant innate immune receptor RPM1.;Protein kinase superfamily protein;(source:Araport11)
TraesCS1D02G091700	C1	0.159615	0	0	0.0414214	0	AT3G09220;AT5G01040;AT5G01050	LAC7;LAC8;LAC9	putative laccase, a member of laccase family of genes (17 members in Arabidopsis).;putative laccase, knockout mutant showed early flowering;putative laccase, a member of laccase family of genes (17 members in Arabidopsis).
TraesCS1D02G096500	C1	5.42892	2.75146	5.08303	2.42052	5.84244	NA	NA	NA
TraesCS1D02G096600	C1	5.83736	4.86569	4.87548	4.68774	4.88094	NA	NA	NA
TraesCS1D02G097000	C1	20.5209	3.3496	5.739	0.717798	0.297953	NA	NA	NA
TraesCS1D02G098100	C1	2.6269	0.398687	0.0990193	0.35982	0.4052	NA	NA	NA
TraesCS1D02G100100	C1	2.71714	1.18712	1.01953	1.02961	0.613992	AT1G11720	ATSS3	Encodes a starch synthase that in addition to its role in starch biosynthesis also has a negative regulatory function in the biosynthesis of transient starch. The protein apparently contains a starch-binding domain (SBD).
TraesCS1D02G100300	C1	0.730069	0	0.0234234	0.0205347	0.0425299	NA	NA	NA
TraesCS1D02G100900	C1	1.18389	0	0.266712	0.500975	0.565429	NA	NA	NA
TraesCS1D02G101100	C1	3.4292	0	0.164059	0.107759	0.179835	NA	NA	NA
TraesCS1D02G101700	C1	40.9454	33.9382	37.1571	20.6145	7.9029	AT2G47770	TSPO	Encodes a membrane-bound protein designated AtTSPO (Arabidopsis thaliana TSPO-related). AtTSPO is related to the bacterial outer membrane tryptophan-rich sensory protein (TspO) and the mammalian mitochondrial 18 kDa Translocator Protein (18 kDa TSPO), members of the TspO/MBR domain-containing membrane proteins. Mainly detected in dry seeds, but can be induced in vegetative tissues by osmotic or s…
TraesCS1D02G102400	C1	522.725	51.2879	31.5506	51.5647	60.7871	NA	NA	NA
TraesCS1D02G103500	C1	60.2257	1.16326	0.682189	1.7824	3.94747	AT2G37040;AT3G10340;AT3G53260;AT5G04230	PAL1;PAL4;PAL2;PAL3	Encodes PAL1, a phenylalanine ammonia-lyase. Arabidopsis has four PALs: AT2G37040 (PAL1), AT3G53260 (PAL2), AT5G04230 (PAL3) and AT3G10340 (PAL4).;Encodes PAL4, a putative a phenylalanine ammonia-lyase. Arabidopsis has four PALs: AT2G37040 (PAL1), AT3G53260 (PAL2), AT5G04230 (PAL3) and AT3G10340 (PAL4).;Encodes phenylalanine lyase. Arabidopsis has four PALs: AT2G37040 (PAL1), AT3G53260 (PAL2), AT…
TraesCS1D02G104400	C1	18.4836	10.1311	12.2522	12.1428	10.8649	AT1G64040	TOPP3	Encodes the catalytic subunit of a Type 1 phosphoprotein Ser/Thr phosphatase, expressed in roots, shoots and flowers.
TraesCS1D02G106400	C1	3.83356	2.70532	2.77138	3.8228	3.3192	NA	NA	NA
TraesCS1D02G106700	C1	2.41715	0.826174	0.477666	1.10148	2.01495	NA	NA	NA
TraesCS1D02G107000	C1	5.46021	2.30521	1.76935	3.01883	2.94343	AT1G52870;AT4G03410	AT1G52870;AT4G03410	Peroxisomal membrane 22 kDa (Mpv17/PMP22) family protein;(source:Araport11);Peroxisomal membrane 22 kDa (Mpv17/PMP22) family protein;(source:Araport11)
TraesCS1D02G107400	C1	80.5288	38.0866	36.2959	32.6365	23.7695	AT3G16950;AT4G16155	LPD1;LPD2	encodes a plastid lipoamide dehydrogenase, subunit of the pyruvate dehydrogenase complex which provides acetyl-CoA for de novo fatty acid biosynthesis. The gene is highly expressed in developing seeds.;dihydrolipoamide dehydrogenase;(source:Araport11)
TraesCS1D02G107600	C1	0.688692	0	0.0100166	0	0	NA	NA	NA
TraesCS1D02G108300	C1	69.613	44.846	41.7653	29.3213	27.7673	AT3G17020	AT3G17020	Adenine nucleotide alpha hydrolases-like superfamily protein;(source:Araport11)
TraesCS1D02G111400	C1	74.3257	0.367341	0.365039	0.468637	0.865333	NA	NA	NA
TraesCS1D02G114500	C1	6.41365	1.75489	2.69789	2.54203	1.63933	NA	NA	NA
TraesCS1D02G116800	C1	24.9811	11.9565	11.106	8.54933	6.3082	NA	NA	NA
TraesCS1D02G117400	C1	17.5431	14.1603	13.5191	11.9941	7.70369	NA	NA	NA
TraesCS1D02G117900	C1	133.482	6.02296	12.6464	27.062	44.979	NA	NA	NA
TraesCS1D02G118000	C1	202.878	9.56003	13.7746	19.8034	26.1487	NA	NA	NA
TraesCS1D02G118100	C1	15.78	0.494327	2.96242	4.98207	9.33418	NA	NA	NA
TraesCS1D02G118300	C1	3.67741	1.80447	2.82976	2.58074	2.7397	AT2G22740;AT2G35160	SUVH6;SUVH5	Encodes a SU(VAR)3-9 homolog, a methyltransferase involved in histone methylation. The protein was shown to bind to methylated cytosines of CG, CNG and CNN motifs but has a preference for the latter two. This is a member of a subfamily of SET proteins that shares a conserved SRA domain.;Encodes SU(var)3-9 homologue 5 (SUVH5). SUVH5 has histone methyltransferase (MTase) activity in vitro and contr…
TraesCS1D02G118500	C1	254.232	34.2368	104.511	140.082	222.411	NA	NA	NA
TraesCS1D02G118800	C1	0.194372	0	0.038822	0	0.0379613	NA	NA	NA
TraesCS1D02G119000	C1	0.316108	0	0	0	0	NA	NA	NA
TraesCS1D02G119900	C1	1.08019	0.0540189	0	0	0.0526251	NA	NA	NA
TraesCS1D02G120200	C1	11.4689	0	0	0	0	AT3G24420	AT3G24420	DLK2 is a divergent member of the DWARF14 family. It's expression is dependent on D14 and KAI2 but it does not appear to play a role in stringolactone metabolism.
TraesCS1D02G121000	C1	149.113	34.8677	24.0867	33.9217	35.2071	AT1G79920;AT1G79930	AT1G79920;HSP70-14	Heat shock protein 70 (Hsp 70) family protein;(source:Araport11);encodes high molecular weight heat shock protein 70 not a HSP90 homolog, mRNA is constitutively expressed but transiently induced after heat shock
TraesCS1D02G121200	C1	82.0536	65.9603	78.4695	68.0029	61.3494	AT1G79920;AT1G79930	AT1G79920;HSP70-14	Heat shock protein 70 (Hsp 70) family protein;(source:Araport11);encodes high molecular weight heat shock protein 70 not a HSP90 homolog, mRNA is constitutively expressed but transiently induced after heat shock
TraesCS1D02G122600	C1	189.636	0.711197	2.57993	1.86355	5.53889	NA	NA	NA
TraesCS1D02G123400	C1	31.5345	7.86998	9.7021	10.881	10.9637	AT5G11670;AT5G25880	NADP-ME2;NADP-ME3	The malic enzyme (EC 1.1.1.40) encoded by AtNADP-ME2 is presumably a cytosolic enzyme involved in malate metabolism and possibly assisting the oxidative pentose phosphate pathway. AtNADP-ME2 counts for the major part of NADP-ME activity in mature tissues of Arabidopsis.;The malic enzyme (EC 1.1.1.40) encoded by the ATNADP-ME3 is presumably cytosolic and restricted in its expression by both develo…
TraesCS1D02G123700	C1	7.75479	2.57338	1.30153	1.91486	1.48957	AT2G19860;AT4G29130	HXK2;HXK1	Encodes a protein with hexokinase activity (AtHXK2) and acts as a sensor for plant sugar responses.;Encodes a hexokinase (HXK1) in the plant glucose-signaling network. Functions as a glucose sensor to interrelate nutrient, light, and hormone signaling networks for controlling growth and development in response to the changing environment.
TraesCS1D02G124400	C1	3.25925	2.39363	2.36018	2.63778	1.89696	AT4G34830	MRL1	Encodes MRL1, a conserved pentatricopeptide repeat protein, required for stabilization of rbcL mRNA.
TraesCS1D02G125100	C1	1.6997	1.07941	0.239365	0.0906874	0.113867	NA	NA	NA
TraesCS1D02G126300	C1	14.6105	8.47361	9.5025	11.6753	8.81514	AT1G52290;AT3G24540;AT3G24550	PERK15;AT3G24540;PERK1	Encodes a member of the proline-rich extensin-like receptor kinase (PERK) family. This family consists of 15 predicted receptor kinases (PMID: 15653807).;Encodes a member of the proline-rich extensin-like receptor kinase (PERK) family. This family consists of 15 predicted receptor kinases (PMID: 15653807).;Encodes a member of the proline-rich extensin-like receptor kinase (PERK) family. This fami…
TraesCS1D02G127700	C1	0.554075	0.14883	0.160364	0.612357	0.110746	AT4G18960	AG	Floral homeotic gene encoding a MADS domain transcription factor. Specifies floral meristem and carpel and stamen identity. Binds CArG box sequences. It is the only C function gene. It interacts genetically with the other homeotic genes to specify the floral organs.
TraesCS1D02G127800	C1	21.1479	17.6253	9.71579	18.2582	11.8172	AT1G17620;AT5G11890	AT1G17620;AT5G11890	Late embryogenesis abundant (LEA) hydroxyproline-rich glycoprotein family;(source:Araport11);harpin-induced protein;(source:Araport11)
TraesCS1D02G131800	C1	150.045	28.94	31.7064	29.1296	29.0767	AT4G24280;AT5G49910	HSP70-6;HSP70-7	Involved in protein import into chloroplasts during early developmental stages. The mRNA is cell-to-cell mobile.;Stromal heat shock protein involved in protein import into chloroplast. The mRNA is cell-to-cell mobile.
TraesCS1D02G133900	C1	8.19705	6.92263	5.95411	7.41302	4.83125	NA	NA	NA
TraesCS1D02G136900	C1	21.7661	16.7267	16.8318	16.4314	13.1247	AT4G39990;AT5G65270	RABA4B;RABA4A	Rab GTPase that selectively marks cell wall-containing TGN compartments. Involved in protein trafficking to membranes during tip growth.;RAB GTPase homolog A4A;(source:Araport11)
TraesCS1D02G138500	C1	0.669322	0.627651	0.16227	0.0710563	0.0335217	NA	NA	NA
TraesCS1D02G139400	C1	392.802	52.9525	15.5357	33.1863	39.828	AT2G36950;AT5G03380	HIPP05;HIPP06	Heavy metal transport/detoxification superfamily protein;(source:Araport11);Heavy metal transport/detoxification superfamily protein;(source:Araport11)
TraesCS1D02G141000	C1	68.55	2.60306	7.32583	13.6797	12.612	AT3G47160;AT5G01520;AT5G58787	AT3G47160;AIRP2;AT5G58787	RING/U-box superfamily protein;(source:Araport11);Encodes a cytosolic RING-type E3 ubiquitin (Ub) ligase that is critical for ABA and high salinity responses during germination. AtAIRP2 and SDIR1 likely play a combinatory role in ABA signaling and the response to high salt in Arabidopsis.;Encodes a cytosolic protein with E3 ligase activity that is involved in positive regulation of ABA responses.
TraesCS1D02G142100	C1	8.06243	2.5855	4.48644	6.38662	4.84457	AT5G22920	RZPF34	Encodes a protein with sequence similarity to RING, zinc finger proteins. Loss of function mutations show reduced (15%) stomatal aperture under non stress conditions.
TraesCS1D02G142700	C1	41.1604	8.1379	6.79932	7.56438	2.93127	AT5G48880	KAT5	Encodes a peroxisomal 3-keto-acyl-CoA thiolase 2 precursor. EC2.3.1.16 thiolases. AT5G48880.1 is named PKT1 and AT5G48880.2 is named PKT2.
TraesCS1D02G144200	C1	0.628	0	0	0	0	AT4G28780	AT4G28780	GDSL-motif esterase/acyltransferase/lipase. Enzyme group with broad substrate specificity that may catalyze acyltransfer or hydrolase reactions with lipid and non-lipid substrates.
TraesCS1D02G145400	C1	0.826323	0.0525479	0.0192333	0.084596	0.115201	AT4G28706;AT5G43910	AT4G28706;AT5G43910	pfkB-like carbohydrate kinase family protein;(source:Araport11);pfkB-like carbohydrate kinase family protein;(source:Araport11)
TraesCS1D02G148000	C1	37.8192	28.8356	28.8786	27.5263	18.2898	AT3G23490	CYN	Encodes a cyanase that catalyzes the bicarbonate-dependent breakdown of cyanate to ammonia and bicarbonate. CYN forms a hexadecamer and is believed to be a cytosolic protein. Long-term exposure to NaCl increases CYN transcript levels. It is also expressed at higher levels in flowers relative to stems, roots, and seedlings.
TraesCS1D02G148900	C1	2.40562	0.369888	0.229229	1.19505	0.860905	AT1G07720;AT2G28630;AT5G04530	KCS3;KCS12;KCS19	Encodes KCS3, a member of the 3-ketoacyl-CoA synthase family involved in the biosynthesis of VLCFA (very long chain fatty acids).;Encodes KCS12, a member of the 3-ketoacyl-CoA synthase family involved in the biosynthesis of VLCFA (very long chain fatty acids).;Encodes KCS19, a member of the 3-ketoacyl-CoA synthase family involved in the biosynthesis of VLCFA (very long chain fatty acids).
TraesCS1D02G150400	C1	11.9995	8.57462	7.84194	9.78408	8.44559	AT1G15130	BRO1	ALIX mediates endosomal protein trafficking and turnover through the ESCRT/MVB pathway. One target is the phosphate transporter PHT1;1. Modulates ABA-mediated inhibition of plant growth and stomatal aperture (PMID:31363038).
TraesCS1D02G151500	C1	4.16388	1.25852	0.409233	0.525606	0.68921	AT1G03990;AT3G23410;AT4G28570	FAO1;FAO3;FAO4B	Long-chain fatty alcohol dehydrogenase family protein;(source:Araport11);Encodes a fatty alcohol oxidase.;Long-chain fatty alcohol dehydrogenase family protein;(source:Araport11)
TraesCS1D02G152000	C1	7.49023	4.75741	4.62118	6.95787	6.60154	AT1G03950	VPS2.3	vacuolar protein sorting-associated protein 2.3;(source:Araport11)
TraesCS1D02G153900	C1	420.967	399.083	399.045	403.301	315.518	AT1G04410;AT5G43330	MDH1;MDH2	predicted to encode a cytosolic malate dehydrogenase.;predicted to encode a cytosolic malate dehydrogenase. The mRNA is cell-to-cell mobile.
TraesCS1D02G156800	C1	7.53269	2.61735	2.79911	3.63274	3.84832	NA	NA	NA
TraesCS1D02G158700	C1	80.5309	29.4833	7.65858	24.2572	21.6522	AT5G08290	YLS8	Encodes Dim1 homolog.
TraesCS1D02G160200	C1	9.54766	9.69167	2.05215	0.75586	0.509131	NA	NA	NA
TraesCS1D02G161000	C1	13.5177	12.1538	9.85728	12.2479	9.59591	AT1G15130	BRO1	ALIX mediates endosomal protein trafficking and turnover through the ESCRT/MVB pathway. One target is the phosphate transporter PHT1;1. Modulates ABA-mediated inhibition of plant growth and stomatal aperture (PMID:31363038).
TraesCS1D02G162300	C1	35.2425	7.31801	6.44551	5.73961	4.28068	NA	NA	NA
TraesCS1D02G163800	C1	130.369	67.3629	103.789	38.4491	12.6888	NA	NA	NA
TraesCS1D02G164700	C1	0.609658	0.264597	0.194518	0.17506	0.126834	NA	NA	NA
TraesCS1D02G165000	C1	0.125023	0	0.0350228	0.108568	0.0647994	AT3G03480;AT5G17540	CHAT;AT5G17540	acetyl CoA:(Z)-3-hexen-1-ol acetyltransferase;(source:Araport11);HXXXD-type acyl-transferase family protein;(source:Araport11)
TraesCS1D02G166000	C1	0.879891	0	0.156307	0.169836	0.0722375	NA	NA	NA
TraesCS1D02G166500	C1	2.82842	0.971271	1.52301	1.03821	0.451123	AT1G24470	KCR2	Encodes one of the two Arabidopsis homologues to YBR159w encoding a S. cerevisiae beta-ketoacyl reductase (KCR), which catalyzes the first reduction during VLCFA (very long chain fatty acids, >18 carbon) elongation: KCR1 (At1g67730), KCR2 (At1g24470). Complementation of the yeast ybr159Delta mutant demonstrated that the two KCR proteins are divergent and that only AtKCR1 can restore heterologous …
TraesCS1D02G167300	C1	16.9512	10.5537	11.7044	9.63731	12.6357	NA	NA	NA
TraesCS1D02G168400	C1	0.176787	0	0	0.107498	0.0421919	AT2G26740;AT2G26750	ATSEH;AT2G26750	Encodes a soluble epoxide hydrolase whose expression is induced by auxin and water stress.;alpha/beta-Hydrolases superfamily protein;(source:Araport11)
TraesCS1D02G168500	C1	10.1895	4.28364	5.55033	3.8163	4.20367	AT1G52920;AT2G20770	GCR2;GCL2	Encodes a plasma membrane閳ユ悋ocalized ABA receptor, which interacts with the G&#945;&#946;&#947; complex. It has been postulated that the binding of ABA to GCR2 results in the release of the G protein and dissociation of the heterotrimeric complex into G&#945; and the G&#946;&#947; dimer to activate downstream ABA effectors and to trigger the ABA responses.;Encodes a protein with reported similari…
TraesCS1D02G168700	C1	58.5658	11.4184	0.627923	0.114671	0.691697	AT4G27440;AT5G54190	PORB;PORA	light-dependent NADPH:protochlorophyllide oxidoreductase B The mRNA is cell-to-cell mobile.;light-dependent NADPH:protochlorophyllide oxidoreductase A
TraesCS1D02G168800	C1	10.295	6.32669	8.76761	8.93488	7.77692	AT1G11060;AT1G61030	AT1G11060;AT1G61030	Encodes one of two redundant proteins (the other is WAPL2) that are involved in prophase removal of cohesion during meiosis. Double mutants with wapl2 exhibit reduced fertility due to defects in meiosis and also some abnormal embryo development in rare cases where embryos are formed.;Encodes one of two redundant proteins (the other is WAPL1) that are involved in prophase removal of cohesion durin…
TraesCS1D02G168900	C1	5.91958	2.53907	2.4614	2.65377	2.957	AT4G30580	LPAT1	Encodes a plastidic lysophosphatidic acid acyltransferase (LPAAT). Is critical for chloroplasts phosphatidic acid biosynthesis. The null allele is embryo lethal.
TraesCS1D02G172300	C1	0.410268	0.0795846	0	0	0	NA	NA	NA
TraesCS1D02G173800	C1	89.7449	6.17451	8.77069	5.30022	8.65931	AT1G54540;AT1G65690;AT5G36970	AT1G54540;NHL6;NHL25	Late embryogenesis abundant (LEA) hydroxyproline-rich glycoprotein family;(source:Araport11);Encodes NHL6 (NDR1/HIN1-like 6). Plays an important role in the abiotic stresses-induced ABA signaling and biosynthesis, particularly during seed germination and early seedling development.;NDR1/HIN1-like protein, expression induced during incompatible response to a pathogen, expression is at least partly…
TraesCS1D02G175000	C1	1.59443	0.256919	0.745654	0.793812	0.465333	NA	NA	NA
TraesCS1D02G175200	C1	518.273	79.3612	60.6836	18.0222	9.90154	AT1G17810;AT1G73190	TIP3-2;TIP3-1	beta-tonoplast intrinsic protein (beta-TIP) mRNA, complete;Moves to the Protein Storage Vacuole in a Golgi independent manner
TraesCS1D02G175700	C1	27.4533	28.4146	7.215	10.7631	12.8495	AT1G64900;AT1G64930;AT1G64940;AT1G64950;AT2G12190;AT3G03470;AT5G61320	CYP89A2;CYP89A7;CYP89A6;CYP89A5;AT2G12190;CYP89A9;CYP89A3	Encodes cytochrome P450 (CYP89A2). The mRNA is cell-to-cell mobile.;member of CYP89A;member of CYP89A;member of CYP89A The mRNA is cell-to-cell mobile.;Cytochrome P450 superfamily protein;(source:Araport11);P450 monooxygenase CYP89A9. Involved in NDCC accumulation during Arabidopsis leaf senescence.;member of CYP89A
TraesCS1D02G175900	C1	12.9998	7.38663	7.29473	11.122	10.6117	AT1G01550;AT2G46080;AT3G61500;AT4G01360	BPS1;AT2G46080;AT3G61500;AT4G01360	Encodes a protein with no functionally characterized domains that to prevent the synthesis of a novel substance that moves from the root to the shoot, where it modifies shoot growth by interfering with auxin signaling. Synthesis and delivery of this substance requires neither phloem nor endodermis.;Encodes a protein related to BYPASS1 (BPS1). Regulates production of mobile compound: bps signal.;B…
TraesCS1D02G176000	C1	1.22825	1.11181	0.381214	0.303749	0.11998	AT4G10380	NIP5-1	Boric acid channel. Essential for efficient boron uptake and plant development under boron limitation. Also functions in arsenite transport and tolerance. Localized preferentially in outer membrane domains of root cells.
TraesCS1D02G176600	C1	3.22143	2.86914	1.90631	1.51045	1.53587	NA	NA	NA
TraesCS1D02G177400	C1	58.2294	45.3724	45.3897	39.8216	29.2693	NA	NA	NA
TraesCS1D02G177800	C1	2.71679	1.14495	1.43823	1.70847	1.08957	AT2G46910	PAP10	Plastid-lipid associated protein PAP / fibrillin family protein;(source:Araport11)
TraesCS1D02G184400	C1	1.0258	0.236025	0.329113	0.383156	0.252417	AT5G53580	PLR1	NAD(P)-linked oxidoreductase superfamily protein;(source:Araport11)
TraesCS1D02G185000	C1	17.5128	12.4385	14.3691	15.5732	10.4733	AT4G24100	AT4G24100	Protein kinase superfamily protein
TraesCS1D02G185500	C1	10.9726	5.97172	3.17878	2.53669	2.26819	AT2G46620	AT2G46620	P-loop containing nucleoside triphosphate hydrolases superfamily protein;(source:Araport11)
TraesCS1D02G185900	C1	7.79673	1.48389	1.01822	2.33115	2.19516	NA	NA	NA
TraesCS1D02G187100	C1	51.5243	3.87184	0.590968	1.12725	1.80878	NA	NA	NA
TraesCS1D02G187200	C1	3.76963	0.705987	0.127852	0	0	NA	NA	NA
TraesCS1D02G187500	C1	45.0983	3.20423	2.38252	2.03625	0.959524	AT5G07250	RBL3	RHOMBOID-like protein 3;(source:Araport11)
TraesCS1D02G187700	C1	82.8696	37.3936	21.5476	12.7633	14.1144	AT3G61060	AtPP2-A13	phloem protein 2-A13;(source:Araport11)
TraesCS1D02G187900	C1	21.2582	12.5087	18.7864	16.838	19.9087	AT1G01830;AT2G45720	AT1G01830;AT2G45720	ARM repeat superfamily protein;(source:Araport11);ARM repeat superfamily protein;(source:Araport11)
TraesCS1D02G188500	C1	4.37633	2.35713	1.71573	3.66965	2.92671	NA	NA	NA
TraesCS1D02G189000	C1	2.47945	2.44994	1.57819	1.31457	1.08763	NA	NA	NA
TraesCS1D02G189400	C1	42.3079	12.5072	9.19585	10.3339	14.852	NA	NA	NA
TraesCS1D02G189500	C1	0.878591	0.0417982	0.108075	0	0.0210349	NA	NA	NA
TraesCS1D02G191000	C1	2.32684	0.798114	1.10752	1.50432	0.633225	AT2G21230;AT4G38900	AT2G21230;AT4G38900	bZIP30 is a transcriptional activator that is involved in regulation of growth and development of reproductive organs. It interacts with a number of developmental regulators including WUS, HEC1, KNAT1/BP, KNAT2, JAB, BEL1, and NGA1.;Basic-leucine zipper (bZIP) transcription factor family protein;(source:Araport11)
TraesCS1D02G194700	C1	5.54044	2.9971	3.07445	4.84129	3.56832	NA	NA	NA
TraesCS1D02G196400	C1	43.3356	27.4149	15.3061	15.0967	14.8738	AT1G32700;AT4G17900;AT5G46710	AT1G32700;AT4G17900;AT5G46710	PLATZ transcription factor family protein;(source:Araport11);PLATZ transcription factor family protein;(source:Araport11);PLATZ transcription factor family protein;(source:Araport11)
TraesCS1D02G196900	C1	126.632	12.345	11.3701	18.5573	25.0742	AT1G32640;AT4G17880;AT5G46760;AT5G46830	MYC2;MYC4;MYC3;BHLH28	Encodes a MYC-related transcriptional activator with a typical DNA binding domain of a basic helix-loop-helix leucine zipper motif. Binds to an extended G-Box promoter motif and interacts with Jasmonate ZIM-domain proteins. MYC2 interacts with EIN3 and EIL1 to repress hook curvature and resistance to Botrytis cinera.Its transcription is induced by dehydration stress, ABA treatment and blue light …
TraesCS1D02G197500	C1	4.3757	2.99495	3.61266	3.3734	3.33549	AT1G79190	AT1G79190	ARM repeat superfamily protein;(source:Araport11)
TraesCS1D02G197700	C1	2.02747	1.50949	2.26987	0.943416	1.02694	NA	NA	NA
TraesCS1D02G198500	C1	13.807	10.1988	4.59219	10.9817	9.59211	NA	NA	NA
TraesCS1D02G199000	C1	19.2058	1.67286	2.44848	2.05653	1.63187	NA	NA	NA
TraesCS1D02G200300	C1	24.0429	12.822	12.8435	12.1362	6.81213	AT1G32090	AT1G32090	early-responsive to dehydration stress protein (ERD4);(source:Araport11)
TraesCS1D02G201300	C1	19.9651	12.5612	12.4734	17.2728	16.0424	NA	NA	NA
TraesCS1D02G202200	C1	15.8955	8.84006	5.11428	8.19106	5.81681	AT4G25030;AT5G45410	AT4G25030;AT5G45410	Plastid localized protein of unknown function. Mutants are more susceptible to P. syringae and produce less callose upon infection.;Plastid localized protein of unknown function. Mutants are more susceptible to P. syringae and produce less callose upon infection.
TraesCS1D02G203900	C1	2.10562	0.429242	0.213289	0.315497	0.758451	AT1G01030;AT2G46870;AT3G61970;AT4G01500	NGA3;NGA1;NGA2;NGA4	AP2/B3-like transcriptional factor family protein;(source:Araport11);Member of the RAV family of DNA binding proteins. Contains B3 domain. Recognizes 5'-CACCTG-'3 motif.;AP2/B3-like transcriptional factor family protein;(source:Araport11);AP2/B3-like transcriptional factor family protein;(source:Araport11)
TraesCS1D02G204200	C1	16.3609	15.7967	10.4766	14.2128	10.7097	AT1G14530;AT2G02180	THH1;TOM3	tobamovirus multiplication-like protein (DUF1084);(source:Araport11);Necessary for the efficient multiplication of tobamoviruses. The mRNA is cell-to-cell mobile.
TraesCS1D02G204700	C1	171.043	39.8678	88.7341	78.0441	88.8471	NA	NA	NA
TraesCS1D02G204800	C1	0.176085	0	0	0.00983067	0.0442111	NA	NA	NA
TraesCS1D02G206300	C1	117.212	37.4979	117.31	14.8689	3.39958	NA	NA	NA
TraesCS1D02G206700	C1	5.00076	0.10469	0.795252	0.995498	1.18137	AT3G45960;AT3G45970;AT4G38400	EXLA3;EXLA1;EXLA2	member of EXPANSIN-LIKE. Naming convention from the Expansin Working Group (Kende et al, 2004. Plant Mol Bio);member of EXPANSIN-LIKE. Naming convention from the Expansin Working Group (Kende et al, 2004. Plant Mol Bio) The mRNA is cell-to-cell mobile.;member of EXPANSIN-LIKE. Naming convention from the Expansin Working Group (Kende et al, 2004. Plant Mol Bio)
TraesCS1D02G207000	C1	2.81573	0.18197	0.164215	0.149679	0.338372	AT3G12500	CHI-B	encodes a basic chitinase involved in ethylene/jasmonic acid mediated signalling pathway during systemic acquired resistance based on expression analyses.
TraesCS1D02G208400	C1	31.6504	7.78813	3.86868	9.70519	4.28484	AT2G17730;AT4G35840;AT5G66070	NIP2;AT4G35840;AT5G66070	Intrinsic thylakoid membrane protein that fixes RPOTmp on the stromal side of the thylakoid membrane.;RING/U-box superfamily protein;(source:Araport11);E3 ubiquitin ligase that functions in negative regulation of ABA signaling.
TraesCS1D02G208900	C1	52.6914	46.7446	27.0794	29.9594	35.9589	AT4G12110;AT4G22755;AT4G22756	SMO1-1;SMO1-3;SMO1-2	Encodes a member of the SMO1 family of sterol 4alpha-methyl oxidases. More specifically functions as a 4,4-dimethyl-9beta,19-cyclopropylsterol-4alpha-methyl oxidase. Works together with SMO1-2 to maintain correct sterol composition and balance auxin and cytokinin activities during embryogenesis.;Encodes a member of the SMO1 family of sterol 4alpha-methyl oxidases. In general, the expression of SM…
TraesCS1D02G212400	C1	12.1927	2.22113	0.216309	3.9446	0.966274	AT3G30775;AT5G38710	POX1;POX2	Encodes a proline oxidase that is predicted to localize to the inner mitochondrial membrane, its mRNA expression induced by high levels of Al and by osmotic stress. The promoter contains an L-proline-inducible element.;Methylenetetrahydrofolate reductase family protein;(source:Araport11)
TraesCS1D02G213300	C1	4.18931	4.2197	0.986728	0	0.241413	AT1G12100	AT1G12100	Bifunctional inhibitor/lipid-transfer protein/seed storage 2S albumin superfamily protein;(source:Araport11)
TraesCS1D02G214700	C1	9.83914	3.03477	2.13304	4.37838	3.30395	AT2G35710;AT4G16600	PGSIP8;PGSIP7	Nucleotide-diphospho-sugar transferases superfamily protein;(source:Araport11);Nucleotide-diphospho-sugar transferases superfamily protein;(source:Araport11)
TraesCS1D02G214800	C1	0.67868	0.193568	0.298055	0.201479	0.281274	NA	NA	NA
TraesCS1D02G215800	C1	6.83533	3.57587	3.42925	5.8911	6.56687	NA	NA	NA
TraesCS1D02G216400	C1	1.11955	0.245394	0.0240398	0.0444002	0.0454192	AT2G38740	SGPP	HAD-type phosphosugar phosphatase.
TraesCS1D02G216500	C1	0.189064	0	0	0	0.0222722	NA	NA	NA
TraesCS1D02G216700	C1	1.46795	0.732542	0.449981	1.00717	0.820846	AT3G60190	DRP1E	At3g60190 encodes Arabidopsis dynamin-related protein 1E, DRP1E, also known as EDR3, ADL4 and ADL1E, which is 624 amino acid residues long, has a predicted mass of 69.8 kDa and a pI of 7.5. Dynamin-related protein 1E belongs to a plant-specific subclass of dynamin-related proteins (DRP1), consisting of five members in Arabidopsis (A, B, C, D, E). This class is characterized by having an N-termina…
TraesCS1D02G217600	C1	44.1794	26.829	25.4733	25.8264	19.5252	AT2G44650;AT3G60210	CPN10-2;CPN10-1	Encodes a chloroplast-localized chaperonin 10 whose mRNA is expressed in leaves and stems but not roots.;GroES-like family protein;(source:Araport11)
TraesCS1D02G217800	C1	2.62352	2.14798	0.817653	0.729206	1.25719	NA	NA	NA
TraesCS1D02G218000	C1	18.0256	1.20541	3.67167	5.1053	3.15015	AT4G17090	BAM3	Encodes a beta-amylase targeted to the chloroplast. Transgenic BMY8 RNAi lines fail to accumulate maltose during cold shock suggesting that maltose accumulation coincides with BMY8 expression. Apart from maltose, the sugar content of the RNAi lines were similar to wildtype (glucose and sucrose unaffected).BAM3 activity declines 2 and 4 days after start of cold stress despite an increase in transc…
TraesCS1D02G218100	C1	13.6662	10.6083	9.41049	10.678	9.34372	AT1G02170;AT4G25110	AMC1;AMC2	Encodes a type I metacaspase. Two Arabidopsis metacaspases, AT1G02170 (MC1) and AT4G25110 (MC2) antagonistically control programmed cell death in Arabidopsis. MC1 is a positive regulator of cell death and requires conserved caspase-like putative catalytic residues for its function. MC2 negatively regulates cell death. This function is independent of the putative catalytic residues. A third type I…
TraesCS1D02G218200	C1	17.4092	6.65964	14.1497	1.66807	0.664897	NA	NA	NA
TraesCS1D02G218900	C1	6.09896	0.723473	0.90582	1.56633	1.90367	NA	NA	NA
TraesCS1D02G219400	C1	8.42748	5.35915	3.24993	2.86659	3.78677	AT1G70160	AT1G70160	zinc finger MYND domain protein;(source:Araport11)
TraesCS1D02G219700	C1	12.2461	6.39073	4.54641	8.31148	8.89316	NA	NA	NA
TraesCS1D02G220300	C1	6.03077	0	0	0	0.0156575	AT4G16820	PLA-I{beta]2	Encodes a lipase that hydrolyzes phosphatidylcholine, glycolipids as well as triacylglycerols.
TraesCS1D02G221500	C1	8.95171	1.09837	1.68195	4.34475	4.59701	AT2G44940;AT3G60490	ERF034;ERF035	encodes a member of the DREB subfamily A-4 of ERF/AP2 transcription factor family. The protein contains one AP2 domain. There are 17 members in this subfamily including TINY.;encodes a member of the DREB subfamily A-4 of ERF/AP2 transcription factor family. The protein contains one AP2 domain. There are 17 members in this subfamily including TINY.
TraesCS1D02G222600	C1	1.20265	0.518569	0	0.103056	0.218922	AT1G17745	PGDH	encodes a 3-Phosphoglycerate dehydrogenase The mRNA is cell-to-cell mobile.
TraesCS1D02G223200	C1	0.757571	0.126379	0	0.2358	0.0918208	NA	NA	NA
TraesCS1D02G223400	C1	0.599236	0.0352182	0.142135	0.450778	0.539549	NA	NA	NA
TraesCS1D02G223600	C1	64.4755	31.3976	25.9726	27.8546	23.5801	AT3G11020;AT5G05410	DREB2B;DREB2A	encodes a member of the DREB subfamily A-2 of ERF/AP2 transcription factor family (DREB2B). The protein contains one AP2 domain. There are eight members in this subfamily including DREB2A.;Encodes a transcription factor that specifically binds to DRE/CRT cis elements (responsive to drought and low-temperature stress). Belongs to the DREB subfamily A-2 of ERF/AP2 transcription factor family (DREB2…
TraesCS1D02G224300	C1	0.668254	0.121042	0.143156	0.0594901	0.0264087	AT2G40270;AT3G56050;AT5G07150;AT5G58540	AT2G40270;AT3G56050;AT5G07150;AT5G58540	Protein kinase family protein;(source:Araport11);Protein kinase family protein;(source:Araport11);Leucine-rich repeat protein kinase family protein;(source:Araport11);Protein kinase superfamily protein;(source:Araport11)
TraesCS1D02G224800	C1	6.84632	6.3523	4.9149	6.02235	6.87042	AT5G58575	AT5G58575	Component of the deubiquitination module of the SAGA complex.
TraesCS1D02G224900	C1	27.9287	19.7468	19.1228	15.0259	11.77	AT4G32770	VTE1	Tocopherol cyclase involved in tocopherol (vitamin E)synthesis. VTE1 over-expressing plants have increased tocopherol indicating VTE1 is a major limiting factor in tocopherol synthesis. Mutants defective in this gene accumulate high amounts of zeaxanthin in conditions of high light or low temperature. Plays a role in the adaptation to low temperature stress, notably phloem loading.
TraesCS1D02G225200	C1	12.8538	0.638643	0.0771685	0.0565764	0.112171	NA	NA	NA
TraesCS1D02G225900	C1	20.7274	0.606488	1.12778	0	0.0428728	NA	NA	NA
TraesCS1D02G226600	C1	30.9946	20.9301	14.8393	17.5788	18.0898	AT2G40150;AT2G40160;AT3G55990	TBL28;TBL30;ESK1	Encodes a member of the TBL (TRICHOME BIREFRINGENCE-LIKE) gene family containing a plant-specific DUF231 (domain of unknown function) domain. TBL gene family has 46 members, two of which (TBR/AT5G06700 and TBL3/AT5G01360) have been shown to be involved in the synthesis and deposition of secondary wall cellulose, presumably by influencing the esterification state of pectic polymers. A nomenclature…
TraesCS1D02G228900	C1	14.1408	10.9844	11.5847	12.7828	10.6251	AT3G51550	FER	Encodes a synergid-expressed, plasma-membrane localized receptor-like kinase that accumulates asymetrically in the synergid membrnane at the filiform apparatus and mediates male-female gametophyte interactions during pollen tube reception. Also involved in powdery mildew infection. Mutants show faster root elongation under dim light, the protein is required for intracellular accumulation of AHA2 …
TraesCS1D02G229700	C1	0.701644	0.196964	0.0233485	0.29064	0.0426383	AT3G05640;AT3G16800;AT5G27930	AT3G05640;AT3G16800;PPC6-7	EGR1 functions as a negative regulator of plant growth with prominent effect on plant growth during drought stress.EGR1 regulates microtubule organization and likely affects additional cytoskeleton and trafficking processes along the plasma membrane.;EGR3 functions as a negative regulator of plant growth with prominent effect on plant growth during drought stress, EGR3 regulates microtubule organ…
TraesCS1D02G230000	C1	8.53468	2.35864	0.951146	2.62417	0.749822	AT3G05640;AT3G16800;AT5G27930	AT3G05640;AT3G16800;PPC6-7	EGR1 functions as a negative regulator of plant growth with prominent effect on plant growth during drought stress.EGR1 regulates microtubule organization and likely affects additional cytoskeleton and trafficking processes along the plasma membrane.;EGR3 functions as a negative regulator of plant growth with prominent effect on plant growth during drought stress, EGR3 regulates microtubule organ…
TraesCS1D02G230600	C1	4.31346	1.02815	0.244296	1.20659	0.60273	NA	NA	NA
TraesCS1D02G231500	C1	6.58531	0.499102	0.351417	0.577569	0.340371	AT2G47630;AT3G62860	AT2G47630;AT3G62860	alpha/beta-Hydrolases superfamily protein;(source:Araport11);alpha/beta-Hydrolases superfamily protein;(source:Araport11)
TraesCS1D02G231600	C1	147.205	141.492	79.0746	81.5348	59.2431	AT2G47650;AT3G62830	UXS4;UXS2	Encodes a Golgi localized isoform of UDP-glucuronic acid decarboxylase. UDP-glucuronic acid decarboxylase produces UDP-xylose, which is a substrate for many cell wall carbohydrates including hemicellulose and pectin. UDP-xylose is also known to feedback regulate several cell wall biosynthetic enzymes.;Encodes a Golgi localized isoform of UDP-glucuronic acid decarboxylase. This enzyme produces UDP…
TraesCS1D02G232700	C1	0.333535	0.125466	0.0765933	0.0165705	0	NA	NA	NA
TraesCS1D02G233300	C1	292.606	110.092	175.719	147.092	149.864	AT1G07790;AT2G28720;AT2G37470;AT3G09480;AT3G45980;AT3G46030;AT3G53650;AT5G02570;AT5G22880;AT5G59910	HTB1;AT2G28720;AT2G37470;AT3G09480;H2B;HTB11;AT3G53650;AT5G02570;H2B;HTB4	Encodes a histone 2B (H2B) protein.;Histone superfamily protein;(source:Araport11);Histone superfamily protein;(source:Araport11);Histone superfamily protein;(source:Araport11);Encodes a histone 2B (H2B) protein. This protein can be ubiquitinated in planta, and this modification depends on the HUB1 and HUB2 E3 ubiquitin ligases as well as the UBC1 and UBC2 E2 ubiquitin conjugating enzymes. Lysine…
TraesCS1D02G233400	C1	3.06821	0.985867	1.94312	2.12422	1.4559	AT1G02880;AT2G44750	TPK1;TPK2	Encodes a thiamine pyrophosphokinase capable of producing thiamine pyrophosphate from free thiamine.;Encodes a thiamine pyrophosphokinase capable of producing thiamine pyrophosphate from free thiamine.
TraesCS1D02G233900	C1	3.87582	0.039437	0.0957153	0.145901	0.0433844	NA	NA	NA
TraesCS1D02G234200	C1	0.134903	0.0170559	0.0288828	0.0384408	0.122416	NA	NA	NA
TraesCS1D02G234600	C1	0.867439	0.123026	0	0.139385	0.188622	NA	NA	NA
TraesCS1D02G236200	C1	25.5133	3.17917	7.45001	9.53187	8.00396	AT1G08860	BON3	Encodes a copine-like protein, which is a member of a newly identified class of calcium-dependent, phospholipid binding proteins that are present in a wide range of organisms. Overexpression of this gene suppresses bon1-1 phenotypes. Double mutant analyses with bon1-1 suggest that BON1 and BON3 have overlapping functions in maintaining cellular homeostasis and inhibiting cell death.
TraesCS1D02G237600	C1	0.84624	0.761202	0.925818	0.494126	0.448702	AT3G57190	PRFB3	Encodes a chloroplast stroma-localized ribosomal peptide chain release factor that is involved in the light- and stress-dependent regulation of stability of 3' processed petB transcripts to adjust cytochrome b(6) levels. It appears to bind to the 3'-UTR of petB RNA, protecting it from 3'-5' exonucleolytic attack. At-prfB3 arose from a gene duplication of At-prfB1.
TraesCS1D02G238800	C1	0.435776	0.080411	0.220082	0.325698	0.169498	NA	NA	NA
TraesCS1D02G239000	C1	94.6863	10.9862	10.2563	3.39876	3.91271	NA	NA	NA
TraesCS1D02G239300	C1	33.1062	5.92338	5.8546	7.82029	10.011	NA	NA	NA
TraesCS1D02G240400	C1	7.27575	6.24616	5.58271	6.00309	6.58907	AT2G01210	ZAR1	ZAR1 encodes a plasma membrane localized leucine-rich repeat receptor-like kinase (LRR-RLK) that contains a putative CaM-binding domain and a G&#946;-binding motif within its intracellular kinase region. Homozygous of function mutations are embryo-lethal and fail to properly make the first asymmetric division of the zygote. ZAR1 interacts with both CaM and G&#946; in vivo and that interaction act…
TraesCS1D02G242400	C1	8.19295	6.33156	5.50075	5.69814	3.39428	AT3G21070	NADK1	Encodes a protein with NAD(H) kinase activity.
TraesCS1D02G242500	C1	18.7752	7.73232	12.1485	14.9586	15.5478	AT3G63490	RPL1	Ribosomal protein L1p/L10e family;(source:Araport11)
TraesCS1D02G243500	C1	0.423147	0.054574	0	0.203884	0.293036	AT1G06800;AT2G30550	PLA-I{gamma}1;AT2G30550	Encodes a lipase that hydrolyzes phosphatidylcholine, glycolipids as well as triacylglycerols.;Encodes a lipase that hydrolyzes phosphatidylcholine, glycolipids as well as triacylglycerols.
TraesCS1D02G244700	C1	13.135	8.21178	2.29462	3.55262	3.27721	NA	NA	NA
TraesCS1D02G246700	C1	17.8962	10.7188	15.8465	12.5312	16.6784	AT1G52320;AT5G25590	AT1G52320;AT5G25590	kinesin-like protein;(source:Araport11);DNA ligase (DUF630 and DUF632);(source:Araport11)
TraesCS1D02G249700	C1	5.59571	0.145184	0.233373	0.376171	0.470018	AT3G23570;AT3G23600	AT3G23570;AT3G23600	alpha/beta-Hydrolases superfamily protein;(source:Araport11);alpha/beta-Hydrolases superfamily protein;(source:Araport11)
TraesCS1D02G250300	C1	3.11616	1.25328	0.805106	0.936302	1.94083	NA	NA	NA
TraesCS1D02G252900	C1	26.2639	0.647648	2.89859	1.88935	0.696565	AT4G15530	PPDK	Encodes a dual-targeted protein believed to act as a pyruvate, orthophosphate dikinase. These enzymes are normally associated with C4 photosynthesis which does not occur in Arabidopsis. However, PPDK may play a role in remobilizing nitrogen during leaf senescence in Arabidopsis. The product of the long transcript (.1 gene model) was shown to be targeted to the chloroplast, whereas the shorter tra…
TraesCS1D02G253900	C1	0.31559	0	0.00981121	0.104727	0.048965	AT5G18860;AT5G18870;AT5G18890	AT5G18860;AT5G18870;AT5G18890	Encodes a purine nucleoside hydrolase active in the apoplast. It might play a role in salvaging extracellular ATP. NSH3 transcript levels rise in response to jasmonic acid and wounding.;Similar to N terminal region of NSH1 nucleoside hydrolase.;Inosine-uridine preferring nucleoside hydrolase family protein;(source:Araport11)
TraesCS1D02G254800	C1	13.4701	3.98036	3.95401	11.4742	7.2045	NA	NA	NA
TraesCS1D02G256000	C1	18.6605	7.69395	16.833	13.244	12.8252	AT2G38720	MAP65-5	microtubule-associated protein 65-5;(source:Araport11)
TraesCS1D02G259000	C1	85.1979	12.1111	13.7834	17.3891	14.772	AT3G10820;AT5G05140	MED26A;MED26B	Transcription elongation factor (TFIIS) family protein;(source:Araport11);Transcription elongation factor (TFIIS) family protein;(source:Araport11)
TraesCS1D02G259100	C1	11.3089	3.41785	4.25809	7.00827	5.2533	NA	NA	NA
TraesCS1D02G259300	C1	23.3016	1.5631	2.33787	2.96785	2.66693	NA	NA	NA
TraesCS1D02G260200	C1	4.9712	2.55754	2.58253	2.34852	3.00664	AT2G31840	MRL7L	Thioredoxin superfamily protein;(source:Araport11)
TraesCS1D02G260500	C1	9.48394	1.04506	7.63008	6.60288	5.6595	AT3G23890	TOP2	Encodes a topoisomerase II that is highly expressed in young seedlings. The protein is localized in the nucleus and gene expression levels are increased in proliferative tissues.
TraesCS1D02G261200	C1	1.78771	0.399102	0.297659	0.767819	0.264209	AT1G64480	CBL8	calcineurin B-like protein 8, member of plant-specific family of calcium sensor proteins containing 3 EF-hand motifs
TraesCS1D02G261400	C1	11.8612	2.25989	1.98701	0.799938	0.413965	AT2G44110;AT4G02600	MLO15;MLO1	A member of a large family of seven-transmembrane domain proteins specific to plants, homologs of the barley mildew resistance locus o (MLO) protein. The Arabidopsis genome contains 15 genes encoding MLO proteins, with localization in plasma membrane. Phylogenetic analysis revealed four clades of closely-related AtMLO genes. ATMLO15 belongs to the clade II, with ATMLO13 and ATMLO15. The gene is e…
TraesCS1D02G262100	C1	3.30567	2.3553	0.889507	1.24843	1.05397	AT5G38520	AT5G38520	CLD1 is involved in steady-state chlorophyll turnover; CLD1 dephytylates chlorophyll a, chlorophyll b, and pheophytin a in vitro; CLD1 and CHLG form a salvage cycle in recycling chlorophyll. Suppression of CLD1 expression results in reduced tolerance to moderately high temperature.
TraesCS1D02G262900	C1	49.0959	6.48854	6.1958	10.4375	13.5491	AT1G71691	AT1G71691	GDSL-motif esterase/acyltransferase/lipase. Enzyme group with broad substrate specificity that may catalyze acyltransfer or hydrolase reactions with lipid and non-lipid substrates.
TraesCS1D02G263200	C1	3.08336	0	0	0	0.154638	AT1G22810;AT1G71520	ERF019;ERF020	encodes a member of the DREB subfamily A-5 of ERF/AP2 transcription factor family. The protein contains one AP2 domain. There are 16 members in this subfamily including RAP2.1, RAP2.9 and RAP2.10. Overexpression leands to delayed senescence and delayed flowering. Negatively regulates plant resistance to P. parasitica by suppressing PAMP-triggered immunity.;encodes a member of the DREB subfamily A…
TraesCS1D02G263300	C1	24.5805	11.7498	23.7733	16.1331	14.455	NA	NA	NA
TraesCS1D02G264400	C1	6.88145	0.780528	1.49338	0.883348	0.78382	NA	NA	NA
TraesCS1D02G264500	C1	1.44959	0.891915	0.807325	0.880533	0.891851	AT5G20240	PI	Floral homeotic gene encoding a MADS domain transcription factor. Required for the specification of petal and stamen identities.
TraesCS1D02G264700	C1	14.3974	2.59642	13.1839	3.50278	1.57404	AT5G09220;AT5G63850	AAP2;AAP4	member of AAAP family The mRNA is cell-to-cell mobile.;Amino acid transporter whose expression is downregulated by dehydration.
TraesCS1D02G266900	C1	4.9643	0.344405	0.204596	1.54776	2.73762	NA	NA	NA
TraesCS1D02G267700	C1	16.9685	3.71891	2.70872	4.00048	4.27586	AT1G44760	AT1G44760	Adenine nucleotide alpha hydrolases-like superfamily protein;(source:Araport11)
TraesCS1D02G268100	C1	71.1361	31.135	8.10323	9.44366	21.5485	NA	NA	NA
TraesCS1D02G270300	C1	38.6885	16.1587	1.1836	0.55115	1.48922	NA	NA	NA
TraesCS1D02G270900	C1	81.7515	49.4899	54.0998	67.4808	62.9104	NA	NA	NA
TraesCS1D02G271000	C1	0.422184	0.115966	0	0	0.0594379	AT1G10940;AT1G60940	ASK1;SRK2B	Encodes a plant protein kinase similar to the calcium/calmodulin-dependent protein kinase subfamily and the SNF1 kinase subfamily (SnRK2) whose activity is activated by ionic (salt) and non-ionic (mannitol) osmotic stress. Kinase activity of its homolog in tobacco is induced by hyperosmotic condition within 1 minute. Phosphatidylinositol 4-phosphate 5-kinase (PIP5K) enzyme family member.;encodes …
TraesCS1D02G272200	C1	1.38831	0.158954	0.0531023	0.453606	0.604677	NA	NA	NA
TraesCS1D02G272800	C1	15.5996	5.30369	2.94047	4.52512	3.90813	AT4G02630	AT4G02630	Protein kinase superfamily protein;(source:Araport11)
TraesCS1D02G272900	C1	0.285398	0.0324643	0.0724627	0.176074	0	NA	NA	NA
TraesCS1D02G273200	C1	47.9231	10.9715	13.2284	16.0467	18.0425	AT1G25280;AT1G43640;AT1G76900	TULP10;TULP5;TULP1	Member of TLP family;Member of TLP family of tubby like proteins that also contain an F-Box.;Member of plant TLP family. Contains terminal F-box domain, interacts with ASK proteins. Tethered to the PM.
TraesCS1D02G273300	C1	0.509604	0	0	0	0	NA	NA	NA
TraesCS1D02G273500	C1	62.8703	12.6761	12.4374	18.885	9.73911	AT1G01050;AT2G46860;AT4G01480	PPA1;PPA3;PPA5	Encodes a soluble protein with inorganic pyrophosphatase activity that is highly specific for Mg-inorganic pyrophosphate.;Encodes a protein that might have inorganic pyrophosphatase activity.;Encodes a protein that might have inorganic pyrophosphatase activity.
TraesCS1D02G274800	C1	41.7353	16.6205	12.0543	11.5269	10.5465	AT5G06370	AT5G06370	PSE1 is a single copy gene that is induced in response to lead and confers increased tolerance to lead when overexpressed. It is localized to the cytoplasm. The protein has an NC domain. PSE1 appears to regulate tolerance via a GSH dependent phytochelatin synthesis pathway.
TraesCS1D02G275900	C1	9.05862	4.03002	5.6957	5.08566	4.22971	NA	NA	NA
TraesCS1D02G276600	C1	27.8357	0.265124	0.0763388	1.28811	1.51509	AT2G27690	CYP94C1	Encodes a CYP94C1. Has highest omega-hydroxylase activity with 9,10-epoxystearic acid, while also metabolized lauric acid (C12:0) and C18 unsaturated fatty acids. Gene expression is induced in response to wounding and jasmonic acid treatment.
TraesCS1D02G277100	C1	11.8074	7.04262	5.90315	4.12725	3.68066	NA	NA	NA
TraesCS1D02G277300	C1	17.7864	9.86119	4.92141	5.48323	5.74821	AT5G01260	AT5G01260	Carbohydrate-binding-like fold;(source:Araport11)
TraesCS1D02G277400	C1	12.8694	11.4557	6.45648	9.97198	8.36593	AT5G05710	AT5G05710	Pleckstrin homology (PH) domain superfamily protein;(source:Araport11)
TraesCS1D02G277600	C1	0.853567	0.0591641	0.0833346	0.0622144	0.19619	AT5G01240	LAX1	Encodes LAX1 (LIKE AUXIN RESISTANT), a member of the AUX1 LAX family of auxin influx carriers. Required for the establishment of embryonic root cell organization.
TraesCS1D02G277700	C1	29.9799	27.6986	12.4761	16.0253	16.92	NA	NA	NA
TraesCS1D02G277900	C1	51.2812	12.2527	19.7634	14.9707	15.5771	NA	NA	NA
TraesCS1D02G278300	C1	7.50219	5.30825	1.8715	1.27788	0.758805	AT3G47000;AT3G47010;AT3G47040;AT3G47050	AT3G47000;AT3G47010;AT3G47040;AT3G47050	Glycosyl hydrolase family protein;(source:Araport11);Glycosyl hydrolase family protein;(source:Araport11);Glycosyl hydrolase family protein;(source:Araport11);Glycosyl hydrolase family protein;(source:Araport11)
TraesCS1D02G279700	C1	4.2016	2.02605	0.588923	1.11718	0.869052	AT5G05930	ATGC1	guanylyl cyclase 1;(source:Araport11)
TraesCS1D02G280300	C1	0.578655	0.361948	0.0289212	0.192743	0.507794	AT5G02030	BLH9	Mutant has additional lateral organs and phyllotaxy defect. Encodes a homeodomain transcription factor. Has sequence similarity to the Arabidopsis ovule development regulator Bell1. Binds directly to the AGAMOUS cis-regulatory element. Its localization to the nucleus is dependent on the coexpression of either STM or BP.
TraesCS1D02G281800	C1	2.88197	0.154215	0.0635151	0.966705	0.331993	AT2G37760;AT2G37770;AT2G37790;AT3G53880	AKR4C8;AKR4C9;AKR4C10;AKR4C11	Encodes an NADPH-dependent aldo-keto reductase that can act on a wide variety of substrates in vitro including aliphatic and aromatic aldehydes and steroids. Transcript levels for this gene are up-regulated in response to cold, salt, and drought stress.;Encodes an NADPH-dependent aldo-keto reductase that can act on a wide variety of substrates in vitro including saturated and unsaturated aldehyde…
TraesCS1D02G282100	C1	5.9911	0	0	0	0	AT4G21105	AT4G21105	cytochrome-c oxidase/ electron carrier;(source:Araport11)
TraesCS1D02G282200	C1	8.47654	6.52971	7.98257	6.14006	6.55036	NA	NA	NA
TraesCS1D02G282500	C1	14.7263	11.3828	10.2154	12.6283	11.4643	AT3G55520	FKBP20-1	FKBP-like peptidyl-prolyl cis-trans isomerase family protein;(source:Araport11)
TraesCS1D02G283300	C1	11.6192	2.17037	7.69476	7.00809	6.65363	AT5G02370	AT5G02370	ATP binding microtubule motor family protein;(source:Araport11)
TraesCS1D02G284000	C1	1401.18	367.587	86.97	217.62	207.51	AT3G12580	MED37C	heat shock protein 70;(source:Araport11)
TraesCS1D02G284600	C1	3.24575	2.08007	0.888151	0.708997	0.532587	AT5G59770	AT5G59770	Protein-tyrosine phosphatase-like, PTPLA;(source:Araport11)
TraesCS1D02G285800	C1	64.1666	28.7782	28.8647	39.8806	46.8485	AT5G02560	HTA12	Encodes HTA12, a histone H2A protein.
TraesCS1D02G285900	C1	3.92442	0.0320069	0	0	0	NA	NA	NA
TraesCS1D02G286300	C1	16.674	9.63513	8.82241	9.06171	7.57085	AT3G09560	PAH1	The PAH1 gene encodes a phosphatidate phosphohydrolase. Mutant analysis revealed its involvement in galactolipid synthesis pathway, and the membrane lipid remodeling. The pah1pah2 double-mutant showed enhanced Al-susceptibility under low-P conditions, but there was no significant differences in Al tolerance between pah1pah2 and wild type when they were grown in a solution containing 35 &#956;M Pi.
TraesCS1D02G286700	C1	525.979	229.117	417.056	314.24	310.49	AT5G59690	AT5G59690	Histone superfamily protein;(source:Araport11)
TraesCS1D02G288700	C1	1.89241	0.169145	0.0849636	0.390088	1.35128	NA	NA	NA
TraesCS1D02G289800	C1	15.2187	2.02189	4.74921	4.6584	3.59812	NA	NA	NA
TraesCS1D02G290200	C1	185.335	94.954	167.307	133.017	116.989	AT5G59970	AT5G59970	Histone superfamily protein;(source:Araport11)
TraesCS1D02G290300	C1	0.735013	0.184952	0.216555	0.214937	0.0649387	NA	NA	NA
TraesCS1D02G292600	C1	18.899	7.2469	9.77343	9.19557	9.55735	AT3G10980;AT5G05350	AT3G10980;AT5G05350	PLAC8 family protein;(source:Araport11);PLAC8 family protein;(source:Araport11)
TraesCS1D02G293000	C1	47.9237	5.60297	21.3846	2.24631	2.21146	AT5G01670	AT5G01670	NAD(P)-linked oxidoreductase superfamily protein;(source:Araport11)
TraesCS1D02G293200	C1	5.54766	3.71304	3.18468	3.56414	2.52175	AT5G07120;AT5G58440	SNX2B;SNX2A	Encodes sorting nexin SNX2b. SNX2b is peripherally associated with membranes. Involved in vesicular trafficking from endosomes to the vacuole.;sorting nexin 2A;(source:Araport11)
TraesCS1D02G293400	C1	17.5955	6.30219	5.17557	5.94444	5.34807	AT1G07000;AT5G58430	ATEXO70B2;EXO70B1	A member of EXO70 gene family, putative exocyst subunits, conserved in land plants. Arabidopsis thaliana contains 23 putative EXO70 genes, which can be classified into eight clusters on the phylogenetic tree.;A member of EXO70 gene family, putative exocyst subunits, conserved in land plants. Arabidopsis thaliana contains 23 putative EXO70 genes, which can be classified into eight clusters on the …
TraesCS1D02G293600	C1	1.16993	0.0484935	0.0545568	0.319095	0.636235	AT2G38310;AT2G40330;AT5G05440	PYL4;PYL6;PYL5	Encodes a member of the PYR (pyrabactin resistance )/PYL(PYR1-like)/RCAR (regulatory components of ABA receptor) family proteins with 14 members. PYR/PYL/RCAR family proteins function as abscisic acid sensors. Mediate ABA-dependent regulation of protein phosphatase 2Cs ABI1 and ABI2. The mRNA is cell-to-cell mobile.;Encodes a member of the PYR (pyrabactin resistance )/PYL(PYR1-like)/RCAR (regulat…
TraesCS1D02G295800	C1	3.89427	1.51631	1.62559	1.7684	1.56916	NA	NA	NA
TraesCS1D02G296000	C1	0.491988	0.0425507	0.1457	0.272573	0	NA	NA	NA
TraesCS1D02G296500	C1	85.2699	45.5767	97.9364	30.4419	12.0973	AT5G01300	AT5G01300	PEBP (phosphatidylethanolamine-binding protein) family protein;(source:Araport11)
TraesCS1D02G296700	C1	4.36466	1.96485	0.410046	0.501595	0.79028	NA	NA	NA
TraesCS1D02G298300	C1	10.918	6.65002	5.0208	5.6498	7.68593	NA	NA	NA
TraesCS1D02G299400	C1	17.8639	0.756563	0.4515	1.13244	0.762244	AT5G01830	PUB16	Plant U-box type E3 ubiquitin ligase (PUB).
TraesCS1D02G299500	C1	1.18652	0.367234	0	0.0591085	0.0195319	NA	NA	NA
TraesCS1D02G300700	C1	0.521357	0	0.0236778	0.218922	0.21146	NA	NA	NA
TraesCS1D02G301400	C1	0.852543	0.68843	0.393964	0.364233	0.309241	NA	NA	NA
TraesCS1D02G301700	C1	4.08888	0.0599609	0.987254	3.78151	2.95155	NA	NA	NA
TraesCS1D02G305200	C1	0.415055	0.143901	0.252708	0.395651	0.18292	AT3G04030;AT5G18240	MYR2;MYR1	Homeodomain-like superfamily protein;(source:Araport11);Encodes MYR1 (MYR1).
TraesCS1D02G306000	C1	7.85493	4.97345	5.47674	6.41214	7.03731	AT2G41070;AT3G56850	EEL;DPBF3	Transcription factor homologous to ABI5. Regulates AtEm1 expression by binding directly at the AtEm1 promoter. Located in the nucleus and expressed during seed maturation in the cotyledons and later in the whole embryo.;Encodes an ABA-responsive element binding protein with a bZIP domain. Located in the nucleus and expressed in the embryo during seed maturation.
TraesCS1D02G307100	C1	44.8617	26.7347	35.4606	41.2687	31.3503	NA	NA	NA
TraesCS1D02G307200	C1	20.1955	3.18298	2.24382	2.36569	3.00039	AT1G22220;AT1G78100	AT1G22220;AT1G78100	F-box family protein;(source:Araport11);F-box family protein;(source:Araport11)
TraesCS1D02G307700	C1	11.121	3.06122	3.13531	2.92085	3.9416	AT1G73100;AT5G04940	SUVH3;SUVH1	Encodes a SU(VAR)3-9 homolog, a SET domain protein. Known SET domain proteins are involved in epigenetic control of gene expression and act as histone methyltransferases. There are 10 SUVH genes in Arabidopsis and members of this subfamily of the SET proteins have an additional conserved SRA domain.;Encodes a SU(VAR)3-9 homolog, a SET domain protein. Known SET domain proteins are involved in epig…
TraesCS1D02G308100	C1	522.975	392.931	329.335	350.284	423.599	NA	NA	NA
TraesCS1D02G308600	C1	10.4706	6.41421	6.35196	7.99636	6.4077	NA	NA	NA
TraesCS1D02G309700	C1	1.38814	0.566537	0.0723592	0.123072	0	AT2G30140;AT2G30150	UGT87A2;AT2G30150	Encodes a putative glycosyltransferase. Regulates flowering time via FLOWERING LOCUS C.;UDP-Glycosyltransferase superfamily protein;(source:Araport11)
TraesCS1D02G309900	C1	20.9763	2.45982	0.720332	3.14509	1.76415	NA	NA	NA
TraesCS1D02G310000	C1	22.4209	8.67744	4.83166	7.06659	5.5946	AT2G40890	CYP98A3	encodes coumarate 3-hydroxylase (C3H), a P450-dependent monooxygenase. Involved in lignin biosynthesis and flavonoid biosynthesis. Also affects the biosynthesis of coumarins such as scopoletin and scopolin as a branching-out-pathway from the phenylpropanoid acid level.
TraesCS1D02G310300	C1	68.751	10.669	9.47501	14.7722	11.4883	AT2G40880	CYS3	Encodes a protein with cysteine proteinase inhibitor activity. Overexpression increases tolerance to abiotic stressors (i.e.salt,osmotic, cold stress). The mRNA is cell-to-cell mobile.
TraesCS1D02G312000	C1	6.15166	0.0480374	0.052368	0.255192	0	NA	NA	NA
TraesCS1D02G312200	C1	1.15683	0.912849	0.226142	0.465537	0.50715	NA	NA	NA
TraesCS1D02G313100	C1	3.16639	0	0	0	0	NA	NA	NA
TraesCS1D02G314700	C1	6.95833	1.55282	1.74362	2.51329	2.13132	NA	NA	NA
TraesCS1D02G314800	C1	79.5265	27.0876	18.4977	23.6076	27.9921	AT1G53170;AT3G15210;AT5G44210	ERF8;ERF4;ERF9	encodes a member of the ERF (ethylene response factor) subfamily B-1 of ERF/AP2 transcription factor family (ATERF-8). The protein contains one AP2 domain. There are 15 members in this subfamily including ATERF-3, ATERF-4, ATERF-7, and leafy petiole.;Encodes a member of the ERF (ethylene response factor) subfamily B-1 of ERF/AP2 transcription factor family (ATERF-4). The protein contains one AP2 …
TraesCS1D02G316900	C1	126.623	93.1057	75.2794	78.725	61.7494	NA	NA	NA
TraesCS1D02G317301	C1	0.147926	0	0	0	0	NA	NA	NA
TraesCS1D02G319600	C1	0.837204	0.449781	0.153227	0.45119	0.108954	NA	NA	NA
TraesCS1D02G319700	C1	2.47527	0.234747	0.174382	0.0864486	0.0268496	AT1G49390;AT5G20400	AT1G49390;AT5G20400	2-oxoglutarate (2OG) and Fe(II)-dependent oxygenase superfamily protein;(source:Araport11);encodes a protein whose sequence is similar to flavanone 3 hydroxylase from Malus. The mRNA is cell-to-cell mobile.
TraesCS1D02G321100	C1	63.6637	53.0507	50.7186	50.0673	49.7169	AT1G11360;AT4G27320;AT5G54430	AT1G11360;PHOS34;ATPHOS32	Adenine nucleotide alpha hydrolases-like superfamily protein;(source:Araport11);Contains a universal stress protein domain. Protein is phosphorylated in response to Phytophthora infestans zoospores and xylanase.;Contains a universal stress protein domain. Protein is phosphorylated in response to Phytophthora infestans zoospores and xylanase.
TraesCS1D02G322000	C1	0.374575	0.0499729	0.0452315	0.046949	0.293707	AT5G54250	CNGC4	member of Cyclic nucleotide gated channel family, downstream component of the signaling pathways leading to HR resistance. mutant plants exhibit gene-for-gene disease resistance against avirulent Pseudomonas syringae despite the near-complete absence of the hypersensitive response (HR). Salicylic acid accumulation in dnd2 mutants is completely PAD4-independent.
TraesCS1D02G322400	C1	21.2907	7.3713	7.4726	9.26858	9.24315	AT4G14570	AT4G14570	Encodes an acylamino acid-releasing enzyme (AARE) catalyzing the N-terminal hydrolysis of N[alpha]-acylpeptides to release N[alpha]-acylated amino acids The mRNA is cell-to-cell mobile.
TraesCS1D02G330500	C1	42.9755	25.9864	36.2451	1.88323	0.557389	AT5G22470	AT5G22470	PARP3 is one of three canonical PARPs in Arabidopsis.
TraesCS1D02G332500	C1	67.5957	50.1009	39.9736	51.1538	45.8378	AT5G08290	YLS8	Encodes Dim1 homolog.
TraesCS1D02G332700	C1	16.3869	7.1484	12.249	12.8893	12.6526	AT1G79090;AT3G22270;AT4G14990	PAT1;PAT1H1;PAT1H2	Encodes a component of the mRNA decapping machinery that is found in complexes with and is phosphorylated by MPK4. The protein can be found in P-bodies after treatment with PAMPs. Pat1 mutants exhibit dwarfism and de-repressed immunity dependent on the immune receptor SUMM2. The pat1 constitutive defense phenotype is suppressed by summ2 such that pat1 summ2 mutants display a wild-type phenotype i…
TraesCS1D02G334200	C1	8.14063	5.66626	4.87609	8.71541	6.58436	AT1G31300	AT1G31300	TRAM, LAG1 and CLN8 (TLC) lipid-sensing domain containing protein;(source:Araport11)
TraesCS1D02G334400	C1	15.647	1.92909	11.8707	11.7206	12.0077	AT4G07960	CSLC12	encodes a XyG glucan synthase; gene similar to cellulose synthase
TraesCS1D02G334600	C1	18.5961	8.20729	12.0871	14.9064	14.8873	NA	NA	NA
TraesCS1D02G334700	C1	7.13455	0.784195	0.112299	0.365239	0.377795	NA	NA	NA
TraesCS1D02G334800	C1	19.6909	1.25326	1.36989	1.00451	1.16827	AT3G01060	AT3G01060	lysine-tRNA ligase;(source:Araport11)
TraesCS1D02G334900	C1	12.9404	7.69835	3.14379	3.90958	3.02611	NA	NA	NA
TraesCS1D02G335400	C1	0.36584	0.0156475	0	0.00631709	0.0169338	AT3G22910;AT3G63380	ACA13;ACA12	ATPase E1-E2 type family protein / haloacid dehalogenase-like hydrolase family protein;(source:Araport11);ATPase E1-E2 type family protein / haloacid dehalogenase-like hydrolase family protein;(source:Araport11)
TraesCS1D02G335500	C1	7.08449	0.016049	0.0700434	0.138566	0.16447	AT3G22910;AT3G63380	ACA13;ACA12	ATPase E1-E2 type family protein / haloacid dehalogenase-like hydrolase family protein;(source:Araport11);ATPase E1-E2 type family protein / haloacid dehalogenase-like hydrolase family protein;(source:Araport11)
TraesCS1D02G335900	C1	1.88099	1.3475	1.19688	1.25771	1.32781	NA	NA	NA
TraesCS1D02G336900	C1	0.476352	0.0289985	0	0	0	NA	NA	NA
TraesCS1D02G337200	C1	0.535405	0.0269608	0.0262163	0	0	NA	NA	NA
TraesCS1D02G339800	C1	33.1718	0	0	0.64085	0.237933	NA	NA	NA
TraesCS1D02G340400	C1	24.0721	1.92649	3.88745	11.9093	13.1238	AT1G06410	TPS7	Encodes an enzyme putatively involved in trehalose biosynthesis. Though the protein has both trehalose-6-phosphate synthase (TPS)-like and trehalose-6-phosphate phosphatase (TPP)-like domains, neither activity has been detected in enzymatic assays nor has the protein been able to complement yeast TPS or TPP mutants.
TraesCS1D02G342100	C1	730.982	39.0301	10.6903	35.8614	50.0432	AT1G74310;AT4G14670;AT4G14675	CLPB1;CLPB2;AT4G14675	Encodes ClpB1, which belongs to the Casein lytic proteinase/heat shock protein 100 (Clp/Hsp100) family. Involved in refolding of proteins which form aggregates under heat stress. Also known as AtHsp101. AtHsp101 is a cytosolic heat shock protein required for acclimation to high temperature.;This locus was originally annotated as encoding ClpB2 (also referred to as Hsp92.7), which belongs to the C…
TraesCS1D02G343000	C1	13.4391	9.01614	4.77186	5.71816	6.60786	NA	NA	NA
TraesCS1D02G343400	C1	5.71416	1.57721	1.73351	3.32651	3.73922	AT5G23940	DCR	Encodes PERMEABLE LEAVES3 (PEL3), a putative acyl-transferase. Mutation in this locus results in altered trichome phenotype (trcichomes become tangled during leaf expansion). Additional phenotype includes altered cuticle layer.
TraesCS1D02G344000	C1	19.6569	14.7662	13.4544	14.3927	15.1084	AT2G25740	AT2G25740	ATP-dependent protease La (LON) domain protein;(source:Araport11)
TraesCS1D02G344100	C1	6.14052	2.31139	0.357364	1.89558	1.88294	AT5G19730	PME53	Pectin lyase-like superfamily protein;(source:Araport11)
TraesCS1D02G346200	C1	124.306	49.7988	69.1993	71.7199	57.5434	AT4G26270;AT4G29220;AT4G32840;AT5G56630	PFK3;PFK1;PFK6;PFK7	phosphofructokinase 3;(source:Araport11);phosphofructokinase 1;(source:Araport11);phosphofructokinase 6;(source:Araport11);phosphofructokinase 7;(source:Araport11)
TraesCS1D02G348500	C1	1.82492	1.11115	1.49031	0.811595	1.3914	AT5G60335	AT5G60335	Encodes the mitochondria-localized 3-hydroxyacyl-acyl carrier protein (ACP) dehydratase (mtHD) component of the mitochondrial fatty acid synthase (mtFAS) system. It catalyzes the third of the four iterative reactions that constitute the mtFAS cycle. Additionally, it supports the assembly of lipid A-like molecules and has an unexpected function in maintaining the morphology of chloroplastic starch…
TraesCS1D02G349200	C1	110.136	85.5938	85.7271	11.9893	9.08883	AT5G07500	TZF6	Encodes an embryo-specific zinc finger transcription factor required for heart-stage embryo formation.
TraesCS1D02G349400	C1	0.566238	0	0	0	0	NA	NA	NA
TraesCS1D02G349700	C1	47.5504	36.5266	28.8689	32.1846	31.3304	AT1G64090;AT2G46170;AT3G61560;AT4G01230;AT4G11220;AT4G23630;AT5G41600	RTNLB3;RTNLB5;RTNLB6;RTNLB7;RTNLB2;RTNLB1;RTNLB4	Reticulan like protein B3;(source:Araport11);Reticulon family protein;(source:Araport11);Reticulon family protein;(source:Araport11);Reticulon family protein. Mutants are resistant to agrobacterium infection.;VIRB2-interacting protein 2;(source:Araport11);VIRB2-interacting protein 1;(source:Araport11);VIRB2-interacting protein 3;(source:Araport11)
TraesCS1D02G349800	C1	0.998784	0	0.142604	0.173323	0.233782	AT1G07240;AT1G07250;AT1G07260;AT2G29710;AT2G29730;AT2G29740;AT2G29750;AT3G21750;AT3G21760;AT3G21780;AT3G21790;AT3G21800;AT4G15260;AT4G15270;AT4G15280	UGT71C5;UGT71C4;UGT71C3;UGT71D2;UGT71D1;UGT71C2;UGT71C1;UGT71B1;UGT71B2;UGT71B6;UGT71B7;UGT71B8;AT4G15260;AT4G15270;UGT71B5	Encodes a UDP-glucosyltransferase that plays a role in abscisic acid (ABA) glucosylation from ABA to ABA-glucose ester and regulates ABA homeostasis, thereby influencing the ABA signal network.;UDP-glucosyl transferase 71C4;(source:Araport11);Encodes a uridine diphosphate-glycosyltransferase that acts on methyl salicylate (MeSA) to form MeSA glucosides in vitro and in vivo and facilitates negativ…
TraesCS1D02G350200	C1	10.4611	6.02777	2.89111	6.29284	5.3921	NA	NA	NA
TraesCS1D02G352200	C1	5.18097	4.35862	3.45112	2.16412	0.794961	AT1G16960;AT1G53400;AT5G45740	AT1G16960;AT1G53400;AT5G45740	Ubiquitin domain-containing protein;(source:Araport11);Ubiquitin domain-containing protein;(source:Araport11);Ubiquitin domain-containing protein;(source:Araport11)
TraesCS1D02G352300	C1	8.56266	3.66595	6.32079	7.40294	6.24586	AT4G18820;AT5G45720	AT4G18820;AT5G45720	AAA-type ATPase family protein;(source:Araport11);AAA-type ATPase family protein;(source:Araport11)
TraesCS1D02G352900	C1	2.26333	0.746434	1.2167	2.17162	1.70378	NA	NA	NA
TraesCS1D02G353800	C1	3.30148	0.0689096	0	1.04576	0.365301	NA	NA	NA
TraesCS1D02G354900	C1	12.7698	7.10391	5.99412	6.55409	3.89947	AT1G28240;AT1G53040	AT1G28240;AT1G53040	strawberry notch protein (DUF616);(source:Araport11);tRNA (met) cytidine acetyltransferase, putative (DUF616);(source:Araport11)
TraesCS1D02G358500	C1	16.8413	9.28081	4.41502	5.25372	3.14536	AT3G18170;AT3G18180	AT3G18170;AT3G18180	Glycosyltransferase family 61 protein;(source:Araport11);Glycosyltransferase family 61 protein;(source:Araport11)
TraesCS1D02G359100	C1	17.3605	5.17285	0.811912	2.79396	1.99724	AT3G01900;AT3G48520;AT5G63450	CYP94B2;CYP94B3;CYP94B1	member of CYP94B;CYP94B3 is a jasmonoyl-isoleucine-12-hydroxylase that catalyzes the formation of 12-OH-JA-Ile from JA-Ile. By reducing the levels of this the biologically active phytohormone, CYP94B3 attenuates the jasmonic acid signaling cascade. CYP94B3 transcript levels rise in response to wounding.;AtWRKY33 regulates root apoplastic barrier formation by controlling AtCYP94B1 leading to incre…
TraesCS1D02G360000	C1	57.027	41.233	21.4089	34.8686	27.762	NA	NA	NA
TraesCS1D02G362900	C1	1.24682	0.190488	0.0448978	0.301071	0.402074	AT5G26170	WRKY50	member of WRKY Transcription Factor; Group II-c. Involved in jasmonic acid inducible defense responses.
TraesCS1D02G363300	C1	2.00552	1.97482	1.6575	1.41342	1.27257	AT5G26170	WRKY50	member of WRKY Transcription Factor; Group II-c. Involved in jasmonic acid inducible defense responses.
TraesCS1D02G363800	C1	46.876	1.20073	0.612689	0.353907	0.619228	NA	NA	NA
TraesCS1D02G363900	C1	15.9667	7.65064	8.46013	9.54205	5.59981	AT1G29840;AT2G19550;AT3G47560;AT3G47590;AT5G11910	AT1G29840;AT2G19550;AT3G47560;AT3G47590;AT5G11910	alpha/beta-Hydrolases superfamily protein;(source:Araport11);alpha/beta-Hydrolases superfamily protein;(source:Araport11);alpha/beta-Hydrolases superfamily protein;(source:Araport11);alpha/beta-Hydrolases superfamily protein;(source:Araport11);alpha/beta-Hydrolases superfamily protein;(source:Araport11)
TraesCS1D02G364400	C1	218.782	83.7703	159.41	116.238	99.2082	AT5G59970	AT5G59970	Histone superfamily protein;(source:Araport11)
TraesCS1D02G365400	C1	3.01608	0.981057	0.929336	1.46121	1.65552	AT5G11840	AT5G11840	YCF36, putative (DUF1230);(source:Araport11)
TraesCS1D02G365500	C1	11.6035	10.9499	7.34807	6.92206	6.53906	NA	NA	NA
TraesCS1D02G366400	C1	803.689	409.317	739.129	590.566	598.055	NA	NA	NA
TraesCS1D02G366500	C1	44.568	21.725	35.7974	23.9822	24.718	AT1G07660	AT1G07660	Histone superfamily protein;(source:Araport11)
TraesCS1D02G366700	C1	9.0093	0.188155	0	0	0	AT4G36220;AT5G04330	CYP84A1;CYP84A4	encodes ferulate 5-hydroxylase (F5H). Involved in lignin biosynthesis.;Cytochrome P450 superfamily protein;(source:Araport11)
TraesCS1D02G366800	C1	8.57519	6.53187	7.79174	6.91861	6.88116	AT1G73100;AT5G04940	SUVH3;SUVH1	Encodes a SU(VAR)3-9 homolog, a SET domain protein. Known SET domain proteins are involved in epigenetic control of gene expression and act as histone methyltransferases. There are 10 SUVH genes in Arabidopsis and members of this subfamily of the SET proteins have an additional conserved SRA domain.;Encodes a SU(VAR)3-9 homolog, a SET domain protein. Known SET domain proteins are involved in epig…
TraesCS1D02G367000	C1	34.291	6.36979	3.03233	11.0801	9.97331	NA	NA	NA
TraesCS1D02G367700	C1	3.70046	3.38632	0.534625	0.589049	0.39408	AT3G21330	BHLH87	basic helix-loop-helix (bHLH) DNA-binding superfamily protein;(source:Araport11)
TraesCS1D02G368000	C1	253.651	87.7865	148.901	111.127	125.9	NA	NA	NA
TraesCS1D02G368100	C1	10.6965	9.94664	7.98553	9.47695	8.36143	AT1G26670;AT3G29100;AT5G39510;AT5G39630	VTI12;VTI13;VTI11;AT5G39630	member of VTI1 Gene Family. Normally localizes to the transgolgi network and plasma membrane. A dominant mutation (zip1) alters the subcellular localization of VTI12 and suppresses loss of function mutation (zag1) of VTI11. Interacts with members of the SYP family. Involved in protein trafficking to protein storage vacuoles.;Encodes a member of the Arabidopsis v-SNARE (vesicle soluble NSF attachm…
TraesCS1D02G369500	C1	43.4296	9.27284	40.1612	25.0024	8.46474	NA	NA	NA
TraesCS1D02G369700	C1	46.4484	35.247	12.5092	9.17214	2.53117	NA	NA	NA
TraesCS1D02G369800	C1	575.38	383.076	404.403	165.74	71.0329	NA	NA	NA
TraesCS1D02G370100	C1	3.51203	3.50168	1.10892	1.16168	1.28052	NA	NA	NA
TraesCS1D02G370700	C1	18.5249	0.095453	2.43118	0.820109	1.76864	NA	NA	NA
TraesCS1D02G370800	C1	12.2707	0.307407	0.693594	4.4284	3.22402	NA	NA	NA
TraesCS1D02G371400	C1	0.983903	0.0312336	0	0.0565095	0.01723	NA	NA	NA
TraesCS1D02G372000	C1	15.0498	8.66886	10.3295	11.237	8.09308	AT2G21510;AT4G39150	AT2G21510;AT4G39150	DNAJ heat shock N-terminal domain-containing protein;(source:Araport11);DNAJ heat shock N-terminal domain-containing protein;(source:Araport11)
TraesCS1D02G372200	C1	5.1409	4.08405	1.73924	3.76399	2.1017	AT1G19650;AT1G75370;AT2G21520;AT4G39170	SFH4;AT1G75370;AT2G21520;SFH6	Sec14p-like phosphatidylinositol transfer family protein;(source:Araport11);Sec14p-like phosphatidylinositol transfer family protein;(source:Araport11);Sec14p-like phosphatidylinositol transfer family protein;(source:Araport11);Sec14p-like phosphatidylinositol transfer family protein;(source:Araport11)
TraesCS1D02G372400	C1	4.85393	0.039664	0	0.151218	0.249806	AT1G05100;AT2G32510;AT4G26890;AT5G55090	MAPKKK18;MAPKKK17;MAPKKK16;MAPKKK15	member of MEKK subfamily. Negatively regulated by RGLG1 and RGLG2; involved in drought stress tolerance.;Member of MEKK subfamily involved in wound and JA induced signaling.Interacts with At5g40440, and activates At1g59580.;Member of MEKK subfamily. Involved in wound response signaling. Interacts with At5g40440, and activates At1g59580.;member of MEKK subfamily
TraesCS1D02G372500	C1	7.13069	0.0981348	0.0181594	0.14598	0.243814	AT1G05100;AT2G32510;AT4G26890;AT5G55090	MAPKKK18;MAPKKK17;MAPKKK16;MAPKKK15	member of MEKK subfamily. Negatively regulated by RGLG1 and RGLG2; involved in drought stress tolerance.;Member of MEKK subfamily involved in wound and JA induced signaling.Interacts with At5g40440, and activates At1g59580.;Member of MEKK subfamily. Involved in wound response signaling. Interacts with At5g40440, and activates At1g59580.;member of MEKK subfamily
TraesCS1D02G372600	C1	12.8652	0.151136	0.0398831	0.257354	0.394482	AT1G05100;AT2G32510;AT4G26890;AT5G55090	MAPKKK18;MAPKKK17;MAPKKK16;MAPKKK15	member of MEKK subfamily. Negatively regulated by RGLG1 and RGLG2; involved in drought stress tolerance.;Member of MEKK subfamily involved in wound and JA induced signaling.Interacts with At5g40440, and activates At1g59580.;Member of MEKK subfamily. Involved in wound response signaling. Interacts with At5g40440, and activates At1g59580.;member of MEKK subfamily
TraesCS1D02G372700	C1	39.7506	0.0910181	0.0578147	0.171213	0.495514	AT1G05100;AT2G32510;AT4G26890;AT5G55090	MAPKKK18;MAPKKK17;MAPKKK16;MAPKKK15	member of MEKK subfamily. Negatively regulated by RGLG1 and RGLG2; involved in drought stress tolerance.;Member of MEKK subfamily involved in wound and JA induced signaling.Interacts with At5g40440, and activates At1g59580.;Member of MEKK subfamily. Involved in wound response signaling. Interacts with At5g40440, and activates At1g59580.;member of MEKK subfamily
TraesCS1D02G372800	C1	14.989	0	0.110566	0.205784	0.179338	AT1G05100;AT2G32510;AT4G26890;AT5G55090	MAPKKK18;MAPKKK17;MAPKKK16;MAPKKK15	member of MEKK subfamily. Negatively regulated by RGLG1 and RGLG2; involved in drought stress tolerance.;Member of MEKK subfamily involved in wound and JA induced signaling.Interacts with At5g40440, and activates At1g59580.;Member of MEKK subfamily. Involved in wound response signaling. Interacts with At5g40440, and activates At1g59580.;member of MEKK subfamily
TraesCS1D02G372900	C1	1.98025	0.441878	0.0924994	0.266867	0.404946	AT1G05100;AT2G32510;AT4G26890;AT5G55090	MAPKKK18;MAPKKK17;MAPKKK16;MAPKKK15	member of MEKK subfamily. Negatively regulated by RGLG1 and RGLG2; involved in drought stress tolerance.;Member of MEKK subfamily involved in wound and JA induced signaling.Interacts with At5g40440, and activates At1g59580.;Member of MEKK subfamily. Involved in wound response signaling. Interacts with At5g40440, and activates At1g59580.;member of MEKK subfamily
TraesCS1D02G373800	C1	355.589	81.5953	216.87	191.219	206.338	AT1G07790;AT2G28720;AT2G37470;AT3G09480;AT3G45980;AT3G46030;AT3G53650;AT5G02570;AT5G22880;AT5G59910	HTB1;AT2G28720;AT2G37470;AT3G09480;H2B;HTB11;AT3G53650;AT5G02570;H2B;HTB4	Encodes a histone 2B (H2B) protein.;Histone superfamily protein;(source:Araport11);Histone superfamily protein;(source:Araport11);Histone superfamily protein;(source:Araport11);Encodes a histone 2B (H2B) protein. This protein can be ubiquitinated in planta, and this modification depends on the HUB1 and HUB2 E3 ubiquitin ligases as well as the UBC1 and UBC2 E2 ubiquitin conjugating enzymes. Lysine…
TraesCS1D02G375500	C1	0.228881	0.077473	0.01745	0	0.015865	AT1G48600;AT1G73600;AT3G18000	NMT2;AT1G73600;NMT1	Encodes a phosphoethanolamine N-methyltransferase that catalyses the last two methylation steps of the three sequential methylations of phosphoethanolamine (PEA) that are required for the synthesis of phosphocholine (PCho) in plants.;Encodes a S-adenosyl-L-methionine-dependent phosphoethanolamine N-methyltransferase whose expression is responsive to both phosphate (Pi) and phosphite (Phi) in root…
TraesCS1D02G375700	C1	26.9247	6.34854	1.87927	8.58099	6.59075	AT1G48600;AT1G73600;AT3G18000	NMT2;AT1G73600;NMT1	Encodes a phosphoethanolamine N-methyltransferase that catalyses the last two methylation steps of the three sequential methylations of phosphoethanolamine (PEA) that are required for the synthesis of phosphocholine (PCho) in plants.;Encodes a S-adenosyl-L-methionine-dependent phosphoethanolamine N-methyltransferase whose expression is responsive to both phosphate (Pi) and phosphite (Phi) in root…
TraesCS1D02G375800	C1	25.2416	21.4935	18.8928	22.4861	16.3061	AT1G14910;AT2G01600	AT1G14910;AT2G01600	ANTH domain-containing protein which functions as adaptor protein for clathrin-mediated endocytosis (CME) of the secretory vesicle-associated longintype R-SNARE VAMP72 group. Interacts with the SNARE domain of VAMP72 and clathrin at the plasma membrane. Required for recycling of R-SNARE proteins.;ANTH domain-containing protein which functions as adaptor protein for clathrin-mediated endocytosis (…
TraesCS1D02G376500	C1	107.45	0.0871602	0	0	0.0454238	AT4G34410	ERF109	Encodes a member of the ERF (ethylene response factor) subfamily B-3 of ERF/AP2 transcription factor family. The protein contains one AP2 domain. There are 18 members in this subfamily including ATERF-1, ATERF-2, AND ATERF-5. Regulates programmed cell death (PCD) inhibitor genes. Involved in retarding programmed cell death under salt stress due to the regulation of processes participating in ROS …
TraesCS1D02G376600	C1	109.388	0.0887022	0.0261679	0.269728	0.493532	AT4G34410	ERF109	Encodes a member of the ERF (ethylene response factor) subfamily B-3 of ERF/AP2 transcription factor family. The protein contains one AP2 domain. There are 18 members in this subfamily including ATERF-1, ATERF-2, AND ATERF-5. Regulates programmed cell death (PCD) inhibitor genes. Involved in retarding programmed cell death under salt stress due to the regulation of processes participating in ROS …
TraesCS1D02G376700	C1	93.3026	0.0918223	0	0.054056	0.284432	NA	NA	NA
TraesCS1D02G376800	C1	46.6538	0.0179794	0	0.0435511	0.0192966	AT4G34410	ERF109	Encodes a member of the ERF (ethylene response factor) subfamily B-3 of ERF/AP2 transcription factor family. The protein contains one AP2 domain. There are 18 members in this subfamily including ATERF-1, ATERF-2, AND ATERF-5. Regulates programmed cell death (PCD) inhibitor genes. Involved in retarding programmed cell death under salt stress due to the regulation of processes participating in ROS …
TraesCS1D02G378600	C1	68.3876	41.9094	42.0904	41.6313	33.3815	AT1G72810;AT4G29840	TS2;TS1	Pyridoxal-5-phosphate-dependent enzyme family protein;(source:Araport11);threonine synthase
TraesCS1D02G381300	C1	0.697302	0.454317	0.156421	0	0	NA	NA	NA
TraesCS1D02G382400	C1	1.13357	0.403764	0.0864368	0.850882	1.00132	AT1G78130;AT5G10190	UNE2;AT5G10190	Major facilitator superfamily protein;(source:Araport11);Major facilitator superfamily protein;(source:Araport11)
TraesCS1D02G382900	C1	288.566	9.95053	7.41616	28.575	19.9073	AT3G22830;AT3G51910;AT3G63350;AT5G43840	HSFA6B;HSFA7A;HSFA7B;HSFA6A	member of Heat Stress Transcription Factor (Hsf) family;member of Heat Stress Transcription Factor (Hsf) family The mRNA is cell-to-cell mobile.;member of Heat Stress Transcription Factor (Hsf) family;member of Heat Stress Transcription Factor (Hsf) family
TraesCS1D02G383600	C1	4.17837	2.40458	1.55002	1.06675	1.95917	AT1G25410;AT1G68460;AT3G19160;AT4G24650	IPT6;IPT1;IPT8;IPT4	AB061404 Arabidopsis thaliana AtIPT6 mRNA for cytokinin synthase, complete cds;Encodes a putative adenylate isopentenyltransferase. It catalyzes the formation of isopentenyladenosine 5'-monophosphate (iPMP) from AMP and dimethylallylpyrophosphate (DMAPP), but it has a lower Km for ADP and likely works using ADP or ATP in plants. It is involved in cytokinin biosynthesis.;Encodes cytokinin synthase…
TraesCS1D02G385400	C1	7.41736	0.0328141	0.0352635	0.228808	0.316648	NA	NA	NA
TraesCS1D02G386800	C1	18.2452	4.508	1.42837	0.816874	0.766857	AT3G03980;AT3G04000;AT5G18210	AT3G03980;ChlADR2;AT5G18210	NAD(P)-binding Rossmann-fold superfamily protein;(source:Araport11);ChlADR is an aldehyde reductase that catalyzes the reduction of the aldehyde carbonyl groups on saturated and alpha,beta-unsaturated aldehydes with more than 5 carbons in vitro. The N-terminal region of this protein directs GFP to the chloroplast where where ChlADR likely helps to maintain the photosynthetic process by detoxifyin…
TraesCS1D02G386900	C1	1.17432	0.12978	0.0549576	0	0.0268585	NA	NA	NA
TraesCS1D02G387800	C1	0.690209	0.0325612	0.0924021	0.127223	0.0688649	NA	NA	NA
TraesCS1D02G389100	C1	208.404	1.4526	0.122204	1.11023	0.95814	NA	NA	NA
TraesCS1D02G389200	C1	156.632	2.16567	1.24249	4.90969	3.88723	NA	NA	NA
TraesCS1D02G391000	C1	1.28722	0.033504	0.0367889	0	0.145847	AT4G32590	AT4G32590	2Fe-2S ferredoxin-like superfamily protein;(source:Araport11)
TraesCS1D02G392100	C1	0.353484	0	0	0.0115219	0.0589903	NA	NA	NA
TraesCS1D02G394500	C1	2.38225	2.43947	1.00122	1.32799	0.70266	AT1G68380;AT1G68390;AT1G73810	AT1G68380;AT1G68390;AT1G73810	Core-2/I-branching beta-1,6-N-acetylglucosaminyltransferase family protein;(source:Araport11);Core-2/I-branching beta-1,6-N-acetylglucosaminyltransferase family protein;(source:Araport11);Core-2/I-branching beta-1,6-N-acetylglucosaminyltransferase family protein;(source:Araport11)
TraesCS1D02G395200	C1	1.14678	0.0781977	0.106758	0.124916	0.183657	AT3G12700	NANA	Encodes an aspartic protease has an important regulatory function in chloroplasts that not only influences photosynthetic carbon metabolism but also plastid and nuclear gene expression.
TraesCS1D02G395600	C1	0.548882	0.140544	0.0825519	0.175749	0.422259	NA	NA	NA
TraesCS1D02G397600	C1	15.9321	12.1357	13.5823	17.1377	10.8466	AT4G28910	AFPH2	Encodes a transcriptional repressor that functions in the jasmonic acid (JA) signalling pathway, root development, and has a key role in leaf development, likely due to the transcriptional regulation of CYCD3 expression. Transcriptional repressor that accumulates in short-day conditions. Regulates together with FRS7 and FRS12 glucosinolate biosynthesis.
TraesCS1D02G398100	C1	2.32886	0.0776496	0.337869	0.343642	1.00182	AT5G11550	AT5G11550	ARM repeat superfamily protein;(source:Araport11)
TraesCS1D02G398600	C1	3.99595	1.57288	1.66193	2.30486	2.88067	AT3G07310;AT5G48590	AT3G07310;AT5G48590	phosphoserine aminotransferase, putative (DUF760);(source:Araport11);phosphoserine aminotransferase, putative (DUF760);(source:Araport11)
TraesCS1D02G399400	C1	3.04757	1.02521	0.149355	0.136473	0.0399482	NA	NA	NA
TraesCS1D02G400700	C1	4.1784	0.271342	0	0	0	NA	NA	NA
TraesCS1D02G400800	C1	0.987492	0	0	0	0	NA	NA	NA
TraesCS1D02G402000	C1	37.6724	5.33474	5.51005	6.49987	6.19946	AT4G28300	AT4G28300	Encodes a protein with 13.6% proline amino acids that is predicted to localize to the cell wall. The mRNA is cell-to-cell mobile.
TraesCS1D02G402900	C1	0.225134	0	0	0	0	NA	NA	NA
TraesCS1D02G403500	C1	512.64	31.1621	14.7245	37.6122	34.0546	NA	NA	NA
TraesCS1D02G404800	C1	56.5737	0.665057	0.698723	3.50847	2.29033	AT1G28480	GRXC9	Encodes GRX480, a member of the glutaredoxin family that regulates protein redox state. GRX480 interacts with TGA factors and suppresses JA-responsive PDF1.2 transcription. GRX480 transcription is SA-inducible and requires NPR1. Maybe involved in SA/JA cross-talk. It has also been shown to interact with the transcription factor TGA2 and suppress ORA59 promoter activity.
TraesCS1D02G405200	C1	47.1628	1.58478	6.86449	3.26808	2.31944	AT1G28480	GRXC9	Encodes GRX480, a member of the glutaredoxin family that regulates protein redox state. GRX480 interacts with TGA factors and suppresses JA-responsive PDF1.2 transcription. GRX480 transcription is SA-inducible and requires NPR1. Maybe involved in SA/JA cross-talk. It has also been shown to interact with the transcription factor TGA2 and suppress ORA59 promoter activity.
TraesCS1D02G405800	C1	21.6702	6.30089	5.46975	5.51109	3.65797	AT1G53190;AT3G15070	AT1G53190;AT3G15070	Encodes a RING-type E3 ligase that positively regulates CIN-like TCP activity to promote leaf development by mediating the degradation of the TCP repressor TIE1.;Encodes a RING-type E3 ligase that positively regulates CIN-like TCP activity to promote leaf development by mediating the degradation of the TCP repressor TIE1.
TraesCS1D02G408500	C1	14.5486	11.0239	6.29255	6.2168	7.52938	NA	NA	NA
TraesCS1D02G408800	C1	0.268949	0.157873	0.109769	0.191732	0.105335	NA	NA	NA
TraesCS1D02G410100	C1	33.1056	3.07916	1.83648	3.38497	3.19845	NA	NA	NA
TraesCS1D02G410200	C1	8.27099	5.5853	0.741022	2.78577	2.26416	AT5G28840	GME	Encodes a protein with GDP-D-mannose 3',5'-epimerase activity. The enzyme is involved in ascorbate biosynthesis. It catalyzes the conversion of GDP-D-mannose to GDP-L-galactose.
TraesCS1D02G411100	C1	379.639	184.915	127.085	62.2455	65.4047	NA	NA	NA
TraesCS1D02G412200	C1	139.759	67.7406	70.4461	137.186	99.6529	AT1G11910;AT1G62290;AT4G04460	APA1;APA2;APA3	Encodes an aspartic proteinase that forms a heterodimer and is stable over a broad pH range (ph 3-8).;Saposin-like aspartyl protease family protein;(source:Araport11);Saposin-like aspartyl protease family protein;(source:Araport11)
TraesCS1D02G412800	C1	3.21887	0.767522	0.0855532	0	0	NA	NA	NA
TraesCS1D02G412900	C1	4.71301	0	0	0	0	NA	NA	NA
TraesCS1D02G413000	C1	33.7566	0	0	0	0	NA	NA	NA
TraesCS1D02G413100	C1	13.2547	0.0486269	0	0.0517324	0	NA	NA	NA
TraesCS1D02G413300	C1	1.46681	0.211341	0.108989	0	0.10951	NA	NA	NA
TraesCS1D02G413400	C1	3.43764	0.579679	0.239507	1.08557	0	NA	NA	NA
TraesCS1D02G413600	C1	0.781075	0.287887	0.118472	0.554014	0.316135	AT1G19450;AT1G75220	AT1G19450;AT1G75220	Major facilitator superfamily protein;(source:Araport11);Encodes a vacuolar glucose exporter that is induced in response to factors that activate vacuolar glucose pools like darkness, heat stress and wounding and repressed during conditions that trigger glucose accumulation in the vacuole like cold stress and external sugar supply.
TraesCS1D02G414900	C1	0.923434	0.159916	0	0	0.321617	AT3G27830;AT3G27840;AT3G27850	RPL12A;RPL12B;RPL12C	50S ribosomal protein L12-AThe mRNA is cell-to-cell mobile.;50S ribosomal protein L12-B;50S ribosomal protein L12-C The mRNA is cell-to-cell mobile.
TraesCS1D02G415100	C1	1.75864	0.102074	0.108989	0	0	NA	NA	NA
TraesCS1D02G415200	C1	2.45431	0.40794	0.244554	0.0574219	0.0296887	NA	NA	NA
TraesCS1D02G416000	C1	15.6208	1.50848	0.788191	1.23732	1.68935	AT3G27925	DEGP1	Encodes a DegP protease; nuclear gene encoding chloroplast-targeted protease that can degrade two lumenal proteins, plastocyanin and OE33, suggesting a role as a general-purpose protease in the thylakoid lumen. Involved in the degradation of D1 protein of PS II, hence participating in the repair of PS II damages caused by photoinhibition. The mRNA is cell-to-cell mobile.
TraesCS1D02G416100	C1	5.27312	2.12225	1.96812	4.06505	3.6196	NA	NA	NA
TraesCS1D02G418400	C1	7.55355	0.762718	1.04358	1.76599	2.96657	AT2G46400	WRKY46	Encodes a WRKY transcription factor that contributes to the feedforward inhibition of osmotic/salt stress-dependent LR inhibition via regulation of ABA signaling and auxin homeostasis.
TraesCS1D02G418500	C1	2.47137	0.0194294	0.244701	0.456454	0.764628	AT2G46400	WRKY46	Encodes a WRKY transcription factor that contributes to the feedforward inhibition of osmotic/salt stress-dependent LR inhibition via regulation of ABA signaling and auxin homeostasis.
TraesCS1D02G418700	C1	3.34964	2.96708	1.87107	1.84003	2.30605	AT1G64355	AT1G64355	1-acyl-sn-glycerol-3-phosphate acyltransferase;(source:Araport11)
TraesCS1D02G419500	C1	13.4859	8.29666	9.54244	11.0192	9.73773	AT2G37060;AT2G38880;AT3G53340	NFYB8;NF-YB1;NFYB10	nuclear factor Y, subunit B8;(source:Araport11);Encodes a transcription factor from the nuclear factor Y (NF-Y) family, AtNF-YB1. Confers drought tolerance.;nuclear factor Y, subunit B10;(source:Araport11)
TraesCS1D02G420500	C1	203.015	180.966	167.207	113.702	93.1228	AT1G53240;AT3G15020	mMDH1;mMDH2	mMDH1 encodes a mitochrondrial malate dehydrogenase. It is expressed at higher levels than the other mitochrondrial isoform mMDH2 (At3G15020) according to transcript and proteomic analyses.;Lactate/malate dehydrogenase family protein;(source:Araport11)
TraesCS1D02G421100	C1	4.37439	0.719052	0.311752	0.404771	0.0849403	NA	NA	NA
TraesCS1D02G421700	C1	0.842444	0.412866	0.0321112	0.18361	0.172068	AT1G66810	AT1G66810	Encodes a tandem CCCH zinc finger (TZF) protein that can bind DNA and RNA, function as a transcriptional activator, and is involved in secondary wall biosynthesis.
TraesCS1D02G421800	C1	2.71112	1.19742	0.504712	0.458488	0.489564	AT1G66810	AT1G66810	Encodes a tandem CCCH zinc finger (TZF) protein that can bind DNA and RNA, function as a transcriptional activator, and is involved in secondary wall biosynthesis.
TraesCS1D02G422600	C1	100.948	14.4273	27.1547	4.24995	2.204	NA	NA	NA
TraesCS1D02G423800	C1	35.6074	9.71876	15.9428	20.6436	21.6314	AT3G01490;AT5G50000	AT3G01490;AT5G50000	Belongs to the Raf-like kinase subfamily of the mitogen-activated protein kinase kinase kinase (MAPKKK) family. Negatively regulates stomatal opening by negatively regulating plasma membrane H+-ATPase phosphorylation.;Belongs to the Raf-like kinase subfamily of the mitogen-activated protein kinase kinase kinase (MAPKKK) family. Negatively regulates stomatal opening by negatively regulating plasma…
TraesCS1D02G424500	C1	1021.11	6.18227	0.139978	6.98414	5.42187	AT3G10020	AT3G10020	plant/protein;(source:Araport11)
TraesCS1D02G425200	C1	0.401219	0.208655	0.0207974	0.0602762	0.0796131	NA	NA	NA
TraesCS1D02G426300	C1	0.691531	0	0	0.117511	0.493165	AT1G75240;AT2G18350;AT3G50890	ZHD5;ZHD6;ZHD7	Encodes a zinc finger-homeodomain transcription factor ZHD5. Nuclear import and DNA binding of the ZHD5 transcription factor is modulated by a competitive peptide inhibitor MIF1 (AT1G74660).;homeobox protein 24;(source:Araport11);homeobox protein 28;(source:Araport11)
TraesCS1D02G427400	C1	88.7285	84.2465	90.1149	91.133	56.1947	AT1G27680;AT2G21590;AT4G39210	APL2;APL4;APL3	ADP-glucose pyrophosphorylase catalyzes the first, rate limiting step in starch biosynthesis. The large subunit plays a regulatory role whereas the small subunit (ApS) is the catalytic isoform. Four isoforms of the large subunit (ApL1-4) have been described.Mutational analysis of APS1 suggests that APL1 and APL2 can compensate for loss of APS1 catalytic activity,suggesting both have catalytic as …
TraesCS1D02G427800	C1	4.17868	4.36801	2.73687	3.30839	3.61153	AT5G05490	SYN1	Encodes a RAD21-like gene essential for meiosis. Encodes a 627 a.a. protein that is slightly longer in the N-terminus than SYN1 BP5.
TraesCS1D02G428300	C1	26.988	3.34627	2.94856	14.9272	21.0141	NA	NA	NA
TraesCS1D02G428600	C1	1.37117	0	0	0.0260194	0	AT2G42900	AT2G42900	Plant basic secretory protein (BSP) family protein;(source:Araport11)
TraesCS1D02G432400	C1	61.3206	13.3767	19.9432	10.0894	6.01224	AT1G01470;AT2G46140	LEA14;AT2G46140	Encodes late-embryogenesis abundant protein whose mRNA levels are induced in response to wounding and light stress. Might be involved in protection against desiccation.;Late embryogenesis abundant protein;(source:Araport11)
TraesCS1D02G432800	C1	0.238625	0.0255096	0.027605	0	0.0381998	AT4G27970	SLAH2	Encodes a protein with ten predicted transmembrane helices. The SLAH2 protein has similarity to the SLAC1 protein involved in ion homeostasis in guard cells. But, it is not expressed in guard cells and cannot complement a slac1-2 mutant suggesting that it performs a different function. SLAH2:GFP localizes to the plasma membrane.
TraesCS1D02G433100	C1	0.656161	0.0126681	0.015373	0.345694	0.179551	AT4G27970	SLAH2	Encodes a protein with ten predicted transmembrane helices. The SLAH2 protein has similarity to the SLAC1 protein involved in ion homeostasis in guard cells. But, it is not expressed in guard cells and cannot complement a slac1-2 mutant suggesting that it performs a different function. SLAH2:GFP localizes to the plasma membrane.
TraesCS1D02G433300	C1	0.964521	0.0267231	0.525711	1.01513	0.329918	AT2G46225	ABIL1	Encodes a subunit of the WAVE complex. The WAVE complex is required for activation of ARP2/3 complex which functions in actin microfilament nucleation and branching. One of four ABI-like proteins.
TraesCS1D02G434100	C1	7.09497	4.52778	1.69553	1.0131	1.338	AT2G46370	JAR1	Encodes a jasmonate-amido synthetase that is a member of the GH3 family of proteins. JAR1 catalyzes the formation of a biologically active jasmonyl-isoleucine (JA-Ile) conjugate. JA-Ile promotes the interaction between JAZ1 and COI1 in the jasmonate signaling pathway. JAR1 localizes to the cytoplasm and is also a phytochrome A signaling component. JAR1 is an auxin-induced gene. Loss of function m…
TraesCS1D02G434200	C1	11.4425	3.94621	7.90414	6.93852	6.49589	AT1G01440;AT2G46380;AT3G61670;AT4G01090	AT1G01440;AT2G46380;AT3G61670;AT4G01090	hypothetical protein (DUF3133);(source:Araport11);extra-large G-like protein, putative (DUF3133);(source:Araport11);extra-large G-like protein, putative (DUF3133);(source:Araport11);Hypothetical protein; participates in wound-induced lateral root development.
TraesCS1D02G437100	C1	12.6164	2.73142	4.45856	6.3474	3.69655	AT1G53300;AT2G42580;AT3G14950;AT3G58620	TTL1;TTL3;TTL2;TTL4	Encodes one of the 36 carboxylate clamp (CC)-tetratricopeptide repeat (TPR) proteins (Prasad 2010, Pubmed ID: 20856808) with potential to interact with Hsp90/Hsp70 as co-chaperones. The TTL family is required for osmotic stress tolerance and male sporogenesis. The mRNA is cell-to-cell mobile.;Encodes a member of the TTL family and contains a thioredoxin like domain and three tandom TPRs. Interact…
TraesCS1D02G440600	C1	4.39313	2.80802	2.85811	3.86868	2.91994	AT3G01510	LSF1	Encodes a putative phosphatase, LSF1, required for normal starch turnover in leaves.
TraesCS1D02G441300	C1	0.833324	0.173126	0.192807	0.160594	0.526482	NA	NA	NA
TraesCS1D02G442500	C1	2.1823	0.833875	1.28598	1.33894	1.60417	AT1G55200;AT3G13690;AT5G56790	AT1G55200;AT3G13690;AT5G56790	kinase with adenine nucleotide alpha hydrolases-like domain-containing protein;(source:Araport11);kinase with adenine nucleotide alpha hydrolases-like domain-containing protein;(source:Araport11);Protein kinase superfamily protein;(source:Araport11)
TraesCS1D02G451900	C1	95.8104	19.9757	8.59825	13.2595	7.61914	AT1G64440;AT4G10960;AT4G23920	UGE4;UGE5;UGE2	Encodes a protein with UDP-D-glucose 4-epimerase activity. Mutants in RHD1 have abnormally shaped root hairs with a bulbous region at the base. Allelic to REB1 encoding a UDP-D-glucose 4-epimerase involved in cell wall biosynthesis.Involved in growth and cell wall carbohydrate biosynthesis.;Encodes a protein with UDP-D-glucose 4-epimerase activity.;Encodes a protein with UDP-D-glucose 4-epimerase…
TraesCS1D02G452900	C1	19.5142	15.267	7.03483	11.7851	5.623	NA	NA	NA
TraesCS2A02G000700	C1	5.0811	4.68979	2.44204	4.39291	2.54497	NA	NA	NA
TraesCS2A02G005200	C1	4.05981	1.5915	1.42235	2.22968	1.92065	AT1G47840;AT1G47845	HXK3;AT1G47845	Encodes a putative hexokinase.;hexokinase;(source:Araport11)
TraesCS2A02G010100	C1	89.5408	59.7125	37.2294	31.1276	25.912	AT1G01090	PDH-E1 ALPHA	pyruvate dehydrogenase E1 alpha subunit
TraesCS2A02G010200	C1	15.9487	13.1751	6.26987	7.36565	8.27019	AT1G64720;AT5G54170	CP5;AT5G54170	membrane related protein CP5;Polyketide cyclase/dehydrase and lipid transport superfamily protein;(source:Araport11)
TraesCS2A02G010900	C1	4.52339	0.916671	0.464413	0.205901	0.215355	AT1G09320	AT1G09320	Heterochromatin-binding protein which can bind to three H3K9me2 tails. Preferentially binds to long TEs. Required for transcriptional silencing, non-CG DNA methylation, and H3K9 dimethylation at some loci.
TraesCS2A02G011000	C1	0.330277	0.0709999	0	0	0	AT3G01970	WRKY45	member of WRKY Transcription Factor; Group I
TraesCS2A02G014300	C1	66.7433	10.9699	6.17251	12.2201	10.8674	NA	NA	NA
TraesCS2A02G024800	C1	3.17112	0.45227	0	0.791171	2.10138	AT1G51270;AT2G23830;AT2G45140	AT1G51270;PVA31;PVA12	vesicle-associated protein 1-4;(source:Araport11);PapD-like superfamily protein;(source:Araport11);Encodes a Plant VAMP-Associated protein that localizes to the ER and binds to the sitosterol-binding protein ORP3a. The WFDE motif in ORP3a appears to be important for this direct interaction. Mutation of this motif causes ORP3a to relocalize to the Golgi and cytosol. The interaction between PVA12 a…
TraesCS2A02G024900	C1	3.6507	0.100296	0.104717	0.549659	0.938294	NA	NA	NA
TraesCS2A02G026500	C1	0.788325	0	0	0	0.0439733	NA	NA	NA
TraesCS2A02G029800	C1	12.6	4.43992	7.2393	6.42447	4.5576	NA	NA	NA
TraesCS2A02G029900	C1	0.188573	0.0594412	0.0669587	0.108016	0.15682	NA	NA	NA
TraesCS2A02G030200	C1	8.66998	3.07367	4.86213	8.24613	7.59628	NA	NA	NA
TraesCS2A02G031300	C1	1.61072	0.132993	0	0.134648	0.161901	NA	NA	NA
TraesCS2A02G033700	C1	1031.9	8.25507	1.89964	14.7984	7.17354	AT5G52640	HSP90-1	Encodes a cytosolic heat shock protein AtHSP90.1. AtHSP90.1 interacts with disease resistance signaling components SGT1b and RAR1 and is required for RPS2-mediated resistance. The mRNA is cell-to-cell mobile.
TraesCS2A02G035000	C1	1.81235	1.35509	0.97882	1.27424	1.44125	NA	NA	NA
TraesCS2A02G036300	C1	33.7503	29.2032	16.7652	16.0631	9.62101	AT5G47720;AT5G48230	AT5G47720;AAT1	Encodes a functional acetoacetyl-CoA thiolase that is functionally redundant with AACT2. Loss-of-function mutants show no apparent growth phenotypes.;Encodes an acetoacetyl-CoA thiolase that generates the bulk of the acetoacetyl-CoA precursor needed for the cytosolic localized, mevalonate-derived isoprenoids biosynthetic pathway. Loss-of-function mutants are embryo lethal.
TraesCS2A02G040300	C1	19.8439	4.70034	3.72979	4.0459	3.8734	AT1G27600	IRX9H	Encodes a member of the GT43 family glycosyltransferases involved in glucuronoxylan biosynthesis: AT2G37090 (IRX9) and AT1G27600 (IRX9-L or I9H, IRX9 homolog); AT4G36890 (IRX14) and AT5G67230 (IRX14-L or I14H, IRX14 homolog). They form two functionally non-redundant groups essential for the normal elongation of glucuronoxylan backbone. I9H functions redundantly with IRX9, I14H is redundant with I…
TraesCS2A02G041300	C1	12.0397	10.132	7.87834	11.4954	6.97587	AT5G64440	FAAH	AtFAAH (fatty acid amide hydrolase) modulates endogenous NAEs (N-Acylethanolamines) levels in plants by hydrolyzing NAEs to ethanolamine and their corresponding free fatty acids. NAE depletion likely participates in the regulation of plant growth. The mRNA is cell-to-cell mobile.
TraesCS2A02G041400	C1	3.94682	0.0394211	0.0147524	0.128568	0.118443	AT5G64440	FAAH	AtFAAH (fatty acid amide hydrolase) modulates endogenous NAEs (N-Acylethanolamines) levels in plants by hydrolyzing NAEs to ethanolamine and their corresponding free fatty acids. NAE depletion likely participates in the regulation of plant growth. The mRNA is cell-to-cell mobile.
TraesCS2A02G043300	C1	0.375072	0	0	0	0.110003	NA	NA	NA
TraesCS2A02G043500	C1	0.271171	0.14553	0	0	0	NA	NA	NA
TraesCS2A02G045100	C1	6.2935	6.60117	3.50744	6.17104	6.21992	AT5G49665	WAV3	Zinc finger (C3HC4-type RING finger) family protein;(source:Araport11)
TraesCS2A02G046000	C1	22.2227	9.39495	4.59078	0.133243	0.0301399	AT1G11610;AT2G30750;AT2G30770;AT3G48270;AT3G48280;AT3G48290;AT3G48300;AT3G48310;AT3G48320;AT4G13290;AT4G13310;AT4G20235;AT4G20240;AT5G24950;AT5G24960;AT5G42590	CYP71A18;CYP71A12;CYP71A13;CYP71A26;CYP71A25;CYP71A24;CYP71A23;CYP71A22;CYP71A21;CYP71A19;CYP71A20;CYP71A28;CYP71A27;CYP71A15;CYP71A14;CYP71A16	putative cytochrome P450;Putative cytochrome P450; together with CYP71A13 produces dihydrocamalexic acid (DHCA), the precursor to the defense-related compound camalexin, which accumulates in the intercellular space and contributes to the resistance of mature Arabidopsis to P. syringae without directly inhibiting bacterial growth.;Putative cytochrome P450; together with CYP71A12 produces dihydroca…
TraesCS2A02G046200	C1	0.290988	0.258158	0	0.0330917	0.136974	AT1G71480	AT1G71480	Nuclear transport factor 2 (NTF2) family protein;(source:Araport11)
TraesCS2A02G046400	C1	0.351134	0.0409758	0.0464294	0.0941508	0.336238	AT1G08890;AT1G08900;AT1G08920;AT1G08930;AT1G54730;AT3G05155;AT3G05160;AT3G05165;AT3G05400;AT3G20460;AT4G04750;AT4G04760;AT5G27350;AT5G27360	SUGTL4;SUGTL3;ESL1;ERD6;AT1G54730;AT3G05155;AT3G05160;AT3G05165;SUGTL5;AT3G20460;AT4G04750;AT4G04760;SFP1;SFP2	Major facilitator superfamily protein;(source:Araport11);Major facilitator superfamily protein;(source:Araport11);Encodes ESL1, a transporter for monosaccharides.;encodes a putative sucrose transporter whose gene expression is induced by dehydration and cold. The mRNA is cell-to-cell mobile.;Major facilitator superfamily protein;(source:Araport11);Major facilitator superfamily protein;(source:Ara…
TraesCS2A02G049700	C1	2.27556	1.43465	1.57483	2.07322	1.69579	AT1G53390;AT2G37010;AT5G60740	ABCG24;WBC30;ABCG28	P-loop containing nucleoside triphosphate hydrolases superfamily protein;(source:Araport11);member of NAP subfamily;ABC transporter family protein. Localizes to the growing tip of pollen tubes where it appears to be critical for localizing polyamines and reactive oxygen species.
TraesCS2A02G050600	C1	84.149	16.4556	10.8934	21.2636	19.3363	AT3G25230;AT5G48570	ROF1;FKBP65	Encodes a a high molecular weight member of the FK506 binding protein (FKBP) family. It has three FKBP12-like domains, tetratricopeptide repeats, and a putative calmodulin binding domain. Modulates thermotolerance by interacting with HSP90.1 and affecting the accumulation of HsfA2-regulated sHSPs. Belongs to one of the 36 carboxylate clamp (CC)-tetratricopeptide repeat (TPR) proteins (Prasad 2010…
TraesCS2A02G053200	C1	0.238607	0.107851	0.0549133	0.00834342	0.06028	AT5G13410	FKBP19	FKBP-like peptidyl-prolyl cis-trans isomerase family protein;(source:Araport11)
TraesCS2A02G054200	C1	1.26951	0.0348331	0.0951811	0.270344	0.449111	NA	NA	NA
TraesCS2A02G058700	C1	0.86797	0.316184	0.249327	0.286697	0.299006	AT2G34860	PSA2	DnaJ-like zinc finger domain-containing protein which regulates the assembly of photosystem I (PSI) and seed development.
TraesCS2A02G061600	C1	1.01363	0	0	0	0	AT4G38300;AT4G38650	AT4G38300;AT4G38650	glycosyl hydrolase family 10 protein;(source:Araport11);Glycosyl hydrolase family 10 protein;(source:Araport11)
TraesCS2A02G065700	C1	127.712	5.09022	0.0460006	0.661351	2.12509	AT2G16850;AT4G35100	PIP2-8;PIP2-7	plasma membrane intrinsic protein 2;(source:Araport11);a member of the plasma membrane intrinsic protein PIP. functions as aquaporin. Salt-stress-inducible MIP
TraesCS2A02G066300	C1	7.33152	0.142632	0.0501731	0.705916	1.43198	AT4G03100	ROPGAP2	Rho GTPase activating protein with PAK-box/P21-Rho-binding domain-containing protein;(source:Araport11)
TraesCS2A02G069400	C1	57.6745	21.6474	20.2963	17.6794	14.5235	AT1G36160;AT1G36180	ACC1;ACC2	Encodes acetyl-CoA carboxylase. Mutant displays uncoordinated cell divisions which are enhanced by cytokinins. Mutant also has aberrant organization of the apical region in the embryo and abnormal root and shoot development and is deficient in freezing tolerance after cold acclimation. Essential for very long chain fatty acid elongation. The mRNA is cell-to-cell mobile.;Acetyl-CoA carboxylase 2 (…
TraesCS2A02G069600	C1	14.2357	11.379	10.7842	12.1033	13.8742	AT4G38495	AT4G38495	Subunit if INO80 chromatin remodeling complex. Along with EIN6 (REF6), redundantly controls the level and the localization of the repressive histone modification H3K27me3 and the histone variant H2A.
TraesCS2A02G070300	C1	41.3899	40.2579	36.6096	33.0648	29.8633	AT1G08110	AT1G08110	Encodes a Zn2+ dependent glyoxylase.
TraesCS2A02G070400	C1	0.795919	0.690359	0.459213	0.602749	0.416211	AT1G59520	CW7	Encodes CW7.
TraesCS2A02G071700	C1	26.7322	6.34984	0.0210265	0	0.0604117	NA	NA	NA
TraesCS2A02G075800	C1	71.5787	17.5953	20.8057	37.8452	38.715	NA	NA	NA
TraesCS2A02G081400	C1	62.2883	10.508	14.4258	12.9077	10.8366	AT1G07870;AT2G28590;AT5G02800	AT1G07870;PBL6;PBL7	Protein kinase superfamily protein;(source:Araport11);Protein kinase superfamily protein;(source:Araport11);Encodes CDL1, a homolog of CDG1. CDL1 positively regulates brassinosteroid signaling and plant growth.
TraesCS2A02G086900	C1	13.1967	7.97293	9.0765	10.0013	9.18337	AT2G40150;AT2G40160;AT3G55990	TBL28;TBL30;ESK1	Encodes a member of the TBL (TRICHOME BIREFRINGENCE-LIKE) gene family containing a plant-specific DUF231 (domain of unknown function) domain. TBL gene family has 46 members, two of which (TBR/AT5G06700 and TBL3/AT5G01360) have been shown to be involved in the synthesis and deposition of secondary wall cellulose, presumably by influencing the esterification state of pectic polymers. A nomenclature…
TraesCS2A02G089300	C1	6.68266	4.57098	4.96199	5.38042	6.2922	AT3G22830;AT3G51910;AT3G63350;AT5G43840	HSFA6B;HSFA7A;HSFA7B;HSFA6A	member of Heat Stress Transcription Factor (Hsf) family;member of Heat Stress Transcription Factor (Hsf) family The mRNA is cell-to-cell mobile.;member of Heat Stress Transcription Factor (Hsf) family;member of Heat Stress Transcription Factor (Hsf) family
TraesCS2A02G089400	C1	34.1932	1.66065	11.8597	22.6472	29.6311	AT2G38310;AT2G40330;AT5G05440	PYL4;PYL6;PYL5	Encodes a member of the PYR (pyrabactin resistance )/PYL(PYR1-like)/RCAR (regulatory components of ABA receptor) family proteins with 14 members. PYR/PYL/RCAR family proteins function as abscisic acid sensors. Mediate ABA-dependent regulation of protein phosphatase 2Cs ABI1 and ABI2. The mRNA is cell-to-cell mobile.;Encodes a member of the PYR (pyrabactin resistance )/PYL(PYR1-like)/RCAR (regulat…
TraesCS2A02G089500	C1	0.514922	0.111795	0.1438	0.400356	0.198471	AT3G42670;AT5G20420	CHR38;CLSY2	Encodes a nuclear localized SNF domain containing protein involved in RNA silencing. Mutants were identified in a screen for defects in the spread of RNA silencing. CLSY1 may affect production of dsRNA from the locus to be silenced. Locus-specific regulator of 24nt-siRNA expression, works together with CLSY2-4 as the master regulators of essentially all Pol-IV-dependent 24nt-siRNAs.;Involved in g…
TraesCS2A02G089600	C1	7.0972	1.26246	0.657332	1.70622	1.1225	AT5G01710	AT5G01710	methyltransferase;(source:Araport11)
TraesCS2A02G090200	C1	0.370344	0	0	0	0.257352	AT1G27730;AT5G04340;AT5G43170;AT5G67450	ZAT10;ZAT6;AZF3;AZF1	Related to Cys2/His2-type zinc-finger proteins found in higher plants. Compensated for a subset of calcineurin deficiency in yeast. Salt tolerance produced by ZAT10 appeared to be partially dependent on ENA1/PMR2, a P-type ATPase required for Li+ and Na+ efflux in yeast. The protein is localized to the nucleus, acts as a transcriptional repressor and is responsive to chitin oligomers. Also involv…
TraesCS2A02G090900	C1	0.582368	0	0	0.0283929	0.0587196	AT3G51680	SDR2A	NAD(P)-binding Rossmann-fold superfamily protein;(source:Araport11)
TraesCS2A02G091000	C1	1.27634	0.165141	0.886064	0.56862	0.546669	AT3G51680	SDR2A	NAD(P)-binding Rossmann-fold superfamily protein;(source:Araport11)
TraesCS2A02G091100	C1	5.92892	0.547006	0.757762	0.247349	0.2094	AT3G51680	SDR2A	NAD(P)-binding Rossmann-fold superfamily protein;(source:Araport11)
TraesCS2A02G092400	C1	2.45257	0.98468	0.717174	0.773741	0.712653	AT3G08840	AT3G08840	D-alanine-D-alanine ligase family;(source:Araport11)
TraesCS2A02G092700	C1	14.3565	3.58892	7.98223	2.74552	2.61436	AT5G25320	ACR2	ACT-like superfamily protein;(source:Araport11)
TraesCS2A02G094000	C1	14.9376	7.35234	9.1666	8.6602	7.08979	AT3G05670	AT3G05670	RING/U-box protein;(source:Araport11)
TraesCS2A02G095200	C1	6.85865	4.11485	4.24418	4.70945	5.49447	AT1G02650;AT2G47440;AT3G62570;AT4G02100	AT1G02650;AT2G47440;AT3G62570;AT4G02100	Tetratricopeptide repeat (TPR)-like superfamily protein;(source:Araport11);Tetratricopeptide repeat (TPR)-like superfamily protein;(source:Araport11);Tetratricopeptide repeat (TPR)-like superfamily protein;(source:Araport11);Heat shock protein DnaJ with tetratricopeptide repeat-containing protein;(source:Araport11)
TraesCS2A02G096400	C1	27.6637	2.73176	5.09651	7.18233	8.28112	NA	NA	NA
TraesCS2A02G096500	C1	14.2395	9.49055	3.32348	6.07779	4.53478	AT3G06560	PAPS3	Encodes a poly(A) polymerase. Located in the cytoplasm.
TraesCS2A02G096600	C1	7.95441	6.24327	5.99778	6.92046	7.31183	NA	NA	NA
TraesCS2A02G098200	C1	0.834914	0.140242	0.243593	0.161165	0.206794	NA	NA	NA
TraesCS2A02G098300	C1	8.32559	1.30831	1.0285	1.40924	1.04462	AT2G26980;AT5G21326	CIPK3;CIPK26	encodes a serine-threonine protein kinase whose expression increases in response to abscisic acid, cold, drought, high salt, and wounding conditions. The gene is expressed in developing seeds and seedlings. Lines carrying a T-DNA insertions have reduced germination efficiency and expression of cold, high-salt, and abscisic acid marker genes are altered, but not drought-response markers.;Ca2+regul…
TraesCS2A02G098700	C1	1.18314	1.12217	0.257829	1.06083	1.2626	NA	NA	NA
TraesCS2A02G098800	C1	18.6101	8.58363	11.224	13.4082	15.2794	NA	NA	NA
TraesCS2A02G098900	C1	0.998231	0.107861	0.0779485	0.282979	0.45717	NA	NA	NA
TraesCS2A02G099300	C1	0.577699	0.0779837	0	0.0291263	0.0258105	NA	NA	NA
TraesCS2A02G100300	C1	0.6513	0.0338766	0.0580614	0.054994	0	AT5G17720;AT5G17780	BDG5;AT5G17780	alpha/beta-Hydrolases superfamily protein;(source:Araport11);alpha/beta-Hydrolases superfamily protein;(source:Araport11)
TraesCS2A02G100400	C1	21.6467	1.4474	0.396773	0	0.0175101	AT5G19730	PME53	Pectin lyase-like superfamily protein;(source:Araport11)
TraesCS2A02G100900	C1	127.964	1.79912	6.86222	14.1208	19.405	AT1G08570;AT2G33270	ACHT4;ACHT3	Encodes a member of the thioredoxin family protein. Located in the chloroplast. Shows high activity towards the chloroplast 2-Cys peroxiredoxin A, and poor activity towards the chloroplast NADP-malate dehydrogenase. The mRNA is cell-to-cell mobile.;Encodes a member of the thioredoxin family protein. Located in the chloroplast.
TraesCS2A02G101700	C1	308.118	68.4105	87.2374	66.153	53.1669	AT2G39050	EULS3	Encodes a nucleocytoplasmic lectin that is capable of binding carbohydrates. It is involved in ABA mediated stomatal movement and increased expression is correlated with increased resistance to Pseudomonas syringae.
TraesCS2A02G101800	C1	0.674932	0.175443	0.016188	0	0.0150812	AT2G39050	EULS3	Encodes a nucleocytoplasmic lectin that is capable of binding carbohydrates. It is involved in ABA mediated stomatal movement and increased expression is correlated with increased resistance to Pseudomonas syringae.
TraesCS2A02G102600	C1	25.3979	19.5335	18.74	23.1442	11.9202	AT5G05170	CESA3	Encodes a cellulose synthase isomer. CESA3 mutants have cellulose defect in the primary cell wall. Multiple lines of evidence suggest that CESA3, along with CESA1 and CESA6 are present in the same plasma membrane complex for cellulose biosynthesis. As inferred from the null role of secondary wall-type CesAs, included in a set of five primary wall-type CesAs that may support trichome cell wall thi…
TraesCS2A02G104600	C1	46.5713	0.316811	0.517344	0.713206	0.96188	AT3G56410;AT5G05190	AT3G56410;EDR4	hypothetical protein (DUF3133);(source:Araport11);hypothetical protein (DUF3133);(source:Araport11)
TraesCS2A02G105100	C1	3.30324	2.95888	2.53567	2.24637	1.03695	NA	NA	NA
TraesCS2A02G105700	C1	14.6001	7.28615	10.1718	8.04989	6.89742	NA	NA	NA
TraesCS2A02G106000	C1	5.42751	0.0597477	0	0	0	NA	NA	NA
TraesCS2A02G106500	C1	3.35233	0.28562	0.969871	0.815126	1.22176	AT4G14580	CIPK4	CBL-interacting protein kinase
TraesCS2A02G106900	C1	4.75559	0.466227	0	0.463918	0.432877	NA	NA	NA
TraesCS2A02G108800	C1	2.19002	0.0612444	0	0.196429	0.0319586	NA	NA	NA
TraesCS2A02G109000	C1	4.46246	0	0	0	0.0578112	NA	NA	NA
TraesCS2A02G109100	C1	74.6334	3.8354	3.89356	1.03975	0.301023	NA	NA	NA
TraesCS2A02G109600	C1	10.6099	4.82072	0.515297	0.218079	0.429432	AT4G02300;AT4G02320	PME39;PME40	Plant invertase/pectin methylesterase inhibitor superfamily;(source:Araport11);Plant invertase/pectin methylesterase inhibitor superfamily;(source:Araport11)
TraesCS2A02G109800	C1	98.0871	8.02524	17.8414	37.3966	23.9837	AT2G47520	ERF071	encodes a member of the ERF (ethylene response factor) subfamily B-2 of ERF/AP2 transcription factor family. The protein contains one AP2 domain. There are 5 members in this subfamily including RAP2.2 AND RAP2.12. It plays a role in hypoxia-induced root slanting.
TraesCS2A02G111000	C1	145.903	62.5237	54.337	49.1742	41.2431	NA	NA	NA
TraesCS2A02G111300	C1	3.00595	0.429372	0.0402004	0	0.399518	NA	NA	NA
TraesCS2A02G113500	C1	88.5186	41.1108	33.8417	1.75482	0.34792	NA	NA	NA
TraesCS2A02G113700	C1	3.12601	0.685096	3.11586	0.128862	0.0346456	NA	NA	NA
TraesCS2A02G114000	C1	129.094	60.2189	40.706	14.2172	8.74323	NA	NA	NA
TraesCS2A02G120900	C1	15.8979	2.11338	1.9107	1.49774	1.25439	AT1G61940;AT2G47900	TULP4;AtTLP3	Member of TLP family;Member of plant TLP family which differs in having an F box domain. Plasma membrane tethering is mediated by PIP2 binding domain. Under abiotic stress TLP3 detaches from the PM and translocates to the nucleus. Mutants are insensitive to ABA.
TraesCS2A02G121900	C1	3.87455	4.12744	0	0	0	NA	NA	NA
TraesCS2A02G123800	C1	2.90092	1.6783	2.40203	3.36735	1.22588	AT2G40840	DPE2	Encodes a cytosolic protein with transglucosidase and amylomaltase activity. It is an essential component of the pathway from starch to sucrose and cellular metabolism in leaves at night. The protein binds to heteroglycans and utilizes glucose, mannose and xylose as acceptors. Fucose and galactose can also act as acceptors but less efficiently than the previous three. It was also was also recentl…
TraesCS2A02G126800	C1	4.73873	4.52345	3.76484	3.31068	3.17428	NA	NA	NA
TraesCS2A02G127100	C1	148.964	29.335	29.0294	38.3669	42.4532	NA	NA	NA
TraesCS2A02G127400	C1	0.84885	0	0	0	0.0457578	NA	NA	NA
TraesCS2A02G128500	C1	0.0712732	0.00590501	0	0.00715177	0.00649606	AT3G59140	ABCC10	member of MRP subfamily
TraesCS2A02G129600	C1	1.75689	0.21375	0	0.0630708	0.138909	AT4G18810	AT4G18810	NAD(P)-binding Rossmann-fold superfamily protein;(source:Araport11)
TraesCS2A02G130200	C1	46.0912	5.78637	9.22225	20.1349	13.2526	AT2G41250	AT2G41250	Haloacid dehalogenase-like hydrolase (HAD) superfamily protein;(source:Araport11)
TraesCS2A02G130900	C1	2.16179	0.37904	0.151776	0.078097	0.192176	AT3G54400;AT5G07030	AT3G54400;AT5G07030	Eukaryotic aspartyl protease family protein;(source:Araport11);Eukaryotic aspartyl protease family protein;(source:Araport11)
TraesCS2A02G132400	C1	4.07868	0.933392	1.12128	1.57886	1.44569	NA	NA	NA
TraesCS2A02G133900	C1	4.49714	0.297141	0.358206	0.635284	0.474153	AT5G13720	AT5G13720	Uncharacterized protein family (UPF0114);(source:Araport11)
TraesCS2A02G134000	C1	10.8348	1.43	0.595536	0.426273	0.910471	AT5G13630	CHLH	Encodes magnesium chelatase involved in plastid-to-nucleus signal transduction.
TraesCS2A02G134400	C1	4.36556	1.36408	0.970465	1.21601	0.886341	AT5G13760	AT5G13760	Plasma-membrane choline transporter family protein;(source:Araport11)
TraesCS2A02G136700	C1	3.93545	1.64846	1.48975	2.00847	2.6404	AT2G38000	AT2G38000	chaperone protein dnaJ-like protein;(source:Araport11)
TraesCS2A02G136800	C1	10.8524	5.8577	7.06191	8.88452	9.2542	AT2G38000	AT2G38000	chaperone protein dnaJ-like protein;(source:Araport11)
TraesCS2A02G139600	C1	2.26496	0	0.0142002	0.0728291	0.0264587	AT3G06260	GATL4	Encodes a protein with putative galacturonosyltransferase activity.
TraesCS2A02G142800	C1	25.1924	15.4022	13.4297	20.9628	17.4222	AT3G56660	BZIP49	basic region/leucine zipper motif protein 49;(source:Araport11)
TraesCS2A02G143300	C1	0.289913	0	0	0	0	AT5G23530	CXE18	carboxyesterase 18;(source:Araport11)
TraesCS2A02G144300	C1	0.822075	0.242072	0.314317	0.177286	0.295853	NA	NA	NA
TraesCS2A02G144400	C1	25.845	23.6886	17.2844	4.41194	3.81356	AT1G53590;AT3G14590	NTMC2T6.1;NTMC2TYPE6.2	Calcium-dependent lipid-binding (CaLB domain) family protein;(source:Araport11);Ca2+-dependent lipid-binding protein
TraesCS2A02G144800	C1	40.9912	20.4579	14.9159	16.1803	15.2251	NA	NA	NA
TraesCS2A02G145900	C1	2.48874	1.09566	0.374432	0.618503	1.39715	AT3G23400	PAP6	Encodes FIBRILLIN 4 (FIB4). The fibrillins are a large family of chloroplast proteins that have been linked with stress tolerance and disease resistance. FIBRILLIN 4 is required for plastoglobule development and stress resistance.Iinvolved in plastoquinone transport.
TraesCS2A02G146900	C1	145.08	134.525	135.472	111.063	118.882	AT3G12260	AT3G12260	LYR family of Fe/S cluster biogenesis protein;(source:Araport11)
TraesCS2A02G148200	C1	0.445778	0.0164793	0	0.380776	0.143844	NA	NA	NA
TraesCS2A02G149700	C1	14.3159	13.284	13.2305	13.5225	10.4533	AT1G48240;AT3G17440	NPSN12;NPSN13	member of NPSN Gene Family;member of NPSN Gene Family
TraesCS2A02G150000	C1	26.7719	5.4918	8.11456	16.3142	15.3612	AT3G06483	PDK	Pyruvate dehydrogenase kinase (PDK) specifically phosphorylates the E1&#945; subunit of the pyruvate dehydrogenase complex (PDC) on a Ser residue using ATP as a phosphate donor. PDK is a unique type of protein kinase having a His-kinase-like sequence but Ser-kinase activity. Site-directed mutagenesis and structural analysis indicate that PDK belongs to the GHKL superfamily.
TraesCS2A02G152000	C1	59.9949	5.14029	4.43957	35.6502	8.79995	AT3G05880;AT3G05890	RCI2A;RCI2B	Induced by low temperatures, dehydration and salt stress and ABA. Encodes a small (54 amino acids), highly hydrophobic protein that bears two potential transmembrane domains.;Low temperature and salt responsive protein family;(source:Araport11)
TraesCS2A02G152200	C1	27.8732	2.11957	1.84369	0.201083	0.30361	AT2G46950;AT2G46960;AT4G27710	CYP709B2;CYP709B1;CYP709B3	cytochrome P450, family 709, subfamily B, polypeptide 2;(source:Araport11);member of CYP709B;Encodes CYP709B3, a cytochrome P450 monooxygenase involved in salt tolerance. The mRNA is cell-to-cell mobile.
TraesCS2A02G152400	C1	67.5281	1.09737	0.219084	0.730005	0.781699	AT2G46950;AT2G46960;AT4G27710	CYP709B2;CYP709B1;CYP709B3	cytochrome P450, family 709, subfamily B, polypeptide 2;(source:Araport11);member of CYP709B;Encodes CYP709B3, a cytochrome P450 monooxygenase involved in salt tolerance. The mRNA is cell-to-cell mobile.
TraesCS2A02G152500	C1	14.8561	0.0466245	0	0	0.111673	AT2G46950;AT2G46960;AT4G27710	CYP709B2;CYP709B1;CYP709B3	cytochrome P450, family 709, subfamily B, polypeptide 2;(source:Araport11);member of CYP709B;Encodes CYP709B3, a cytochrome P450 monooxygenase involved in salt tolerance. The mRNA is cell-to-cell mobile.
TraesCS2A02G154900	C1	17.2089	3.81423	14.7026	4.086	3.92221	AT3G13600;AT3G58480	IQM2;IQM6	calmodulin-binding family protein;(source:Araport11);calmodulin-binding family protein;(source:Araport11)
TraesCS2A02G155300	C1	5.04039	1.48881	1.3772	1.99537	1.82263	NA	NA	NA
TraesCS2A02G155500	C1	7.61151	5.46374	5.29228	6.39602	3.75174	AT1G14000	VIK	Encodes a protein with similarity to members of the C1 subgroup of MAP kinase kinase kinases. Interacts physically with the receptor kinase BRL2/VH1 and appears to be involved in auxin and brassinosteriod signaling. The mRNA is cell-to-cell mobile.
TraesCS2A02G156400	C1	17.9901	2.0457	3.15746	9.18601	9.32139	NA	NA	NA
TraesCS2A02G156800	C1	258.83	3.7737	1.13634	9.52361	6.29583	AT1G26800	MPSR1	MPSR1 is cytoplasmic E3 ligase that senses misfolded proteins independently of chaperones and targets those proteins for degradation via the 26S proteasome. Involved in the regulation of the homeostasis of sensor NLR immune receptors.
TraesCS2A02G157600	C1	49.0462	10.3849	9.22079	16.1976	17.3347	AT1G74650;AT3G28910;AT3G47600;AT5G62470	ATY13;MYB30;MYB94;MYB96	Member of the R2R3 factor gene family.;Encodes a MYB family transcriptional regulator.It is a a positive regulator of the pathogen-induced hypersensitive response and of brassinosteroid and abscisic acid signaling and a negative regulator of photomorphogenesis. Accumulation of MYB30 is light regulated and activity is modulated by SUMOlaytion. MYB30 can for complexes with different bHLH components…
TraesCS2A02G157800	C1	19.0478	9.33195	11.9217	11.1062	6.91867	NA	NA	NA
TraesCS2A02G158200	C1	0.473076	0.161411	0.0177606	0.107491	0.18656	NA	NA	NA
TraesCS2A02G159100	C1	1.78116	0.517114	1.22416	0.965196	1.63632	NA	NA	NA
TraesCS2A02G159300	C1	6.56193	2.3782	4.17979	4.58537	3.48175	AT5G64860	DPE1	Encodes a maltotriose-metabolizing enzyme with chloroplastic &#945;-1,4-glucanotransferase activity. Mutant has altered starch degradation.
TraesCS2A02G160700	C1	4.73652	0.531115	1.36441	0.923053	3.71174	AT4G39700	HIPP23	Heavy metal transport/detoxification superfamily protein;(source:Araport11)
TraesCS2A02G161200	C1	2.89479	0.768139	1.37925	0.644645	0.885882	AT1G22210;AT1G35910;AT1G78090	TPPC;TPPD;TPPB	Haloacid dehalogenase-like hydrolase (HAD) superfamily protein;(source:Araport11);Haloacid dehalogenase-like hydrolase (HAD) superfamily protein;(source:Araport11);homologous to the C-terminal part of microbial trehalose-6-phosphate phosphatases
TraesCS2A02G161300	C1	45.1304	31.5893	25.4541	22.925	11.4048	NA	NA	NA
TraesCS2A02G161700	C1	19.655	5.64542	2.83982	9.38996	4.60456	AT3G22800	LRX6	Leucine-rich repeat (LRR) family protein;(source:Araport11)
TraesCS2A02G162100	C1	79.7671	34.6916	36.2248	36.7507	33.972	NA	NA	NA
TraesCS2A02G163000	C1	29.6504	11.343	12.8008	14.8908	13.1271	AT2G22300;AT5G09410;AT5G64220	CAMTA3;EICBP.B;CAMTA2	Encodes a putative CAM binding transcription factor. Loss of function mutations show enhanced resistance to fungal and bacterial pathogens suggesting that CAMTA functions to suppress defense responses.It acts in the cold response pathway, it can bind to and activate the expression of DREB1 genes.;calmodulin-binding protein, similar to another ethylene-upregulated calmodulin-binding protein ER1 GI…
TraesCS2A02G163200	C1	10.6979	7.07363	3.20294	4.6594	3.25218	AT1G34640	AT1G34640	peptidase;(source:Araport11)
TraesCS2A02G164600	C1	27.1752	2.44679	1.6087	5.65005	4.20669	NA	NA	NA
TraesCS2A02G166000	C1	1.87393	1.02138	1.05181	0.623291	1.04006	NA	NA	NA
TraesCS2A02G166600	C1	2.72078	0.0628376	0.170214	0.440635	0.705028	NA	NA	NA
TraesCS2A02G166900	C1	3.8069	2.11083	0.440703	0.164607	0.368204	AT1G53730;AT3G14350	SRF6;SRF7	STRUBBELIG-receptor family 6;(source:Araport11);STRUBBELIG-receptor family 7;(source:Araport11)
TraesCS2A02G168200	C1	925.585	132.957	75.9302	12.8424	9.22126	AT3G43190;AT5G20830	SUS4;SUS1	Encodes a protein with sucrose synthase activity (SUS4).;Encodes a protein with sucrose synthase activity (SUS1).
TraesCS2A02G168500	C1	19.4404	13.8115	15.7003	12.7611	9.96071	AT1G74960	KAS2	Encodes a plastidic beta-ketoacyl-ACP synthase II, involved in fatty acid elongation from 16:0-ACP to 18:0-ACP. Homozygous knock-out mutants are embryo lethal, indicating early embryo development is sensitive to elevated 16:0.
TraesCS2A02G168600	C1	12.2856	5.85794	7.64818	8.53951	6.60446	AT1G17360;AT1G72410;AT3G14172	AT1G17360;AT1G72410;AT3G14172	LOW protein: protein phosphatase 1 regulatory subunit-like protein;(source:Araport11);COP1-interacting protein-like protein;(source:Araport11);GPI-anchored adhesin-like protein;(source:Araport11)
TraesCS2A02G169300	C1	73.5079	43.138	18.6753	31.8094	26.3363	NA	NA	NA
TraesCS2A02G170300	C1	0.161575	0	0	0	0	NA	NA	NA
TraesCS2A02G170400	C1	27.2142	1.87005	0.630655	1.32164	2.58868	NA	NA	NA
TraesCS2A02G170500	C1	0.72628	0.379526	0.128602	0	0.0174498	NA	NA	NA
TraesCS2A02G171000	C1	1.33013	0.0929109	0	0	0.0976694	AT4G33180;AT5G21950	AT4G33180;AT5G21950	alpha/beta-Hydrolases superfamily protein;(source:Araport11);alpha/beta-Hydrolases superfamily protein;(source:Araport11)
TraesCS2A02G171500	C1	8.95668	6.33305	6.76769	5.2281	5.25899	AT4G34360	AT4G34360	S-adenosyl-L-methionine-dependent methyltransferases superfamily protein;(source:Araport11)
TraesCS2A02G171600	C1	19.0434	16.7624	13.1595	16.116	14.8269	NA	NA	NA
TraesCS2A02G172500	C1	54.9201	7.6006	2.34124	6.2141	7.27784	AT1G17590;AT1G54160;AT1G72830;AT3G14020	NFYA8;NFYA5;HAP2C;NFYA6	Binds directly to CCAAT cis-elements in the promoters of multiple MIR156 genes and inhibits the juvenile-to adult transition by activating transcription of these MIR156s.;Encodes a member of the CCAAT-binding transcription factor (CBF-B/NF-YA) family. Expression is upregulated in response to ABA and drought. This regulation appears to be mediated by MIR169A which is downregulated in response to d…
TraesCS2A02G173100	C1	4.78113	2.01558	2.42299	4.06583	2.79804	NA	NA	NA
TraesCS2A02G173400	C1	1.11665	0.872705	0.165067	0.411575	0.841824	NA	NA	NA
TraesCS2A02G173500	C1	2.22979	0.265592	0.227292	0.48158	0.637498	AT5G47640	NFYB2	Involved in the regulation of response to nutrient levels.
TraesCS2A02G174000	C1	31.9114	0.708604	1.56408	0.945554	0.746186	NA	NA	NA
TraesCS2A02G174800	C1	1.75298	0.850953	1.03307	0.386399	0.417125	AT1G20350;AT2G37410;AT5G11690	TIM17-1;TIM17-2;TIM17-3	mitochondrial inner membrane translocase;Mitochondrial inner membrane translocase. Together with AtTIM17-1, TIM17-2 has a long C-terminal extension not present in other TIMs. The extension is located in the outer membrane and so TIM17-2 links the inner and outer mitochondrial membranes. The C-terminal region is essential for protein import into mitochondria via the general import pathway but is n…
TraesCS2A02G177000	C1	43.9535	42.6509	34.7932	21.527	19.4686	AT1G69800	AT1G69800	Cystathionine beta-synthase (CBS) protein;(source:Araport11)
TraesCS2A02G177300	C1	24.0656	3.46136	1.97441	1.4092	0.388282	AT1G13820;AT5G39220	AT1G13820;AT5G39220	alpha/beta-Hydrolases superfamily protein;(source:Araport11);alpha/beta-Hydrolases superfamily protein;(source:Araport11)
TraesCS2A02G182200	C1	10.5602	5.22691	4.0695	4.95465	6.57541	AT2G16390;AT3G31900;AT3G32280;AT3G32330	DRD1;AT3G31900;AT3G32280;AT3G32330	Putative chromatin remodeling protein, member of a plant-specific subfamily of SWI2/SNF2-like proteins. Mutations nearly eliminate non-CpG methylation at a target promoter but do not affect rDNA or centromere methylation. Cooperates with PolIVb to facilitate RNA-directed de novo methylation and silencing of homologous DNA. Endogenous targets include intergenic regions near retrotransposon LTRs or…
TraesCS2A02G183200	C1	13.5595	9.06691	6.9215	6.5355	6.62696	AT1G69420	PAT22	DHHC-type zinc finger family protein;(source:Araport11)
TraesCS2A02G183600	C1	23.3807	19.7309	16.7237	15.9192	15.2922	NA	NA	NA
TraesCS2A02G184300	C1	0.985189	0.159608	0	0.518232	0.233461	NA	NA	NA
TraesCS2A02G187200	C1	0.319891	0	0.0267109	0.168489	0.0255068	AT3G61470	LHCA2	Encodes a component of the light harvesting antenna complex of photosystem I. The mRNA is cell-to-cell mobile.
TraesCS2A02G187400	C1	41.6793	15.5882	24.4135	3.61699	1.01392	AT3G54940	RD19D	Papain family cysteine protease;(source:Araport11)
TraesCS2A02G189100	C1	4.43974	0.879628	2.03649	0.879879	0.990952	AT2G16120;AT2G16130;AT3G18830	PLT1;PLT2;PLT5	polyol/monosaccharide transporter 1;(source:Araport11);polyol/monosaccharide transporter 2;(source:Araport11);This gene encodes a plasma membrane-localized polyol/cyclitol/monosaccharide-H+-symporter. The symporter is able to catalyze the energy-dependent membrane passage of a wide range of linear polyols (three to six carbon backbone), of cyclic polyols (<i>myo</i>-inositol), and of numerous mon…
TraesCS2A02G189600	C1	126.017	2.5031	4.62638	3.77604	5.76983	AT1G50600	SCL5	Encodes a scarecrow-like protein (SCL5). Member of GRAS gene family.
TraesCS2A02G189700	C1	14.7881	9.72688	12.0613	12.5988	11.0648	AT4G26640	WRKY20	member of WRKY Transcription Factor; Group I
TraesCS2A02G190200	C1	2.77191	0.137602	0.391592	0.809231	0.689539	AT5G55560	WNK11	Protein kinase superfamily protein;(source:Araport11)
TraesCS2A02G190700	C1	30.3942	3.2408	0.883145	0.844342	0.512256	AT2G24270	ALDH11A3	Encodes a protein with non-phosphorylating NADP-dependent glyceraldehyde-3-phosphate dehydrogenase activity. The activity of the enzyme was determined from leaf extracts; the enzyme has not been purified to confirm activity.
TraesCS2A02G190800	C1	14.354	6.30672	5.38481	5.35983	6.72181	AT4G16490	AT4G16490	ARM repeat superfamily protein;(source:Araport11)
TraesCS2A02G191000	C1	17.2385	16.4069	16.7934	18.1609	12.2278	AT2G03410;AT4G17270;AT5G47540	AT2G03410;AT4G17270;AT5G47540	Mo25 family protein;(source:Araport11);Putative MO25-like protein; commonly-enriched candidate LPS-interacting PM-associated proteins from the three affinity chromatography systems with LPS chemotype Xcc 8530 as ligand.;Mo25 family protein;(source:Araport11)
TraesCS2A02G191400	C1	59.6624	25.908	8.60741	0.352426	0.248595	NA	NA	NA
TraesCS2A02G193000	C1	11.6411	4.55487	5.58955	3.68306	4.63037	AT3G01400;AT5G58680	AT3G01400;AT5G58680	ARM repeat superfamily protein;(source:Araport11);ARM repeat superfamily protein;(source:Araport11)
TraesCS2A02G194500	C1	17.9777	15.5455	11.5375	13.2763	16.2016	AT3G49940;AT4G37540;AT5G67420	LBD38;LBD39;LBD37	LOB domain-containing protein 38;(source:Araport11);LOB domain-containing protein 39;(source:Araport11);Encodes a LOB-domain protein involved in nitrogen metabolism and affecting leaf morphogenesis.
TraesCS2A02G195300	C1	0.939173	0.1118	0	0.244185	0	NA	NA	NA
TraesCS2A02G195600	C1	2.67872	1.87846	0.293471	0.384487	0.511998	NA	NA	NA
TraesCS2A02G196100	C1	1.36731	0.648596	0.213777	0.722646	0.299791	NA	NA	NA
TraesCS2A02G196200	C1	2.89218	2.94049	1.93593	2.80634	2.92388	AT3G04860;AT5G28150	AT3G04860;AT5G28150	hypothetical protein (DUF868);(source:Araport11);hypothetical protein (DUF868);(source:Araport11)
TraesCS2A02G196400	C1	43.0666	0.868331	0.550665	2.29828	5.11892	AT2G37040;AT3G10340;AT3G53260;AT5G04230	PAL1;PAL4;PAL2;PAL3	Encodes PAL1, a phenylalanine ammonia-lyase. Arabidopsis has four PALs: AT2G37040 (PAL1), AT3G53260 (PAL2), AT5G04230 (PAL3) and AT3G10340 (PAL4).;Encodes PAL4, a putative a phenylalanine ammonia-lyase. Arabidopsis has four PALs: AT2G37040 (PAL1), AT3G53260 (PAL2), AT5G04230 (PAL3) and AT3G10340 (PAL4).;Encodes phenylalanine lyase. Arabidopsis has four PALs: AT2G37040 (PAL1), AT3G53260 (PAL2), AT…
TraesCS2A02G196700	C1	26.7399	2.40029	2.30963	5.43656	7.81468	AT2G37040;AT3G10340;AT3G53260;AT5G04230	PAL1;PAL4;PAL2;PAL3	Encodes PAL1, a phenylalanine ammonia-lyase. Arabidopsis has four PALs: AT2G37040 (PAL1), AT3G53260 (PAL2), AT5G04230 (PAL3) and AT3G10340 (PAL4).;Encodes PAL4, a putative a phenylalanine ammonia-lyase. Arabidopsis has four PALs: AT2G37040 (PAL1), AT3G53260 (PAL2), AT5G04230 (PAL3) and AT3G10340 (PAL4).;Encodes phenylalanine lyase. Arabidopsis has four PALs: AT2G37040 (PAL1), AT3G53260 (PAL2), AT…
TraesCS2A02G197600	C1	13.1967	4.58524	5.45665	4.28818	4.12493	AT3G63170	FAP1	Encodes a plastid stroma localized fatty acid binding protein involved in fatty acid metabolism.
TraesCS2A02G199300	C1	3.05051	0.118213	1.05033	1.91093	2.18654	AT2G41870;AT3G57540	REM4.2;REM4.1	Remorin family protein;(source:Araport11);Remorin family protein;(source:Araport11)
TraesCS2A02G199700	C1	32.5026	14.9939	15.1272	13.9714	11.3953	AT2G41860;AT3G57530;AT5G12480;AT5G19450	CPK14;CPK32;CPK7;CPK8	member of Calcium Dependent Protein Kinase;Calcium-dependent Protein Kinase. ABA signaling component that regulates the ABA-responsive gene expression via ABF4. AtCPK32 has autophosphorylation activity and can phosphorylate ABF4 in vitro;calmodulin-domain protein kinase CDPK isoform 7 (CPK7);calcium-dependent protein kinase (CDPK19) mRNA, complete
TraesCS2A02G199800	C1	2.67479	0.354777	0.556988	1.08967	0.495171	NA	NA	NA
TraesCS2A02G200800	C1	5.35243	4.11142	3.6115	3.6591	4.14719	AT1G31175	AT1G31175	cytochrome C oxidase biogenesis Cmc1-like protein;(source:Araport11)
TraesCS2A02G201400	C1	2.64495	0.405998	0.351825	0.537569	0.074525	NA	NA	NA
TraesCS2A02G202100	C1	1.01368	0.60421	0	1.58901	0	NA	NA	NA
TraesCS2A02G202300	C1	0.227062	0.120962	0.0177439	0.187024	0.21034	AT3G15520	CYP37	Cyclophilin-like peptidyl-prolyl cis-trans isomerase family protein;(source:Araport11)
TraesCS2A02G203200	C1	0.22147	0.0131854	0	0.0745465	0.0814723	NA	NA	NA
TraesCS2A02G203900	C1	35.8386	3.75923	8.39471	7.32977	5.96983	NA	NA	NA
TraesCS2A02G204500	C1	3.27837	0.236346	0.55013	0.129559	0.374807	NA	NA	NA
TraesCS2A02G204900	C1	0.658194	0.22491	0.0160066	0.134801	0.0317285	AT1G16370;AT1G16390;AT1G79360;AT1G79410	6-Oct;3-Oct;2-Oct;5-Oct	organic cation/carnitine transporter 6;(source:Araport11);organic cation/carnitine transporter 3;(source:Araport11);organic cation/carnitine transporter 2;(source:Araport11);organic cation/carnitine transporter5;(source:Araport11)
TraesCS2A02G205100	C1	101.417	3.58371	16.9679	8.65476	9.07953	NA	NA	NA
TraesCS2A02G205500	C1	30.4018	0.850445	0.481928	0.961353	1.21273	AT1G11260;AT4G21480	STP1;STP12	Encodes a H+/hexose cotransporter. The mRNA is cell-to-cell mobile.;Putative sugar transporter. Expressed in nematode-induced root syncytia.
TraesCS2A02G209700	C1	1.99754	0	0	0	0.0613775	NA	NA	NA
TraesCS2A02G211100	C1	37.5852	29.5207	27.5424	31.5011	34.1784	NA	NA	NA
TraesCS2A02G211300	C1	0.592572	0.0355131	0	0.22976	0.282135	AT1G11300;AT1G11303;AT1G11330;AT1G11350	AT1G11300;AT1G11303;AT1G11330;SD113	The annotation for At1g11300 in TAIR10 is incorrect. This locus has been split into two At1g11300 (symbol: EGM1) and At1g11305 (symbol: EGM2) (Olivier Loudet, personal communication, 2013-04-03). See Comment field for revised annotation.;G-type lectin S-receptor-like Serine/Threonine-kinase;(source:Araport11);S-locus lectin protein kinase family protein;(source:Araport11);S-domain-1 13;(source:Ar…
TraesCS2A02G211400	C1	6.04668	1.43703	0.941445	1.52591	2.53845	NA	NA	NA
TraesCS2A02G213400	C1	3.43714	0.143574	0.305171	0.47364	0.646967	NA	NA	NA
TraesCS2A02G214400	C1	89.2025	18.7567	14.7476	8.29605	6.5995	AT2G04890;AT5G48150	SCL21;PAT1	Encodes a scarecrow-like protein (SCL21). Member of GRAS gene family.;Member of GRAS gene family. Semi-dominant mutant has a reduced response to far-red light and appears to act early in the phytochrome A signaling pathway.
TraesCS2A02G214800	C1	2.19559	0.127044	0	0	0.0319674	AT1G11500;AT2G32280;AT4G21310	AT1G11500;AT2G32280;AT4G21310	DUF1218 family member.;Encodes a member of a plant-specific gene family that is required for embryo provasculature development. The gene product regulates vascular network complexity and connectivity in cotyledons.;DUF1218 family member.
TraesCS2A02G218600	C1	2.31978	1.43722	1.35904	1.51215	1.27344	AT3G01200;AT4G21210	RP2;RP1	Encodes a PPDK regulatory protein that has protein kinase activity but lacks protein phosphatase activity towards PPDK (pyruvate orthophosphate dikinase).;Encodes a PPDK regulatory protein that has both protein kinase and protein phosphatase activities towards PPDK (pyruvate orthophosphate dikinase).
TraesCS2A02G218700	C1	52.9963	15.5635	0.768594	11.1353	10.9619	NA	NA	NA
TraesCS2A02G219300	C1	0.94652	0.990375	0.614788	0.733715	0.993409	NA	NA	NA
TraesCS2A02G220400	C1	54.8177	42.032	26.9347	31.2263	22.4174	NA	NA	NA
TraesCS2A02G220500	C1	31.3119	0	0.458879	0.60764	0.868528	NA	NA	NA
TraesCS2A02G221000	C1	7.01135	2.04561	1.93733	2.90698	4.76103	AT1G50900	LTD	Encodes GDC1 (Grana Deficient Chloroplast 1), an ankyrin domain containing protein required fro chloroplast thylakoid grana formation. The mRNA is cell-to-cell mobile.
TraesCS2A02G222300	C1	1.28163	0.130452	0.0662093	0.0700923	0.0249064	AT1G11670;AT1G61890;AT4G21903;AT4G21910	DTX36;DTX37;AT4G21903;AT4G21910	MATE efflux family protein;(source:Araport11);MATE efflux family protein;(source:Araport11);MATE efflux family protein;(source:Araport11);MATE efflux family protein;(source:Araport11)
TraesCS2A02G222500	C1	24.7675	2.57982	0.844089	2.28536	3.04816	NA	NA	NA
TraesCS2A02G222600	C1	86.8005	66.0585	61.9469	62.61	58.1775	AT3G20390	AT3G20390	Encodes a plastidial RidA (Reactive Intermediate Deaminase A) homolog that hydrolyzes the enamines/imines formed by Thr dehydratase from Ser or Thr. RidA accelerates the deamination of reactive enamine/imine intermediates produced by threonine dehydratase (At3g10050) with threonine or serine as substrates. In the absence of RidA, the serine-derived imine inactivates BCAT3 (At3g49680). RidA thus p…
TraesCS2A02G223000	C1	17.2322	9.15447	11.0821	15.8708	14.7121	NA	NA	NA
TraesCS2A02G225500	C1	0.847487	0.538005	0.555938	0.326804	0.957143	NA	NA	NA
TraesCS2A02G226800	C1	1.1361	0.03609	0.274075	0.712817	0.85619	AT3G60370	AT3G60370	Encodes an immunophilin, FKBP20-2, that belongs to the FK-506 binding protein (FKBP) subfamily functioning as peptidyl-prolyl isomerases (PPIases) in protein folding. FKBP20-2 has a unique pair of cysteines at the C terminus and was found to be reduced by thioredoxin (Trx) (itself reduced by NADPH by means of NADP-Trx reductase). The FKBP20-2 protein, which contains only two of the five amino aci…
TraesCS2A02G229100	C1	24.5496	10.3328	10.0461	7.87532	4.66696	AT1G23140;AT1G48590;AT1G66360;AT1G70790;AT1G70800;AT1G70810;AT1G73580;AT2G01540;AT3G17980;AT5G37740	CAR8;CAR5;CAR2;CAR9;CAR6;CAR7;CAR3;CAR10;CAR4;AT5G37740	Expression is upregulated in the shoot of cax1/cax3 mutant.;Calcium-dependent lipid-binding (CaLB domain) family protein;(source:Araport11);Calcium-dependent lipid-binding (CaLB domain) family protein;(source:Araport11);C2-domain ABA-related (CAR) protein, involved in the recruitment of ABA receptors to the plasma membrane to facilitate ABA signaling. Its stability and dynamic localization is reg…
TraesCS2A02G229300	C1	12.0289	6.93737	8.75723	9.83075	9.92929	AT1G28340	AtRLP4	receptor like protein 4;(source:Araport11)
TraesCS2A02G230200	C1	35.1237	24.4133	31.6319	30.8415	26.2167	AT4G20150	AT4G20150	excitatory amino acid transporter;(source:Araport11)
TraesCS2A02G238000	C1	1.57094	0.763459	0.491867	1.12733	1.05079	AT2G32040	AT2G32040	The At2g32040 gene product has been demonstrated to mediate folate monoglutamate transport involved in tetrahydrofolate biosynthesis. It also mediates transport of antifolates, such as methotrexate and aminopterin. The gene is expressed in both chloroplast and non-green plastids.
TraesCS2A02G240200	C1	44.491	21.224	19.3876	19.2068	16.8882	AT3G22960	PKP1	encodes a chloroplast pyruvate kinase alpha subunit. Important for seed oil biosynthesis. Ubiquitously expressed, with significantly increased expression in maturing seeds. The mRNA is cell-to-cell mobile.
TraesCS2A02G242900	C1	6.58173	6.17385	6.09222	6.04078	4.96675	AT2G39170	AT2G39170	MEF2BNB-like protein;(source:Araport11)
TraesCS2A02G243200	C1	166.523	105.348	82.1917	87.591	80.7506	AT1G19730;AT3G51030	TRX4;TRX1	encodes a cytosolic thioredoxin that reduces disulfide bridges of target proteins by the reversible formation of a disulfide bridge between two neighboring Cys residues present in the active site. Thioredoxins have been found to regulate a variety of biological reactions in prokaryotic and eukaryotic cells.;encodes a cytosolic thioredoxin that reduces disulfide bridges of target proteins by the r…
TraesCS2A02G246400	C1	43.4495	26.3911	30.1778	34.5729	17.9448	NA	NA	NA
TraesCS2A02G247100	C1	2.95647	0.695531	1.64977	0.0354273	0.0627884	AT5G06570	AT5G06570	alpha/beta-Hydrolases superfamily protein;(source:Araport11)
TraesCS2A02G247300	C1	1.13505	0.0152221	0.0369447	0.0680262	0.944666	AT3G50820;AT5G66570	PSBO2;PSBO1	Encodes a protein which is an extrinsic subunit of photosystem II and which has been proposed to play a central role in stabilization of the catalytic manganese cluster. In <i>Arabidopsis thaliana</i> the PsbO proteins are encoded by two genes: <i>psbO1</i> and <i>psbO2</i>. PsbO2 is the minor isoform in the wild-type. Mutants defective in this gene have been shown to be affected in the dephospho…
TraesCS2A02G248600	C1	2.31379	0.130226	0.197061	0.377409	1.05761	NA	NA	NA
TraesCS2A02G248800	C1	17.2258	9.24844	6.68317	9.30586	5.90157	AT2G35860;AT3G11700;AT3G52370;AT5G05650;AT5G06390	FLA16;FLA18;FLA15;AT5G05650;FLA17	Fasciclin-like arabinogalactan protein. Possibly involved in embryogenesis and seed development.;Fasciclin-like arabinogalactan protein. Possibly involved in embryogenesis and seed development.;Fasciclin-like arabinogalactan protein. Possibly involved in embryogenesis and seed development.;fasciclin-like arabinogalactan protein 17 precursor;(source:Araport11);FASCICLIN-like arabinogalactan protei…
TraesCS2A02G249900	C1	14.0507	7.96545	7.44515	9.69162	9.72175	AT5G67290	AT5G67290	FAD-dependent oxidoreductase family protein;(source:Araport11)
TraesCS2A02G250800	C1	0.759838	0.0748432	0.138123	0.189685	0.266113	AT3G14415;AT3G14420;AT4G18360	AT3G14415;GLO1;GLO5	Encodes a glycolate oxidase that modulates reactive oxygen species-mediated signal transduction during nonhost resistance. The mRNA is cell-to-cell mobile.;Encodes a glycolate oxidase that modulates reactive oxygen species-mediated signal transduction during nonhost resistance. The mRNA is cell-to-cell mobile.;Encodes a glycolate oxidase that modulates reactive oxygen species-mediated signal tran…
TraesCS2A02G251000	C1	2.22988	1.08181	1.11288	0.769891	1.0256	AT5G63930	AT5G63930	Leucine-rich repeat protein kinase family protein;(source:Araport11)
TraesCS2A02G251800	C1	32.4171	25.599	14.6295	14.2299	11.1351	AT1G30270	CIPK23	Arabidopsis thaliana CBL-interacting protein kinase 23. CIPK23 serves as a positive regulator of the potassium transporter AKT1 by directly phosphorylating AKT1. CIPK23 is activated by the binding of two calcineurin B-like proteins, CBL1 and CBL9 and expression during hypoxia is also regulated by STOP1.CIPK23 also functions in phot1/2 mediated stomatal movement in response to blue light.The mRNA …
TraesCS2A02G251900	C1	17.049	8.5403	11.6061	13.0549	15.3165	AT1G17210	ATILP1	IAP-like protein 1;(source:Araport11)
TraesCS2A02G252800	C1	21.527	13.3452	12.0989	11.6981	8.25846	AT1G30510;AT4G05390	RFNR2;RFNR1	Encodes a root-type ferredoxin:NADP(H) oxidoreductase.;Encodes a root-type ferredoxin:NADP(H) oxidoreductase.
TraesCS2A02G253000	C1	1.26161	1.1414	0.889989	0.951918	0.788999	AT1G30540	AT1G30540	Actin-like ATPase superfamily protein;(source:Araport11)
TraesCS2A02G253200	C1	1.31311	0.781404	0.668542	0.734004	0.758205	AT1G30570	HERK2	Encodes HERCULES2 (HERK2), a receptor kinase regulated by Brassinosteroids and required for cell elongation during vegetative growth.
TraesCS2A02G254100	C1	1.47559	1.32949	1.49385	1.1594	0.865378	AT1G06690	AT1G06690	NAD(P)-linked oxidoreductase superfamily protein;(source:Araport11)
TraesCS2A02G254200	C1	0.869028	0.0502284	0	0.0190941	0	AT1G06690	AT1G06690	NAD(P)-linked oxidoreductase superfamily protein;(source:Araport11)
TraesCS2A02G254600	C1	4.96937	0.0742721	0.0824624	0.0845492	0.958678	AT1G06680;AT2G30790	PSBP1;PSBP2	Encodes a 23 kD extrinsic protein that is part of photosystem II and participates in the regulation of oxygen evolution. Phosphorylation of this protein is dependent on calcium. In plsp1-1 mutant plastids, the nonmature form of the protein localizes in the stroma. The mRNA is cell-to-cell mobile.;Encodes a 23 kD extrinsic protein that is part of photosystem II and participates in the regulation o…
TraesCS2A02G255600	C1	1.64184	0.13338	0	0	0	NA	NA	NA
TraesCS2A02G256400	C1	22.0808	14.516	13.7534	17.9872	15.776	NA	NA	NA
TraesCS2A02G259900	C1	5.21579	4.29028	0.357163	1.3674	3.15278	AT1G65870;AT3G13662	DIR21;DIR8	Disease resistance-responsive (dirigent-like protein) family protein;(source:Araport11);Disease resistance-responsive (dirigent-like protein) family protein;(source:Araport11)
TraesCS2A02G260600	C1	7.33406	2.81451	2.77152	2.26797	1.79294	AT1G69270;AT3G02130	RPK1;RPK2	RPK1 is a leucine-rich receptor-like kinase located in the plasma membrane which is upregulated by abscisic acid, dehydration, high salt, low temperature, but not by other plant hormones. RPK1 knock-out and antisense plants show an ABA-insensitive phenotype. RPK1 plays a role in ABA-controlled cell proliferation and is a regulator of the ABA signal transduction pathway. Overexpression of the LRR …
TraesCS2A02G261000	C1	12.4007	9.84898	10.9362	11.6009	8.73886	AT1G18620;AT1G74160;AT3G02170;AT5G15580	AT1G18620;AT1G74160;LNG2;LNG1	Member of a small gene family in Arabidopsis. Quadruple mutants in this family display defects in cell elongation.;Member of a small gene family in Arabidopsis. Quadruple mutants in this family display defects in cell elongation.;Encodes LONGIFOLIA2 (LNG2). Regulates leaf morphology by promoting cell expansion in the leaf-length direction. The LNG2 homologue LNG1 (At5g15580) has similar function.…
TraesCS2A02G261700	C1	1.01348	0.731573	0.84669	0.785298	0.601248	AT3G23550;AT3G23560	DTX18;DTX19	MATE efflux family protein;(source:Araport11);Member of the multidrug and toxic compound extrusion (MATE) family, protects roots from inhibitory compounds.
TraesCS2A02G265000	C1	3.75071	2.59458	1.89629	2.64924	2.42564	NA	NA	NA
TraesCS2A02G265300	C1	0.612768	0	0	0	0.074949	NA	NA	NA
TraesCS2A02G265400	C1	2.20653	0.896662	1.05327	0.814385	0.667968	NA	NA	NA
TraesCS2A02G265800	C1	0.597024	0.0996441	0.101655	0.21092	0.128041	NA	NA	NA
TraesCS2A02G267200	C1	5.88124	1.15452	1.16808	0.117143	0	NA	NA	NA
TraesCS2A02G271300	C1	48.5494	28.7475	17.2758	26.2794	22.8946	AT1G67100;AT1G68510	LBD40;LBD42	LOB domain-containing protein 40;(source:Araport11);LOB domain protein.
TraesCS2A02G271400	C1	1.20284	0.30742	0.575571	0.496712	0.0783718	NA	NA	NA
TraesCS2A02G271700	C1	46.2511	0.189972	0.0762859	0.618001	1.33145	AT4G29930	BHLH27	basic helix-loop-helix (bHLH) DNA-binding superfamily protein;(source:Araport11)
TraesCS2A02G271800	C1	9.9265	3.41493	1.64745	1.66452	1.41538	NA	NA	NA
TraesCS2A02G271900	C1	0.285816	0.0112248	0.0136215	0	0.170839	NA	NA	NA
TraesCS2A02G276000	C1	1.54353	0.240633	0.569531	0.904436	0.760142	NA	NA	NA
TraesCS2A02G277100	C1	409.878	4.86568	0.29743	8.01431	2.85872	AT3G25230;AT5G48570	ROF1;FKBP65	Encodes a a high molecular weight member of the FK506 binding protein (FKBP) family. It has three FKBP12-like domains, tetratricopeptide repeats, and a putative calmodulin binding domain. Modulates thermotolerance by interacting with HSP90.1 and affecting the accumulation of HsfA2-regulated sHSPs. Belongs to one of the 36 carboxylate clamp (CC)-tetratricopeptide repeat (TPR) proteins (Prasad 2010…
TraesCS2A02G277900	C1	129.258	12.129	5.38754	5.78594	4.94092	AT4G13010	CEQORH	Oxidoreductase, zinc-binding dehydrogenase family protein;(source:Araport11)
TraesCS2A02G278900	C1	43.9092	26.3482	20.2727	18.3699	12.9383	AT1G24360	AT1G24360	Dual mitochondrial and plastid localized b-ketoacyl- ACP reductase, a component of the fatty acid synthase complex.
TraesCS2A02G281100	C1	2.13514	1.42447	1.19745	1.51862	1.32344	AT5G38360	AT5G38360	alpha/beta-Hydrolases superfamily protein;(source:Araport11)
TraesCS2A02G281700	C1	13.841	4.91203	4.85953	11.2421	12.7001	AT3G48530	KING1	SNF1-related protein kinase regulatory subunit gamma 1;(source:Araport11)
TraesCS2A02G282200	C1	2.84367	0.297586	0.84582	0.936589	0.926297	AT3G11590;AT5G22310	AT3G11590;AT5G22310	golgin family A protein;(source:Araport11);trichohyalin-like protein;(source:Araport11)
TraesCS2A02G282700	C1	2.07099	0.764237	0	0.0281098	0	NA	NA	NA
TraesCS2A02G283200	C1	24.3027	10.5916	11.6906	3.29845	2.59562	NA	NA	NA
TraesCS2A02G283800	C1	11.3577	5.57216	7.43842	8.62882	7.48452	AT1G67310	CAMTA4	Calmodulin-binding transcription activator protein with CG-1 and Ankyrin domain;(source:Araport11)
TraesCS2A02G284500	C1	184.954	67.409	14.7237	17.5259	17.8064	AT3G02960;AT5G50740;AT5G63530	HIPP08;AT5G50740;HIPP07	Heavy metal transport/detoxification superfamily protein;(source:Araport11);Heavy metal transport/detoxification superfamily protein;(source:Araport11);Farnesylated protein that binds metals.
TraesCS2A02G285000	C1	9.1463	3.65899	5.60919	1.22798	0.148607	AT3G47350;AT3G47360;AT5G50590;AT5G50600;AT5G50690;AT5G50700;AT5G50770	ATHSD2;HSD3;HSD4;HSD1;HSD4;HSD1;HSD6	Encodes a putative hydroxysteroid dehydrogenase (HSD). Genes that encode HSD include: At5g50600 and At5g50700 (HSD1), At3g47350(HSD2), At3g47360(HSD3), At5g50590 and At5g50690(HSD4), At5g50770(HSD6) (Plant Cell Physiology 50:1463). Two copies of HSD1 and HSD4 exist due to a gene duplication event. In Plant Physiology 145:87, At5g50690 is HSD7, At4g10020 is HSD5.;Encodes a putative hydroxysteroid …
TraesCS2A02G285100	C1	61.3321	15.6995	9.78263	1.79882	0.62555	AT3G47350;AT3G47360;AT5G50590;AT5G50600;AT5G50690;AT5G50700;AT5G50770	ATHSD2;HSD3;HSD4;HSD1;HSD4;HSD1;HSD6	Encodes a putative hydroxysteroid dehydrogenase (HSD). Genes that encode HSD include: At5g50600 and At5g50700 (HSD1), At3g47350(HSD2), At3g47360(HSD3), At5g50590 and At5g50690(HSD4), At5g50770(HSD6) (Plant Cell Physiology 50:1463). Two copies of HSD1 and HSD4 exist due to a gene duplication event. In Plant Physiology 145:87, At5g50690 is HSD7, At4g10020 is HSD5.;Encodes a putative hydroxysteroid …
TraesCS2A02G285300	C1	0.500197	0.369339	0.0862395	0.305543	0.418729	AT3G01990	ACR6	Member of a small family of ACT domain containing proteins in Arabidopsis. ACT domains are involved in amino acid binding.
TraesCS2A02G285900	C1	4.08295	0.0358714	0.0739693	0.601117	0.81909	AT3G02040;AT5G41080;AT5G43300	GDPD1;GDPD2;GDPD3	Encodes a member of the glycerophosphodiester phosphodiesterase (GDPD) family. Has glycerophosphodiester phosphodiesterase activity. Functions in maintaining cellular phosphate homeostasis under phosphate starvation. The mRNA is cell-to-cell mobile.;Encodes a member of the glycerophosphodiester phosphodiesterase (GDPD) family.;Encodes a member of the glycerophosphodiester phosphodiesterase (GDPD)…
TraesCS2A02G286700	C1	2.46891	0.170959	0.246519	0.753407	0.957445	NA	NA	NA
TraesCS2A02G288900	C1	0.497042	0	0	0	0	NA	NA	NA
TraesCS2A02G290200	C1	5.53009	2.82849	2.93703	2.8868	2.88466	AT3G02070	AT3G02070	Cysteine proteinases superfamily protein;(source:Araport11)
TraesCS2A02G290600	C1	636.028	390.043	331.884	375.48	397.457	NA	NA	NA
TraesCS2A02G290800	C1	0.707974	0	0.025025	0	0	AT1G47980;AT3G62730	AT1G47980;AT3G62730	desiccation-like protein;(source:Araport11);desiccation-like protein;(source:Araport11)
TraesCS2A02G291800	C1	2.21028	1.12439	0.91233	2.61742	1.71843	NA	NA	NA
TraesCS2A02G291900	C1	4.03458	0	0.0372495	0.0951223	0.189807	AT1G08250;AT2G27820	ADT6;ADT3	Encodes a plastid-localized arogenate dehydratase involved in phenylalanine biosynthesis. Although this enzyme has sequence similarity to prephenate dehydratases, it is 98 times more active with arogenate than prephenate in enzymatic assays.;Encodes a plastid-localized arogenate dehydratase involved in phenylalanine biosynthesis. Not less than six genes encoding ADT were identi&#64257;ed in the A…
TraesCS2A02G292000	C1	3.79843	3.61224	0.907523	1.35297	1.92121	AT1G08250;AT2G27820	ADT6;ADT3	Encodes a plastid-localized arogenate dehydratase involved in phenylalanine biosynthesis. Although this enzyme has sequence similarity to prephenate dehydratases, it is 98 times more active with arogenate than prephenate in enzymatic assays.;Encodes a plastid-localized arogenate dehydratase involved in phenylalanine biosynthesis. Not less than six genes encoding ADT were identi&#64257;ed in the A…
TraesCS2A02G292300	C1	0.478358	0.305336	0.117524	0.166043	0.116126	AT2G27770;AT2G36470	AT2G27770;AT2G36470	DUF868 family protein (DUF868);(source:Araport11);DUF868 family protein, putative (DUF868);(source:Araport11)
TraesCS2A02G292400	C1	0.342809	0.145133	0	0.077359	0.0429677	AT3G10560;AT3G10570;AT5G04630;AT5G04660	UNE9;CYP77A6;CYP77A9;CYP77A4	member of CYP77A;member of CYP77A;member of CYP77A;encodes a protein with cytochrome P450 domain
TraesCS2A02G293300	C1	6.29883	5.74222	4.27496	6.03265	4.28904	NA	NA	NA
TraesCS2A02G293400	C1	36.1325	18.0943	35.9066	29.0112	16.0841	AT2G36390;AT5G03650	SBE2.1;SBE2.2	Encodes a starch branching enzyme (EC.2.4.1.18) similar to SBE2 from maize and rice. Expressed throughout plant tissues. The mRNA is cell-to-cell mobile.;Encodes starch branching enzyme (E.C.2.4.1.18) similar to SBE2 from maize and rice. Expressed throughout the plant and highest in seedlings and cauline leaves.
TraesCS2A02G294500	C1	10.8973	5.43212	6.80155	5.9895	8.19016	AT2G36250;AT3G52750	FTSZ2-1;FTSZ2-2	Encodes one of two FtsZ proteins, tubulin-like proteins, in Arabidopsis. It is involved in chloroplast division.;Nuclear gene that encodes a plastidial division protein (FtsZ2-2). FtsZ2-2 is involved in chloroplast morphology and internal organisation in addition to participating in chloroplast partition
TraesCS2A02G294700	C1	4.27194	0.0145934	0	0.258237	0.0156625	AT2G27500	AT2G27500	Glycosyl hydrolase superfamily protein;(source:Araport11)
TraesCS2A02G294800	C1	2.63655	0.577705	0.046075	0.47291	0.49751	AT3G52720	ACA1	Encodes an alpha carbonic anhydrase (CAH1) located in the chloroplast stroma. Most chloroplast proteins are encoded by the nuclear genome and imported with the help of sorting signals that are intrinsic parts of the polypeptides. CAH1 takes an alternative route through the secretory pathway, and becomes N-glycosylated before entering the chloroplast. Glycosylation and intra-molecular disulfide br…
TraesCS2A02G297100	C1	35.3512	19.2261	0.236643	0	0.458371	NA	NA	NA
TraesCS2A02G297300	C1	10.0576	4.48247	2.28324	4.07677	5.74695	AT2G27290	AT2G27290	FAM210B-like protein, putative (DUF1279);(source:Araport11)
TraesCS2A02G297500	C1	79.401	71.0398	49.2121	55.0195	56.6475	AT3G11630;AT5G06290	BAS1;2-Cys Prx B	Encodes a 2-Cys peroxiredoxin (2-Cys PrxA) that contains two catalytic Cys residues. Functions in redox cascade with TrxL2 via the ferredoxin-thioredoxin reductase (FTR)/thioredoxin (Trx) pathway to mediate the light-responsive reductive control of target proteins. Continuously transfers reducing power from TrxL2 to H2O2.;Encodes a 2-Cys peroxiredoxin (2-Cys PrxB) that contains two catalytic Cys …
TraesCS2A02G297800	C1	10.3239	0.795359	0.15952	0.0620944	0.0317189	AT3G11670	DGD1	Responsible for the final assembly of galactolipids in photosynthetic membranes. Provides stability to the PS I core complex (e.g. subunits PsaD, PsaE).
TraesCS2A02G298100	C1	5.1416	2.26681	1.72946	3.93178	3.41047	NA	NA	NA
TraesCS2A02G298600	C1	13.7136	2.12675	1.34453	1.5028	1.66521	AT3G18710;AT5G09800;AT5G64660	PUB29;PUB28;PUB27	Encodes a protein containing a U-box and an ARM domain. This protein has E3 ubiquitin ligase activity based on in vitro assays.;Plant U-box type E3 ubiquitin ligase (PUB).;CYS, MET, PRO, and GLY protein 2;(source:Araport11)
TraesCS2A02G299000	C1	0.350233	0	0	0	0	AT1G49200;AT1G49210;AT1G49220;AT1G49230;AT3G18773	ATL75;ATL76;ATL10;ATL78;ATL77	RING/U-box superfamily protein;(source:Araport11);RING/U-box superfamily protein;(source:Araport11);RING/U-box superfamily protein;(source:Araport11);RING/U-box superfamily protein;(source:Araport11);RING/U-box superfamily protein;(source:Araport11)
TraesCS2A02G302700	C1	5.28387	4.91381	2.60022	0.427768	0.132685	NA	NA	NA
TraesCS2A02G305000	C1	13.8595	1.60177	2.03671	2.08282	1.70688	NA	NA	NA
TraesCS2A02G305300	C1	241.557	56.4269	90.9267	13.6792	5.69208	NA	NA	NA
TraesCS2A02G305400	C1	0.61019	0	0	0.0199817	0.0408203	AT1G75240;AT2G18350;AT3G50890	ZHD5;ZHD6;ZHD7	Encodes a zinc finger-homeodomain transcription factor ZHD5. Nuclear import and DNA binding of the ZHD5 transcription factor is modulated by a competitive peptide inhibitor MIF1 (AT1G74660).;homeobox protein 24;(source:Araport11);homeobox protein 28;(source:Araport11)
TraesCS2A02G306100	C1	7.21589	1.1536	0.757166	1.57764	2.01439	AT1G77290	TCHQD	Glutathione S-transferase family protein;(source:Araport11)
TraesCS2A02G306400	C1	8.98855	3.99603	4.84176	5.7102	5.03776	AT5G63860	UVR8	UV-B-specific signaling component that orchestrates expression of a range of genes with vital UV-protective functions. Located in the nucleus and the cytosol. Associates with chromatin via histones. UV-B light promotes URV8 protein accumulation in the nucleus. UVR8 interaction with COP1 is negatively regulated by RUP1 and RUP2.
TraesCS2A02G307900	C1	3.85777	1.66914	1.58066	3.45507	2.72376	AT1G22930;AT4G09150	AT1G22930;AT4G09150	T-complex protein 11;(source:Araport11);T-complex protein 11;(source:Araport11)
TraesCS2A02G309500	C1	15.9623	8.32084	7.24316	10.0806	12.3338	AT5G23520	AT5G23520	smr (Small MutS Related) domain-containing protein;(source:Araport11)
TraesCS2A02G309900	C1	8.69433	2.66892	1.70691	6.61536	4.03424	AT5G49890	CLC-C	member of Anion channel protein family
TraesCS2A02G310900	C1	2.00417	1.0828	1.1822	1.49412	1.42162	AT4G10000	AT4G10000	Thioredoxin family protein;(source:Araport11)
TraesCS2A02G312900	C1	320.087	0.166701	0	0	0.0282174	AT1G76770	AT1G76770	HSP20-like chaperone
TraesCS2A02G313000	C1	21.1916	13.6318	16.9702	16.2607	21.4807	AT4G10300	AT4G10300	RmlC-like cupins superfamily protein. Overexpression leads to trehalose resistance, drought and stress tolerance.
TraesCS2A02G313100	C1	11.602	9.73116	2.53352	0.538869	0.273957	NA	NA	NA
TraesCS2A02G314700	C1	8.57884	1.58275	1.44683	1.65918	1.64773	NA	NA	NA
TraesCS2A02G314900	C1	1.56637	1.14696	1.40685	1.11158	1.64216	AT1G09900;AT1G79080;AT3G04760	AT1G09900;AT1G79080;AT3G04760	Pentatricopeptide repeat (PPR-like) superfamily protein;(source:Araport11);Pentatricopeptide repeat (PPR) superfamily protein;(source:Araport11);Pentatricopeptide repeat (PPR-like) superfamily protein;(source:Araport11)
TraesCS2A02G315100	C1	38.9706	3.87928	4.02129	6.06583	5.28354	AT1G17420;AT1G72520	LOX3;LOX4	LOX3 encode a Lipoxygenase. Lipoxygenases (LOXs) catalyze the oxygenation of fatty acids (FAs).;PLAT/LH2 domain-containing lipoxygenase family protein;(source:Araport11)
TraesCS2A02G317900	C1	169.914	74.9746	25.4542	39.523	28.0894	AT4G24380;AT5G65400	AT4G24380;AT5G65400	dihydrofolate reductase;(source:Araport11);alpha/beta-Hydrolases superfamily protein;(source:Araport11)
TraesCS2A02G318200	C1	5.38351	2.13554	0.464005	1.06115	0.71444	AT1G22500;AT1G35330;AT1G72200;AT2G34990;AT2G35000;AT3G05200;AT4G09110;AT4G09120;AT4G09130;AT4G40070;AT5G27420	ATL15;AT1G35330;ATL11;AT2G34990;ATL9;ATL6;ATL35;ATL36;ATL37;ATL32;ATL31	Gene encodes a putative C3HC4-type RING zinc finger factor. it is induced in response to light and ascorbate stimulus.;RING/U-box superfamily protein;(source:Araport11);RING/U-box superfamily protein;(source:Araport11);RING/U-box superfamily protein;(source:Araport11);ATL9 is an E3 ligase-like protein that is induced by chitin oligomers and contributes to fungal resistance.It differs from other m…
TraesCS2A02G321600	C1	4.24483	1.57536	1.51273	1.40067	1.50428	AT3G27390;AT5G40640	AT3G27390;AT5G40640	transmembrane protein;(source:Araport11);transmembrane protein;(source:Araport11)
TraesCS2A02G322500	C1	0.45651	0.197384	0.0347703	0	0	NA	NA	NA
TraesCS2A02G325800	C1	0.672441	0.123787	0.184893	0.0256255	0.0215315	AT1G10810;AT1G60680;AT1G60690;AT1G60710;AT1G60730;AT1G60750	AT1G10810;AGD2;AT1G60690;ATB2;AT1G60730;AT1G60750	NAD(P)-linked oxidoreductase superfamily protein;(source:Araport11);NAD(P)-linked oxidoreductase superfamily protein;(source:Araport11);NAD(P)-linked oxidoreductase superfamily protein;(source:Araport11);Encodes ATB2.;NAD(P)-linked oxidoreductase superfamily protein;(source:Araport11);NAD(P)-linked oxidoreductase superfamily protein;(source:Araport11)
TraesCS2A02G327700	C1	4.27115	2.61006	3.02516	3.06841	4.05085	AT1G70590	AT1G70590	F-box family protein;(source:Araport11)
TraesCS2A02G330000	C1	11.2115	11.8688	2.601	3.38931	3.09822	NA	NA	NA
TraesCS2A02G330200	C1	27.0795	17.9463	20.0666	16.9479	11.0695	AT1G66970;AT1G66980;AT3G20520;AT4G26690;AT5G55480	SVL2;SNC4;GDPDL5;GDPDL3;GDPDL4	Encodes a member of the glycerophosphodiester phosphodiesterase like (GDPD-like) family.;Encodes SNC4 (suppressor of npr1-1, constitutive 4), an atypical receptor-like kinase with two predicted extracellular glycerophosphoryl diester phosphodiesterase domains.;Encodes a member of the glycerophosphodiester phosphodiesterase like (GDPD-like) family.;Glycerophosphoryl diester phosphodiesterase-like …
TraesCS2A02G331700	C1	25.2141	19.0644	17.965	16.9341	14.0368	AT5G47810	PFK2	phosphofructokinase 2;(source:Araport11)
TraesCS2A02G331800	C1	6.27572	3.23405	2.83227	2.80598	1.1432	NA	NA	NA
TraesCS2A02G332800	C1	2.73055	0.117065	0	0.648793	1.66491	NA	NA	NA
TraesCS2A02G333100	C1	0.597266	0	0	0	0	AT3G07600;AT5G48290;AT5G52680;AT5G52690;AT5G52700;AT5G52710;AT5G52730	HIPP16;AT5G48290;AT5G52680;AT5G52690;AT5G52700;AT5G52710;HIPP11	Heavy metal transport/detoxification superfamily protein;(source:Araport11);Heavy metal transport/detoxification superfamily protein;(source:Araport11);Copper transport protein family;(source:Araport11);Copper transport protein family;(source:Araport11);Member of plant specific copper transport protein family. Expressed in response to Al treatment.;Copper transport protein family;(source:Araport1…
TraesCS2A02G334600	C1	16.8851	2.51196	1.63518	0.456698	0.460301	AT5G08170	AIH	porphyromonas-type peptidyl-arginine deiminase family protein;(source:Araport11)
TraesCS2A02G336500	C1	22.8992	15.5532	13.8891	18.163	13.2423	AT1G24807;AT1G24909;AT1G25083;AT1G25155;AT1G25220;AT5G57890	AT1G24807;AT1G24909;AT1G25083;AT1G25155;ASB1;ASB2	Glutamine amidotransferase type 1 family protein;(source:Araport11);Glutamine amidotransferase type 1 family protein;(source:Araport11);Glutamine amidotransferase type 1 family protein;(source:Araport11);Glutamine amidotransferase type 1 family protein;(source:Araport11);Catalyzes the first step of tryptophan biosynthesis: Chorismate L-Glutamine = Anthranilate Pyruvate L-Glutamate. Functions as a…
TraesCS2A02G337300	C1	147.237	86.5491	54.0414	52.9975	54.1207	NA	NA	NA
TraesCS2A02G338600	C1	0.956812	0.802226	0.112291	0.23051	0	NA	NA	NA
TraesCS2A02G342500	C1	10.2084	0.7447	0	0.0458203	0.0416193	NA	NA	NA
TraesCS2A02G342600	C1	0.204556	0	0	0	0	AT1G15820	LHCB6	Lhcb6 protein (Lhcb6), light harvesting complex of photosystem II.
TraesCS2A02G343000	C1	1.50561	0	0	0	0	NA	NA	NA
TraesCS2A02G343500	C1	39.2282	15.6144	8.47468	8.25285	6.30382	AT3G01260;AT3G47800;AT5G15140	AT3G01260;AT3G47800;AT5G15140	Galactose mutarotase-like superfamily protein;(source:Araport11);Galactose mutarotase-like superfamily protein;(source:Araport11);Galactose mutarotase-like superfamily protein;(source:Araport11)
TraesCS2A02G343600	C1	6.07102	4.36015	0.608353	0.837856	0.311537	AT3G01260;AT3G47800;AT5G15140	AT3G01260;AT3G47800;AT5G15140	Galactose mutarotase-like superfamily protein;(source:Araport11);Galactose mutarotase-like superfamily protein;(source:Araport11);Galactose mutarotase-like superfamily protein;(source:Araport11)
TraesCS2A02G344800	C1	1.85631	0.46927	0.845049	0.753635	1.00191	AT1G69680	AT1G69680	ran guanine nucleotide release factor, putative (Mog1/PsbP/DUF1795-like photosystem II reaction center PsbP family protein);(source:Araport11)
TraesCS2A02G346700	C1	3.54544	2.66322	2.85831	0.717212	0.0948717	NA	NA	NA
TraesCS2A02G347800	C1	1.68235	1.03214	0.90206	1.26555	1.37785	AT1G24330;AT1G27910;AT1G67530	PUB6;PUB45;PUB7	Plant U-box type E3 ubiquitin ligase (PUB).;Encodes a protein containing a UND, a U-box, and an ARM domain. This protein has E3 ubiquitin ligase activity based on in vitro assays.;ARM repeat superfamily protein;(source:Araport11)
TraesCS2A02G348500	C1	0.111024	0.0951888	0.00759753	0.0387418	0.0206822	NA	NA	NA
TraesCS2A02G348600	C1	3.09108	2.32387	0.124378	0.22955	0.156688	AT5G09220;AT5G63850	AAP2;AAP4	member of AAAP family The mRNA is cell-to-cell mobile.;Amino acid transporter whose expression is downregulated by dehydration.
TraesCS2A02G349100	C1	16.505	0.267338	0.555825	2.45711	1.83413	AT1G05990;AT2G43290;AT3G07490;AT3G59440;AT4G03290;AT4G12860	CML7;CML5;CML3;CML4;CML6;CML2	EF hand calcium-binding protein family;(source:Araport11);Calmodulin-like MSS3.Encodes an endomembrane localized member of the CML subfamily VII. Contains a canonical CaM domain and unique N-terminal extension that distinguishes it from other members of the subfamily.;A member of ARF GAP domain (AGD), A thaliana has 15 members, grouped into four classes.;Encodes an endomembrane localized member o…
TraesCS2A02G349300	C1	19.8941	9.97079	10.3201	17.5227	11.4782	AT2G43320	AT2G43320	S-adenosyl-L-methionine-dependent methyltransferases superfamily protein;(source:Araport11)
TraesCS2A02G351400	C1	0.43165	0.0207247	0	0	0	AT1G80240	AT1G80240	DUF642 gene
TraesCS2A02G351700	C1	0.91998	0	0	0.340238	0.239479	AT1G80240	AT1G80240	DUF642 gene
TraesCS2A02G352100	C1	7.03743	0.519064	2.67091	5.68161	6.02775	AT1G06070;AT2G31370	AT1G06070;POSF21	Basic-leucine zipper (bZIP) transcription factor family protein;(source:Araport11);Basic-leucine zipper (bZIP) transcription factor family protein;(source:Araport11)
TraesCS2A02G352800	C1	64.7862	30.5936	12.386	18.5224	8.69182	AT1G65610	KOR2	Six-hairpin glycosidases superfamily protein;(source:Araport11)
TraesCS2A02G354400	C1	0.605647	0	0	0	0	NA	NA	NA
TraesCS2A02G355300	C1	31.1384	30.8729	12.0033	8.14028	6.9229	AT2G24800;AT4G31760	PER18;PER46	Peroxidase superfamily protein;(source:Araport11);peroxidase superfamily protein;(source:Araport11)
TraesCS2A02G355600	C1	0.597203	0.0237323	0.0255038	0.0509074	0.0231873	AT1G77090	PPD4	thylakoid lumenal protein (Mog1/PsbP/DUF1795-like photosystem II reaction center PsbP family protein);(source:Araport11)
TraesCS2A02G355800	C1	0.876904	0.0213151	0.0458124	0	0.0624165	AT1G77100;AT4G25980	PER13;PER43	peroxidase superfamily protein;(source:Araport11);peroxidase superfamily protein;(source:Araport11)
TraesCS2A02G357200	C1	12.8987	11.9091	10.5396	12.8608	6.97124	AT1G10030	ERG28	Encodes a protein that functions as a scaffolding platform for coassembling the sterol C4 demethylation enzyme complex. It also plays an essential role in the maintenance of polar auxin transport (PAT) by restricting the release and accumulation of 4-carboxy-4-methyl-24-methylenecycloartanol (CMMC), a PAT inhibitor.
TraesCS2A02G357500	C1	10.7586	9.09924	7.81228	11.5241	7.85228	AT4G32060	MICU	Encodes an EF-hand protein with homology to constituents of the mitochondrial Ca2+ uniporter machinery in mammals. MICU binds Ca2+ and localizes to the mitochondria in Arabidopsis. It is a negative regulator of mitochondrial calcium uptake. Mutants display elevated matrix calcium at steady state and modified calcium transient kinetics in vivo.
TraesCS2A02G359300	C1	11.7679	6.77516	0.985088	0.224142	0.70315	AT1G49750;AT3G19320;AT4G06744	AT1G49750;AT3G19320;AT4G06744	Leucine-rich repeat (LRR) family protein;(source:Araport11);Leucine-rich repeat (LRR) family protein;(source:Araport11);Leucine-rich repeat (LRR) family protein;(source:Araport11)
TraesCS2A02G361900	C1	0.782178	0.365271	0.586597	0.745817	0.583307	AT2G20240;AT4G28760;AT5G43880	AT2G20240;AT4G28760;AT5G43880	GPI-anchored adhesin-like protein, putative (DUF3741);(source:Araport11);methyl-coenzyme M reductase II subunit gamma, putative (DUF3741);(source:Araport11);methyl-coenzyme M reductase II subunit gamma, putative (DUF3741);(source:Araport11)
TraesCS2A02G362700	C1	6.23088	1.35976	0.168719	2.1059	2.99306	AT4G28780	AT4G28780	GDSL-motif esterase/acyltransferase/lipase. Enzyme group with broad substrate specificity that may catalyze acyltransfer or hydrolase reactions with lipid and non-lipid substrates.
TraesCS2A02G362800	C1	0.769213	0.127312	0.065028	0.149331	0.0969293	AT1G23360	MENG	Encodes a 2-phytyl-1,4-naphthoquinone methyltransferase that catalyzes the final step in phylloquinone (vitamin K1) biosynthesis.
TraesCS2A02G364500	C1	2.14705	1.37591	0.812992	1.51917	1.31973	AT4G13550	AT4G13550	Heat stress inducible plastid monogalactosyldiacylglycerol lipase.
TraesCS2A02G367000	C1	31.8508	22.0086	12.6198	25.0201	14.7085	AT1G04530	TPR4	Encodes one of the 36 carboxylate clamp (CC)-tetratricopeptide repeat (TPR) proteins (Prasad 2010, Pubmed ID: 20856808) with potential to interact with Hsp90/Hsp70 as co-chaperones.
TraesCS2A02G367200	C1	742.876	197.378	193.411	12.5012	3.79542	NA	NA	NA
TraesCS2A02G370000	C1	1.23649	0.0213379	0	0.0530985	0.163239	AT3G61250	AtMYB17	LATE MERISTEM IDENTITY2 (LMI2) is a target of the meristem identity regulator LEAFY (LFY). Has a role in the meristem identity transition from vegetative growth to flowering. Member of the R2R3 factor gene family.
TraesCS2A02G370300	C1	1.85988	0.929196	0.4611	1.16632	0.463553	NA	NA	NA
TraesCS2A02G370700	C1	0.251256	0	0	0.331028	0.0715523	NA	NA	NA
TraesCS2A02G370900	C1	0.358899	0	0	0	0.0281412	AT1G01800;AT2G24190;AT3G61220	AT1G01800;AT2G24190;AT3G61220	NAD(P)-binding Rossmann-fold superfamily protein;(source:Araport11);Encodes an aldehyde reductase that catalyzes the reduction of the aldehyde carbonyl groups on saturated and alpha,beta-unsaturated aldehydes with more than 5 carbons in vitro. In addition, this enzyme can reduce methylglyoxal in vitro. It is believed that this enzyme localizes to the cytosol like the closely related protein encod…
TraesCS2A02G371200	C1	0.836735	0.428084	0.0838965	0.0558211	0.126361	AT1G01800;AT2G24190;AT3G61220	AT1G01800;AT2G24190;AT3G61220	NAD(P)-binding Rossmann-fold superfamily protein;(source:Araport11);Encodes an aldehyde reductase that catalyzes the reduction of the aldehyde carbonyl groups on saturated and alpha,beta-unsaturated aldehydes with more than 5 carbons in vitro. In addition, this enzyme can reduce methylglyoxal in vitro. It is believed that this enzyme localizes to the cytosol like the closely related protein encod…
TraesCS2A02G371400	C1	0.48584	0.030408	0	0	0	AT1G01800;AT2G24190;AT3G61220	AT1G01800;AT2G24190;AT3G61220	NAD(P)-binding Rossmann-fold superfamily protein;(source:Araport11);Encodes an aldehyde reductase that catalyzes the reduction of the aldehyde carbonyl groups on saturated and alpha,beta-unsaturated aldehydes with more than 5 carbons in vitro. In addition, this enzyme can reduce methylglyoxal in vitro. It is believed that this enzyme localizes to the cytosol like the closely related protein encod…
TraesCS2A02G371600	C1	43.7389	21.8436	11.2164	16.3031	21.0641	NA	NA	NA
TraesCS2A02G371700	C1	28.971	14.1421	8.13715	12.8248	12.3648	NA	NA	NA
TraesCS2A02G372100	C1	8.46542	6.87375	4.57567	4.09581	3.11741	AT1G13250	GATL3	Encodes a protein with putative galacturonosyltransferase activity.
TraesCS2A02G372500	C1	19.0338	9.28816	6.33965	12.3892	11.2888	AT1G03680;AT4G03520	ATHM1;ATHM2	Encodes a m-type thioredoxin (Trx-m1) localized in chloroplast stroma.;Encodes a redox activated co-chaperone, chloroplast localized thioredoxin, similar to prokaryotic types.
TraesCS2A02G373600	C1	5.61651	0.440536	2.37141	2.56211	1.762	AT1G32900	GBSS1	UDP-Glycosyltransferase superfamily protein;(source:Araport11)
TraesCS2A02G375400	C1	2.35443	0.810279	0	0	0	NA	NA	NA
TraesCS2A02G375600	C1	17.4889	7.24391	2.33527	0.706353	0.918749	NA	NA	NA
TraesCS2A02G376300	C1	2.14265	0.0461854	0.0348124	0.132096	0.690549	AT5G08260	SCPL35	serine carboxypeptidase-like 35;(source:Araport11)
TraesCS2A02G376600	C1	0.704092	0.355882	0.152508	0.0410449	0	AT3G19800	AT3G19800	Encodes the DUF177B version of the two DUF177 proteins in Arabidopsis. This version differs from DUF177A in containing a 23 aa insertion compared to the DUF177A sequence.
TraesCS2A02G377600	C1	0.287939	0.00985559	0.0346677	0.0251776	0.0429025	AT1G65730	YSL7	Arabidopsis thaliana metal-nicotianamine transporter YSL4
TraesCS2A02G378300	C1	2.17225	0.157581	0.34995	0.434719	0.717002	NA	NA	NA
TraesCS2A02G379600	C1	10.6782	6.20248	3.13641	5.34503	6.39567	NA	NA	NA
TraesCS2A02G380200	C1	12.0005	6.16167	6.83776	6.43499	3.62212	AT5G20660	AT5G20660	Zn-dependent exopeptidases superfamily protein;(source:Araport11)
TraesCS2A02G381900	C1	56.3275	31.6169	21.5969	30.9772	36.0773	NA	NA	NA
TraesCS2A02G382200	C1	33.2745	20.1307	27.9656	25.0223	30.3077	NA	NA	NA
TraesCS2A02G383100	C1	20.5122	19.493	15.1088	13.5507	11.8433	AT2G22230;AT5G10160	AT2G22230;AT5G10160	Thioesterase superfamily protein;(source:Araport11);Thioesterase superfamily protein;(source:Araport11)
TraesCS2A02G384100	C1	0.658101	0.1836	0.242649	0.316774	0.33776	NA	NA	NA
TraesCS2A02G385600	C1	13.9126	5.99612	1.20151	1.04852	1.40291	AT2G33380	PXG3	Encodes a calcium binding protein whose mRNA is induced upon treatment with NaCl, ABA and in response to desiccation. mRNA expression under drought conditions is apparent particularly in leaves and flowers. Isoform of caleosin with a role as a peroxygenase involved in oxylipin metabolism during biotic and abiotic stress. Involved in the production of 2-hydroxy-octadecatrienoic acid. The peroxygen…
TraesCS2A02G385700	C1	0.306295	0	0	0	0	AT2G33380	PXG3	Encodes a calcium binding protein whose mRNA is induced upon treatment with NaCl, ABA and in response to desiccation. mRNA expression under drought conditions is apparent particularly in leaves and flowers. Isoform of caleosin with a role as a peroxygenase involved in oxylipin metabolism during biotic and abiotic stress. Involved in the production of 2-hydroxy-octadecatrienoic acid. The peroxygen…
TraesCS2A02G385800	C1	0.296027	0.0640137	0	0.136204	0	NA	NA	NA
TraesCS2A02G386400	C1	8.43495	2.57709	3.05881	4.19322	6.80061	AT4G12410;AT4G22620	AT4G12410;AT4G22620	SAUR-like auxin-responsive protein family;(source:Araport11);SAUR-like auxin-responsive protein family;(source:Araport11)
TraesCS2A02G386800	C1	530.41	11.6151	6.51203	28.9076	20.8104	AT1G12270;AT1G62740;AT4G12400	HOP1;HOP2;HOP3	Encodes one of the 36 carboxylate clamp (CC)-tetratricopeptide repeat (TPR) proteins (Prasad 2010, Pubmed ID: 20856808) with potential to interact with Hsp90/Hsp70 as co-chaperones.;Encodes one of the 36 carboxylate clamp (CC)-tetratricopeptide repeat (TPR) proteins (Prasad 2010, Pubmed ID: 20856808) with potential to interact with Hsp90/Hsp70 as co-chaperones. The mRNA is cell-to-cell mobile.;En…
TraesCS2A02G387000	C1	3.5913	2.75396	1.82034	1.60951	1.66796	AT1G62750	CPEFG	Nuclear encoded protein consists of the five domains conserved in EF-G proteins, with two GTP-binding sites in the first domain, and an additional transit peptide at the N-terminus. Localized in chloroplasts. Point mutation results in a delay in the onset of germination. At early developmental stage embryos still contain undifferentiated proplastids. The greening of cotyledons is severely impaire…
TraesCS2A02G387700	C1	6.4107	0.0541957	0.560617	8.71954	1.47957	NA	NA	NA
TraesCS2A02G388500	C1	0.319036	0.0675489	0.0259393	0.0833012	0.0744544	AT1G75540;AT4G39070	BBX21;BBX20	Encodes a B-box zinc finger transcription factor BBX21 (also named STH2/salt tolerance homolog2 and LHUS/long hypocotyl under shade). Interacts with COP1 to control de-etiolation. Also genetically interacts with COP1 to regulate shade avoidance. The mRNA is cell-to-cell mobile.;Encodes BZS1, a brassinosteroids-regulated BZR1 target (BRBT) gene. BZS1 is a putative zinc finger transcription factor.…
TraesCS2A02G388600	C1	1.3035	0.0944801	0.135134	0.28693	0.384059	AT1G09790	COBL6	COBRA-like protein 6 precursor;(source:Araport11)
TraesCS2A02G389100	C1	1.67545	0.0320066	0.0700119	0.266748	0.54315	AT1G33260;AT4G10390	AT1G33260;AT4G10390	Protein kinase superfamily protein;(source:Araport11);Protein kinase superfamily protein;(source:Araport11)
TraesCS2A02G389200	C1	25.2471	21.0789	8.63747	6.32167	3.18938	AT1G33240;AT1G76880;AT1G76890	AT-GTL1;AT1G76880;GT-2	Encodes a plant transcriptional activator that contains two separate, but similar, trihelix DNA-binding domains, similar to GT-2. Gene is expressed in all aerial parts of the plant, with higher level of expression in siliques. At-GTL2 was thought to be a duplicated copy of this gene but is likely to be a cloning artefact, the result of a chimeric clone. Regulates ploidy-dependent cell growth in t…
TraesCS2A02G389600	C1	8.85024	4.70763	6.86249	7.30371	8.55827	AT2G22740;AT2G35160	SUVH6;SUVH5	Encodes a SU(VAR)3-9 homolog, a methyltransferase involved in histone methylation. The protein was shown to bind to methylated cytosines of CG, CNG and CNN motifs but has a preference for the latter two. This is a member of a subfamily of SET proteins that shares a conserved SRA domain.;Encodes SU(var)3-9 homologue 5 (SUVH5). SUVH5 has histone methyltransferase (MTase) activity in vitro and contr…
TraesCS2A02G389800	C1	14.3933	6.55253	10.4692	9.81065	12.6217	NA	NA	NA
TraesCS2A02G390600	C1	0.875273	0.410862	0.308666	0.238449	0.22809	AT3G60240	EIF4G	protein synthesis initiation factor 4G (EIF4G). A mutation in this gene (cum2-1) results in decreased accumulation of CMV coat protein in upper, uninoculated leaves. Likely affects cell-to-cell movement of the virus, also affects TCV multiplication.
TraesCS2A02G392500	C1	28.5681	0.0294463	0	0.198583	0.482898	NA	NA	NA
TraesCS2A02G393400	C1	2.03773	0.0728068	0.0220881	0.139497	0.438798	NA	NA	NA
[truncated: 38,292 more rows]

## Sheet: Table S2
Table S2. The transcription factor family enrichment analysis.
Cluster	Family	GeneRatio	BgRatio	FoldEnrichment	pvalue	p.adjust	qvalue	geneID	Count
[truncated: 237 more rows]

## Sheet: Table S3
Table S3. The gene ontology enrichment analysis for each RNA cluster.
[truncated: 1,884 more rows]
