# Supplementary material for: Uncovering transcriptional regulatory network during regeneration for boosting wheat transformation
Source: Research Square preprint supplement (doi:10.21203/rs.3.rs-2192210/v1), 2022-10-28
Supplement: Supplementary file 4 [file 7ba736473893aa1a082d9f9b.xlsx]

## Sheet: Table S25
Table S25. Target genes of TaDOF5.6 in transcriptional regulatory network.
TF	target.GeneID	target.Cluster	target.tairID	target.tairName	target.Family
TaDOF5.6	TraesCS7D02G261600	C1	AT1G24260	2022-09-03	MIKC_MADS
TaDOF5.6	TraesCS2B02G510100	C1	AT3G20660	2022-10-04	NA
TaDOF5.6	TraesCS5B02G380500	C6	AT3G13050	2022-10-07	NA
TaDOF5.6	TraesCS5A02G377000	C6	AT3G13050	2022-10-07	NA
TaDOF5.6	TraesCS2B02G275100	C6	AT1G62180;AT4G04610;AT4G21990	2-Apr;1-Apr;3-Apr	NA
TaDOF5.6	TraesCS6B02G294100	C1	AT1G65060	4CL3	NA
TaDOF5.6	TraesCS5A02G498800	C5	AT1G20480;AT1G20500;AT1G20510;AT5G38120	4CLL2;4CLL4;4CLL5;4CLL8	NA
TaDOF5.6	TraesCS1D02G200200	C6	AT4G19010	4CLL6	NA
TaDOF5.6	TraesCS1B02G211300	C6	AT4G19010	4CLL6	NA
TaDOF5.6	TraesCS3D02G388000	C1	AT5G63380	4CLL9	NA
TaDOF5.6	TraesCS3D02G388100	C5	AT5G63380	4CLL9	NA
TaDOF5.6	TraesCS4D02G362900	C6	AT2G45040	4MMP	NA
TaDOF5.6	TraesCS4A02G107700	C5	AT1G07920;AT1G07930;AT1G07940;AT1G35550;AT5G60390	A1;A1;A1;AT1G35550;A1	NA
TaDOF5.6	TraesCSU02G121800	C6	AT1G20560;AT1G76290;AT2G17650	AAE1;AEE21;AAE2	NA
TaDOF5.6	TraesCS5B02G463700	C5	AT1G55320	AAE18	NA
TaDOF5.6	TraesCS2A02G581600	C6	AT3G48990	AAE3	NA
TaDOF5.6	TraesCS5D02G436000	C6	AT1G04580;AT2G27150;AT3G43600;AT5G20960	AAO4;AAO3;AAO2;AAO1	NA
TaDOF5.6	TraesCS2A02G268200	C5	AT1G10010;AT1G58360;AT5G49630	AAP8;AAP1;AAP6	NA
TaDOF5.6	TraesCS2D02G256000	C5	AT1G10010;AT1G58360;AT5G49630	AAP8;AAP1;AAP6	NA
TaDOF5.6	TraesCS3A02G233300	C6	AT1G15500;AT1G80300	AATP2;AATP1	NA
TaDOF5.6	TraesCS5B02G188600	C5	AT3G47740;AT3G47750;AT3G47760;AT3G47770;AT3G47780;AT3G47790;AT5G61700;AT5G61740	ABCA3;ABCA4;ABCA5;ABCA6;ABCA7;ABCA8;ABCA12;ABCA10	NA
TaDOF5.6	TraesCS7A02G284900	C5	AT2G36910	ABCB1	NA
TaDOF5.6	TraesCS7D02G284100	C6	AT2G36910	ABCB1	NA
TaDOF5.6	TraesCS6D02G250000	C1	AT1G10680;AT4G25960	ABCB10;ABCB2	NA
TaDOF5.6	TraesCS1A02G081300	C6	AT1G02520;AT1G02530;AT2G47000;AT3G62150;AT4G01820;AT4G01830	ABCB11;ABCB12;ABCB4;ABCB21;ABCB3;ABCB5	NA
TaDOF5.6	TraesCS7A02G119300	C2	AT3G59140	ABCC10	NA
TaDOF5.6	TraesCS7D02G114100	C6	AT3G59140	ABCC10	NA
TaDOF5.6	TraesCS7D02G114200	C6	AT3G59140	ABCC10	NA
TaDOF5.6	TraesCS5D02G480600	C5	AT2G47800;AT3G62700	ABCC4;ABCC14	NA
TaDOF5.6	TraesCS5B02G479900	C5	AT2G47800;AT3G62700	ABCC4;ABCC14	NA
TaDOF5.6	TraesCS5A02G512500	C5	AT1G04120	ABCC5	NA
TaDOF5.6	TraesCS4D02G000500	C1	AT5G60790	ABCF1	NA
TaDOF5.6	TraesCS3A02G355700	C6	AT3G54540	ABCF4	NA
TaDOF5.6	TraesCS1B02G147700	C5	AT1G51460;AT1G51500;AT3G21080;AT3G21090	ABCG13;ABCG12;AT3G21080;ABCG15	NA
TaDOF5.6	TraesCS3D02G124400	C1	AT2G26910	ABCG32	NA
TaDOF5.6	TraesCS7A02G356100	C5	AT1G15210;AT1G59870	ABCG35;ABCG36	NA
TaDOF5.6	TraesCS3A02G371800	C1	AT2G36270	ABI5	bZIP
TaDOF5.6	TraesCS3D02G364900	C5	AT2G36270	ABI5	bZIP
TaDOF5.6	TraesCS1A02G272300	C5	AT5G64750	ABR1	ERF
TaDOF5.6	TraesCS2A02G294800	C1	AT3G52720	ACA1	NA
TaDOF5.6	TraesCS5B02G135200	C6	AT2G41560;AT3G57330	ACA4;ACA11	NA
TaDOF5.6	TraesCS7D02G523800	C5	AT1G08065;AT1G08080;AT2G28210;AT5G56330	ACA5;ACA7;ATACA2;ATACA8	NA
TaDOF5.6	TraesCS7A02G089600	C5	AT1G08065;AT1G08080;AT2G28210;AT5G56330	ACA5;ACA7;ATACA2;ATACA8	NA
TaDOF5.6	TraesCS7D02G085100	C5	AT1G08065;AT1G08080;AT2G28210;AT5G56330	ACA5;ACA7;ATACA2;ATACA8	NA
TaDOF5.6	TraesCS2D02G430700	C1	AT3G21180	ACA9	NA
TaDOF5.6	TraesCS6A02G152700	C2	AT3G21180	ACA9	NA
TaDOF5.6	TraesCS7A02G254400	C6	AT3G21180	ACA9	NA
TaDOF5.6	TraesCS7B02G150600	C6	AT3G21180	ACA9	NA
TaDOF5.6	TraesCS4A02G356400	C6	AT3G05420;AT5G27630	ACBP4;ACBP5	NA
TaDOF5.6	TraesCS3B02G221800	C5	AT3G06650	ACLB-1	NA
TaDOF5.6	TraesCS5A02G505000	C5	AT4G35830	ACO1	NA
TaDOF5.6	TraesCS6A02G325700	C5	AT1G05010;AT1G12010;AT1G62380	ACO4;AT1G12010;ACO2	NA
TaDOF5.6	TraesCS6D02G305400	C5	AT1G05010;AT1G12010;AT1G62380	ACO4;AT1G12010;ACO2	NA
TaDOF5.6	TraesCS2D02G091700	C2	AT5G25320	ACR2	NA
TaDOF5.6	TraesCS6A02G220400	C5	AT1G76990	ACR3	NA
TaDOF5.6	TraesCS4D02G224900	C1	AT1G12420;AT4G22780	ACR8;ACR7	NA
TaDOF5.6	TraesCS4B02G224300	C1	AT1G12420;AT4G22780	ACR8;ACR7	NA
TaDOF5.6	TraesCS1B02G046300	C1	AT2G39570	ACR9	NA
TaDOF5.6	TraesCS2A02G396400	C5	AT4G11280	ACS6	NA
TaDOF5.6	TraesCS2B02G414800	C5	AT4G11280	ACS6	NA
TaDOF5.6	TraesCS2D02G394200	C5	AT4G11280	ACS6	NA
TaDOF5.6	TraesCS2A02G369700	C5	AT4G25570	ACYB-2	NA
TaDOF5.6	TraesCS2B02G386700	C6	AT4G25570	ACYB-2	NA
TaDOF5.6	TraesCS4A02G071400	C5	AT2G16700;AT4G34970	ADF5;ADF9	NA
TaDOF5.6	TraesCS4D02G228100	C5	AT2G16700;AT4G34970	ADF5;ADF9	NA
TaDOF5.6	TraesCS4B02G227300	C5	AT2G16700;AT4G34970	ADF5;ADF9	NA
TaDOF5.6	TraesCS4A02G202100	C1	AT1G77120	ADH1	NA
TaDOF5.6	TraesCS4A02G106500	C5	AT3G07630	ADT2	NA
TaDOF5.6	TraesCS2A02G292000	C1	AT1G08250;AT2G27820	ADT6;ADT3	NA
TaDOF5.6	TraesCS2B02G308400	C1	AT1G08250;AT2G27820	ADT6;ADT3	NA
TaDOF5.6	TraesCS2A02G444300	C5	AT1G68310;AT3G09380	AE7;AEL2	NA
TaDOF5.6	TraesCS6A02G283500	C5	AT5G10760;AT5G10770	AED1;AT5G10770	NA
TaDOF5.6	TraesCS4A02G250800	C1	AT1G72280	AERO1	NA
TaDOF5.6	TraesCS4D02G063000	C1	AT1G72280	AERO1	NA
TaDOF5.6	TraesCS4B02G247000	C1	AT1G13740;AT1G69260;AT3G02140;AT3G29575	AFP2;AFP1;AFP4;AFP3	NA
TaDOF5.6	TraesCS1A02G164900	C5	AT5G08380	AGAL1	NA
TaDOF5.6	TraesCS7D02G264700	C1	AT5G13300;AT5G61980	AGD3;AGD1	NA
TaDOF5.6	TraesCS6D02G213800	C5	AT1G10870;AT1G60860	AGD4;AGD2	NA
TaDOF5.6	TraesCS3D02G090300	C2	AT1G31140	AGL63	MIKC_MADS
TaDOF5.6	TraesCS5B02G455700	C5	AT2G27880	AGO5	NA
TaDOF5.6	TraesCS5D02G192700	C5	AT2G27880	AGO5	NA
TaDOF5.6	TraesCS5D02G454200	C5	AT2G27880	AGO5	NA
TaDOF5.6	TraesCS5A02G446000	C5	AT2G27880	AGO5	NA
TaDOF5.6	TraesCS5B02G454200	C5	AT2G27880	AGO5	NA
TaDOF5.6	TraesCS5D02G169500	C2	AT2G32940	AGO6	NA
TaDOF5.6	TraesCS3B02G222700	C1	AT4G01800	AGY1	NA
TaDOF5.6	TraesCS5D02G013100	C1	AT3G60330	AHA7	NA
TaDOF5.6	TraesCS7A02G076500	C2	AT2G45430;AT3G60870;AT4G12050;AT4G22810	AHL22;AHL18;AHL26;AHL24	NA
TaDOF5.6	TraesCS6D02G258400	C1	AT1G20900;AT1G76500;AT4G35390	AHL27;AHL29;AHL25	NA
TaDOF5.6	TraesCS6A02G277700	C1	AT1G20900;AT1G76500;AT4G35390	AHL27;AHL29;AHL25	NA
TaDOF5.6	TraesCS6B02G306100	C1	AT1G20900;AT1G76500;AT4G35390	AHL27;AHL29;AHL25	NA
TaDOF5.6	TraesCS7B02G297300	C6	AT1G20900;AT1G76500;AT4G35390	AHL27;AHL29;AHL25	NA
TaDOF5.6	TraesCS7B02G215600	C2	AT4G00200	AHL7	NA
TaDOF5.6	TraesCS4B02G292900	C5	AT1G72570	AIL1	AP2
TaDOF5.6	TraesCS4A02G011600	C5	AT1G72570	AIL1	AP2
TaDOF5.6	TraesCS2B02G534000	C1	AT5G57390	AIL5	AP2
TaDOF5.6	TraesCS2A02G505600	C1	AT5G57390	AIL5	AP2
TaDOF5.6	TraesCS2D02G506500	C1	AT5G57390	AIL5	AP2
TaDOF5.6	TraesCS1A02G209400	C5	AT2G45160;AT3G60630;AT4G00150	SCL27;SCL22;SCL6	GRAS
TaDOF5.6	TraesCS1D02G155100	C2	AT2G28350;AT4G30080	ARF10;ARF16	ARF
TaDOF5.6	TraesCS1D02G162600	C5	AT4G00180	YAB3	YABBY
TaDOF5.6	TraesCS3B02G394600	C1	AT1G07430;AT2G29380;AT3G11410;AT5G59220	AIP1;HAI3;PP2CA;SAG113	NA
TaDOF5.6	TraesCS3D02G355900	C1	AT1G07430;AT2G29380;AT3G11410;AT5G59220	AIP1;HAI3;PP2CA;SAG113	NA
TaDOF5.6	TraesCS2D02G253300	C2	AT2G34680	AIR9	NA
TaDOF5.6	TraesCS2B02G272400	C2	AT2G34680	AIR9	NA
TaDOF5.6	TraesCS1D02G281800	C1	AT2G37760;AT2G37770;AT2G37790;AT3G53880	AKR4C8;AKR4C9;AKR4C10;AKR4C11	NA
TaDOF5.6	TraesCS1A02G282000	C5	AT2G37760;AT2G37770;AT2G37790;AT3G53880	AKR4C8;AKR4C9;AKR4C10;AKR4C11	NA
TaDOF5.6	TraesCS3B02G395600	C5	AT2G37760;AT2G37770;AT2G37790;AT3G53880	AKR4C8;AKR4C9;AKR4C10;AKR4C11	NA
TaDOF5.6	TraesCS3A02G233800	C5	AT2G25600;AT2G26650;AT4G32500	AKT6;AKT1;AKT5	NA
TaDOF5.6	TraesCS3B02G265500	C5	AT2G25600;AT2G26650;AT4G32500	AKT6;AKT1;AKT5	NA
TaDOF5.6	TraesCS3D02G219600	C5	AT2G25600;AT2G26650;AT4G32500	AKT6;AKT1;AKT5	NA
TaDOF5.6	TraesCS1B02G001800	C1	AT1G13210;AT1G26130;AT1G68710;AT3G25610	ALA11;AT1G26130;AT1G68710;ALA10	NA
TaDOF5.6	TraesCS7B02G033000	C6	AT1G65080;AT3G44370	ALB3L2;ALB3L3	NA
TaDOF5.6	TraesCS2D02G386700	C6	AT4G36250	ALDH3F1	NA
TaDOF5.6	TraesCS4A02G219900	C6	AT1G44170;AT4G34240	ALDH3H1;ALDH3I1	NA
TaDOF5.6	TraesCS6B02G183600	C1	AT1G79440	ALDH5F1	NA
TaDOF5.6	TraesCS6A02G155500	C6	AT1G79440	ALDH5F1	NA
TaDOF5.6	TraesCS5B02G210100	C6	AT1G54100	ALDH7B4	NA
TaDOF5.6	TraesCS5D02G218400	C6	AT1G54100	ALDH7B4	NA
TaDOF5.6	TraesCS7B02G127200	C1	AT1G18420;AT1G25480;AT1G68600;AT2G17470;AT3G18440	ALMT3;ALMT4;ALMT5;AT2G17470;ALMT9	NA
TaDOF5.6	TraesCS7A02G208700	C5	AT1G18420;AT1G25480;AT1G68600;AT2G17470;AT3G18440	ALMT3;ALMT4;ALMT5;AT2G17470;ALMT9	NA
TaDOF5.6	TraesCS3A02G528900	C6	AT2G25940;AT4G32940	ALPHA-VPE;GAMMA-VPE	NA
TaDOF5.6	TraesCS6D02G313500	C5	AT4G25000	AMY1	NA
TaDOF5.6	TraesCS3D02G248000	C5	AT1G69830	AMY3	NA
TaDOF5.6	TraesCS3B02G276700	C5	AT1G69830	AMY3	NA
TaDOF5.6	TraesCS4B02G350600	C5	AT1G65910	anac028	NAC
TaDOF5.6	TraesCS4D02G345300	C5	AT1G65910	anac028	NAC
TaDOF5.6	TraesCS6B02G451300	C1	AT3G10480;AT3G10490;AT3G10500;AT5G04410	ANAC050;ANAC052;NAC053;NAC078	NAC
TaDOF5.6	TraesCS3B02G126200	C5	AT4G29230;AT5G56620	anac075;anac099	NAC
TaDOF5.6	TraesCS3D02G109400	C5	AT4G29230;AT5G56620	anac075;anac099	NAC
TaDOF5.6	TraesCS3A02G107400	C5	AT4G29230;AT5G56620	anac075;anac099	NAC
TaDOF5.6	TraesCS5B02G104200	C5	AT5G18300	anac088	NAC
TaDOF5.6	TraesCS3B02G531500	C2	AT1G68090	ANN5	NA
TaDOF5.6	TraesCS1A02G073900	C5	AT1G68090	ANN5	NA
TaDOF5.6	TraesCS3A02G484400	C5	AT1G68090	ANN5	NA
TaDOF5.6	TraesCS4B02G195000	C5	AT2G38240;AT3G11180;AT3G55970;AT5G05600	ANS;AT3G11180;JRG21;AT5G05600	NA
TaDOF5.6	TraesCS3A02G351400	C5	AT2G38240;AT3G11180;AT3G55970;AT5G05600	ANS;AT3G11180;JRG21;AT5G05600	NA
TaDOF5.6	TraesCS3D02G345600	C5	AT2G38240;AT3G11180;AT3G55970;AT5G05600	ANS;AT3G11180;JRG21;AT5G05600	NA
TaDOF5.6	TraesCS3B02G383900	C5	AT2G38240;AT3G11180;AT3G55970;AT5G05600	ANS;AT3G11180;JRG21;AT5G05600	NA
TaDOF5.6	TraesCS1D02G212800	C5	AT2G45160;AT3G60630;AT4G00150	SCL27;SCL22;SCL6	GRAS
TaDOF5.6	TraesCS5A02G472600	C1	AT3G11900	ANT1	NA
TaDOF5.6	TraesCS5D02G485300	C1	AT3G11900	ANT1	NA
TaDOF5.6	TraesCS5B02G485400	C5	AT3G11900	ANT1	NA
TaDOF5.6	TraesCS2B02G297200	C5	AT3G11900	ANT1	NA
TaDOF5.6	TraesCS5B02G485500	C5	AT3G11900	ANT1	NA
TaDOF5.6	TraesCS1D02G332800	C6	AT2G29650	ANTR1	NA
TaDOF5.6	TraesCS6A02G099200	C1	AT5G14760	AO	NA
TaDOF5.6	TraesCS6B02G127300	C1	AT5G14760	AO	NA
TaDOF5.6	TraesCS2A02G438300	C1	AT5G64210	AOX2	NA
TaDOF5.6	TraesCS2B02G459000	C1	AT5G64210	AOX2	NA
TaDOF5.6	TraesCS2D02G436200	C1	AT5G64210	AOX2	NA
TaDOF5.6	TraesCS2A02G438200	C1	AT5G64210	AOX2	NA
TaDOF5.6	TraesCS2B02G459300	C6	AT5G64210	AOX2	NA
TaDOF5.6	TraesCS1D02G412200	C1	AT1G11910;AT1G62290;AT4G04460	APA1;APA2;APA3	NA
TaDOF5.6	TraesCS4A02G118100	C1	AT3G05870	APC11	NA
TaDOF5.6	TraesCS4A02G075000	C6	AT1G78770	APC6	NA
TaDOF5.6	TraesCS7D02G211000	C6	AT1G49050	APCB1	NA
TaDOF5.6	TraesCS3B02G192400	C1	AT5G46110	APE2	NA
TaDOF5.6	TraesCS3A02G161300	C1	AT5G46110	APE2	NA
TaDOF5.6	TraesCS4D02G259000	C1	AT2G14750;AT4G39940;AT5G67520	APK1;APK2;APK4	NA
TaDOF5.6	TraesCS6D02G145300	C1	AT1G79430	APL	G2-like
TaDOF5.6	TraesCS7D02G470000	C5	AT1G79430	APL	G2-like
TaDOF5.6	TraesCS1D02G427400	C1	AT1G27680;AT2G21590;AT4G39210	APL2;APL4;APL3	NA
TaDOF5.6	TraesCS1B02G449700	C5	AT1G27680;AT2G21590;AT4G39210	APL2;APL4;APL3	NA
TaDOF5.6	TraesCS5D02G326200	C1	AT2G46790;AT5G24470	APRR9;APRR5	NA
TaDOF5.6	TraesCS7D02G284900	C1	AT5G48300	APS1	NA
TaDOF5.6	TraesCS5D02G182600	C1	AT5G48300	APS1	NA
TaDOF5.6	TraesCS5B02G175800	C6	AT5G48300	APS1	NA
TaDOF5.6	TraesCS2A02G032500	C5	AT1G19920	APS2	NA
TaDOF5.6	TraesCS5D02G508500	C6	AT3G16810	APUM24	NA
TaDOF5.6	TraesCS5D02G508600	C6	AT3G16810	APUM24	NA
TaDOF5.6	TraesCS4A02G407800	C5	AT1G22240;AT1G35730;AT1G35750;AT1G78160;AT4G08840	APUM8;APUM9;APUM10;APUM7;APUM11	NA
TaDOF5.6	TraesCS4B02G307200	C6	AT1G22240;AT1G35730;AT1G35750;AT1G78160;AT4G08840	APUM8;APUM9;APUM10;APUM7;APUM11	NA
TaDOF5.6	TraesCS1D02G287900	C6	AT4G19180	APY7	NA
TaDOF5.6	TraesCS3A02G154600	C1	AT4G28950	ARAC7	NA
TaDOF5.6	TraesCS2A02G297400	C6	AT2G36010;AT5G22220	E2F3;E2FB	E2F/DP
TaDOF5.6	TraesCS1D02G378900	C6	AT3G25730	ARF14	RAV
TaDOF5.6	TraesCS7D02G463000	C1	AT1G77850	ARF17	ARF
TaDOF5.6	TraesCS3D02G442000	C1	AT5G62000	ARF2	ARF
TaDOF5.6	TraesCS3A02G442000	C1	AT5G62000	ARF2	ARF
TaDOF5.6	TraesCS3B02G475800	C1	AT5G62000	ARF2	ARF
TaDOF5.6	TraesCS3D02G434700	C1	AT5G62000	ARF2	ARF
TaDOF5.6	TraesCS1B02G424700	C2	AT2G33860	ARF3	ARF
TaDOF5.6	TraesCS1D02G337400	C5	AT2G33860	ARF3	ARF
TaDOF5.6	TraesCS5A02G127100	C5	AT2G36080;AT3G11580;AT5G06250	ARF31;AT3G11580;AT5G06250	B3
TaDOF5.6	TraesCS6D02G127600	C2	AT1G30330	ARF6	ARF
TaDOF5.6	TraesCS6B02G167100	C2	AT1G30330	ARF6	ARF
TaDOF5.6	TraesCS2B02G048700	C5	AT4G08870;AT4G08900	ARGAH2;ARGAH1	NA
TaDOF5.6	TraesCS7A02G311700	C6	AT1G13180	ARP3	NA
TaDOF5.6	TraesCS5B02G086900	C1	AT2G37630	AS1	MYB
TaDOF5.6	TraesCS2A02G098400	C6	AT3G10740;AT5G26120	ASD1;ASD2	NA
TaDOF5.6	TraesCS3B02G415900	C1	AT2G16570;AT4G34740;AT4G38880	ASE1;ASE2;ASE3	NA
TaDOF5.6	TraesCS1D02G269400	C6	AT2G16570;AT4G34740;AT4G38880	ASE1;ASE2;ASE3	NA
TaDOF5.6	TraesCS7A02G453700	C6	AT2G44150;AT3G59960	ASHH3;ASHH4	NA
TaDOF5.6	TraesCS7A02G364700	C6	AT2G19640	ASHR2	NA
TaDOF5.6	TraesCS1A02G270800	C1	AT1G10940;AT1G60940	ASK1;SRK2B	NA
TaDOF5.6	TraesCS6B02G026900	C5	AT2G30970	ASP1	NA
TaDOF5.6	TraesCS5D02G321200	C1	AT1G01225;AT4G00905	AT1G01225;AT4G00905	NA
TaDOF5.6	TraesCS6B02G068000	C5	AT1G01390;AT1G01420;AT4G01070	AT1G01390;UGT72B3;UGT72B1	NA
TaDOF5.6	TraesCS1A02G425200	C1	AT1G01440;AT2G46380;AT3G61670;AT4G01090	AT1G01440;AT2G46380;AT3G61670;AT4G01090	NA
TaDOF5.6	TraesCS7B02G372500	C1	AT1G01520;AT4G01280;AT5G52660	AT1G01520;RVE5;RVE6	MYB_related
TaDOF5.6	TraesCS1D02G187900	C1	AT1G01830;AT2G45720	AT1G01830;AT2G45720	NA
TaDOF5.6	TraesCS4B02G355300	C6	AT1G01830;AT2G45720	AT1G01830;AT2G45720	NA
TaDOF5.6	TraesCS7B02G149400	C1	AT1G02290	AT1G02290	NA
TaDOF5.6	TraesCS1D02G209400	C2	AT1G02610;AT4G02075	AT1G02610;PIT1	NA
TaDOF5.6	TraesCS1A02G206100	C5	AT1G02610;AT4G02075	AT1G02610;PIT1	NA
TaDOF5.6	TraesCS1B02G219700	C5	AT1G02610;AT4G02075	AT1G02610;PIT1	NA
TaDOF5.6	TraesCS3D02G179300	C1	AT1G02620	AT1G02620	NA
TaDOF5.6	TraesCS2A02G095200	C1	AT1G02650;AT2G47440;AT3G62570;AT4G02100	AT1G02650;AT2G47440;AT3G62570;AT4G02100	NA
TaDOF5.6	TraesCS1D02G233100	C5	AT1G02870	AT1G02870	NA
TaDOF5.6	TraesCS4B02G365500	C6	AT1G03100	AT1G03100	NA
TaDOF5.6	TraesCS1B02G263500	C2	AT1G03440;AT4G03010	AT1G03440;AT4G03010	NA
TaDOF5.6	TraesCS4A02G235500	C5	AT1G04420	AT1G04420	NA
TaDOF5.6	TraesCS3D02G076300	C1	AT1G04570;AT2G33280	AT1G04570;AT2G33280	NA
TaDOF5.6	TraesCS2D02G018000	C2	AT1G04680;AT3G07010;AT3G24230;AT3G24670;AT4G13210;AT4G13710;AT5G48900	AT1G04680;AT3G07010;AT3G24230;AT3G24670;AT4G13210;AT4G13710;AT5G48900	NA
TaDOF5.6	TraesCS1B02G337400	C6	AT1G04770	AT1G04770	NA
TaDOF5.6	TraesCS7B02G073200	C5	AT1G05000;AT2G32960;AT4G03960	AT1G05000;DSP2;DSP4	NA
TaDOF5.6	TraesCS5B02G416000	C5	AT1G05070;AT2G32580;AT4G04360	AT1G05070;AT2G32580;AT4G04360	NA
TaDOF5.6	TraesCS5A02G385200	C2	AT1G05440	AT1G05440	NA
TaDOF5.6	TraesCS5B02G390200	C2	AT1G05440	AT1G05440	NA
TaDOF5.6	TraesCS5D02G395200	C2	AT1G05440	AT1G05440	NA
TaDOF5.6	TraesCS2D02G347200	C5	AT1G05710;AT2G31730	AT1G05710;BHLH154	NA
TaDOF5.6	TraesCS6B02G244500	C5	AT1G05785	AT1G05785	NA
TaDOF5.6	TraesCS4B02G082100	C1	AT1G05870;AT2G31560	AT1G05870;AT2G31560	NA
TaDOF5.6	TraesCS4D02G080600	C1	AT1G05870;AT2G31560	AT1G05870;AT2G31560	NA
TaDOF5.6	TraesCS3B02G429000	C5	AT1G05870;AT2G31560	AT1G05870;AT2G31560	NA
TaDOF5.6	TraesCS5D02G293800	C1	AT1G06020;AT1G06030;AT1G50390;AT2G31390;AT3G59480	AT1G06020;AT1G06030;AT1G50390;AT2G31390;AT3G59480	NA
TaDOF5.6	TraesCS5A02G286200	C1	AT1G06020;AT1G06030;AT1G50390;AT2G31390;AT3G59480	AT1G06020;AT1G06030;AT1G50390;AT2G31390;AT3G59480	NA
TaDOF5.6	TraesCS5B02G285500	C2	AT1G06020;AT1G06030;AT1G50390;AT2G31390;AT3G59480	AT1G06020;AT1G06030;AT1G50390;AT2G31390;AT3G59480	NA
TaDOF5.6	TraesCS3D02G146500	C1	AT1G06240	AT1G06240	NA
TaDOF5.6	TraesCS5D02G173500	C5	AT1G06380;AT2G42650;AT3G58660	AT1G06380;AT2G42650;AT3G58660	NA
TaDOF5.6	TraesCS3D02G289300	C6	AT1G06470	AT1G06470	NA
TaDOF5.6	TraesCS5D02G419500	C5	AT1G06790	AT1G06790	NA
TaDOF5.6	TraesCS4B02G169500	C2	AT1G06900;AT5G01440	AT1G06900;AT5G01440	NA
TaDOF5.6	TraesCS4B02G190300	C5	AT1G07025;AT1G07030;AT2G30160	AT1G07025;AT1G07030;AT2G30160	NA
TaDOF5.6	TraesCS4B02G194000	C1	AT1G07160;AT2G05050;AT2G30020;AT2G40180;AT3G27140;AT4G08260	AT1G07160;AT2G05050;AT2G30020;PP2C5;AT3G27140;AT4G08260	NA
TaDOF5.6	TraesCS2A02G087100	C6	AT1G07160;AT2G05050;AT2G30020;AT2G40180;AT3G27140;AT4G08260	AT1G07160;AT2G05050;AT2G30020;PP2C5;AT3G27140;AT4G08260	NA
TaDOF5.6	TraesCS1B02G117800	C5	AT1G07220	AT1G07220	NA
TaDOF5.6	TraesCS5A02G186500	C1	AT1G07650	AT1G07650	NA
TaDOF5.6	TraesCS5A02G353600	C2	AT1G07820	AT1G07820	NA
TaDOF5.6	TraesCS5D02G360900	C2	AT1G07820	AT1G07820	NA
TaDOF5.6	TraesCS2A02G081400	C1	AT1G07870;AT2G28590;AT5G02800	AT1G07870;PBL6;PBL7	NA
TaDOF5.6	TraesCS2B02G096000	C1	AT1G07870;AT2G28590;AT5G02800	AT1G07870;PBL6;PBL7	NA
TaDOF5.6	TraesCS2D02G079200	C1	AT1G07870;AT2G28590;AT5G02800	AT1G07870;PBL6;PBL7	NA
TaDOF5.6	TraesCS3A02G319800	C5	AT1G08210;AT2G36670;AT3G42550;AT5G22850	AT1G08210;AT2G36670;AT3G42550;AT5G22850	NA
TaDOF5.6	TraesCS5B02G303400	C1	AT1G08760	AT1G08760	NA
TaDOF5.6	TraesCS7D02G268500	C2	AT1G08760	AT1G08760	NA
TaDOF5.6	TraesCS2A02G093700	C2	AT1G09160	AT1G09160	NA
TaDOF5.6	TraesCS5B02G099000	C1	AT1G09170;AT2G47500;AT5G27000	AT1G09170;KIN14I;KIN14G	NA
TaDOF5.6	TraesCS5D02G105200	C1	AT1G09170;AT2G47500;AT5G27000	AT1G09170;KIN14I;KIN14G	NA
TaDOF5.6	TraesCS5A02G092900	C1	AT1G09170;AT2G47500;AT5G27000	AT1G09170;KIN14I;KIN14G	NA
TaDOF5.6	TraesCS4A02G117700	C5	AT1G09170;AT2G47500;AT5G27000	AT1G09170;KIN14I;KIN14G	NA
TaDOF5.6	TraesCS1D02G054200	C5	AT1G09390;AT1G56670;AT3G62280	AT1G09390;LIP4;AT3G62280	NA
TaDOF5.6	TraesCS1A02G105800	C5	AT1G09390;AT1G56670;AT3G62280	AT1G09390;LIP4;AT3G62280	NA
TaDOF5.6	TraesCS1A02G052300	C5	AT1G09390;AT1G56670;AT3G62280	AT1G09390;LIP4;AT3G62280	NA
TaDOF5.6	TraesCS1B02G069200	C5	AT1G09390;AT1G56670;AT3G62280	AT1G09390;LIP4;AT3G62280	NA
TaDOF5.6	TraesCS1A02G105900	C5	AT1G09390;AT1G56670;AT3G62280	AT1G09390;LIP4;AT3G62280	NA
TaDOF5.6	TraesCS1B02G128600	C5	AT1G09390;AT1G56670;AT3G62280	AT1G09390;LIP4;AT3G62280	NA
TaDOF5.6	TraesCS1D02G109100	C5	AT1G09390;AT1G56670;AT3G62280	AT1G09390;LIP4;AT3G62280	NA
TaDOF5.6	TraesCS1D02G109200	C5	AT1G09390;AT1G56670;AT3G62280	AT1G09390;LIP4;AT3G62280	NA
TaDOF5.6	TraesCS2A02G311200	C6	AT1G09400;AT1G17990;AT1G18020;AT1G76680;AT1G76690	AT1G09400;AT1G17990;AT1G18020;OPR1;OPR2	NA
TaDOF5.6	TraesCS1B02G273400	C5	AT1G09645;AT1G57765	AT1G09645;AT1G57765	NA
TaDOF5.6	TraesCS1D02G262800	C5	AT1G09645;AT1G57765	AT1G09645;AT1G57765	NA
TaDOF5.6	TraesCS3A02G404200	C5	AT1G09660	AT1G09660	NA
TaDOF5.6	TraesCS3B02G437700	C5	AT1G09660	AT1G09660	NA
TaDOF5.6	TraesCS5A02G473400	C1	AT1G09870	AT1G09870	NA
TaDOF5.6	TraesCS4B02G158100	C6	AT1G09920	AT1G09920	NA
TaDOF5.6	TraesCS4D02G164000	C6	AT1G09920	AT1G09920	NA
TaDOF5.6	TraesCS2D02G041000	C5	AT1G09932;AT1G09935;AT5G64460	AT1G09932;AT1G09935;AT5G64460	NA
TaDOF5.6	TraesCS5D02G148300	C6	AT1G10040	AT1G10040	NA
TaDOF5.6	TraesCS2D02G124900	C1	AT1G10050;AT1G58370;AT4G08160	AT1G10050;RXF12;XYN3	NA
TaDOF5.6	TraesCS5B02G010800	C5	AT1G10090;AT1G58520	AT1G10090;RXW8	NA
TaDOF5.6	TraesCS5D02G018000	C5	AT1G10090;AT1G58520	AT1G10090;RXW8	NA
TaDOF5.6	TraesCS4B02G032500	C1	AT1G10410;AT1G59650	AT1G10410;CW14	NA
TaDOF5.6	TraesCS2D02G273600	C6	AT1G10810;AT1G60680;AT1G60690;AT1G60710;AT1G60730;AT1G60750	AT1G10810;AGD2;AT1G60690;ATB2;AT1G60730;AT1G60750	NA
TaDOF5.6	TraesCS2B02G581700	C5	AT1G10820;AT1G60670;AT1G68160	AT1G10820;AT1G60670;AT1G68160	NA
TaDOF5.6	TraesCS5B02G306400	C6	AT1G10865	AT1G10865	NA
TaDOF5.6	TraesCS3A02G386400	C1	AT1G11040;AT1G44160	AT1G11040;AT1G44160	NA
TaDOF5.6	TraesCS3B02G418500	C1	AT1G11040;AT1G44160	AT1G11040;AT1G44160	NA
TaDOF5.6	TraesCS2A02G357600	C5	AT1G11200;AT4G21570	AT1G11200;AT4G21570	NA
TaDOF5.6	TraesCS7B02G464800	C1	AT1G11320	AT1G11320	NA
TaDOF5.6	TraesCS7D02G528400	C1	AT1G11320	AT1G11320	NA
TaDOF5.6	TraesCS2B02G235700	C1	AT1G11380	AT1G11380	NA
TaDOF5.6	TraesCS2D02G209300	C6	AT1G11390;AT1G61640	AT1G11390;AT1G61640	NA
TaDOF5.6	TraesCS2B02G239800	C1	AT1G11500;AT2G32280;AT4G21310	AT1G11500;AT2G32280;AT4G21310	NA
TaDOF5.6	TraesCS2D02G220600	C1	AT1G11500;AT2G32280;AT4G21310	AT1G11500;AT2G32280;AT4G21310	NA
TaDOF5.6	TraesCS3A02G326500	C6	AT1G11630;AT1G61870	AT1G11630;PPR336	NA
TaDOF5.6	TraesCS4A02G222400	C2	AT1G11710	AT1G11710	NA
TaDOF5.6	TraesCS2B02G274900	C5	AT1G11820	AT1G11820	NA
TaDOF5.6	TraesCS2D02G230900	C5	AT1G11820	AT1G11820	NA
TaDOF5.6	TraesCS2A02G224900	C5	AT1G11820	AT1G11820	NA
TaDOF5.6	TraesCS2B02G490900	C1	AT1G11860	AT1G11860	NA
TaDOF5.6	TraesCS7A02G336100	C5	AT1G11905;AT5G42570	AT1G11905;AT5G42570	NA
TaDOF5.6	TraesCS1A02G090600	C5	AT1G11930	AT1G11930	NA
TaDOF5.6	TraesCS5D02G208700	C1	AT1G11950;AT1G62310	AT1G11950;AT1G62310	NA
TaDOF5.6	TraesCS5A02G202300	C1	AT1G11950;AT1G62310	AT1G11950;AT1G62310	NA
TaDOF5.6	TraesCS5B02G200900	C1	AT1G11950;AT1G62310	AT1G11950;AT1G62310	NA
TaDOF5.6	TraesCS1D02G035600	C2	AT1G11960;AT1G62320;AT3G21620;AT4G04340;AT4G15430;AT4G22120	AT1G11960;AT1G62320;AT3G21620;OSCA1;AT4G15430;CSC1	NA
TaDOF5.6	TraesCS1D02G213300	C1	AT1G12100	AT1G12100	NA
TaDOF5.6	TraesCS1A02G210000	C1	AT1G12100	AT1G12100	NA
TaDOF5.6	TraesCS7D02G297600	C1	AT1G12230	AT1G12230	NA
TaDOF5.6	TraesCS2D02G183600	C6	AT1G12730;AT1G63110	AT1G12730;AT1G63110	NA
TaDOF5.6	TraesCS6B02G238000	C1	AT1G12990;AT1G67880;AT3G01620;AT3G26445;AT3G27540;AT5G14480	AT1G12990;AT1G67880;AT3G01620;AT3G26445;AT3G27540;AT5G14480	NA
TaDOF5.6	TraesCS3B02G423300	C1	AT1G13195;AT1G24440	AT1G13195;AT1G24440	NA
TaDOF5.6	TraesCS3D02G384200	C1	AT1G13195;AT1G24440	AT1G13195;AT1G24440	NA
TaDOF5.6	TraesCS7D02G345300	C5	AT1G13380	AT1G13380	NA
TaDOF5.6	TraesCS7A02G338100	C6	AT1G13380	AT1G13380	NA
TaDOF5.6	TraesCS2A02G176100	C5	AT1G13730;AT1G69250;AT2G03640;AT3G55540;AT5G60980	AT1G13730;AT1G69250;AT2G03640;AT3G55540;AT5G60980	NA
TaDOF5.6	TraesCS3A02G398600	C6	AT1G13730;AT1G69250;AT2G03640;AT3G55540;AT5G60980	AT1G13730;AT1G69250;AT2G03640;AT3G55540;AT5G60980	NA
TaDOF5.6	TraesCS3D02G392700	C6	AT1G13730;AT1G69250;AT2G03640;AT3G55540;AT5G60980	AT1G13730;AT1G69250;AT2G03640;AT3G55540;AT5G60980	NA
TaDOF5.6	TraesCS3D02G290800	C6	AT1G13780;AT1G16930;AT1G16940;AT1G19070;AT1G51370;AT1G60400;AT1G60410;AT1G66290;AT1G66300;AT1G66310;AT1G66320;AT1G66640;AT1G69630;AT1G78730;AT1G78740;AT1G78750;AT1G78760;AT1G78840;AT1G80470;AT2G26030;AT2G27505;AT3G19085;AT3G23955;AT3G60710;AT4G13985;AT5G18770;AT5G18780;AT5G22600;AT5G22610;AT5G22660;AT5G22670;AT5G22700;AT5G22720;AT5G22730;AT5G25850;AT5G27750;AT5G44490;AT5G44940;AT5G44950;AT5G44960…	AT1G13780;AT1G16930;AT1G16940;AT1G19070;AT1G51370;AT1G60400;AT1G60410;AT1G66290;AT1G66300;AT1G66310;AT1G66320;AT1G66640;FBL13;AT1G78730;AT1G78740;AT1G78750;AT1G78760;AT1G78840;AT1G80470;AT2G26030;AT2G27505;AT3G19085;AT3G23955;AT3G60710;FBD1;AT5G18770;AT5G18780;AT5G22600;AT5G22610;AT5G22660;AT5G22670;AT5G22700;AT5G22720;AT5G22730;AT5G25850;AT5G27750;AT5G44490;AT5G44940;AT5G44950;AT5G44960;AT5G4497…	NA
TaDOF5.6	TraesCS3A02G291000	C6	AT1G13780;AT1G16930;AT1G16940;AT1G19070;AT1G51370;AT1G60400;AT1G60410;AT1G66290;AT1G66300;AT1G66310;AT1G66320;AT1G66640;AT1G69630;AT1G78730;AT1G78740;AT1G78750;AT1G78760;AT1G78840;AT1G80470;AT2G26030;AT2G27505;AT3G19085;AT3G23955;AT3G60710;AT4G13985;AT5G18770;AT5G18780;AT5G22600;AT5G22610;AT5G22660;AT5G22670;AT5G22700;AT5G22720;AT5G22730;AT5G25850;AT5G27750;AT5G44490;AT5G44940;AT5G44950;AT5G44960…	AT1G13780;AT1G16930;AT1G16940;AT1G19070;AT1G51370;AT1G60400;AT1G60410;AT1G66290;AT1G66300;AT1G66310;AT1G66320;AT1G66640;FBL13;AT1G78730;AT1G78740;AT1G78750;AT1G78760;AT1G78840;AT1G80470;AT2G26030;AT2G27505;AT3G19085;AT3G23955;AT3G60710;FBD1;AT5G18770;AT5G18780;AT5G22600;AT5G22610;AT5G22660;AT5G22670;AT5G22700;AT5G22720;AT5G22730;AT5G25850;AT5G27750;AT5G44490;AT5G44940;AT5G44950;AT5G44960;AT5G4497…	NA
TaDOF5.6	TraesCS2D02G185300	C1	AT1G13820;AT5G39220	AT1G13820;AT5G39220	NA
TaDOF5.6	TraesCS2B02G204700	C5	AT1G13830;AT1G18650;AT1G26450;AT1G69295;AT2G03505;AT5G08000;AT5G61130	AT1G13830;PDCB3;AT1G26450;PDCB4;AT2G03505;E13L3;PDCB1	NA
TaDOF5.6	TraesCS2D02G185800	C5	AT1G13830;AT1G18650;AT1G26450;AT1G69295;AT2G03505;AT5G08000;AT5G61130	AT1G13830;PDCB3;AT1G26450;PDCB4;AT2G03505;E13L3;PDCB1	NA
TaDOF5.6	TraesCS1B02G346200	C5	AT1G13830;AT1G18650;AT1G26450;AT1G69295;AT2G03505;AT5G08000;AT5G61130	AT1G13830;PDCB3;AT1G26450;PDCB4;AT2G03505;E13L3;PDCB1	NA
TaDOF5.6	TraesCS1A02G332500	C5	AT1G13830;AT1G18650;AT1G26450;AT1G69295;AT2G03505;AT5G08000;AT5G61130	AT1G13830;PDCB3;AT1G26450;PDCB4;AT2G03505;E13L3;PDCB1	NA
TaDOF5.6	TraesCS5D02G088800	C1	AT1G13970;AT3G29180;AT5G39430	AT1G13970;AT3G29180;AT5G39430	NA
TaDOF5.6	TraesCS5A02G075300	C1	AT1G13970;AT3G29180;AT5G39430	AT1G13970;AT3G29180;AT5G39430	NA
TaDOF5.6	TraesCS6B02G225200	C5	AT1G14120;AT1G14130	AT1G14120;AT1G14130	NA
TaDOF5.6	TraesCS4D02G160700	C1	AT1G14170;AT2G03110	AT1G14170;AT2G03110	NA
TaDOF5.6	TraesCS5A02G167100	C1	AT1G14200	AT1G14200	NA
TaDOF5.6	TraesCS7A02G043900	C1	AT1G14310	AT1G14310	NA
TaDOF5.6	TraesCS7D02G039600	C5	AT1G14310	AT1G14310	NA
TaDOF5.6	TraesCS2A02G403200	C5	AT1G14580;AT2G02070;AT2G02080	AT1G14580;IDD5;IDD4	C2H2
TaDOF5.6	TraesCS2B02G421100	C5	AT1G14580;AT2G02070;AT2G02080	AT1G14580;IDD5;IDD4	C2H2
TaDOF5.6	TraesCS5A02G398300	C5	AT1G14810	AT1G14810	NA
TaDOF5.6	TraesCS1B02G388800	C1	AT1G14910;AT2G01600	AT1G14910;AT2G01600	NA
TaDOF5.6	TraesCS3A02G258900	C2	AT1G14910;AT2G01600	AT1G14910;AT2G01600	NA
TaDOF5.6	TraesCS1A02G381500	C2	AT1G15110	AT1G15110	NA
TaDOF5.6	TraesCS1B02G371100	C1	AT1G15280;AT1G80000	AT1G15280;MLN51	NA
TaDOF5.6	TraesCS1A02G352000	C1	AT1G15280;AT1G80000	AT1G15280;MLN51	NA
TaDOF5.6	TraesCS3D02G219700	C1	AT1G15490;AT1G52750;AT1G80280	AT1G15490;AT1G52750;AT1G80280	NA
TaDOF5.6	TraesCS3A02G233700	C2	AT1G15490;AT1G52750;AT1G80280	AT1G15490;AT1G52750;AT1G80280	NA
TaDOF5.6	TraesCS6A02G346000	C5	AT1G15590	AT1G15590	NA
TaDOF5.6	TraesCS7D02G282200	C6	AT1G15860	AT1G15860	NA
TaDOF5.6	TraesCS7A02G284300	C6	AT1G15860	AT1G15860	NA
TaDOF5.6	TraesCS7A02G568800	C5	AT1G16080	AT1G16080	NA
TaDOF5.6	TraesCS4B02G016300	C2	AT1G16520;AT1G56080	AT1G16520;AT1G56080	NA
TaDOF5.6	TraesCS5A02G045300	C6	AT1G16680;AT1G79030	AT1G16680;AT1G79030	NA
TaDOF5.6	TraesCS1B02G174500	C6	AT1G16870	AT1G16870	NA
TaDOF5.6	TraesCS3D02G149000	C1	AT1G17100;AT1G78450	AT1G17100;AT1G78450	NA
TaDOF5.6	TraesCS3D02G242400	C1	AT1G17160	AT1G17160	NA
TaDOF5.6	TraesCS4B02G294000	C1	AT1G17430;AT1G72620	AT1G17430;AT1G72620	NA
TaDOF5.6	TraesCS3A02G104600	C1	AT1G17620;AT5G11890	AT1G17620;AT5G11890	NA
TaDOF5.6	TraesCS3B02G123100	C1	AT1G17620;AT5G11890	AT1G17620;AT5G11890	NA
TaDOF5.6	TraesCS6A02G412100	C1	AT1G17820;AT1G73200	AT1G17820;AT1G73200	NA
TaDOF5.6	TraesCS6B02G460100	C1	AT1G17820;AT1G73200	AT1G17820;AT1G73200	NA
TaDOF5.6	TraesCS6B02G170100	C6	AT1G17820;AT1G73200	AT1G17820;AT1G73200	NA
TaDOF5.6	TraesCS3A02G260500	C2	AT1G17970;AT1G36950;AT1G73760;AT4G00070	AT1G17970;AT1G36950;AT1G73760;AT4G00070	NA
TaDOF5.6	TraesCS2A02G036400	C5	AT1G18000;AT1G18010	AT1G18000;AT1G18010	NA
TaDOF5.6	TraesCS5D02G205100	C1	AT1G18310;AT5G15870	AT1G18310;AT5G15870	NA
TaDOF5.6	TraesCS3D02G045200	C5	AT1G18390;AT1G25390;AT1G66880;AT5G38210	AT1G18390;LRK10L-1.1;AT1G66880;AT5G38210	NA
TaDOF5.6	TraesCS6B02G215900	C6	AT1G18410;AT1G63640;AT1G73860;AT5G41310	AT1G18410;AT1G63640;KIN14P;AT5G41310	NA
TaDOF5.6	TraesCS2A02G261000	C1	AT1G18620;AT1G74160;AT3G02170;AT5G15580	AT1G18620;AT1G74160;LNG2;LNG1	NA
TaDOF5.6	TraesCS2B02G281200	C1	AT1G18620;AT1G74160;AT3G02170;AT5G15580	AT1G18620;AT1G74160;LNG2;LNG1	NA
TaDOF5.6	TraesCS2A02G176000	C2	AT1G18620;AT1G74160;AT3G02170;AT5G15580	AT1G18620;AT1G74160;LNG2;LNG1	NA
TaDOF5.6	TraesCS6D02G218200	C5	AT1G18680	AT1G18680	NA
TaDOF5.6	TraesCS5B02G003600	C5	AT1G18940;AT1G74780;AT2G34350;AT2G34355	AT1G18940;AT1G74780;AT2G34350;AT2G34355	NA
TaDOF5.6	TraesCS4A02G290600	C1	AT1G19310;AT2G23780	AT1G19310;AT2G23780	NA
TaDOF5.6	TraesCS5D02G418900	C1	AT1G19400;AT1G75180	AT1G19400;AT1G75180	NA
TaDOF5.6	TraesCS5B02G413800	C1	AT1G19400;AT1G75180	AT1G19400;AT1G75180	NA
TaDOF5.6	TraesCS4B02G339700	C1	AT1G19450;AT1G75220	AT1G19450;AT1G75220	NA
TaDOF5.6	TraesCS1D02G426000	C5	AT1G19450;AT1G75220	AT1G19450;AT1G75220	NA
TaDOF5.6	TraesCS7D02G072600	C5	AT1G19830;AT1G75580;AT2G16580;AT2G18010;AT2G21220;AT4G34760;AT4G36110;AT4G38860	AT1G19830;AT1G75580;AT2G16580;SAUR10;AT2G21220;SAUR50;AT4G36110;AT4G38860	NA
TaDOF5.6	TraesCS2A02G492400	C2	AT1G19880	AT1G19880	NA
TaDOF5.6	TraesCS5A02G323400	C6	AT1G19970;AT1G75760;AT2G21190;AT4G38790	AT1G19970;AT1G75760;AT2G21190;AT4G38790	NA
TaDOF5.6	TraesCS5B02G485700	C1	AT1G20030;AT1G75800;AT2G17860;AT4G18253;AT4G36010;AT4G38670	AT1G20030;AT1G75800;AT2G17860;AT4G18253;AT4G36010;AT4G38670	NA
TaDOF5.6	TraesCS6A02G252800	C6	AT1G20370;AT1G76120	AT1G20370;AT1G76120	NA
TaDOF5.6	TraesCS6D02G234300	C6	AT1G20370;AT1G76120	AT1G20370;AT1G76120	NA
TaDOF5.6	TraesCS5B02G348100	C1	AT1G20530;AT2G17110;AT4G35240	AT1G20530;AT2G17110;AT4G35240	NA
TaDOF5.6	TraesCS5D02G353500	C1	AT1G20530;AT2G17110;AT4G35240	AT1G20530;AT2G17110;AT4G35240	NA
TaDOF5.6	TraesCS6A02G253600	C5	AT1G20530;AT2G17110;AT4G35240	AT1G20530;AT2G17110;AT4G35240	NA
TaDOF5.6	TraesCS6D02G235200	C5	AT1G20530;AT2G17110;AT4G35240	AT1G20530;AT2G17110;AT4G35240	NA
TaDOF5.6	TraesCS5A02G352700	C2	AT1G20720;AT1G20750	AT1G20720;AT1G20750	NA
TaDOF5.6	TraesCS7D02G180800	C2	AT1G20880;AT1G76460	AT1G20880;AT1G76460	NA
TaDOF5.6	TraesCS7A02G394800	C1	AT1G21000;AT1G43000;AT1G76590	AT1G21000;AT1G43000;AT1G76590	NA
TaDOF5.6	TraesCS5B02G271400	C1	AT1G21060;AT1G43020;AT1G76620	AT1G21060;AT1G43020;AT1G76620	NA
TaDOF5.6	TraesCS5A02G271100	C5	AT1G21060;AT1G43020;AT1G76620	AT1G21060;AT1G43020;AT1G76620	NA
TaDOF5.6	TraesCS7B02G443200	C5	AT1G21065	AT1G21065	NA
TaDOF5.6	TraesCS5A02G124200	C6	AT1G21200;AT1G76870	AT1G21200;AT1G76870	Trihelix
TaDOF5.6	TraesCS5D02G132100	C6	AT1G21200;AT1G76870	AT1G21200;AT1G76870	Trihelix
TaDOF5.6	TraesCS5B02G121400	C5	AT1G21400;AT5G09300;AT5G34780	AT1G21400;AT5G09300;KPR	NA
TaDOF5.6	TraesCS4A02G221700	C5	AT1G21590;AT1G77280;AT5G63940	AT1G21590;AT1G77280;AT5G63940	NA
TaDOF5.6	TraesCS4D02G096100	C5	AT1G21590;AT1G77280;AT5G63940	AT1G21590;AT1G77280;AT5G63940	NA
TaDOF5.6	TraesCS4B02G324500	C1	AT1G21630	AT1G21630	NA
TaDOF5.6	TraesCS4D02G321600	C1	AT1G21630	AT1G21630	NA
TaDOF5.6	TraesCS1D02G265000	C2	AT1G21740;AT1G77500;AT5G54480	AT1G21740;AT1G77500;AT5G54480	NA
TaDOF5.6	TraesCS7B02G225400	C2	AT1G22030;AT1G77855	AT1G22030;AT1G77855	NA
TaDOF5.6	TraesCS2A02G497700	C1	AT1G22100;AT1G58643;AT1G58936;AT1G59312;AT5G42810	AT1G22100;AT1G58643;AT1G58936;AT1G59312;IPK1	NA
TaDOF5.6	TraesCS1D02G195600	C6	AT1G22140	AT1G22140	NA
TaDOF5.6	TraesCS6B02G331400	C1	AT1G22180;AT4G08690	AT1G22180;AT4G08690	NA
TaDOF5.6	TraesCS1A02G307800	C1	AT1G22220;AT1G78100	AT1G22220;AT1G78100	NA
TaDOF5.6	TraesCS4B02G305700	C5	AT1G22430;AT1G22440;AT4G22110	AT1G22430;AT1G22440;AT4G22110	NA
TaDOF5.6	TraesCS4A02G352200	C1	AT1G22510;AT1G72175;AT4G33940	AT1G22510;AT1G72175;AT4G33940	NA
TaDOF5.6	TraesCS5D02G518700	C1	AT1G22510;AT1G72175;AT4G33940	AT1G22510;AT1G72175;AT4G33940	NA
TaDOF5.6	TraesCS2A02G557900	C5	AT1G22610	AT1G22610	NA
TaDOF5.6	TraesCS5D02G130400	C6	AT1G22660	AT1G22660	NA
TaDOF5.6	TraesCS5D02G136000	C6	AT1G22960	AT1G22960	NA
TaDOF5.6	TraesCS6B02G392700	C2	AT1G23070	AT1G23070	NA
TaDOF5.6	TraesCS3B02G039900	C1	AT1G23170;AT1G70770;AT3G11880	AT1G23170;AT1G70770;AT3G11880	NA
TaDOF5.6	TraesCS6D02G275800	C2	AT1G23220	AT1G23220	NA
TaDOF5.6	TraesCS6A02G021200	C5	AT1G23465;AT1G29960;AT1G53530	AT1G23465;AT1G29960;AT1G53530	NA
TaDOF5.6	TraesCS3B02G003800	C2	AT1G23790;AT1G70340	AT1G23790;AT1G70340	NA
TaDOF5.6	TraesCS6B02G322100	C5	AT1G23880;AT1G70280	AT1G23880;AT1G70280	NA
TaDOF5.6	TraesCS2D02G278000	C1	AT1G24360	AT1G24360	NA
TaDOF5.6	TraesCS2A02G324000	C5	AT1G24530	AT1G24530	NA
TaDOF5.6	TraesCS2D02G338900	C6	AT1G24530	AT1G24530	NA
TaDOF5.6	TraesCS7A02G211000	C6	AT1G26170	AT1G26170	NA
TaDOF5.6	TraesCS5D02G429900	C6	AT1G26850	AT1G26850	NA
TaDOF5.6	TraesCS6A02G106400	C6	AT1G27330;AT1G27350	AT1G27330;AT1G27350	NA
TaDOF5.6	TraesCS4B02G145200	C6	AT1G27330;AT1G27350	AT1G27330;AT1G27350	NA
TaDOF5.6	TraesCS6A02G210700	C5	AT1G27435	AT1G27435	NA
TaDOF5.6	TraesCS6D02G193800	C5	AT1G27435	AT1G27435	NA
TaDOF5.6	TraesCS4A02G249300	C6	AT1G27470;AT4G07410	AT1G27470;PCN	NA
TaDOF5.6	TraesCS4D02G076200	C2	AT1G27690;AT1G49840;AT3G19540	AT1G27690;AT1G49840;AT3G19540	NA
TaDOF5.6	TraesCS3D02G492500	C5	AT1G27930;AT1G67330	AT1G27930;AT1G67330	NA
TaDOF5.6	TraesCS1D02G354900	C1	AT1G28240;AT1G53040	AT1G28240;AT1G53040	NA
TaDOF5.6	TraesCS1A02G339800	C6	AT1G28240;AT1G53040	AT1G28240;AT1G53040	NA
TaDOF5.6	TraesCS7A02G304700	C6	AT1G28350;AT2G33840	AT1G28350;AT2G33840	NA
TaDOF5.6	TraesCS3D02G236000	C5	AT1G28570;AT1G28580;AT1G28590;AT1G28600;AT1G28610;AT1G28640;AT1G28650;AT1G28660;AT1G28670;AT1G31550;AT2G27360	AT1G28570;AT1G28580;AT1G28590;AT1G28600;AT1G28610;AT1G28640;AT1G28650;AT1G28660;ARAB-1;AT1G31550;AT2G27360	NA
TaDOF5.6	TraesCS3B02G264800	C5	AT1G28570;AT1G28580;AT1G28590;AT1G28600;AT1G28610;AT1G28640;AT1G28650;AT1G28660;AT1G28670;AT1G31550;AT2G27360	AT1G28570;AT1G28580;AT1G28590;AT1G28600;AT1G28610;AT1G28640;AT1G28650;AT1G28660;ARAB-1;AT1G31550;AT2G27360	NA
TaDOF5.6	TraesCS3A02G220000	C1	AT1G29040	AT1G29040	NA
TaDOF5.6	TraesCS3B02G250400	C5	AT1G29040	AT1G29040	NA
TaDOF5.6	TraesCS3D02G232600	C5	AT1G29040	AT1G29040	NA
TaDOF5.6	TraesCS3A02G215500	C2	AT1G29820;AT1G29830	AT1G29820;AT1G29830	NA
TaDOF5.6	TraesCS3A02G241600	C6	AT1G29820;AT1G29830	AT1G29820;AT1G29830	NA
TaDOF5.6	TraesCS3D02G241800	C6	AT1G29820;AT1G29830	AT1G29820;AT1G29830	NA
TaDOF5.6	TraesCS1D02G363900	C1	AT1G29840;AT2G19550;AT3G47560;AT3G47590;AT5G11910	AT1G29840;AT2G19550;AT3G47560;AT3G47590;AT5G11910	NA
TaDOF5.6	TraesCS1D02G428700	C5	AT1G29890;AT2G34410;AT5G46340	AT1G29890;RWA3;RWA1	NA
TaDOF5.6	TraesCS1A02G420800	C5	AT1G29890;AT2G34410;AT5G46340	AT1G29890;RWA3;RWA1	NA
TaDOF5.6	TraesCS3A02G294300	C1	AT1G29980;AT2G34510	AT1G29980;AT2G34510	NA
TaDOF5.6	TraesCS3D02G294300	C1	AT1G30070	AT1G30070	NA
TaDOF5.6	TraesCS5D02G360300	C6	AT1G30290	AT1G30290	NA
TaDOF5.6	TraesCS5D02G051100	C2	AT1G30440	AT1G30440	NA
TaDOF5.6	TraesCS7A02G309700	C6	AT1G30440	AT1G30440	NA
TaDOF5.6	TraesCS7B02G209700	C6	AT1G30440	AT1G30440	NA
TaDOF5.6	TraesCS7D02G306400	C6	AT1G30440	AT1G30440	NA
TaDOF5.6	TraesCS5A02G050100	C2	AT1G30640	AT1G30640	NA
TaDOF5.6	TraesCS2B02G421700	C5	AT1G31050	AT1G31050	NA
TaDOF5.6	TraesCS4A02G387600	C6	AT1G31450;AT1G64830;AT2G28010;AT2G28030;AT2G28040;AT2G28220;AT2G28225;AT2G35615;AT5G33340	AT1G31450;AT1G64830;AT2G28010;AT2G28030;AT2G28040;AT2G28220;AT2G28225;AT2G35615;CDR1	NA
TaDOF5.6	TraesCS7A02G106000	C5	AT1G31490	AT1G31490	NA
TaDOF5.6	TraesCS1A02G243100	C5	AT1G31500;AT1G31530	AT1G31500;AT1G31530	NA
TaDOF5.6	TraesCS1D02G243100	C5	AT1G31500;AT1G31530	AT1G31500;AT1G31530	NA
TaDOF5.6	TraesCS1B02G254600	C6	AT1G31500;AT1G31530	AT1G31500;AT1G31530	NA
TaDOF5.6	TraesCS2D02G433200	C5	AT1G31600	AT1G31600	NA
TaDOF5.6	TraesCS6D02G244000	C1	AT1G31720;AT4G19370	AT1G31720;AT4G19370	NA
TaDOF5.6	TraesCS6A02G271100	C5	AT1G31720;AT4G19370	AT1G31720;AT4G19370	NA
TaDOF5.6	TraesCS3D02G340900	C5	AT1G31950;AT1G33750;AT1G48800;AT1G48820;AT1G66020;AT1G70080;AT2G23230;AT2G37140;AT3G14490;AT3G14520;AT3G14540;AT3G29110;AT3G29190;AT3G29410;AT3G32030;AT4G13280;AT4G13300;AT4G15870;AT4G20200;AT4G20210;AT4G20230;AT5G44630;AT5G48110	AT1G31950;TPS22;TPS28;AT1G48820;TPS26;TPS06;AT2G23230;AT2G37140;TPS17;TPS18;TPS19;TPS16;TPS15;TPS25;TPS30;TPS12;TPS13;TPS01;TPS07;TPS08;AT4G20230;BS;AT5G48110	NA
TaDOF5.6	TraesCS1A02G196800	C1	AT1G32090	AT1G32090	NA
TaDOF5.6	TraesCS6A02G264400	C1	AT1G32700;AT4G17900;AT5G46710	AT1G32700;AT4G17900;AT5G46710	NA
TaDOF5.6	TraesCS1D02G178600	C5	AT1G33250	AT1G33250	NA
TaDOF5.6	TraesCS6D02G222400	C1	AT1G33260;AT4G10390	AT1G33260;AT4G10390	NA
TaDOF5.6	TraesCS6A02G240100	C5	AT1G33260;AT4G10390	AT1G33260;AT4G10390	NA
TaDOF5.6	TraesCS4B02G232500	C1	AT1G33530;AT4G12560;AT4G22390	AT1G33530;CPR1;AT4G22390	NA
TaDOF5.6	TraesCS3B02G026500	C6	AT1G33530;AT4G12560;AT4G22390	AT1G33530;CPR1;AT4G22390	NA
TaDOF5.6	TraesCS1B02G410900	C6	AT1G33530;AT4G12560;AT4G22390	AT1G33530;CPR1;AT4G22390	NA
TaDOF5.6	TraesCS1D02G396800	C2	AT1G34200;AT4G09670	AT1G34200;AT4G09670	NA
TaDOF5.6	TraesCS5B02G292000	C6	AT1G34320;AT5G08660	AT1G34320;AT5G08660	NA
TaDOF5.6	TraesCS3B02G416100	C1	AT1G35660	AT1G35660	NA
TaDOF5.6	TraesCS7D02G328900	C6	AT1G36005;AT5G39020;AT5G39030	AT1G36005;AT5G39020;AT5G39030	NA
TaDOF5.6	TraesCS4D02G181900	C6	AT1G36280;AT4G18440	AT1G36280;AT4G18440	NA
TaDOF5.6	TraesCS6A02G119100	C6	AT1G36730;AT1G77840	AT1G36730;AT1G77840	NA
TaDOF5.6	TraesCS6D02G109000	C6	AT1G36730;AT1G77840	AT1G36730;AT1G77840	NA
TaDOF5.6	TraesCS6B02G147200	C6	AT1G36730;AT1G77840	AT1G36730;AT1G77840	NA
TaDOF5.6	TraesCS2D02G211200	C2	AT1G42680	AT1G42680	NA
TaDOF5.6	TraesCS5A02G113400	C5	AT1G44130;AT1G77480;AT4G33490	AT1G44130;AT1G77480;AT4G33490	NA
TaDOF5.6	TraesCS5D02G128800	C5	AT1G44130;AT1G77480;AT4G33490	AT1G44130;AT1G77480;AT4G33490	NA
TaDOF5.6	TraesCS1B02G281700	C1	AT1G44414	AT1G44414	NA
TaDOF5.6	TraesCS1D02G267700	C1	AT1G44760	AT1G44760	NA
TaDOF5.6	TraesCS1B02G278500	C1	AT1G44760	AT1G44760	NA
TaDOF5.6	TraesCS1A02G267800	C1	AT1G44760	AT1G44760	NA
TaDOF5.6	TraesCS6B02G363600	C1	AT1G45207;AT4G36970	AT1G45207;AT4G36970	NA
TaDOF5.6	TraesCS4A02G040500	C6	AT1G47740	AT1G47740	NA
TaDOF5.6	TraesCS1A02G077500	C1	AT1G48040;AT3G17250;AT3G62260	AT1G48040;AT3G17250;AT3G62260	NA
TaDOF5.6	TraesCS1B02G095600	C5	AT1G48040;AT3G17250;AT3G62260	AT1G48040;AT3G17250;AT3G62260	NA
TaDOF5.6	TraesCS7A02G330000	C1	AT1G48100	AT1G48100	NA
TaDOF5.6	TraesCS1D02G081400	C1	AT1G48210;AT1G48220;AT2G47060;AT3G17410;AT3G62220	AT1G48210;AT1G48220;AT2G47060;AT3G17410;AT3G62220	NA
TaDOF5.6	TraesCS1B02G097700	C1	AT1G48210;AT1G48220;AT2G47060;AT3G17410;AT3G62220	AT1G48210;AT1G48220;AT2G47060;AT3G17410;AT3G62220	NA
TaDOF5.6	TraesCS1A02G079700	C1	AT1G48210;AT1G48220;AT2G47060;AT3G17410;AT3G62220	AT1G48210;AT1G48220;AT2G47060;AT3G17410;AT3G62220	NA
TaDOF5.6	TraesCS3A02G193400	C2	AT1G48210;AT1G48220;AT2G47060;AT3G17410;AT3G62220	AT1G48210;AT1G48220;AT2G47060;AT3G17410;AT3G62220	NA
TaDOF5.6	TraesCS4A02G044900	C5	AT1G48510;AT3G17910	AT1G48510;SURF1	NA
TaDOF5.6	TraesCS3B02G335300	C5	AT1G48690;AT1G59500;AT2G14960;AT2G23170;AT4G37390	AT1G48690;GH3.4;GH3.1;GH3.3;YDK1	NA
TaDOF5.6	TraesCS3D02G300600	C5	AT1G48690;AT1G59500;AT2G14960;AT2G23170;AT4G37390	AT1G48690;GH3.4;GH3.1;GH3.3;YDK1	NA
TaDOF5.6	TraesCS4A02G320100	C6	AT1G49390;AT5G20400	AT1G49390;AT5G20400	NA
TaDOF5.6	TraesCS3D02G106200	C5	AT1G49700;AT2G01560;AT2G11620;AT2G11623;AT2G29605;AT2G29850;AT2G46420;AT3G45800;AT3G61700	AT1G49700;AT2G01560;AT2G11620;AT2G11623;AT2G29605;AT2G29850;AT2G46420;AT3G45800;AT3G61700	NA
TaDOF5.6	TraesCS7A02G326200	C5	AT1G49740;AT3G19310;AT4G36945	AT1G49740;AT3G19310;AT4G36945	NA
TaDOF5.6	TraesCS7B02G302100	C6	AT1G50120	AT1G50120	NA
TaDOF5.6	TraesCS2D02G555200	C5	AT1G50280;AT3G19850	AT1G50280;AT3G19850	NA
TaDOF5.6	TraesCS5B02G134600	C1	AT1G50450	AT1G50450	NA
TaDOF5.6	TraesCS2D02G197100	C6	AT1G50570;AT5G55530	AT1G50570;AT5G55530	NA
TaDOF5.6	TraesCS6D02G127500	C5	AT1G50670	AT1G50670	NA
TaDOF5.6	TraesCS4A02G199900	C1	AT1G51055	AT1G51055	NA
TaDOF5.6	TraesCS4D02G289400	C6	AT1G51310	AT1G51310	NA
TaDOF5.6	TraesCS6A02G133000	C1	AT1G52315;AT1G79910;AT4G32350	AT1G52315;AT1G79910;AT4G32350	NA
TaDOF5.6	TraesCS6B02G161300	C1	AT1G52315;AT1G79910;AT4G32350	AT1G52315;AT1G79910;AT4G32350	NA
TaDOF5.6	TraesCS1B02G258100	C1	AT1G52320;AT5G25590	AT1G52320;AT5G25590	NA
TaDOF5.6	TraesCS1D02G246700	C1	AT1G52320;AT5G25590	AT1G52320;AT5G25590	NA
TaDOF5.6	TraesCS1B02G031500	C6	AT1G52370;AT4G28360	AT1G52370;AT4G28360	NA
TaDOF5.6	TraesCS2A02G517900	C1	AT1G52510	AT1G52510	NA
TaDOF5.6	TraesCS7D02G128300	C1	AT1G52540;AT3G15890	AT1G52540;AT3G15890	NA
TaDOF5.6	TraesCS1A02G118100	C2	AT1G52770;AT3G15570	AT1G52770;AT3G15570	NA
TaDOF5.6	TraesCS1A02G171400	C5	AT1G52910;AT1G61065;AT3G15480;AT4G27435	AT1G52910;AT1G61065;AT3G15480;AT4G27435	NA
TaDOF5.6	TraesCS1B02G185600	C5	AT1G52910;AT1G61065;AT3G15480;AT4G27435	AT1G52910;AT1G61065;AT3G15480;AT4G27435	NA
TaDOF5.6	TraesCS3A02G246900	C1	AT1G53190;AT3G15070	AT1G53190;AT3G15070	NA
TaDOF5.6	TraesCS1B02G426200	C1	AT1G53190;AT3G15070	AT1G53190;AT3G15070	NA
TaDOF5.6	TraesCS1A02G398300	C1	AT1G53190;AT3G15070	AT1G53190;AT3G15070	NA
TaDOF5.6	TraesCS1D02G405800	C1	AT1G53190;AT3G15070	AT1G53190;AT3G15070	NA
TaDOF5.6	TraesCS3B02G272400	C1	AT1G53190;AT3G15070	AT1G53190;AT3G15070	NA
TaDOF5.6	TraesCS7D02G263000	C6	AT1G54110;AT3G55600	AT1G54110;AT3G55600	NA
TaDOF5.6	TraesCS7A02G014600	C5	AT1G54220;AT3G13930	AT1G54220;AT3G13930	NA
TaDOF5.6	TraesCS6D02G024400	C5	AT1G54220;AT3G13930	AT1G54220;AT3G13930	NA
TaDOF5.6	TraesCS4B02G273400	C6	AT1G54440;AT5G35910	AT1G54440;RRP6L2	NA
TaDOF5.6	TraesCS1D02G138000	C6	AT1G54440;AT5G35910	AT1G54440;RRP6L2	NA
TaDOF5.6	TraesCS4A02G277800	C1	AT1G54520	AT1G54520	NA
TaDOF5.6	TraesCS1A02G251100	C6	AT1G54790	AT1G54790	NA
TaDOF5.6	TraesCS1D02G250700	C6	AT1G54790	AT1G54790	NA
TaDOF5.6	TraesCS1A02G249500	C1	AT1G54820	AT1G54820	NA
TaDOF5.6	TraesCS1D02G084900	C1	AT1G54870;AT3G05260	AT1G54870;AT3G05260	NA
TaDOF5.6	TraesCS4B02G038000	C1	AT1G55000	AT1G55000	NA
TaDOF5.6	TraesCS1B02G468900	C1	AT1G55200;AT3G13690;AT5G56790	AT1G55200;AT3G13690;AT5G56790	NA
TaDOF5.6	TraesCS3D02G217700	C2	AT1G55200;AT3G13690;AT5G56790	AT1G55200;AT3G13690;AT5G56790	NA
TaDOF5.6	TraesCS2D02G203000	C5	AT1G55360;AT3G13510;AT5G56530	AT1G55360;AT3G13510;AT5G56530	NA
TaDOF5.6	TraesCS5B02G056100	C6	AT1G55890;AT3G13160	AT1G55890;AT3G13160	NA
TaDOF5.6	TraesCS2B02G437800	C1	AT1G56090	AT1G56090	NA
TaDOF5.6	TraesCS2A02G418400	C5	AT1G56120;AT1G56130;AT1G56140;AT1G56145	AT1G56120;AT1G56130;AT1G56140;AT1G56145	NA
TaDOF5.6	TraesCS2D02G415600	C5	AT1G56120;AT1G56130;AT1G56140;AT1G56145	AT1G56120;AT1G56130;AT1G56140;AT1G56145	NA
TaDOF5.6	TraesCS2B02G437300	C6	AT1G56120;AT1G56130;AT1G56140;AT1G56145	AT1G56120;AT1G56130;AT1G56140;AT1G56145	NA
TaDOF5.6	TraesCS4B02G187600	C2	AT1G56300	AT1G56300	NA
TaDOF5.6	TraesCS2B02G172900	C1	AT1G56700	AT1G56700	NA
TaDOF5.6	TraesCS4A02G107100	C2	AT1G57550;AT2G38905	AT1G57550;AT2G38905	NA
TaDOF5.6	TraesCS4B02G197300	C2	AT1G57550;AT2G38905	AT1G57550;AT2G38905	NA
TaDOF5.6	TraesCS4D02G197700	C2	AT1G57550;AT2G38905	AT1G57550;AT2G38905	NA
TaDOF5.6	TraesCS4D02G197800	C6	AT1G57550;AT2G38905	AT1G57550;AT2G38905	NA
TaDOF5.6	TraesCS5A02G220500	C6	AT1G60050;AT1G70260;AT3G28050;AT3G28060;AT3G28070;AT3G28080;AT3G28100;AT3G28130;AT4G15540;AT5G40210;AT5G40230;AT5G40240	AT1G60050;AT1G70260;AT3G28050;AT3G28060;AT3G28070;AT3G28080;AT3G28100;AT3G28130;AT4G15540;AT5G40210;AT5G40230;AT5G40240	NA
TaDOF5.6	TraesCS1B02G212900	C6	AT1G60640	AT1G60640	NA
TaDOF5.6	TraesCS1B02G151500	C5	AT1G61415;AT1G61450	AT1G61415;AT1G61450	NA
TaDOF5.6	TraesCS2B02G238000	C5	AT1G61667;AT5G54530	AT1G61667;AT5G54530	NA
TaDOF5.6	TraesCS2D02G219100	C6	AT1G61667;AT5G54530	AT1G61667;AT5G54530	NA
TaDOF5.6	TraesCS7B02G144400	C5	AT1G62610;AT1G63380;AT2G17845;AT3G46170;AT3G55290;AT3G55310	AT1G62610;AT1G63380;AT2G17845;AT3G46170;AT3G55290;AT3G55310	NA
TaDOF5.6	TraesCS7D02G245700	C6	AT1G62610;AT1G63380;AT2G17845;AT3G46170;AT3G55290;AT3G55310	AT1G62610;AT1G63380;AT2G17845;AT3G46170;AT3G55290;AT3G55310	NA
TaDOF5.6	TraesCS7B02G346500	C5	AT1G62790	AT1G62790	NA
TaDOF5.6	TraesCS7A02G063700	C5	AT1G63010;AT4G11810;AT4G22990	AT1G63010;AT4G11810;AT4G22990	NA
TaDOF5.6	TraesCS2B02G385900	C2	AT1G63430;AT5G41180	AT1G63430;AT5G41180	NA
TaDOF5.6	TraesCS4B02G364400	C1	AT1G63520;AT4G11450	AT1G63520;AT4G11450	NA
TaDOF5.6	TraesCS3A02G151300	C2	AT1G64110	AT1G64110	NA
TaDOF5.6	TraesCS3D02G229000	C6	AT1G64140	AT1G64140	NA
TaDOF5.6	TraesCS2A02G402000	C5	AT1G64610;AT5G24320;AT5G42010;AT5G53500	AT1G64610;AT5G24320;AT5G42010;AT5G53500	NA
TaDOF5.6	TraesCS1B02G198500	C5	AT1G64650;AT3G49310;AT4G27720	AT1G64650;AT3G49310;AT4G27720	NA
TaDOF5.6	TraesCS4B02G399200	C5	AT1G64650;AT3G49310;AT4G27720	AT1G64650;AT3G49310;AT4G27720	NA
TaDOF5.6	TraesCS3A02G472400	C5	AT1G64650;AT3G49310;AT4G27720	AT1G64650;AT3G49310;AT4G27720	NA
TaDOF5.6	TraesCS5A02G429600	C1	AT1G64760;AT2G19440;AT3G04010;AT5G18220	AT1G64760;AT2G19440;AT3G04010;AT5G18220	NA
TaDOF5.6	TraesCS5A02G040100	C5	AT1G64760;AT2G19440;AT3G04010;AT5G18220	AT1G64760;AT2G19440;AT3G04010;AT5G18220	NA
TaDOF5.6	TraesCS5B02G033700	C6	AT1G65030	AT1G65030	NA
TaDOF5.6	TraesCS6D02G200200	C6	AT1G65540;AT3G59820	AT1G65540;AT3G59820	NA
TaDOF5.6	TraesCS6D02G114300	C6	AT1G65780;AT1G65810;AT4G05540;AT5G37030;AT5G37140;AT5G37150;AT5G37160;AT5G37165;AT5G52090	AT1G65780;AT1G65810;AT4G05540;AT5G37030;AT5G37140;AT5G37150;AT5G37160;AT5G37165;AT5G52090	NA
TaDOF5.6	TraesCS6A02G124000	C6	AT1G65780;AT1G65810;AT4G05540;AT5G37030;AT5G37140;AT5G37150;AT5G37160;AT5G37165;AT5G52090	AT1G65780;AT1G65810;AT4G05540;AT5G37030;AT5G37140;AT5G37150;AT5G37160;AT5G37165;AT5G52090	NA
TaDOF5.6	TraesCS4D02G042000	C6	AT1G65820	AT1G65820	NA
TaDOF5.6	TraesCS4B02G044500	C6	AT1G65820	AT1G65820	NA
TaDOF5.6	TraesCS6D02G241800	C1	AT1G65920	AT1G65920	NA
TaDOF5.6	TraesCS3D02G146700	C6	AT1G65950	AT1G65950	NA
TaDOF5.6	TraesCS6B02G089600	C5	AT1G66070;AT5G37475	AT1G66070;AT5G37475	NA
TaDOF5.6	TraesCS3D02G136300	C2	AT1G66530;AT4G26300	AT1G66530;emb1027	NA
TaDOF5.6	TraesCS7D02G506800	C1	AT1G67300;AT1G79820	AT1G67300;SGB1	NA
TaDOF5.6	TraesCS3A02G429900	C6	AT1G67340;AT5G50450	AT1G67340;AT5G50450	NA
TaDOF5.6	TraesCS2B02G261900	C5	AT1G67420	AT1G67420	NA
TaDOF5.6	TraesCS3A02G446400	C5	AT1G67480	AT1G67480	NA
TaDOF5.6	TraesCS3B02G481500	C5	AT1G67480	AT1G67480	NA
TaDOF5.6	TraesCS3D02G439000	C5	AT1G67480	AT1G67480	NA
TaDOF5.6	TraesCS3D02G397600	C1	AT1G67650;AT1G67680	AT1G67650;AT1G67680	NA
TaDOF5.6	TraesCS7B02G283200	C1	AT1G67800;AT3G01650;AT5G14420	AT1G67800;RGLG1;RGLG2	NA
TaDOF5.6	TraesCS3D02G408900	C1	AT1G67800;AT3G01650;AT5G14420	AT1G67800;RGLG1;RGLG2	NA
TaDOF5.6	TraesCS5D02G122000	C6	AT1G67800;AT3G01650;AT5G14420	AT1G67800;RGLG1;RGLG2	NA
TaDOF5.6	TraesCS5D02G097900	C6	AT1G67890;AT3G06620;AT5G49470	AT1G67890;AT3G06620;AT5G49470	NA
TaDOF5.6	TraesCS6B02G327800	C1	AT1G68070;AT2G01735	AT1G68070;RIE1	NA
TaDOF5.6	TraesCS6A02G298300	C1	AT1G68070;AT2G01735	AT1G68070;RIE1	NA
TaDOF5.6	TraesCS2A02G502200	C1	AT1G68300	AT1G68300	NA
TaDOF5.6	TraesCS2D02G502700	C1	AT1G68300	AT1G68300	NA
TaDOF5.6	TraesCS3D02G205200	C1	AT1G68410	AT1G68410	NA
TaDOF5.6	TraesCS7A02G212000	C1	AT1G68940	AT1G68940	NA
TaDOF5.6	TraesCS2B02G271100	C6	AT1G69210	AT1G69210	NA
TaDOF5.6	TraesCS6D02G287200	C1	AT1G69520;AT1G69523;AT1G69526	AT1G69520;AT1G69523;AT1G69526	NA
TaDOF5.6	TraesCS2A02G344800	C1	AT1G69680	AT1G69680	NA
TaDOF5.6	TraesCS6A02G217000	C5	AT1G70640	AT1G70640	NA
TaDOF5.6	TraesCS6D02G198500	C6	AT1G70640	AT1G70640	NA
TaDOF5.6	TraesCS5D02G212900	C1	AT1G70740	AT1G70740	NA
TaDOF5.6	TraesCS5B02G204900	C1	AT1G70740	AT1G70740	NA
TaDOF5.6	TraesCS3A02G216800	C1	AT1G71000	AT1G71000	NA
TaDOF5.6	TraesCS3D02G218800	C1	AT1G71000	AT1G71000	NA
TaDOF5.6	TraesCS1B02G273500	C1	AT1G71691	AT1G71691	NA
TaDOF5.6	TraesCS4D02G039000	C6	AT1G71940;AT4G09580	AT1G71940;AT4G09580	NA
TaDOF5.6	TraesCS4B02G041800	C6	AT1G71940;AT4G09580	AT1G71940;AT4G09580	NA
TaDOF5.6	TraesCS1B02G466100	C5	AT1G72060	AT1G72060	NA
TaDOF5.6	TraesCS1B02G411900	C5	AT1G72110;AT2G38995;AT2G43255;AT3G49190;AT3G49200;AT3G49210;AT5G12420;AT5G16350;AT5G22490;AT5G37300;AT5G53380;AT5G53390	AT1G72110;AT2G38995;AT2G43255;AT3G49190;AT3G49200;AT3G49210;AT5G12420;AT5G16350;AT5G22490;WSD1;AT5G53380;AT5G53390	NA
TaDOF5.6	TraesCS1D02G393500	C5	AT1G72110;AT2G38995;AT2G43255;AT3G49190;AT3G49200;AT3G49210;AT5G12420;AT5G16350;AT5G22490;AT5G37300;AT5G53380;AT5G53390	AT1G72110;AT2G38995;AT2G43255;AT3G49190;AT3G49200;AT3G49210;AT5G12420;AT5G16350;AT5G22490;WSD1;AT5G53380;AT5G53390	NA
TaDOF5.6	TraesCS2A02G441200	C2	AT1G72270;AT4G27010	AT1G72270;AT4G27010	NA
TaDOF5.6	TraesCS2B02G241900	C5	AT1G72460	AT1G72460	NA
TaDOF5.6	TraesCS1A02G195300	C6	AT1G72550	AT1G72550	NA
TaDOF5.6	TraesCS4B02G291500	C6	AT1G72820;AT5G26200	AT1G72820;AT5G26200	NA
TaDOF5.6	TraesCS3D02G253100	C6	AT1G73020	AT1G73020	NA
TaDOF5.6	TraesCS3D02G451300	C2	AT1G73320	AT1G73320	NA
TaDOF5.6	TraesCS3D02G201600	C1	AT1G73740	AT1G73740	NA
TaDOF5.6	TraesCS2D02G190200	C5	AT1G74360	AT1G74360	NA
TaDOF5.6	TraesCS7A02G159700	C1	AT1G74530	AT1G74530	NA
TaDOF5.6	TraesCS7B02G064200	C5	AT1G74530	AT1G74530	NA
TaDOF5.6	TraesCS4A02G259700	C6	AT1G75170;AT4G36640	AT1G75170;AT4G36640	NA
TaDOF5.6	TraesCS5D02G180600	C6	AT1G75670	AT1G75670	NA
TaDOF5.6	TraesCS1D02G122000	C6	AT1G77340;AT5G65560	AT1G77340;AT5G65560	NA
TaDOF5.6	TraesCS6B02G327300	C1	AT1G78040;AT4G08685;AT5G10130	AT1G78040;SAH7;DFC	NA
TaDOF5.6	TraesCS6D02G277600	C1	AT1G78040;AT4G08685;AT5G10130	AT1G78040;SAH7;DFC	NA
TaDOF5.6	TraesCS4A02G406400	C5	AT1G78230	AT1G78230	NA
TaDOF5.6	TraesCS7D02G125400	C5	AT1G78230	AT1G78230	NA
TaDOF5.6	TraesCS2A02G487000	C6	AT1G78690	AT1G78690	NA
TaDOF5.6	TraesCS4D02G018200	C6	AT1G79120	AT1G79120	NA
TaDOF5.6	TraesCS5D02G109100	C6	AT1G79150	AT1G79150	NA
TaDOF5.6	TraesCS5B02G102300	C6	AT1G79150	AT1G79150	NA
TaDOF5.6	TraesCS7D02G153300	C5	AT1G79710	AT1G79710	NA
TaDOF5.6	TraesCS7A02G151400	C6	AT1G79710	AT1G79710	NA
TaDOF5.6	TraesCS7B02G055400	C6	AT1G79710	AT1G79710	NA
TaDOF5.6	TraesCS5A02G221900	C1	AT1G79720;AT5G24820	AT1G79720;AT5G24820	NA
TaDOF5.6	TraesCS5B02G220700	C1	AT1G79720;AT5G24820	AT1G79720;AT5G24820	NA
TaDOF5.6	TraesCS1B02G147100	C6	AT1G79890	AT1G79890	NA
TaDOF5.6	TraesCS1B02G139500	C1	AT1G79920;AT1G79930	AT1G79920;HSP70-14	NA
TaDOF5.6	TraesCS1D02G121000	C1	AT1G79920;AT1G79930	AT1G79920;HSP70-14	NA
TaDOF5.6	TraesCS7B02G438200	C1	AT1G80040;AT5G32440	AT1G80040;AT5G32440	NA
TaDOF5.6	TraesCS3B02G227300	C5	AT1G80200;AT5G11280	AT1G80200;AT5G11280	NA
TaDOF5.6	TraesCS7A02G251600	C1	AT1G80290	AT1G80290	NA
TaDOF5.6	TraesCS7A02G142400	C2	AT1G80530	AT1G80530	NA
TaDOF5.6	TraesCS7D02G142800	C6	AT1G80530	AT1G80530	NA
TaDOF5.6	TraesCS6B02G399800	C1	AT1G80540;AT2G12400;AT2G25270	AT1G80540;AT2G12400;AT2G25270	NA
TaDOF5.6	TraesCS6B02G173300	C2	AT1G80540;AT2G12400;AT2G25270	AT1G80540;AT2G12400;AT2G25270	NA
TaDOF5.6	TraesCS7B02G421800	C1	AT1G80640	AT1G80640	NA
TaDOF5.6	TraesCS1A02G401900	C5	AT1G80870	AT1G80870	NA
TaDOF5.6	TraesCS3A02G026500	C1	AT2G01320	AT2G01320	NA
TaDOF5.6	TraesCS3B02G017100	C1	AT2G01320	AT2G01320	NA
TaDOF5.6	TraesCS7D02G428100	C6	AT2G01390	AT2G01390	NA
TaDOF5.6	TraesCS5A02G516400	C1	AT2G02370	AT2G02370	NA
TaDOF5.6	TraesCS5A02G211000	C1	AT2G03140	AT2G03140	NA
TaDOF5.6	TraesCS4D02G251700	C1	AT2G03350	AT2G03350	NA
TaDOF5.6	TraesCS4D02G104900	C5	AT2G05830	AT2G05830	NA
TaDOF5.6	TraesCS6B02G173400	C2	AT2G12646	AT2G12646	NA
TaDOF5.6	TraesCS7B02G045900	C6	AT2G13100	AT2G13100	NA
TaDOF5.6	TraesCS6D02G281300	C2	AT2G13840	AT2G13840	NA
TaDOF5.6	TraesCS4B02G268000	C5	AT2G13840	AT2G13840	NA
TaDOF5.6	TraesCS6A02G302000	C6	AT2G13840	AT2G13840	NA
TaDOF5.6	TraesCS4A02G291000	C2	AT2G14660	AT2G14660	NA
TaDOF5.6	TraesCS5A02G105400	C6	AT2G14860;AT4G33905;AT5G43140	AT2G14860;AT4G33905;AT5G43140	NA
TaDOF5.6	TraesCS2A02G514400	C6	AT2G15530;AT4G34040	AT2G15530;MBR2	NA
TaDOF5.6	TraesCS2A02G326700	C6	AT2G15630	AT2G15630	NA
TaDOF5.6	TraesCS7B02G286200	C1	AT2G16460;AT3G51090	AT2G16460;AT3G51090	NA
TaDOF5.6	TraesCS7A02G383300	C1	AT2G16460;AT3G51090	AT2G16460;AT3G51090	NA
TaDOF5.6	TraesCS5D02G092600	C1	AT2G16490	AT2G16490	NA
TaDOF5.6	TraesCS4D02G229100	C1	AT2G16750;AT4G35030	AT2G16750;AT4G35030	NA
TaDOF5.6	TraesCS4A02G072300	C2	AT2G16750;AT4G35030	AT2G16750;AT4G35030	NA
TaDOF5.6	TraesCS4A02G121100	C6	AT2G16760;AT2G47370;AT5G28660	AT2G16760;AT2G47370;AT5G28660	NA
TaDOF5.6	TraesCS4D02G269200	C6	AT2G16940	AT2G16940	NA
TaDOF5.6	TraesCS7D02G228000	C5	AT2G17320;AT2G17340;AT4G35360	AT2G17320;AT2G17340;AT4G35360	NA
TaDOF5.6	TraesCS7A02G271600	C1	AT2G17880;AT4G36040	AT2G17880;ATJ11	NA
TaDOF5.6	TraesCS1B02G465000	C1	AT2G18190;AT2G18193;AT3G29800;AT5G17730;AT5G17740;AT5G17750;AT5G17760	AT2G18190;AT2G18193;AT3G29800;AT5G17730;AT5G17740;AT5G17750;AT5G17760	NA
TaDOF5.6	TraesCS1A02G429800	C5	AT2G18190;AT2G18193;AT3G29800;AT5G17730;AT5G17740;AT5G17750;AT5G17760	AT2G18190;AT2G18193;AT3G29800;AT5G17730;AT5G17740;AT5G17750;AT5G17760	NA
TaDOF5.6	TraesCS1D02G439200	C5	AT2G18190;AT2G18193;AT3G29800;AT5G17730;AT5G17740;AT5G17750;AT5G17760	AT2G18190;AT2G18193;AT3G29800;AT5G17730;AT5G17740;AT5G17750;AT5G17760	NA
TaDOF5.6	TraesCS3A02G215000	C5	AT2G18190;AT2G18193;AT3G29800;AT5G17730;AT5G17740;AT5G17750;AT5G17760	AT2G18190;AT2G18193;AT3G29800;AT5G17730;AT5G17740;AT5G17750;AT5G17760	NA
TaDOF5.6	TraesCS4A02G318400	C5	AT2G18190;AT2G18193;AT3G29800;AT5G17730;AT5G17740;AT5G17750;AT5G17760	AT2G18190;AT2G18193;AT3G29800;AT5G17730;AT5G17740;AT5G17750;AT5G17760	NA
TaDOF5.6	TraesCS3B02G246300	C6	AT2G18190;AT2G18193;AT3G29800;AT5G17730;AT5G17740;AT5G17750;AT5G17760	AT2G18190;AT2G18193;AT3G29800;AT5G17730;AT5G17740;AT5G17750;AT5G17760	NA
TaDOF5.6	TraesCS3D02G218100	C6	AT2G18190;AT2G18193;AT3G29800;AT5G17730;AT5G17740;AT5G17750;AT5G17760	AT2G18190;AT2G18193;AT3G29800;AT5G17730;AT5G17740;AT5G17750;AT5G17760	NA
TaDOF5.6	TraesCS3A02G226000	C5	AT2G18360;AT4G36610	AT2G18360;AT4G36610	NA
TaDOF5.6	TraesCS4D02G262800	C1	AT2G18540;AT4G36700	AT2G18540;AT4G36700	NA
TaDOF5.6	TraesCS4B02G262700	C1	AT2G18540;AT4G36700	AT2G18540;AT4G36700	NA
TaDOF5.6	TraesCS7D02G288000	C1	AT2G18876;AT5G57410	AT2G18876;AT5G57410	NA
TaDOF5.6	TraesCS7D02G251500	C1	AT2G19090;AT4G30130	AT2G19090;AT4G30130	NA
TaDOF5.6	TraesCS7A02G252800	C5	AT2G19090;AT4G30130	AT2G19090;AT4G30130	NA
TaDOF5.6	TraesCS1D02G131500	C6	AT2G19120;AT4G30100	AT2G19120;AT4G30100	NA
TaDOF5.6	TraesCS4B02G145400	C6	AT2G19120;AT4G30100	AT2G19120;AT4G30100	NA
TaDOF5.6	TraesCS1B02G150500	C6	AT2G19120;AT4G30100	AT2G19120;AT4G30100	NA
TaDOF5.6	TraesCS2D02G428700	C5	AT2G19160;AT4G25870;AT4G30060;AT4G31350;AT5G57270	AT2G19160;AT4G25870;AT4G30060;AT4G31350;AT5G57270	NA
TaDOF5.6	TraesCS7D02G412700	C6	AT2G19160;AT4G25870;AT4G30060;AT4G31350;AT5G57270	AT2G19160;AT4G25870;AT4G30060;AT4G31350;AT5G57270	NA
TaDOF5.6	TraesCS1B02G143500	C6	AT2G19780;AT4G29240	AT2G19780;AT4G29240	NA
TaDOF5.6	TraesCS4A02G104100	C5	AT2G20010;AT2G25800	AT2G20010;AT2G25800	NA
TaDOF5.6	TraesCS2B02G379800	C1	AT2G20240;AT4G28760;AT5G43880	AT2G20240;AT4G28760;AT5G43880	NA
TaDOF5.6	TraesCS2D02G359400	C1	AT2G20240;AT4G28760;AT5G43880	AT2G20240;AT4G28760;AT5G43880	NA
TaDOF5.6	TraesCS4D02G000400	C6	AT2G20390	AT2G20390	NA
TaDOF5.6	TraesCS6B02G255800	C5	AT2G20420	AT2G20420	NA
TaDOF5.6	TraesCS5D02G339000	C5	AT2G20940	AT2G20940	NA
TaDOF5.6	TraesCS1B02G193800	C1	AT2G21230;AT4G38900	AT2G21230;AT4G38900	bZIP
TaDOF5.6	TraesCS5A02G015000	C6	AT2G21690	AT2G21690	NA
TaDOF5.6	TraesCS3A02G412900	C5	AT2G22160;AT3G48340;AT3G48350;AT5G50260	AT2G22160;CEP2;CEP3;CEP1	NA
TaDOF5.6	TraesCS2B02G400300	C5	AT2G22230;AT5G10160	AT2G22230;AT5G10160	NA
TaDOF5.6	TraesCS4A02G254100	C6	AT2G22400;AT4G40000	AT2G22400;AT4G40000	NA
TaDOF5.6	TraesCS6D02G234000	C6	AT2G22690;AT4G37880;AT5G09630	AT2G22690;RMD5;AT5G09630	NA
TaDOF5.6	TraesCS4B02G088600	C1	AT2G22960	AT2G22960	NA
TaDOF5.6	TraesCS4D02G087400	C1	AT2G22960	AT2G22960	NA
TaDOF5.6	TraesCS5D02G271500	C1	AT2G22960	AT2G22960	NA
TaDOF5.6	TraesCS2B02G275800	C2	AT2G23700;AT3G18900;AT5G66600	AT2G23700;AT3G18900;AT5G66600	NA
TaDOF5.6	TraesCS1B02G188300	C1	AT2G23790;AT4G36820;AT5G42610;AT5G66650	AT2G23790;AT4G36820;AT5G42610;AT5G66650	NA
TaDOF5.6	TraesCS7A02G510200	C6	AT2G24280	AT2G24280	NA
TaDOF5.6	TraesCS6A02G360000	C6	AT2G24320;AT4G31020	AT2G24320;AT4G31020	NA
TaDOF5.6	TraesCS7A02G418100	C5	AT2G24400;AT4G31320	AT2G24400;AT4G31320	NA
TaDOF5.6	TraesCS7A02G260300	C6	AT2G24990;AT5G37350	AT2G24990;AT5G37350	NA
TaDOF5.6	TraesCS4B02G207200	C1	AT2G25430;AT4G32285	AT2G25430;AT4G32285	NA
TaDOF5.6	TraesCS6B02G210800	C2	AT2G25480;AT4G32330	AT2G25480;WDL5	NA
TaDOF5.6	TraesCS5A02G493100	C6	AT2G25560;AT4G19590;AT5G37380;AT5G37440;AT5G37750;AT5G50115;AT5G50510;AT5G50620;AT5G53150	AT2G25560;AT4G19590;AT5G37380;AT5G37440;AT5G37750;AT5G50115;AT5G50510;AT5G50620;AT5G53150	NA
TaDOF5.6	TraesCS3D02G234100	C5	AT2G25610;AT4G32530	AT2G25610;AT4G32530	NA
TaDOF5.6	TraesCS3A02G218100	C5	AT2G25610;AT4G32530	AT2G25610;AT4G32530	NA
TaDOF5.6	TraesCS5B02G184700	C1	AT2G25737	AT2G25737	NA
TaDOF5.6	TraesCS5D02G191500	C1	AT2G25737	AT2G25737	NA
TaDOF5.6	TraesCS5D02G218600	C5	AT2G26270;AT3G43930	AT2G26270;AT3G43930	NA
TaDOF5.6	TraesCS5A02G213400	C5	AT2G26270;AT3G43930	AT2G26270;AT3G43930	NA
TaDOF5.6	TraesCS4A02G011700	C1	AT2G26340	AT2G26340	NA
TaDOF5.6	TraesCS5D02G331500	C1	AT2G26680	AT2G26680	NA
TaDOF5.6	TraesCS5A02G026300	C1	AT2G26730	AT2G26730	NA
TaDOF5.6	TraesCS5B02G025300	C5	AT2G26730	AT2G26730	NA
TaDOF5.6	TraesCS5D02G034200	C5	AT2G26730	AT2G26730	NA
TaDOF5.6	TraesCS3B02G364700	C5	AT2G26850;AT2G32560	AT2G26850;AT2G32560	NA
TaDOF5.6	TraesCS2B02G290300	C6	AT2G26970	AT2G26970	NA
TaDOF5.6	TraesCS3D02G366700	C1	AT2G27500	AT2G27500	NA
TaDOF5.6	TraesCS7B02G180100	C5	AT2G27930	AT2G27930	NA
TaDOF5.6	TraesCS3B02G233200	C6	AT2G28050	AT2G28050	NA
TaDOF5.6	TraesCS4D02G029700	C1	AT2G28150	AT2G28150	NA
TaDOF5.6	TraesCS1B02G173600	C5	AT2G28320;AT3G54800	AT2G28320;AT3G54800	NA
TaDOF5.6	TraesCS1D02G155000	C5	AT2G28320;AT3G54800	AT2G28320;AT3G54800	NA
TaDOF5.6	TraesCS4B02G255600	C1	AT2G28370	AT2G28370	NA
TaDOF5.6	TraesCS5A02G157200	C2	AT2G28620;AT3G45850	AT2G28620;AT3G45850	NA
TaDOF5.6	TraesCS5B02G156500	C2	AT2G28620;AT3G45850	AT2G28620;AT3G45850	NA
TaDOF5.6	TraesCS1B02G071500	C2	AT2G28620;AT3G45850	AT2G28620;AT3G45850	NA
TaDOF5.6	TraesCS5D02G162500	C2	AT2G28620;AT3G45850	AT2G28620;AT3G45850	NA
TaDOF5.6	TraesCS1A02G030600	C1	AT2G29020;AT5G59410	AT2G29020;AT5G59410	NA
TaDOF5.6	TraesCS4D02G211800	C1	AT2G29510;AT2G37930;AT5G01030;AT5G59020	AT2G29510;AT2G37930;AT5G01030;AT5G59020	NA
TaDOF5.6	TraesCS4B02G211200	C1	AT2G29510;AT2G37930;AT5G01030;AT5G59020	AT2G29510;AT2G37930;AT5G01030;AT5G59020	NA
TaDOF5.6	TraesCS4B02G139400	C1	AT2G29590	AT2G29590	NA
TaDOF5.6	TraesCS3D02G475400	C6	AT2G30600	AT2G30600	NA
TaDOF5.6	TraesCS1D02G333200	C2	AT2G32160;AT2G32170	AT2G32160;AT2G32170	NA
TaDOF5.6	TraesCS5D02G074100	C6	AT2G32295;AT5G35730	AT2G32295;AT5G35730	NA
TaDOF5.6	TraesCS7D02G391500	C5	AT2G33590;AT2G33600	AT2G33590;AT2G33600	NA
TaDOF5.6	TraesCS6D02G321900	C6	AT2G34357	AT2G34357	NA
TaDOF5.6	TraesCS1A02G411600	C5	AT2G34890	AT2G34890	NA
TaDOF5.6	TraesCS1B02G441900	C6	AT2G34890	AT2G34890	NA
TaDOF5.6	TraesCS1D02G419400	C6	AT2G34890	AT2G34890	NA
TaDOF5.6	TraesCS5A02G074800	C5	AT2G34970;AT3G02270;AT4G18300	AT2G34970;AT3G02270;AT4G18300	NA
TaDOF5.6	TraesCS1A02G288300	C6	AT2G35040	AT2G35040	NA
TaDOF5.6	TraesCS3A02G441500	C5	AT2G35730	AT2G35730	NA
TaDOF5.6	TraesCS3D02G434300	C6	AT2G35730	AT2G35730	NA
TaDOF5.6	TraesCS4A02G043000	C1	AT2G35760	AT2G35760	NA
TaDOF5.6	TraesCS4A02G257400	C5	AT2G36630	AT2G36630	NA
TaDOF5.6	TraesCS2D02G377800	C5	AT2G37030;AT3G53250;AT5G03310	AT2G37030;AT3G53250;AT5G03310	NA
TaDOF5.6	TraesCS2B02G398600	C5	AT2G37030;AT3G53250;AT5G03310	AT2G37030;AT3G53250;AT5G03310	NA
TaDOF5.6	TraesCS3D02G543900	C5	AT2G37050	AT2G37050	NA
TaDOF5.6	TraesCS3B02G603800	C5	AT2G37050	AT2G37050	NA
TaDOF5.6	TraesCS5B02G154600	C6	AT2G37050	AT2G37050	NA
TaDOF5.6	TraesCS5D02G161800	C6	AT2G37050	AT2G37050	NA
TaDOF5.6	TraesCS4D02G199900	C6	AT2G37290;AT2G39280;AT3G55020	AT2G37290;AT2G39280;AT3G55020	NA
TaDOF5.6	TraesCS4D02G210600	C6	AT2G37730;AT3G11420;AT5G12460	AT2G37730;AT3G11420;AT5G12460	NA
TaDOF5.6	TraesCS4A02G094600	C6	AT2G37730;AT3G11420;AT5G12460	AT2G37730;AT3G11420;AT5G12460	NA
TaDOF5.6	TraesCS4A02G093400	C6	AT2G37890;AT3G53940;AT3G55640	AT2G37890;AT3G53940;AT3G55640	NA
TaDOF5.6	TraesCS1B02G313100	C6	AT2G38610;AT3G08620	AT2G38610;AT3G08620	NA
TaDOF5.6	TraesCS1D02G302200	C6	AT2G38610;AT3G08620	AT2G38610;AT3G08620	NA
TaDOF5.6	TraesCS3A02G340700	C1	AT2G38640	AT2G38640	NA
TaDOF5.6	TraesCS6D02G360000	C2	AT2G38970;AT3G54780;AT5G60710	AT2G38970;AT3G54780;AT5G60710	NA
TaDOF5.6	TraesCS2B02G382300	C5	AT2G38970;AT3G54780;AT5G60710	AT2G38970;AT3G54780;AT5G60710	NA
TaDOF5.6	TraesCS6B02G413100	C6	AT2G38970;AT3G54780;AT5G60710	AT2G38970;AT3G54780;AT5G60710	NA
TaDOF5.6	TraesCS6A02G394900	C1	AT2G39110	AT2G39110	NA
TaDOF5.6	TraesCS3A02G361500	C1	AT2G39710;AT5G02190	AT2G39710;PCS1	NA
TaDOF5.6	TraesCS3D02G360900	C1	AT2G39980;AT5G01210	AT2G39980;AT5G01210	NA
TaDOF5.6	TraesCS3B02G399600	C5	AT2G39980;AT5G01210	AT2G39980;AT5G01210	NA
TaDOF5.6	TraesCS7D02G366300	C5	AT2G40570	AT2G40570	NA
TaDOF5.6	TraesCS7A02G356400	C6	AT2G40570	AT2G40570	NA
TaDOF5.6	TraesCS7B02G271300	C6	AT2G40570	AT2G40570	NA
TaDOF5.6	TraesCS4D02G237800	C6	AT2G40710;AT4G37680;AT4G38290;AT4G38320	AT2G40710;HHP4;AT4G38290;HHP5	NA
TaDOF5.6	TraesCS7D02G398300	C1	AT2G41040	AT2G41040	C2H2
TaDOF5.6	TraesCS3A02G183600	C5	AT2G41050;AT4G20100	AT2G41050;AT4G20100	NA
TaDOF5.6	TraesCS2D02G151100	C6	AT2G41150;AT3G56750	AT2G41150;AT3G56750	NA
TaDOF5.6	TraesCS2B02G171800	C6	AT2G41150;AT3G56750	AT2G41150;AT3G56750	NA
TaDOF5.6	TraesCS2D02G132200	C1	AT2G41250	AT2G41250	NA
TaDOF5.6	TraesCS4A02G148500	C1	AT2G41330;AT3G57070;AT5G13810	AT2G41330;AT3G57070;AT5G13810	NA
TaDOF5.6	TraesCS2B02G062500	C1	AT2G41380	AT2G41380	NA
TaDOF5.6	TraesCS2A02G048600	C5	AT2G41380	AT2G41380	NA
TaDOF5.6	TraesCS2D02G047500	C5	AT2G41380	AT2G41380	NA
TaDOF5.6	TraesCS1A02G033200	C1	AT2G41640;AT3G10320;AT3G57380	AT2G41640;AT3G10320;AT3G57380	NA
TaDOF5.6	TraesCS1B02G041400	C1	AT2G41640;AT3G10320;AT3G57380	AT2G41640;AT3G10320;AT3G57380	NA
TaDOF5.6	TraesCS1D02G034600	C1	AT2G41640;AT3G10320;AT3G57380	AT2G41640;AT3G10320;AT3G57380	NA
TaDOF5.6	TraesCS5A02G458700	C2	AT2G41800;AT2G41810;AT3G08030	AT2G41800;AT2G41810;AT3G08030	NA
TaDOF5.6	TraesCS7A02G417900	C1	AT2G41830;AT5G21080	AT2G41830;AT5G21080	NA
TaDOF5.6	TraesCS7D02G410900	C1	AT2G41830;AT5G21080	AT2G41830;AT5G21080	NA
TaDOF5.6	TraesCS6D02G233900	C2	AT2G41990;AT4G35170	AT2G41990;AT4G35170	NA
TaDOF5.6	TraesCS1A02G198000	C6	AT2G42030;AT3G58030	AT2G42030;AT3G58030	NA
TaDOF5.6	TraesCS5B02G263200	C1	AT2G42320;AT3G57780;AT5G06930	AT2G42320;AT3G57780;AT5G06930	NA
TaDOF5.6	TraesCS7B02G146700	C2	AT2G42320;AT3G57780;AT5G06930	AT2G42320;AT3G57780;AT5G06930	NA
TaDOF5.6	TraesCS1A02G043600	C5	AT2G42780	AT2G42780	NA
TaDOF5.6	TraesCS1D02G044200	C5	AT2G42780	AT2G42780	NA
TaDOF5.6	TraesCS7D02G516100	C1	AT2G42980;AT3G59080	AT2G42980;AT3G59080	NA
TaDOF5.6	TraesCS7D02G516400	C5	AT2G42980;AT3G59080	AT2G42980;AT3G59080	NA
TaDOF5.6	TraesCS2D02G275300	C6	AT2G43110	AT2G43110	NA
TaDOF5.6	TraesCS6D02G198300	C6	AT2G43240;AT3G59360	AT2G43240;UTR6	NA
TaDOF5.6	TraesCS3A02G396500	C6	AT2G43240;AT3G59360	AT2G43240;UTR6	NA
TaDOF5.6	TraesCS2B02G366700	C6	AT2G43240;AT3G59360	AT2G43240;UTR6	NA
TaDOF5.6	TraesCS6A02G217200	C6	AT2G43240;AT3G59360	AT2G43240;UTR6	NA
TaDOF5.6	TraesCS2B02G367700	C1	AT2G43320	AT2G43320	NA
TaDOF5.6	TraesCS2A02G349300	C1	AT2G43320	AT2G43320	NA
TaDOF5.6	TraesCS4B02G083900	C6	AT2G43465;AT3G03320	AT2G43465;AT3G03320	NA
TaDOF5.6	TraesCS6D02G325000	C6	AT2G44020	AT2G44020	NA
TaDOF5.6	TraesCS4A02G342600	C2	AT2G44580	AT2G44580	NA
TaDOF5.6	TraesCS6D02G224000	C5	AT2G44770;AT3G60260	AT2G44770;AT3G60260	NA
TaDOF5.6	TraesCS6D02G225600	C2	AT2G44850	AT2G44850	NA
TaDOF5.6	TraesCS4B02G367600	C5	AT2G45180	AT2G45180	NA
TaDOF5.6	TraesCS5B02G125700	C6	AT2G45380;AT4G34070;AT5G06260	AT2G45380;AT4G34070;AT5G06260	NA
TaDOF5.6	TraesCS5A02G126500	C6	AT2G45380;AT4G34070;AT5G06260	AT2G45380;AT4G34070;AT5G06260	NA
TaDOF5.6	TraesCS5D02G134000	C6	AT2G45380;AT4G34070;AT5G06260	AT2G45380;AT4G34070;AT5G06260	NA
TaDOF5.6	TraesCS3A02G024400	C6	AT2G45730	AT2G45730	NA
TaDOF5.6	TraesCS3D02G021800	C6	AT2G45730	AT2G45730	NA
TaDOF5.6	TraesCS6A02G256000	C5	AT2G45750;AT4G00750	AT2G45750;AT4G00750	NA
TaDOF5.6	TraesCS2B02G426200	C5	AT2G45900;AT3G61380	AT2G45900;AT3G61380	NA
TaDOF5.6	TraesCS1B02G222600	C6	AT2G45900;AT3G61380	AT2G45900;AT3G61380	NA
TaDOF5.6	TraesCS1A02G208600	C6	AT2G45900;AT3G61380	AT2G45900;AT3G61380	NA
TaDOF5.6	TraesCS1D02G185500	C1	AT2G46620	AT2G46620	NA
TaDOF5.6	TraesCS3A02G072600	C5	AT2G46850	AT2G46850	NA
TaDOF5.6	TraesCS4A02G171400	C6	AT2G47300	AT2G47300	NA
TaDOF5.6	TraesCS1B02G243700	C1	AT2G47630;AT3G62860	AT2G47630;AT3G62860	NA
TaDOF5.6	TraesCS1D02G250900	C5	AT2G48080;AT4G02940	AT2G48080;ALKBH10B	NA
TaDOF5.6	TraesCS2B02G341100	C1	AT3G01260;AT3G47800;AT5G15140	AT3G01260;AT3G47800;AT5G15140	NA
TaDOF5.6	TraesCS2A02G343500	C1	AT3G01260;AT3G47800;AT5G15140	AT3G01260;AT3G47800;AT5G15140	NA
TaDOF5.6	TraesCS2D02G321900	C5	AT3G01260;AT3G47800;AT5G15140	AT3G01260;AT3G47800;AT5G15140	NA
TaDOF5.6	TraesCS7B02G067000	C5	AT3G01260;AT3G47800;AT5G15140	AT3G01260;AT3G47800;AT5G15140	NA
TaDOF5.6	TraesCS7D02G163100	C5	AT3G01260;AT3G47800;AT5G15140	AT3G01260;AT3G47800;AT5G15140	NA
TaDOF5.6	TraesCS7D02G163500	C5	AT3G01260;AT3G47800;AT5G15140	AT3G01260;AT3G47800;AT5G15140	NA
TaDOF5.6	TraesCS2B02G341400	C5	AT3G01260;AT3G47800;AT5G15140	AT3G01260;AT3G47800;AT5G15140	NA
TaDOF5.6	TraesCS4A02G283200	C2	AT3G01310;AT5G15070	AT3G01310;AT5G15070	NA
TaDOF5.6	TraesCS4B02G030400	C2	AT3G01310;AT5G15070	AT3G01310;AT5G15070	NA
TaDOF5.6	TraesCS4D02G027800	C2	AT3G01310;AT5G15070	AT3G01310;AT5G15070	NA
TaDOF5.6	TraesCS6B02G301700	C1	AT3G01520;AT5G14680	AT3G01520;AT5G14680	NA
TaDOF5.6	TraesCS7D02G262200	C1	AT3G01930;AT5G50520;AT5G50630	AT3G01930;AT5G50520;AT5G50630	NA
TaDOF5.6	TraesCS5D02G536000	C1	AT3G01980	AT3G01980	NA
TaDOF5.6	TraesCS2D02G288100	C1	AT3G02070	AT3G02070	NA
TaDOF5.6	TraesCS2A02G290200	C1	AT3G02070	AT3G02070	NA
TaDOF5.6	TraesCS1B02G290300	C6	AT3G02370;AT3G57360	AT3G02370;AT3G57360	NA
TaDOF5.6	TraesCS6A02G193100	C5	AT3G02750	AT3G02750	NA
TaDOF5.6	TraesCS6B02G229600	C5	AT3G02750	AT3G02750	NA
TaDOF5.6	TraesCS4A02G323800	C6	AT3G02910	AT3G02910	NA
TaDOF5.6	TraesCS2A02G448000	C1	AT3G02930;AT4G27595;AT5G16730	AT3G02930;AT4G27595;AT5G16730	NA
TaDOF5.6	TraesCS6B02G354400	C1	AT3G03270	AT3G03270	NA
TaDOF5.6	TraesCS6D02G303600	C1	AT3G03270	AT3G03270	NA
TaDOF5.6	TraesCS3D02G394400	C6	AT3G03305	AT3G03305	NA
TaDOF5.6	TraesCS5A02G512400	C6	AT3G04350;AT5G18490	AT3G04350;AT5G18490	NA
TaDOF5.6	TraesCS5A02G456500	C5	AT3G04860;AT5G28150	AT3G04860;AT5G28150	NA
TaDOF5.6	TraesCS4D02G163600	C6	AT3G04930;AT5G28040	AT3G04930;AT5G28040	GeBP
TaDOF5.6	TraesCS4A02G366000	C5	AT3G05600;AT4G15955;AT4G15960	AT3G05600;AT4G15955;AT4G15960	NA
TaDOF5.6	TraesCS5B02G507300	C5	AT3G05600;AT4G15955;AT4G15960	AT3G05600;AT4G15955;AT4G15960	NA
TaDOF5.6	TraesCS6B02G297300	C5	AT3G06060;AT5G19200	AT3G06060;TSC10B	NA
TaDOF5.6	TraesCS6D02G245000	C5	AT3G06060;AT5G19200	AT3G06060;TSC10B	NA
TaDOF5.6	TraesCS7A02G081000	C6	AT3G06670;AT5G49390	AT3G06670;AT5G49390	NA
TaDOF5.6	TraesCS5A02G090800	C1	AT3G06770;AT3G16850;AT5G49215	AT3G06770;AT3G16850;AT5G49215	NA
TaDOF5.6	TraesCS4B02G144700	C5	AT3G06770;AT3G16850;AT5G49215	AT3G06770;AT3G16850;AT5G49215	NA
TaDOF5.6	TraesCS1A02G134500	C6	AT3G06950	AT3G06950	NA
TaDOF5.6	TraesCS3D02G407300	C6	AT3G07180	AT3G07180	NA
TaDOF5.6	TraesCS5B02G279000	C2	AT3G07320;AT3G23770;AT4G14080	AT3G07320;AT3G23770;A6	NA
TaDOF5.6	TraesCS3A02G420900	C1	AT3G07350;AT3G25240	AT3G07350;AT3G25240	NA
TaDOF5.6	TraesCS3D02G416400	C1	AT3G07350;AT3G25240	AT3G07350;AT3G25240	NA
TaDOF5.6	TraesCS3A02G414700	C6	AT3G07530	AT3G07530	NA
TaDOF5.6	TraesCS3D02G409200	C6	AT3G07530	AT3G07530	NA
TaDOF5.6	TraesCS2D02G350200	C5	AT3G07570	AT3G07570	NA
TaDOF5.6	TraesCS5B02G036900	C2	AT3G07620;AT5G03795	AT3G07620;AT5G03795	NA
TaDOF5.6	TraesCS5D02G044500	C2	AT3G07620;AT5G03795	AT3G07620;AT5G03795	NA
TaDOF5.6	TraesCS5A02G036300	C2	AT3G07620;AT5G03795	AT3G07620;AT5G03795	NA
TaDOF5.6	TraesCS7D02G302500	C6	AT3G07750	AT3G07750	NA
TaDOF5.6	TraesCS4A02G150600	C6	AT3G07810;AT4G26650;AT5G55550	AT3G07810;AT4G26650;AT5G55550	NA
TaDOF5.6	TraesCS2D02G197500	C6	AT3G07810;AT4G26650;AT5G55550	AT3G07810;AT4G26650;AT5G55550	NA
TaDOF5.6	TraesCSU02G068500	C6	AT3G07810;AT4G26650;AT5G55550	AT3G07810;AT4G26650;AT5G55550	NA
TaDOF5.6	TraesCS4D02G152200	C6	AT3G07810;AT4G26650;AT5G55550	AT3G07810;AT4G26650;AT5G55550	NA
TaDOF5.6	TraesCS1A02G133400	C6	AT3G08650	AT3G08650	NA
TaDOF5.6	TraesCS5A02G084000	C5	AT3G09470	AT3G09470	NA
TaDOF5.6	TraesCS6D02G033100	C6	AT3G10080	AT3G10080	NA
TaDOF5.6	TraesCS5D02G142800	C1	AT3G10300;AT5G04170	AT3G10300;CML50	NA
TaDOF5.6	TraesCS1A02G275800	C1	AT3G10580;AT3G10590;AT4G09450	AT3G10580;AT3G10590;AT4G09450	MYB_related
TaDOF5.6	TraesCS1B02G285000	C1	AT3G10580;AT3G10590;AT4G09450	AT3G10580;AT3G10590;AT4G09450	MYB_related
TaDOF5.6	TraesCS2B02G299400	C2	AT3G11590;AT5G22310	AT3G11590;AT5G22310	NA
TaDOF5.6	TraesCS2B02G266200	C5	AT3G11780;AT5G06480	AT3G11780;AT5G06480	NA
TaDOF5.6	TraesCS5B02G427700	C6	AT3G11800	AT3G11800	NA
TaDOF5.6	TraesCS5A02G389700	C1	AT3G11930;AT3G58450	AT3G11930;AT3G58450	NA
TaDOF5.6	TraesCS5D02G399600	C1	AT3G11930;AT3G58450	AT3G11930;AT3G58450	NA
TaDOF5.6	TraesCS5D02G399500	C5	AT3G11930;AT3G58450	AT3G11930;AT3G58450	NA
TaDOF5.6	TraesCS7A02G167100	C1	AT3G12020;AT5G06670	AT3G12020;AT5G06670	NA
TaDOF5.6	TraesCS5B02G302100	C6	AT3G12370;AT5G13510	AT3G12370;RPL10	NA
TaDOF5.6	TraesCS3D02G470500	C6	AT3G12390;AT5G13850	AT3G12390;NACA3	NA
TaDOF5.6	TraesCS6A02G161500	C5	AT3G13235	AT3G13235	NA
TaDOF5.6	TraesCS5B02G153900	C5	AT3G13560	AT3G13560	NA
TaDOF5.6	TraesCS7A02G159500	C1	AT3G14200	AT3G14200	NA
TaDOF5.6	TraesCS7D02G160400	C1	AT3G14200	AT3G14200	NA
TaDOF5.6	TraesCS1A02G392200	C5	AT3G14880	AT3G14880	NA
TaDOF5.6	TraesCS6B02G410500	C1	AT3G15900	AT3G15900	NA
TaDOF5.6	TraesCS2A02G290500	C5	AT3G16560	AT3G16560	NA
TaDOF5.6	TraesCS3A02G333200	C6	AT3G16680;AT3G22320	AT3G16680;NRPB5A	NA
TaDOF5.6	TraesCS5A02G552600	C1	AT3G17680	AT3G17680	NA
TaDOF5.6	TraesCSU02G125000	C1	AT3G17680	AT3G17680	NA
TaDOF5.6	TraesCS3B02G496800	C2	AT3G17680	AT3G17680	NA
TaDOF5.6	TraesCS4B02G241700	C6	AT3G17830	AT3G17830	NA
TaDOF5.6	TraesCS2A02G442600	C2	AT3G18170;AT3G18180	AT3G18170;AT3G18180	NA
TaDOF5.6	TraesCS3B02G023700	C5	AT3G18170;AT3G18180	AT3G18170;AT3G18180	NA
TaDOF5.6	TraesCS3D02G023200	C5	AT3G18170;AT3G18180	AT3G18170;AT3G18180	NA
TaDOF5.6	TraesCS3A02G023000	C5	AT3G18170;AT3G18180	AT3G18170;AT3G18180	NA
TaDOF5.6	TraesCS5A02G056000	C6	AT3G18170;AT3G18180	AT3G18170;AT3G18180	NA
TaDOF5.6	TraesCS5B02G079100	C5	AT3G19553	AT3G19553	NA
TaDOF5.6	TraesCS5A02G073000	C6	AT3G19553	AT3G19553	NA
TaDOF5.6	TraesCS6A02G415200	C6	AT3G19895	AT3G19895	NA
TaDOF5.6	TraesCS7A02G561600	C6	AT3G19970	AT3G19970	NA
TaDOF5.6	TraesCS7D02G411000	C2	AT3G20220	AT3G20220	NA
TaDOF5.6	TraesCS5A02G274600	C6	AT3G20240	AT3G20240	NA
TaDOF5.6	TraesCS2A02G222600	C1	AT3G20390	AT3G20390	NA
TaDOF5.6	TraesCS6B02G229300	C5	AT3G20920	AT3G20920	NA
TaDOF5.6	TraesCS3B02G497900	C1	AT3G21420	AT3G21420	NA
TaDOF5.6	TraesCS1D02G235500	C2	AT3G21450	AT3G21450	NA
TaDOF5.6	TraesCS7D02G458200	C6	AT3G22260	AT3G22260	NA
TaDOF5.6	TraesCS5A02G438800	C1	AT3G22850;AT5G43830	AT3G22850;AT5G43830	NA
TaDOF5.6	TraesCS5D02G451900	C1	AT3G23090	AT3G23090	NA
TaDOF5.6	TraesCS2A02G544800	C2	AT3G23460;AT3G23470;AT3G23480;AT3G23510;AT3G23530	AT3G23460;AT3G23470;AT3G23480;AT3G23510;AT3G23530	NA
TaDOF5.6	TraesCS2A02G545000	C5	AT3G23460;AT3G23470;AT3G23480;AT3G23510;AT3G23530	AT3G23460;AT3G23470;AT3G23480;AT3G23510;AT3G23530	NA
TaDOF5.6	TraesCS2D02G545700	C6	AT3G23460;AT3G23470;AT3G23480;AT3G23510;AT3G23530	AT3G23460;AT3G23470;AT3G23480;AT3G23510;AT3G23530	NA
TaDOF5.6	TraesCS1B02G260800	C1	AT3G23570;AT3G23600	AT3G23570;AT3G23600	NA
TaDOF5.6	TraesCS1A02G249600	C6	AT3G23570;AT3G23600	AT3G23570;AT3G23600	NA
TaDOF5.6	TraesCS1B02G260500	C6	AT3G23570;AT3G23600	AT3G23570;AT3G23600	NA
TaDOF5.6	TraesCS1B02G260400	C6	AT3G23570;AT3G23600	AT3G23570;AT3G23600	NA
TaDOF5.6	TraesCS1B02G169600	C1	AT3G24180	AT3G24180	NA
TaDOF5.6	TraesCS1B02G205400	C6	AT3G24180	AT3G24180	NA
TaDOF5.6	TraesCS3D02G288100	C6	AT3G24450	AT3G24450	NA
TaDOF5.6	TraesCS7B02G022400	C5	AT3G24605	AT3G24605	NA
TaDOF5.6	TraesCS1B02G446000	C1	AT3G25640;AT5G23100	AT3G25640;AT5G23100	NA
TaDOF5.6	TraesCS7B02G195900	C1	AT3G25640;AT5G23100	AT3G25640;AT5G23100	NA
TaDOF5.6	TraesCS1A02G415800	C5	AT3G25640;AT5G23100	AT3G25640;AT5G23100	NA
TaDOF5.6	TraesCS1D02G423200	C5	AT3G25640;AT5G23100	AT3G25640;AT5G23100	NA
TaDOF5.6	TraesCS7D02G230700	C5	AT3G25640;AT5G23100	AT3G25640;AT5G23100	NA
TaDOF5.6	TraesCS3A02G231300	C6	AT3G25640;AT5G23100	AT3G25640;AT5G23100	NA
TaDOF5.6	TraesCS3D02G072400	C5	AT3G25670	AT3G25670	NA
TaDOF5.6	TraesCS2A02G005500	C5	AT3G26350	AT3G26350	NA
TaDOF5.6	TraesCS6D02G182700	C6	AT3G26670	AT3G26670	NA
TaDOF5.6	TraesCS3A02G443800	C5	AT3G26700	AT3G26700	NA
TaDOF5.6	TraesCS1D02G038300	C6	AT3G26760;AT3G26770	AT3G26760;AT3G26770	NA
TaDOF5.6	TraesCS1D02G132000	C6	AT3G27270;AT5G14285	AT3G27270;AT5G14285	NA
TaDOF5.6	TraesCS5B02G168500	C5	AT3G27325	AT3G27325	NA
TaDOF5.6	TraesCS5A02G171000	C5	AT3G27325	AT3G27325	NA
TaDOF5.6	TraesCS6D02G194500	C6	AT3G27390;AT5G40640	AT3G27390;AT5G40640	NA
TaDOF5.6	TraesCS6D02G080200	C1	AT3G27770	AT3G27770	NA
TaDOF5.6	TraesCS5A02G074200	C5	AT3G28570;AT3G28600;AT3G28610;AT5G40000	AT3G28570;AT3G28600;AT3G28610;AT5G40000	NA
TaDOF5.6	TraesCS1D02G256500	C5	AT3G28570;AT3G28600;AT3G28610;AT5G40000	AT3G28570;AT3G28600;AT3G28610;AT5G40000	NA
TaDOF5.6	TraesCS1B02G267700	C5	AT3G28570;AT3G28600;AT3G28610;AT5G40000	AT3G28570;AT3G28600;AT3G28610;AT5G40000	NA
TaDOF5.6	TraesCS6D02G285000	C1	AT3G28850;AT5G39865	AT3G28850;AT5G39865	NA
TaDOF5.6	TraesCS6A02G305800	C1	AT3G28850;AT5G39865	AT3G28850;AT5G39865	NA
TaDOF5.6	TraesCS3D02G091300	C1	AT3G43230	AT3G43230	NA
TaDOF5.6	TraesCS1D02G330700	C6	AT3G44160	AT3G44160	NA
TaDOF5.6	TraesCS4B02G175000	C5	AT3G45400	AT3G45400	NA
TaDOF5.6	TraesCS4B02G197400	C1	AT3G45620	AT3G45620	NA
TaDOF5.6	TraesCS3B02G612100	C1	AT3G46110;AT5G59790	AT3G46110;AT5G59790	NA
TaDOF5.6	TraesCS5D02G492600	C5	AT3G46450	AT3G46450	NA
TaDOF5.6	TraesCS3D02G273200	C5	AT3G46930;AT5G58950	AT3G46930;AT5G58950	NA
TaDOF5.6	TraesCS4D02G147800	C5	AT3G47550;AT5G62460	AT3G47550;AT5G62460	NA
TaDOF5.6	TraesCS2B02G049100	C1	AT3G50270;AT3G50280;AT3G50290;AT3G50300;AT5G38130;AT5G67150;AT5G67160	AT3G50270;AT3G50280;AT3G50290;AT3G50300;AT5G38130;AT5G67150;EPS1	NA
TaDOF5.6	TraesCS5B02G235700	C1	AT3G50340;AT5G67020	AT3G50340;AT5G67020	NA
TaDOF5.6	TraesCS5D02G244600	C1	AT3G50340;AT5G67020	AT3G50340;AT5G67020	NA
TaDOF5.6	TraesCS5B02G068600	C1	AT3G50390	AT3G50390	NA
TaDOF5.6	TraesCS5A02G063900	C5	AT3G50390	AT3G50390	NA
TaDOF5.6	TraesCS4B02G072300	C5	AT3G50390	AT3G50390	NA
TaDOF5.6	TraesCS6B02G352000	C1	AT3G50640;AT4G34419;AT5G66800	AT3G50640;AT4G34419;AT5G66800	NA
TaDOF5.6	TraesCS6A02G321300	C2	AT3G50640;AT4G34419;AT5G66800	AT3G50640;AT4G34419;AT5G66800	NA
TaDOF5.6	TraesCS5A02G404600	C1	AT3G50780	AT3G50780	NA
TaDOF5.6	TraesCS5D02G414700	C5	AT3G50780	AT3G50780	NA
TaDOF5.6	TraesCS2B02G226300	C5	AT3G50850;AT5G49560	AT3G50850;AT5G49560	NA
TaDOF5.6	TraesCS3A02G485100	C2	AT3G51930	AT3G51930	NA
TaDOF5.6	TraesCS3D02G190900	C5	AT3G52040	AT3G52040	NA
TaDOF5.6	TraesCS2D02G250900	C5	AT3G52060;AT5G22070	AT3G52060;AT5G22070	NA
TaDOF5.6	TraesCS2A02G583100	C5	AT3G52500	AT3G52500	NA
TaDOF5.6	TraesCS1D02G141800	C6	AT3G53180	AT3G53180	NA
TaDOF5.6	TraesCS1A02G143000	C6	AT3G53180	AT3G53180	NA
TaDOF5.6	TraesCS1D02G142400	C5	AT3G53190;AT3G54920;AT5G04310	AT3G53190;PMR6;AT5G04310	NA
TaDOF5.6	TraesCS1B02G161000	C5	AT3G53190;AT3G54920;AT5G04310	AT3G53190;PMR6;AT5G04310	NA
TaDOF5.6	TraesCS7B02G232500	C1	AT3G53850;AT5G02060	AT3G53850;AT5G02060	NA
TaDOF5.6	TraesCS1A02G282700	C5	AT3G53850;AT5G02060	AT3G53850;AT5G02060	NA
TaDOF5.6	TraesCS6B02G191000	C5	AT3G54240	AT3G54240	NA
TaDOF5.6	TraesCS6D02G152300	C5	AT3G54240	AT3G54240	NA
TaDOF5.6	TraesCS5D02G032900	C2	AT3G54750	AT3G54750	NA
TaDOF5.6	TraesCS3A02G316600	C2	AT3G54750	AT3G54750	NA
TaDOF5.6	TraesCS5B02G024300	C2	AT3G54750	AT3G54750	NA
TaDOF5.6	TraesCS3A02G539300	C6	AT3G55080	AT3G55080	NA
TaDOF5.6	TraesCS4D02G336400	C6	AT3G55160	AT3G55160	NA
TaDOF5.6	TraesCS2A02G079500	C5	AT3G55410;AT5G65750	AT3G55410;AT5G65750	NA
TaDOF5.6	TraesCS2B02G301400	C5	AT3G55410;AT5G65750	AT3G55410;AT5G65750	NA
TaDOF5.6	TraesCS2D02G076900	C5	AT3G55410;AT5G65750	AT3G55410;AT5G65750	NA
TaDOF5.6	TraesCS2A02G284400	C5	AT3G55410;AT5G65750	AT3G55410;AT5G65750	NA
TaDOF5.6	TraesCS2D02G283300	C5	AT3G55410;AT5G65750	AT3G55410;AT5G65750	NA
TaDOF5.6	TraesCS2D02G132100	C2	AT3G57060	AT3G57060	NA
TaDOF5.6	TraesCS2B02G152100	C2	AT3G57060	AT3G57060	NA
TaDOF5.6	TraesCS6D02G381200	C5	AT3G57120	AT3G57120	NA
TaDOF5.6	TraesCS5A02G412100	C6	AT3G57170	AT3G57170	NA
TaDOF5.6	TraesCS4A02G013700	C5	AT3G57630	AT3G57630	NA
TaDOF5.6	TraesCS3D02G272300	C5	AT3G58760;AT4G18950	AT3G58760;AT4G18950	NA
TaDOF5.6	TraesCS7B02G164400	C5	AT3G59310;AT3G59320;AT3G59330;AT3G59340	AT3G59310;AT3G59320;AT3G59330;AT3G59340	NA
TaDOF5.6	TraesCS1B02G224200	C5	AT3G60510	AT3G60510	NA
TaDOF5.6	TraesCS2B02G262400	C1	AT3G60950;AT3G61030;AT3G61050	AT3G60950;AT3G61030;NTMC2TYPE4	NA
TaDOF5.6	TraesCS3D02G121600	C1	AT3G62160	AT3G62160	NA
TaDOF5.6	TraesCS7D02G352200	C1	AT3G62160	AT3G62160	NA
TaDOF5.6	TraesCS3B02G138900	C1	AT3G62160	AT3G62160	NA
TaDOF5.6	TraesCS1D02G120000	C5	AT3G62160	AT3G62160	NA
TaDOF5.6	TraesCS3B02G251100	C5	AT3G62160	AT3G62160	NA
TaDOF5.6	TraesCS7A02G318400	C5	AT3G62160	AT3G62160	NA
TaDOF5.6	TraesCS7D02G315000	C6	AT3G62160	AT3G62160	NA
TaDOF5.6	TraesCS4B02G001500	C6	AT3G62160	AT3G62160	NA
TaDOF5.6	TraesCS1A02G119100	C6	AT3G62160	AT3G62160	NA
TaDOF5.6	TraesCS5A02G066300	C5	AT3G62940	AT3G62940	NA
TaDOF5.6	TraesCS5A02G095000	C6	AT3G62970;AT5G18650	AT3G62970;MIEL1	NA
TaDOF5.6	TraesCS5B02G101200	C6	AT3G62970;AT5G18650	AT3G62970;MIEL1	NA
TaDOF5.6	TraesCS5D02G107600	C6	AT3G62970;AT5G18650	AT3G62970;MIEL1	NA
TaDOF5.6	TraesCS7B02G355800	C1	AT3G63430	AT3G63430	NA
TaDOF5.6	TraesCS2D02G398400	C5	AT4G00740	AT4G00740	NA
TaDOF5.6	TraesCS2B02G419000	C5	AT4G00740	AT4G00740	NA
TaDOF5.6	TraesCS7A02G341500	C1	AT4G00910	AT4G00910	NA
TaDOF5.6	TraesCS2D02G154500	C1	AT4G01870	AT4G01870	NA
TaDOF5.6	TraesCS2D02G537000	C6	AT4G01897	AT4G01897	NA
TaDOF5.6	TraesCS2A02G387500	C6	AT4G02110	AT4G02110	NA
TaDOF5.6	TraesCS7A02G344700	C6	AT4G02400;AT5G08600	AT4G02400;AT5G08600	NA
TaDOF5.6	TraesCS1D02G320800	C5	AT4G03230	AT4G03230	NA
TaDOF5.6	TraesCS2B02G282500	C6	AT4G03260	AT4G03260	NA
TaDOF5.6	TraesCS2D02G264300	C6	AT4G03260	AT4G03260	NA
TaDOF5.6	TraesCS6B02G341600	C6	AT4G04180	AT4G04180	NA
TaDOF5.6	TraesCS6A02G311400	C6	AT4G04180	AT4G04180	NA
TaDOF5.6	TraesCS3D02G276900	C2	AT4G07670;AT5G19740	AT4G07670;LAMP1	NA
TaDOF5.6	TraesCS3A02G276800	C2	AT4G07670;AT5G19740	AT4G07670;LAMP1	NA
TaDOF5.6	TraesCS3D02G277000	C2	AT4G07670;AT5G19740	AT4G07670;LAMP1	NA
TaDOF5.6	TraesCS2D02G309000	C1	AT4G10000	AT4G10000	NA
TaDOF5.6	TraesCS5B02G190200	C2	AT4G10890	AT4G10890	NA
TaDOF5.6	TraesCS3B02G266200	C1	AT4G11040	AT4G11040	NA
TaDOF5.6	TraesCS3D02G238000	C1	AT4G11040	AT4G11040	NA
TaDOF5.6	TraesCS4B02G003400	C1	AT4G11410;AT4G23420;AT4G23430	AT4G11410;AT4G23420;TIC32	NA
TaDOF5.6	TraesCS2D02G398800	C6	AT4G11670	AT4G11670	NA
TaDOF5.6	TraesCS5B02G369300	C5	AT4G11800;AT4G23000	AT4G11800;AT4G23000	NA
TaDOF5.6	TraesCS5A02G367000	C5	AT4G11800;AT4G23000	AT4G11800;AT4G23000	NA
TaDOF5.6	TraesCS6A02G276300	C6	AT4G11900	AT4G11900	NA
TaDOF5.6	TraesCS6D02G256700	C6	AT4G11900	AT4G11900	NA
TaDOF5.6	TraesCS7D02G060500	C2	AT4G11990;AT4G22860	AT4G11990;AT4G22860	NA
TaDOF5.6	TraesCS6B02G286100	C1	AT4G12410;AT4G22620	AT4G12410;AT4G22620	NA
TaDOF5.6	TraesCS7A02G220700	C2	AT4G12680	AT4G12680	NA
TaDOF5.6	TraesCS7B02G126700	C2	AT4G12680	AT4G12680	NA
TaDOF5.6	TraesCS7D02G221400	C2	AT4G12680	AT4G12680	NA
TaDOF5.6	TraesCS3A02G426500	C5	AT4G12840;AT4G18530	AT4G12840;AT4G18530	NA
TaDOF5.6	TraesCS3B02G462700	C5	AT4G12840;AT4G18530	AT4G12840;AT4G18530	NA
TaDOF5.6	TraesCS6B02G202800	C1	AT4G13150	AT4G13150	NA
TaDOF5.6	TraesCS7B02G301400	C5	AT4G13780	AT4G13780	NA
TaDOF5.6	TraesCS6B02G062400	C5	AT4G14570	AT4G14570	NA
TaDOF5.6	TraesCS6D02G053400	C5	AT4G14570	AT4G14570	NA
TaDOF5.6	TraesCS3B02G485700	C2	AT4G15830	AT4G15830	NA
TaDOF5.6	TraesCS5B02G493100	C2	AT4G15890	AT4G15890	NA
TaDOF5.6	TraesCS6B02G304200	C5	AT4G16660	AT4G16660	NA
TaDOF5.6	TraesCS7B02G288200	C5	AT4G17085	AT4G17085	NA
TaDOF5.6	TraesCS4B02G016000	C1	AT4G17410;AT5G47430	AT4G17410;AT5G47430	NA
TaDOF5.6	TraesCS6B02G282100	C5	AT4G17550	AT4G17550	NA
TaDOF5.6	TraesCS6B02G282200	C1	AT4G17560;AT5G47190	AT4G17560;AT5G47190	NA
TaDOF5.6	TraesCS6B02G113900	C1	AT4G17580;AT5G47120;AT5G47130	AT4G17580;BI-1;AT5G47130	NA
TaDOF5.6	TraesCS1A02G245300	C6	AT4G17620	AT4G17620	NA
TaDOF5.6	TraesCS3B02G342400	C5	AT4G17650	AT4G17650	NA
TaDOF5.6	TraesCS2D02G446700	C1	AT4G17790	AT4G17790	NA
TaDOF5.6	TraesCS2B02G468200	C1	AT4G17790	AT4G17790	NA
TaDOF5.6	TraesCS1B02G226800	C5	AT4G18030	AT4G18030	NA
TaDOF5.6	TraesCS1D02G216200	C6	AT4G18030	AT4G18030	NA
TaDOF5.6	TraesCS3A02G306200	C1	AT4G18660;AT4G18680;AT4G18690;AT5G45830	AT4G18660;AT4G18680;DOGL3;DOG1	NA
TaDOF5.6	TraesCS1D02G352300	C1	AT4G18820;AT5G45720	AT4G18820;AT5G45720	NA
TaDOF5.6	TraesCS2D02G433700	C1	AT4G19410;AT5G45280	AT4G19410;PAE11	NA
TaDOF5.6	TraesCS6D02G244700	C5	AT4G19420	AT4G19420	NA
TaDOF5.6	TraesCS6B02G080000	C5	AT4G19880;AT5G44990;AT5G45020	AT4G19880;AT5G44990;AT5G45020	NA
TaDOF5.6	TraesCS2B02G251800	C1	AT4G20150	AT4G20150	NA
TaDOF5.6	TraesCS5D02G266100	C6	AT4G20740	AT4G20740	NA
TaDOF5.6	TraesCS3A02G374700	C5	AT4G20820;AT5G44410;AT5G44440	AT4G20820;AT5G44410;AT5G44440	NA
TaDOF5.6	TraesCS2B02G369200	C5	AT4G21192	AT4G21192	NA
TaDOF5.6	TraesCS4A02G371600	C1	AT4G22740	AT4G22740	NA
TaDOF5.6	TraesCS7B02G215500	C1	AT4G22740	AT4G22740	NA
TaDOF5.6	TraesCS7A02G269200	C5	AT4G22980;AT5G51920	AT4G22980;AT5G51920	NA
TaDOF5.6	TraesCS3B02G253000	C1	AT4G23820;AT5G41870	AT4G23820;AT5G41870	NA
TaDOF5.6	TraesCS7A02G484700	C1	AT4G24110	AT4G24110	NA
TaDOF5.6	TraesCS6B02G344300	C1	AT4G24610;AT5G65440	AT4G24610;AT5G65440	NA
TaDOF5.6	TraesCS6A02G314400	C2	AT4G24610;AT5G65440	AT4G24610;AT5G65440	NA
TaDOF5.6	TraesCS6D02G293700	C2	AT4G24610;AT5G65440	AT4G24610;AT5G65440	NA
TaDOF5.6	TraesCS2A02G325700	C2	AT4G24710	AT4G24710	NA
TaDOF5.6	TraesCS7D02G278000	C1	AT4G24730	AT4G24730	NA
TaDOF5.6	TraesCS5D02G394800	C6	AT4G25030;AT5G45410	AT4G25030;AT5G45410	NA
TaDOF5.6	TraesCSU02G065800	C6	AT4G25660;AT4G25680	AT4G25660;AT4G25680	NA
TaDOF5.6	TraesCS2D02G432900	C5	AT4G25900;AT5G57330	AT4G25900;AT5G57330	NA
TaDOF5.6	TraesCS2A02G501600	C5	AT4G25900;AT5G57330	AT4G25900;AT5G57330	NA
TaDOF5.6	TraesCS3A02G349100	C1	AT4G26120	AT4G26120	NA
TaDOF5.6	TraesCS3B02G381300	C1	AT4G26120	AT4G26120	NA
TaDOF5.6	TraesCS3D02G192800	C5	AT4G26390;AT5G56350	AT4G26390;AT5G56350	NA
TaDOF5.6	TraesCS6D02G266300	C1	AT4G26480;AT5G56140	AT4G26480;AT5G56140	NA
TaDOF5.6	TraesCS2B02G053600	C5	AT4G26910;AT5G55070	AT4G26910;AT5G55070	NA
TaDOF5.6	TraesCS4D02G070200	C5	AT4G26910;AT5G55070	AT4G26910;AT5G55070	NA
TaDOF5.6	TraesCS2A02G041100	C5	AT4G26910;AT5G55070	AT4G26910;AT5G55070	NA
TaDOF5.6	TraesCS4A02G243500	C5	AT4G26910;AT5G55070	AT4G26910;AT5G55070	NA
TaDOF5.6	TraesCS2D02G039500	C5	AT4G26910;AT5G55070	AT4G26910;AT5G55070	NA
TaDOF5.6	TraesCS5B02G572700	C6	AT4G27100;AT5G54780	AT4G27100;AT5G54780	NA
TaDOF5.6	TraesCS4A02G087400	C5	AT4G27640	AT4G27640	NA
TaDOF5.6	TraesCS1B02G478700	C5	AT4G27900;AT5G53420	AT4G27900;AT5G53420	NA
TaDOF5.6	TraesCS2B02G282300	C6	AT4G28200	AT4G28200	NA
TaDOF5.6	TraesCS1B02G422400	C1	AT4G28300	AT4G28300	NA
TaDOF5.6	TraesCS1D02G402000	C1	AT4G28300	AT4G28300	NA
TaDOF5.6	TraesCS7A02G121800	C6	AT4G28830	AT4G28830	NA
TaDOF5.6	TraesCS3A02G209100	C1	AT4G29780;AT5G12010	AT4G29780;AT5G12010	NA
TaDOF5.6	TraesCS3B02G239400	C1	AT4G29780;AT5G12010	AT4G29780;AT5G12010	NA
TaDOF5.6	TraesCS3D02G212000	C1	AT4G29780;AT5G12010	AT4G29780;AT5G12010	NA
TaDOF5.6	TraesCS1B02G475800	C6	AT4G29780;AT5G12010	AT4G29780;AT5G12010	NA
TaDOF5.6	TraesCS1A02G441100	C6	AT4G29780;AT5G12010	AT4G29780;AT5G12010	NA
TaDOF5.6	TraesCS7B02G050000	C2	AT4G30993	AT4G30993	NA
TaDOF5.6	TraesCS2B02G542100	C6	AT4G31930	AT4G31930	NA
TaDOF5.6	TraesCS1D02G391000	C1	AT4G32590	AT4G32590	NA
TaDOF5.6	TraesCS3B02G182000	C1	AT4G32780	AT4G32780	NA
TaDOF5.6	TraesCS6D02G178400	C1	AT4G32950;AT5G26010	AT4G32950;AT5G26010	NA
TaDOF5.6	TraesCS2D02G178700	C1	AT4G33180;AT5G21950	AT4G33180;AT5G21950	NA
TaDOF5.6	TraesCS5D02G408500	C1	AT4G33920	AT4G33920	NA
TaDOF5.6	TraesCS2D02G267900	C1	AT4G34215	AT4G34215	NA
TaDOF5.6	TraesCS2B02G287700	C5	AT4G34215	AT4G34215	NA
TaDOF5.6	TraesCS4A02G003600	C1	AT4G34310	AT4G34310	NA
TaDOF5.6	TraesCS4A02G040000	C1	AT4G34320;AT4G34330	AT4G34320;AT4G34330	NA
TaDOF5.6	TraesCS4B02G261200	C1	AT4G34320;AT4G34330	AT4G34320;AT4G34330	NA
TaDOF5.6	TraesCS2D02G026900	C1	AT4G34880	AT4G34880	NA
TaDOF5.6	TraesCS2B02G036100	C5	AT4G34880	AT4G34880	NA
TaDOF5.6	TraesCS5D02G340300	C1	AT4G35880	AT4G35880	NA
TaDOF5.6	TraesCS2A02G067500	C5	AT4G35880	AT4G35880	NA
TaDOF5.6	TraesCS2B02G335000	C5	AT4G37030	AT4G37030	NA
TaDOF5.6	TraesCS2B02G075000	C1	AT4G38300;AT4G38650	AT4G38300;AT4G38650	NA
TaDOF5.6	TraesCS6D02G301200	C6	AT4G39280	AT4G39280	NA
TaDOF5.6	TraesCS1B02G140100	C2	AT4G39470	AT4G39470	NA
TaDOF5.6	TraesCS2D02G167700	C5	AT4G39680	AT4G39680	NA
TaDOF5.6	TraesCS1D02G293000	C1	AT5G01670	AT5G01670	NA
TaDOF5.6	TraesCS4D02G172900	C5	AT5G01940;AT5G20920	AT5G01940;EIF2B	NA
TaDOF5.6	TraesCS3A02G179000	C6	AT5G03430	AT5G03430	NA
TaDOF5.6	TraesCS5A02G547800	C2	AT5G03450;AT5G03750	AT5G03450;AT5G03750	NA
TaDOF5.6	TraesCS2B02G311500	C2	AT5G03870	AT5G03870	NA
TaDOF5.6	TraesCS5D02G550400	C1	AT5G04250	AT5G04250	NA
TaDOF5.6	TraesCS2D02G103800	C6	AT5G05160	AT5G05160	NA
TaDOF5.6	TraesCS1B02G258200	C5	AT5G05480	AT5G05480	NA
TaDOF5.6	TraesCS1A02G247800	C6	AT5G05480	AT5G05480	NA
TaDOF5.6	TraesCS3D02G362600	C1	AT5G05710	AT5G05710	NA
TaDOF5.6	TraesCS4D02G210700	C1	AT5G06060	AT5G06060	NA
TaDOF5.6	TraesCS3D02G193800	C6	AT5G06120	AT5G06120	NA
TaDOF5.6	TraesCS4B02G282900	C1	AT5G06610	AT5G06610	NA
TaDOF5.6	TraesCS2B02G515800	C2	AT5G06800	AT5G06800	G2-like
TaDOF5.6	TraesCS6D02G275600	C1	AT5G07330	AT5G07330	NA
TaDOF5.6	TraesCS6A02G101800	C2	AT5G07340;AT5G61790	AT5G07340;CNX1	NA
TaDOF5.6	TraesCS6B02G129800	C2	AT5G07340;AT5G61790	AT5G07340;CNX1	NA
TaDOF5.6	TraesCS6A02G351800	C6	AT5G07630	AT5G07630	NA
TaDOF5.6	TraesCS2B02G209500	C2	AT5G07650;AT5G07760;AT5G07770;AT5G07780	AT5G07650;AT5G07760;AT5G07770;FH19	NA
TaDOF5.6	TraesCSU02G033300	C6	AT5G07800;AT5G61290	AT5G07800;AT5G61290	NA
TaDOF5.6	TraesCS6A02G052500	C2	AT5G07910	AT5G07910	NA
TaDOF5.6	TraesCS7A02G560400	C1	AT5G08200;AT5G23130	AT5G08200;AT5G23130	NA
TaDOF5.6	TraesCS7D02G549400	C1	AT5G08200;AT5G23130	AT5G08200;AT5G23130	NA
TaDOF5.6	TraesCS3B02G003100	C1	AT5G08440;AT5G23490;AT5G23510	AT5G08440;AT5G23490;AT5G23510	NA
TaDOF5.6	TraesCS2A02G593000	C1	AT5G08570;AT5G63680	AT5G08570;AT5G63680	NA
TaDOF5.6	TraesCS6D02G174000	C2	AT5G08580	AT5G08580	NA
TaDOF5.6	TraesCS1A02G379000	C5	AT5G08670;AT5G08680;AT5G08690	AT5G08670;AT5G08680;AT5G08690	NA
TaDOF5.6	TraesCS1B02G400300	C5	AT5G08670;AT5G08680;AT5G08690	AT5G08670;AT5G08680;AT5G08690	NA
TaDOF5.6	TraesCS4B02G130200	C5	AT5G09225	AT5G09225	NA
TaDOF5.6	TraesCS2B02G553100	C5	AT5G09700;AT5G09730;AT5G64570	AT5G09700;BXL3;BXL4	NA
TaDOF5.6	TraesCS5A02G123700	C6	AT5G09840;AT5G64710	AT5G09840;AT5G64710	NA
TaDOF5.6	TraesCS2D02G167300	C1	AT5G10020	AT5G10020	NA
TaDOF5.6	TraesCS2B02G337400	C6	AT5G10320	AT5G10320	NA
TaDOF5.6	TraesCS3A02G218200	C6	AT5G11340	AT5G11340	NA
TaDOF5.6	TraesCS7A02G464200	C5	AT5G11720	AT5G11720	NA
TaDOF5.6	TraesCS7B02G364700	C5	AT5G11720	AT5G11720	NA
TaDOF5.6	TraesCS3B02G161200	C6	AT5G11870	AT5G11870	NA
TaDOF5.6	TraesCS3A02G489800	C5	AT5G12300	AT5G12300	NA
TaDOF5.6	TraesCS3B02G550300	C5	AT5G12300	AT5G12300	NA
TaDOF5.6	TraesCS5B02G262700	C1	AT5G13070	AT5G13070	NA
TaDOF5.6	TraesCS3D02G432600	C5	AT5G13420	AT5G13420	NA
TaDOF5.6	TraesCS3D02G082300	C5	AT5G14030	AT5G14030	NA
TaDOF5.6	TraesCS3B02G097200	C5	AT5G14030	AT5G14030	NA
TaDOF5.6	TraesCS5A02G439300	C6	AT5G14050	AT5G14050	NA
TaDOF5.6	TraesCS1A02G417800	C1	AT5G14700	AT5G14700	NA
TaDOF5.6	TraesCS5D02G402100	C5	AT5G15640	AT5G15640	NA
TaDOF5.6	TraesCS5A02G392300	C5	AT5G15640	AT5G15640	NA
TaDOF5.6	TraesCS1B02G109000	C6	AT5G17930	AT5G17930	NA
TaDOF5.6	TraesCS5B02G484400	C5	AT5G17980	AT5G17980	NA
TaDOF5.6	TraesCS4D02G147200	C1	AT5G18590	AT5G18590	NA
TaDOF5.6	TraesCS3A02G213900	C1	AT5G19590	AT5G19590	NA
TaDOF5.6	TraesCS4A02G279500	C5	AT5G19860	AT5G19860	NA
TaDOF5.6	TraesCS3B02G282700	C5	AT5G19860	AT5G19860	NA
TaDOF5.6	TraesCS4A02G182000	C5	AT5G19860	AT5G19860	NA
TaDOF5.6	TraesCS4D02G031400	C5	AT5G19860	AT5G19860	NA
TaDOF5.6	TraesCS7D02G142300	C6	AT5G20550;AT5G54000	AT5G20550;AT5G54000	NA
TaDOF5.6	TraesCS7B02G042200	C6	AT5G20550;AT5G54000	AT5G20550;AT5G54000	NA
TaDOF5.6	TraesCS5B02G557700	C5	AT5G20870	AT5G20870	NA
TaDOF5.6	TraesCS5D02G398400	C1	AT5G20940;AT5G20950	AT5G20940;AT5G20950	NA
TaDOF5.6	TraesCS5B02G393300	C6	AT5G20940;AT5G20950	AT5G20940;AT5G20950	NA
TaDOF5.6	TraesCS5B02G141000	C1	AT5G21060	AT5G21060	NA
TaDOF5.6	TraesCS7A02G361600	C5	AT5G21100;AT5G21105	AT5G21100;AT5G21105	NA
TaDOF5.6	TraesCS7D02G361300	C5	AT5G21100;AT5G21105	AT5G21100;AT5G21105	NA
TaDOF5.6	TraesCS4B02G292700	C5	AT5G21910	AT5G21910	NA
TaDOF5.6	TraesCS2D02G250800	C5	AT5G22050	AT5G22050	NA
TaDOF5.6	TraesCS1B02G029100	C1	AT5G22450	AT5G22450	NA
TaDOF5.6	TraesCS3D02G525200	C2	AT5G22450	AT5G22450	NA
TaDOF5.6	TraesCS3A02G232100	C1	AT5G22480;AT5G37340	AT5G22480;AT5G37340	NA
TaDOF5.6	TraesCS3B02G261400	C1	AT5G22480;AT5G37340	AT5G22480;AT5G37340	NA
TaDOF5.6	TraesCS3D02G221100	C1	AT5G22480;AT5G37340	AT5G22480;AT5G37340	NA
TaDOF5.6	TraesCS4B02G393600	C6	AT5G23760	AT5G23760	NA
TaDOF5.6	TraesCS4A02G312300	C1	AT5G23950	AT5G23950	NA
TaDOF5.6	TraesCS6B02G143000	C1	AT5G23950	AT5G23950	NA
TaDOF5.6	TraesCS4B02G001000	C5	AT5G23950	AT5G23950	NA
TaDOF5.6	TraesCS6A02G024000	C6	AT5G24680	AT5G24680	NA
TaDOF5.6	TraesCS6D02G027400	C6	AT5G24680	AT5G24680	NA
TaDOF5.6	TraesCS3A02G236500	C1	AT5G24710	AT5G24710	NA
TaDOF5.6	TraesCS3B02G263200	C5	AT5G24710	AT5G24710	NA
TaDOF5.6	TraesCS3D02G310600	C6	AT5G25800	AT5G25800	NA
TaDOF5.6	TraesCS1B02G104400	C6	AT5G27400;AT5G27410	AT5G27400;AT5G27410	NA
TaDOF5.6	TraesCS4B02G261800	C6	AT5G27470	AT5G27470	NA
TaDOF5.6	TraesCS4D02G084800	C6	AT5G27660	AT5G27660	NA
TaDOF5.6	TraesCS3A02G175500	C5	AT5G27820	AT5G27820	NA
TaDOF5.6	TraesCS7B02G308600	C6	AT5G34930	AT5G34930	NA
TaDOF5.6	TraesCS7D02G402100	C6	AT5G34930	AT5G34930	NA
TaDOF5.6	TraesCSU02G136100	C1	AT5G35370	AT5G35370	NA
TaDOF5.6	TraesCS7A02G242600	C1	AT5G35690	AT5G35690	NA
TaDOF5.6	TraesCS7B02G152000	C1	AT5G35735	AT5G35735	NA
TaDOF5.6	TraesCS7D02G254000	C1	AT5G35735	AT5G35735	NA
TaDOF5.6	TraesCS7A02G255700	C5	AT5G35735	AT5G35735	NA
TaDOF5.6	TraesCS7D02G254100	C5	AT5G35735	AT5G35735	NA
TaDOF5.6	TraesCS6B02G425600	C6	AT5G37360	AT5G37360	NA
TaDOF5.6	TraesCS7D02G207300	C1	AT5G37710	AT5G37710	NA
TaDOF5.6	TraesCS7B02G111200	C1	AT5G37710	AT5G37710	NA
TaDOF5.6	TraesCS2A02G281100	C1	AT5G38360	AT5G38360	NA
TaDOF5.6	TraesCS7B02G076700	C6	AT5G40670	AT5G40670	NA
TaDOF5.6	TraesCS5B02G549500	C1	AT5G40900	AT5G40900	NA
TaDOF5.6	TraesCS2A02G039700	C5	AT5G40900	AT5G40900	NA
TaDOF5.6	TraesCS7D02G371200	C5	AT5G41760	AT5G41760	NA
TaDOF5.6	TraesCS1A02G425400	C6	AT5G41800	AT5G41800	NA
TaDOF5.6	TraesCS1B02G459800	C6	AT5G41800	AT5G41800	NA
TaDOF5.6	TraesCS4D02G326100	C1	AT5G42290	AT5G42290	NA
TaDOF5.6	TraesCS4B02G329300	C2	AT5G42290	AT5G42290	NA
TaDOF5.6	TraesCS6B02G225100	C1	AT5G42370	AT5G42370	NA
TaDOF5.6	TraesCS5D02G414500	C5	AT5G42660	AT5G42660	NA
TaDOF5.6	TraesCS7B02G002900	C1	AT5G43310	AT5G43310	NA
TaDOF5.6	TraesCS5B02G568800	C5	AT5G43310	AT5G43310	NA
TaDOF5.6	TraesCS3B02G317300	C1	AT5G45640;AT5G45650	AT5G45640;SBT5.6	NA
TaDOF5.6	TraesCS5D02G565800	C6	AT5G46580	AT5G46580	NA
TaDOF5.6	TraesCS5B02G071400	C6	AT5G46850	AT5G46850	NA
TaDOF5.6	TraesCS6D02G248400	C1	AT5G46910	AT5G46910	NA
TaDOF5.6	TraesCS2B02G527900	C5	AT5G47510	AT5G47510	NA
TaDOF5.6	TraesCS2D02G500100	C5	AT5G47510	AT5G47510	NA
TaDOF5.6	TraesCS2B02G049200	C5	AT5G47720;AT5G48230	AT5G47720;AAT1	NA
TaDOF5.6	TraesCS3A02G471700	C1	AT5G48430	AT5G48430	NA
TaDOF5.6	TraesCS3D02G467300	C6	AT5G48430	AT5G48430	NA
TaDOF5.6	TraesCS7B02G055000	C2	AT5G48520	AT5G48520	NA
TaDOF5.6	TraesCS6A02G162200	C6	AT5G48550	AT5G48550	NA
TaDOF5.6	TraesCS4A02G140300	C6	AT5G49110	AT5G49110	NA
TaDOF5.6	TraesCS4D02G169300	C6	AT5G49110	AT5G49110	NA
TaDOF5.6	TraesCS3A02G172100	C5	AT5G49320	AT5G49320	NA
TaDOF5.6	TraesCS3D02G095200	C5	AT5G49750;AT5G49760;AT5G49770;AT5G49780	AT5G49750;AT5G49760;AT5G49770;AT5G49780	NA
TaDOF5.6	TraesCS3D02G399200	C1	AT5G49840	AT5G49840	NA
TaDOF5.6	TraesCS3D02G432000	C5	AT5G50860	AT5G50860	NA
TaDOF5.6	TraesCS3D02G290700	C2	AT5G50890	AT5G50890	NA
TaDOF5.6	TraesCS3B02G477700	C6	AT5G51030;AT5G61830	AT5G51030;AT5G61830	NA
TaDOF5.6	TraesCS7A02G266800	C5	AT5G51130	AT5G51130	NA
TaDOF5.6	TraesCS7B02G165600	C5	AT5G51130	AT5G51130	NA
TaDOF5.6	TraesCS7D02G268000	C5	AT5G51130	AT5G51130	NA
TaDOF5.6	TraesCS2D02G097300	C6	AT5G52800	AT5G52800	NA
TaDOF5.6	TraesCS2D02G071400	C1	AT5G52970	AT5G52970	NA
TaDOF5.6	TraesCS1B02G209300	C5	AT5G52980	AT5G52980	NA
TaDOF5.6	TraesCS1A02G363800	C5	AT5G53050	AT5G53050	NA
TaDOF5.6	TraesCS3B02G289900	C6	AT5G55100	AT5G55100	NA
TaDOF5.6	TraesCS3D02G257000	C6	AT5G55100	AT5G55100	NA
TaDOF5.6	TraesCS7D02G219800	C5	AT5G55950	AT5G55950	NA
TaDOF5.6	TraesCS3D02G277800	C1	AT5G56610	AT5G56610	NA
TaDOF5.6	TraesCS7D02G101700	C6	AT5G56610	AT5G56610	NA
TaDOF5.6	TraesCS1D02G220500	C6	AT5G56840	AT5G56840	MYB_related
TaDOF5.6	TraesCS3B02G280500	C5	AT5G56890	AT5G56890	NA
TaDOF5.6	TraesCS3A02G251000	C5	AT5G56890	AT5G56890	NA
TaDOF5.6	TraesCS2B02G248400	C1	AT5G57700	AT5G57700	NA
TaDOF5.6	TraesCS2D02G228900	C5	AT5G57700	AT5G57700	NA
TaDOF5.6	TraesCS3B02G184900	C5	AT5G58000	AT5G58000	NA
TaDOF5.6	TraesCS6D02G097400	C1	AT5G58110	AT5G58110	NA
TaDOF5.6	TraesCS4D02G174500	C1	AT5G58250	AT5G58250	NA
TaDOF5.6	TraesCS3A02G349200	C5	AT5G58530	AT5G58530	NA
TaDOF5.6	TraesCS1D02G224800	C1	AT5G58575	AT5G58575	NA
TaDOF5.6	TraesCS1A02G223200	C1	AT5G58575	AT5G58575	NA
TaDOF5.6	TraesCS1B02G236500	C1	AT5G58575	AT5G58575	NA
TaDOF5.6	TraesCS6B02G425800	C6	AT5G62030	AT5G62030	NA
TaDOF5.6	TraesCS7D02G319100	C1	AT5G63620	AT5G63620	NA
TaDOF5.6	TraesCS7A02G134700	C2	AT5G63710	AT5G63710	NA
TaDOF5.6	TraesCS4A02G220100	C2	AT5G63960	AT5G63960	NA
TaDOF5.6	TraesCS5B02G049400	C6	AT5G64150	AT5G64150	NA
TaDOF5.6	TraesCS7A02G177100	C1	AT5G65290	AT5G65290	NA
TaDOF5.6	TraesCS6D02G222100	C5	AT5G66330	AT5G66330	NA
TaDOF5.6	TraesCS4B02G063600	C6	AT5G66590	AT5G66590	NA
TaDOF5.6	TraesCS6A02G072200	C1	AT5G66631	AT5G66631	NA
TaDOF5.6	TraesCS5B02G131500	C1	AT5G19140	ATAILP1	NA
TaDOF5.6	TraesCS5D02G139300	C1	AT5G19140	ATAILP1	NA
TaDOF5.6	TraesCS5A02G134000	C1	AT5G19140	ATAILP1	NA
TaDOF5.6	TraesCS4A02G149200	C5	AT3G22950	ATARFC1	NA
TaDOF5.6	TraesCS4B02G035800	C6	AT2G40090	ATATH9	NA
TaDOF5.6	TraesCS4A02G277100	C6	AT2G40090	ATATH9	NA
TaDOF5.6	TraesCS2B02G401900	C2	AT1G04020	ATBARD1	NA
TaDOF5.6	TraesCS2B02G175800	C1	AT5G21222	ATC401	NA
TaDOF5.6	TraesCS3B02G525300	C5	AT2G41510;AT3G63440	ATCKX1;CKX6	NA
TaDOF5.6	TraesCS7B02G115700	C5	AT5G50380	ATEXO70F1	NA
TaDOF5.6	TraesCS7B02G325400	C1	AT1G51640;AT4G31540	ATEXO70G2;ATEXO70G1	NA
TaDOF5.6	TraesCS7A02G424500	C1	AT1G51640;AT4G31540	ATEXO70G2;ATEXO70G1	NA
TaDOF5.6	TraesCS6B02G342200	C1	AT1G24150;AT1G59910;AT1G70140	ATFH4;FH7;FH8	NA
TaDOF5.6	TraesCS6B02G325400	C2	AT1G23210;AT1G70710	AtGH9B6;CEL1	NA
TaDOF5.6	TraesCS5D02G208900	C1	AT2G32990	AtGH9B8	NA
TaDOF5.6	TraesCS7A02G197900	C1	AT2G32990	AtGH9B8	NA
TaDOF5.6	TraesCS7B02G104600	C1	AT2G32990	AtGH9B8	NA
TaDOF5.6	TraesCS1A02G389300	C2	AT1G64390;AT4G11050	AtGH9C2;AtGH9C3	NA
TaDOF5.6	TraesCS4B02G104500	C2	AT1G64390;AT4G11050	AtGH9C2;AtGH9C3	NA
TaDOF5.6	TraesCS1D02G397400	C2	AT1G64390;AT4G11050	AtGH9C2;AtGH9C3	NA
TaDOF5.6	TraesCS5A02G558200	C1	AT1G33240;AT1G76880;AT1G76890	AT-GTL1;AT1G76880;GT-2	Trihelix
TaDOF5.6	TraesCS2A02G389200	C1	AT1G33240;AT1G76880;AT1G76890	AT-GTL1;AT1G76880;GT-2	Trihelix
TaDOF5.6	TraesCS2D02G387100	C1	AT1G33240;AT1G76880;AT1G76890	AT-GTL1;AT1G76880;GT-2	Trihelix
TaDOF5.6	TraesCS2B02G407400	C1	AT1G33240;AT1G76880;AT1G76890	AT-GTL1;AT1G76880;GT-2	Trihelix
TaDOF5.6	TraesCS1B02G203300	C5	AT1G33240;AT1G76880;AT1G76890	AT-GTL1;AT1G76880;GT-2	Trihelix
TaDOF5.6	TraesCS6A02G240200	C5	AT1G33240;AT1G76880;AT1G76890	AT-GTL1;AT1G76880;GT-2	Trihelix
TaDOF5.6	TraesCS6B02G284400	C5	AT1G33240;AT1G76880;AT1G76890	AT-GTL1;AT1G76880;GT-2	Trihelix
TaDOF5.6	TraesCS4A02G054400	C5	AT5G07830;AT5G61250	AtGUS2;AtGUS1	NA
TaDOF5.6	TraesCS5D02G087700	C5	AT5G07830;AT5G61250	AtGUS2;AtGUS1	NA
TaDOF5.6	TraesCS7D02G142700	C5	AT5G34940	AtGUS3	NA
TaDOF5.6	TraesCS2B02G268100	C2	AT4G37750	ANT	AP2
TaDOF5.6	TraesCS2B02G313600	C6	AT2G36010;AT5G22220	E2F3;E2FB	E2F/DP
TaDOF5.6	TraesCS2B02G407600	C5	AT2G46680;AT3G61890	ATHB-7;ATHB-12	HD-ZIP
TaDOF5.6	TraesCS2A02G389400	C5	AT2G46680;AT3G61890	ATHB-7;ATHB-12	HD-ZIP
TaDOF5.6	TraesCS2D02G387300	C5	AT2G46680;AT3G61890	ATHB-7;ATHB-12	HD-ZIP
TaDOF5.6	TraesCS2D02G283900	C1	AT3G47350;AT3G47360;AT5G50590;AT5G50600;AT5G50690;AT5G50700;AT5G50770	ATHSD2;HSD3;HSD4;HSD1;HSD4;HSD1;HSD6	NA
TaDOF5.6	TraesCS5D02G565600	C1	AT3G47350;AT3G47360;AT5G50590;AT5G50600;AT5G50690;AT5G50700;AT5G50770	ATHSD2;HSD3;HSD4;HSD1;HSD4;HSD1;HSD6	NA
TaDOF5.6	TraesCS2B02G302100	C1	AT3G47350;AT3G47360;AT5G50590;AT5G50600;AT5G50690;AT5G50700;AT5G50770	ATHSD2;HSD3;HSD4;HSD1;HSD4;HSD1;HSD6	NA
TaDOF5.6	TraesCS7A02G560300	C5	AT5G20040	ATIPT9	NA
TaDOF5.6	TraesCS7D02G178000	C5	AT1G22500;AT1G35330;AT1G72200;AT2G34990;AT2G35000;AT3G05200;AT4G09110;AT4G09120;AT4G09130;AT4G40070;AT5G27420	ATL15;AT1G35330;ATL11;AT2G34990;ATL9;ATL6;ATL35;ATL36;ATL37;ATL32;ATL31	NA
TaDOF5.6	TraesCS3A02G131500	C1	AT2G42360	ATL41	NA
TaDOF5.6	TraesCS3B02G165100	C1	AT2G42360	ATL41	NA
TaDOF5.6	TraesCS1A02G201700	C5	AT2G17450;AT4G35480	ATL44;ATL45	NA
TaDOF5.6	TraesCS2B02G469500	C5	AT4G17905	ATL4H	NA
TaDOF5.6	TraesCS6B02G291300	C5	AT4G17905	ATL4H	NA
TaDOF5.6	TraesCS2A02G448700	C5	AT4G17905	ATL4H	NA
TaDOF5.6	TraesCS2D02G447900	C5	AT4G17905	ATL4H	NA
TaDOF5.6	TraesCS7B02G061100	C1	AT1G53820	ATL60	NA
TaDOF5.6	TraesCS6B02G288700	C1	AT1G20823;AT1G76410	ATL80;ATL8	NA
TaDOF5.6	TraesCS6D02G242100	C1	AT1G20823;AT1G76410	ATL80;ATL8	NA
TaDOF5.6	TraesCS4B02G296400	C1	AT2G23550;AT2G23560;AT2G23570;AT2G23580;AT2G23590;AT2G23600;AT2G23610;AT2G23620;AT4G37140;AT4G37150;AT5G10300	ATMES6;MES7;MES19;MES4;MES8;ACL;MES3;MES1;MES20;MES9;HNL	NA
TaDOF5.6	TraesCS4D02G295300	C1	AT2G23550;AT2G23560;AT2G23570;AT2G23580;AT2G23590;AT2G23600;AT2G23610;AT2G23620;AT4G37140;AT4G37150;AT5G10300	ATMES6;MES7;MES19;MES4;MES8;ACL;MES3;MES1;MES20;MES9;HNL	NA
TaDOF5.6	TraesCS5D02G391700	C5	AT5G09690;AT5G09720;AT5G64560	ATMGT7;MRS2-8;MRS2-2	NA
TaDOF5.6	TraesCS7A02G149200	C6	AT2G07680	ATMRP11	NA
TaDOF5.6	TraesCS3D02G413700	C1	AT2G47190;AT3G06490;AT5G49620	ATMYB2;MYB108;AtMYB78	MYB
TaDOF5.6	TraesCS3A02G418100	C1	AT2G47190;AT3G06490;AT5G49620	ATMYB2;MYB108;AtMYB78	MYB
TaDOF5.6	TraesCS1A02G076200	C1	AT2G47190;AT3G06490;AT5G49620	ATMYB2;MYB108;AtMYB78	MYB
TaDOF5.6	TraesCS2A02G359100	C5	AT4G39390	ATNST-KT1	NA
TaDOF5.6	TraesCS2B02G378500	C5	AT4G39390	ATNST-KT1	NA
TaDOF5.6	TraesCS2D02G358100	C5	AT4G39390	ATNST-KT1	NA
TaDOF5.6	TraesCS6A02G229300	C6	AT4G39390	ATNST-KT1	NA
TaDOF5.6	TraesCS6D02G205500	C6	AT4G39390	ATNST-KT1	NA
TaDOF5.6	TraesCS7A02G390400	C5	AT4G25434	ATNUDT10	NA
TaDOF5.6	TraesCS7B02G277200	C5	AT1G28960;AT2G33980;AT5G45940	ATNUDT15;atnudt22;NUDT11	NA
TaDOF5.6	TraesCS7D02G372100	C5	AT1G28960;AT2G33980;AT5G45940	ATNUDT15;atnudt22;NUDT11	NA
TaDOF5.6	TraesCS7B02G226000	C6	AT5G06160	ATO	NA
TaDOF5.6	TraesCS3D02G051000	C1	AT2G01180;AT3G02600	ATPAP1;LPP3	NA
TaDOF5.6	TraesCS5B02G313700	C1	AT3G61060	AtPP2-A13	NA
TaDOF5.6	TraesCS1A02G188700	C1	AT3G61060	AtPP2-A13	NA
TaDOF5.6	TraesCS1D02G187700	C1	AT3G61060	AtPP2-A13	NA
TaDOF5.6	TraesCS4D02G350000	C1	AT3G61060	AtPP2-A13	NA
TaDOF5.6	TraesCS2D02G291300	C5	AT3G52300	ATPQ	NA
TaDOF5.6	TraesCS5A02G358700	C1	AT2G24220	ATPUP5	NA
TaDOF5.6	TraesCS5B02G361100	C1	AT2G24220	ATPUP5	NA
TaDOF5.6	TraesCS5B02G363800	C5	AT4G30210	ATR2	NA
TaDOF5.6	TraesCS7A02G543400	C2	AT5G40820	ATRAD3	NA
TaDOF5.6	TraesCS2A02G208200	C2	AT2G45280	ATRAD51C	NA
TaDOF5.6	TraesCS2A02G229300	C1	AT1G28340	AtRLP4	NA
TaDOF5.6	TraesCS5A02G163900	C6	AT3G49750;AT5G65830	AtRLP44;ATRLP57	NA
TaDOF5.6	TraesCS5D02G168900	C6	AT3G49750;AT5G65830	AtRLP44;ATRLP57	NA
TaDOF5.6	TraesCS7B02G248100	C5	AT4G15417	ATRTL1	NA
TaDOF5.6	TraesCS1A02G144000	C1	AT1G08600	ATRX	NA
TaDOF5.6	TraesCS2B02G556900	C1	AT2G26740;AT2G26750	ATSEH;AT2G26750	NA
TaDOF5.6	TraesCS3A02G344400	C1	AT3G08760	ATSIK	NA
TaDOF5.6	TraesCS3D02G337900	C5	AT3G08760	ATSIK	NA
TaDOF5.6	TraesCS1A02G065700	C2	AT5G60410	ATSIZ1	NA
TaDOF5.6	TraesCS2A02G468800	C1	AT1G11720	ATSS3	NA
TaDOF5.6	TraesCS2B02G491700	C1	AT1G11720	ATSS3	NA
TaDOF5.6	TraesCS1A02G091500	C1	AT1G11720	ATSS3	NA
TaDOF5.6	TraesCS1B02G119300	C1	AT1G11720	ATSS3	NA
TaDOF5.6	TraesCS2B02G504000	C6	AT3G21820	ATXR2	NA
TaDOF5.6	TraesCS5D02G490100	C6	AT1G05180;AT2G32410	AXR1;AXL1	NA
TaDOF5.6	TraesCS7B02G217700	C2	AT1G05170;AT2G32430;AT4G26940	B3GALT2;B3GALT3;B3GALT4	NA
TaDOF5.6	TraesCS7A02G458600	C6	AT1G05170;AT2G32430;AT4G26940	B3GALT2;B3GALT3;B3GALT4	NA
TaDOF5.6	TraesCS5A02G235300	C1	AT1G22015;AT1G77810	B3GALT5;AT1G77810	NA
TaDOF5.6	TraesCS3D02G157800	C6	AT1G79900	BAC2	NA
TaDOF5.6	TraesCS5A02G312500	C1	AT5G07220;AT5G52060;AT5G62100	BAG3;BAG1;ATBAG2	NA
TaDOF5.6	TraesCS6A02G217600	C5	AT3G59660	BAGP1	NA
TaDOF5.6	TraesCS5A02G513200	C2	AT3G23920	BAM1	NA
TaDOF5.6	TraesCS3D02G479800	C5	AT2G01170	BAT1	NA
TaDOF5.6	TraesCS3B02G531700	C6	AT2G01170	BAT1	NA
TaDOF5.6	TraesCS2D02G100200	C5	AT3G03660;AT5G17810	WOX11;WOX12	WOX
TaDOF5.6	TraesCS2D02G295300	C6	AT2G36010;AT5G22220	E2F3;E2FB	E2F/DP
TaDOF5.6	TraesCS3A02G395500	C2	AT5G17430	BBM	AP2
TaDOF5.6	TraesCS3D02G223300	C1	AT1G23730;AT1G70410;AT3G01500;AT5G14740	BCA3;BCA4;BCA1;BCA2	NA
TaDOF5.6	TraesCS7D02G443400	C5	AT1G23730;AT1G70410;AT3G01500;AT5G14740	BCA3;BCA4;BCA1;BCA2	NA
TaDOF5.6	TraesCS7B02G354800	C5	AT1G23730;AT1G70410;AT3G01500;AT5G14740	BCA3;BCA4;BCA1;BCA2	NA
TaDOF5.6	TraesCS7A02G454300	C6	AT1G23730;AT1G70410;AT3G01500;AT5G14740	BCA3;BCA4;BCA1;BCA2	NA
TaDOF5.6	TraesCS7D02G368000	C1	AT4G18890	BEH3	BES1
TaDOF5.6	TraesCS3A02G139000	C1	AT4G18890	BEH3	BES1
TaDOF5.6	TraesCS7D02G008700	C1	AT1G12240;AT1G62660	BFRUCT4;BFRUCT3	NA
TaDOF5.6	TraesCS6D02G172400	C1	AT3G13750	BGAL1	NA
TaDOF5.6	TraesCS6B02G214100	C1	AT3G13750	BGAL1	NA
TaDOF5.6	TraesCS3B02G418300	C1	AT5G63810	BGAL10	NA
TaDOF5.6	TraesCS3D02G379200	C1	AT5G63810	BGAL10	NA
TaDOF5.6	TraesCS7A02G272400	C6	AT2G16730;AT4G35010;AT4G38590	BGAL13;BGAL11;BGAL14	NA
TaDOF5.6	TraesCS4B02G280900	C1	AT1G45130;AT4G36360	BGAL5;BGAL3	NA
TaDOF5.6	TraesCS4A02G022500	C1	AT1G45130;AT4G36360	BGAL5;BGAL3	NA
TaDOF5.6	TraesCS4D02G279400	C2	AT1G45130;AT4G36360	BGAL5;BGAL3	NA
TaDOF5.6	TraesCS4D02G220800	C5	AT2G28470	BGAL8	NA
TaDOF5.6	TraesCS3B02G430000	C6	AT5G36890	BGLU42	NA
TaDOF5.6	TraesCS4D02G038600	C1	AT3G18070;AT3G18080	BGLU43;BGLU44	NA
TaDOF5.6	TraesCS3A02G158600	C1	AT1G01260;AT2G46510	BHLH13;AIB	bHLH
TaDOF5.6	TraesCS3D02G166300	C1	AT1G01260;AT2G46510	BHLH13;AIB	bHLH
TaDOF5.6	TraesCS3B02G185400	C1	AT1G01260;AT2G46510	BHLH13;AIB	bHLH
TaDOF5.6	TraesCS3A02G252900	C1	AT1G01260;AT2G46510	BHLH13;AIB	bHLH
TaDOF5.6	TraesCS2B02G289900	C1	AT4G29930	BHLH27	bHLH
TaDOF5.6	TraesCS3B02G159100	C2	AT1G52150	ATHB-15	HD-ZIP
TaDOF5.6	TraesCS3B02G427300	C2	AT5G17430	BBM	AP2
TaDOF5.6	TraesCS7D02G529200	C1	AT5G10570;AT5G65640	BHLH61;BHLH93	bHLH
TaDOF5.6	TraesCS7B02G465400	C1	AT5G10570;AT5G65640	BHLH61;BHLH93	bHLH
TaDOF5.6	TraesCS7A02G543300	C5	AT5G10570;AT5G65640	BHLH61;BHLH93	bHLH
TaDOF5.6	TraesCS2D02G448000	C1	AT5G46690	BHLH71	bHLH
TaDOF5.6	TraesCS1A02G362800	C1	AT3G21330	BHLH87	bHLH
TaDOF5.6	TraesCS6A02G335500	C1	AT5G65320	BHLH99	bHLH
TaDOF5.6	TraesCS6B02G366200	C1	AT5G65320	BHLH99	bHLH
TaDOF5.6	TraesCS7A02G340300	C5	AT5G08130	BIM1	bHLH
TaDOF5.6	TraesCS1D02G259400	C5	AT5G48380	BIR1	NA
TaDOF5.6	TraesCS4A02G289400	C1	AT1G19700;AT1G75410;AT2G16400;AT4G34610	BLH10;BLH3;BLH7;BLH6	TALE
TaDOF5.6	TraesCS1A02G236100	C1	AT1G08860	BON3	NA
TaDOF5.6	TraesCS6A02G058200	C1	AT1G08860	BON3	NA
TaDOF5.6	TraesCS6B02G074300	C1	AT1G08860	BON3	NA
TaDOF5.6	TraesCS5D02G097600	C2	AT2G47160;AT3G62270	BOR1;BOR2	NA
TaDOF5.6	TraesCS1A02G117500	C1	AT1G15460;AT1G74810;AT4G32510;AT5G25430	BOR4;BOR5;AT4G32510;BOR6	NA
TaDOF5.6	TraesCS1B02G137300	C1	AT1G15460;AT1G74810;AT4G32510;AT5G25430	BOR4;BOR5;AT4G32510;BOR6	NA
TaDOF5.6	TraesCS3A02G126300	C5	AT1G15460;AT1G74810;AT4G32510;AT5G25430	BOR4;BOR5;AT4G32510;BOR6	NA
TaDOF5.6	TraesCS2B02G262200	C1	AT3G03740;AT3G43700;AT5G21010	BPM4;BPM6;BPM5	NA
TaDOF5.6	TraesCS5B02G174400	C2	AT1G55610;AT3G13380	BRL1;BRL3	NA
TaDOF5.6	TraesCS5A02G177300	C2	AT1G55610;AT3G13380	BRL1;BRL3	NA
TaDOF5.6	TraesCS1D02G161000	C1	AT1G15130	BRO1	NA
TaDOF5.6	TraesCS7B02G228900	C6	AT1G01740;AT4G00710	BSK4;BSK3	NA
TaDOF5.6	TraesCS3B02G448000	C5	AT3G48360;AT5G63160	BT2;BT1	NA
TaDOF5.6	TraesCS3B02G433400	C5	AT1G05690	BT3	NA
TaDOF5.6	TraesCS4A02G341600	C1	AT1G13460;AT3G26020;AT3G26030	B'THETA;AT3G26020;B'DELTA	NA
TaDOF5.6	TraesCS6B02G195800	C2	AT2G33560	BUBR1	NA
TaDOF5.6	TraesCS6B02G285900	C5	AT1G62710	bVPE	NA
TaDOF5.6	TraesCS5D02G447500	C1	AT3G54620;AT4G02640;AT5G28770	BZIP25;BZO2H1;BZIP63	bZIP
TaDOF5.6	TraesCS3A02G293700	C1	AT2G42380;AT3G58120	BZIP34;BZIP61	bZIP
TaDOF5.6	TraesCS3B02G328400	C1	AT2G42380;AT3G58120	BZIP34;BZIP61	bZIP
TaDOF5.6	TraesCS3A02G131900	C1	AT2G42380;AT3G58120	BZIP34;BZIP61	bZIP
TaDOF5.6	TraesCS5D02G148700	C6	AT2G42380;AT3G58120	BZIP34;BZIP61	bZIP
TaDOF5.6	TraesCS1A02G072600	C1	AT3G62420	BZIP53	bZIP
TaDOF5.6	TraesCS6D02G162800	C5	AT3G19450;AT4G34230	CAD4;CAD5	NA
TaDOF5.6	TraesCS2B02G603600	C1	AT3G44260;AT5G22250	CAF1-9;CAF1-11	NA
TaDOF5.6	TraesCS3D02G246000	C2	AT4G03550;AT4G04970	CALS12;CALS11	NA
TaDOF5.6	TraesCS2D02G600000	C5	AT1G06490;AT3G59100	CALS7;CALS6	NA
TaDOF5.6	TraesCSU02G021500	C5	AT1G06490;AT3G59100	CALS7;CALS6	NA
TaDOF5.6	TraesCS3B02G229700	C6	AT1G06490;AT3G59100	CALS7;CALS6	NA
TaDOF5.6	TraesCS2A02G163000	C1	AT2G22300;AT5G09410;AT5G64220	CAMTA3;EICBP.B;CAMTA2	CAMTA
TaDOF5.6	TraesCS2A02G283800	C1	AT1G67310	CAMTA4	CAMTA
TaDOF5.6	TraesCS3B02G113500	C1	AT2G40410;AT3G56170	CAN2;CAN1	NA
TaDOF5.6	TraesCS3D02G098400	C1	AT2G40410;AT3G56170	CAN2;CAN1	NA
TaDOF5.6	TraesCS5A02G046900	C1	AT2G02560	CAND1	NA
TaDOF5.6	TraesCS3B02G229800	C2	AT2G32590	CAPH	NA
TaDOF5.6	TraesCS6A02G311200	C2	AT2G32590	CAPH	NA
TaDOF5.6	TraesCS6D02G290500	C2	AT2G32590	CAPH	NA
TaDOF5.6	TraesCS6B02G341400	C2	AT2G32590	CAPH	NA
TaDOF5.6	TraesCS2D02G227700	C2	AT3G16730	CAPH2	NA
TaDOF5.6	TraesCS2B02G529400	C1	AT1G23140;AT1G48590;AT1G66360;AT1G70790;AT1G70800;AT1G70810;AT1G73580;AT2G01540;AT3G17980;AT5G37740	CAR8;CAR5;CAR2;CAR9;CAR6;CAR7;CAR3;CAR10;CAR4;AT5G37740	NA
TaDOF5.6	TraesCS5D02G161500	C6	AT3G27740	CARA	NA
TaDOF5.6	TraesCS6A02G110800	C1	AT2G07050	CAS1	NA
TaDOF5.6	TraesCS6B02G139000	C1	AT2G07050	CAS1	NA
TaDOF5.6	TraesCS2A02G444600	C5	AT2G38170;AT3G51860;AT5G01490	CAX1;CAX3;CAX4	NA
TaDOF5.6	TraesCS2D02G443700	C5	AT2G38170;AT3G51860;AT5G01490	CAX1;CAX3;CAX4	NA
TaDOF5.6	TraesCS3D02G206400	C5	AT2G38170;AT3G51860;AT5G01490	CAX1;CAX3;CAX4	NA
TaDOF5.6	TraesCS5B02G396800	C5	AT1G26340	CB5-A	NA
TaDOF5.6	TraesCS5A02G391900	C5	AT1G26340	CB5-A	NA
TaDOF5.6	TraesCS3B02G064500	C5	AT4G33000	CBL10	NA
TaDOF5.6	TraesCS1D02G261200	C1	AT1G64480	CBL8	NA
TaDOF5.6	TraesCS1B02G370900	C5	AT1G64480	CBL8	NA
TaDOF5.6	TraesCS3B02G370400	C1	AT5G17770	CBR1	NA
TaDOF5.6	TraesCS4B02G318700	C5	AT5G52790	CBSDUF5	NA
TaDOF5.6	TraesCS7D02G288400	C5	AT4G34120;AT4G36910	CBSX2;CBSX1	NA
TaDOF5.6	TraesCS1B02G187200	C1	AT4G27460;AT5G53750	CBSX5;AT5G53750	NA
TaDOF5.6	TraesCS1D02G167600	C5	AT4G27460;AT5G53750	CBSX5;AT5G53750	NA
TaDOF5.6	TraesCS5A02G001500	C1	AT3G63520	CCD1	NA
TaDOF5.6	TraesCS7D02G126000	C5	AT4G34050	CCoAOMT1	NA
TaDOF5.6	TraesCS6A02G147300	C1	AT1G15950;AT1G80820	CCR1;CCR2	NA
TaDOF5.6	TraesCS6D02G136600	C1	AT1G15950;AT1G80820	CCR1;CCR2	NA
TaDOF5.6	TraesCS5A02G163400	C5	AT1G15950;AT1G80820	CCR1;CCR2	NA
TaDOF5.6	TraesCS7D02G150500	C5	AT1G15950;AT1G80820	CCR1;CCR2	NA
TaDOF5.6	TraesCS3D02G378500	C1	AT3G20050	CCT1	NA
TaDOF5.6	TraesCS1D02G216600	C2	AT1G24510	CCT5	NA
TaDOF5.6	TraesCS7A02G358400	C2	AT1G24510	CCT5	NA
TaDOF5.6	TraesCS4B02G015200	C1	AT5G17850;AT5G17860	CCX2;CCX1	NA
TaDOF5.6	TraesCS3B02G400900	C6	AT1G07270;AT2G29680	CDC6B;CDC6	NA
TaDOF5.6	TraesCS1A02G360700	C2	AT1G02800;AT4G02290	CEL2;AtGH9B13	NA
TaDOF5.6	TraesCS5A02G280800	C1	AT4G13010	CEQORH	NA
TaDOF5.6	TraesCS7B02G229300	C5	AT4G29820	CFIS1	NA
TaDOF5.6	TraesCS3A02G271600	C2	AT2G31040	CGL160	NA
TaDOF5.6	TraesCS4B02G136100	C2	AT3G08530;AT3G11130	CHC2;CHC1	NA
TaDOF5.6	TraesCS2D02G600700	C5	AT3G15380	CHER1	NA
TaDOF5.6	TraesCS2B02G597400	C5	AT3G15380	CHER1	NA
TaDOF5.6	TraesCS6D02G286900	C1	AT1G74470	CHLP	NA
TaDOF5.6	TraesCS7D02G510000	C1	AT1G17730;AT1G73030	CHMP1A;CHMP1B	NA
TaDOF5.6	TraesCS7A02G520300	C1	AT1G17730;AT1G73030	CHMP1A;CHMP1B	NA
TaDOF5.6	TraesCS3B02G083400	C2	AT3G06400;AT5G18620	CHR11;CHR17	NA
TaDOF5.6	TraesCS5A02G031700	C1	AT3G17630	CHX19	NA
TaDOF5.6	TraesCS5B02G031800	C5	AT3G17630	CHX19	NA
TaDOF5.6	TraesCS3A02G305900	C2	AT4G18700;AT5G45810	CIPK12;CIPK19	NA
TaDOF5.6	TraesCS5A02G148000	C1	AT5G01810;AT5G07070;AT5G58380	CIPK15;CIPK2;CIPK10	NA
TaDOF5.6	TraesCS5B02G146500	C1	AT5G01810;AT5G07070;AT5G58380	CIPK15;CIPK2;CIPK10	NA
TaDOF5.6	TraesCS5D02G144800	C1	AT5G01810;AT5G07070;AT5G58380	CIPK15;CIPK2;CIPK10	NA
TaDOF5.6	TraesCS2D02G106800	C5	AT5G01810;AT5G07070;AT5G58380	CIPK15;CIPK2;CIPK10	NA
TaDOF5.6	TraesCS2A02G107000	C6	AT5G01810;AT5G07070;AT5G58380	CIPK15;CIPK2;CIPK10	NA
TaDOF5.6	TraesCS2B02G123900	C6	AT5G01810;AT5G07070;AT5G58380	CIPK15;CIPK2;CIPK10	NA
TaDOF5.6	TraesCS2B02G271700	C1	AT1G30270	CIPK23	NA
TaDOF5.6	TraesCS4A02G126800	C2	AT2G26980;AT5G21326	CIPK3;CIPK26	NA
TaDOF5.6	TraesCS4A02G187300	C5	AT2G26980;AT5G21326	CIPK3;CIPK26	NA
TaDOF5.6	TraesCS4D02G126200	C5	AT2G26980;AT5G21326	CIPK3;CIPK26	NA
TaDOF5.6	TraesCS5A02G377900	C1	AT3G23000	CIPK7	NA
TaDOF5.6	TraesCS5B02G381500	C1	AT3G23000	CIPK7	NA
TaDOF5.6	TraesCS5A02G492000	C1	AT1G01140	CIPK9	NA
TaDOF5.6	TraesCS4B02G074900	C1	AT3G06730	CITRX	NA
TaDOF5.6	TraesCS3B02G135000	C1	AT1G71697;AT1G74320;AT4G09760	CK1;AT1G74320;AT4G09760	NA
TaDOF5.6	TraesCS3D02G117800	C1	AT1G71697;AT1G74320;AT4G09760	CK1;AT1G74320;AT4G09760	NA
TaDOF5.6	TraesCS6B02G415700	C1	AT1G04440;AT4G28540;AT5G43320	CKL13;CKL6;CKL8	NA
TaDOF5.6	TraesCS6A02G378000	C1	AT1G04440;AT4G28540;AT5G43320	CKL13;CKL6;CKL8	NA
TaDOF5.6	TraesCS6D02G362500	C5	AT1G04440;AT4G28540;AT5G43320	CKL13;CKL6;CKL8	NA
TaDOF5.6	TraesCS6D02G206600	C1	AT2G20190	CLASP	NA
TaDOF5.6	TraesCS2B02G326900	C1	AT5G49890	CLC-C	NA
TaDOF5.6	TraesCS2D02G308100	C1	AT5G49890	CLC-C	NA
TaDOF5.6	TraesCS2A02G309900	C1	AT5G49890	CLC-C	NA
TaDOF5.6	TraesCS3A02G253600	C1	AT4G35440	CLC-E	NA
TaDOF5.6	TraesCS7D02G127100	C2	AT2G23380	CLF	NA
TaDOF5.6	TraesCS1B02G352400	C1	AT1G74310;AT4G14670;AT4G14675	CLPB1;CLPB2;AT4G14675	NA
TaDOF5.6	TraesCS3D02G273600	C1	AT1G74310;AT4G14670;AT4G14675	CLPB1;CLPB2;AT4G14675	NA
TaDOF5.6	TraesCS6A02G146400	C1	AT2G25140	CLPB4	NA
TaDOF5.6	TraesCS5B02G321800	C1	AT5G51070	CLPD	NA
TaDOF5.6	TraesCS5D02G328100	C1	AT5G51070	CLPD	NA
TaDOF5.6	TraesCS6B02G262000	C1	AT5G23140	CLPP2	NA
TaDOF5.6	TraesCS4B02G165100	C5	AT1G11750	CLPP6	NA
TaDOF5.6	TraesCS3B02G355600	C6	AT4G04870	CLS	NA
TaDOF5.6	TraesCS3D02G500600	C5	AT5G12170;AT5G19380	CLT3;CLT1	NA
TaDOF5.6	TraesCS6A02G147400	C6	AT5G10870	CM2	NA
TaDOF5.6	TraesCS3B02G334900	C5	AT1G69370;AT3G29200	CM3;CM1	NA
TaDOF5.6	TraesCS3A02G038300	C1	AT1G66400;AT5G37770	CML23;CML24	NA
TaDOF5.6	TraesCS3B02G045500	C1	AT1G66400;AT5G37770	CML23;CML24	NA
TaDOF5.6	TraesCS3B02G553500	C1	AT1G76640;AT3G01830;AT5G42380	CML39;CML40;CML37	NA
TaDOF5.6	TraesCS3A02G492500	C1	AT1G76640;AT3G01830;AT5G42380	CML39;CML40;CML37	NA
TaDOF5.6	TraesCS3A02G492600	C1	AT1G76640;AT3G01830;AT5G42380	CML39;CML40;CML37	NA
TaDOF5.6	TraesCS4D02G202600	C1	AT4G19020	CMT2	NA
TaDOF5.6	TraesCS3B02G280800	C2	AT1G14560	COAC1	NA
TaDOF5.6	TraesCS3A02G251300	C6	AT1G14560	COAC1	NA
TaDOF5.6	TraesCS6A02G187900	C5	AT4G26180	COAC2	NA
TaDOF5.6	TraesCS4B02G084800	C1	AT3G02210;AT3G29810;AT5G60920	COBL1;COBL3;COB	NA
TaDOF5.6	TraesCS4D02G082700	C1	AT3G02210;AT3G29810;AT5G60920	COBL1;COBL3;COB	NA
TaDOF5.6	TraesCS5A02G392000	C6	AT3G02210;AT3G29810;AT5G60920	COBL1;COBL3;COB	NA
TaDOF5.6	TraesCS6A02G286400	C1	AT3G07650;AT5G48250	COL9;COL10	CO-like
TaDOF5.6	TraesCS6B02G315400	C1	AT3G07650;AT5G48250	COL9;COL10	CO-like
TaDOF5.6	TraesCS6D02G267100	C1	AT3G07650;AT5G48250	COL9;COL10	CO-like
TaDOF5.6	TraesCS7A02G218600	C2	AT3G07650;AT5G48250	COL9;COL10	CO-like
TaDOF5.6	TraesCS2B02G313200	C5	AT2G26975;AT2G37925;AT3G46900;AT5G59030;AT5G59040	COPT6;COPT4;COPT2;COPT1;COPT3	NA
TaDOF5.6	TraesCS6A02G097000	C5	AT2G44520	COX10	NA
TaDOF5.6	TraesCS5A02G024500	C6	AT2G27450	CPA	NA
TaDOF5.6	TraesCS5B02G022300	C6	AT2G27450	CPA	NA
TaDOF5.6	TraesCS4A02G283400	C5	AT1G18890;AT1G74740	CPK10;CPK30	NA
TaDOF5.6	TraesCS2B02G227000	C1	AT2G41860;AT3G57530;AT5G12480;AT5G19450	CPK14;CPK32;CPK7;CPK8	NA
TaDOF5.6	TraesCS2A02G199700	C1	AT2G41860;AT3G57530;AT5G12480;AT5G19450	CPK14;CPK32;CPK7;CPK8	NA
TaDOF5.6	TraesCS2D02G207400	C2	AT2G41860;AT3G57530;AT5G12480;AT5G19450	CPK14;CPK32;CPK7;CPK8	NA
TaDOF5.6	TraesCS5B02G428400	C1	AT3G10660;AT5G04870	CPK2;CPK1	NA
TaDOF5.6	TraesCS7B02G165200	C1	AT2G31500	CPK24	NA
TaDOF5.6	TraesCS2D02G229100	C5	AT1G50700;AT1G61950;AT3G20410;AT4G04695;AT4G04700;AT4G04710;AT4G04720;AT4G04740;AT4G21940	CPK33;CPK19;CPK9;CPK31;CPK27;CPK22;CPK21;CPK23;CPK15	NA
TaDOF5.6	TraesCS6D02G218000	C6	AT4G21670	CPL1	NA
TaDOF5.6	TraesCS4D02G154200	C6	AT2G33540	CPL3	NA
TaDOF5.6	TraesCS4A02G143100	C6	AT2G33540	CPL3	NA
TaDOF5.6	TraesCS1A02G214600	C1	AT2G44650;AT3G60210	CPN10-2;CPN10-1	NA
TaDOF5.6	TraesCS6B02G039300	C5	AT1G55490;AT3G13470;AT5G56500	CPN60B1;CPN60B2;CPN60B3	NA
TaDOF5.6	TraesCS4D02G133700	C1	AT3G11210	CPRD49	NA
TaDOF5.6	TraesCS2D02G173100	C6	AT3G50530	CRK	NA
TaDOF5.6	TraesCS2B02G171600	C6	AT2G41140;AT3G56760	CRK1;CRK7	NA
TaDOF5.6	TraesCS2B02G240800	C6	AT4G21230	CRK27	NA
TaDOF5.6	TraesCS2B02G242200	C6	AT4G11521	CRK34	NA
TaDOF5.6	TraesCS6A02G139400	C1	AT1G16670	CRPK1	NA
TaDOF5.6	TraesCS4B02G205300	C2	AT5G48540	CRRSP55	NA
TaDOF5.6	TraesCS1A02G035600	C5	AT5G48540	CRRSP55	NA
TaDOF5.6	TraesCS2A02G545600	C1	AT1G09210;AT1G56340	CRT2;CRT1	NA
TaDOF5.6	TraesCS2D02G546500	C2	AT1G09210;AT1G56340	CRT2;CRT1	NA
TaDOF5.6	TraesCS2A02G340000	C6	AT4G08920	CRY1	NA
TaDOF5.6	TraesCS2D02G123300	C5	AT1G08830	CSD1	NA
TaDOF5.6	TraesCS4A02G065800	C6	AT5G18100	CSD3	NA
TaDOF5.6	TraesCS7D02G190000	C5	AT1G23480;AT1G24070;AT3G56000;AT4G13410;AT4G16590;AT5G16190	CSLA3;CSLA10;CSLA14;CSLA15;ATCSLA01;ATCSLA11	NA
TaDOF5.6	TraesCS5D02G415700	C1	AT4G07960	CSLC12	NA
TaDOF5.6	TraesCS1D02G334400	C1	AT4G07960	CSLC12	NA
TaDOF5.6	TraesCS5A02G187100	C2	AT4G09680	CTC1	NA
TaDOF5.6	TraesCS5D02G204000	C2	AT4G09680	CTC1	NA
TaDOF5.6	TraesCS3D02G073000	C1	AT3G55440	CTIMC	NA
TaDOF5.6	TraesCS3A02G073300	C1	AT3G55440	CTIMC	NA
TaDOF5.6	TraesCS5B02G272600	C6	AT1G05850	CTL1	NA
TaDOF5.6	TraesCS5D02G444200	C6	AT1G19190;AT1G47480;AT1G49640;AT1G49650;AT1G49660;AT2G03550;AT3G48690;AT3G48700	CXE1;CXE2;CXE3;CXE4;CXE5;CXE7;CXE12;CXE13	NA
TaDOF5.6	TraesCS2D02G479600	C1	AT1G11530	CXXS1	NA
TaDOF5.6	TraesCS2B02G505100	C1	AT1G11530	CXXS1	NA
TaDOF5.6	TraesCS2A02G480300	C1	AT1G11530	CXXS1	NA
TaDOF5.6	TraesCS3B02G183400	C2	AT1G44110;AT1G77390	CYCA1-1;CYCA1-2	NA
TaDOF5.6	TraesCS3A02G157000	C2	AT1G44110;AT1G77390	CYCA1-1;CYCA1-2	NA
TaDOF5.6	TraesCS4B02G253100	C1	AT1G47210;AT1G47220;AT1G47230;AT5G43080	CYCA3-2;CYCA3-3;CYCA3-4;CYCA3-1	NA
TaDOF5.6	TraesCS2B02G422800	C2	AT2G17620;AT4G35620	CYCB2-1;CYCB2-2	NA
TaDOF5.6	TraesCS7A02G549500	C2	AT2G17620;AT4G35620	CYCB2-1;CYCB2-2	NA
TaDOF5.6	TraesCS7D02G536000	C2	AT2G17620;AT4G35620	CYCB2-1;CYCB2-2	NA
TaDOF5.6	TraesCS4A02G046900	C1	AT4G37630	CYCD5-1	NA
TaDOF5.6	TraesCS5D02G080600	C2	AT4G37630	CYCD5-1	NA
TaDOF5.6	TraesCS5B02G158200	C5	AT1G44542;AT4G34180;AT4G35220	CYCLASE3;CYCLASE1;CYCLASE2	NA
TaDOF5.6	TraesCS2D02G411300	C1	AT2G45080;AT3G60550	CYCU2-1;CYCU2-2	NA
TaDOF5.6	TraesCS4A02G312600	C6	AT3G56070	CYP19-3	NA
TaDOF5.6	TraesCSU02G067400	C5	AT1G26940	CYP23	NA
TaDOF5.6	TraesCS7A02G175300	C5	AT2G15790	CYP40	NA
TaDOF5.6	TraesCS6A02G271300	C5	AT4G19230;AT5G45340	CYP707A1;CYP707A3	NA
TaDOF5.6	TraesCS2A02G152500	C1	AT2G46950;AT2G46960;AT4G27710	CYP709B2;CYP709B1;CYP709B3	NA
TaDOF5.6	TraesCS2B02G177500	C1	AT2G46950;AT2G46960;AT4G27710	CYP709B2;CYP709B1;CYP709B3	NA
TaDOF5.6	TraesCS4B02G312300	C5	AT2G26170	CYP711A1	NA
TaDOF5.6	TraesCS4D02G309900	C5	AT2G26170	CYP711A1	NA
TaDOF5.6	TraesCS3D02G061900	C5	AT1G11610;AT2G30750;AT2G30770;AT3G48270;AT3G48280;AT3G48290;AT3G48300;AT3G48310;AT3G48320;AT4G13290;AT4G13310;AT4G20235;AT4G20240;AT5G24950;AT5G24960;AT5G42590	CYP71A18;CYP71A12;CYP71A13;CYP71A26;CYP71A25;CYP71A24;CYP71A23;CYP71A22;CYP71A21;CYP71A19;CYP71A20;CYP71A28;CYP71A27;CYP71A15;CYP71A14;CYP71A16	NA
TaDOF5.6	TraesCS1D02G200600	C6	AT1G19630	CYP722A1	NA
TaDOF5.6	TraesCS3A02G227800	C5	AT1G17060	CYP72C1	NA
TaDOF5.6	TraesCS3A02G228200	C5	AT1G17060	CYP72C1	NA
TaDOF5.6	TraesCS5A02G403200	C1	AT5G42650	CYP74A	NA
TaDOF5.6	TraesCS5D02G413200	C1	AT5G42650	CYP74A	NA
TaDOF5.6	TraesCS7D02G444200	C1	AT1G11600	CYP77B1	NA
TaDOF5.6	TraesCS2D02G183000	C1	AT1G13710;AT1G74110	CYP78A5;CYP78A10	NA
TaDOF5.6	TraesCS2A02G175700	C5	AT1G13710;AT1G74110	CYP78A5;CYP78A10	NA
TaDOF5.6	TraesCS1A02G442100	C6	AT5G10600;AT5G10610	CYP81K2;CYP81K1	NA
TaDOF5.6	TraesCS3B02G061000	C1	AT4G36220;AT5G04330	CYP84A1;CYP84A4	NA
TaDOF5.6	TraesCS1B02G202400	C5	AT4G36220;AT5G04330	CYP84A1;CYP84A4	NA
TaDOF5.6	TraesCS1A02G177800	C5	AT4G36220;AT5G04330	CYP84A1;CYP84A4	NA
TaDOF5.6	TraesCS1D02G176400	C5	AT4G36220;AT5G04330	CYP84A1;CYP84A4	NA
TaDOF5.6	TraesCS2A02G013200	C2	AT3G30180;AT5G38970	CYP85A2;CYP85A1	NA
TaDOF5.6	TraesCS1A02G366500	C1	AT1G64900;AT1G64930;AT1G64940;AT1G64950;AT2G12190;AT3G03470;AT5G61320	CYP89A2;CYP89A7;CYP89A6;CYP89A5;AT2G12190;CYP89A9;CYP89A3	NA
TaDOF5.6	TraesCS1A02G177300	C1	AT1G64900;AT1G64930;AT1G64940;AT1G64950;AT2G12190;AT3G03470;AT5G61320	CYP89A2;CYP89A7;CYP89A6;CYP89A5;AT2G12190;CYP89A9;CYP89A3	NA
TaDOF5.6	TraesCS1D02G175700	C1	AT1G64900;AT1G64930;AT1G64940;AT1G64950;AT2G12190;AT3G03470;AT5G61320	CYP89A2;CYP89A7;CYP89A6;CYP89A5;AT2G12190;CYP89A9;CYP89A3	NA
TaDOF5.6	TraesCS3B02G121200	C1	AT3G13730	CYP90D1	NA
TaDOF5.6	TraesCS3A02G103800	C5	AT3G13730	CYP90D1	NA
TaDOF5.6	TraesCS1A02G351600	C1	AT3G01900;AT3G48520;AT5G63450	CYP94B2;CYP94B3;CYP94B1	NA
TaDOF5.6	TraesCS4A02G183600	C1	AT2G27690	CYP94C1	NA
TaDOF5.6	TraesCS1B02G286300	C1	AT2G27690	CYP94C1	NA
TaDOF5.6	TraesCS1D02G276600	C1	AT2G27690	CYP94C1	NA
TaDOF5.6	TraesCS2A02G577800	C5	AT1G34540;AT3G56630	CYP94D1;CYP94D2	NA
TaDOF5.6	TraesCS4B02G342000	C2	AT1G47620;AT1G57750;AT1G65340;AT1G66030;AT2G21910;AT2G23180;AT4G32170;AT4G39480;AT4G39490;AT4G39500;AT4G39510;AT5G02900;AT5G51900;AT5G52320	CYP96A8;CYP96A15;CYP96A3;CYP96A14P;CYP96A5;CYP96A1;CYP96A2;CYP96A9;CYP96A10;CYP96A11;CYP96A12;CYP96A13;AT5G51900;CYP96A4	NA
TaDOF5.6	TraesCS1A02G310500	C1	AT2G40890	CYP98A3	NA
TaDOF5.6	TraesCS1D02G310000	C1	AT2G40890	CYP98A3	NA
TaDOF5.6	TraesCS3B02G456800	C2	AT2G31980	CYS2	NA
TaDOF5.6	TraesCS2B02G293600	C5	AT2G31980	CYS2	NA
TaDOF5.6	TraesCS5D02G502600	C5	AT2G40880	CYS3	NA
TaDOF5.6	TraesCS4D02G025600	C1	AT4G16500;AT5G47550	CYS4;CYS5	NA
TaDOF5.6	TraesCS2D02G128900	C5	AT4G16500;AT5G47550	CYS4;CYS5	NA
TaDOF5.6	TraesCS5B02G300800	C5	AT3G61440	CYSC1	NA
TaDOF5.6	TraesCS1D02G072200	C1	AT2G40140;AT3G55980	CZF1;SZF1	C3H
TaDOF5.6	TraesCS3A02G537700	C1	AT2G40140;AT3G55980	CZF1;SZF1	NA
TaDOF5.6	TraesCS2A02G457900	C6	AT4G36400	D2HGDH	NA
TaDOF5.6	TraesCS4D02G056700	C6	AT4G31770	DBR1	NA
TaDOF5.6	TraesCS2A02G368200	C5	AT5G66750	DDM1	NA
TaDOF5.6	TraesCS2A02G339400	C5	AT5G39830	DEGP8	NA
TaDOF5.6	TraesCS7B02G096100	C6	AT5G40200	DEGP9	NA
TaDOF5.6	TraesCS3B02G231100	C5	AT4G10180	DET1	NA
TaDOF5.6	TraesCS7D02G363600	C1	AT2G19450	DGAT1	NA
TaDOF5.6	TraesCS7A02G358900	C5	AT2G19450	DGAT1	NA
TaDOF5.6	TraesCS7B02G268300	C5	AT2G19450	DGAT1	NA
TaDOF5.6	TraesCS7A02G225800	C1	AT3G51520	DGAT2	NA
TaDOF5.6	TraesCS7B02G193800	C1	AT3G51520	DGAT2	NA
TaDOF5.6	TraesCS5D02G120500	C6	AT5G63770	DGK2	NA
TaDOF5.6	TraesCS6B02G381300	C1	AT2G18730;AT4G30340;AT5G57690	DGK3;DGK7;DGK4	NA
TaDOF5.6	TraesCS6D02G330800	C1	AT2G18730;AT4G30340;AT5G57690	DGK3;DGK7;DGK4	NA
TaDOF5.6	TraesCS2B02G562300	C1	AT2G20900;AT4G28130	DGK5;DGK6	NA
TaDOF5.6	TraesCS7D02G279300	C1	AT3G23940	DHAD	NA
TaDOF5.6	TraesCS7B02G484200	C1	AT3G19820	DIM	NA
TaDOF5.6	TraesCS4B02G095600	C1	AT1G22900	DIR11	NA
TaDOF5.6	TraesCS4A02G217100	C1	AT1G22900	DIR11	NA
TaDOF5.6	TraesCS3D02G024100	C2	AT4G34060	DML3	NA
TaDOF5.6	TraesCS2B02G592600	C5	AT1G47655;AT3G50410;AT5G66940	DOF1.6;DOF3.4;DOF5.8	Dof
TaDOF5.6	TraesCS5B02G485300	C6	AT5G16780	DOT2	NA
TaDOF5.6	TraesCS3A02G118400	C2	AT5G22110	DPB2	NA
TaDOF5.6	TraesCS3D02G120300	C2	AT5G22110	DPB2	NA
TaDOF5.6	TraesCS5D02G318500	C1	AT1G12610;AT1G63030;AT4G25470;AT4G25480;AT4G25490;AT5G51990	DREB1F;DREB1E;DREB1C;DREB1A;DREB1B;DREB1D	ERF
TaDOF5.6	TraesCS5A02G310000	C1	AT1G12610;AT1G63030;AT4G25470;AT4G25480;AT4G25490;AT5G51990	DREB1F;DREB1E;DREB1C;DREB1A;DREB1B;DREB1D	ERF
TaDOF5.6	TraesCS4A02G433200	C1	AT1G12610;AT1G63030;AT4G25470;AT4G25480;AT4G25490;AT5G51990	DREB1F;DREB1E;DREB1C;DREB1A;DREB1B;DREB1D	ERF
TaDOF5.6	TraesCS6B02G218000	C1	AT1G12610;AT1G63030;AT4G25470;AT4G25480;AT4G25490;AT5G51990	DREB1F;DREB1E;DREB1C;DREB1A;DREB1B;DREB1D	ERF
TaDOF5.6	TraesCS7D02G052400	C1	AT1G12610;AT1G63030;AT4G25470;AT4G25480;AT4G25490;AT5G51990	DREB1F;DREB1E;DREB1C;DREB1A;DREB1B;DREB1D	ERF
TaDOF5.6	TraesCS1B02G235100	C1	AT3G11020;AT5G05410	DREB2B;DREB2A	ERF
TaDOF5.6	TraesCS1B02G256000	C2	AT1G75490;AT5G18450	DREB2D;DREB2G	ERF
TaDOF5.6	TraesCS5D02G388500	C1	AT1G06770;AT2G30580	DRIP1;DRIP2	NA
TaDOF5.6	TraesCS5B02G382100	C1	AT1G06770;AT2G30580	DRIP1;DRIP2	NA
TaDOF5.6	TraesCS2B02G298400	C6	AT2G14120;AT4G33650	DRP3B;DRP3A	NA
TaDOF5.6	TraesCS1A02G203000	C1	AT2G17190;AT2G17200	DSK2A;DSK2B	NA
TaDOF5.6	TraesCS1D02G206500	C2	AT2G17190;AT2G17200	DSK2A;DSK2B	NA
TaDOF5.6	TraesCS3B02G153900	C1	AT5G19760	DTC	NA
TaDOF5.6	TraesCS1A02G124600	C5	AT5G19760	DTC	NA
TaDOF5.6	TraesCS1D02G388600	C5	AT1G15150;AT1G15160;AT1G15170;AT1G15180;AT1G64820;AT1G66760;AT1G66780;AT1G71140;AT2G04040;AT2G04050;AT2G04066;AT2G04070;AT2G04080;AT2G04090;AT2G04100	DTX10;DTX11;DTX12;DTX13;DTX7;DTX9;DTX8;DTX14;DTX1;DTX3;AT2G04066;DTX4;DTX2;DTX5;DTX6	NA
TaDOF5.6	TraesCS3A02G229400	C5	AT1G15150;AT1G15160;AT1G15170;AT1G15180;AT1G64820;AT1G66760;AT1G66780;AT1G71140;AT2G04040;AT2G04050;AT2G04066;AT2G04070;AT2G04080;AT2G04090;AT2G04100	DTX10;DTX11;DTX12;DTX13;DTX7;DTX9;DTX8;DTX14;DTX1;DTX3;AT2G04066;DTX4;DTX2;DTX5;DTX6	NA
TaDOF5.6	TraesCS3B02G255200	C5	AT1G15150;AT1G15160;AT1G15170;AT1G15180;AT1G64820;AT1G66760;AT1G66780;AT1G71140;AT2G04040;AT2G04050;AT2G04066;AT2G04070;AT2G04080;AT2G04090;AT2G04100	DTX10;DTX11;DTX12;DTX13;DTX7;DTX9;DTX8;DTX14;DTX1;DTX3;AT2G04066;DTX4;DTX2;DTX5;DTX6	NA
TaDOF5.6	TraesCS7D02G230900	C5	AT1G73700;AT5G52450	DTX17;DTX16	NA
TaDOF5.6	TraesCS2A02G278500	C5	AT1G73700;AT5G52450	DTX17;DTX16	NA
TaDOF5.6	TraesCS2B02G296100	C5	AT1G73700;AT5G52450	DTX17;DTX16	NA
TaDOF5.6	TraesCS2D02G277600	C5	AT1G73700;AT5G52450	DTX17;DTX16	NA
TaDOF5.6	TraesCS4D02G302500	C5	AT5G10420;AT5G44050;AT5G65380	DTX26;DTX28;DTX27	NA
TaDOF5.6	TraesCS4B02G304300	C5	AT5G10420;AT5G44050;AT5G65380	DTX26;DTX28;DTX27	NA
TaDOF5.6	TraesCS2A02G222300	C1	AT1G11670;AT1G61890;AT4G21903;AT4G21910	DTX36;DTX37;AT4G21903;AT4G21910	NA
TaDOF5.6	TraesCS2D02G228200	C5	AT1G11670;AT1G61890;AT4G21903;AT4G21910	DTX36;DTX37;AT4G21903;AT4G21910	NA
TaDOF5.6	TraesCS3B02G563200	C5	AT1G11670;AT1G61890;AT4G21903;AT4G21910	DTX36;DTX37;AT4G21903;AT4G21910	NA
TaDOF5.6	TraesCS5D02G332300	C5	AT1G11670;AT1G61890;AT4G21903;AT4G21910	DTX36;DTX37;AT4G21903;AT4G21910	NA
TaDOF5.6	TraesCS5B02G326600	C5	AT1G11670;AT1G61890;AT4G21903;AT4G21910	DTX36;DTX37;AT4G21903;AT4G21910	NA
TaDOF5.6	TraesCS5B02G522900	C2	AT1G71870	DTX54	NA
TaDOF5.6	TraesCS1A02G255800	C2	AT3G21500;AT4G15560	DXPS1;DXS	NA
TaDOF5.6	TraesCS1D02G255100	C5	AT3G21500;AT4G15560	DXPS1;DXS	NA
TaDOF5.6	TraesCS3D02G141500	C2	AT1G52150	ATHB-15	HD-ZIP
TaDOF5.6	TraesCS3D02G389100	C2	AT5G17430	BBM	AP2
TaDOF5.6	TraesCS4A02G123800	C6	AT5G57390	AIL5	AP2
TaDOF5.6	TraesCS4A02G200700	C6	AT2G27230	LHW	bHLH
TaDOF5.6	TraesCS6D02G169200	C6	AT2G25490;AT5G25350	EBF1;EBF2	NA
TaDOF5.6	TraesCS6B02G210700	C6	AT2G25490;AT5G25350	EBF1;EBF2	NA
TaDOF5.6	TraesCS1A02G244700	C1	AT1G09010	EBM	NA
TaDOF5.6	TraesCS1A02G047000	C1	AT1G07670;AT1G07810	ECA4;ECA1	NA
TaDOF5.6	TraesCS1B02G060700	C1	AT1G07670;AT1G07810	ECA4;ECA1	NA
TaDOF5.6	TraesCS1D02G047900	C1	AT1G07670;AT1G07810	ECA4;ECA1	NA
TaDOF5.6	TraesCS5A02G341000	C6	AT1G76150	ECH2	NA
TaDOF5.6	TraesCS4A02G122800	C6	AT4G16210	ECHIA	NA
TaDOF5.6	TraesCS3A02G074900	C1	AT3G55360	ECR	NA
TaDOF5.6	TraesCS3D02G267900	C5	AT1G79270	ECT8	NA
TaDOF5.6	TraesCS3B02G232300	C6	AT1G27960	ECT9	NA
TaDOF5.6	TraesCS3D02G199400	C6	AT1G27960	ECT9	NA
TaDOF5.6	TraesCS1A02G178300	C5	AT2G18080;AT4G36190;AT4G36195	EDA2;AT4G36190;AT4G36195	NA
TaDOF5.6	TraesCS1B02G202100	C6	AT2G18080;AT4G36190;AT4G36195	EDA2;AT4G36190;AT4G36195	NA
TaDOF5.6	TraesCS7A02G060100	C6	AT3G56990	EDA7	NA
TaDOF5.6	TraesCS5B02G173700	C2	AT2G44190;AT3G60000	EDE1;QWRF6	NA
TaDOF5.6	TraesCS3A02G123700	C5	AT2G03500	EFM	G2-like
TaDOF5.6	TraesCS6D02G121200	C2	AT3G20290;AT4G05520	EHD1;EHD2	NA
TaDOF5.6	TraesCS6A02G131300	C2	AT3G20290;AT4G05520	EHD1;EHD2	NA
TaDOF5.6	TraesCS6B02G159700	C2	AT3G20290;AT4G05520	EHD1;EHD2	NA
TaDOF5.6	TraesCS4B02G381200	C1	AT5G03280	EIN2	NA
TaDOF5.6	TraesCS5D02G138500	C2	AT2G20340;AT4G28680	ELI5;TYRDC	NA
TaDOF5.6	TraesCS1B02G116100	C6	AT1G49540	ELP2	NA
TaDOF5.6	TraesCS4B02G198800	C6	AT4G10090	ELP6	NA
TaDOF5.6	TraesCS3D02G058800	C6	AT2G45330;AT5G23600	emb1067;AT5G23600	NA
TaDOF5.6	TraesCS6B02G249700	C1	AT5G17710	EMB1241	NA
TaDOF5.6	TraesCS6A02G231900	C1	AT5G17710	EMB1241	NA
TaDOF5.6	TraesCS7B02G111000	C2	AT5G37630	EMB2656	NA
TaDOF5.6	TraesCS1D02G148500	C6	AT3G02660	EMB2768	NA
TaDOF5.6	TraesCS3B02G229000	C6	AT3G06350	EMB3004	NA
TaDOF5.6	TraesCS3D02G036700	C5	AT1G68290	ENDO2	NA
TaDOF5.6	TraesCS2A02G350900	C2	AT3G54420	EP3	NA
TaDOF5.6	TraesCS2A02G350800	C5	AT3G54420	EP3	NA
TaDOF5.6	TraesCS4A02G028300	C1	AT3G22820;AT4G14723	EPFL5;EPFL4	NA
TaDOF5.6	TraesCS2B02G271900	C1	AT1G30360	ERD4	NA
TaDOF5.6	TraesCS2D02G272000	C6	AT1G79940;AT4G21180	ERDJ2A;ERDJ2B	NA
TaDOF5.6	TraesCS4D02G194500	C1	AT3G08970	ERDJ3A	NA
TaDOF5.6	TraesCS6B02G366900	C1	AT2G26330	ERECTA	NA
TaDOF5.6	TraesCS3A02G404400	C1	AT1G22810;AT1G71520	ERF019;ERF020	ERF
TaDOF5.6	TraesCS1A02G220000	C1	AT2G44940;AT3G60490	ERF034;ERF035	ERF
TaDOF5.6	TraesCS7A02G180900	C5	AT1G36060	ERF055	ERF
TaDOF5.6	TraesCS6D02G281200	C6	AT1G36060	ERF055	ERF
TaDOF5.6	TraesCS2A02G116900	C2	AT5G18560	ERF086	ERF
TaDOF5.6	TraesCS1D02G376500	C1	AT4G34410	ERF109	ERF
TaDOF5.6	TraesCS3B02G357600	C1	AT1G28360	ERF12	ERF
TaDOF5.6	TraesCS6A02G243300	C1	AT4G17500;AT5G47220	ERF1A;ERF2	ERF
TaDOF5.6	TraesCS2A02G417300	C1	AT4G17500;AT5G47220	ERF1A;ERF2	ERF
TaDOF5.6	TraesCS2D02G414600	C1	AT4G17500;AT5G47220	ERF1A;ERF2	ERF
TaDOF5.6	TraesCS7B02G199400	C6	AT1G30960	ERG	NA
TaDOF5.6	TraesCS4A02G274300	C1	AT2G40940	ERS1	NA
TaDOF5.6	TraesCS4D02G036400	C5	AT2G40940	ERS1	NA
TaDOF5.6	TraesCS1D02G105600	C6	AT2G40940	ERS1	NA
TaDOF5.6	TraesCS1B02G127000	C6	AT2G40940	ERS1	NA
TaDOF5.6	TraesCS6D02G266200	C5	AT1G04310;AT3G04580;AT3G23150	ERS2;EIN4;ETR2	NA
TaDOF5.6	TraesCS6A02G285800	C5	AT1G04310;AT3G04580;AT3G23150	ERS2;EIN4;ETR2	NA
TaDOF5.6	TraesCS6A02G399400	C6	AT1G04310;AT3G04580;AT3G23150	ERS2;EIN4;ETR2	NA
TaDOF5.6	TraesCS2B02G118800	C1	AT2G39050	EULS3	NA
TaDOF5.6	TraesCS2B02G118700	C5	AT2G39050	EULS3	NA
TaDOF5.6	TraesCS6D02G296100	C1	AT1G35140;AT4G08950	EXL1;EXO	NA
TaDOF5.6	TraesCS4A02G417000	C2	AT5G51550	EXL3	NA
TaDOF5.6	TraesCS1B02G217200	C1	AT3G45960;AT3G45970;AT4G38400	EXLA3;EXLA1;EXLA2	NA
TaDOF5.6	TraesCS3A02G319700	C2	AT1G29630	EXO1	NA
TaDOF5.6	TraesCS3B02G346600	C2	AT1G29630	EXO1	NA
TaDOF5.6	TraesCS2A02G393700	C1	AT3G03220	EXPA13	NA
TaDOF5.6	TraesCS2D02G391600	C5	AT3G03220	EXPA13	NA
TaDOF5.6	TraesCS7D02G393300	C6	AT4G38210	EXPA20	NA
TaDOF5.6	TraesCS5D02G494800	C5	AT2G28950;AT2G39700;AT3G55500	EXPA6;EXPA4;EXPA16	NA
TaDOF5.6	TraesCS5B02G494400	C5	AT2G28950;AT2G39700;AT3G55500	EXPA6;EXPA4;EXPA16	NA
TaDOF5.6	TraesCS6A02G235800	C2	AT2G20750;AT4G28250	EXPB1;EXPB3	NA
TaDOF5.6	TraesCS2B02G390000	C5	AT2G20750;AT4G28250	EXPB1;EXPB3	NA
TaDOF5.6	TraesCS2A02G373000	C5	AT2G20750;AT4G28250	EXPB1;EXPB3	NA
TaDOF5.6	TraesCS2D02G369200	C5	AT2G20750;AT4G28250	EXPB1;EXPB3	NA
TaDOF5.6	TraesCS6B02G264400	C6	AT2G20750;AT4G28250	EXPB1;EXPB3	NA
TaDOF5.6	TraesCS5A02G537300	C1	AT1G65680;AT1G65681;AT2G45110;AT3G60570	EXPB2;EXPB6;EXPB4;EXPB5	NA
TaDOF5.6	TraesCS5A02G073100	C6	AT1G65680;AT1G65681;AT2G45110;AT3G60570	EXPB2;EXPB6;EXPB4;EXPB5	NA
TaDOF5.6	TraesCS5D02G086000	C6	AT1G65680;AT1G65681;AT2G45110;AT3G60570	EXPB2;EXPB6;EXPB4;EXPB5	NA
TaDOF5.6	TraesCS5B02G079400	C6	AT1G65680;AT1G65681;AT2G45110;AT3G60570	EXPB2;EXPB6;EXPB4;EXPB5	NA
TaDOF5.6	TraesCS2D02G039700	C1	AT5G64440	FAAH	NA
TaDOF5.6	TraesCS1B02G240900	C6	AT2G36305	FACE2	NA
TaDOF5.6	TraesCS6D02G260200	C1	AT3G12120	FAD2	NA
TaDOF5.6	TraesCS6A02G280000	C5	AT3G12120	FAD2	NA
TaDOF5.6	TraesCS4A02G182700	C2	AT2G29980;AT3G11170;AT5G05580	FAD3;FAD7;FAD8	NA
TaDOF5.6	TraesCS4B02G135900	C2	AT2G29980;AT3G11170;AT5G05580	FAD3;FAD7;FAD8	NA
TaDOF5.6	TraesCS4D02G130700	C2	AT2G29980;AT3G11170;AT5G05580	FAD3;FAD7;FAD8	NA
TaDOF5.6	TraesCS5A02G154800	C5	AT2G29980;AT3G11170;AT5G05580	FAD3;FAD7;FAD8	NA
TaDOF5.6	TraesCS7D02G132100	C6	AT1G48360	FAN1	NA
TaDOF5.6	TraesCS1A02G153100	C1	AT1G03990;AT3G23410;AT4G28570	FAO1;FAO3;FAO4B	NA
TaDOF5.6	TraesCS4A02G304400	C5	AT3G44540;AT3G44550;AT3G44560;AT4G33790;AT5G22420;AT5G22500	FAR4;FAR5;FAR8;FAR3;FAR7;FAR1	NA
TaDOF5.6	TraesCS5D02G341200	C2	AT1G65470	FAS1	NA
TaDOF5.6	TraesCS5B02G335500	C2	AT1G65470	FAS1	NA
TaDOF5.6	TraesCS5A02G336500	C2	AT1G65470	FAS1	NA
TaDOF5.6	TraesCS5D02G291700	C1	AT3G25110;AT4G13050	FATA;FATA2	NA
TaDOF5.6	TraesCS7A02G089000	C1	AT1G08510	FATB	NA
TaDOF5.6	TraesCS2A02G331300	C6	AT3G57280	FAX1	NA
TaDOF5.6	TraesCS7D02G191200	C6	AT1G50740;AT3G20510	FAX5;FAX6	NA
TaDOF5.6	TraesCS3B02G025200	C5	AT2G01140	FBA3	NA
TaDOF5.6	TraesCS4B02G085300	C1	AT3G07550	FBL12	NA
TaDOF5.6	TraesCS5A02G177800	C6	AT5G26030	FC1	NA
TaDOF5.6	TraesCS5D02G182100	C6	AT5G26030	FC1	NA
TaDOF5.6	TraesCS1B02G150400	C1	AT2G30390	FC2	NA
TaDOF5.6	TraesCS7A02G232200	C1	AT5G14780	FDH1	NA
TaDOF5.6	TraesCS5A02G482400	C1	AT3G09350;AT3G53800;AT5G02150	Fes1A;Fes1B;Fes1C	NA
TaDOF5.6	TraesCS4D02G257700	C5	AT5G67470	FH6	NA
TaDOF5.6	TraesCS4A02G404000	C1	AT1G28200;AT2G22475;AT4G40100	FIP1;GEM;AT4G40100	NA
TaDOF5.6	TraesCS4D02G301900	C1	AT1G28200;AT2G22475;AT4G40100	FIP1;GEM;AT4G40100	NA
TaDOF5.6	TraesCS4A02G023200	C1	AT3G57090;AT5G12390	FIS1A;FIS1B	NA
TaDOF5.6	TraesCS1B02G129000	C6	AT1G07110;AT3G30200	FKFBP;AT3G30200	NA
TaDOF5.6	TraesCS3B02G391700	C5	AT3G46550	FLA4	NA
TaDOF5.6	TraesCS7A02G243400	C5	AT2G04780	FLA7	NA
TaDOF5.6	TraesCS2A02G398500	C5	AT2G45470;AT3G60900	FLA8;FLA10	NA
TaDOF5.6	TraesCS2D02G396000	C5	AT2G45470;AT3G60900	FLA8;FLA10	NA
TaDOF5.6	TraesCS1A02G396700	C1	AT1G03870;AT2G20520;AT5G44130	FLA9;FLA6;FLA13	NA
TaDOF5.6	TraesCS4D02G068400	C5	AT3G04610	FLK	NA
TaDOF5.6	TraesCS2A02G461800	C5	AT5G46330	FLS2	NA
TaDOF5.6	TraesCS5D02G179900	C1	AT3G14110	FLU	NA
TaDOF5.6	TraesCS4A02G249600	C6	AT5G66380	FOLT1	NA
TaDOF5.6	TraesCS1D02G165100	C6	AT3G55630;AT5G05980	FPGS3;FPGS1	NA
TaDOF5.6	TraesCS2D02G515700	C1	AT2G23360;AT3G19370	FPP7;AT3G19370	NA
TaDOF5.6	TraesCS2A02G514100	C1	AT2G23360;AT3G19370	FPP7;AT3G19370	NA
TaDOF5.6	TraesCS3D02G258500	C2	AT4G17190;AT5G47770	FPS2;FPS1	NA
TaDOF5.6	TraesCS1D02G279000	C5	AT5G01100	FRB1	NA
TaDOF5.6	TraesCS3A02G360800	C6	AT1G07510;AT2G29080	FTSH10;FTSH3	NA
TaDOF5.6	TraesCS3B02G393200	C6	AT1G07510;AT2G29080	FTSH10;FTSH3	NA
TaDOF5.6	TraesCS7A02G287900	C1	AT1G17220	FUG1	NA
TaDOF5.6	TraesCS2B02G214000	C1	AT1G67830;AT3G26430	FXG1;AT3G26430	NA
TaDOF5.6	TraesCS1A02G373300	C6	AT1G50370;AT3G19980	FYPP1;FYPP3	NA
TaDOF5.6	TraesCS3B02G595600	C2	AT5G13840	FZR3	NA
TaDOF5.6	TraesCS7A02G552700	C1	AT4G02780	GA1	NA
TaDOF5.6	TraesCS7D02G539200	C1	AT4G02780	GA1	NA
TaDOF5.6	TraesCS1D02G120800	C5	AT4G02780	GA1	NA
TaDOF5.6	TraesCS1A02G119900	C5	AT4G02780	GA1	NA
TaDOF5.6	TraesCS7A02G552600	C6	AT4G02780	GA1	NA
TaDOF5.6	TraesCS2D02G423300	C5	AT1G79460	GA2	NA
TaDOF5.6	TraesCS2B02G445700	C5	AT1G79460	GA2	NA
TaDOF5.6	TraesCS3D02G149600	C1	AT1G30040;AT1G78440;AT2G34555	GA2OX2;GA2OX1;GA2OX3	NA
TaDOF5.6	TraesCS4A02G075600	C2	AT2G02000;AT2G02010;AT3G17720;AT5G17330	GAD3;GAD4;AT3G17720;GAD1	NA
TaDOF5.6	TraesCS3D02G023900	C1	AT3G17760	GAD5	NA
TaDOF5.6	TraesCS3A02G022600	C5	AT3G17760	GAD5	NA
TaDOF5.6	TraesCS6B02G385900	C1	AT4G30440	GAE1	NA
TaDOF5.6	TraesCS6A02G353200	C1	AT4G30440	GAE1	NA
TaDOF5.6	TraesCS6B02G305500	C1	AT2G33570	GALS1	NA
TaDOF5.6	TraesCS7B02G296900	C1	AT2G33570	GALS1	NA
TaDOF5.6	TraesCS6A02G277500	C5	AT2G33570	GALS1	NA
TaDOF5.6	TraesCS3B02G403800	C5	AT1G08280	GALT29A	NA
TaDOF5.6	TraesCS6B02G215700	C5	AT3G48680;AT5G63510	GAMMACAL2;GAMMA CAL1	NA
TaDOF5.6	TraesCS4B02G323000	C1	AT1G42970	GAPB	NA
TaDOF5.6	TraesCS7B02G213300	C1	AT1G13440;AT3G04120	GAPC2;GAPC1	NA
TaDOF5.6	TraesCS7A02G313100	C1	AT1G13440;AT3G04120	GAPC2;GAPC1	NA
TaDOF5.6	TraesCS6B02G243700	C1	AT1G13440;AT3G04120	GAPC2;GAPC1	NA
TaDOF5.6	TraesCS6D02G196300	C5	AT1G13440;AT3G04120	GAPC2;GAPC1	NA
TaDOF5.6	TraesCS7D02G465500	C6	AT1G16300;AT1G79530	GAPCP2;GAPCP1	NA
TaDOF5.6	TraesCS7A02G478100	C6	AT1G16300;AT1G79530	GAPCP2;GAPCP1	NA
TaDOF5.6	TraesCS5A02G227000	C2	AT5G15230	GASA4	NA
TaDOF5.6	TraesCS3B02G059500	C1	AT1G15040;AT1G66860;AT5G38200	GAT1_2.1;AT1G66860;AT5G38200	NA
TaDOF5.6	TraesCS3D02G050200	C1	AT1G15040;AT1G66860;AT5G38200	GAT1_2.1;AT1G66860;AT5G38200	NA
TaDOF5.6	TraesCS2A02G561300	C6	AT4G17570	GATA26	GATA
TaDOF5.6	TraesCS2A02G391700	C6	AT4G17570	GATA26	GATA
TaDOF5.6	TraesCS6A02G374600	C1	AT3G54810	GATA8	GATA
TaDOF5.6	TraesCS6B02G412300	C1	AT3G54810	GATA8	GATA
TaDOF5.6	TraesCS4B02G160500	C5	AT1G18580;AT1G74088	GAUT11;AT1G74088	NA
TaDOF5.6	TraesCS4A02G054900	C6	AT3G01040;AT5G15470	GAUT13;GAUT14	NA
TaDOF5.6	TraesCS4B02G249700	C6	AT3G01040;AT5G15470	GAUT13;GAUT14	NA
TaDOF5.6	TraesCS3B02G318100	C1	AT3G58790	GAUT15	NA
TaDOF5.6	TraesCS7D02G188300	C5	AT3G02350	GAUT9	NA
TaDOF5.6	TraesCS1B02G282800	C1	AT1G03970;AT5G44080	GBF4;AT5G44080	bZIP
TaDOF5.6	TraesCS3A02G378700	C1	AT1G03970;AT5G44080	GBF4;AT5G44080	bZIP
TaDOF5.6	TraesCS2A02G492900	C6	AT3G07270	GCH1	NA
TaDOF5.6	TraesCS3A02G133300	C6	AT2G45270	GCP1	NA
TaDOF5.6	TraesCS5A02G076800	C6	AT2G45270	GCP1	NA
TaDOF5.6	TraesCS3B02G166200	C6	AT2G45270	GCP1	NA
TaDOF5.6	TraesCS3D02G149500	C6	AT2G45270	GCP1	NA
TaDOF5.6	TraesCS3A02G476000	C6	AT1G24320;AT1G67490	GCS2;GCS1	NA
TaDOF5.6	TraesCS7A02G138500	C6	AT5G19980	GFT1	NA
TaDOF5.6	TraesCS7D02G140300	C6	AT5G19980	GFT1	NA
TaDOF5.6	TraesCS3D02G074800	C6	AT2G39550	GGB	NA
TaDOF5.6	TraesCS2A02G342800	C5	AT1G69820;AT4G39640;AT4G39650	GGT3;GGT1;GGT2	NA
TaDOF5.6	TraesCS4A02G250600	C1	AT5G28640	GIF1	NA
TaDOF5.6	TraesCS5D02G112800	C6	AT2G41880;AT3G57550	GK-1;AGK2	NA
TaDOF5.6	TraesCS5B02G105400	C6	AT2G41880;AT3G57550	GK-1;AGK2	NA
TaDOF5.6	TraesCS5A02G100300	C6	AT2G41880;AT3G57550	GK-1;AGK2	NA
TaDOF5.6	TraesCS4A02G266900	C1	AT1G48470;AT3G17820	GLN1-5;GLN1-3	NA
TaDOF5.6	TraesCS3B02G299800	C5	AT5G53460	GLT1	NA
TaDOF5.6	TraesCS3A02G266300	C5	AT5G53460	GLT1	NA
TaDOF5.6	TraesCS3D02G266400	C5	AT5G53460	GLT1	NA
TaDOF5.6	TraesCS3A02G205100	C2	AT1G17650	GLYR2	NA
TaDOF5.6	TraesCS6B02G393900	C5	AT2G05320	GNT2	NA
TaDOF5.6	TraesCS2B02G109800	C1	AT1G09350;AT1G56600;AT1G60450;AT1G60470;AT2G47180;AT4G26250;AT5G23790;AT5G30500	GOLS3;GOLS2;GOLS7;GOLS4;GOLS1;GOLS6;GOLS5;GOLS10	NA
TaDOF5.6	TraesCS3A02G339700	C5	AT1G02390;AT4G01950	GPAT2;ATGPAT3	NA
TaDOF5.6	TraesCS3D02G361300	C5	AT2G38110	GPAT6	NA
TaDOF5.6	TraesCS3A02G478100	C1	AT2G41540;AT3G07690	GPDHC1;AT3G07690	NA
TaDOF5.6	TraesCS7A02G150500	C1	AT2G25080;AT4G31870	GPX1;GPX7	NA
TaDOF5.6	TraesCS4A02G268700	C5	AT3G02520;AT5G16050	GRF7;GRF5	NA
TaDOF5.6	TraesCS6A02G257600	C1	AT2G45480	GRF9	GRF
TaDOF5.6	TraesCS2D02G061700	C6	AT1G10270;AT5G28340;AT5G28380	GRP23;AT5G28340;AT5G28380	NA
TaDOF5.6	TraesCS7B02G185700	C5	AT4G28730	GRXC5	NA
TaDOF5.6	TraesCS7A02G293400	C5	AT4G28730	GRXC5	NA
TaDOF5.6	TraesCS2A02G230100	C5	AT4G20140;AT5G44700	GSO1;GSO2	NA
TaDOF5.6	TraesCS3A02G452900	C1	AT3G03190;AT5G17220	GSTF11;GSTF12	NA
TaDOF5.6	TraesCS1B02G097400	C1	AT3G03190;AT5G17220	GSTF11;GSTF12	NA
TaDOF5.6	TraesCS3D02G133200	C2	AT3G03190;AT5G17220	GSTF11;GSTF12	NA
TaDOF5.6	TraesCS3D02G299900	C5	AT3G03190;AT5G17220	GSTF11;GSTF12	NA
TaDOF5.6	TraesCS5A02G024100	C5	AT3G03190;AT5G17220	GSTF11;GSTF12	NA
TaDOF5.6	TraesCS3D02G299700	C6	AT3G03190;AT5G17220	GSTF11;GSTF12	NA
TaDOF5.6	TraesCS4B02G059300	C6	AT3G03190;AT5G17220	GSTF11;GSTF12	NA
TaDOF5.6	TraesCS3A02G309000	C6	AT3G03190;AT5G17220	GSTF11;GSTF12	NA
TaDOF5.6	TraesCS5B02G021800	C6	AT3G03190;AT5G17220	GSTF11;GSTF12	NA
TaDOF5.6	TraesCS3B02G334300	C6	AT3G03190;AT5G17220	GSTF11;GSTF12	NA
TaDOF5.6	TraesCS4B02G199700	C5	AT3G55040;AT5G02780;AT5G02790	GSTL2;GSTL1;GSTL3	NA
TaDOF5.6	TraesCS1D02G189600	C5	AT1G10360;AT1G10370	GSTU18;GSTU17	NA
TaDOF5.6	TraesCS2A02G577900	C5	AT1G17170;AT1G17180;AT1G17190;AT1G78320;AT1G78340;AT1G78360;AT1G78370;AT1G78380;AT3G43800	GSTU24;GSTU25;GSTU26;GSTU23;GSTU22;ATGSTU21;GSTU20;GSTU19;GSTU27	NA
TaDOF5.6	TraesCS3D02G483000	C5	AT2G29420;AT2G29440;AT2G29450;AT2G29460;AT2G29470;AT2G29480;AT2G29490;AT3G09270	GSTU7;GSTU6;GSTU5;GSTU4;GSTU3;GSTU2;GSTU1;GSTU8	NA
TaDOF5.6	TraesCS5A02G051800	C6	AT2G02380;AT2G02390	GSTZ2;ATGSTZ1	NA
TaDOF5.6	TraesCS1D02G072600	C2	AT2G38250;AT5G01380	GT-3B;GT-3A	Trihelix
TaDOF5.6	TraesCS6D02G266700	C1	AT2G22900;AT4G37690;AT4G38310	GT7;GT6;AT4G38310	NA
TaDOF5.6	TraesCSU02G194500	C5	AT2G22900;AT4G37690;AT4G38310	GT7;GT6;AT4G38310	NA
TaDOF5.6	TraesCS3D02G404100	C1	AT1G77130;AT3G18660	GUX3;GUX1	NA
TaDOF5.6	TraesCS7B02G133400	C1	AT1G10760	GWD1	NA
TaDOF5.6	TraesCS1A02G358600	C1	AT1G17550;AT1G72770	HAB2;HAB1	NA
TaDOF5.6	TraesCS1B02G375100	C1	AT1G17550;AT1G72770	HAB2;HAB1	NA
TaDOF5.6	TraesCS3A02G249000	C2	AT1G17550;AT1G72770	HAB2;HAB1	NA
TaDOF5.6	TraesCS3B02G277900	C5	AT1G17550;AT1G72770	HAB2;HAB1	NA
TaDOF5.6	TraesCS1D02G449700	C6	AT1G17550;AT1G72770	HAB2;HAB1	NA
TaDOF5.6	TraesCS6B02G212600	C1	AT4G38130	HDA19	NA
TaDOF5.6	TraesCS3D02G524700	C2	AT3G04720	HEL	NA
TaDOF5.6	TraesCS1A02G057200	C1	AT1G09940;AT1G58290;AT2G31250	HEMA2;HEMA1;HEMA3	NA
TaDOF5.6	TraesCS6B02G136500	C1	AT1G44318;AT1G69740	HEMB2;HEMB1	NA
TaDOF5.6	TraesCS1A02G045400	C5	AT3G55260	HEXO1	NA
TaDOF5.6	TraesCS1A02G259800	C1	AT1G65590	HEXO3	NA
TaDOF5.6	TraesCS7A02G339000	C2	AT1G02340;AT5G56960	HFR1;AT5G56960	NA
TaDOF5.6	TraesCS7D02G346300	C6	AT1G02340;AT5G56960	HFR1;AT5G56960	NA
TaDOF5.6	TraesCS5A02G068900	C1	AT1G49560;AT4G37180	HHO6;HHO5	G2-like
TaDOF5.6	TraesCS5A02G401600	C5	AT1G49560;AT4G37180	HHO6;HHO5	G2-like
TaDOF5.6	TraesCS5D02G411800	C6	AT1G49560;AT4G37180	HHO6;HHO5	G2-like
TaDOF5.6	TraesCS6A02G149300	C5	AT2G24150;AT4G30850	HHP3;HHP2	NA
TaDOF5.6	TraesCS6D02G138600	C5	AT2G24150;AT4G30850	HHP3;HHP2	NA
TaDOF5.6	TraesCS4A02G219400	C5	AT3G02960;AT5G50740;AT5G63530	HIPP08;AT5G50740;HIPP07	NA
TaDOF5.6	TraesCS4B02G097900	C5	AT3G02960;AT5G50740;AT5G63530	HIPP08;AT5G50740;HIPP07	NA
TaDOF5.6	TraesCS5A02G244000	C5	AT1G22990	HIPP22	NA
TaDOF5.6	TraesCS6B02G332000	C1	AT4G39700	HIPP23	NA
TaDOF5.6	TraesCS4B02G348900	C5	AT2G18196;AT4G10465	HIPP30;HIPP44	NA
TaDOF5.6	TraesCS4D02G343300	C6	AT2G18196;AT4G10465	HIPP30;HIPP44	NA
TaDOF5.6	TraesCS4A02G184700	C6	AT3G05220;AT3G06130;AT5G19090	HIPP34;HIPP32;HIPP33	NA
TaDOF5.6	TraesCS5B02G131600	C6	AT3G05220;AT3G06130;AT5G19090	HIPP34;HIPP32;HIPP33	NA
TaDOF5.6	TraesCS5D02G141600	C6	AT3G05220;AT3G06130;AT5G19090	HIPP34;HIPP32;HIPP33	NA
TaDOF5.6	TraesCS4A02G372600	C5	AT5G51570	HIR4	NA
TaDOF5.6	TraesCS2D02G459900	C5	AT3G22425;AT4G14910	HISN5A;HISN5B	NA
TaDOF5.6	TraesCS7A02G419500	C6	AT4G30120	HMA3	NA
TaDOF5.6	TraesCS7D02G247800	C1	AT1G76490;AT2G17370	HMG1;HMG2	NA
TaDOF5.6	TraesCS2D02G401100	C1	AT3G51880	HMGB1	NA
TaDOF5.6	TraesCS6B02G218500	C2	AT1G04880	HMGB15	NA
TaDOF5.6	TraesCS5A02G522100	C5	AT4G11820	HMGS	NA
TaDOF5.6	TraesCS6A02G238600	C1	AT1G12270;AT1G62740;AT4G12400	HOP1;HOP2;HOP3	NA
TaDOF5.6	TraesCS1A02G241300	C6	AT5G13500	HPAT3	NA
TaDOF5.6	TraesCS5B02G530500	C1	AT4G10020	HSD5	NA
TaDOF5.6	TraesCS5A02G383800	C1	AT2G26150	HSFA2	HSF
TaDOF5.6	TraesCS4A02G062800	C1	AT5G03720	HSFA3	HSF
TaDOF5.6	TraesCS4B02G239700	C1	AT5G03720	HSFA3	HSF
TaDOF5.6	TraesCS1B02G396000	C1	AT3G22830;AT3G51910;AT3G63350;AT5G43840	HSFA6B;HSFA7A;HSFA7B;HSFA6A	HSF
TaDOF5.6	TraesCS4B02G385800	C2	AT3G24520	HSFC1	HSF
TaDOF5.6	TraesCS3B02G568300	C2	AT3G24520	HSFC1	HSF
TaDOF5.6	TraesCS4D02G358900	C2	AT3G24520	HSFC1	HSF
TaDOF5.6	TraesCSU02G127300	C2	AT3G24520	HSFC1	HSF
TaDOF5.6	TraesCS5A02G550700	C5	AT3G24520	HSFC1	HSF
TaDOF5.6	TraesCS6D02G322300	C1	AT1G54050	HSP17.4B	NA
TaDOF5.6	TraesCS6B02G374100	C1	AT1G54050	HSP17.4B	NA
TaDOF5.6	TraesCS3D02G115000	C1	AT5G12020;AT5G12030	HSP17.6;HSP17.7	NA
TaDOF5.6	TraesCS3A02G033900	C1	AT1G53540;AT3G46230;AT5G59720	HSP17.6C;HSP17.4A;HSP18.1	NA
TaDOF5.6	TraesCS3B02G048600	C1	AT1G53540;AT3G46230;AT5G59720	HSP17.6C;HSP17.4A;HSP18.1	NA
TaDOF5.6	TraesCS4B02G211600	C1	AT1G53540;AT3G46230;AT5G59720	HSP17.6C;HSP17.4A;HSP18.1	NA
TaDOF5.6	TraesCS5B02G245700	C1	AT1G53540;AT3G46230;AT5G59720	HSP17.6C;HSP17.4A;HSP18.1	NA
TaDOF5.6	TraesCS4B02G212300	C1	AT1G53540;AT3G46230;AT5G59720	HSP17.6C;HSP17.4A;HSP18.1	NA
TaDOF5.6	TraesCS4D02G212400	C1	AT1G53540;AT3G46230;AT5G59720	HSP17.6C;HSP17.4A;HSP18.1	NA
TaDOF5.6	TraesCS3B02G049800	C1	AT1G53540;AT3G46230;AT5G59720	HSP17.6C;HSP17.4A;HSP18.1	NA
TaDOF5.6	TraesCS3D02G045500	C1	AT1G53540;AT3G46230;AT5G59720	HSP17.6C;HSP17.4A;HSP18.1	NA
TaDOF5.6	TraesCS1A02G319600	C5	AT5G54660	HSP21.7	NA
TaDOF5.6	TraesCS6D02G169100	C1	AT1G52560	HSP26.5	NA
TaDOF5.6	TraesCS1A02G145000	C5	AT2G33210;AT3G23990	HSP60-2;CPN60	NA
TaDOF5.6	TraesCS4D02G305900	C5	AT2G33210;AT3G23990	HSP60-2;CPN60	NA
TaDOF5.6	TraesCS1A02G133100	C1	AT4G24280;AT5G49910	HSP70-6;HSP70-7	NA
TaDOF5.6	TraesCS4B02G397600	C1	AT4G37910	HSP70-9	NA
TaDOF5.6	TraesCS1A02G295600	C1	AT4G37910	HSP70-9	NA
TaDOF5.6	TraesCS2B02G047400	C1	AT5G52640	HSP90-1	NA
TaDOF5.6	TraesCS2A02G033700	C1	AT5G52640	HSP90-1	NA
TaDOF5.6	TraesCS7A02G242200	C1	AT5G56000;AT5G56010;AT5G56030	HSP90-4;HSP90-3;HSP81-2	NA
TaDOF5.6	TraesCS7B02G408400	C1	AT1G51060;AT5G54640	HTA10;RAT5	NA
TaDOF5.6	TraesCS1A02G132400	C1	AT2G38810;AT3G54560;AT4G13570	HTA8;H2AV;HTA4	NA
TaDOF5.6	TraesCS1B02G154500	C2	AT2G38810;AT3G54560;AT4G13570	HTA8;H2AV;HTA4	NA
TaDOF5.6	TraesCS3B02G167700	C1	AT5G65350	HTR11	NA
TaDOF5.6	TraesCS6D02G285500	C1	AT1G69700;AT1G74520	HVA22C;HVA22A	NA
TaDOF5.6	TraesCS5A02G063100	C6	AT4G24960;AT5G50720	HVA22D;HVA22E	NA
TaDOF5.6	TraesCS5D02G074300	C6	AT4G24960;AT5G50720	HVA22D;HVA22E	NA
[truncated: 9,767 more rows]

## Sheet: Table S26
Table S26. Callus induction efficiency and transformation efficiency of various varieties using vectors containing GUS, TaDOF5.6 and TaDOF3.4.
Group	Variety	Replication	Immature embryos	Embryonic callus	Callus Induction Efficiency	Shoot regenerated	Transformation Efficiency
GUS	Fielder	1	21	11	0.52381	5	0.238095
GUS	Fielder	2	18	9	0.5	5	0.277778
GUS	Fielder	3	24	13	0.541667	6	0.25
GUS	Fielder	4	19	10	0.526316	5	0.263158
GUS	Fielder	5	32	17	0.53125	8	0.25
TaDOF3.4	Fielder	1	26	22	0.846154	14	0.538462
TaDOF3.4	Fielder	2	29	24	0.827586	16	0.551724
TaDOF3.4	Fielder	3	25	21	0.84	13	0.52
TaDOF3.4	Fielder	4	30	26	0.866667	17	0.566667
TaDOF3.4	Fielder	5	29	25	0.862069	16	0.551724
TaDOF3.4	Fielder	6	21	18	0.857143	12	0.571429
TaDOF5.6	Fielder	1	45	40	0.888889	22	0.488889
TaDOF5.6	Fielder	2	47	43	0.914894	23	0.489362
TaDOF5.6	Fielder	3	44	38	0.863636	22	0.5
TaDOF5.6	Fielder	4	46	40	0.869565	23	0.5
GUS	KN199	1	43	10	0.232558	0	0
GUS	KN199	2	46	10	0.217391	0	0
GUS	KN199	3	47	11	0.234043	1	0.0212766
GUS	KN199	4	45	10	0.222222	0	0
TaDOF3.4	KN199	1	32	12	0.375	5	0.15625
TaDOF3.4	KN199	2	31	12	0.387097	5	0.16129
TaDOF3.4	KN199	3	34	13	0.382353	6	0.176471
TaDOF3.4	KN199	4	35	14	0.4	6	0.171429
TaDOF5.6	KN199	1	26	15	0.576923	9	0.346154
TaDOF5.6	KN199	2	24	14	0.583333	8	0.333333
TaDOF5.6	KN199	3	28	15	0.535714	10	0.357143
TaDOF5.6	KN199	4	27	14	0.518519	9	0.333333
GUS	JM22	1	33	7	0.212121	0	0
GUS	JM22	2	30	6	0.2	0	0
TaDOF3.4	JM22	1	34	13	0.382353	7	0.205882
TaDOF3.4	JM22	2	26	10	0.384615	6	0.230769
TaDOF5.6	JM22	1	37	21	0.567568	11	0.297297
TaDOF5.6	JM22	2	40	23	0.575	11	0.275
TaDOF5.6	JM22	3	38	21	0.552632	11	0.289474

## Sheet: Table S27
Table S27. Three genes associated with differentiated callus rate in 12 varieties.
SNP.ID	ref	alt	ref.num	alt.num	ref.mean	alt.mean	t.test.p	GeneID	ATAC.PeakID	Family	Cluster	tairID	tairName	fun	MP066.genotype	MP100.genotype	MP107.genotype	MP109.genotype	MP110.genotype	MP116.genotype	MP118.genotype	MP119.genotype	MP124.genotype	MP126.genotype	MP127.genotype	MP128.genotype	MP066.differentiated.callus.rate	MP100.differentiated.callus.rate	MP107.differentiated.callus.rate	MP109.differentiated.callus.rate	MP110.differentiated.callus.rate	MP116.differentiated.callus.rate	MP118.differentiated.callus.rate	MP119.differentiated.callus.rate	MP124.differentiated.callus.rate	MP126.differentiated.callus.rate	MP127.differentiated.callus.rate	MP128.differentiated.callus.rate
3B:586694169	CC	GG	6	6	5.445	28.32	0.0172041	TraesCS3B02G373800	3B:586693786-586694594	WOX	cluster5	NA	NA	NA	GG	CC	GG	CC	GG	GG	GG	CC	GG	CC	CC	CC	15.99	1.12	21.88	8.37	26.87	18.09	60.54	14.94	26.55	2.27	1.64	4.33
3B:586697904	AA	GG	6	6	5.445	28.32	0.0172041	TraesCS3B02G373800	NA	WOX	cluster5	NA	NA	NA	GG	AA	GG	AA	GG	GG	GG	AA	GG	AA	AA	AA	15.99	1.12	21.88	8.37	26.87	18.09	60.54	14.94	26.55	2.27	1.64	4.33
3B:586698326	CC	TT	6	6	5.445	28.32	0.0172041	TraesCS3B02G373800	NA	WOX	cluster5	NA	NA	NA	TT	CC	TT	CC	TT	TT	TT	CC	TT	CC	CC	CC	15.99	1.12	21.88	8.37	26.87	18.09	60.54	14.94	26.55	2.27	1.64	4.33
5B:682224909	GG	CC	8	4	22.4913	5.665	0.0379557	TraesCS5B02G519700	NA	C2H2	cluster5	NA	NA	NA	GG	CC	GG	GG	GG	GG	GG	CC	GG	CC	GG	CC	15.99	1.12	21.88	8.37	26.87	18.09	60.54	14.94	26.55	2.27	1.64	4.33
5B:682224914	CC	TT	8	4	22.4913	5.665	0.0379557	TraesCS5B02G519700	NA	C2H2	cluster5	NA	NA	NA	CC	TT	CC	CC	CC	CC	CC	TT	CC	TT	CC	TT	15.99	1.12	21.88	8.37	26.87	18.09	60.54	14.94	26.55	2.27	1.64	4.33
5B:682224923	AA	CC	8	4	22.4913	5.665	0.0379557	TraesCS5B02G519700	NA	C2H2	cluster5	NA	NA	NA	AA	CC	AA	AA	AA	AA	AA	CC	AA	CC	AA	CC	15.99	1.12	21.88	8.37	26.87	18.09	60.54	14.94	26.55	2.27	1.64	4.33
5B:682224933	GG	AA	8	4	22.4913	5.665	0.0379557	TraesCS5B02G519700	NA	C2H2	cluster5	NA	NA	NA	GG	AA	GG	GG	GG	GG	GG	AA	GG	AA	GG	AA	15.99	1.12	21.88	8.37	26.87	18.09	60.54	14.94	26.55	2.27	1.64	4.33
5B:682224942	AA	GG	8	4	22.4913	5.665	0.0379557	TraesCS5B02G519700	NA	C2H2	cluster5	NA	NA	NA	AA	GG	AA	AA	AA	AA	AA	GG	AA	GG	AA	GG	15.99	1.12	21.88	8.37	26.87	18.09	60.54	14.94	26.55	2.27	1.64	4.33
5B:682224946	GG	TT	8	4	22.4913	5.665	0.0379557	TraesCS5B02G519700	NA	C2H2	cluster5	NA	NA	NA	GG	TT	GG	GG	GG	GG	GG	TT	GG	TT	GG	TT	15.99	1.12	21.88	8.37	26.87	18.09	60.54	14.94	26.55	2.27	1.64	4.33
5B:682224949	TT	CC	8	4	22.4913	5.665	0.0379557	TraesCS5B02G519700	NA	C2H2	cluster5	NA	NA	NA	TT	CC	TT	TT	TT	TT	TT	CC	TT	CC	TT	CC	15.99	1.12	21.88	8.37	26.87	18.09	60.54	14.94	26.55	2.27	1.64	4.33
5B:682224952	GG	TT	8	4	22.4913	5.665	0.0379557	TraesCS5B02G519700	NA	C2H2	cluster5	NA	NA	NA	GG	TT	GG	GG	GG	GG	GG	TT	GG	TT	GG	TT	15.99	1.12	21.88	8.37	26.87	18.09	60.54	14.94	26.55	2.27	1.64	4.33
5B:682224953	TT	CC	8	4	22.4913	5.665	0.0379557	TraesCS5B02G519700	NA	C2H2	cluster5	NA	NA	NA	TT	CC	TT	TT	TT	TT	TT	CC	TT	CC	TT	CC	15.99	1.12	21.88	8.37	26.87	18.09	60.54	14.94	26.55	2.27	1.64	4.33
5B:682224976	AA	GG	8	4	22.4913	5.665	0.0379557	TraesCS5B02G519700	NA	C2H2	cluster5	NA	NA	NA	AA	GG	AA	AA	AA	AA	AA	GG	AA	GG	AA	GG	15.99	1.12	21.88	8.37	26.87	18.09	60.54	14.94	26.55	2.27	1.64	4.33
5B:682224991	GG	AA	8	4	22.4913	5.665	0.0379557	TraesCS5B02G519700	NA	C2H2	cluster5	NA	NA	NA	GG	AA	GG	GG	GG	GG	GG	AA	GG	AA	GG	AA	15.99	1.12	21.88	8.37	26.87	18.09	60.54	14.94	26.55	2.27	1.64	4.33
5B:682224993	CC	GG	8	4	22.4913	5.665	0.0379557	TraesCS5B02G519700	NA	C2H2	cluster5	NA	NA	NA	CC	GG	CC	CC	CC	CC	CC	GG	CC	GG	CC	GG	15.99	1.12	21.88	8.37	26.87	18.09	60.54	14.94	26.55	2.27	1.64	4.33
5B:682225008	GG	AA	8	4	22.4913	5.665	0.0379557	TraesCS5B02G519700	NA	C2H2	cluster5	NA	NA	NA	GG	AA	GG	GG	GG	GG	GG	AA	GG	AA	GG	AA	15.99	1.12	21.88	8.37	26.87	18.09	60.54	14.94	26.55	2.27	1.64	4.33
5B:682225134	GG	CC	8	4	22.4913	5.665	0.0379557	TraesCS5B02G519700	NA	C2H2	cluster5	NA	NA	NA	GG	CC	GG	GG	GG	GG	GG	CC	GG	CC	GG	CC	15.99	1.12	21.88	8.37	26.87	18.09	60.54	14.94	26.55	2.27	1.64	4.33
5B:682225173	GG	CC	8	4	22.4913	5.665	0.0379557	TraesCS5B02G519700	NA	C2H2	cluster5	NA	NA	NA	GG	CC	GG	GG	GG	GG	GG	CC	GG	CC	GG	CC	15.99	1.12	21.88	8.37	26.87	18.09	60.54	14.94	26.55	2.27	1.64	4.33
5B:682225283	GG	TT	8	4	22.4913	5.665	0.0379557	TraesCS5B02G519700	NA	C2H2	cluster5	NA	NA	NA	GG	TT	GG	GG	GG	GG	GG	TT	GG	TT	GG	TT	15.99	1.12	21.88	8.37	26.87	18.09	60.54	14.94	26.55	2.27	1.64	4.33
5B:682225320	TT	CC	8	4	22.4913	5.665	0.0379557	TraesCS5B02G519700	NA	C2H2	cluster5	NA	NA	NA	TT	CC	TT	TT	TT	TT	TT	CC	TT	CC	TT	CC	15.99	1.12	21.88	8.37	26.87	18.09	60.54	14.94	26.55	2.27	1.64	4.33
5B:682225356	AA	CC	8	4	22.4913	5.665	0.0379557	TraesCS5B02G519700	NA	C2H2	cluster5	NA	NA	NA	AA	CC	AA	AA	AA	AA	AA	CC	AA	CC	AA	CC	15.99	1.12	21.88	8.37	26.87	18.09	60.54	14.94	26.55	2.27	1.64	4.33
5B:682225524	AA	CC	8	4	22.4913	5.665	0.0379557	TraesCS5B02G519700	NA	C2H2	cluster5	NA	NA	NA	AA	CC	AA	AA	AA	AA	AA	CC	AA	CC	AA	CC	15.99	1.12	21.88	8.37	26.87	18.09	60.54	14.94	26.55	2.27	1.64	4.33
5B:682225753	TT	GG	8	4	22.4913	5.665	0.0379557	TraesCS5B02G519700	NA	C2H2	cluster5	NA	NA	NA	TT	GG	TT	TT	TT	TT	TT	GG	TT	GG	TT	GG	15.99	1.12	21.88	8.37	26.87	18.09	60.54	14.94	26.55	2.27	1.64	4.33
5B:682226126	TT	CC	8	4	22.4913	5.665	0.0379557	TraesCS5B02G519700	5B:682225995-682226376	C2H2	cluster5	NA	NA	NA	TT	CC	TT	TT	TT	TT	TT	CC	TT	CC	TT	CC	15.99	1.12	21.88	8.37	26.87	18.09	60.54	14.94	26.55	2.27	1.64	4.33
5B:682226168	CC	GG	8	4	22.4913	5.665	0.0379557	TraesCS5B02G519700	5B:682225995-682226376	C2H2	cluster5	NA	NA	NA	CC	GG	CC	CC	CC	CC	CC	GG	CC	GG	CC	GG	15.99	1.12	21.88	8.37	26.87	18.09	60.54	14.94	26.55	2.27	1.64	4.33
5B:682226186	AA	GG	8	4	22.4913	5.665	0.0379557	TraesCS5B02G519700	5B:682225995-682226376	C2H2	cluster5	NA	NA	NA	AA	GG	AA	AA	AA	AA	AA	GG	AA	GG	AA	GG	15.99	1.12	21.88	8.37	26.87	18.09	60.54	14.94	26.55	2.27	1.64	4.33
5B:682228479	AA	GG	8	4	22.4913	5.665	0.0379557	TraesCS5B02G519700	5B:682228364-682228776	C2H2	cluster5	NA	NA	NA	AA	GG	AA	AA	AA	AA	AA	GG	AA	GG	AA	GG	15.99	1.12	21.88	8.37	26.87	18.09	60.54	14.94	26.55	2.27	1.64	4.33
5B:682228480	CC	AA	8	4	22.4913	5.665	0.0379557	TraesCS5B02G519700	5B:682228364-682228776	C2H2	cluster5	NA	NA	NA	CC	AA	CC	CC	CC	CC	CC	AA	CC	AA	CC	AA	15.99	1.12	21.88	8.37	26.87	18.09	60.54	14.94	26.55	2.27	1.64	4.33
7A:3861700	AA	GG	7	4	22.73	4.1525	0.0372922	TraesCS7A02G008800	NA	NAC	cluster5	AT1G12260;AT1G62700;AT5G62380	NAC007;NAC026;NAC101	Encodes a NAC-domain transcription factor that is expressed in developing xylem. Over expression of this protein causes ectopic secondary cell wall growth. Complements some of the cell wall defects seen in SND1/NST1 double mutants.;Encodes a NAC-domain transcription factor. Expressed in the vascular tissue.;Encodes a NAC-domain transcription factor involved in xylem formation. Induces transdiffer…	AA	AA	AA	GG	GA	AA	AA	AA	AA	GG	GG	GG	15.99	1.12	21.88	8.37	26.87	18.09	60.54	14.94	26.55	2.27	1.64	4.33
7A:3862750	TT	CC	7	4	22.73	4.1525	0.0372922	TraesCS7A02G008800	7A:3862596-3862871	NAC	cluster5	AT1G12260;AT1G62700;AT5G62380	NAC007;NAC026;NAC101	Encodes a NAC-domain transcription factor that is expressed in developing xylem. Over expression of this protein causes ectopic secondary cell wall growth. Complements some of the cell wall defects seen in SND1/NST1 double mutants.;Encodes a NAC-domain transcription factor. Expressed in the vascular tissue.;Encodes a NAC-domain transcription factor involved in xylem formation. Induces transdiffer…	TT	TT	TT	CC	CT	TT	TT	TT	TT	CC	CC	CC	15.99	1.12	21.88	8.37	26.87	18.09	60.54	14.94	26.55	2.27	1.64	4.33

## Sheet: Table S28
Table S28. Primers used in in situ hybridization, Quantitively RT-PCR, and Luciferase reporter assay.
Primer	Sequence	Purpose
TaDOF5.6-TF	GAATTGTAATACGACTCACTATAGGGGATGATGGCAGGCGCAGCT	in situ hybridization
T-TaDOF5.6-R	GGAGAAGGACAGGTGGAGT	in situ hybridization
T-TaDOF5.6-F	ATGATGGCAGGCGCAGCT	in situ hybridization
TaDOF5.6-TR	GAATTGTAATACGACTCACTATAGGGAAACCACTAACGCATGCATG	in situ hybridization
TaDOF3.4-TF	GAATTGTAATACGACTCACTATAGGGATGGCTCCAGCCTCCGC	in situ hybridization
T-TaDOF3.4-R	CGCCGAAGTCCTCCCAT	in situ hybridization
T-TaDOF3.4-F	ATGGCTCCAGCCTCCGC	in situ hybridization
TaDOF3.4-TR	GAATTGTAATACGACTCACTATAGGGCGCCGAAGTCCTCCCAT	in situ hybridization
qTaLBD4-F	CAGCAACATCAGCAAGCTCC	Quantitively RT-PCR
qTaLBD4-R	CGCTGCAGCGACGTGATG	Quantitively RT-PCR
qTaSCL27-F	GGCTAGATGAGAGGAATGCC	Quantitively RT-PCR
qTaSCL27-R	TGTGGCGGCGGTCGAGCA	Quantitively RT-PCR
TaDOF3.4-2B-eGFP-Xbal-F	CTCGATACACCAAATCGACTCTAGAATGGCTCCAGCCTCCGC	Luciferase reporter assay
TaDOF3.4-2B-eGFP-KpnI-R	CTCGCCCTTGCTCACCATGGTACCTCCTCCTCCTCCGTTGCCGGCCTCCGGGG	Luciferase reporter assay
pTaLBD4-4B-718-F	AACTGGTGTCTGTTCGTTCA	Luciferase reporter assay
pTaLBD4-4B-718-R	CCTCCGCCAAATTCGGAGAG	Luciferase reporter assay
pTaSCL27-1A-759-F	ACTAGGACGTGCACACAAAC	Luciferase reporter assay
pTaSCL27-1A-759-R	GGCGCTGGTCTCTATAGTCT	Luciferase reporter assay
