# Supplementary material for: Uncovering transcriptional regulatory network during regeneration for boosting wheat transformation
Source: Research Square preprint supplement (doi:10.21203/rs.3.rs-2192210/v1), 2022-10-28
Supplement: Supplementary file 5 [file 91d75dad7a6228d7ec849d98.xlsx]

## Sheet: Table S8
Table S8. Predicted ARF target genes.
GeneID	RNA.cluster	DAI0	DAI3	DAI6	DAI9	DAI12
TraesCS5B02G109200	C4	7.95878	7.84149	10.5518	14.5923	18.1508
TraesCS7A02G446300	C6	0.621013	3.19889	2.88923	2.36736	2.37817
TraesCS7B02G346000	C6	0.961751	5.3886	5.23897	5.4889	4.0973
TraesCS2A02G484000	C5	0	1.98839	0.335557	0.800627	0.290042
TraesCS2D02G483800	C5	0.113913	2.43581	0.504419	1.67734	0.98118
TraesCS2A02G428400	C3	3.62278	2.37999	2.92912	5.43033	4.1618
TraesCS5A02G377000	C6	1.20164	6.50879	4.83353	5.06277	3.45897
TraesCS5B02G380500	C6	0.332637	1.36627	0.815192	1.3875	0.678804
TraesCS5D02G372500	C6	2.42413	5.83092	5.06753	6.41628	7.4272
TraesCS5D02G387000	C6	0.739918	7.77161	7.50039	9.98452	6.26176
TraesCS1B02G103700	C5	2.37565	6.32847	3.67801	3.65616	2.90021
TraesCS2B02G066000	C3	0.185244	0.0329213	0.0370376	2.15287	0.700441
TraesCS2A02G225200	C6	36.4179	153.236	89.2885	107.555	102.009
TraesCS2B02G275100	C6	22.5557	120.921	60.3961	80.0396	73.4394
TraesCS2D02G150400	C6	0.572808	1.3202	0.298242	1.17706	1.20471
TraesCS6A02G151700	C5	9.1443	12.4153	3.28609	5.2764	4.16888
TraesCS6B02G179900	C5	4.7898	11.3952	3.40137	6.00683	5.55359
TraesCS6D02G141700	C5	16.9163	19.2759	7.73565	9.65884	7.69903
TraesCS4B02G326800	C5	4.45458	8.13075	2.35243	3.8489	2.79531
TraesCS4A02G036200	C3	0.165832	0.602153	0.293728	2.29754	0.758768
TraesCS4B02G075900	C2	0.705443	1.34355	2.12238	1.87372	1.51585
TraesCS4D02G362900	C6	0.109327	1.53019	1.84259	1.58205	0.933714
TraesCS2D02G450400	C4	0.208265	0.30548	0.837408	1.19859	1.44631
TraesCS2D02G527800	C5	2.47605	4.70561	0.879994	0.924638	0.705889
TraesCS4A02G001500	C4	0.62783	1.41298	1.30934	2.00205	3.06957
TraesCS7B02G198500	C4	0.495383	0.694921	0.38095	0.961113	2.90615
TraesCS7D02G090000	C6	0.0880872	1.01149	0.225023	0.685712	0.971774
TraesCS6A02G059400	C3	0.619344	0.71875	1.867	3.62193	2.76345
TraesCS2A02G581600	C6	7.87692	35.9601	24.2185	27.4206	15.5253
TraesCS2B02G605800	C5	5.10474	9.21659	6.84298	7.32137	3.19428
TraesCS4A02G119100	C4	1.55354	1.54167	3.63702	10.6041	16.3859
TraesCS5A02G428200	C3	0.0252335	3.61417	24.5834	33.8317	24.7405
TraesCS5B02G429700	C4	1.39098	0.673052	1.11996	3.51736	4.36804
TraesCS5B02G430100	C3	0.124535	6.84755	33.9274	51.8555	42.255
TraesCS5D02G435700	C3	0.0491629	0.47724	1.81467	4.47297	3.15524
TraesCS5D02G436200	C3	3.63932	12.5268	25.4355	52.7803	43.8599
TraesCS5B02G116100	C4	0.432718	0.329226	2.35443	11.7564	11.8898
TraesCS2B02G266600	C5	29.9213	45.0423	10.027	6.30182	2.80502
TraesCS2D02G256000	C5	18.8354	32.5803	14.3882	3.65249	1.33808
TraesCS5B02G095400	C4	0.160975	0.296284	0.907025	1.87447	2.44255
TraesCS5D02G101500	C4	2.36718	2.01126	2.74202	4.43541	6.246
TraesCS3A02G233300	C6	12.1689	37.3563	35.6115	27.2872	23.6156
TraesCS3B02G262600	C6	6.68279	37.5195	29.9637	20.4141	17.0728
TraesCS5A02G465100	C6	1.75339	5.99704	6.70478	3.64582	3.2574
TraesCS1B02G260100	C4	10.3721	12.6334	20.0339	27.6299	33.5615
TraesCS1D02G248900	C4	9.63669	12.3076	17.9279	24.0934	27.7246
TraesCS4B02G305800	C4	0.796453	0.269663	1.1236	1.45016	1.91236
TraesCS1D02G345100	C3	1.85111	3.06907	6.14274	10.2446	7.03609
TraesCS1A02G343000	C6	0.19177	1.30116	0.478027	1.16519	0.884543
TraesCS1D02G345200	C3	0.172159	0.537326	0.376232	1.47814	0.962642
TraesCS7A02G284900	C5	4.46608	17.3282	9.43686	8.90991	5.34807
TraesCS7B02G181700	C3	1.49688	3.19706	3.94622	5.57058	6.12557
TraesCS7D02G284100	C6	1.21961	3.55095	2.91583	4.30154	3.71496
TraesCS1A02G081300	C6	9.46431	34.5467	22.9469	24.8069	22.6148
TraesCS1B02G099000	C5	9.12806	23.4504	12.0721	14.9504	12.6771
TraesCS6A02G171800	C3	3.43787	7.23259	11.0451	25.3612	13.6638
TraesCS6D02G161200	C3	0.449287	2.07745	3.85264	11.7725	7.32755
TraesCS2B02G341800	C2	8.8462	16.5744	32.0099	23.0498	21.2243
TraesCS2A02G028800	C6	1.48918	4.76236	3.73313	6.57529	3.75341
TraesCS2A02G295200	C4	1.32805	2.36172	3.57418	3.67204	4.43669
TraesCS1B02G433800	C6	0.75313	2.63752	3.93069	3.40752	3.85126
TraesCS2B02G529000	C6	0.289207	3.39322	2.50969	2.93428	2.06823
TraesCS7A02G118900	C6	1.22003	41.2207	30.776	28.254	22.8768
TraesCS7A02G119000	C3	0.0273663	0.546115	1.15648	1.70097	1.03035
TraesCS7A02G119300	C2	0.240343	0.696198	2.15858	2.00622	1.03516
TraesCS7B02G015400	C3	0.689782	2.09956	3.03326	5.00957	5.43338
TraesCS7D02G114100	C6	1.71287	5.87961	7.08572	6.8898	6.55513
TraesCS7D02G114200	C6	0.580009	39.0929	28.3437	22.9046	17.8563
TraesCS7D02G116100	C3	0.0439105	0.312799	0.556462	4.39096	2.51778
TraesCS3D02G144400	C2	1.07004	0.690104	1.0679	1.07086	0.680564
TraesCS2B02G069000	C5	3.11498	6.12404	2.57893	4.56443	5.55106
TraesCS5B02G479900	C5	11.2811	23.5761	4.20029	4.10599	3.4256
TraesCS2D02G451100	C3	0.367032	0.325123	0.494216	1.1158	0.873281
TraesCS2B02G600300	C5	14.0951	14.4217	12.7641	10.1499	9.3914
TraesCS2D02G370400	C3	4.97508	5.12954	6.47412	12.1103	8.58154
TraesCS1A02G126900	C6	2.66679	11.3845	10.6112	14.4587	10.077
TraesCS1B02G147700	C5	3.62131	9.97961	5.47955	6.96478	4.16503
TraesCS1D02G126600	C6	4.02783	12.7054	7.57295	11.6327	6.25723
TraesCS2B02G060900	C6	0.106202	1.2814	0.92979	1.38727	1.46576
TraesCS4A02G216900	C2	1.54424	0.813453	18.3225	17.5219	9.05247
TraesCS4B02G095200	C2	6.02616	3.08902	32.0242	26.0645	10.5053
TraesCS4D02G092000	C2	1.28036	1.78581	22.2868	11.362	5.20007
TraesCS7B02G280300	C6	0.401619	4.45773	3.5765	3.40204	4.81917
TraesCS4A02G315900	C5	1.39857	3.75597	1.88299	2.51496	2.42508
TraesCS3A02G122500	C5	4.04751	5.05793	4.22016	5.0163	2.32624
TraesCS3A02G285100	C5	0.558932	13.5961	3.72548	2.46049	0.744155
TraesCS7A02G356100	C5	0.942966	4.34725	1.66253	1.16698	0.854772
TraesCS7B02G271600	C5	0.28837	3.48214	1.12859	0.60654	0.411106
TraesCS7D02G366600	C5	0.858268	1.99411	1.30236	1.18135	0.765309
TraesCS2A02G474100	C5	1.13521	4.14412	1.73239	2.3239	2.3494
TraesCS2B02G497600	C5	1.82273	7.11122	4.55416	3.63874	3.62712
TraesCS6A02G333600	C6	2.82463	8.49375	9.45425	6.70172	7.00178
TraesCS7B02G075600	C3	3.72897	17.3361	18.547	32.7505	26.8909
TraesCS7D02G171300	C3	7.12199	27.2578	25.8972	45.1998	35.254
TraesCS1A02G424300	C3	2.84721	0.89453	3.0648	5.29796	2.99549
TraesCS1B02G456600	C3	3.05573	2.40977	4.53042	6.7074	4.25918
TraesCS3D02G228600	C6	3.43026	8.19452	3.74998	7.94018	5.5118
TraesCS1A02G272300	C5	0.0769441	13.2045	2.34079	1.67878	0.903349
TraesCS1D02G272600	C5	0.14985	8.61514	4.32652	2.51826	1.39468
TraesCS3B02G412500	C5	3.97768	13.7922	8.33867	7.43904	5.74383
TraesCS5A02G068700	C3	5.09249	6.30114	13.9854	15.2944	11.103
TraesCS5D02G080700	C3	7.01492	6.89666	14.7067	16.7545	13.5182
TraesCS5D02G142900	C3	2.59541	14.1187	15.4158	23.8874	21.1177
TraesCS4A02G388700	C5	0.173139	3.92193	0.0776976	0.0527945	0
TraesCS4A02G389100	C5	0	1.84586	0.20841	0	0
TraesCS7A02G089500	C5	3.06387	25.1722	5.14327	1.27958	0.369422
TraesCS7A02G089600	C5	1.11477	3.59207	0.199947	0.0297747	0
TraesCS7D02G084800	C5	0.581257	6.95977	0.277311	0.351099	0.0614137
TraesCS7D02G085000	C5	0.158752	1.89757	0.28286	0.149289	0
TraesCS7D02G085100	C5	0.0240919	1.72843	0.621035	0.0600508	0.054545
TraesCS2B02G454000	C2	19.6348	11.3281	24.2917	9.91982	5.9798
TraesCS6A02G152700	C2	11.5413	8.26172	18.4925	16.7692	12.3702
TraesCS6D02G142400	C2	7.63817	3.80595	7.74103	7.05472	6.02353
TraesCS7A02G254400	C6	3.97168	11.5271	14.3149	15.2048	10.1366
TraesCS7B02G150600	C6	3.45671	10.1981	15.1411	14.6212	9.83087
TraesCS7D02G252900	C6	2.56817	8.67876	12.0236	12.0053	9.15137
TraesCS4D02G227800	C3	5.50592	4.12198	3.74288	6.83291	5.64274
TraesCS4A02G356400	C6	9.37449	16.7929	19.9561	16.7128	9.85095
TraesCS5B02G090600	C5	14.693	32.9598	12.5401	17.3555	9.00541
TraesCS5D02G097100	C5	18.3512	37.6663	14.0624	18.2935	8.92676
TraesCS3B02G221800	C5	26.8709	33.6423	26.7584	20.9905	13.8145
TraesCS4B02G335100	C5	66.8343	207.098	89.3923	71.1602	51.0786
TraesCS5A02G505000	C5	39.747	116.76	68.9804	55.6962	41.3288
TraesCS6A02G220400	C5	0.912887	2.82502	0.732559	1.20821	0.539854
TraesCS6D02G214800	C5	0.999645	2.36311	0.307304	0.647958	0.238793
TraesCS7A02G315200	C4	5.84693	13.2275	26.7063	28.2715	37.8772
TraesCS7B02G215700	C4	8.56068	8.72425	22.2214	22.1797	31.6998
TraesCS7D02G312200	C2	8.63547	8.20307	42.6211	36.4356	41.752
TraesCS4A02G256500	C5	1.51238	8.74766	0.576747	0.391752	0.403144
TraesCS4B02G058200	C5	0.113847	7.6623	0.808254	0.936934	0.40635
TraesCS2A02G396400	C5	0.96156	4.89908	0.511002	1.02909	1.51797
TraesCS2B02G414800	C5	2.46996	12.5575	0.693447	3.08142	4.08354
TraesCS1B02G283900	C5	78.498	136.602	81.632	52.4194	45.2673
TraesCS7D02G143200	C3	2.3207	1.63528	1.84417	12.9017	4.30239
TraesCS1A02G174900	C3	0.650451	0.29699	0.426688	1.95971	1.47884
TraesCS6A02G237300	C3	0.943629	2.30651	2.41471	3.89862	2.5101
TraesCS6D02G219900	C3	0.206789	0.542102	1.07473	1.65866	1.49838
TraesCS7A02G069300	C5	6.52612	25.605	10.4508	8.55354	9.60536
TraesCS7B02G322500	C6	1.60635	10.6689	7.3988	7.83855	6.70706
TraesCS4A02G071400	C5	14.4603	27.3875	10.8691	19.9781	18.3741
TraesCS1A02G370100	C3	2.15181	0.212987	2.99557	11.0608	5.55531
TraesCS1B02G389200	C2	0.150429	0.264966	3.28179	2.66957	2.0436
TraesCS4B02G106400	C3	1.05975	0.100246	3.29863	10.2534	5.50944
TraesCS6A02G223400	C5	114.267	127.951	109.932	108.242	86.817
TraesCS5B02G111400	C6	19.1128	68.6601	57.5646	50.7116	38.8198
TraesCS7B02G285200	C5	12.8798	40.7137	14.0716	13.4144	7.19639
TraesCS7D02G378900	C5	18.3918	44.6983	17.8751	17.2933	9.15336
TraesCS1A02G425000	C5	33.3605	76.2848	38.1223	35.9204	33.4554
TraesCS1B02G459400	C5	48.2837	111.774	63.2798	57.6031	51.0308
TraesCS1D02G434000	C5	29.4708	93.3584	47.1883	39.1409	33.9908
TraesCS6B02G426300	C4	8.08751	5.58902	7.05351	8.77336	9.88922
TraesCS2B02G096300	C6	0.95825	7.59922	6.86975	7.71463	5.88739
TraesCS2A02G444300	C5	6.11094	27.1532	12.9547	12.0149	13.3229
TraesCS2B02G465400	C5	2.69041	13.1668	8.46855	6.81117	6.01002
TraesCS7B02G079000	C4	0.084789	1.01568	1.30474	3.44825	5.83139
TraesCS2A02G286200	C4	20.2738	24.9013	44.9343	73.6094	110.66
TraesCS2A02G176300	C5	25.4213	42.3574	30.23	15.635	13.2178
TraesCS2B02G202700	C5	23.2334	39.4245	25.664	15.295	15.1855
TraesCS2D02G183700	C5	29.4179	36.5932	31.5869	16.6121	14.4422
TraesCS7A02G496600	C5	0.612014	5.17982	1.32094	3.10297	3.1966
TraesCS1A02G164900	C5	0.666618	12.2822	4.54977	5.95521	5.08763
TraesCS1D02G162000	C5	1.78045	18.3294	6.63394	1.53553	1.07857
TraesCS1A02G164800	C2	7.1439	17.8224	44.1333	30.6889	29.6054
TraesCS1B02G181800	C3	2.46973	3.40785	4.9521	8.31071	3.64991
TraesCS1D02G161900	C2	5.21215	12.1141	27.254	25.7392	14.0099
TraesCS5B02G170600	C3	0.521765	0.747969	1.90698	2.38367	1.43699
TraesCS2A02G105900	C3	2.58995	1.86043	1.67093	4.535	3.52738
TraesCS6D02G152000	C5	12.1701	20.7367	10.1292	11.8551	6.42223
TraesCS6B02G259800	C6	3.07464	6.04417	6.91355	4.76152	2.95715
TraesCS6D02G213800	C5	3.46313	4.80732	4.92805	3.83052	2.65054
TraesCS2B02G230900	C4	24.6971	33.5718	70.4158	116.617	128.007
TraesCS5B02G471900	C5	0.610042	2.11731	0.26572	0.534	0.128118
TraesCSU02G081900	C4	17.1765	7.98355	6.64057	19.8239	26.6852
TraesCS2A02G419500	C4	1.72547	0.971284	1.45619	1.61454	1.72813
TraesCS1B02G480100	C4	34.9885	11.5067	41.227	48.014	55.2726
TraesCS3B02G287600	C5	0.419196	5.77441	2.12052	1.899	1.86686
TraesCS5B02G451400	C6	0.214989	2.88685	1.91317	2.054	2.47733
TraesCS5B02G454200	C5	0.337164	1.35525	0.621157	0.448433	0.246406
TraesCS5B02G455700	C5	0.418583	2.2548	0.985561	0.666873	0.254805
TraesCS5D02G192700	C5	1.16804	4.57952	3.41897	2.30567	1.43962
TraesCS5D02G454200	C5	0.168746	1.27289	0.554908	0.162039	0.131276
TraesCS5D02G169500	C2	3.63076	6.24235	12.5363	10.529	10.1012
TraesCS1A02G299100	C5	6.3933	7.07902	4.4355	4.81671	2.73813
TraesCS1B02G308900	C3	14.0967	20.4169	12.2548	57.991	27.497
TraesCS3A02G198400	C2	0.983673	0.487404	1.04749	1.25933	0.872787
TraesCS3D02G196700	C2	2.5024	1.63099	2.53185	2.10316	1.80117
TraesCS3A02G433200	C4	1.74489	7.12987	6.96691	9.63893	12.1697
TraesCS3B02G469000	C3	0.957542	7.51232	5.82063	10.1746	12.3479
TraesCS3D02G426600	C3	2.65654	9.57486	9.25008	13.3776	15.6282
TraesCS6A02G312500	C5	5.38824	5.69122	4.27411	4.28249	5.24402
TraesCS7A02G248500	C3	11.4152	19.9002	29.4389	33.0094	36.6001
TraesCS7B02G143000	C4	36.0113	24.375	34.8974	52.3921	57.036
TraesCS1A02G190900	C4	13.9135	11.5525	32.9403	38.4634	43.8279
TraesCS1B02G206100	C4	26.2183	18.0435	64.7325	75.0029	83.7768
TraesCS1D02G194900	C4	18.1141	12.7641	36.2468	43.3225	49.3775
TraesCS5D02G199600	C4	0.0632303	0.122836	0.884045	1.87339	2.16173
TraesCS6B02G209300	C4	0.0456476	0.248915	1.12821	5.19359	8.35676
TraesCS7A02G225700	C2	0.508925	0.878641	2.43698	1.83585	1.88813
TraesCS7B02G215600	C2	4.96228	7.3109	15.9452	14.8402	14.7144
TraesCS7D02G312100	C2	4.82439	10.4405	21.4912	18.0261	16.2818
TraesCS7B02G316500	C3	12.9953	14.2349	9.73344	18.5843	16.3677
TraesCS7D02G409600	C5	9.36445	12.3282	4.69292	9.81742	8.99692
TraesCS4A02G011600	C5	8.86314	59.3363	25.806	25.2543	14.6467
TraesCS4B02G292900	C5	10.7511	71.2398	30.9458	28.7582	12.9075
TraesCS7A02G495800	C4	1.14409	1.80662	15.7858	15.6204	18.3489
TraesCS7B02G401400	C3	5.07833	2.70857	35.9737	41.6841	44.5696
TraesCS7D02G483200	C2	3.97661	8.07675	39.0355	35.0243	37.2034
TraesCS3A02G077000	C6	7.33275	25.187	14.607	19.6916	14.8532
TraesCS3A02G362200	C5	10.141	21.7467	12.7902	7.41078	6.57258
TraesCS5A02G255900	C3	0.0357855	0.0292769	2.15642	6.50177	5.92986
TraesCS5D02G264000	C3	2.68211	5.14954	4.45566	10.5896	4.8263
TraesCS2A02G252700	C2	5.08936	3.51718	7.89714	7.16362	7.26294
TraesCS2B02G272400	C2	3.01636	2.55842	5.61133	5.56485	4.87697
TraesCS1D02G308200	C4	20.8699	3.22938	6.22929	21.6355	39.4175
TraesCS1A02G282600	C3	0	0.0200923	0.0243824	1.09561	0.33019
TraesCS3A02G363400	C5	34.3913	43.9142	25.1739	30.5142	18.5927
TraesCS3B02G395600	C5	8.113	16.2435	8.39164	2.47599	2.73897
TraesCS3D02G357000	C5	0.562238	54.4564	21.5948	15.7244	7.98449
TraesCS3B02G265500	C5	0.877191	6.47753	2.87139	2.76506	1.30759
TraesCS3D02G219600	C5	0.942357	3.5919	0.689024	1.12867	0.756951
TraesCS2B02G198500	C4	4.6587	3.1151	4.15122	6.32903	5.69495
TraesCS4A02G227900	C4	38.9831	26.4472	41.1694	46.7943	49.9596
TraesCS4D02G085300	C4	34.0248	21.8164	37.338	36.7175	41.0962
TraesCS4A02G341100	C6	1.67577	5.80306	6.1219	5.23772	4.61773
TraesCS5D02G531600	C6	3.14697	11.232	9.00852	9.78724	8.40647
TraesCS6B02G408100	C4	42.5626	27.9644	29.0287	48.7675	40.8364
TraesCS6B02G321400	C5	0.365273	3.88038	0.695252	0.371829	0.261754
TraesCS6D02G272400	C5	0.0202858	5.62029	1.7478	1.27308	1.32415
TraesCS7D02G211900	C5	24.2058	71.7883	31.2807	63.9719	38.9932
TraesCS3A02G212300	C3	0.0371854	0.0141301	0.535848	6.78094	3.37732
TraesCS2D02G386700	C6	1.04245	13.4955	7.47608	13.4052	7.23664
TraesCS6D02G222300	C3	0.107524	1.86942	0.614482	3.47012	2.0892
TraesCS4A02G219900	C6	15.5126	72.5957	90.8572	88.9699	42.6549
TraesCS4B02G098300	C3	5.80934	15.7027	19.0801	41.2989	20.7009
TraesCS4D02G094500	C5	12.4603	32.5582	17.4104	28.8488	14.7898
TraesCS6A02G155500	C6	29.6161	58.0778	55.5066	51.0728	31.0475
TraesCS2A02G364300	C3	3.42185	3.91448	10.1823	13.2838	10.5143
TraesCS2A02G357900	C6	0.868983	4.11197	3.30133	4.06123	3.40439
TraesCS2D02G356700	C3	2.49698	5.36351	6.3818	7.85905	6.20226
TraesCS2D02G295900	C2	0.140152	0.705006	3.47469	2.43723	1.70506
TraesCS7A02G208700	C5	6.25011	11.3166	5.50934	6.48949	7.51659
TraesCS7A02G220200	C4	1.7646	0.681177	0.463064	1.4579	2.57345
TraesCS3A02G204500	C3	3.33571	4.97813	9.77327	16.584	10.1623
TraesCS3A02G528900	C6	0.690355	25.6582	17.6129	28.24	11.6251
TraesCS3D02G534100	C3	0	1.52784	0.564856	2.19365	2.37173
TraesCS3D02G534200	C3	0.150899	13.6329	7.17075	21.0456	8.83941
TraesCS5B02G227600	C3	0	0.825265	0.0314082	3.88203	0.820162
TraesCS5D02G153500	C3	0	0.968914	0.0949778	1.86754	0.280037
TraesCS2A02G562400	C4	0.549628	1.41049	0.575397	0.90697	1.79291
TraesCS2B02G603900	C4	1.6897	1.8709	1.2549	2.7157	2.59474
TraesCS7B02G223000	C5	3.25397	8.49087	4.71162	5.36748	3.7264
TraesCS2A02G087000	C4	13.9662	25.7136	33.0311	39.6355	46.3633
TraesCS2B02G101700	C3	6.25393	21.5781	31.9908	36.8718	34.9784
TraesCS3A02G240000	C2	19.8098	10.0694	19.892	16.3066	13.1255
TraesCS3D02G240400	C5	5.26005	11.0447	12.7202	7.14926	5.10799
TraesCS2D02G362900	C5	0	16.7893	4.38542	5.89418	4.1359
TraesCS1A02G295300	C3	0.082633	4.20088	2.60492	5.74388	6.18976
TraesCS3B02G276700	C5	1.94842	2.40904	1.90368	1.5624	0.834916
TraesCS5A02G493200	C4	7.12662	3.48241	5.81595	8.07769	9.04119
TraesCS1B02G192200	C5	0.0388411	1.76661	0.0310401	0.0342369	0.0311432
TraesCS1D02G194200	C5	0	7.6272	1.36074	1.54695	0.894553
TraesCS4D02G325700	C4	0.269876	0.215601	3.60769	5.941	7.04917
TraesCS4D02G325800	C4	0.123331	0	0.439697	1.24176	1.353
TraesCS7A02G549000	C3	0	0.427801	0.854511	1.02482	0.388771
TraesCS5A02G275900	C3	0.015618	0.0178041	0.137027	4.31443	1.70814
TraesCS5B02G275200	C3	0	0	0.0399559	1.86405	0.552275
TraesCS5D02G283200	C3	0	0.0684356	1.73991	7.54336	3.95353
TraesCS6A02G208900	C3	4.13668	6.02254	13.9377	15.6471	17.1211
TraesCS6A02G378500	C3	0	0.0212395	0	2.19398	0.185071
TraesCS6B02G416500	C3	0	0	0	1.44751	0.192413
TraesCS6A02G300400	C2	6.84272	1.51684	23.3295	22.2171	13.0942
TraesCS6B02G330100	C3	15.5544	16.1832	50.7025	58.4136	39.449
TraesCS6D02G280300	C3	1.37153	3.21052	38.846	55.829	35.5985
TraesCS7A02G180100	C6	20.4535	127.656	90.1754	90.2412	62.8515
TraesCS1B02G092400	C3	0.234044	0.914853	0.966747	1.53135	1.29075
TraesCS5A02G203000	C4	15.9017	9.90629	14.3891	17.4713	16.8804
TraesCS5A02G200800	C2	4.38105	4.05794	17.8864	12.1445	8.62406
TraesCS5B02G199400	C2	4.23713	3.20762	16.0629	10.0305	8.05762
TraesCS2B02G344000	C3	0.261674	2.11438	5.30753	8.83	4.05591
TraesCS6A02G292300	C3	7.40846	0.365685	1.90155	12.219	7.52295
TraesCS6B02G322700	C3	1.61057	0.175741	2.28281	18.6511	11.768
TraesCS3A02G351400	C5	0.611627	2.33263	1.8194	0.496277	0.136845
TraesCS3B02G383900	C5	0.241122	11.4023	4.66994	0.594555	0.279213
TraesCS3D02G345600	C5	1.03984	4.49159	0.355251	0.0651939	0.0395928
TraesCS2A02G267600	C4	0.222103	0.620706	2.09309	2.9224	4.50855
TraesCS2B02G268100	C2	0.313559	0.766681	3.36923	2.04117	2.43309
TraesCS2D02G256600	C4	0.653697	0.429076	2.4114	2.28956	3.79245
TraesCS2A02G279700	C5	1.44698	2.84313	1.02727	0.672238	0.848925
TraesCS2B02G297200	C5	0.767957	1.21532	0.360804	0.466851	0.437298
TraesCS5B02G485400	C5	1.57242	9.0968	3.79028	3.61001	2.60068
TraesCS5B02G485500	C5	5.26585	12.6414	5.37167	6.60324	5.897
TraesCS6A02G334800	C4	20.4794	19.5487	14.8597	30.2102	32.414
TraesCS2B02G459300	C6	0.893035	5.84909	4.89714	7.77463	7.91352
TraesCS6D02G245800	C2	0.315291	0.22259	2.23201	1.18553	1.09166
TraesCS2A02G514200	C3	0.644999	1.78993	2.55784	7.49891	6.9819
TraesCS2B02G542400	C3	0.684422	7.01382	8.32959	11.4343	10.4093
TraesCS2D02G515800	C4	0.067013	0.409231	0.593458	1.54835	1.80845
TraesCS1A02G404500	C4	129.353	71.7734	87.3407	144.899	118.417
TraesCS1B02G434000	C4	156.641	82.0847	98.1454	166.725	137.555
TraesCS6D02G327000	C4	2.31837	2.8598	4.95892	5.33396	6.40638
TraesCS5A02G020800	C6	1.93961	5.63811	8.34841	7.74931	8.07013
TraesCS5D02G025900	C6	1.79231	4.11817	6.5839	6.24029	6.36138
TraesCS4D02G232400	C2	0.263481	0.939971	1.50359	1.01632	0.718113
TraesCS1A02G090300	C2	3.42647	2.81037	8.62509	6.29685	5.27896
TraesCS1B02G118300	C2	2.41222	3.03414	6.81707	6.08101	4.3241
TraesCS1D02G098700	C2	6.1223	4.39994	9.78243	5.92877	5.06227
TraesCS6D02G272600	C3	5.81012	22.3768	21.1227	33.7084	29.0812
TraesCS7A02G208600	C6	0.0658949	2.18418	1.46944	1.89948	1.18935
TraesCS7B02G115900	C6	0.187004	1.13411	0.581708	0.726638	0.671441
TraesCS7D02G211000	C6	0.913627	13.7478	5.87003	10.1939	5.25045
TraesCS1A02G075700	C5	3.29279	4.33217	3.38708	2.72901	2.43001
TraesCS3D02G216700	C5	22.5734	116.504	73.313	48.2476	46.0928
TraesCS3A02G530200	C4	4.19983	5.15298	9.1157	14.2312	16.5622
TraesCS3B02G600300	C3	0.359592	1.25639	6.42192	9.8659	10.4789
TraesCS3D02G535700	C4	2.68036	6.10625	8.90251	18.4903	20.4884
TraesCS1B02G449700	C5	63.3524	75.3034	89.3789	59.7713	32.2159
TraesCS6A02G227900	C2	3.97998	7.61581	22.4845	10.333	9.45049
TraesCS5A02G320300	C3	1.74002	1.01495	5.2534	5.90687	5.81283
TraesCS5B02G175800	C6	1.58352	12.3334	7.35356	11.2976	6.00105
TraesCS5A02G382900	C3	40.409	64.3792	115.295	141.718	149.863
TraesCS5D02G392300	C3	36.8722	46.8065	97.3087	116.292	107.193
TraesCS5D02G078700	C6	29.1421	103.272	82.283	96.1203	95.4228
TraesCS4A02G364800	C4	16.8232	27.945	45.7169	45.8363	66.5577
TraesCS4B02G020400	C6	1.00394	3.58827	3.10165	3.20108	3.63795
TraesCS5D02G508700	C6	9.60797	27.2142	29.06	22.7651	28.8136
TraesCS6D02G249500	C6	0.567705	2.77139	2.82903	2.6251	2.17206
TraesCS4A02G407800	C5	0.28429	1.57574	0.785544	0.694386	0.781128
TraesCS5D02G202100	C3	0.419684	1.97593	2.33253	5.31576	4.6711
TraesCS2A02G102100	C5	6.45839	16.0979	11.7124	11.307	7.16654
TraesCS3B02G019300	C4	11.8294	7.69628	10.9411	18.5837	22.3041
TraesCS1D02G123200	C6	0.196619	1.65613	1.48812	1.83043	1.77206
TraesCS7A02G256000	C5	16.4023	38.4435	39.7806	26.4563	15.9696
TraesCS5A02G356200	C6	0.741673	1.86166	2.04233	2.52878	1.90889
TraesCS4A02G027800	C5	131.872	149.137	106.344	126.97	95.4048
TraesCS1A02G375800	C6	0.782647	17.7318	9.36088	15.6542	12.5295
TraesCS1A02G156600	C2	2.56189	12.878	67.8242	54.6011	36.3984
TraesCS1B02G173700	C2	0.926394	3.17766	16.7219	15.5488	10.547
TraesCS1D02G155100	C2	2.06723	5.83708	40.4718	32.3686	17.3203
TraesCS7A02G446900	C3	2.41566	3.31223	10.8704	24.6552	13.3998
TraesCS7B02G346700	C3	3.82555	3.42978	11.0964	16.1449	11.1993
TraesCS7D02G436800	C3	4.58022	6.09812	9.70796	15.4957	11.0339
TraesCS3B02G293000	C4	13.2129	6.57094	9.53223	12.2476	14.3374
TraesCS4B02G325600	C2	0.399757	0.120296	1.22387	0.316489	0.196064
TraesCS7A02G160800	C2	4.72846	2.19316	16.2839	13.6421	9.99407
TraesCS7B02G065800	C3	5.0149	1.52189	11.9471	13.8327	10.7379
TraesCS7D02G161900	C2	3.39194	1.51333	13.0121	12.1221	8.71926
TraesCS1B02G347900	C5	6.84964	10.5418	7.89554	6.18896	5.34217
TraesCS1B02G424700	C2	8.86303	12.3086	33.7606	22.0986	21.9792
TraesCS1D02G337400	C5	15.882	20.4082	12.9205	8.46358	7.64846
TraesCS3D02G245400	C2	2.13207	1.90998	5.43332	3.52873	2.65542
TraesCS2A02G491000	C2	4.23545	4.72354	11.6585	8.13665	10.2961
TraesCS2B02G519200	C2	2.15436	2.07025	5.67894	5.47572	5.43124
TraesCS2D02G491200	C4	4.63337	3.02862	7.56432	7.99505	8.65674
TraesCS6B02G167100	C2	1.42544	3.89157	11.1314	7.77806	6.9262
TraesCS6D02G127600	C2	1.54082	4.86467	11.5898	9.33697	8.50308
TraesCS7A02G461700	C6	4.10271	29.0586	27.6544	18.8273	16.6621
TraesCS7D02G449900	C6	5.09014	39.1273	33.5942	29.6998	31.9355
TraesCS2A02G547800	C4	3.48476	1.7507	2.86967	3.75535	3.72925
TraesCS2D02G548900	C4	0.602196	0.661571	1.59127	2.39184	2.95556
TraesCS3D02G330500	C5	39.1871	90.1767	57.5691	61.5903	48.3563
TraesCS2A02G035700	C5	1.25148	11.1478	5.77929	6.29689	3.19217
TraesCS2B02G048700	C5	20.8232	117.547	65.3704	55.6093	52.8251
TraesCS4B02G070800	C3	0.445343	2.44283	3.0625	6.07124	6.60083
TraesCS5B02G328200	C4	2.94489	2.09761	2.99149	2.62195	3.32492
TraesCS5D02G334100	C4	18.8074	9.30295	14.0489	17.8334	22.8605
TraesCS3A02G330300	C5	15.1718	24.207	19.7054	13.1612	9.24635
TraesCS4B02G111500	C5	213.372	499.235	350.446	242.578	231.304
TraesCS6D02G194100	C5	4.30299	5.17357	3.08232	3.46488	2.50146
TraesCS7A02G311700	C6	0.670635	3.92846	3.25838	3.60962	2.61988
TraesCS7B02G211500	C3	2.30803	3.31663	4.50863	7.33178	6.93414
TraesCS7D02G308200	C6	1.32476	3.42282	3.30927	4.30254	4.53715
TraesCS2B02G040300	C4	6.31488	5.55291	10.1158	11.8165	13.4043
TraesCS2A02G385000	C6	0.299446	1.10238	1.41924	0.548343	0.314576
TraesCS7D02G472400	C3	1.98678	6.7996	8.96443	11.4409	7.31826
TraesCS2D02G105700	C4	7.55023	10.8847	7.63636	13.1894	16.4249
TraesCS6A02G146200	C4	25.5864	10.6739	20.9144	38.1658	41.0234
TraesCS6B02G174400	C4	25.0327	9.92313	19.147	32.3733	35.7365
TraesCS5D02G430500	C6	2.2405	5.26333	5.56093	6.44606	6.85665
TraesCS5D02G093100	C4	4.03929	1.40736	2.51343	5.29725	9.19
TraesCS2A02G098400	C6	0.577571	2.47225	1.83391	3.15947	2.97099
TraesCS4A02G186500	C5	2.73768	4.45606	1.46584	1.20041	0.946765
TraesCS4A02G188300	C3	0.596731	1.36582	0.679635	2.56518	1.78493
TraesCS4B02G177900	C3	1.31479	0.902904	1.74077	12.8333	7.63852
TraesCS4D02G125100	C3	0.845156	1.96624	1.19529	4.25964	2.42969
TraesCS4D02G179500	C3	0.678592	0.67124	1.31927	6.28134	4.54169
TraesCS5B02G138700	C3	2.84499	7.85303	8.65267	11.4356	12.3366
TraesCS1A02G269300	C6	2.74153	13.7834	11.3486	11.0476	13.7082
TraesCS1B02G279800	C6	3.16646	14.589	15.0556	13.2692	17.5115
TraesCS1D02G269400	C6	3.15069	13.3831	14.8548	14.3942	16.7713
TraesCS3A02G265000	C4	0.689827	1.33064	2.362	3.46581	5.17215
TraesCS3B02G298600	C4	4.33584	7.51408	16.0282	11.5542	19.8607
TraesCS7A02G364700	C6	1.16837	2.65866	3.90241	3.16816	3.32383
TraesCS5A02G331300	C5	44.8134	103.415	23.0536	30.9415	25.0054
TraesCS5B02G331700	C5	13.1877	61.0603	16.0827	13.5021	5.2358
TraesCS5D02G337200	C5	82.899	191.11	76.6776	82.4581	69.1218
TraesCS7A02G353500	C5	8.9801	27.6172	9.81714	10.4384	3.54755
TraesCS7B02G274100	C5	6.21284	45.503	32.3321	17.1054	5.84984
TraesCS4D02G164600	C3	3.71222	9.79419	10.0799	18.5746	13.7339
TraesCS6A02G008800	C3	0.255975	0.759688	1.25842	1.7455	1.43914
TraesCS6D02G009900	C4	1.76058	1.23048	2.06568	3.01268	3.92218
TraesCS7A02G024800	C3	0.388852	0.774627	1.51963	3.12299	2.49142
TraesCS7B02G217500	C3	0.669965	0.416561	2.64434	3.29663	3.31824
TraesCS7B02G168500	C3	1.14956	0.097112	0.605306	1.78318	0.906474
TraesCS7D02G270700	C3	1.33128	0.366785	1.96396	2.96764	1.79581
TraesCS2A02G150300	C4	2.83573	4.73857	9.06273	9.60842	13.9553
TraesCS2B02G175500	C6	1.73902	4.51707	8.06168	6.94652	8.51494
TraesCS2D02G155400	C4	1.59348	2.59886	5.36277	4.73217	6.48246
TraesCS6B02G068000	C5	0.874292	2.54937	2.17872	2.1022	0.714138
TraesCS7A02G336000	C4	1.97109	1.4977	1.18614	2.31484	3.92436
TraesCS7B02G247600	C4	1.47147	0.749129	0.758981	3.83731	7.37025
TraesCS7D02G343700	C4	1.71422	1.0742	0.383231	1.5022	2.86209
TraesCS1B02G157500	C2	0	0.20384	1.24701	1.06032	1.03128
TraesCS2A02G395800	C5	1.77821	1.97305	0.544065	0.488391	0.621617
TraesCS2B02G414100	C5	1.5031	2.47637	1.29535	0.86285	1.24261
TraesCS2D02G393500	C5	17.7298	21.3539	9.54958	7.19984	6.71782
TraesCS3D02G433800	C3	0.0844277	0.874644	0.807663	1.8487	0.714504
TraesCS2D02G405600	C5	7.00358	9.10602	5.29727	5.94397	4.78115
TraesCS7B02G230500	C3	2.41273	5.0196	6.15076	7.72849	6.32142
TraesCS2A02G371000	C3	2.41607	2.06245	1.67034	9.0209	6.40656
TraesCS2D02G367400	C3	1.98613	9.28747	6.37207	14.3924	11.6248
TraesCS2D02G367700	C5	0.447021	6.16751	2.50995	0.509281	0.236348
TraesCS1B02G196200	C4	16.8627	7.73985	13.653	14.0191	16.7591
TraesCS4B02G355300	C6	1.45901	5.33169	2.63509	4.46208	6.10856
TraesCS4D02G348700	C4	1.08324	6.1359	4.00223	8.21714	12.4795
TraesCS5A02G524500	C4	0.597801	2.27386	2.11583	5.17269	7.7918
TraesCS6A02G243100	C6	0.0267325	1.45082	1.08552	1.03874	0.470812
TraesCS6D02G225400	C5	0.571184	1.83698	0.728254	0.655745	0.65811
TraesCS1A02G082400	C4	0.269657	0.0422211	0	0.964998	1.1461
TraesCS4B02G254200	C6	0.967022	2.62072	3.40722	2.83098	3.75027
TraesCS4D02G254000	C6	0.65257	2.60824	2.92825	1.83217	2.27455
TraesCS1A02G206100	C5	0.528602	1.90882	1.66373	0.852157	0.344956
TraesCS1A02G225700	C3	0	0.0604803	0.260891	2.5895	1.42895
TraesCS1B02G219700	C5	0.68485	2.35421	1.45016	0.570604	0.173469
TraesCS2B02G110300	C5	3.31526	5.34746	2.56157	2.45743	1.51517
TraesCS2D02G093500	C5	5.26916	8.3096	5.39479	4.6844	3.17727
TraesCS4D02G186900	C3	8.18558	6.87103	10.6909	17.6329	10.3044
TraesCS2B02G274500	C3	2.21676	6.31568	19.7362	18.897	20.6475
TraesCS1D02G173300	C6	0.911286	3.09408	1.88033	3.44054	2.47686
TraesCS5A02G058500	C3	1.13454	2.40277	0.982124	2.87601	2.77071
TraesCS5A02G441900	C3	2.6192	4.94239	7.79224	13.6811	14.0559
TraesCS5B02G445900	C3	3.52027	6.56334	7.01774	18.623	16.5051
TraesCS5D02G449200	C3	5.24832	9.58092	6.82302	17.6697	11.8005
TraesCS5A02G533600	C6	0.775356	2.96201	3.77032	3.38581	4.14938
TraesCS3A02G183100	C6	0.547227	2.6846	2.41817	3.54741	2.36336
TraesCS3A02G183200	C3	0.826761	1.63033	7.36698	11.7355	11.6993
TraesCS4A02G184800	C5	1.41041	10.518	3.49274	6.55968	2.03391
TraesCS4B02G133900	C5	0.43467	10.1581	6.93244	6.05919	1.12227
TraesCS4D02G128800	C5	0.525629	14.3743	7.24599	6.88647	1.39566
TraesCS2A02G134900	C5	9.59698	16.3842	12.0325	14.444	8.94231
TraesCS2B02G453400	C3	1.50706	1.74767	3.54624	4.36661	4.03893
TraesCS2D02G429900	C3	0.915126	2.33152	3.1476	4.88334	4.70284
TraesCS7D02G220200	C6	0.282951	2.21563	2.09612	1.74073	1.2584
TraesCS1D02G254200	C4	4.44405	0.771132	4.30527	4.63457	4.7145
TraesCS1A02G236000	C2	8.08131	7.36083	11.009	8.45184	5.66249
TraesCS3A02G473900	C3	20.6397	10.4593	24.0352	28.6924	23.849
TraesCS3B02G327400	C4	36.7715	42.3123	85.0571	96.6366	113.874
TraesCS6A02G386900	C4	2.00016	1.63279	4.86828	4.60502	10.1308
TraesCS1A02G325800	C6	1.52318	11.4081	10.5188	9.82927	7.3771
TraesCS1B02G339100	C5	2.43395	40.733	17.1242	9.21358	6.25309
TraesCS1D02G327600	C5	0.590893	6.2038	2.53033	3.17484	2.04244
TraesCS4A02G245900	C3	0.0120133	0.0655318	0.0583184	2.23558	0.890678
TraesCS4D02G068300	C3	0.0115283	0.0118629	0	1.23258	0.33476
TraesCS4A02G235500	C5	0.746199	1.23293	0.599793	0.375798	0.410154
TraesCS1D02G147700	C5	0.0511159	1.0525	0.217369	0.00953003	0.017363
TraesCS5A02G509800	C5	2.43248	2.87323	1.49469	1.83508	1.52209
TraesCS4D02G122300	C6	2.9442	7.00324	9.79796	9.3634	7.61425
TraesCS2A02G016500	C3	0.689775	2.59059	10.1769	13.3009	7.57994
TraesCS2B02G024500	C3	2.07467	1.73682	12.4236	31.7799	12.1497
TraesCS1D02G325300	C6	1.88427	21.0554	16.5218	23.4331	21.5749
TraesCS7B02G291000	C4	5.55928	3.95836	3.9788	5.8489	5.25118
TraesCS7D02G385100	C3	3.94663	3.18227	3.2794	12.1074	10.6224
TraesCS5B02G259800	C5	13.7856	31.605	13.1225	18.3132	11.5368
TraesCS5D02G269000	C5	4.05623	17.113	7.66359	9.1177	5.96444
TraesCS5D02G268700	C3	0.890343	3.24804	3.83675	6.11863	5.14972
TraesCS6A02G325900	C4	0.0254056	10.5449	45.6713	82.2308	102.5
TraesCS6D02G305600	C5	0	22.9999	26.2734	6.07559	2.86845
TraesCS5A02G412700	C5	3.67024	4.71886	2.97894	3.10192	2.18412
TraesCS5B02G416300	C5	8.55826	11.8884	7.04531	5.34633	3.86158
TraesCS5D02G421600	C5	25.1774	36.9599	17.6473	12.2826	12.6568
TraesCS3B02G116100	C3	0	0.0687259	0.330126	2.64446	0.992647
TraesCS4B02G243300	C4	1.88085	1.74234	9.50954	7.70524	12.1649
TraesCS5D02G395300	C4	10.1634	6.66744	9.25812	10.3826	10.3128
TraesCS2A02G223300	C6	0.503044	1.95624	2.39163	2.675	2.70368
TraesCS2B02G273600	C6	0.228867	1.32812	1.94963	1.47145	1.86364
TraesCS3B02G366100	C4	0.47216	0.621147	0.519693	0.714627	1.13554
TraesCS2A02G348800	C5	29.5869	42.2576	28.4907	22.9805	18.6883
TraesCS2B02G367200	C5	36.7097	45.6885	24.0861	21.1376	21.18
TraesCS2D02G347200	C5	36.4514	37.5716	17.2707	13.3124	12.3132
TraesCS3A02G395400	C3	0.851573	0.832814	1.22263	2.88851	2.48538
TraesCS3B02G427200	C3	0.347566	0.227523	1.46106	3.12797	2.35749
TraesCS3D02G389000	C3	1.51483	1.24081	2.32647	3.50656	3.18836
TraesCS3B02G429000	C5	9.92465	11.0237	4.16038	1.47477	2.77349
TraesCS3D02G390900	C5	0.490424	2.14477	0.0775877	0.979318	0.78796
TraesCS3A02G397500	C5	4.76787	7.03851	5.02579	4.31785	3.25931
TraesCS5B02G285500	C2	9.89464	5.42718	10.5609	10.3464	9.73566
TraesCS5D02G173500	C5	6.57265	24.3619	13.0776	11.399	14.4248
TraesCS1B02G201600	C4	0.486838	0.910835	1.28082	1.29297	1.93507
TraesCS3D02G289300	C6	1.96345	6.23226	5.30568	7.08411	5.2038
TraesCS7D02G105100	C5	1.72303	3.49077	3.00109	2.90677	1.87296
TraesCS5A02G409900	C6	0.443932	2.43355	1.64478	1.55988	1.23204
TraesCS5B02G414100	C5	2.9975	6.40521	4.84603	3.55361	3.42199
TraesCS5D02G419500	C5	1.94503	7.18246	4.6377	3.37172	2.76876
TraesCS3B02G602700	C3	0.575728	1.43084	1.71984	3.0225	3.01001
TraesCS3D02G542300	C3	0.504096	1.15904	1.25376	3.18093	3.07236
TraesCS7A02G130100	C3	0.392707	0.589474	0.932213	2.38244	2.0792
TraesCS4A02G115300	C4	45.6223	39.5485	80.933	102.57	149.974
TraesCS4D02G190200	C4	46.565	43.4028	71.6015	79.9886	104.191
TraesCS3B02G380200	C5	0.0187928	4.01314	1.37141	0.0952778	0.111868
TraesCS1B02G164000	C6	4.95868	30.5406	24.4285	20.4726	17.1091
TraesCS1D02G144400	C5	4.37563	18.3656	12.0655	9.41308	5.65223
TraesCS2A02G087100	C6	0.2426	4.57879	8.00646	7.85143	10.3045
TraesCS3A02G401900	C5	0.324238	24.8411	2.51628	1.30823	0.744784
TraesCS3A02G402000	C5	0.0465078	1.42164	0.334635	0	0.188771
TraesCS5A02G029700	C5	11.5554	13.7971	4.88386	1.9399	0.412856
TraesCS5B02G531600	C2	0.351064	2.03899	17.2241	1.11001	0.332393
TraesCS5D02G530100	C2	0.0686234	4.42844	9.89102	0.271869	0
TraesCS4A02G176400	C6	0.305396	0.990078	0.814831	1.11534	1.39464
TraesCS4B02G141400	C4	2.05523	6.89062	6.43855	10.4107	12.3488
TraesCS7A02G173000	C6	0.743485	2.20831	1.05988	2.03484	1.58816
TraesCS7B02G077800	C4	0.167473	0.56315	1.65978	4.06467	4.64073
TraesCS7D02G174100	C3	0.61105	2.41705	2.99378	4.31623	4.9312
TraesCS7D02G174300	C4	0.635791	3.3181	2.08716	4.00003	4.93186
TraesCS5B02G184900	C4	2.2292	2.12186	1.53616	3.48734	3.72363
TraesCS1A02G045800	C5	0.628374	26.4918	8.08848	10.0865	6.41015
TraesCS2D02G414900	C2	0.138944	0	4.89838	3.98726	1.55602
TraesCS5A02G353600	C2	209.296	141.471	312.784	243.231	271.897
TraesCS5D02G360900	C2	373.899	192.716	485.601	369.622	442.544
TraesCS6D02G227000	C5	0	2.19644	0	0	0
TraesCS3A02G319800	C5	3.29307	8.10506	7.25418	5.48921	4.08319
TraesCS3B02G346500	C5	4.44448	8.3772	5.4622	4.51146	3.45773
TraesCS1D02G152400	C4	1.63095	3.38857	4.45079	4.32644	5.66528
TraesCS1D02G061100	C6	2.14763	6.26623	6.47743	6.84173	5.70677
TraesCS7B02G166200	C2	1.89831	1.53925	3.43573	3.51872	2.99246
TraesCS7D02G268500	C2	1.02944	0.94663	2.30162	2.38277	2.10869
TraesCS7D02G124300	C4	10.3252	7.12955	9.6141	10.8887	12.4082
TraesCS4D02G165700	C3	6.88092	11.8112	15.7586	21.719	17.1953
TraesCS4A02G117700	C5	0.881114	3.55227	2.27819	1.64893	1.24349
TraesCS1A02G052300	C5	2.54499	19.7326	8.695	5.19975	3.71855
TraesCS1A02G105800	C5	16.6065	33.6879	10.8663	13.3621	9.00415
TraesCS1A02G105900	C5	2.63756	9.81319	2.97959	6.04889	3.56246
TraesCS1B02G069200	C5	1.9641	11.0681	4.31916	4.40632	4.34867
TraesCS1B02G128500	C3	0.2071	3.84843	1.81978	6.39853	2.78285
TraesCS1B02G128600	C5	12.5467	17.6809	8.03736	8.33614	7.94507
TraesCS1D02G054200	C5	7.37914	21.7019	8.93957	8.37628	8.28183
TraesCS1D02G109100	C5	1.13917	5.73846	2.60516	4.17767	2.60716
TraesCS1D02G109200	C5	11.045	22.2525	9.72326	8.916	6.02668
TraesCSU02G110500	C3	0.817331	0.255102	0.242606	1.44834	0.764486
TraesCS2A02G311200	C6	3.48749	89.84	44.8949	66.9328	61.5132
TraesCS6D02G302300	C6	19.0686	160.225	65.0626	100.448	127.704
TraesCS6B02G231200	C3	0	0.0779371	0.787584	4.91617	2.28779
TraesCS5B02G042800	C4	0.0569243	0.346303	0.99089	2.04942	2.75101
TraesCS1B02G273400	C5	27.4368	29.1759	23.291	26.6082	14.6031
TraesCS1D02G262800	C5	16.5699	18.8792	14.0559	15.664	8.58562
TraesCS1D02G262600	C3	3.75755	4.43374	8.9325	12.0196	8.47262
TraesCS3A02G404200	C5	7.18637	15.4382	10.8364	9.59797	5.72849
TraesCS3B02G437700	C5	5.1484	17.4182	14.2493	11.0677	6.1605
TraesCS6B02G378200	C4	3.50239	2.25205	3.30795	4.3587	5.23407
TraesCS5B02G120900	C6	2.11902	9.25169	7.44118	8.36485	7.00127
TraesCSU02G134800	C6	2.9507	14.046	10.0245	10.1838	7.86287
TraesCS5D02G486100	C5	21.2185	22.1858	22.6541	14.0563	15.947
TraesCS1A02G060500	C4	1.03195	0.775309	1.57026	1.78567	2.20141
TraesCS2A02G132500	C5	1.45449	1.9352	0.507437	1.57875	1.21353
TraesCS2D02G134500	C5	1.43946	3.89974	1.9944	3.36991	1.90787
TraesCS4D02G164000	C6	5.09335	14.4169	14.8844	18.5293	14.2425
TraesCS2A02G042000	C4	0.0442069	0.49998	1.2454	5.37809	7.61585
TraesCS2A02G042100	C3	6.097	12.6459	20.6455	22.6782	14.3075
TraesCS2B02G054600	C4	0.0634811	0.436351	0.598463	0.583662	1.05408
TraesCS2B02G144300	C4	3.4622	4.51454	7.47167	9.14111	12.3866
TraesCS5B02G010800	C5	4.18424	12.194	9.66873	4.43043	3.42177
TraesCS5D02G018000	C5	2.06856	8.42433	5.05119	2.57	1.73865
TraesCS5D02G018100	C6	0.258904	1.00432	0.610875	0.948032	0.97087
TraesCS4A02G160700	C6	7.15193	19.3071	24.5148	23.8113	28.689
TraesCS1D02G425600	C3	0.123714	0.282314	0.521257	1.54937	1.3307
TraesCS2A02G274700	C6	12.3647	126.068	81.1076	92.9615	57.5883
TraesCS2B02G292100	C5	17.4486	21.757	14.0808	13.744	12.3414
TraesCS2B02G356100	C5	0.379068	7.53606	3.78457	4.79431	2.89329
TraesCS2D02G336900	C5	4.77087	15.8038	10.8866	9.30692	7.9736
TraesCS5D02G336900	C4	0.475945	0.0533783	0.826159	5.7316	9.10669
TraesCS7A02G283700	C5	8.98547	10.5317	7.21035	7.89043	6.26698
TraesCS1A02G264400	C4	1.97643	0.551434	1.14806	1.6648	2.57015
TraesCS3A02G022800	C4	0.837285	2.57948	2.86398	4.44634	5.63955
TraesCS2A02G357600	C5	7.18944	18.9889	9.24152	11.1505	9.74726
TraesCS2D02G232700	C3	2.09796	4.99605	6.9482	7.99114	7.54565
TraesCS2D02G356400	C5	24.4274	52.9061	23.3532	28.0295	19.3293
TraesCS4B02G152300	C5	7.06377	20.4472	17.2405	13.2606	10.8999
TraesCS6A02G182600	C5	16.2285	52.9112	32.0299	25.4631	20.8569
TraesCS7D02G039300	C3	0.0159044	0	0.447024	4.2266	2.98865
TraesCS2D02G209300	C6	0.410621	2.98938	2.10453	1.39309	1.92268
TraesCS3D02G318100	C4	0.243686	0.0711427	0	0.315771	1.38145
TraesCS7A02G064300	C3	0.112237	0	0.824462	2.34898	2.29831
TraesCS3A02G326500	C6	7.13621	26.5398	25.5601	19.3632	22.6101
TraesCS2B02G492000	C4	25.8401	12.5931	24.3027	32.0253	36.2138
TraesCS2D02G469200	C4	6.8691	3.09323	8.9911	10.6101	12.286
TraesCS4A02G222400	C2	0.429875	0.940415	1.72028	1.26182	1.03264
TraesCS4B02G094100	C6	0.193843	0.969897	1.2452	1.25743	1.18974
TraesCS2A02G224900	C5	0.266561	2.52773	0.887221	0.988282	0.743078
TraesCS2B02G274900	C5	1.06951	7.49297	1.89628	2.3626	2.24297
TraesCS2A02G460000	C6	1.51382	4.4027	3.13077	4.25797	3.07529
TraesCS7B02G247700	C5	10.3171	15.5665	9.66881	10.141	7.01577
TraesCS1A02G029300	C2	11.6015	4.19633	11.905	7.9989	4.96986
TraesCS1D02G029500	C2	11.9294	7.03406	14.1685	12.7401	7.38733
TraesCS6D02G262900	C4	1.34796	0.0392993	0.683692	2.68753	3.71906
TraesCS4B02G368700	C3	0	0	0	2.79689	0.788158
TraesCS1B02G224600	C5	4.19107	5.25768	2.34721	3.0347	2.10741
TraesCS4D02G360800	C5	0	1.51714	0.298684	0.343243	0.0205602
TraesCS4D02G360900	C5	0.115548	2.0218	0.844824	0.556288	0.274945
TraesCS5A02G536600	C5	0	4.89735	2.11877	1.97283	1.12749
TraesCS5A02G098800	C6	0.592917	3.27505	2.93546	3.27854	3.28338
TraesCS5D02G110400	C3	1.91924	3.93815	5.37161	5.49375	6.44208
TraesCS4B02G320600	C4	1.65397	0.567966	0.690804	1.44064	1.54281
TraesCS2B02G355800	C6	5.17157	14.8744	12.1481	10.3789	8.18763
TraesCS2D02G481100	C3	0.158622	0.639886	0.703134	1.03966	0.869717
TraesCS4B02G219400	C5	0	1.78803	0	0	0.0715551
TraesCS7D02G345300	C5	20.4345	63.8337	41.3343	43.1208	39.1567
TraesCS4B02G190200	C4	1.19993	0.056404	0.0820255	0.754332	1.34103
TraesCS4D02G191600	C4	0.31108	0.050637	0.0246193	0.787641	1.09826
TraesCS1D02G154400	C6	0.967159	2.2453	3.50409	2.53028	3.2763
TraesCS1A02G332500	C5	103.002	111.633	126.038	78.991	84.1753
TraesCS1B02G346200	C5	118.116	163.885	124.679	73.6028	67.8531
TraesCS3A02G302400	C5	0.460964	11.668	0.413853	0.157958	0
TraesCS3B02G334200	C5	0.023477	7.54196	0.415219	0.140778	0.527609
TraesCS5D02G403000	C5	11.4892	11.3219	9.88879	7.04956	2.26107
TraesCS2A02G327900	C5	8.96226	114.794	55.3338	49.3771	40.5596
TraesCS2B02G354100	C5	7.48689	107.499	64.7292	57.3655	42.0394
TraesCS2B02G359000	C3	5.76678	39.4769	53.939	81.0095	60.0694
TraesCS2D02G335000	C5	10.3534	91.5117	50.6936	55.4753	42.8197
TraesCS6B02G225200	C5	0.389261	51.6991	33.5885	20.7242	14.9976
TraesCS6D02G190400	C6	0.271916	19.4184	14.6595	11.394	5.14298
TraesCS7A02G247700	C6	3.86501	13.2795	8.82207	9.95908	9.35494
TraesCS7B02G144100	C6	3.09855	12.0253	10.3253	11.8556	10.0447
TraesCS7D02G246300	C6	4.01829	13.9038	11.9169	12.5863	10.4869
TraesCS7D02G387300	C2	3.1498	2.02549	3.46896	3.46654	3.30407
TraesCS2A02G521600	C5	2.46152	21.1305	8.59429	11.6476	9.60097
TraesCS2B02G551100	C3	0.252058	3.35857	1.51952	4.77265	4.66398
TraesCS4A02G226500	C2	5.95901	4.57599	12.6647	12.4155	10.7437
TraesCS5B02G243200	C5	0.68355	4.07866	1.48268	1.98406	2.93645
TraesCS2B02G421100	C5	6.74816	11.2359	3.84375	3.04314	3.79767
TraesCS5D02G364900	C4	0.335708	0.0520398	0	0.356432	1.0633
TraesCS4A02G073400	C6	14.7122	43.6077	31.4227	29.5559	26.0074
TraesCS4D02G230700	C5	31.2834	58.1316	39.8202	36.5638	29.4787
TraesCS5A02G398300	C5	24.473	93.001	51.1424	49.271	53.2253
TraesCS3A02G258900	C2	0.368048	1.12097	2.328	1.62548	0.786182
TraesCS3B02G292000	C3	1.26215	3.26581	6.14106	8.16941	4.61064
TraesCS1A02G381500	C2	2.62548	4.32868	7.072	6.29826	3.07922
TraesCS1D02G389300	C2	4.8306	5.17897	5.96618	6.28186	3.25643
TraesCS3A02G024600	C5	0.842136	4.61391	1.72423	2.6608	2.78112
TraesCS1B02G135700	C5	1.8096	19.7177	6.63052	1.77051	0.947232
TraesCS3A02G234700	C4	1.03106	1.96437	2.29697	3.03172	3.5635
TraesCS5B02G194400	C5	18.3348	53.594	46.5757	34.231	27.1913
TraesCS3A02G120100	C4	0.871577	0.465246	0.9375	1.05781	1.27853
TraesCS3D02G122200	C4	0.603074	0.529742	1.26642	1.6826	1.98697
TraesCS2A02G357700	C4	7.17913	3.68139	5.05945	10.6201	13.5924
TraesCS2D02G356500	C4	6.3957	4.2171	6.35667	10.9459	13.7687
TraesCS6A02G230700	C6	1.51381	3.03045	4.46067	4.93656	3.29022
TraesCS6B02G251200	C6	0.597861	4.49811	2.81006	3.36738	2.10239
TraesCS2B02G598700	C4	0	0	0.0512687	1.31427	1.51195
TraesCS3B02G258300	C2	9.27199	6.48071	12.6983	11.9919	11.2283
TraesCS7A02G284300	C6	4.24489	16.0609	13.4913	10.8163	8.224
TraesCS7D02G282200	C6	4.48882	12.89	12.5323	11.7924	7.9377
TraesCS6A02G231400	C2	48.2869	33.4609	49.7002	41.9066	38.1589
TraesCS6B02G426100	C3	0.17295	1.31851	0.485969	1.70655	1.57929
TraesCS7B02G489800	C4	5.25725	6.23528	3.70143	5.82421	7.19381
TraesCS7D02G543800	C5	4.27964	4.75282	2.30159	4.23132	3.64829
TraesCS6D02G145600	C5	12.3326	18.6918	9.01882	12.7369	9.32367
TraesCS7D02G304600	C3	1.52481	3.87466	4.60141	7.38582	6.92402
TraesCS3A02G298500	C3	0.208812	0.302708	2.34864	3.66717	2.27736
TraesCS4B02G016300	C2	10.7858	7.63665	23.265	20.8155	24.1738
TraesCS5B02G054300	C2	1.33488	3.11147	4.88567	3.74563	3.14478
TraesCS5D02G055400	C6	2.99806	8.62166	9.64177	11	10.3692
TraesCS6A02G111700	C2	8.97027	15.3544	27.3877	2.01712	0.700884
TraesCS6B02G139800	C5	8.60524	18.3202	21.206	2.39711	0.849718
TraesCS6D02G100500	C5	10.7736	36.0878	45.3772	3.93328	2.52658
TraesCS6D02G270300	C4	28.57	17.5542	24.59	36.431	40.4292
TraesCS1B02G174500	C6	9.7605	31.3195	25.8484	21.2174	18.0999
TraesCS1A02G349000	C5	0.88316	2.87914	1.34325	1.79111	0.698266
TraesCS3A02G247400	C6	3.46873	6.07167	2.98584	5.7095	5.08838
TraesCS7A02G393100	C5	0.250256	3.57252	1.72472	1.81865	0.929505
TraesCS3A02G283900	C6	4.25044	20.2261	14.9648	15.7294	13.888
TraesCS3D02G210400	C5	2.06987	7.44221	4.19618	4.84832	3.80753
TraesCS7D02G460300	C3	0	0	0.0908068	2.9151	1.56066
TraesCS2A02G375000	C3	2.12284	5.18057	4.23741	7.74541	4.28602
TraesCS2D02G371300	C3	4.87815	5.25504	2.62255	7.40477	4.41489
TraesCS6A02G234400	C3	0.504923	0.999252	6.06245	13.7887	7.71521
TraesCS6B02G263100	C3	0.0965691	0.264333	2.26648	2.87465	2.34655
TraesCS6D02G216900	C3	0.0411079	0.0602911	0.594749	2.72253	1.70029
TraesCS1A02G373200	C3	1.04428	1.07892	4.0753	4.55052	3.55419
TraesCS1B02G393400	C3	1.15372	3.43125	3.08771	5.3965	5.18607
TraesCS1D02G380000	C4	0.666012	1.68416	1.58346	4.05966	5.35892
TraesCS2A02G036400	C5	0.780069	2.42667	1.29098	1.52977	1.3504
TraesCS7D02G342700	C6	2.41296	5.86223	7.6921	7.37952	5.54727
TraesCS2A02G336800	C4	2.14924	1.23458	1.89837	1.52138	2.30827
TraesCS5A02G199400	C6	1.44555	4.35941	6.99689	7.86466	5.11059
TraesCS6A02G325000	C6	0.357677	1.7776	1.39345	1.00347	1.42545
TraesCS4B02G051600	C5	22.766	28.0093	17.5156	15.0916	17.1859
TraesCS3A02G033000	C5	0.0252864	1.00832	0.189324	0.0630282	0.112488
TraesCS3D02G045200	C5	0.0727338	1.51415	0.524648	0.730184	0.808622
TraesCS3D02G262200	C5	1.64271	4.73322	2.50294	3.02702	2.08202
TraesCSU02G238700	C4	0.0144146	2.09708	2.09105	4.63932	5.40903
TraesCS2A02G176000	C2	1.93315	2.30038	5.17178	3.73448	1.48749
TraesCS6D02G218200	C5	1.06535	1.79214	1.09624	1.11054	0.795291
TraesCS5D02G131300	C4	1.4972	1.38073	2.57457	2.21541	3.22106
TraesCS5A02G003400	C5	1.1404	3.5236	1.47972	1.57234	1.62186
TraesCS5B02G061700	C2	5.37996	4.15573	4.89211	6.39658	3.83353
TraesCS6A02G081600	C2	0.332755	0.684358	1.36631	1.09286	1.23831
TraesCSU02G134400	C3	0.26094	0.607048	1.03138	0.980213	1.19148
TraesCS5B02G413400	C5	7.26311	8.17264	6.72866	7.62841	5.54153
TraesCS1A02G418300	C5	13.726	34.1977	20.7704	20.1353	14.3994
TraesCS1D02G426000	C5	17.9483	50.0803	26.8557	26.326	17.4684
TraesCS4D02G336100	C3	0.582453	0.532835	0.426036	5.86748	1.05062
TraesCS4D02G336300	C6	0.531975	1.81268	2.71871	2.3577	1.54491
TraesCS5A02G509400	C3	0.158658	0.517007	0.401065	12.5626	2.40838
TraesCS4B02G054400	C3	0.48728	1.11919	2.03097	2.76515	1.59775
TraesCS4D02G054500	C6	0.944257	5.26801	6.94942	6.04295	4.8618
TraesCS3A02G176600	C5	6.77929	17.8439	13.5571	9.25887	8.36773
TraesCS3B02G208100	C5	5.97336	16.2797	13.0373	10.6869	8.14201
TraesCS2B02G248900	C4	1.23772	1.54914	1.56254	1.82247	3.39798
TraesCS2A02G494300	C3	0.117163	0.289748	1.83419	3.16155	1.52468
TraesCS2A02G495100	C3	1.30383	3.80305	7.98647	10.6678	9.91123
TraesCS2A02G492400	C2	35.4072	23.8946	50.7446	42.321	44.6002
TraesCS5A02G323400	C6	6.62116	21.6136	17.5977	17.1767	15.518
TraesCS6A02G253600	C5	2.72685	3.9382	1.67391	1.48089	1.38849
TraesCS7A02G273600	C2	1.83367	1.04703	2.20149	1.68852	1.91644
TraesCS7D02G536500	C3	0.586512	0.187814	0.49531	1.22698	0.598281
TraesCS7D02G180800	C2	1.34353	0.217784	1.94145	1.1221	1.02789
TraesCS5A02G269500	C3	23.6048	16.2479	20.4394	32.2466	15.994
TraesCS5D02G277600	C5	15.5165	17.7879	14.6155	11.8742	8.01073
TraesCS7B02G443200	C5	4.44098	9.52755	5.97842	5.45446	5.61383
TraesCS1A02G437400	C4	5.73805	7.03669	8.76554	14.207	16.8539
TraesCS1B02G472000	C4	11.1355	15.669	17.0203	28.8597	36.2654
TraesCS5A02G124200	C6	1.38692	2.84824	4.6034	4.06683	3.76376
TraesCS5D02G125300	C3	0.487128	1.21581	1.36831	1.85215	1.76911
TraesCS1B02G274400	C3	0.633948	1.66882	2.10365	3.13382	2.93815
TraesCS1D02G263900	C3	0.512984	2.15398	1.82381	3.05289	3.06532
TraesCS5B02G523300	C4	10.1159	2.39865	3.08348	9.51844	10.9135
TraesCS1A02G264800	C2	4.94213	0.812799	7.66098	5.90397	5.54748
TraesCS1B02G275500	C2	1.42604	1.6638	6.55897	5.25359	6.03812
TraesCS1D02G265000	C2	2.00398	1.33955	9.57911	7.80504	6.63804
TraesCS6A02G329900	C5	0	2.35368	1.7784	0.193174	0.378127
TraesCS3B02G417900	C4	1.20225	0.870909	2.62772	2.6835	4.26422
TraesCS3D02G378800	C4	1.22189	1.27932	1.28867	1.67866	4.62244
TraesCS7D02G321400	C2	0.0423822	0.0982213	18.2959	12.8314	17.1263
TraesCS7A02G020100	C3	0.293206	1.18764	0.922101	1.80357	1.53824
TraesCS3A02G336900	C4	6.72151	2.60478	4.17576	6.91435	8.534
TraesCS3B02G368000	C4	4.71522	1.78369	5.2622	9.72238	12.8811
TraesCS3D02G329900	C4	2.69516	2.5318	5.42034	8.23466	10.8556
TraesCS4A02G127600	C4	6.43059	5.42494	0.860533	3.32029	9.73065
TraesCS4B02G177100	C4	4.60131	4.14848	2.26373	4.25805	6.90365
TraesCS4D02G178800	C4	1.07886	3.60156	0.47662	1.58451	5.07818
TraesCS4B02G305600	C5	16.4016	19.3923	7.05923	2.72671	1.44044
TraesCS4B02G305700	C5	331.514	347.305	127.49	41.6488	28.9776
TraesCS2A02G557900	C5	0.317345	1.89894	0.571337	1.39498	0.911706
TraesCS2A02G558300	C3	0.0899206	0.287909	0.414706	5.55895	3.16322
TraesCS1B02G019300	C6	0.0309756	0.598185	1.23181	0.90669	0.853587
TraesCS7D02G408100	C4	26.2187	17.6934	27.7618	31.5243	30.159
TraesCS7D02G357200	C5	1.69108	13.6644	4.13033	12.5325	3.79295
TraesCS2D02G306200	C3	2.97017	1.88324	1.7068	3.67415	2.90846
TraesCS3A02G048000	C4	1.88246	2.66526	20.3996	48.108	78.5628
TraesCS2A02G337200	C4	5.62697	6.37707	10.6	14.8407	16.2121
TraesCS2B02G344700	C3	3.97883	4.13523	9.31907	15.1269	13.2623
TraesCS2D02G325700	C4	4.06221	3.39787	4.7085	7.50844	9.47111
TraesCS6A02G295200	C2	0.729091	0.509641	3.37881	3.11317	1.66974
TraesCS6D02G275800	C2	0.78689	2.97091	9.63536	5.97287	4.95056
TraesCS6D02G149300	C3	0	0.276226	0.123014	1.3953	0.800109
TraesCS7A02G203100	C3	0	0	3.17084	40.6054	8.82141
TraesCS7D02G206400	C3	0.0973653	0.0262913	5.10438	39.4072	8.71567
TraesCS3A02G000300	C2	5.3122	1.97196	9.31824	6.168	5.61737
TraesCS3B02G003800	C2	9.74667	2.72357	12.5829	9.07358	7.49876
TraesCS6A02G291600	C5	19.5847	73.2499	17.5316	17.3387	19.7754
TraesCS6D02G272900	C5	9.60091	38.738	8.82522	10.5332	11.8288
TraesCS2D02G344100	C4	16.2801	8.8545	10.8379	15.9675	16.5083
TraesCS3B02G426000	C3	0.591459	1.19826	0.843237	3.0677	1.91974
TraesCS7A02G312600	C5	5.69957	6.66394	5.38427	5.56773	3.56087
TraesCS7D02G309000	C5	9.78201	10.4756	8.44508	7.62612	5.0826
TraesCS2A02G324000	C5	2.38872	22.8034	8.47623	6.75225	9.13251
TraesCS2B02G358100	C6	1.84625	22.0543	15.9556	12.8555	11.1348
TraesCS2D02G338900	C6	1.01481	8.08879	7.01599	7.97438	10.2833
TraesCS5B02G152500	C4	52.9227	68.6066	153.266	176.654	293.107
TraesCS7B02G120500	C4	0.31487	0.342902	1.50575	2.04464	3.19207
TraesCS7D02G041700	C5	12.3089	23.053	13.1761	19.6778	12.253
TraesCS1B02G055900	C3	2.95091	8.01794	9.32467	13.333	13.0149
TraesCS2B02G525200	C6	1.4445	5.37593	3.56921	6.57816	5.17762
TraesCS2D02G497100	C4	3.75596	11.2662	12.7502	16.5861	23.6512
TraesCS4D02G285100	C5	0.855956	1.04904	0.106789	0.275883	0.649794
TraesCS5A02G226900	C2	19.7527	18.5899	22.2513	18.873	14.4418
TraesCS5D02G234300	C5	19.185	22.0357	20.3664	17.3934	13.9281
TraesCS6B02G321100	C5	38.5116	86.0596	47.5567	50.0263	39.2447
TraesCS6D02G272000	C5	24.565	52.8544	24.3864	25.6255	21.1727
TraesCS2A02G345900	C5	0.549404	2.94239	1.92307	0.914058	1.28207
TraesCS2D02G344600	C4	0	0.894388	1.29269	5.1324	6.77383
TraesCS4B02G145200	C6	16.4523	67.6649	57.6714	65.1814	49.0256
TraesCS6A02G210700	C5	14.6297	50.9331	34.4649	28.4398	24.3351
TraesCS6D02G193800	C5	15.0042	55.9061	40.8567	26.6725	25.3002
TraesCS2D02G192800	C4	5.94104	9.02059	4.47637	8.04846	10.6382
TraesCS5A02G072300	C4	6.34092	3.13777	4.59556	5.24282	7.74249
TraesCS5B02G078600	C4	5.35066	3.89252	8.05525	9.8405	13.8135
TraesCS5D02G085100	C4	7.10406	4.57581	8.05514	11.6398	17.4521
TraesCS3D02G492500	C5	0.390341	1.99293	0.829088	0.656631	0.865402
TraesCS1A02G169500	C4	8.57545	0.0628498	1.24349	7.379	7.49522
TraesCS7A02G304700	C6	2.40649	19.5847	15.6662	14.1058	12.3949
TraesCS3A02G234900	C3	1.26787	2.03444	19.1683	30.535	13.8973
TraesCS3B02G264800	C5	8.46253	19.3806	8.6868	12.677	11.7452
TraesCS3B02G264900	C3	1.29785	2.11892	6.07547	8.77153	3.57496
TraesCS3D02G056800	C3	0	0.683307	0.369803	4.56214	3.24905
TraesCS3D02G232800	C6	2.50163	7.49321	7.16312	7.37832	6.78477
TraesCS3D02G236000	C5	0.645978	4.86344	1.66086	1.96958	1.05048
TraesCS3D02G236100	C3	0.421944	1.34749	3.21318	4.98983	1.87488
TraesCS7B02G376300	C4	0.0178411	0	0	0.785833	1.70328
TraesCSU02G067000	C4	8.77621	9.91457	13.3801	16.8413	21.7533
TraesCS3B02G250400	C5	12.4588	15.3321	11.7703	9.73959	7.44498
TraesCS3D02G232600	C5	13.5478	14.4028	11.0534	8.81352	6.47461
TraesCS7B02G008200	C6	0.898599	5.25542	3.58754	5.27816	4.2176
TraesCS5B02G186100	C5	111.727	132.857	124.613	111.09	83.3924
TraesCS5A02G341700	C6	0	1.15065	0.255045	0.904399	0.504216
TraesCS1D02G453900	C4	0.134518	0.290028	1.18359	1.24412	1.64648
TraesCS3D02G272400	C4	1.13562	0.194625	0.172015	1.40019	3.40261
TraesCS1A02G196400	C5	3.07055	3.28172	0.963386	1.45305	1.47224
TraesCS1B02G211000	C5	1.28234	3.39962	1.38674	1.15974	1.61493
TraesCS1D02G199800	C5	2.30778	2.66163	1.31663	1.27177	2.13684
TraesCS3A02G215500	C2	1.18858	0.916265	2.91939	1.92079	1.45712
TraesCS3D02G241800	C6	2.05512	6.12905	6.86734	6.69102	4.73092
TraesCS2A02G288100	C4	6.24252	4.842	8.19038	11.1398	12.5393
TraesCS2B02G304900	C4	15.2211	1.42773	8.45636	14.8228	16.3438
TraesCS2D02G286400	C4	13.6738	1.36721	7.9404	13.9064	17.2688
TraesCS1A02G420800	C5	5.43421	13.3835	7.20543	9.6491	6.89799
TraesCS1B02G452000	C5	4.29789	11.8548	7.49345	7.76258	4.99597
TraesCS3D02G294100	C4	34.0071	20.3972	23.6862	31.5556	34.1314
TraesCS3A02G132600	C3	4.4507	17.2526	28.1908	64.7142	60.4163
TraesCS7A02G346000	C4	3.06708	8.21899	20.0748	27.4712	38.9734
TraesCS7B02G237200	C4	20.7204	19.2958	15.7335	23.4789	37.2092
TraesCS1A02G329300	C4	3.3836	2.62652	4.33075	4.96981	6.58205
TraesCS2A02G169800	C4	169.552	298.085	326.794	360.369	577.407
TraesCS5A02G040500	C2	2.61022	1.69145	6.94255	5.22634	6.16818
TraesCS5B02G041700	C2	2.61467	1.48704	7.34018	6.33299	7.28347
TraesCS5D02G047600	C4	2.60126	1.01864	3.81656	5.51488	7.89831
TraesCS5A02G042600	C2	10.6476	5.60881	12.6188	12.5855	11.5124
TraesCS5A02G375500	C3	0.935053	3.38179	4.41823	7.54287	6.51152
TraesCS5B02G046200	C2	7.48298	8.50053	19.471	17.8406	18.7981
TraesCS5D02G385100	C4	2.06637	1.98666	4.88504	10.4512	10.5026
TraesCS7A02G309700	C6	1.7854	5.77094	6.13184	5.03981	6.20354
TraesCS7B02G209700	C6	1.19721	5.70035	4.83674	4.04729	4.59049
TraesCS3A02G105000	C6	4.43564	12.3053	14.7254	15.1512	11.7127
TraesCS3B02G123500	C6	6.41616	17.5455	22.5498	22.6057	17.9734
TraesCS4B02G104600	C6	1.41436	3.91439	3.34842	3.61872	3.71605
TraesCS7A02G310200	C2	3.35993	2.64428	3.27698	3.97096	2.24785
TraesCS6A02G171400	C6	0.260972	1.51994	1.3033	1.18834	0.857312
TraesCS6B02G199600	C6	0.450723	3.549	2.2167	2.12888	1.86848
TraesCS2A02G229600	C2	0.205049	0.0941701	7.84221	6.87285	6.22726
TraesCS2B02G251300	C3	1.05424	0.688261	4.14595	5.69116	5.31039
TraesCS2D02G233500	C2	0.275448	0.276168	11.4663	5.16026	6.65636
TraesCS6A02G156600	C4	0.371228	3.14664	6.54733	7.35862	12.7218
TraesCS6D02G146600	C4	0.501691	4.29972	10.2029	19.7594	28.8137
TraesCS7A02G479100	C4	0.177608	2.67256	3.99542	6.6274	9.71376
TraesCS7B02G381500	C4	1.10596	4.98941	12.702	13.3378	17.7129
TraesCS7D02G466400	C4	0.138367	3.38165	8.4466	10.7003	14.9512
TraesCS2B02G228100	C4	0.61655	0.438823	1.37318	0.492031	2.78494
TraesCS4A02G294500	C3	2.00762	6.67539	5.94401	10.7815	8.33998
TraesCS1D02G009500	C5	0	1.4412	0.0391573	0	0.0547893
TraesCS6D02G245700	C5	1.60019	1.59916	1.56646	1.45125	0.659958
TraesCS1D02G202300	C5	1.76626	4.61343	1.51309	1.57607	1.11776
TraesCS5D02G143100	C5	0.0170671	1.02023	0.466267	0.101179	0.191789
TraesCS7A02G298400	C6	9.21369	36.2059	29.8703	23.1328	20.6142
TraesCS6A02G370600	C3	3.90639	2.79848	2.83015	5.08084	3.64243
TraesCS1B02G066400	C3	4.03102	10.2963	5.30207	20.5881	9.70591
TraesCS1D02G052200	C3	0.19654	2.609	8.12228	25.3836	15.944
TraesCS4B02G225100	C2	11.0733	10.885	15.1575	8.88673	8.19484
TraesCS1D02G178600	C5	2.28422	3.42837	3.30419	2.57156	1.80154
TraesCS2D02G386900	C4	0.936222	0.328512	0.476466	0.732325	1.93226
TraesCS6A02G240100	C5	1.70491	2.10367	0.488291	0.938204	0.272982
TraesCS6B02G284500	C5	0.924894	2.32347	0.662045	1.41376	0.493247
TraesCS3B02G419800	C3	0.0162267	0.0350088	0.0424839	1.00768	0.76648
TraesCS1B02G333500	C4	0.705651	1.71116	2.33845	2.97494	4.43951
TraesCS1B02G410900	C6	0.200801	1.614	1.18752	1.68092	1.55719
TraesCS1B02G411400	C4	2.17417	5.63728	6.53184	8.07892	9.93926
TraesCS1B02G442700	C4	0.0745974	1.05147	1.19365	2.58725	3.14643
TraesCS1D02G321000	C4	2.28981	2.22044	2.5773	3.95179	6.22204
TraesCS2A02G050700	C4	2.25294	3.07137	4.32133	6.00968	9.90532
TraesCS2D02G078200	C4	1.38199	3.49419	4.87431	7.42225	9.72631
TraesCS3B02G026500	C6	0.224541	1.45161	1.68463	1.28239	1.14673
TraesCS3D02G027100	C2	0.141582	0.5983	5.08192	2.37269	1.37029
TraesCS4A02G013800	C3	0.281453	0.278264	1.26858	1.75999	1.47022
TraesCS4D02G289000	C3	0.454898	0.30028	1.78297	2.02043	1.82832
TraesCS7A02G320500	C4	47.1479	39.6046	80.5486	126.827	186.939
TraesCS4B02G088800	C3	3.06475	6.48103	10.1183	11.5087	7.16163
TraesCS1D02G396800	C2	1.28444	5.65078	12.3174	6.50619	5.70247
TraesCS5B02G292000	C6	0.258326	2.21153	2.69711	3.29019	3.11099
TraesCS3D02G374900	C5	8.87963	10.5298	6.723	8.02845	5.98831
TraesCS2A02G057600	C6	0	11.9305	9.0213	13.2369	6.84338
TraesCS2D02G057100	C3	0.0577449	0	0.300736	1.53014	1.03477
TraesCS2D02G170100	C5	1.66355	2.56134	0.743236	1.94014	1.77282
TraesCS3A02G179500	C4	2.67657	0.0997845	0.510154	1.82891	3.96254
TraesCS3D02G184400	C4	5.51222	0.10479	0.747537	4.08729	5.99197
TraesCS2A02G341500	C4	79.3213	54.8941	67.6605	86.8985	99.5884
TraesCS2B02G339200	C4	70.9459	50.2179	79.9398	108.281	132.761
TraesCS3A02G049600	C5	0	6.75897	1.24202	0.162943	0.0167214
TraesCS2D02G168500	C6	0.270202	1.50678	2.33157	1.9554	2.26248
TraesCS4A02G124000	C6	13.3458	43.0489	44.6492	29.7297	26.7904
TraesCS4B02G180400	C6	10.9218	32.0544	31.3907	21.7733	19.1568
TraesCS4D02G181900	C6	12.4183	37.6544	35.6462	24.469	19.3669
TraesCS1B02G185100	C6	7.12559	19.8058	10.9712	16.3713	18.4346
TraesCS6A02G119100	C6	8.96017	104.342	80.4813	65.8766	67.6437
TraesCS6D02G102100	C3	0.0489173	0.812306	1.35781	1.98858	2.36665
TraesCS2A02G404700	C5	3.89742	8.49004	2.61597	4.00588	2.53382
TraesCS2D02G401600	C5	8.4406	8.25281	10.1054	5.0579	2.22933
TraesCS2D02G211200	C2	1.49577	2.12816	8.15951	8.45308	5.67128
TraesCS2B02G444700	C6	9.26671	27.9542	20.3787	18.7659	22.7406
TraesCS5D02G128800	C5	5.08374	6.89115	3.60889	3.53554	2.25347
TraesCS3B02G418000	C4	20.5745	0.257797	7.83099	16.8468	19.447
TraesCS3D02G378900	C4	27.8421	0.224771	17.2489	28.3824	25.0187
TraesCS2D02G199400	C5	3.86038	5.98498	3.91117	3.95627	2.94986
TraesCS5A02G237300	C4	3.37755	1.57874	3.33036	3.2693	3.93652
TraesCS1B02G465400	C6	1.58438	4.52215	5.42488	4.14937	3.81562
TraesCS1D02G439800	C6	1.61937	4.30999	6.16533	5.25895	4.82767
TraesCS2A02G302900	C3	8.71587	33.1159	33.9481	58.5339	43.5825
TraesCS2B02G319600	C3	5.13436	16.8188	13.4163	28.6096	21.4752
TraesCS5D02G064300	C5	0	3.08485	0.0341149	0	0.0341786
TraesCS2D02G315100	C2	5.85335	6.16101	13.4433	13.2456	12.66
TraesCS4A02G222800	C4	6.78081	3.93958	6.48835	8.60642	9.58523
TraesCS1B02G095600	C5	20.8874	21.4204	19.3955	14.4461	16.5788
TraesCS5A02G324400	C6	3.90453	8.98084	10.8429	10.9661	14.1008
TraesCS5B02G325200	C6	1.63312	3.73064	4.0991	4.80171	5.38358
TraesCS5D02G331300	C6	3.36661	11.138	10.2368	11.3363	12.7887
TraesCS4A02G044900	C5	2.57238	7.83983	5.18945	4.06786	3.84643
TraesCS2A02G183900	C5	82.1428	192.349	102.89	93.4664	96.1726
TraesCS2B02G210600	C5	111.048	232.898	105.543	86.42	101.255
TraesCS2B02G600800	C4	7.54675	3.58113	4.3297	8.55649	9.93899
TraesCS2D02G191800	C5	134.119	237.428	131.817	133.746	139.287
TraesCS3A02G301200	C5	7.7791	625.988	187.987	109.561	58.1203
TraesCS3B02G335300	C5	0.707401	595.707	189.682	100.375	55.0918
TraesCS3D02G300600	C5	1.41167	658.271	159.4	90.678	59.9432
TraesCS4A02G452600	C4	0.959206	0.105961	0.0574543	0.38579	1.22682
TraesCS7A02G036100	C4	0.509587	0.299717	1.01726	1.29778	2.81457
TraesCS6A02G252600	C2	6.2217	7.32944	18.9102	8.67178	7.62869
TraesCS5A02G226400	C5	3.39973	172.811	52.8084	54.4036	37.7242
TraesCS5D02G233700	C5	4.27442	205.663	84.7026	76.3556	46.7267
TraesCS5D02G233800	C5	0.805074	1.28737	0.100889	0.758284	0.282523
TraesCS6A02G320700	C4	0.0186625	4.04197	1.8036	6.96341	12.943
TraesCS4D02G111100	C3	1.24211	1.34369	9.30594	10.7859	10.194
TraesCS5D02G411700	C4	34.0416	26.443	40.3247	52.7894	62.9931
TraesCS3A02G144700	C5	1.11206	13.6408	6.1002	7.90443	5.07491
TraesCS3B02G171500	C5	1.76099	21.9113	6.97564	8.22521	6.21426
TraesCS3D02G106200	C5	2.80091	4.48333	2.56085	2.84366	1.82688
TraesCS3D02G153500	C6	2.01355	7.59107	5.01201	5.98208	4.43183
TraesCS2D02G358200	C5	1.4038	3.62711	0.454041	0.428813	0.464259
TraesCS5A02G397200	C4	0.183314	0.486882	6.00195	6.16414	8.16739
TraesCS5B02G402200	C4	0.254573	0.81863	7.06667	7.80654	9.60791
TraesCS5D02G406900	C2	0.261051	1.18235	10.4834	9.33343	10.3827
TraesCS4B02G079000	C3	0.32323	0.343228	0.131042	1.64994	1.42957
TraesCS6A02G228400	C4	2.58269	1.65467	3.27515	4.78153	4.73919
TraesCS5D02G142300	C3	0.0357873	0.258398	0.162218	1.89375	0.713328
TraesCS4A02G007100	C4	9.57371	12.1021	12.8812	23.3001	27.9557
TraesCS4B02G297900	C3	6.35541	11.4396	16.9296	23.5265	22.8993
TraesCS4D02G296700	C4	4.79484	10.3746	11.2229	18.0372	22.1553
TraesCS1A02G087100	C3	1.42296	0.560885	1.5298	3.28319	2.03294
TraesCS6D02G127500	C5	2.60194	15.7235	6.86702	6.69633	4.78151
TraesCS2D02G225800	C5	24.797	67.8666	43.6792	39.6076	26.2432
TraesCS3A02G072000	C6	3.26453	20.4167	16.5284	12.4316	12.8481
TraesCS3B02G502600	C6	0.159991	1.68849	1.56397	1.35853	1.38092
TraesCS6A02G113500	C4	1.59662	2.66716	3.80055	4.22768	4.98456
TraesCS6A02G113600	C6	0.432197	2.51789	2.64386	2.34763	3.65355
TraesCS6B02G140500	C3	0.836104	1.78861	2.15424	2.72374	2.83718
TraesCS6B02G140800	C3	0.0350903	0.615924	1.23467	2.45454	2.12267
TraesCS6D02G076000	C4	0.119744	0.181676	0.64168	0.833922	2.03444
TraesCS6D02G101700	C6	0.387074	2.03902	3.04881	2.95022	3.57636
TraesCS6D02G101900	C6	0.24779	1.37471	1.9794	2.11395	2.29197
TraesCS5A02G509000	C4	3.38008	0.688443	0.659013	3.79504	5.87905
TraesCS2B02G539400	C3	0.473546	1.87182	1.78008	2.76997	2.81792
TraesCS4D02G289400	C6	2.70324	7.95308	9.15129	10.4254	9.37057
TraesCS2A02G345800	C6	1.89082	5.71297	5.97143	3.51707	3.00246
TraesCS2D02G344500	C2	3.25007	6.2645	8.73778	6.56466	4.27042
TraesCS7A02G291800	C4	1.08069	2.99348	3.51129	3.99272	5.12608
TraesCS5A02G010800	C5	0.957966	10.3578	2.30511	0.840452	0.696089
TraesCS5B02G008600	C5	0.0567442	4.60261	1.02309	0.779623	0.365001
TraesCS5D02G015600	C5	0.922175	12.7687	2.77674	2.11649	1.30772
TraesCS3A02G107500	C5	28.9696	72.6027	45.2138	47.186	30.4985
TraesCS3B02G330900	C4	0.844818	0.859423	1.73855	4.12692	4.74587
TraesCS4B02G035600	C3	1.7205	2.96247	1.45281	3.3378	2.40276
TraesCS6A02G179300	C5	16.3804	30.9236	31.0124	24.5733	16.6793
TraesCS2D02G370300	C6	0.890567	2.02135	2.99002	2.51299	2.70277
TraesCS5D02G494400	C6	0.465664	1.29238	1.43231	0.939109	0.574829
TraesCS2A02G591700	C3	0.0619912	0.699273	0.942566	1.76481	0.888604
TraesCS2B02G592000	C4	3.28053	2.65178	2.57739	5.11306	6.17419
TraesCS2D02G562500	C3	0.297351	2.73371	1.28304	4.81301	3.14133
TraesCS3A02G415300	C5	18.1563	28.1747	23.8492	26.8913	14.1535
TraesCS3B02G450500	C5	14.0648	47.822	26.9599	40.6709	19.3431
TraesCS3D02G411100	C5	28.6201	63.5025	46.6808	61.5593	30.3808
TraesCS1A02G427600	C4	1.003	0.770701	0.368336	0.966786	1.2444
TraesCS1B02G462500	C4	1.30656	1.51091	1.98276	3.41169	4.05386
TraesCS1D02G437300	C4	2.24028	1.87823	2.73361	4.25891	5.31221
TraesCS2D02G343900	C4	4.46479	2.09816	5.81509	7.89342	7.71029
TraesCS1D02G151600	C2	5.12601	2.84291	5.98061	5.30946	4.41015
TraesCS6D02G031300	C3	1.29306	3.4562	5.87289	9.01198	6.99187
TraesCS7D02G263000	C6	3.59664	9.42858	11.865	12.1677	13.3414
TraesCS1D02G121400	C3	0.742765	1.07783	2.35232	4.42129	2.46086
TraesCS7D02G011600	C5	20.8796	44.0879	23.0653	22.1269	14.6563
TraesCS1D02G138000	C6	1.72225	4.91841	5.76508	6.15433	6.79129
TraesCS4D02G272400	C6	5.02443	11.3088	14.4652	10.262	7.55268
TraesCS5D02G094000	C4	1.93424	0.639529	1.41594	2.59034	4.71469
TraesCS5B02G110400	C3	0.0266607	0.11484	0.540418	1.18482	0.722353
TraesCS1A02G251100	C6	4.03314	13.1732	10.767	15.8637	9.11489
TraesCS1D02G250700	C6	2.05302	8.06524	7.30206	11.6248	6.00127
TraesCS1D02G249000	C3	3.21493	1.56488	1.86213	5.67393	2.08935
TraesCS4D02G282200	C6	1.10992	2.91626	3.24048	3.53708	3.54145
TraesCS2A02G184700	C5	17.7577	23.6569	7.69051	11.2144	11.4457
TraesCS2B02G222700	C5	25.7697	34.1347	8.6307	11.4436	11.7153
TraesCS2D02G203000	C5	19.0159	50.4247	19.392	31.0226	27.81
TraesCS3D02G192700	C2	0.829974	0.298293	1.30984	0.9748	0.730842
TraesCS1A02G175600	C6	1.05276	3.98373	4.5132	3.20114	3.57857
TraesCS1D02G163700	C6	0.737063	2.77736	3.52937	1.83053	2.17789
TraesCS7A02G236400	C3	0.350908	0.359519	0.560373	1.26637	0.885647
TraesCS5D02G174400	C5	18.5703	30.1595	18.1937	25.1408	15.6193
TraesCS7A02G154800	C4	2.63093	4.12407	6.7455	8.41721	11.0607
TraesCS6A02G139600	C4	1.67383	2.82755	4.81514	5.5731	10.0187
TraesCS6B02G168100	C4	1.58708	1.12328	2.47262	2.21038	4.48137
TraesCS6D02G129700	C4	2.09975	1.69972	2.07704	2.78971	4.33148
TraesCS2A02G418300	C6	0.24755	4.9676	2.71765	3.54495	2.49303
TraesCS2B02G437200	C6	0.277522	1.11089	0.640419	0.849411	0.643755
TraesCS2B02G437300	C6	0.947189	8.75761	8.24707	9.19169	6.66355
TraesCS2D02G415600	C5	0.413492	2.51989	1.55517	1.31786	1.09005
TraesCS2D02G415700	C5	0.237741	4.72808	1.16211	2.53881	2.36784
TraesCS3B02G459100	C3	0	1.50874	1.02977	2.36794	1.29736
TraesCS4B02G187600	C2	10.4355	10.338	12.8618	7.08101	8.74123
TraesCS5A02G089000	C6	0.646387	2.38281	2.62474	2.9524	2.50928
TraesCS5D02G538400	C5	6.01291	10.3922	3.69696	4.03333	7.18576
TraesCS4A02G107100	C2	4.67674	99.5527	141.915	16.9401	8.40369
TraesCS4B02G197300	C2	4.10921	3.66137	6.10166	2.38035	2.3688
TraesCS4D02G197700	C2	0.172075	5.14462	22.4099	7.44477	5.45776
TraesCS2B02G333800	C4	3.46629	1.76908	2.86687	3.86615	3.71549
TraesCS3D02G222900	C6	0.868436	2.53311	2.13583	1.6923	1.59575
TraesCS1B02G151500	C5	1.60624	2.14919	2.12117	2.18561	0.656507
TraesCS7B02G144400	C5	4.75191	13.3507	8.1867	9.07398	6.80845
TraesCS7B02G346500	C5	33.6022	40.5804	20.2668	13.1534	8.93922
TraesCS4D02G224200	C6	1.80413	4.32351	5.37517	5.54108	5.63611
TraesCS7A02G063700	C5	3.11827	16.2378	9.27805	5.94206	5.7687
TraesCS2A02G369800	C3	2.64739	0.531473	0.764379	3.43814	1.9427
TraesCS2D02G365600	C6	0.339655	1.03191	1.00285	0.913949	1.52323
TraesCS7D02G325000	C3	0.0398776	0.0150004	0.0811042	2.90835	2.02086
TraesCS2B02G385900	C2	0.411363	1.51757	4.85823	3.85354	3.90245
TraesCS2B02G607200	C3	7.09101	3.74392	5.54497	8.48324	6.02364
TraesCS4B02G126100	C6	1.54392	4.59482	5.52961	6.79639	4.76644
TraesCS6D02G275300	C3	1.44248	3.69154	5.00556	6.42875	5.60814
TraesCS7A02G280000	C4	0.0614948	0.860898	0.603171	0.992545	1.70865
TraesCS5A02G122200	C6	4.19752	16.1969	18.4676	10.7043	8.04985
TraesCS5D02G130600	C6	2.79296	12.8155	13.1192	8.2061	5.41788
TraesCS7A02G024600	C6	0.866852	4.65976	2.01388	2.55306	3.65841
TraesCS7D02G022600	C5	0.551014	8.30275	1.26147	1.53328	1.90628
TraesCS4D02G314500	C6	7.49824	23.6319	21.3427	18.4493	18.5771
TraesCS5A02G494100	C6	11.3223	33.8539	32.3942	24.6769	26.3935
TraesCS3A02G151300	C2	1.35374	4.95317	14.3824	3.74992	1.31554
TraesCS3B02G178200	C2	4.66876	6.56011	27.5444	5.4254	2.48273
TraesCS3D02G159200	C2	15.4344	41.6457	76.9671	33.5599	24.4212
TraesCS7A02G344200	C2	3.89948	3.31256	9.33247	7.16503	7.25388
TraesCS7D02G335400	C4	3.28005	2.3538	4.25977	5.18232	5.27726
TraesCS3A02G148400	C2	7.02174	7.17833	8.29076	5.46934	5.80453
TraesCS3D02G156100	C2	4.34795	2.94317	5.97154	4.67077	5.80151
TraesCS1A02G410800	C5	3.99255	4.50061	3.28053	2.76865	3.15896
TraesCS4A02G428800	C3	0	0.0490772	0.0595562	1.436	1.20836
TraesCS4B02G358200	C4	3.20171	0.437079	2.81545	6.24614	6.82212
TraesCS5A02G527300	C4	9.11899	0.427525	7.20513	11.066	15.5435
TraesCS5A02G527400	C4	5.91407	1.9778	9.14802	12.6379	13.4938
TraesCS2A02G402000	C5	0.851325	1.3358	0.322252	0.801559	1.17537
TraesCS2B02G420100	C5	1.76771	3.25348	0.990409	1.50667	1.80991
TraesCS4B02G399200	C5	1.66788	7.13618	3.25317	4.22668	2.75329
TraesCSU02G115200	C3	0.115978	0.48704	2.13415	3.95371	3.52589
TraesCS5A02G040100	C5	0.92574	2.89911	1.75078	1.57307	0.876411
TraesCS1B02G254500	C2	2.32997	3.19417	4.45121	1.41886	0.953653
TraesCS1D02G243000	C5	3.62179	7.08894	7.2854	2.95553	1.6422
TraesCS6B02G247500	C6	2.23194	6.36682	8.40918	8.5402	6.6144
TraesCS6D02G200200	C6	1.66023	6.53431	6.29263	6.26079	4.68156
TraesCS2B02G412100	C4	0.311156	0.19198	0.752614	1.87848	4.53723
TraesCS4A02G269800	C6	1.03153	51.6516	21.7499	28.8438	30.8056
TraesCS4B02G044300	C6	4.34522	33.0173	24.5806	32.5768	34.5332
TraesCS2A02G456700	C4	4.47619	0.553356	1.18612	3.91843	3.97002
TraesCS2B02G478900	C4	3.62165	1.37239	2.69537	5.94479	6.11637
TraesCS2D02G457000	C3	2.83604	1.41863	3.61321	5.79809	5.00879
TraesCS3D02G146700	C6	1.29798	3.55189	3.69119	3.58948	2.75173
TraesCS5A02G531400	C4	1.85422	1.43084	2.03539	3.30698	3.60642
TraesCS1A02G414300	C5	0.229881	1.00001	0.12928	0.378018	0.169643
TraesCS1B02G444500	C5	0.54829	1.15464	0.282699	0.225089	0.371392
TraesCS5A02G491000	C3	0.817967	3.62478	2.6725	6.04442	3.86331
TraesCS7A02G516600	C2	14.7901	15.207	17.046	16.1555	11.3681
TraesCS7B02G432900	C5	2.11526	2.23547	1.60477	1.7361	1.23445
TraesCS2A02G283300	C6	4.83182	13.6381	18.2352	12.0681	10.3615
TraesCS2B02G300400	C6	5.00908	14.7619	21.0007	15.5525	14.3651
TraesCS2D02G282000	C6	6.25519	14.3075	20.1407	14.2594	12.146
TraesCS3D02G424500	C3	1.13353	2.83992	2.58754	4.60926	3.13774
TraesCS2D02G443200	C5	1.15977	2.66876	0.422944	0.320523	0.282867
TraesCS7A02G312000	C5	0.230512	3.35645	2.48612	1.37341	0.612541
TraesCS7B02G211800	C6	0.989008	4.11383	3.29638	3.34722	2.21182
TraesCS7D02G308500	C5	0.47717	4.3632	3.70089	2.03894	1.32574
TraesCS4A02G238400	C3	0.0233973	0.211306	3.23435	5.36036	4.44199
TraesCS4D02G075000	C3	1.59982	2.45851	5.35647	7.24741	7.09698
TraesCS1A02G302600	C3	1.15377	0.986944	2.57301	4.56613	3.08739
TraesCS1D02G302000	C3	0.519625	3.67685	3.65881	6.18343	2.82758
TraesCS3A02G342000	C3	0.588334	0.284622	0.651008	1.51628	1.03858
TraesCS3D02G415800	C5	0.246855	1.14279	0.802209	0.634196	0.627276
TraesCS5B02G091700	C6	1.60202	9.31911	13.8982	12.6603	11.0943
TraesCS5D02G097900	C6	2.13258	7.86807	12.0944	11.8646	10.8505
TraesCS6D02G192300	C4	0.385126	1.17091	0.142143	0.565729	1.9143
TraesCS1A02G386500	C5	0.224015	3.62349	1.03345	1.97341	0.64215
TraesCS1B02G413900	C3	0.0160663	2.85859	2.04705	4.50038	2.34642
TraesCS6A02G288500	C3	0.418037	1.06774	1.96586	2.20365	1.68369
TraesCS5D02G259600	C6	0.468515	1.90969	1.9805	1.72678	2.03208
TraesCS2B02G271100	C6	1.84918	4.75112	5.20022	5.59366	5.73783
TraesCS5D02G083600	C5	3.71908	3.84335	2.73471	4.15887	3.32629
TraesCS6A02G217000	C5	0.411604	2.99887	2.08622	0.76507	1.71886
TraesCS6D02G198500	C6	0.703694	4.41726	2.92561	5.85735	4.75613
TraesCS5D02G308100	C4	0.695699	0.920382	0.709302	0.863397	1.52505
TraesCS1A02G094000	C6	4.02195	11.7478	8.94567	9.29185	6.39328
TraesCS1B02G122100	C6	2.37717	7.12634	6.49635	5.81033	4.7774
TraesCS1B02G374000	C4	0.578359	0.597153	0.68803	1.76214	1.99488
TraesCS5B02G376000	C6	2.99394	10.6021	7.50208	6.45681	7.72071
TraesCS5D02G383600	C6	1.3613	6.19791	4.34034	3.21511	5.24361
TraesCS4A02G272200	C6	3.97864	13.6107	9.35631	9.77613	8.15627
TraesCS4B02G041800	C6	4.38146	18.2386	10.6461	12.7179	10.3672
TraesCS4D02G039000	C6	3.18852	13.1351	7.96995	9.3045	7.15399
TraesCS1B02G279500	C4	8.8179	7.59355	13.6091	13.6921	22.1831
TraesCS1B02G411900	C5	0.333489	1.34114	0.556043	1.09726	0.574927
TraesCS1D02G393500	C5	0.425163	1.5734	0.66968	0.946592	0.368239
TraesCS5B02G158700	C5	4.30647	9.55403	8.4872	7.26581	4.73612
TraesCS5B02G032700	C2	8.01881	2.69665	10.2117	5.96744	6.49028
TraesCS2D02G128100	C4	0.432549	0.805383	1.32921	1.54679	1.93207
TraesCS6A02G264600	C4	7.41684	5.26535	4.29071	5.81206	7.86786
TraesCS6D02G250300	C4	15.2693	15.1779	9.72212	12.9389	18.575
TraesCS1A02G422600	C6	0	2.19565	1.29361	2.80651	2.15566
TraesCS1D02G431000	C6	0	2.18805	1.35521	2.95244	1.84067
TraesCS1D02G431400	C5	0	1.87683	0.57754	0.884322	0.489445
TraesCS2A02G216600	C6	0.212741	2.90131	2.87302	2.89463	3.42604
TraesCS2B02G241400	C6	0.0307731	3.87826	3.70594	4.27045	2.47094
TraesCS2B02G241900	C5	0.0862069	4.42623	1.78012	1.74122	1.23141
TraesCS2B02G196000	C3	0	0.0360095	0.756216	4.45302	2.76268
TraesCS5B02G210600	C5	8.55479	17.9115	9.6208	7.39796	6.48788
TraesCS5D02G218800	C5	9.3598	23.7773	14.0627	13.2028	10.3968
TraesCS1A02G195300	C6	4.90751	11.7432	16.4262	12.0784	8.65012
TraesCS4A02G012800	C4	6.24975	7.44458	6.49833	9.68774	14.7905
TraesCS4B02G291500	C6	2.10507	13.07	11.2429	14.6384	20.6493
TraesCS4D02G290100	C6	1.45488	9.57748	6.17216	5.88886	9.99157
TraesCS3D02G253100	C6	0.769158	3.8958	4.6104	4.56364	3.94665
TraesCS3D02G451300	C2	0.102642	0.0545302	1.27563	0.984606	0.595842
TraesCS2B02G385800	C3	1.14904	2.51963	2.49789	4.65264	4.30744
TraesCS2D02G365400	C3	1.06426	1.68307	2.63868	4.25118	3.68075
TraesCS4D02G218200	C5	1.05098	2.12305	0.85205	0.951012	1.0006
TraesCS1A02G356200	C6	1.00635	4.6923	4.93589	4.35693	3.76432
TraesCS2A02G182400	C5	4.05406	4.32874	1.86058	0.96679	0.61491
TraesCS2B02G208900	C5	0.726427	6.06019	1.61081	1.15531	0.890873
TraesCS2D02G190200	C5	4.01737	4.40488	1.47152	1.17643	0.841645
TraesCS7B02G064200	C5	11.2468	13.1102	8.08436	10.7625	9.37648
TraesCS3D02G212900	C3	0.3093	0.234928	0.869103	2.12173	1.4169
TraesCS4A02G259700	C6	1.86552	6.64132	5.20924	8.31654	5.62648
TraesCS4D02G309200	C6	1.39945	4.25256	4.61007	3.56544	2.80762
TraesCS4A02G157600	C3	1.59072	4.62406	8.44372	12.7319	9.5996
TraesCS4B02G155300	C3	1.9216	4.39944	7.77743	8.43012	7.1711
TraesCS4D02G168300	C3	3.50876	6.2995	9.60579	12.2941	12.3925
TraesCS1A02G121200	C6	0.525757	1.91229	2.57155	2.03556	1.88
TraesCS5B02G032900	C6	1.63016	6.11241	4.45852	4.42154	4.12997
TraesCS2A02G163300	C4	2.05073	2.29847	2.78024	4.75174	6.51717
TraesCS2B02G189100	C4	0.42586	0.319792	0.635812	1.54917	1.93792
TraesCS4A02G406400	C5	0.608319	1.85645	0.196029	0.0124263	0.045148
TraesCS4D02G304100	C5	0.897494	1.73849	0.189071	0.0118091	0
TraesCS7D02G125400	C5	1.5293	5.59943	0.71316	0.0777809	0.0198834
TraesCS2A02G351300	C6	1.5465	14.401	10.7918	10.4528	4.39752
TraesCS2B02G369400	C5	7.23213	28.6097	19.6506	17.069	9.80078
TraesCS5D02G170800	C5	8.50835	11.8237	11.2468	9.0346	6.15889
TraesCS2B02G470800	C3	0.630623	1.35143	2.68034	3.28192	3.04632
TraesCS7A02G441800	C4	0.131317	0.672782	0.82171	1.01681	1.38806
TraesCS7D02G431000	C3	0.456812	0.913032	1.185	1.4994	1.60985
TraesCS5A02G096400	C6	3.46638	13.1486	13.3909	9.38247	9.44641
TraesCS5B02G102300	C6	4.67265	14.8815	17.9271	12.6047	11.2616
TraesCS5A02G446300	C6	7.66096	22.1983	16.5186	16.4359	16.2473
TraesCS1A02G304200	C3	0.170631	0.695951	0.642492	2.49394	1.7774
TraesCS1B02G314700	C4	0.176992	0.149499	0.324643	1.18191	1.28638
TraesCS1D02G303700	C4	0.391067	0.511695	0.376123	1.15206	1.47454
TraesCS2A02G431100	C6	0.173985	1.87116	2.33951	1.61649	1.04948
TraesCS2D02G428900	C6	0.424445	2.34729	2.71833	2.44864	1.73117
TraesCS7B02G137400	C4	2.48325	3.57729	6.98918	6.58749	7.86584
TraesCS6B02G386100	C2	0.410062	0.755942	1.47279	0.685835	0.496257
TraesCS6D02G335800	C6	0.828059	1.98657	2.03019	1.84126	2.60447
TraesCS1B02G147100	C6	0.258005	1.58481	1.85979	2.33439	1.94947
TraesCS2A02G351600	C2	0.182441	0.0447666	40.6968	38.3297	40.1441
TraesCS2B02G369800	C6	0.0368708	2.19222	1.37165	2.25883	1.59405
TraesCS2D02G349800	C2	0.487583	0.0453775	20.8587	19.5209	14.2647
TraesCS6D02G204700	C6	3.24566	8.99423	9.88079	10.2449	9.69997
TraesCS2A02G357400	C4	2.9815	1.5173	3.9424	4.24214	4.91543
TraesCS2D02G356200	C5	4.84042	8.44277	5.68733	5.07291	4.33423
TraesCS7A02G141500	C6	1.63266	3.60234	5.7273	4.22626	4.9046
TraesCS7B02G043200	C2	2.02791	9.30659	30.869	23.5661	17.1641
TraesCS7D02G142800	C6	1.31739	5.12562	5.01918	5.89507	5.45919
TraesCS7D02G143600	C2	0.766328	5.18491	12.9334	7.47422	4.70541
TraesCS7A02G146100	C6	2.15081	9.29733	6.3005	6.20401	9.30422
TraesCS7B02G048600	C4	2.75355	3.1614	1.71407	3.53257	5.0874
TraesCS1A02G401900	C5	1.52147	1.72964	0.786437	1.17523	1.32069
TraesCS1A02G226100	C6	1.09677	3.2584	3.49676	3.40214	5.04571
TraesCS1B02G240200	C6	0.900543	2.67229	2.77703	3.01529	3.7881
TraesCS1D02G227500	C6	0.415948	1.7394	1.72352	1.64916	1.77985
TraesCS4B02G216100	C5	3.27175	4.28323	2.40879	3.25465	2.3061
TraesCS2B02G287900	C3	1.72844	2.92887	4.64783	5.62888	4.20678
TraesCS2D02G268100	C3	1.85024	3.73812	5.60675	6.57463	4.10614
TraesCS7A02G558100	C6	2.38938	7.15992	9.54131	9.09929	11.4686
TraesCS7D02G551500	C6	2.00213	11.833	12.6012	10.8584	10.1501
TraesCS4D02G343800	C3	3.02847	1.72682	9.368	12.4113	11.481
TraesCS4A02G052400	C5	2.54157	5.40223	5.94095	2.17021	1.66098
TraesCS1D02G195700	C5	22.4561	36.0182	26.9686	17.906	22.3786
TraesCS3A02G496100	C5	0	1.35438	0.458679	0.224231	0.153926
TraesCS1B02G158900	C5	5.55522	13.1382	9.0258	7.59032	7.01092
TraesCS1D02G141700	C5	8.84499	9.37406	9.74164	7.45503	6.73644
TraesCS7A02G333700	C5	48.534	215.688	128.73	118.511	112.524
TraesCS5D02G169100	C2	1.11867	1.78607	2.69731	1.09489	0.780551
TraesCS7A02G388700	C3	0	0	0.0179298	3.2651	0.566864
TraesCS7D02G384600	C3	0.016304	0	0.0847174	1.35092	0.254335
TraesCS4A02G044300	C6	2.92826	8.8446	9.56715	9.86226	11.1107
TraesCS3B02G172600	C6	0.530378	1.7524	2.60038	2.25206	2.08322
TraesCS2D02G182600	C3	0.303848	1.12112	1.57938	2.51804	2.73954
TraesCS5B02G163100	C5	1.78762	2.82706	1.91388	1.46305	2.43676
TraesCS5D02G170300	C5	2.47588	4.10719	2.85985	2.23719	3.25473
TraesCS4B02G107800	C5	15.1484	75.3219	39.2151	34.4687	27.4753
TraesCS4A02G311000	C2	0.0339117	0.416803	1.50393	0.438881	0.361977
TraesCS5A02G027200	C4	4.42737	2.81351	4.03077	6.35354	6.03351
TraesCS5B02G026400	C4	2.90013	1.77903	2.67018	3.7188	4.33957
TraesCS7B02G436700	C5	21.7155	129.764	23.7733	13.594	20.2314
TraesCS6A02G145200	C4	0.393082	0.201532	10.4118	11.1066	12.9685
TraesCS6B02G173400	C2	0.197099	0.0523232	12.2259	10.1575	12.3676
TraesCS6D02G134200	C4	0.165899	0	2.17192	3.34752	5.43912
TraesCS7A02G143800	C5	1.5578	4.69426	3.33801	2.35916	2.50627
TraesCSU02G026800	C5	0.22994	1.61524	0.934921	0.510464	0.149433
TraesCS1A02G129200	C6	4.85701	14.7318	10.8101	10.786	7.97063
TraesCS5A02G072900	C5	3.55762	4.35961	3.30071	2.70405	2.63024
TraesCS5B02G079000	C5	2.43274	2.72453	2.84023	1.80762	2.31676
TraesCS5D02G115900	C4	11.3795	3.82087	12.456	14.6489	20.6685
TraesCS7A02G443100	C4	4.09989	3.35703	2.32466	3.75155	4.65549
TraesCS2B02G542200	C6	4.37452	25.6668	38.5253	36.5649	24.8177
TraesCS2D02G336100	C4	0.709614	1.38841	2.51626	2.10554	3.12242
TraesCS3A02G323600	C5	1.02638	2.97246	1.49053	1.43943	1.93231
TraesCS1A02G158700	C6	7.91261	35.3245	40.9808	34.3077	23.0169
TraesCS1D02G156000	C6	8.5561	32.6476	39.7063	33.3687	23.1122
TraesCS4A02G260900	C6	0.814298	3.79173	2.66369	2.29957	2.30609
TraesCS4D02G053700	C5	1.49014	2.18073	1.9046	1.57387	0.967731
TraesCS2B02G473600	C4	36.1504	9.06893	22.5902	42.8049	56.6631
TraesCS5A02G079500	C2	5.81776	5.22385	11.476	11.7061	11.1022
TraesCS7D02G382700	C5	86.3303	129.889	71.1418	65.1329	52.4469
TraesCS5D02G334500	C3	4.60833	6.49127	3.36294	8.74744	4.22278
TraesCS4A02G121100	C6	1.00847	3.8373	5.36117	4.80259	5.19663
TraesCS4B02G269900	C6	7.06275	24.0747	23.6464	21.4162	18.3792
TraesCS4D02G269200	C6	6.3109	19.391	23.7002	21.5324	18.673
TraesCS7D02G228000	C5	15.2321	20.4334	18.9359	19.1797	10.8441
TraesCS5B02G355100	C4	3.25047	2.24077	3.45963	3.41412	5.67902
TraesCS4D02G321800	C2	0.217745	0.146232	3.08099	0.288337	0.15017
TraesCS5A02G504500	C4	1.2257	0.0707481	0.936793	1.51365	3.29125
TraesCS7D02G153100	C3	0	0.0543623	0.0541604	4.90325	2.08301
TraesCS7B02G446100	C2	0	0.298421	2.54662	0.918337	0.647681
TraesCS7A02G385900	C6	7.59332	21.31	18.6994	19.829	20.133
TraesCS7B02G288800	C6	4.11225	16.4115	14.8363	15.1595	12.0358
TraesCS1A02G429800	C5	0	4.98946	0.625857	0.480622	0.129835
TraesCS1D02G439200	C5	1.34948	5.78503	1.18509	1.56217	1.32334
TraesCS1D02G439300	C5	2.08534	31.4247	4.91298	9.23533	5.8444
TraesCS2A02G221300	C4	4.07805	2.94626	0.398747	5.0292	10.4098
TraesCS2D02G227000	C4	0.215315	0.782042	0.297409	4.75223	7.32109
TraesCS2D02G227400	C4	0	0	0.0154377	0.817465	1.56131
TraesCS3A02G215000	C5	1.14473	29.942	7.50876	9.89225	5.19124
TraesCS3B02G246300	C6	0.722116	6.04426	3.63823	5.77667	3.12104
TraesCS3D02G218100	C6	1.0173	3.09255	1.89297	2.96816	2.4821
TraesCS4A02G318400	C5	0	1.56544	0.70965	0.935229	0.348662
TraesCS3D02G224000	C3	0.554592	2.25607	0.828614	3.74369	2.71287
TraesCS1A02G020600	C6	1.98616	5.59958	5.32592	5.68707	6.27638
TraesCS2B02G532900	C3	0.307595	0.79249	0.864206	1.26437	1.42775
TraesCS5A02G049800	C6	3.23407	18.0751	16.3326	11.4053	11.0885
TraesCS5B02G055400	C6	5.34738	24.5515	20.7506	13.6564	12.9914
TraesCS5D02G060600	C6	3.66219	18.759	17.0941	13.5253	12.7214
TraesCS1B02G150500	C6	2.74591	9.23757	10.4727	10.6003	9.52523
TraesCS1D02G131500	C6	2.68939	7.25622	8.87983	9.98307	9.5833
TraesCS4B02G145400	C6	0.774769	3.43754	3.44514	3.4434	3.09273
TraesCS4D02G150900	C6	1.00774	3.41868	4.01178	3.46236	3.36727
TraesCS7D02G444700	C6	0.0434774	2.80084	1.09029	2.33985	1.75271
TraesCS2A02G430900	C6	2.46708	16.2489	12.6303	10.9102	7.11085
TraesCS3D02G212200	C6	7.27192	19.0664	18.0837	13.2051	9.6464
TraesCS3B02G426500	C2	4.04811	9.12358	18.7691	13.8625	14.8757
TraesCS3D02G388300	C2	3.65028	8.22291	14.5068	11.2855	13.4788
TraesCS3B02G245000	C5	109.544	154.515	85.1495	80.7376	73.0638
TraesCS1A02G123200	C5	0.624592	6.92497	2.2867	1.59329	1.07934
TraesCS1B02G143500	C6	0.243285	7.72849	9.75414	7.43648	7.20762
TraesCS1D02G130900	C5	0.651845	7.85791	6.40027	2.6883	2.67635
TraesCS2A02G096300	C3	1.31633	3.96667	5.31671	6.6843	5.54447
TraesCS4B02G307900	C3	3.53157	2.57151	2.58412	4.49387	3.4019
TraesCS4D02G000400	C6	1.5363	9.45195	9.7605	9.0833	7.54012
TraesCS5D02G549500	C4	5.74002	6.40232	10.9619	14.5886	17.3866
TraesCS6B02G255800	C5	23.937	65.4083	49.0789	34.1276	29.0418
TraesCS5A02G241100	C2	5.31671	7.02838	8.27199	7.07068	4.17387
TraesCS5A02G015000	C6	251.729	1042.27	1074.39	795.138	667.595
TraesCS6B02G246400	C2	0	0.0313259	43.8719	1.7716	0.449202
TraesCS4B02G273300	C2	18.8811	33.4087	49.1769	9.71362	3.87593
TraesCS3A02G413200	C5	1.27841	8.73963	2.13429	1.49112	1.38271
TraesCS3B02G447400	C5	0.377439	217.922	25.5653	27.0382	9.4411
TraesCS3D02G407700	C5	0.376982	13.8466	1.4914	0.802818	0.598342
TraesCS2B02G400300	C5	29.7678	37.4401	28.3638	23.4936	22.278
TraesCS2D02G379400	C5	17.0063	21.4654	17.0065	13.0482	12.8475
TraesCS5A02G556500	C2	18.7272	12.3165	24.7897	22.422	24.3828
TraesCSU02G115700	C2	10.7445	2.54378	10.9105	9.99764	10.3045
TraesCS7A02G145300	C3	0.312964	1.75235	2.09339	3.55208	3.24216
TraesCS3D02G100100	C4	0	0	0.162441	1.99623	1.95288
TraesCS3D02G287800	C5	0.681437	3.017	0.436585	3.36033	0.939889
TraesCS4B02G341500	C5	2.97029	4.10885	1.0984	3.40874	1.31746
TraesCS5D02G271400	C3	1.08385	0.835985	2.51595	6.88393	5.13124
TraesCS5A02G401100	C4	2.25781	2.47712	4.57051	9.2512	20.9721
TraesCS5B02G405900	C4	5.89271	2.04878	2.58497	7.44569	15.9741
TraesCS2A02G263300	C4	214.749	210.719	209.606	320.819	428.57
TraesCS4B02G345400	C3	0.436051	3.13583	2.6333	5.18266	5.29264
TraesCS5A02G551000	C5	9.17089	10.655	7.05966	5.27861	5.72101
TraesCS5A02G547000	C3	0.50763	0	0.0245311	2.10605	1.10583
TraesCS5B02G073200	C4	1.3214	2.2605	3.69581	4.25307	4.90634
TraesCS3B02G141100	C2	16.7374	10.0258	27.8343	24.1002	27.5324
TraesCS2B02G275800	C2	0.274297	0.26997	1.02625	0.845474	1.01529
TraesCS7B02G034400	C3	0.233346	0.0949477	2.87632	4.24524	4.1661
TraesCS5A02G221100	C5	4.94383	5.21451	5.64122	4.53109	3.42276
TraesCS5A02G513600	C5	15.3925	22.8598	7.78468	7.27267	6.04849
TraesCS5A02G400200	C5	0.510265	1.6227	1.10843	1.03679	0.952448
TraesCS2A02G356200	C4	0.123595	0.276429	0.414664	0.841746	1.25822
TraesCS2B02G375500	C3	0.0142446	0.141764	0.389048	1.15158	1.02106
TraesCS2D02G355100	C4	0.0363247	0.131548	0.148229	0.86429	1.15388
TraesCS7A02G510200	C6	0.613146	3.53675	4.00512	3.93927	1.81184
TraesCS7B02G420700	C5	0.290708	25.1141	10.6695	6.39844	2.50866
TraesCS7D02G499500	C6	0.247415	4.24697	5.94035	5.7128	3.19099
TraesCS1B02G136000	C2	3.71587	1.6051	23.5322	17.5159	20.6698
TraesCS4A02G175400	C4	4.74997	3.73127	16.1718	15.5354	21.528
TraesCS4D02G140700	C4	5.91283	5.32424	21.6354	23.0162	27.36
TraesCS4A02G067700	C3	17.8067	13.2008	13.5793	21.8555	17.7896
TraesCS6D02G336200	C4	5.05735	7.64299	12.0292	13.4487	17.3585
TraesCS7A02G260300	C6	3.72012	10.7531	11.9673	10.1807	10.9889
TraesCS7B02G203800	C3	8.42921	12.5818	21.5771	28.4555	19.8042
TraesCS5A02G225800	C4	1.96058	2.14376	4.16009	4.17375	5.19403
TraesCS5D02G233100	C4	2.35377	0.827317	1.72332	1.96258	3.27617
TraesCS1A02G311000	C5	30.0464	59.8482	42.5405	43.7401	31.1946
TraesCS1B02G322400	C5	16.2135	40.3143	27.3589	26.335	18.7208
TraesCS3B02G361600	C5	9.97535	66.1772	44.4025	38.5238	26.8191
TraesCS3A02G054200	C5	7.98892	13.0128	8.97129	8.18286	6.98896
TraesCS3D02G053700	C5	5.92401	9.66521	6.94346	6.24138	4.2109
TraesCS2A02G284200	C4	16.5547	16.6873	33.0968	40.056	49.4206
TraesCS5A02G493100	C6	1.63474	6.41232	9.61346	9.6133	12.2099
TraesCS6B02G209800	C6	2.33712	6.84965	7.56344	9.16032	8.29588
TraesCS6B02G207400	C6	0.326828	1.14193	1.09604	1.47671	1.39811
TraesCS6D02G167000	C3	0.465562	1.03956	1.35398	1.88742	1.45058
TraesCS1A02G413300	C3	0.560397	2.2642	3.37965	5.36024	4.70382
TraesCS3A02G218100	C5	45.9845	50.0554	31.2997	34.6601	24.2499
TraesCS1A02G119500	C4	5.63451	23.1499	26.7074	34.9572	44.6978
TraesCS1D02G120300	C3	4.30281	10.7123	14.203	17.7218	13.4225
TraesCS3A02G119000	C5	50.5623	74.1671	47.7414	39.5267	40.9011
TraesCS3D02G120900	C5	58.9426	83.1176	52.8798	44.4077	42.9142
TraesCS3A02G275500	C4	4.26281	3.60197	4.08884	8.55498	10.4611
TraesCS5D02G218600	C5	1.98943	4.0567	3.80723	2.82282	1.69659
TraesCS6B02G167800	C4	3.9388	5.18855	9.54213	9.08074	11.4193
TraesCS5B02G025300	C5	0.817208	1.21963	0.424289	0.655064	1.06319
TraesCS5D02G034200	C5	1.38031	2.29876	0.510352	0.693182	1.35862
TraesCS5A02G137600	C4	7.24146	4.76785	6.71558	8.08264	7.5404
TraesCS3B02G220900	C4	3.5982	5.10271	3.34101	9.55221	10.9347
TraesCS3B02G364700	C5	7.15143	8.967	2.24923	1.94977	3.8694
TraesCS2B02G290300	C6	3.72076	16.0117	14.3019	14.3706	11.8355
TraesCS2D02G271400	C6	2.13627	5.91425	4.66037	4.90054	4.06608
TraesCS2D02G293800	C6	3.9106	18.6868	19.6359	22.8982	17.3376
TraesCS4A02G303400	C4	1.9249	1.60694	2.07444	3.54369	3.79095
TraesCS4A02G302100	C4	0.632997	0.559901	1.63636	1.37869	2.04429
TraesCS4D02G010300	C4	0.224663	0.259754	0.748031	0.389635	1.03669
TraesCS5B02G130100	C2	2.40763	1.54059	2.93917	2.06679	1.86624
TraesCS7A02G281000	C5	0.647799	1.2567	0.324686	0.562957	0.0453322
TraesCS7B02G180100	C5	0.354761	1.74158	0.209247	0.429977	0.159373
TraesCS7D02G279600	C5	0.152059	1.27512	0.333646	0.305852	0.144718
TraesCS5D02G453800	C4	0.0319136	0.366301	2.84011	1.96787	3.40626
TraesCS1A02G156500	C6	2.28765	4.06608	4.25164	4.41087	2.19863
TraesCS1B02G173600	C5	2.64427	6.31396	3.94304	5.5345	3.13482
TraesCS1D02G155000	C5	2.85295	6.96648	5.20062	4.94593	2.51717
TraesCS6A02G123000	C6	1.26382	3.55444	1.78819	3.11575	2.93855
TraesCS2B02G156600	C2	0.341972	0.895155	1.85775	0	0
TraesCS1A02G054400	C3	4.86121	2.5341	6.00548	8.48612	5.48517
TraesCS1D02G055200	C3	3.18133	2.60465	6.41532	7.49773	5.39668
TraesCS5D02G162500	C2	7.33233	3.73293	19.647	15.602	13.0029
TraesCS1D02G282700	C4	0.460284	0.316332	0.178604	0.591954	1.29158
TraesCS2A02G278800	C6	0.780407	2.89826	2.25964	2.69308	3.32339
TraesCS2B02G296300	C3	2.03375	4.99571	4.48616	7.3063	5.47433
TraesCS2D02G277800	C6	1.05726	5.93572	4.53114	6.73232	5.97021
TraesCS1A02G299200	C5	0.0120178	1.1229	0.156899	0	0
TraesCS3D02G475400	C6	1.28926	3.62953	4.12763	5.18644	4.55457
TraesCS1B02G206000	C3	3.95989	9.96257	12.4402	16.7159	14.1095
TraesCS4D02G017000	C5	10.2464	11.8393	6.75989	10.8092	7.13169
TraesCS3A02G291600	C5	9.69324	32.6342	24.0853	17.8918	13.5188
TraesCS3B02G326200	C6	9.02611	29.4138	26.5098	20.7596	14.5714
TraesCS3D02G291300	C5	8.55266	25.8675	19.295	15.7336	12.0806
TraesCS4D02G313100	C6	1.51035	4.33812	5.12304	4.80997	5.96615
TraesCS6A02G398000	C6	1.53613	5.45138	3.92686	3.70315	4.64012
TraesCS6B02G437800	C6	2.49509	7.2834	6.18599	5.67343	7.4903
TraesCS3A02G400600	C3	0	0.100987	0.0702997	4.31964	0.985961
TraesCS3D02G395000	C3	0.142824	0.0686786	0.285482	9.80468	2.6312
TraesCS6A02G218200	C6	0.154383	2.0844	0.791124	2.56286	1.36966
TraesCS6B02G247800	C3	0.170632	1.15523	1.16289	3.33024	1.7666
TraesCS6D02G201400	C5	0.381452	2.41059	0.922354	1.85369	1.16057
TraesCS5A02G433900	C5	2.12473	12.126	6.06443	6.79556	2.87939
TraesCS5B02G436800	C5	0.726041	35.907	7.53684	10.3722	5.94095
TraesCS5D02G441800	C5	4.19882	37.3119	8.09277	10.7525	9.16956
TraesCS5D02G100200	C3	0.456354	1.36712	0.945875	7.87455	4.47273
TraesCS2A02G360500	C2	0.906032	1.03263	4.55363	1.24772	0.725223
TraesCS7A02G395700	C5	4.67059	10.2546	1.88345	9.77827	7.13945
TraesCS7A02G395800	C3	0.383269	2.95399	3.0075	5.27374	2.39721
TraesCS7A02G396300	C2	2.4745	8.20014	11.8276	4.76908	3.10402
TraesCS7D02G391500	C5	0.143547	1.16938	0.334759	0.288484	0.245308
TraesCS6B02G344500	C4	5.58019	4.13187	3.45204	6.03078	6.40356
TraesCS6D02G321900	C6	4.25673	15.7896	16.4068	11.4376	9.45197
TraesCS3B02G305600	C5	18.6873	18.1473	17.4606	17.7167	9.51873
TraesCS2D02G251500	C5	9.82332	11.4459	5.12241	8.21227	10.4239
TraesCS2A02G222700	C2	0.0884708	0.0243317	1.1103	0.0489907	0
TraesCS1A02G411600	C5	0.521964	3.6769	0.525011	1.28016	2.28571
TraesCS1B02G441900	C6	0.721375	8.08429	6.2428	8.616	9.90394
TraesCS1D02G419400	C6	0.309194	5.47549	2.27715	4.46561	5.87579
TraesCS3B02G263100	C5	1.07909	5.64911	2.73718	0.930403	0.423713
TraesCS3D02G231000	C4	2.57446	5.92881	8.17587	10.3582	14.0391
TraesCS6B02G059300	C3	0	0.180707	0.0636086	1.23811	0.644502
TraesCS5D02G088300	C6	2.31919	7.44226	6.5322	5.82851	4.88085
TraesCS6A02G381800	C6	5.8465	16.8958	13.7628	11.7805	10.1826
TraesCS4B02G380200	C4	0.0568997	0	0.199468	1.04639	1.98771
TraesCS3A02G441500	C5	0.18526	5.67027	4.14323	3.12122	1.20475
TraesCS3B02G475400	C6	0.296828	2.44057	1.48007	1.73676	1.25446
TraesCS3D02G434300	C6	0.780259	5.93484	2.71664	4.68791	2.85749
TraesCS4D02G263800	C5	32.7637	54.363	29.4258	17.1243	10.525
TraesCS4A02G324400	C5	21.6762	55.5852	31.691	28.5254	31.4379
TraesCS6A02G201500	C4	1.41672	0.961911	2.30862	2.39993	4.16322
TraesCS6B02G219200	C4	0.445269	0.720867	0.779173	1.17868	2.41428
TraesCS7A02G279000	C2	15.8232	9.80903	30.0555	18.0589	13.4876
TraesCS4A02G304300	C5	1.15825	12.7393	2.10408	0.391278	0.345663
TraesCS4A02G304600	C5	10.0098	10.5757	5.91287	0.880153	0.517629
TraesCS4B02G006600	C5	29.872	40.6164	9.56373	5.81151	2.08354
TraesCS4D02G008500	C5	3.92409	13.294	5.12779	1.24538	0.718031
TraesCS2B02G309000	C3	0	0.269123	0.0592541	1.03856	0.493561
TraesCS4A02G257400	C5	0.478881	2.84138	1.30677	2.1233	1.36495
TraesCS4D02G057400	C5	1.48741	2.71067	2.39408	1.58517	1.29206
TraesCS4A02G036400	C4	2.27638	1.51849	0.829657	2.51196	2.30333
TraesCS4D02G268500	C4	3.27897	1.82913	3.60609	3.74855	4.19081
TraesCS4A02G272700	C5	63.1485	113.982	87.5659	69.9403	58.9602
TraesCS3B02G603800	C5	1.3164	2.60613	2.24807	1.68825	1.0695
TraesCS3D02G543900	C5	1.10633	1.68168	0.775063	0.994952	0.71887
TraesCS5B02G154600	C6	3.80056	14.3212	9.86922	9.15942	9.2213
TraesCS5D02G161800	C6	4.24791	13.0004	11.8518	10.4844	11.1676
TraesCS4A02G105000	C2	1.75316	4.87508	8.27177	7.57801	3.94069
TraesCS4B02G199000	C3	1.33072	3.68004	7.56369	9.01314	4.38714
TraesCS4D02G199900	C6	0.856683	3.65948	5.07484	4.92883	2.83896
TraesCS4A02G094600	C6	1.7512	6.12206	5.5693	7.22311	7.00594
TraesCS4D02G210600	C6	0.822839	4.95018	5.10132	4.79549	3.81711
TraesCS3A02G281400	C2	1.67435	1.35491	1.89433	1.36435	0.939277
TraesCS1B02G079000	C4	40.6914	46.3249	117.375	186.475	350.475
TraesCS3D02G359700	C4	9.10616	6.51034	4.96899	7.02783	11.7271
TraesCS4A02G179000	C4	2.14582	3.75954	4.32889	3.92685	6.62926
TraesCS1D02G202500	C3	0	0.171226	0	1.41203	0.331118
TraesCS4B02G189300	C6	1.8748	5.63773	4.30168	6.19689	4.06771
TraesCS1B02G313700	C2	4.96583	14.5152	26.1234	24.8498	21.1011
TraesCS1D02G302800	C2	5.28824	18.5439	37.2156	33.1591	30.562
TraesCS1B02G314000	C3	0.0250528	0.868512	1.34253	1.73099	1.83212
TraesCS1D02G303100	C4	0.141195	0.267466	3.08163	2.80283	5.06057
TraesCS3D02G334200	C5	0.453715	1.27139	0.202524	0.0642146	0
TraesCS5A02G145200	C2	0.0692026	0.183256	1.81136	1.08357	0.397658
TraesCS1A02G191400	C6	10.8269	31.1415	48.4037	53.4301	29.319
TraesCS1B02G206300	C3	0.852713	3.59259	8.15966	8.80533	5.9947
TraesCS4B02G344100	C5	2.364	5.15517	1.98359	2.50335	1.30665
TraesCS4D02G339200	C6	0.34776	2.8042	1.30476	2.99624	1.87854
TraesCS5A02G512800	C6	0.704867	3.39299	3.60053	4.10865	2.23272
TraesCS6B02G254400	C2	0.77286	1.7133	3.87071	3.08568	2.96828
TraesCS6B02G413100	C6	2.84385	13.6374	23.6355	19.6759	19.6956
TraesCS6D02G360000	C2	4.55517	11.935	33.8259	28.7353	26.4424
TraesCS6D02G358800	C3	0.671309	2.90999	1.66317	3.9269	2.80364
TraesCS1B02G157700	C3	0.234664	0.584259	0.951762	2.13373	1.88553
TraesCS1D02G140300	C3	0.557335	1.3683	1.05218	3.21491	3.30341
TraesCS2A02G525300	C3	0.150467	1.61091	1.13983	2.63214	1.69024
TraesCS7B02G204000	C5	7.2055	7.72987	8.47243	7.01675	5.36973
TraesCS3A02G308100	C4	2.99246	2.53136	3.49686	6.29996	9.75956
TraesCS3B02G393900	C4	23.4599	8.60266	13.0859	18.0791	23.6909
TraesCS1D02G281100	C4	2.4843	2.0944	3.69149	5.93462	11.5225
TraesCS1A02G292100	C6	0.871818	1.4093	0.710972	1.32273	1.34981
TraesCS1D02G294500	C6	0.497184	1.87232	1.60611	2.06506	1.51172
TraesCS4A02G113700	C5	1.31994	1.90529	1.34532	1.55469	0.616376
TraesCS4D02G191800	C5	1.86935	6.04189	2.57661	1.5121	1.24657
TraesCS2A02G106600	C4	3.46172	1.98507	3.98514	4.73943	6.28941
TraesCS2B02G124200	C4	4.86586	1.76197	3.33065	3.87343	6.07157
TraesCS2D02G107200	C4	6.79208	1.48407	4.99695	6.1431	6.84693
TraesCS5A02G147600	C6	1.0759	4.37521	3.76644	3.59527	3.29614
TraesCS5B02G146200	C6	1.8267	5.41958	5.95275	5.06568	4.86102
TraesCS5D02G145000	C6	1.11186	3.8297	3.34142	2.89367	3.00071
TraesCS7D02G366300	C5	0.875634	2.67445	2.0385	1.42872	1.47763
TraesCS4B02G169200	C4	37.2691	28.4666	40.9806	68.0608	82.9635
TraesCS4D02G237800	C6	0.769684	2.75651	2.99921	3.63893	2.56645
TraesCS7B02G430800	C6	0.0620383	1.78131	1.26303	1.06106	0.877822
TraesCS3A02G183600	C5	8.4116	24.5822	19.6753	12.3473	9.95102
TraesCS3B02G213400	C5	14.6519	23.202	16.3377	10.3085	7.47287
TraesCS3D02G187800	C5	10.198	27.0064	20.5878	14.7609	10.2973
TraesCS2B02G171800	C6	0.447994	1.78292	1.2679	2.42103	1.50007
TraesCS2D02G151100	C6	0.375234	1.9093	2.08731	2.92351	2.02047
TraesCS2D02G131300	C3	0.893003	1.45532	0.628211	1.98174	1.73184
TraesCS1A02G214300	C6	0.541213	4.95223	2.5701	3.9404	3.02767
TraesCS1B02G228100	C3	0.0375011	0.364222	0.693169	1.02389	0.493331
TraesCS5A02G458700	C2	18.1328	1.05546	18.8638	11.1266	11.2961
TraesCS6B02G272400	C6	2.88423	16.9625	15.45	11.2172	9.64753
TraesCS6D02G233900	C2	2.37951	4.5407	7.2219	4.63745	4.11679
TraesCS1A02G198000	C6	1.80613	6.43621	9.07692	8.67083	7.10768
TraesCS1D02G201500	C6	2.2359	6.08968	8.69104	8.86069	6.92192
TraesCS7B02G146700	C2	7.08172	10.6227	24.0127	19.1443	15.3107
TraesCS3A02G291300	C5	1.04161	6.45699	3.18751	4.02425	3.41449
TraesCS3D02G291000	C5	0.378022	6.05293	2.65256	3.07834	2.33608
TraesCS2A02G327600	C5	17.1211	82.6813	30.9573	24.8566	18.9941
TraesCS1B02G364200	C3	0.121685	0.395844	0.364431	1.45261	0.220929
TraesCS3B02G315800	C3	0.674067	1.40377	1.08171	2.18456	1.5795
TraesCS3D02G282100	C3	0.857529	2.37609	2.32831	3.74878	3.03916
TraesCS3B02G315500	C6	1.54383	10.55	13.14	11.2317	10.4964
TraesCS1A02G043600	C5	11.3724	16.5642	13.8995	15.4797	8.96133
TraesCS7B02G444800	C5	8.45017	13.2866	4.81508	4.62559	3.00758
TraesCS7B02G445000	C5	1.21526	3.5816	2.18054	1.42386	1.33359
TraesCS7D02G516400	C5	1.15739	4.64515	1.85685	2.58615	2.79808
TraesCS6A02G243600	C5	37.4845	211.443	80.2023	68.4322	54.3949
TraesCS6B02G280700	C5	44.8488	152.394	70.9958	62.6822	51.1717
TraesCS6D02G225800	C5	33.2455	94.2183	51.6797	35.363	28.2358
TraesCS1A02G391900	C5	0.208454	6.3377	1.7955	3.91906	0.769456
TraesCS1B02G420000	C5	0.379825	18.6356	10.989	13.3912	3.30579
TraesCS1D02G400000	C5	0.354457	1.45837	0.169558	0.896458	0.263117
TraesCS3A02G396500	C6	1.42209	12.1256	12.0327	11.7469	7.71626
TraesCS6A02G343900	C6	1.00437	2.9369	4.59497	3.73987	3.84506
TraesCS6D02G325000	C6	0.904341	3.4108	4.2292	2.82327	3.15513
TraesCS2A02G186700	C3	0	0.0117573	0.0122166	2.39206	0.241611
TraesCS4A02G342600	C2	2.51655	4.54008	9.91704	5.69586	6.04965
TraesCS5B02G532100	C2	1.84475	2.4513	6.00101	4.39225	5.29335
TraesCS2A02G392400	C4	2.71521	2.98237	3.45402	6.49521	8.45005
TraesCS6D02G224000	C5	0.653875	7.20874	1.76841	2.00638	2.17749
TraesCS2B02G411000	C4	4.18152	7.18228	10.8774	10.7363	13.9999
TraesCS4B02G367600	C5	294.051	387.263	113.844	8.15211	10.4988
TraesCS4D02G359900	C5	66.952	1663.81	361.532	67.5366	46.3744
TraesCS5A02G535400	C5	27.916	270.092	76.6302	2.62367	0.37069
TraesCS5A02G126500	C6	3.18022	15.809	18.3005	18.1853	13.2673
TraesCS1B02G174400	C4	9.36403	6.15418	8.10239	10.5302	9.93329
TraesCS4A02G081400	C4	1.39942	0.768012	1.13858	1.27612	1.72327
TraesCS7D02G500700	C4	0.23503	1.10642	3.51669	4.42935	5.24131
TraesCS5A02G212600	C2	1.14352	1.5433	4.10049	3.64434	4.54849
TraesCS2D02G004000	C6	2.7843	11.6485	12.3905	7.23895	7.90617
TraesCS3D02G021800	C6	0.991279	3.32255	4.025	2.17839	2.10385
TraesCS4D02G356900	C3	0.109047	0.376907	2.52887	4.55047	2.89688
TraesCS5B02G361500	C3	0.315702	2.09406	2.67723	4.00193	4.03456
TraesCS4B02G198700	C6	3.25204	16.0241	10.5455	14.5682	12.4712
TraesCS4D02G199600	C6	3.66159	11.9115	10.5843	14.8866	13.9404
TraesCS3A02G072700	C5	6.50098	40.3461	16.806	16.1266	7.55396
TraesCS1A02G083300	C4	0.828759	0.171226	0.139421	0.538076	2.18691
TraesCS4A02G171400	C6	1.52291	4.81162	4.3703	4.28983	3.12877
TraesCS4B02G127300	C6	0.834396	3.95657	4.5361	3.24594	2.64674
TraesCS4D02G143800	C2	1.25275	2.50118	4.20834	2.90471	2.63025
TraesCS4D02G185600	C4	1.04699	1.1392	1.32222	2.01119	2.59992
TraesCS4B02G361800	C4	74.9008	56.613	88.9246	104.126	136.611
TraesCS2B02G131200	C3	0.0862789	0.777169	0.931849	4.3913	3.4469
TraesCS3A02G192500	C3	0.774669	1.34748	1.99262	3.19721	2.26166
TraesCS3D02G196400	C3	0.323196	0.943868	1.31357	1.72885	1.47599
TraesCS1A02G251400	C5	3.76817	40.9811	18.3259	15.5719	9.23777
TraesCS1B02G262000	C5	1.89875	30.0468	7.00161	4.33726	1.95668
TraesCS1D02G250900	C5	1.56626	21.316	6.57396	9.57696	4.17231
TraesCS3B02G544700	C6	0.0486435	1.14249	1.03834	1.27171	0.687937
TraesCS1D02G305100	C4	4.03446	4.07721	2.62768	3.90561	4.19455
TraesCS3A02G338800	C5	0.905535	1.67458	0.558685	1.70894	1.02811
TraesCS2D02G322200	C3	1.16813	2.86878	3.17159	10.7218	3.75667
TraesCS7B02G067200	C5	4.39912	21.2867	11.1603	8.15061	2.65474
TraesCS7D02G163100	C5	152.985	156.525	66.4404	42.3978	19.5718
TraesCS4A02G283200	C2	4.54846	2.63389	4.84539	4.3029	4.43937
TraesCS7D02G197200	C5	1.76556	4.38801	1.76041	2.92866	2.53607
TraesCS6B02G223200	C5	3.31454	7.20758	6.57329	5.33247	3.13703
TraesCS6A02G173000	C6	2.13528	6.47053	5.78411	5.80263	4.86204
TraesCS1A02G416200	C4	18.3881	7.47913	20.2029	21.2445	25.5791
TraesCS7B02G196600	C6	1.86567	5.03306	5.86498	5.46843	4.03398
TraesCS2A02G348100	C6	6.69158	20.9511	20.5874	15.1321	13.3642
TraesCS7A02G262200	C5	4.69264	10.5674	5.23712	6.12728	5.42695
TraesCS7B02G159100	C5	2.59574	3.30559	1.73697	2.77465	1.37745
TraesCS5B02G291000	C3	0.103974	0.2041	0.430621	1.61362	0.76467
TraesCS5D02G299300	C3	0.149204	1.00932	2.25824	5.73931	3.36827
TraesCS3B02G563600	C5	7.55117	33.5295	21.5377	16.4382	15.0942
TraesCS4A02G096200	C6	6.89181	23.8488	22.004	15.8286	12.6092
TraesCS4D02G209100	C6	6.7393	31.1902	26.0197	19.3993	16.7909
TraesCS1D02G280400	C3	0.239287	1.57877	3.66621	6.37407	3.8627
TraesCS6A02G193100	C5	9.1479	11.5583	9.90492	8.54636	6.6812
TraesCS6B02G229600	C5	7.38956	12.1424	8.70662	7.45858	6.57188
TraesCS2A02G507200	C6	4.5467	26.1929	21.246	18.9046	18.863
TraesCS2B02G535200	C6	9.53256	35.4354	32.157	26.8349	22.2123
TraesCS7A02G298300	C5	90.5223	94.2351	96.671	84.713	64.7679
TraesCS3D02G394400	C6	1.38505	3.44177	4.44509	3.71951	2.68758
TraesCS3A02G009600	C6	0.558152	1.7183	2.49414	2.2249	2.14157
TraesCS5A02G107200	C3	0.318362	0.889887	1.55315	2.56051	2.07611
TraesCS4D02G011200	C2	3.22329	0.944043	3.12447	2.19478	1.94822
TraesCS3A02G035300	C5	1.40113	9.54492	5.11909	4.72447	4.50777
TraesCS3B02G048900	C6	0.398664	21.2338	11.7428	13.3803	19.1045
TraesCS4A02G098000	C6	2.23677	7.27241	7.15668	4.88284	4.88731
TraesCS4D02G207400	C6	2.24093	6.79129	6.87903	5.13391	4.86094
TraesCS4B02G377200	C5	0	2.09071	0	0	0.0357283
TraesCS7A02G386800	C3	0	0.133481	1.24967	169.045	51.0556
TraesCS7D02G260000	C6	0.499858	4.30418	3.56815	3.27062	1.72389
TraesCS4A02G138100	C6	2.02423	6.46951	4.76456	5.65917	5.08465
TraesCS4B02G159600	C6	0.772226	2.64863	2.63522	2.74362	4.26395
TraesCS3D02G215900	C4	13.5333	10.7979	17.3528	20.8488	28.5672
TraesCS6A02G167100	C4	10.9811	11.2956	20.109	22.1852	27.9097
TraesCS6D02G155600	C4	8.48479	8.62444	15.0787	16.1302	18.9493
TraesCS5A02G356900	C2	21.1496	14.5949	20.5948	18.7668	17.3246
TraesCS5B02G359400	C2	27.9593	25.8944	30.6607	25.3479	21.3095
TraesCS5D02G513700	C5	10.2318	17.8947	9.60283	18.3021	7.38638
TraesCS4A02G169100	C4	804.816	836.789	1552.45	2076.72	3360.71
TraesCS4B02G144200	C4	457.518	733.167	1129.52	1425.93	2349.41
TraesCS4D02G145400	C4	1485.64	1980.55	3433.64	4399.27	7212.56
TraesCS2A02G440800	C5	2.30606	2.42686	1.62009	0.60876	0.0974642
TraesCS4A02G366000	C5	20.1808	82.5541	43.9871	16.9752	8.20497
TraesCS5D02G509200	C2	2.94995	2.72931	8.59205	6.05983	5.22036
TraesCS6B02G297300	C5	6.15005	11.6893	5.8442	7.18679	5.43802
TraesCS2A02G349400	C3	4.76841	8.125	11.1108	25.1749	16.0871
TraesCS6D02G311200	C6	0.0083505	0.809462	1.10029	1.00598	0.846381
TraesCS3A02G420200	C5	1.11915	4.26906	2.25654	1.70999	1.22936
TraesCS6D02G301700	C3	0.567049	1.01692	1.7803	2.48067	2.50333
TraesCS3B02G207900	C6	0.861668	3.51885	4.31422	3.96693	4.70101
TraesCS1A02G134500	C6	1.82986	3.9333	5.81468	5.28617	3.72629
TraesCS2D02G277000	C4	74.6678	64.2995	106.486	117.276	145.305
TraesCS5B02G279000	C2	2.67333	2.94299	4.07118	2.12012	2.23112
TraesCS3A02G414700	C6	0.588777	1.59287	1.92062	2.18204	1.86987
TraesCS3B02G449800	C6	0.734343	2.49321	2.34026	1.68037	1.90489
TraesCS3D02G409200	C6	0.905624	3.15889	3.26369	2.68988	3.54163
TraesCS5A02G036300	C2	0.277282	2.62502	13.3837	9.33893	3.03212
TraesCS5B02G287700	C3	0.649716	0.489827	0.981366	2.43394	2.30116
TraesCS5D02G172900	C3	0.258336	0.21773	0.609835	2.67132	0.486086
TraesCS5A02G146300	C4	2.32189	2.89205	2.37843	2.17586	4.80523
TraesCS5B02G145100	C4	2.19467	1.72344	0.907347	2.15882	4.79229
TraesCS5D02G146000	C4	0.785348	1.21133	0.457004	0.842353	1.71561
TraesCS1A02G302900	C5	66.9886	74.2535	67.5117	63.1224	47.5275
TraesCS1A02G133400	C6	4.48709	19.3296	17.2497	15.9482	11.7349
TraesCS1D02G124300	C6	3.68129	12.065	11.1019	12.1109	9.09101
TraesCS2B02G107200	C5	0.797205	1.30135	1.25834	0.954557	0.623925
TraesCS5A02G084000	C5	0.197819	1.09681	0.224111	0.298611	0.233107
TraesCS1A02G287500	C5	5.20428	12.8471	7.20747	7.80073	5.04509
TraesCS1B02G296900	C5	4.58291	13.2419	8.02741	8.32213	6.27569
TraesCS1D02G286400	C5	5.32736	12.5912	6.71538	7.29814	5.84183
TraesCS2A02G254300	C3	0.0207528	1.23034	0.885788	2.80545	2.02567
TraesCS2B02G267800	C6	3.68877	11.7636	11.4846	15.6284	13.785
TraesCS4A02G186100	C5	14.4217	15.4557	12.1197	12.925	8.01475
TraesCS4A02G244000	C6	5.12746	17.6823	16.5644	13.4664	11.7408
TraesCS3B02G124300	C2	5.39902	5.52285	6.24626	5.43627	3.95066
TraesCS1D02G295900	C4	9.32337	20.6528	25.1693	30.4791	39.1436
TraesCS4A02G106700	C6	10.7599	30.679	34.8166	34.5521	18.2479
TraesCS1B02G451500	C6	13.5622	38.669	42.9705	33.2536	36.1045
TraesCS1D02G428400	C6	15.8996	40.8042	52.4851	42.1431	48.9176
TraesCS2B02G299400	C2	0.56366	0.0705831	1.04295	0.828772	0.674116
TraesCS2B02G266200	C5	56.2663	200.417	114.755	115.392	99.9752
TraesCS2D02G250700	C6	27.6477	86.1741	59.2392	66.0861	60.9051
TraesCS5B02G427700	C6	2.521	11.3609	6.44517	13.6724	11.7044
TraesCSU02G076300	C3	1.4818	6.94335	7.20711	13.0719	12.2196
TraesCS4A02G159000	C2	2.27084	5.73002	10.2691	6.10596	5.77951
TraesCS5B02G429000	C4	3.23484	2.13321	1.97108	3.00314	3.45551
TraesCS5D02G399500	C5	3.71343	4.89191	2.89769	0.0286235	0.380877
TraesCS2D02G171300	C6	0.5259	1.78695	1.11156	1.66126	1.35126
TraesCS7B02G071700	C2	1.29308	0.646181	1.49667	1.32844	0.626059
TraesCS3D02G470500	C6	1.35075	8.39518	6.12515	9.09896	12.7189
TraesCS3B02G359100	C2	1.43185	1.62297	2.01366	2.29026	0.878231
TraesCS3B02G179200	C4	27.7532	48.6861	72.5683	90.9845	140.342
TraesCS3D02G159900	C4	22.4428	40.5529	53.95	65.7022	98.2492
TraesCS2A02G186900	C2	3.08473	3.99288	11.6928	7.02759	4.96524
TraesCS5B02G533500	C4	0	0.0359101	0.187806	0.930948	1.23689
TraesCS4A02G151300	C6	6.20377	21.8426	27.005	19.277	18.1611
TraesCS5D02G482900	C2	0.650037	1.42302	2.37946	1.14801	0.825124
TraesCS5A02G224900	C2	0.555856	0.187215	2.11983	1.07997	1.45287
TraesCSU02G136900	C4	0.90139	2.71847	3.67566	3.96668	5.33458
TraesCS1B02G420300	C5	7.16099	133.138	100.27	28.3383	26.9381
TraesCS1D02G400300	C5	9.39924	116.485	76.7253	15.1762	14.6166
TraesCS2A02G356000	C6	0.603027	2.39982	3.1302	3.27388	3.6722
TraesCS2D02G352100	C6	0.600652	2.57857	2.99862	3.1046	4.33392
TraesCS3A02G134600	C5	0.0810743	2.19467	0.413661	0.266371	0.0818086
TraesCS3B02G168300	C5	2.93835	15.1259	2.71259	0.72066	1.03005
TraesCS3D02G150800	C5	2.59306	13.6675	2.38596	2.99656	1.59168
TraesCS5B02G043700	C3	0.0129679	0	0.394671	1.3096	1.17013
TraesCS6A02G126500	C3	0.0268858	0.845157	0.283569	0.974438	1.08049
TraesCS3D02G170400	C6	0.529689	6.5121	5.49657	8.2603	7.88351
TraesCS3D02G321200	C6	3.29421	13.9185	9.55585	12.8099	7.72085
TraesCS2A02G591500	C4	2.93018	1.11161	2.35109	2.69555	2.77136
TraesCS2D02G562800	C4	2.15553	1.39757	2.03284	3.14813	3.31498
TraesCS6A02G176400	C4	32.4353	10.3758	18.4861	29.413	43.6511
TraesCS6B02G209100	C4	8.38757	3.5501	4.76587	6.52473	10.1838
TraesCS6D02G167500	C4	33.8172	8.90434	16.8265	26.1359	42.4329
TraesCS2A02G510700	C5	1.49316	3.18826	0.584166	1.0609	0.573939
TraesCS3A02G109300	C3	0.518819	8.80019	19.2551	29.9687	16.8505
TraesCS3B02G128500	C3	1.27993	7.77507	14.9509	23.5325	13.2572
TraesCS3D02G111100	C6	1.46401	19.9835	30.5716	36.5469	19.1047
TraesCS3B02G020800	C4	2.14036	3.14136	5.62514	6.7549	8.76987
TraesCS2D02G363700	C6	5.33438	11.5314	16.5231	13.7382	11.8069
TraesCS1A02G106600	C5	71.4087	92.7678	58.832	40.7105	37.1111
TraesCS4A02G172400	C6	4.42482	15.0818	12.7603	11.1737	10.6216
TraesCS4B02G144100	C6	2.6236	13.5099	12.8049	10.6889	10.1794
TraesCS4D02G142700	C6	3.16433	9.73832	11.0278	8.58281	8.34281
TraesCS7D02G344900	C5	4.48603	5.00929	1.92155	0.947962	0.943137
TraesCS3B02G496800	C2	4.31286	0.850653	4.59431	3.61847	4.70256
TraesCS2D02G188800	C5	58.3683	108.1	92.9916	58.9583	32.3215
TraesCS1A02G351900	C5	11.0229	14.4323	8.03854	9.37157	6.01049
TraesCS3A02G021800	C3	0	0.0467905	0.116585	5.83387	1.00472
TraesCS3A02G022900	C6	0.253697	4.02195	2.44074	2.70441	1.47085
TraesCS3A02G023000	C5	0	1.12813	0.141885	0	0.0578112
TraesCS3D02G023200	C5	1.03976	5.34483	1.41516	1.05135	0.703855
TraesCS4D02G321400	C3	0.0640569	0	0.145336	1.06607	0.66972
TraesCS5A02G496800	C3	0.0804593	0	0.143179	1.13861	0.923941
TraesCS5B02G061000	C6	0.239564	5.53779	4.59011	5.39191	3.92603
TraesCS6A02G090500	C4	0.0139191	0	0.656392	5.41725	5.44768
TraesCS6A02G090600	C3	0	0	0.725377	3.38197	2.09671
TraesCS6A02G419300	C4	0.0710317	0.0482993	0.56778	5.14864	4.85873
TraesCS6A02G419500	C4	0	0.0172487	0.26817	2.35447	2.43617
TraesCS6D02G078700	C2	0.18797	0	1.25997	0.487959	0.0169305
TraesCS6D02G078800	C4	0.102499	0	0.659181	6.17866	6.22628
TraesCS6D02G078900	C3	0.0353187	0	0.661927	2.74452	1.85335
TraesCS6D02G406800	C4	0	0	0.124055	1.8327	2.40071
TraesCS6D02G406900	C4	0.00823609	0	0.0195908	0.545221	1.85894
TraesCS6D02G407000	C4	0.0754444	0.0149557	0.091745	4.28806	5.58217
TraesCS7A02G236300	C3	0	0	0.452258	1.91543	1.63099
TraesCS7D02G236400	C3	0.102206	0	3.56281	8.02258	4.81115
TraesCS7D02G209700	C5	0.773775	2.54299	1.7221	1.58635	1.49771
TraesCS4A02G234100	C6	11.0183	77.3584	63.2318	64.4463	52.2677
TraesCS4B02G081200	C6	0.552554	47.601	33.9929	57.3776	41.2353
TraesCS4D02G079900	C6	1.93449	45.0206	29.7704	36.6396	22.5996
TraesCS2B02G285700	C3	0.413889	0.960784	1.38019	1.44234	1.55429
TraesCS5D02G245600	C3	0.395159	0.618314	0.157193	3.76225	0.977287
TraesCS6A02G150500	C2	7.27523	9.16723	19.6317	13.8958	12.8176
TraesCS6B02G178600	C6	7.0317	17.464	24.4872	17.6213	16.9955
TraesCS1B02G153000	C3	0.411571	2.33559	3.77971	5.49305	3.73085
TraesCS1A02G023300	C3	0	0	0.021026	6.81467	6.07436
TraesCS1D02G022800	C3	0	0.0206532	0.447796	112.948	81.3067
TraesCS2D02G431400	C3	0	0.199355	0.046075	28.2516	23.4828
TraesCS3A02G519700	C4	0	0	0	1.17048	1.45315
TraesCS3B02G512300	C3	0	0	0.0245874	5.91025	4.09428
TraesCS3B02G587300	C3	0	0	0	6.25425	5.48204
TraesCS3D02G306100	C3	0.0685549	1.28185	0.143801	10.5168	7.13376
TraesCS3D02G526100	C4	0	0.0247736	0.0481789	6.92273	14.1425
TraesCS6A02G415200	C6	1.10688	3.44919	3.64465	4.31027	5.36938
TraesCS7A02G561600	C6	0.860799	3.40584	2.70832	3.57168	2.21391
TraesCS7B02G502200	C6	3.5141	13.2549	9.25602	17.0342	10.0696
TraesCS7D02G548200	C5	6.95293	7.11883	5.65083	8.25924	5.1201
TraesCS6B02G461200	C5	1.44105	6.40869	2.60184	2.98405	4.20059
TraesCS5B02G274300	C6	4.71068	19.1654	19.7633	13.9641	12.1454
TraesCS5B02G274800	C3	0.418832	2.02798	1.62767	3.05929	3.34731
TraesCS6A02G293300	C6	2.34289	5.37832	6.98768	7.85666	7.28977
TraesCS6B02G323500	C6	3.15047	8.54839	9.35447	10.2239	10.3872
TraesCS6B02G229300	C5	11.3572	29.1134	17.5509	19.2205	15.9144
TraesCS6A02G292000	C4	1.07591	0.667107	0.96233	1.71219	1.76752
TraesCS6B02G322400	C3	0.857097	0.854408	2.25572	4.13595	3.41547
TraesCS3B02G127700	C6	5.08325	17.3662	12.0202	13.797	11.4598
TraesCS3A02G460900	C5	2.29032	8.49375	3.55965	4.44977	1.96657
TraesCS1A02G109400	C4	2.27971	2.46753	4.79726	4.89525	6.24824
TraesCS3A02G286100	C5	0.252111	3.53994	0.404292	1.01419	1.09672
TraesCS7A02G470800	C6	0.583624	4.37352	6.73574	3.38723	2.89689
TraesCS7B02G372600	C6	2.24437	9.54348	11.8254	13.2379	13.6097
TraesCS7D02G458200	C6	2.11868	8.44844	11.0088	4.09077	3.42433
TraesCS1B02G176500	C4	0.950979	1.47921	1.10567	1.38058	2.42331
TraesCS4D02G016500	C3	0.583415	1.67742	2.795	5.07049	4.68406
TraesCS5A02G384400	C6	0.15264	0.966275	0.606258	0.682897	1.01113
TraesCS5A02G383200	C3	29.1323	69.6479	70.6828	129.68	106.418
TraesCS5A02G370800	C6	1.9535	6.02621	5.70719	4.99485	5.87399
TraesCS5D02G380500	C6	1.95728	5.57266	5.22708	4.96473	5.56007
TraesCS2B02G257400	C4	7.23566	6.28854	10.0072	20.7976	20.7946
TraesCS7A02G516000	C6	10.4101	20.5614	22.7171	15.0079	11.4001
TraesCS4D02G312900	C5	68.2782	89.2845	77.8649	59.6799	40.5577
TraesCS2A02G046100	C4	0.0791417	0.813658	0.223002	1.81809	2.01221
TraesCS2A02G544800	C2	0.225727	0.377181	6.61151	2.23237	1.58057
TraesCS2B02G575600	C6	0.304948	4.18287	5.28553	2.85611	2.25154
TraesCS2D02G545700	C6	0.168922	2.31037	1.16645	1.30263	1.58796
TraesCS2D02G545900	C5	0.642558	90.5706	53.4466	18.8912	10.9035
TraesCSU02G022800	C3	0.358418	0.579518	0.581772	4.40294	3.02921
TraesCS1B02G260400	C6	17.8062	104.821	91.0572	66.2754	48.2599
TraesCS4D02G126400	C3	0.300655	0.956519	0.713712	1.7878	1.20559
TraesCS3B02G322900	C3	0	0.891934	1.37037	2.77668	2.69605
TraesCS3D02G288100	C6	0.0415676	8.29379	5.58392	6.1722	4.81053
TraesCS3B02G274700	C4	2.36531	2.76287	3.61143	4.82618	6.47741
TraesCS3D02G246100	C3	2.74779	3.67913	5.79651	7.50784	8.12113
TraesCS6D02G179400	C5	3.68302	3.86267	3.84306	4.04368	2.72346
TraesCS7A02G123300	C5	0.856496	3.54085	0.593428	2.05009	2.62741
TraesCS7B02G022400	C5	0.936091	5.65622	0.513043	0.440914	0.551788
TraesCS7D02G121400	C5	1.02399	1.30016	0.12381	0.121747	0.376174
TraesCS2A02G011300	C4	14.3865	11.3925	16.1624	28.8416	44.6518
TraesCS2A02G278700	C4	11.6928	15.4147	13.8799	19.6041	31.2059
TraesCS5B02G062700	C6	1.6258	6.00379	4.80781	4.21377	8.19301
TraesCS3A02G231300	C6	0.139114	6.26104	8.38319	9.06547	11.5611
TraesCS3B02G260500	C6	0.278251	14.3682	10.4986	12.2616	19.8551
TraesCS3D02G222100	C4	0.0834217	15.0843	10.253	16.6708	30.1451
TraesCS7A02G230000	C5	5.76547	11.8033	1.45424	2.15291	3.96258
TraesCS3B02G086700	C5	15.5322	53.1595	40.1877	29.5935	13.8214
TraesCS6D02G182700	C6	2.58101	6.87207	7.57591	10.0091	6.25225
TraesCS3B02G477400	C5	2.38932	2.90847	1.14781	1.10112	0.862039
TraesCS5B02G133900	C3	6.73348	5.86316	13.3367	16.1165	14.2131
TraesCS1B02G047400	C3	4.49958	9.66499	15.5743	15.8103	17.7572
TraesCS1D02G038300	C6	3.67901	22.0078	37.7377	32.356	35.5044
TraesCS3B02G099400	C3	0	0.316194	0.795426	1.87148	1.10501
TraesCS1D02G132000	C6	0.669684	2.1792	1.65275	1.86626	1.71296
TraesCS5A02G171000	C5	2.68119	10.616	6.88942	6.19696	3.90624
TraesCS5B02G168500	C5	1.86517	8.81923	5.41673	4.76613	3.44368
TraesCS5D02G175700	C5	2.57501	9.60134	7.28473	6.59684	4.1636
TraesCS1B02G108100	C6	1.50587	4.21415	5.30461	3.7903	5.41539
TraesCS4D02G065700	C4	2.44805	1.54201	2.76584	4.37527	4.7659
TraesCS1A02G257200	C5	2.48992	36.7668	5.9121	8.16961	5.30093
TraesCS1B02G267700	C5	0.419614	12.7169	1.91598	2.05474	1.11064
TraesCS7A02G185200	C5	0.638637	1.27912	0.301805	0.645901	0.779883
TraesCS2D02G417200	C6	1.99113	9.4212	6.73535	5.33752	5.38375
TraesCS4A02G101700	C2	0.785091	16.831	32.2338	3.892	1.32656
TraesCS4D02G203800	C2	1.15227	21.2844	39.6248	3.51197	1.35308
TraesCS2A02G261100	C6	2.00678	8.0086	8.72574	5.53945	6.1579
TraesCS6A02G231000	C3	0.440004	6.94215	8.39538	11.4534	12.122
TraesCS4B02G293500	C2	0.667724	1.62814	3.25162	2.29644	3.30818
TraesCS5A02G424900	C4	5.41041	4.14941	8.33867	12.1554	23.1224
TraesCS1B02G342000	C6	0.555485	1.45138	1.76851	1.53495	1.35724
TraesCS7D02G324400	C5	20.5609	36.2868	30.5478	29.3329	19.1129
TraesCS5A02G129700	C4	2.04952	2.64817	4.1587	9.17884	15.2859
TraesCS5B02G128400	C4	0.678235	0.936652	2.42747	3.5619	4.99886
TraesCS5D02G137200	C4	2.65069	2.30543	7.14716	11.2852	12.8942
TraesCS4B02G133400	C5	66.7676	192.796	115.116	121.92	130.124
TraesCS5A02G210100	C6	1.2762	64.7384	35.9684	43.0526	27.8957
TraesCS5B02G208100	C6	0.436479	84.6985	48.5446	83.1148	37.1313
TraesCS3B02G080500	C6	1.821	5.12276	5.00533	4.28166	5.05932
TraesCS3D02G067000	C6	1.29903	4.16617	4.78123	3.421	4.52164
TraesCS4D02G197900	C4	3.21778	4.06391	6.27487	9.53559	14.4479
TraesCS7D02G403100	C5	1.07503	3.53486	2.50556	2.28497	1.51737
TraesCS4A02G324600	C5	1.96249	3.83325	2.87409	2.62478	1.98308
TraesCS5D02G555300	C5	3.68866	4.22578	2.82028	2.82493	2.57429
TraesCS3A02G356700	C4	0.204772	0.0968636	0.988693	2.99835	4.62618
TraesCS3A02G535000	C6	1.11094	7.24545	10.6993	10.503	9.14048
TraesCS3B02G389500	C4	0.210743	0.0568706	1.96048	3.42852	4.36104
TraesCS3D02G350800	C4	0.161747	0.111448	0.475068	1.25528	2.15745
TraesCS3D02G540500	C4	3.68724	2.79489	2.86472	5.11412	5.30493
TraesCS5A02G479100	C5	8.31808	13.5959	5.86194	7.80649	6.15115
TraesCS2D02G218200	C6	1.5751	5.97457	6.66869	5.18843	6.2526
TraesCS7B02G047300	C6	7.00943	20.5435	24.6482	14.7799	16.1427
TraesCS7D02G146400	C5	14.9981	22.3466	22.0411	12.0166	13.8041
TraesCS4D02G147800	C5	22.3059	23.2542	20.8356	18.2563	16.204
TraesCS4A02G411700	C6	0	6.36193	9.01616	8.11481	2.86892
TraesCS3B02G230900	C6	1.29725	3.2817	3.85958	4.39191	3.94655
TraesCS3D02G429200	C6	19.3479	65.094	91.6928	71.2433	69.1479
TraesCS1B02G093900	C3	0.395946	0.725614	2.68396	10.2658	5.76582
TraesCS6D02G108200	C3	0.478943	0.785089	1.00078	2.26568	1.60884
TraesCS5D02G029800	C4	0.878651	1.63474	2.14612	2.24455	3.09595
TraesCS1B02G345500	C4	9.7032	7.72032	11.5029	14.9626	16.9644
TraesCS5D02G074500	C3	0.40284	0.778584	1.18255	1.55634	1.29392
TraesCS4A02G242800	C5	2.00265	5.15325	0.211793	0.0687305	0.0416799
TraesCS4B02G072300	C5	0.235041	1.41357	0.270789	0.715026	0.413773
TraesCS4D02G071100	C5	1.6049	3.13967	0.44553	0.447758	0.121003
TraesCS2B02G276900	C3	0.641092	0.709779	1.46652	1.88178	1.41971
TraesCS5B02G135800	C3	2.25988	0.478742	3.60921	17.6134	12.6038
TraesCS6A02G113300	C6	4.48657	17.5373	13.4857	12.4337	11.418
TraesCS6B02G141100	C6	4.80704	14.2343	13.7802	12.6751	11.8551
TraesCS5A02G239200	C4	1.71198	0.121045	1.25324	10.5199	17.6758
TraesCS5B02G237800	C4	1.35711	0.158422	0.0248506	2.52949	3.53712
TraesCS5D02G246300	C4	3.29689	0.0251483	0.649753	6.01138	11.2669
TraesCS5B02G409500	C5	3.03695	7.90419	1.22582	0.970062	1.11811
TraesCS5A02G403400	C3	1.26413	0.146503	1.13744	2.0233	1.57305
TraesCS5B02G408200	C3	1.31912	0.521432	1.26773	2.20442	1.4416
TraesCS2A02G198900	C6	1.44699	10.3414	7.87787	4.85618	5.15078
TraesCS5A02G053600	C6	3.7557	16.1859	14.2037	18.5488	14.3672
TraesCS5D02G065000	C4	14.7112	19.4084	15.9851	27.8242	34.4008
TraesCS7D02G380100	C3	0.13093	0.400033	0.896455	1.70025	1.14674
TraesCS1D02G205700	C5	9.58169	15.0021	7.23699	8.67806	7.49604
TraesCS3A02G485100	C2	0.945724	0.539612	1.81649	1.34171	1.2738
TraesCS2A02G102300	C3	6.21992	16.4737	20.7837	23.34	27.8787
TraesCS3A02G187100	C5	10.6511	39.1515	22.5921	19.2717	19.2238
TraesCS2A02G249400	C6	0.140204	3.39802	2.47402	1.94118	2.91635
TraesCS2D02G250900	C5	11.6094	25.8928	19.8122	13.6948	12.8813
TraesCS1B02G086600	C4	12.8994	8.58356	13.2898	16.6359	18.4274
TraesCS2D02G251100	C6	2.08895	9.01574	8.90173	7.15537	5.22817
TraesCS2A02G583100	C5	4.27774	63.3287	17.1249	6.90135	10.9036
TraesCS2B02G603500	C5	19.2789	261.437	61.4772	30.3614	28.6867
TraesCS4A02G285700	C4	3.08173	3.41625	2.66203	13.1848	17.4995
TraesCS1A02G143000	C6	8.48412	37.6284	39.1499	42.798	35.2147
TraesCS1B02G158600	C3	0.838315	5.30984	6.03337	9.44492	6.70702
TraesCS1A02G143600	C6	0.323616	1.22112	1.61748	1.17347	1.18212
TraesCS1B02G161000	C5	0.836675	3.97951	3.55465	1.36567	1.50078
TraesCS1D02G281900	C5	2.38953	5.4428	2.45142	3.1669	3.42591
TraesCS3D02G461600	C2	3.7794	3.77964	9.39895	9.54235	8.20929
TraesCS6B02G191000	C5	8.01989	68.5844	20.2249	17.7749	8.05934
TraesCS6D02G152300	C5	0.220196	36.62	8.42707	5.74503	2.03015
TraesCS3B02G541500	C5	0.778961	8.17225	11.7905	1.12716	0.466821
TraesCS3D02G485000	C5	3.91244	12.558	12.5917	1.08993	0.359639
TraesCS5D02G032900	C2	1.57077	2.70734	5.98393	4.97251	4.65863
TraesCS4D02G336400	C6	2.16762	6.18663	6.42803	5.71484	6.88063
TraesCS5A02G509700	C6	3.19762	9.68441	10.0211	9.69679	13.5448
TraesCS2A02G284400	C5	46.2189	58.7136	40.9422	36.9444	25.2613
TraesCS2B02G094300	C6	18.1146	60.2947	52.7266	37.6531	31.4338
TraesCS2B02G301400	C5	26.4694	40.1099	28.4952	26.3745	18.3355
TraesCS2D02G076900	C5	17.1124	80.2522	53.9689	37.8059	31.3148
TraesCS2D02G283300	C5	44.0939	46.6483	31.8835	28.4253	20.0695
TraesCS4A02G093200	C3	0.234056	0.252072	0.44795	1.96248	0.87241
TraesCS4D02G211900	C3	0.899395	0.361303	0.113551	1.50541	0.818685
TraesCS4B02G230200	C2	0.0518778	0.0273213	2.8393	2.70223	2.18041
TraesCS4B02G193400	C3	1.14959	0.25273	0.779697	4.80854	2.56211
TraesCS1A02G145100	C3	0.0659606	0.823483	0.659257	1.30934	0.778029
TraesCS1B02G162400	C2	0.104365	0.451848	1.56717	1.2525	0.984592
TraesCS3D02G471100	C3	0.370791	0.393525	0.932755	1.88027	1.8433
TraesCS2A02G124700	C6	2.15817	6.72951	7.62841	6.2855	5.02225
TraesCS2A02G306800	C5	0	10.2383	0.400999	0.311505	0
TraesCS3B02G442900	C6	1.97128	7.005	7.10454	6.33964	6.01417
TraesCS2D02G132100	C2	15.7616	10.7998	25.3115	20.9226	18.5145
TraesCS7A02G142000	C3	1.17786	1.0415	2.11889	2.57745	1.88564
TraesCS7D02G143300	C3	3.2496	4.70972	9.12375	11.5177	10.8577
TraesCS6A02G396300	C5	1.23333	1.43745	0.718928	1.0327	0.898217
TraesCS6D02G381200	C5	0.718366	1.21306	0.677314	0.78201	0.370142
TraesCS4A02G013700	C5	2.19059	17.6275	8.81964	5.70783	3.02574
TraesCS4B02G290000	C5	1.83797	9.48338	4.78672	2.93638	2.09358
TraesCS3A02G176700	C3	2.64176	7.15689	13.1782	15.8976	16.0734
TraesCS2B02G410900	C4	1.40026	1.3264	3.6464	3.63091	6.84375
TraesCS2D02G390900	C4	0.446644	1.16869	2.32089	2.19418	4.13202
TraesCS3B02G080300	C4	5.86408	6.98239	15.8627	17.7056	21.5097
TraesCS1D02G129100	C4	2.92655	2.80935	5.515	4.79245	6.8259
TraesCS4B02G083300	C6	0.355626	1.41121	1.06056	1.47069	1.06625
TraesCS2A02G353500	C5	11.2262	11.9225	9.35187	7.66331	7.58837
TraesCS5B02G562400	C4	3.18484	2.53747	3.21841	4.99639	5.697
TraesCS1B02G176200	C6	3.4796	9.74119	8.79674	6.66399	6.80288
TraesCS4D02G348300	C3	1.25821	2.83516	2.98687	5.05196	3.33943
TraesCS2B02G418100	C6	1.59013	5.52794	3.99139	6.20409	4.37434
TraesCS2A02G582000	C4	45.6979	11.7459	41.0353	42.3124	47.4563
TraesCSU02G089705	C6	0.4994	1.4228	2.02103	2.08781	2.08372
TraesCS1A02G352500	C4	2.86738	0.584217	2.3066	4.92953	5.05196
TraesCS3A02G111400	C5	21.888	27.1417	20.0764	24.3457	15.7224
TraesCS3B02G132400	C5	29.2874	35.0275	23.4148	25.134	18.2943
TraesCS3B02G139100	C3	0.0759273	0.0201687	0.0489503	1.02236	0.483859
TraesCS3B02G251100	C5	13.3355	22.8103	16.9116	18.7704	11.91
TraesCS3D02G121800	C3	0.0241684	0.0268114	0.0429415	2.45887	0.511513
TraesCS3D02G434200	C6	0.186209	2.76557	1.43105	1.84045	2.27433
TraesCS7A02G318400	C5	2.27645	2.53789	1.00974	0.38267	0.53709
TraesCS7B02G038600	C4	0.502567	0.435807	0.603048	2.94917	3.72417
TraesCS7B02G219300	C4	0.0328148	0.242402	0.891833	0.855133	1.09711
TraesCS7B02G257000	C3	4.47042	4.04406	3.20385	6.65248	5.91376
TraesCS7B02G257300	C3	0	0.0350467	7.52147	25.6031	19.1475
TraesCS7D02G315000	C6	0.10727	8.94223	6.88348	3.43759	4.37958
TraesCS1A02G225600	C3	2.2445	4.39192	6.60465	6.70287	8.03172
TraesCS1B02G239000	C6	1.05424	2.37782	3.22872	3.098	4.02132
TraesCS1D02G226800	C6	1.57609	4.75224	4.88206	5.31238	6.1768
TraesCS4B02G185100	C4	6.02401	0.15408	3.03598	10.7724	8.74547
TraesCS5A02G095000	C6	4.82582	15.3457	13.2873	17.2323	9.74192
TraesCS5B02G101200	C6	5.31583	16.4503	14.9823	21.3171	11.5498
TraesCS5D02G107600	C6	2.47542	21.6701	19.1974	22.3996	12.2946
TraesCS7A02G455400	C4	6.34305	2.11453	5.77268	6.59752	7.90007
TraesCS7B02G018200	C2	0.065925	0.972586	2.64121	1.14468	0.713723
TraesCS3A02G224700	C5	2.53802	7.82074	4.71775	4.54162	3.55211
TraesCS3B02G254200	C6	2.39984	6.67425	6.1413	4.94964	4.48848
TraesCS2A02G151300	C3	2.46763	7.89641	15.4125	14.8904	14.9314
TraesCS2D02G156500	C6	0.391213	4.50492	3.83082	2.6003	2.33309
TraesCS2B02G174500	C4	18.4576	11.8337	7.42023	15.4723	20.9371
TraesCS2A02G387500	C6	0.397086	1.51045	1.00721	1.37346	1.30776
TraesCS2B02G109900	C2	1.81937	0.953346	2.37388	1.80473	1.67352
TraesCS2D02G317600	C6	0.636829	2.90827	2.56388	2.15952	2.40268
TraesCS2A02G067400	C2	14.7843	4.36755	23.819	18.4829	15.4178
TraesCS2B02G079600	C2	2.37196	0.56776	4.92318	3.13816	2.95105
TraesCS1D02G088200	C5	12.2215	12.7889	11.5973	7.80848	6.79365
TraesCS1A02G320900	C5	1.21396	3.7459	0.571126	0.621088	0.658014
TraesCS1D02G320800	C5	0.938786	2.33336	1.12322	1.30351	0.942731
TraesCS2B02G282500	C6	0.91461	7.83956	7.60627	8.58202	7.28136
TraesCS2A02G315900	C4	0.0515598	0	0	0.265151	1.02222
TraesCS2D02G129900	C6	0.382265	2.30586	1.8767	2.24516	1.61321
TraesCS2D02G130200	C5	2.26873	6.56482	2.80347	3.33045	1.48612
TraesCS4A02G480900	C5	10.5166	13.397	11.6584	10.7419	7.61514
TraesCS7A02G016000	C5	27.6652	35.3851	22.0888	29.7129	16.757
TraesCS3A02G276800	C2	0.391471	0.204777	2.23958	2.11111	1.46057
TraesCS3B02G310900	C2	0.618075	2.34715	6.78961	4.34085	1.42089
TraesCS3B02G311000	C2	0.273423	0.274797	2.05555	1.60364	1.57767
TraesCS3D02G276900	C2	0.321157	0.371231	1.18721	0.186236	0.0496302
TraesCS3D02G277000	C2	0.396204	0.615629	2.20662	1.98726	0.944752
TraesCS2B02G460300	C4	3.51891	6.70194	5.67446	7.67226	11.3046
TraesCS7A02G368300	C3	2.26559	3.59205	5.23279	7.59775	8.25261
TraesCS2B02G327800	C4	1.58463	1.2428	1.58465	2.50174	3.30527
TraesCS3A02G389800	C5	10.3634	23.5158	13.5316	10.31	9.17234
TraesCS3B02G419000	C5	2.54247	13.2848	7.58093	8.42744	6.82394
TraesCS3D02G379900	C5	4.87614	15.2163	5.80226	6.53519	4.17709
TraesCS5A02G194800	C3	0.872034	2.43312	3.85158	5.78144	4.66296
TraesCS5B02G190200	C2	3.00597	1.8282	5.46744	3.60099	3.40988
TraesCS3B02G322600	C3	3.66346	4.25706	7.83802	10.6331	10.3533
TraesCS3A02G237800	C2	8.7273	6.56624	13.8451	2.41748	0.629898
TraesCS2D02G398800	C6	1.3339	3.47229	4.14186	4.37757	3.00216
TraesCS5A02G367000	C5	3.16373	5.56242	3.81696	3.2785	1.87341
TraesCS4A02G422800	C2	5.05411	2.82239	7.97373	6.7141	5.88606
TraesCS7D02G060500	C2	7.81436	2.78242	13.4894	9.45505	6.01101
TraesCS7D02G068700	C5	16.6698	19.4434	17.1254	8.47082	9.05913
TraesCS2D02G383200	C4	5.64202	2.13116	3.4949	5.55556	5.88697
TraesCS5B02G274500	C5	32.0075	32.8812	25.0492	25.6562	21.2209
TraesCS7A02G220700	C2	0.700972	3.59891	9.0125	2.23172	0.869683
TraesCS7B02G126700	C2	6.01251	13.9788	23.2983	13.4365	6.97691
TraesCS7D02G221400	C2	2.09153	4.88537	11.2058	2.8688	0.629094
TraesCS4A02G265600	C6	0.822609	3.81203	5.52781	5.21394	5.97112
TraesCS4D02G049600	C5	3.27338	10.0265	6.36678	5.56114	5.52096
TraesCS3B02G462700	C5	0.0422539	4.65281	0.981342	2.05575	0.965048
TraesCS3D02G421300	C5	0.0283216	7.16945	3.22278	4.31215	1.49285
TraesCS2B02G384500	C3	19.6414	11.5464	15.8289	27.5969	19.8768
TraesCS2D02G364000	C6	1.61321	4.8287	4.63537	3.57191	4.41514
TraesCS1A02G080200	C4	5.67633	5.54879	8.81242	9.92844	12.9598
TraesCS4A02G108100	C6	1.29139	8.45971	8.47367	9.64137	8.04591
TraesCS6B02G062400	C5	0.89503	2.23297	0.483379	0.349171	0.491009
TraesCS2A02G250200	C2	1.38052	1.71387	3.64478	2.98612	2.23701
TraesCS2D02G251400	C2	1.96306	1.49265	4.89016	4.43703	3.30868
TraesCS1A02G236400	C6	0.418019	4.78275	6.40615	4.0888	3.8818
TraesCS2A02G114300	C6	7.89131	39.7516	31.4181	25.6779	30.1049
TraesCS2D02G115100	C6	6.20895	20.4065	18.9548	12.4347	14.6898
TraesCS3A02G449000	C2	15.2986	10.4392	39.554	28.8358	26.2351
TraesCS3B02G485700	C2	14.8515	9.17938	51.6698	38.0983	33.6973
TraesCS3D02G443900	C4	14.8423	10.0698	12.7841	16.4766	14.8791
TraesCS5D02G493500	C2	3.51016	4.40989	9.72739	7.56647	6.9126
TraesCS4A02G365200	C3	2.54086	2.24219	1.68093	4.0933	3.09461
TraesCS5B02G508200	C3	1.34109	1.08459	0.941318	3.70144	2.06768
TraesCS5D02G508200	C3	1.62205	1.81152	0.752008	2.38416	1.96205
TraesCS2B02G179400	C2	93.3263	87.8421	98.7835	91.9239	61.4441
TraesCS6B02G304200	C5	13.2629	20.2313	21.3012	18.5503	10.0305
TraesCS1A02G220700	C2	0.039354	2.90018	14.6345	10.3243	14.8594
TraesCS1B02G234200	C4	0.0352622	0.978189	3.95319	3.06405	6.51511
TraesCS4D02G363600	C5	0.0744468	3.78797	1.91358	1.27017	1.51777
TraesCS5A02G540300	C4	0.0492987	0.368731	1.8139	1.84908	2.45923
TraesCS7B02G474000	C5	0.0816007	82.092	16.1966	3.52419	1.03799
TraesCS7A02G385200	C5	11.7547	26.6531	13.6819	13.7891	18.3032
[truncated: 7,473 more rows]

## Sheet: Table S9
Table S9. Expression patterns auxin, cytokinin and regeneration related genes.
GeneID	Group1	Group2	RNA.cluster	DAI0	DAI3	DAI6	DAI9	DAI12	tairID	tairName
TraesCS3A02G433200	CK	Cytokinin signaling	C4	1.74489	7.12987	6.96691	9.63893	12.1697	AT1G27320	AHK3
TraesCS3B02G469000	CK	Cytokinin signaling	C3	0.957542	7.51232	5.82063	10.1746	12.3479	AT1G27320	AHK3
TraesCS3D02G426600	CK	Cytokinin signaling	C3	2.65654	9.57486	9.25008	13.3776	15.6282	AT1G27320	AHK3
TraesCS6A02G312500	CK	Cytokinin signaling	C5	5.38824	5.69122	4.27411	4.28249	5.24402	AT2G01830	AHK4
TraesCS1A02G156600	Auxin	Auxin signaling	C2	2.56189	12.878	67.8242	54.6011	36.3984	AT2G28350;AT4G30080	ARF10;ARF16
TraesCS1B02G173700	Auxin	Auxin signaling	C2	0.926394	3.17766	16.7219	15.5488	10.547	AT2G28350;AT4G30080	ARF10;ARF16
TraesCS1B02G347900	Auxin	Auxin signaling	C5	6.84964	10.5418	7.89554	6.18896	5.34217	AT2G33860	ARF3
TraesCS1B02G424700	Auxin	Auxin signaling	C2	8.86303	12.3086	33.7606	22.0986	21.9792	AT2G33860	ARF3
TraesCS1D02G155100	Auxin	Auxin signaling	C2	2.06723	5.83708	40.4718	32.3686	17.3203	AT2G28350;AT4G30080	ARF10;ARF16
TraesCS1D02G337400	Auxin	Auxin signaling	C5	15.882	20.4082	12.9205	8.46358	7.64846	AT2G33860	ARF3
TraesCS2A02G491000	Auxin	Auxin signaling	C2	4.23545	4.72354	11.6585	8.13665	10.2961	AT1G19850	ARF5
TraesCS2A02G547800	Auxin	Auxin signaling	C4	3.48476	1.7507	2.86967	3.75535	3.72925	AT5G37020	ARF8
TraesCS2B02G519200	Auxin	Auxin signaling	C2	2.15436	2.07025	5.67894	5.47572	5.43124	AT1G19850	ARF5
TraesCS2D02G491200	Auxin	Auxin signaling	C4	4.63337	3.02862	7.56432	7.99505	8.65674	AT1G19850	ARF5
TraesCS2D02G548900	Auxin	Auxin signaling	C4	0.602196	0.661571	1.59127	2.39184	2.95556	AT5G37020	ARF8
TraesCS3D02G245400	Auxin	Auxin signaling	C2	2.13207	1.90998	5.43332	3.52873	2.65542	AT2G33860	ARF3
TraesCS6B02G167100	Auxin	Auxin signaling	C2	1.42544	3.89157	11.1314	7.77806	6.9262	AT1G30330	ARF6
TraesCS6D02G127600	Auxin	Auxin signaling	C2	1.54082	4.86467	11.5898	9.33697	8.50308	AT1G30330	ARF6
TraesCS7A02G160800	Auxin	Auxin signaling	C2	4.72846	2.19316	16.2839	13.6421	9.99407	AT1G19220;AT5G20730	ARF19;NPH4
TraesCS7A02G446900	Auxin	Auxin signaling	C3	2.41566	3.31223	10.8704	24.6552	13.3998	AT2G28350;AT4G30080	ARF10;ARF16
TraesCS7A02G461700	Auxin	Auxin signaling	C6	4.10271	29.0586	27.6544	18.8273	16.6621	AT1G30330	ARF6
TraesCS7B02G065800	Auxin	Auxin signaling	C3	5.0149	1.52189	11.9471	13.8327	10.7379	AT1G19220;AT5G20730	ARF19;NPH4
TraesCS7B02G346700	Auxin	Auxin signaling	C3	3.82555	3.42978	11.0964	16.1449	11.1993	AT2G28350;AT4G30080	ARF10;ARF16
TraesCS7D02G161900	Auxin	Auxin signaling	C2	3.39194	1.51333	13.0121	12.1221	8.71926	AT1G19220;AT5G20730	ARF19;NPH4
TraesCS7D02G436800	Auxin	Auxin signaling	C3	4.58022	6.09812	9.70796	15.4957	11.0339	AT2G28350;AT4G30080	ARF10;ARF16
TraesCS7D02G449900	Auxin	Auxin signaling	C6	5.09014	39.1273	33.5942	29.6998	31.9355	AT1G30330	ARF6
TraesCS1A02G082700	Auxin	Auxin signaling	C5	0.0499841	4.55268	1.21405	0.256846	0.235098	AT3G17600	IAA31
TraesCS1A02G118400	Auxin	Auxin signaling	C5	13.9229	138.806	40.6972	54.0699	52.1876	AT1G80390	IAA15
TraesCS1A02G343300	Auxin	Auxin signaling	C6	0.990331	11.0577	3.64123	7.35719	7.20824	AT1G51950;AT3G16500	IAA18;IAA26
TraesCS1A02G390200	Auxin	Auxin signaling	C4	9.77162	14.2587	18.7733	25.1604	34.2496	AT4G29080	IAA27
TraesCS1B02G138100	Auxin	Auxin signaling	C5	18.6291	181.581	62.271	96.8316	85.9304	AT1G80390	IAA15
TraesCS1B02G418400	Auxin	Auxin signaling	C2	39.2286	27.1656	45.6727	42.3853	47.167	AT4G29080	IAA27
TraesCS1D02G119500	Auxin	Auxin signaling	C5	17.3006	189.509	56.7783	77.6944	59.5518	AT1G80390	IAA15
TraesCS1D02G398400	Auxin	Auxin signaling	C4	39.5159	22.3729	43.3118	43.1129	57.253	AT4G29080	IAA27
TraesCS3A02G108400	Auxin	Auxin signaling	C4	0.0645982	0.619419	2.63175	7.04238	11.8346	AT5G25890	IAA28
TraesCS3A02G276500	Auxin	Auxin signaling	C4	0.762984	3.05791	1.93895	12.3595	14.9874	AT1G51950;AT3G16500	IAA18;IAA26
TraesCS3B02G310500	Auxin	Auxin signaling	C4	1.01915	5.19145	3.02024	11.5385	14.473	AT1G51950;AT3G16500	IAA18;IAA26
TraesCS3D02G276600	Auxin	Auxin signaling	C4	0.923962	7.13028	6.13048	14.6944	17.1393	AT1G51950;AT3G16500	IAA18;IAA26
TraesCS5A02G058600	Auxin	Auxin signaling	C3	13.3331	12.8607	25.2193	45.0224	40.1291	AT1G04250;AT3G04730;AT3G23050;AT4G14550	IAA17;IAA16;IAA7;IAA14
TraesCS5A02G317200	Auxin	Auxin signaling	C2	0.0523625	1.38369	13.643	8.05212	4.46691	AT1G04240;AT3G23030;AT4G14560;AT5G43700	SHY2;IAA2;IAA1;IAA4
TraesCS5A02G378200	Auxin	Auxin signaling	C4	6.6137	6.76801	47.8834	71.0187	80.1901	AT1G04240;AT3G23030;AT4G14560;AT5G43700	SHY2;IAA2;IAA1;IAA4
TraesCS5A02G378300	Auxin	Auxin signaling	C3	9.5962	15.7455	21.0611	41.8171	32.333	AT1G04250;AT3G04730;AT3G23050;AT4G14550	IAA17;IAA16;IAA7;IAA14
TraesCS5B02G058500	Auxin	Auxin signaling	C4	17.6561	22.0122	23.3981	55.2307	60.4397	AT1G04250;AT3G04730;AT3G23050;AT4G14550	IAA17;IAA16;IAA7;IAA14
TraesCS5B02G058800	Auxin	Auxin signaling	C4	0.290711	2.03848	3.78167	10.6478	20.4817	AT1G04240;AT3G23030;AT4G14560;AT5G43700	SHY2;IAA2;IAA1;IAA4
TraesCS5B02G381800	Auxin	Auxin signaling	C3	4.18709	2.76796	60.6564	144.507	137.124	AT1G04240;AT3G23030;AT4G14560;AT5G43700	SHY2;IAA2;IAA1;IAA4
TraesCS5D02G069300	Auxin	Auxin signaling	C3	16.453	27.2823	57.5883	97.7833	91.7541	AT1G04250;AT3G04730;AT3G23050;AT4G14550	IAA17;IAA16;IAA7;IAA14
TraesCS5D02G388200	Auxin	Auxin signaling	C3	1.92164	2.69598	63.8663	141.011	127.598	AT1G04240;AT3G23030;AT4G14560;AT5G43700	SHY2;IAA2;IAA1;IAA4
TraesCS5D02G388300	Auxin	Auxin signaling	C3	0.221098	3.14364	16.0914	54.2574	41.0758	AT1G04250;AT3G04730;AT3G23050;AT4G14550	IAA17;IAA16;IAA7;IAA14
TraesCS6A02G392600	Auxin	Auxin signaling	C3	1.83341	3.99094	8.04096	10.8838	9.53682	AT1G04100;AT4G28640	IAA10;IAA11
TraesCS6B02G432800	Auxin	Auxin signaling	C4	7.71726	11.031	20.8196	23.6322	27.9386	AT1G04100;AT4G28640	IAA10;IAA11
TraesCS6D02G378300	Auxin	Auxin signaling	C6	8.58086	33.4141	23.7686	26.809	17.016	AT1G04100;AT4G28640	IAA10;IAA11
TraesCS7A02G371500	Auxin	Auxin signaling	C4	0.208626	0.631647	2.09956	1.96138	3.17624	AT1G80390	IAA15
TraesCS7B02G256100	Auxin	Auxin signaling	C4	0.635994	0	6.52708	3.76774	8.1005	AT1G80390	IAA15
TraesCS7D02G351400	Auxin	Auxin signaling	C4	0.685786	0	5.34014	3.68939	9.43305	AT1G80390	IAA15
TraesCS1A02G077800	Auxin	Auxin transporter	C4	4.588	5.9641	21.4017	35.7335	72.8805	AT2G21050	LAX2
TraesCS1B02G095900	Auxin	Auxin transporter	C4	3.59284	7.29656	21.3421	23.6381	52.2489	AT2G21050	LAX2
TraesCS1D02G079900	Auxin	Auxin transporter	C4	7.40496	6.32643	51.8238	51.2787	93.7659	AT2G21050	LAX2
TraesCS3A02G369200	Auxin	Auxin transporter	C3	4.56652	48.8456	48.7406	82.9606	53.2261	AT5G01240	LAX1
TraesCS3B02G401000	Auxin	Auxin transporter	C3	2.63545	13.4868	13.1171	28.7482	19.6767	AT5G01240	LAX1
TraesCS3D02G362100	Auxin	Auxin transporter	C3	2.49211	5.00295	9.92664	25.0618	18.6436	AT5G01240	LAX1
TraesCS4A02G070500	Auxin	Auxin transporter	C4	2.50697	6.58864	4.0885	6.08212	11.8234	AT2G21050	LAX2
TraesCS4B02G226500	Auxin	Auxin transporter	C4	3.51281	3.75667	0.649486	4.10704	7.86192	AT2G21050	LAX2
TraesCS6A02G146200	CK	Cytokinin signaling	C4	25.5864	10.6739	20.9144	38.1658	41.0234	AT2G25180;AT4G31920	ARR12;ARR10
TraesCS6B02G174400	CK	Cytokinin signaling	C4	25.0327	9.92313	19.147	32.3733	35.7365	AT2G25180;AT4G31920	ARR12;ARR10
TraesCS2B02G234300	CK	Cytokinin transporters	C5	0.607659	2.17211	1.43424	0.601541	0.390161	AT3G09990	ENT2
TraesCS2D02G214500	CK	Cytokinin transporters	C5	2.25403	2.96746	1.56083	1.67731	1.0242	AT3G09990	ENT2
TraesCS2B02G276300	CK	Cytokinin biosynthesis	C4	2.93377	6.33874	7.15571	10.6972	14.0106	AT2G27760	IPT2
TraesCS7A02G560300	CK	Cytokinin biosynthesis	C5	0.40578	1.90523	1.34459	0.89017	0.884004	AT5G20040	ATIPT9
TraesCS7D02G549300	CK	Cytokinin biosynthesis	C5	0.42819	1.61182	1.26248	0.789975	0.497564	AT5G20040	ATIPT9
TraesCS3A02G211100	CK	Cytokinin biosynthesis	C6	0.0826076	1.14568	0.282759	0.650472	0.810109	AT5G06300	LOG7
TraesCS3A02G251500	CK	Cytokinin biosynthesis	C5	7.42831	19.9644	7.88701	5.45313	4.2251	AT5G11950;AT5G26140	LOG8;LOG9
TraesCS3B02G241600	CK	Cytokinin biosynthesis	C4	0	0.405828	0.297028	0.937304	2.50727	AT5G06300	LOG7
TraesCS3B02G281000	CK	Cytokinin biosynthesis	C5	1.99555	11.5037	6.17283	4.46503	3.49424	AT5G11950;AT5G26140	LOG8;LOG9
TraesCS3D02G251900	CK	Cytokinin biosynthesis	C5	4.76573	18.3555	11.696	8.01983	9.2606	AT5G11950;AT5G26140	LOG8;LOG9
TraesCS4A02G318100	CK	Cytokinin biosynthesis	C5	0.255388	1.32114	0.397681	0.809034	0.65282	AT2G35990	LOG2
TraesCS4B02G313800	CK	Cytokinin biosynthesis	C3	0.0432902	0.314512	0.264301	1.77279	1.70964	AT5G03270	LOG6
TraesCS5D02G568500	CK	Cytokinin biosynthesis	C4	2.0684	2.11297	1.06148	2.70903	2.98809	AT2G35990	LOG2
TraesCS1A02G081300	Auxin	Auxin transporter	C6	9.46431	34.5467	22.9469	24.8069	22.6148	AT1G02520;AT1G02530;AT2G47000;AT3G62150;AT4G01820;AT4G01830	ABCB11;ABCB12;ABCB4;ABCB21;ABCB3;ABCB5
TraesCS1B02G099000	Auxin	Auxin transporter	C5	9.12806	23.4504	12.0721	14.9504	12.6771	AT1G02520;AT1G02530;AT2G47000;AT3G62150;AT4G01820;AT4G01830	ABCB11;ABCB12;ABCB4;ABCB21;ABCB3;ABCB5
TraesCS2B02G341800	Auxin	Auxin transporter	C2	8.8462	16.5744	32.0099	23.0498	21.2243	AT3G28860	ABCB19
TraesCS6A02G171800	Auxin	Auxin transporter	C3	3.43787	7.23259	11.0451	25.3612	13.6638	AT3G28345;AT3G28360;AT3G28380;AT3G28390;AT3G28415	ABCB15;ABCB16;ABCB17;ABCB18;ABCB22
TraesCS6D02G161200	Auxin	Auxin transporter	C3	0.449287	2.07745	3.85264	11.7725	7.32755	AT3G28345;AT3G28360;AT3G28380;AT3G28390;AT3G28415	ABCB15;ABCB16;ABCB17;ABCB18;ABCB22
TraesCS7A02G284900	Auxin	Auxin transporter	C5	4.46608	17.3282	9.43686	8.90991	5.34807	AT2G36910	ABCB1
TraesCS7B02G181700	Auxin	Auxin transporter	C3	1.49688	3.19706	3.94622	5.57058	6.12557	AT2G36910	ABCB1
TraesCS7D02G284100	Auxin	Auxin transporter	C6	1.21961	3.55095	2.91583	4.30154	3.71496	AT2G36910	ABCB1
TraesCS3D02G221900	Auxin	Auxin transporter	C3	2.94629	3.42479	19.0339	29.1659	13.7447	AT1G23080;AT1G70940;AT2G01420	PIN7;PIN3;PIN4
TraesCS6A02G308600	Auxin	Auxin transporter	C4	2.24716	2.95907	24.3862	36.0433	45.4895	AT1G73590	PIN1
TraesCS6D02G287800	Auxin	Auxin transporter	C3	12.5545	4.10647	51.0044	72.4652	64.8334	AT1G73590	PIN1
TraesCS7D02G478800	Auxin	Auxin transporter	C4	0.0989774	0.0780457	0.089397	1.22759	1.41304	AT5G57090	PIN2
TraesCS5A02G429100	CK	Cytokinin transporters	C6	0	2.0419	1.07967	1.39621	0.819386	AT1G28220;AT1G28230;AT2G33750	PUP3;PUP1;PUP2
TraesCS5B02G431200	CK	Cytokinin transporters	C5	0.0300414	5.09617	3.08854	1.74382	1.60525	AT1G28220;AT1G28230;AT2G33750	PUP3;PUP1;PUP2
TraesCS5D02G437200	CK	Cytokinin transporters	C5	0	11.727	4.61102	3.43465	2.51843	AT1G28220;AT1G28230;AT2G33750	PUP3;PUP1;PUP2
TraesCS6D02G243400	CK	Cytokinin transporters	C5	0.994922	21.3367	10.2274	10.0205	6.19567	AT1G09860;AT1G19770;AT1G44750;AT1G47603;AT1G57943;AT1G57980;AT1G57990;AT1G75470;AT4G08700;AT5G41160	PUP16;PUP14;PUP11;ATPUP19;PUP17;PUP23;PUP18;PUP15;PUP13;ATPUP12
TraesCS1A02G091300	Auxin	Auxin signaling	C3	9.72275	27.8261	42.9704	47.456	53.3798	AT3G62980;AT4G03190	TIR1;GRH1
TraesCS2A02G286200	Auxin	Auxin signaling	C4	20.2738	24.9013	44.9343	73.6094	110.66	AT1G12820;AT3G26810	AFB3;AFB2
TraesCS4A02G001800	Auxin	Auxin signaling	C2	1.54764	2.45297	6.10329	5.28013	6.24457	AT4G24390;AT5G49980	FBX14;AFB5
TraesCS4D02G301800	Auxin	Auxin signaling	C4	0.818912	1.43723	4.49337	5.15332	7.30611	AT4G24390;AT5G49980	FBX14;AFB5
TraesCS2D02G012100	Auxin	Auxin biosynthesis	C4	0.148727	0	0.60156	3.77868	5.70636	AT1G04610;AT2G33230	YUC3;YUC7
TraesCS3D02G030500	Auxin	Auxin biosynthesis	C5	0.0286477	1.2086	0.171837	0.299182	0.579555	AT1G04180;AT4G28720;AT5G43890	YUC9;YUC8;YUC5
TraesCS7A02G495800	Regeneration	Regeneration factor	C4	1.14409	1.80662	15.7858	15.6204	18.3489	AT5G57390	AIL5
TraesCS7B02G401400	Regeneration	Regeneration factor	C3	5.07833	2.70857	35.9737	41.6841	44.5696	AT5G57390	AIL5
TraesCS7D02G483200	Regeneration	Regeneration factor	C2	3.97661	8.07675	39.0355	35.0243	37.2034	AT5G57390	AIL5
TraesCS1B02G192200	Regeneration	Regeneration factor	C5	0.0388411	1.76661	0.0310401	0.0342369	0.0311432	AT1G32510;AT4G17980;AT5G46590	ANAC011;anac071;anac096
TraesCS1D02G194200	Regeneration	Regeneration factor	C5	0	7.6272	1.36074	1.54695	0.894553	AT1G32510;AT4G17980;AT5G46590	ANAC011;anac071;anac096
TraesCS3A02G413200	Regeneration	Regeneration factor	C5	1.27841	8.73963	2.13429	1.49112	1.38271	AT2G22160;AT3G48340;AT3G48350;AT5G50260	AT2G22160;CEP2;CEP3;CEP1
TraesCS3B02G447400	Regeneration	Regeneration factor	C5	0.377439	217.922	25.5653	27.0382	9.4411	AT2G22160;AT3G48340;AT3G48350;AT5G50260	AT2G22160;CEP2;CEP3;CEP1
TraesCS3D02G407700	Regeneration	Regeneration factor	C5	0.376982	13.8466	1.4914	0.802818	0.598342	AT2G22160;AT3G48340;AT3G48350;AT5G50260	AT2G22160;CEP2;CEP3;CEP1
TraesCS7D02G419400	Regeneration	Regeneration factor	C4	0.319502	0.130139	0.134722	0.475025	1.46758	AT1G65310;AT2G18800;AT4G25810;AT4G30270;AT4G30280;AT4G30290;AT5G48070;AT5G57550;AT5G57560	ATXTH17;XTH21;XTH23;XTH24;XTH18;XTH19;XTH20;XTH25;XTH22
TraesCS3A02G395500	Regeneration	Regeneration factor	C2	0.0934372	0.105429	37.5568	33.0513	31.6163	AT5G17430	BBM
TraesCS3B02G427300	Regeneration	Regeneration factor	C2	0.0262596	0.0302631	32.3831	31.0914	30.5298	AT5G17430	BBM
TraesCS3D02G389100	Regeneration	Regeneration factor	C2	0.207094	0.312775	59.6598	47.6331	42.4715	AT5G17430	BBM
TraesCS6A02G229500	Regeneration	Regeneration factor	C4	0.387903	0.0123357	7.22419	12.8572	17.871	AT5G17430	BBM
TraesCS3B02G561200	Regeneration	Cell cycle	C4	25.7645	16.1422	23.8002	28.5399	23.7949	AT5G10270;AT5G64960	CDKC-1;CDKC-2
TraesCS4B02G311000	Regeneration	Cell cycle	C4	54.7532	36.1383	66.2528	67.1062	74.8875	AT2G27960	CKS1
TraesCS3B02G183400	Regeneration	Cell cycle	C2	6.03947	3.92581	15.724	10.0588	7.38977	AT1G44110;AT1G77390	CYCA1-1;CYCA1-2
TraesCS3D02G164600	Regeneration	Cell cycle	C2	9.00975	3.85978	15.8174	9.83712	8.87372	AT1G44110;AT1G77390	CYCA1-1;CYCA1-2
TraesCS5B02G114300	Regeneration	Cell cycle	C3	2.02442	1.79376	8.37537	10.2306	10.0245	AT1G15570;AT1G80370	CYCA2-3;CYCA2-4
TraesCS4B02G078300	Regeneration	Cell cycle	C2	6.3403	6.95066	15.9951	9.99535	12.1447	AT1G47210;AT1G47220;AT1G47230;AT5G43080	CYCA3-2;CYCA3-3;CYCA3-4;CYCA3-1
TraesCS5B02G078200	Regeneration	Cell cycle	C4	9.84688	5.42241	9.90703	10.1277	10.5276	AT1G47210;AT1G47220;AT1G47230;AT5G43080	CYCA3-2;CYCA3-3;CYCA3-4;CYCA3-1
TraesCS1B02G321000	Regeneration	Cell cycle	C2	4.67957	1.69751	12.7992	9.91489	8.16496	AT1G34460;AT2G26760;AT3G11520;AT4G37490;AT5G06150	CYCB1;5;CYCB1-4;CYCB1-3;CYCB1-1;CYCB1-2
TraesCS3A02G333000	Regeneration	Cell cycle	C2	36.0836	14.1226	71.8483	42.5237	33.4783	AT1G34460;AT2G26760;AT3G11520;AT4G37490;AT5G06150	CYCB1;5;CYCB1-4;CYCB1-3;CYCB1-1;CYCB1-2
TraesCS3B02G363200	Regeneration	Cell cycle	C2	31.1653	13.6783	63.9219	35.9839	29.232	AT1G34460;AT2G26760;AT3G11520;AT4G37490;AT5G06150	CYCB1;5;CYCB1-4;CYCB1-3;CYCB1-1;CYCB1-2
TraesCS3D02G326600	Regeneration	Cell cycle	C2	35.6806	11.6264	61.8337	35.2659	31.3976	AT1G34460;AT2G26760;AT3G11520;AT4G37490;AT5G06150	CYCB1;5;CYCB1-4;CYCB1-3;CYCB1-1;CYCB1-2
TraesCS2A02G404800	Regeneration	Cell cycle	C2	12.1769	4.98457	28.4283	19.5224	17.8531	AT2G17620;AT4G35620	CYCB2-1;CYCB2-2
TraesCS2B02G422800	Regeneration	Cell cycle	C2	16.0095	5.9619	26.5883	19.4341	18.4295	AT2G17620;AT4G35620	CYCB2-1;CYCB2-2
TraesCS2D02G401700	Regeneration	Cell cycle	C2	17.6763	7.5097	32.2116	27.1908	20.9301	AT2G17620;AT4G35620	CYCB2-1;CYCB2-2
TraesCS7D02G536000	Regeneration	Cell cycle	C2	16.8584	5.30998	45.7036	27.5389	16.8899	AT2G17620;AT4G35620	CYCB2-1;CYCB2-2
TraesCS5D02G206200	Regeneration	Cell cycle	C4	1.48339	0.50784	1.60717	2.55811	3.72446	AT1G70210	CYCD1-1
TraesCS5A02G246800	Regeneration	Cell cycle	C3	3.62565	5.50875	14.1242	34.1166	34.4699	AT2G22490;AT5G10440;AT5G65420	CYCD2;1;CYCD4-2;CYCD4;1
TraesCS5A02G247000	Regeneration	Cell cycle	C4	0.0979885	1.12083	26.4676	35.6972	49.5709	AT2G22490;AT5G10440;AT5G65420	CYCD2;1;CYCD4-2;CYCD4;1
TraesCS5B02G243900	Regeneration	Cell cycle	C4	9.70842	9.96252	27.3559	40.0762	58.2708	AT2G22490;AT5G10440;AT5G65420	CYCD2;1;CYCD4-2;CYCD4;1
TraesCS5B02G244100	Regeneration	Cell cycle	C4	0.915892	0.873708	2.72396	5.99168	7.67475	AT2G22490;AT5G10440;AT5G65420	CYCD2;1;CYCD4-2;CYCD4;1
TraesCS4A02G234600	Regeneration	Cell cycle	C6	3.42739	17.2744	19.5639	12.3163	9.4987	AT4G37630	CYCD5-1
TraesCS6A02G274000	Regeneration	Regeneration factor	C5	5.15576	62.9091	7.14786	0.778914	0.564302	AT5G62940	DOF5.6
TraesCS6B02G301500	Regeneration	Regeneration factor	C5	2.99589	42.5242	4.05071	0.443261	0.450979	AT5G62940	DOF5.6
TraesCS6D02G254200	Regeneration	Regeneration factor	C5	5.53129	46.8675	6.04746	0.56579	0.688719	AT5G62940	DOF5.6
TraesCS2D02G295300	Regeneration	Cell cycle	C6	0.827447	3.06188	3.2015	2.0201	2.04672	AT2G36010;AT5G22220	E2F3;E2FB
TraesCS5D02G133600	Regeneration	Cell cycle	C6	2.58248	5.96255	8.03308	6.38022	6.56178	AT2G36010;AT5G22220	E2F3;E2FB
TraesCS4A02G035400	Regeneration	Regeneration factor	C2	5.06142	13.0689	21.0139	6.55041	5.42601	AT1G36060	ERF055
TraesCS4B02G268100	Regeneration	Regeneration factor	C6	1.80254	11.7724	14.4247	5.83784	5.26096	AT1G36060	ERF055
TraesCS4D02G267500	Regeneration	Regeneration factor	C6	1.01564	3.77919	4.88883	3.24177	3.84073	AT1G36060	ERF055
TraesCS2D02G286300	Regeneration	Regeneration factor	C6	0.183418	12.2659	8.09179	7.45381	8.28397	AT5G13330	ERF113
TraesCS1B02G168900	Regeneration	Cell cycle	C4	8.74613	4.11308	6.65994	8.10055	13.0602	AT3G24810;AT5G48820	KRP5;KRP3
TraesCS4D02G332500	Regeneration	Cell cycle	C3	3.30154	8.52301	8.12835	10.8248	11.9934	AT3G24810;AT5G48820	KRP5;KRP3
TraesCS7A02G457200	Regeneration	Regeneration factor	C3	1.51586	2.08858	3.29051	5.21123	4.4315	AT1G58200	MSL3
TraesCS7D02G445800	Regeneration	Regeneration factor	C3	1.33009	1.26711	2.57075	3.25463	2.5552	AT1G58200	MSL3
TraesCS7A02G464100	Regeneration	Regeneration factor	C6	0.409593	13.2229	7.24733	17.7268	7.74906	AT1G56010;AT3G12977	NAC021;AT3G12977
TraesCS7B02G162700	Regeneration	Cell cycle	C6	1.85432	9.25921	9.05242	6.47723	7.7468	AT3G12280	RBR1
TraesCS4B02G385200	Regeneration	Regeneration factor	C3	1.17638	2.08424	4.10923	3.95698	4.29522	AT5G60690	REV
TraesCS5A02G549700	Regeneration	Regeneration factor	C4	1.48684	2.18887	2.06238	4.1583	5.55929	AT5G60690	REV
TraesCS5A02G144000	Regeneration	Regeneration factor	C3	0.141221	5.41586	11.5246	12.9275	13.568	AT3G54220	SCR
TraesCS5B02G143100	Regeneration	Regeneration factor	C6	0.581689	6.28124	11.792	11.2185	11.5517	AT3G54220	SCR
TraesCS5D02G148000	Regeneration	Regeneration factor	C3	0.601914	5.14917	11.1265	10.4984	11.7585	AT3G54220	SCR
TraesCS6D02G082400	Regeneration	Cell cycle	C2	3.40942	3.56138	7.80154	7.30587	8.34896	AT1G02970	WEE1
TraesCS2A02G100700	Regeneration	Regeneration factor	C5	13.5827	62.2248	12.5126	10.9872	12.5238	AT3G03660;AT5G17810	WOX11;WOX12
TraesCS2B02G117900	Regeneration	Regeneration factor	C5	13.35	58.9473	20.4427	23.358	19.2503	AT3G03660;AT5G17810	WOX11;WOX12
TraesCS2D02G100200	Regeneration	Regeneration factor	C5	24.5976	112.94	30.1471	24.6122	22.8623	AT3G03660;AT5G17810	WOX11;WOX12
TraesCS3D02G361100	Regeneration	Regeneration factor	C4	0.0267813	3.50427	27.9422	16.9688	33.3588	AT3G11260;AT5G05770	WOX5;WOX7

## Sheet: Table S10
Table S10. Predicted ARR target genes.
GeneID	RNA.cluster	DAI0	DAI3	DAI6	DAI9	DAI12
TraesCS5A02G110600	C4	8.73363	8.74006	11.7615	18.0069	23.4296
TraesCS7A02G496200	C3	0.413554	1.87248	1.61014	3.16182	1.4421
TraesCS4A02G036200	C3	0.165832	0.602153	0.293728	2.29754	0.758768
TraesCS4B02G269200	C3	0.303736	1.07911	1.28976	4.35107	1.64998
TraesCS4A02G001500	C4	0.62783	1.41298	1.30934	2.00205	3.06957
TraesCS7A02G333400	C3	0.159836	0.548817	0.296339	1.16115	1.21796
TraesCS5A02G427900	C3	0.253388	0.24557	0.384317	2.29543	1.86693
TraesCS5A02G428200	C3	0.0252335	3.61417	24.5834	33.8317	24.7405
TraesCS5B02G430100	C3	0.124535	6.84755	33.9274	51.8555	42.255
TraesCS5D02G436200	C3	3.63932	12.5268	25.4355	52.7803	43.8599
TraesCS5B02G095400	C4	0.160975	0.296284	0.907025	1.87447	2.44255
TraesCS1D02G248900	C4	9.63669	12.3076	17.9279	24.0934	27.7246
TraesCS7B02G181700	C3	1.49688	3.19706	3.94622	5.57058	6.12557
TraesCS6A02G171800	C3	3.43787	7.23259	11.0451	25.3612	13.6638
TraesCS2B02G311700	C2	1.53165	2.75789	4.98085	3.31926	3.35546
TraesCS7D02G116300	C3	0.355501	1.9475	2.37495	4.71256	3.90351
TraesCS1B02G157900	C3	0.439621	0.867709	0.923121	1.82318	1.21804
TraesCS4B02G315100	C3	0.0233085	0.365649	0.570583	1.12238	0.825227
TraesCS7D02G171300	C3	7.12199	27.2578	25.8972	45.1998	35.254
TraesCS6B02G233400	C4	0.598913	3.44451	3.35587	4.75437	6.10951
TraesCS5D02G080700	C3	7.01492	6.89666	14.7067	16.7545	13.5182
TraesCS6D02G142400	C2	7.63817	3.80595	7.74103	7.05472	6.02353
TraesCS2B02G107400	C3	0.626192	0.128292	6.80044	9.63987	8.07722
TraesCS2D02G091700	C2	0.144327	0.144531	4.82901	3.96718	2.86114
TraesCS7A02G315200	C4	5.84693	13.2275	26.7063	28.2715	37.8772
TraesCS7B02G215700	C4	8.56068	8.72425	22.2214	22.1797	31.6998
TraesCS7D02G312200	C2	8.63547	8.20307	42.6211	36.4356	41.752
TraesCS1A02G036100	C4	2.43259	2.19719	3.57805	4.41754	5.25641
TraesCS6D02G376900	C3	9.93723	21.5548	22.3642	33.9486	25.0922
TraesCS4A02G202200	C4	21.7341	3.03037	13.37	24.1664	33.8033
TraesCS4B02G106500	C4	0.307514	0.373114	1.44389	10.1421	14.5852
TraesCS5D02G169500	C2	3.63076	6.24235	12.5363	10.529	10.1012
TraesCS4B02G288100	C4	2.27549	7.25276	6.94758	10.1722	13.2728
TraesCS3A02G198400	C2	0.983673	0.487404	1.04749	1.25933	0.872787
TraesCS3B02G469000	C3	0.957542	7.51232	5.82063	10.1746	12.3479
TraesCS4D02G050400	C4	5.97541	3.1449	4.55415	9.71679	11.3096
TraesCS7B02G405100	C3	0.866816	0.997458	1.86134	5.04054	4.14296
TraesCS7D02G485500	C3	0.742046	0.581401	2.08325	4.53995	3.32255
TraesCS7A02G248500	C3	11.4152	19.9002	29.4389	33.0094	36.6001
TraesCS5D02G199600	C4	0.0632303	0.122836	0.884045	1.87339	2.16173
TraesCS5A02G255900	C3	0.0357855	0.0292769	2.15642	6.50177	5.92986
TraesCS2A02G172100	C3	17.3826	11.6969	20.8173	26.0915	24.1521
TraesCS2B02G198500	C4	4.6587	3.1151	4.15122	6.32903	5.69495
TraesCS1B02G272800	C4	39.5893	28.4041	38.1033	47.0781	68.3549
TraesCS4B02G088200	C4	41.4162	23.7451	43.9605	46.6214	52.9129
TraesCS6A02G371100	C4	108.179	41.63	53.6782	92.9816	102.191
TraesCS3A02G212300	C3	0.0371854	0.0141301	0.535848	6.78094	3.37732
TraesCS4B02G098300	C3	5.80934	15.7027	19.0801	41.2989	20.7009
TraesCS2D02G362200	C3	1.69831	5.57599	10.9764	12.3992	9.06233
TraesCS2A02G587900	C3	0.293599	0.0996601	0.249295	1.38549	0.758595
TraesCS3D02G534100	C3	0	1.52784	0.564856	2.19365	2.37173
TraesCS2A02G562400	C4	0.549628	1.41049	0.575397	0.90697	1.79291
TraesCS2B02G603900	C4	1.6897	1.8709	1.2549	2.7157	2.59474
TraesCS3B02G383400	C4	0.0136714	0.705691	0.294626	2.73293	4.90195
TraesCS4B02G319000	C4	7.5487	5.19471	6.15146	7.96207	9.51764
TraesCS5A02G500500	C4	0	0	0.840326	1.0706	1.36775
TraesCS6A02G208900	C3	4.13668	6.02254	13.9377	15.6471	17.1211
TraesCS1B02G092400	C3	0.234044	0.914853	0.966747	1.53135	1.29075
TraesCS5A02G200800	C2	4.38105	4.05794	17.8864	12.1445	8.62406
TraesCS2A02G337900	C2	0.0202153	1.67697	6.38584	6.99499	3.25513
TraesCS2B02G344000	C3	0.261674	2.11438	5.30753	8.83	4.05591
TraesCS6A02G292300	C3	7.40846	0.365685	1.90155	12.219	7.52295
TraesCS6B02G322700	C3	1.61057	0.175741	2.28281	18.6511	11.768
TraesCS5D02G159800	C4	0.358987	1.31914	2.17515	2.64609	3.61992
TraesCS6B02G296400	C2	0.244241	0.629561	4.78006	0.606333	0.370983
TraesCS6D02G245800	C2	0.315291	0.22259	2.23201	1.18553	1.09166
TraesCS2B02G542400	C3	0.684422	7.01382	8.32959	11.4343	10.4093
TraesCS2D02G515800	C4	0.067013	0.409231	0.593458	1.54835	1.80845
TraesCS4D02G232400	C2	0.263481	0.939971	1.50359	1.01632	0.718113
TraesCS3D02G535700	C4	2.68036	6.10625	8.90251	18.4903	20.4884
TraesCS4B02G207500	C3	1.97715	5.54084	1.74315	6.69698	7.10271
TraesCS4D02G208400	C3	2.65204	6.82113	2.24749	9.89974	8.10591
TraesCS5D02G392300	C3	36.8722	46.8065	97.3087	116.292	107.193
TraesCS2B02G377500	C4	0.0274494	0.0647288	0	0.132328	1.13302
TraesCS1A02G122200	C4	0.151885	1.43125	1.35581	1.83516	2.6883
TraesCS1B02G347000	C2	8.98013	17.427	43.1082	29.3946	30.298
TraesCS1A02G156600	C2	2.56189	12.878	67.8242	54.6011	36.3984
TraesCS7A02G446900	C3	2.41566	3.31223	10.8704	24.6552	13.3998
TraesCS7B02G346700	C3	3.82555	3.42978	11.0964	16.1449	11.1993
TraesCS7D02G436800	C3	4.58022	6.09812	9.70796	15.4957	11.0339
TraesCS3B02G293000	C4	13.2129	6.57094	9.53223	12.2476	14.3374
TraesCS2A02G251300	C3	0.384021	1.77853	1.98558	3.6246	2.68142
TraesCS6B02G167100	C2	1.42544	3.89157	11.1314	7.77806	6.9262
TraesCS2A02G547800	C4	3.48476	1.7507	2.86967	3.75535	3.72925
TraesCS4B02G071800	C4	2.20314	2.1883	3.54892	4.74206	6.14159
TraesCS2B02G040300	C4	6.31488	5.55291	10.1158	11.8165	13.4043
TraesCS2B02G582300	C4	1.24626	0.154588	0.37414	1.27096	2.81287
TraesCS2D02G552200	C4	0.496791	0.0564118	0.911593	2.02736	4.19494
TraesCS4B02G214500	C4	13.9645	11.4633	10.5914	14.446	15.5555
TraesCS4A02G127000	C3	1.55547	1.25166	2.3958	7.8644	5.76
TraesCS1D02G129000	C3	10.3007	19.6165	27.4664	27.8087	32.2746
TraesCS5B02G285800	C3	0.999463	2.32086	2.28575	4.55449	4.41455
TraesCS7D02G270700	C3	1.33128	0.366785	1.96396	2.96764	1.79581
TraesCS7B02G247600	C4	1.47147	0.749129	0.758981	3.83731	7.37025
TraesCS7D02G343700	C4	1.71422	1.0742	0.383231	1.5022	2.86209
TraesCS7D02G299700	C4	4.27855	4.84095	5.95405	9.16858	11.6137
TraesCS2A02G371000	C3	2.41607	2.06245	1.67034	9.0209	6.40656
TraesCS2D02G367400	C3	1.98613	9.28747	6.37207	14.3924	11.6248
TraesCS4D02G348700	C4	1.08324	6.1359	4.00223	8.21714	12.4795
TraesCS5A02G524500	C4	0.597801	2.27386	2.11583	5.17269	7.7918
TraesCS2A02G391600	C4	0.94326	1.23468	0.779763	1.50041	2.08022
TraesCS2B02G410100	C4	1.09427	1.20199	0.829557	1.11109	2.1626
TraesCS2D02G389900	C4	0.899436	1.05997	0.657197	1.18994	2.05558
TraesCS1A02G082400	C4	0.269657	0.0422211	0	0.964998	1.1461
TraesCS6A02G091200	C4	0.583891	1.16499	1.71117	1.75618	2.35424
TraesCS4D02G186900	C3	8.18558	6.87103	10.6909	17.6329	10.3044
TraesCS2B02G135800	C4	6.53275	4.29109	6.46435	8.59264	8.34056
TraesCS2D02G118500	C4	6.50293	4.37057	6.42037	8.3221	7.72563
TraesCS5A02G058500	C3	1.13454	2.40277	0.982124	2.87601	2.77071
TraesCS5B02G131700	C3	8.78513	21.0663	27.993	43.6637	34.4239
TraesCS4A02G245900	C3	0.0120133	0.0655318	0.0583184	2.23558	0.890678
TraesCS4D02G068300	C3	0.0115283	0.0118629	0	1.23258	0.33476
TraesCS2A02G016500	C3	0.689775	2.59059	10.1769	13.3009	7.57994
TraesCS2B02G024500	C3	2.07467	1.73682	12.4236	31.7799	12.1497
TraesCS5D02G445500	C3	0.859678	0.802394	0.975221	4.25064	3.41966
TraesCS5D02G395300	C4	10.1634	6.66744	9.25812	10.3826	10.3128
TraesCS5B02G390200	C2	6.46032	4.31616	11.59	9.82709	8.29695
TraesCS5D02G395200	C2	6.57938	2.50788	8.76768	9.00333	9.18046
TraesCS1D02G266200	C3	0.256924	3.7882	2.88111	6.56991	3.08609
TraesCS4A02G135700	C2	4.21342	8.3633	11.9521	8.88107	6.10538
TraesCS4B02G169500	C2	7.24799	11.037	15.2921	10.0244	6.64221
TraesCS4D02G171500	C2	4.10674	7.15276	10.8986	7.07965	4.92887
TraesCS4D02G190200	C4	46.565	43.4028	71.6015	79.9886	104.191
TraesCS5A02G014200	C4	0.0881344	0.227175	0.394475	0.944762	1.37173
TraesCS5D02G019600	C3	1.3914	3.00433	3.97303	5.49005	5.23857
TraesCS5B02G531600	C2	0.351064	2.03899	17.2241	1.11001	0.332393
TraesCS4A02G177100	C2	0.534299	1.20582	3.48646	2.37118	1.15902
TraesCS4B02G141400	C4	2.05523	6.89062	6.43855	10.4107	12.3488
TraesCS7D02G268500	C2	1.02944	0.94663	2.30162	2.38277	2.10869
TraesCS4A02G171900	C2	2.81369	7.18203	27.3774	4.50661	1.59771
TraesCSU02G110500	C3	0.817331	0.255102	0.242606	1.44834	0.764486
TraesCS1B02G078800	C4	2.8385	2.01292	4.04336	5.00126	7.0869
TraesCS3B02G543100	C4	0.428775	0.480954	0.78115	0.883882	1.29941
TraesCS2A02G042100	C3	6.097	12.6459	20.6455	22.6782	14.3075
TraesCS2B02G144300	C4	3.4622	4.51454	7.47167	9.14111	12.3866
TraesCS5D02G336900	C4	0.475945	0.0533783	0.826159	5.7316	9.10669
TraesCS3A02G406600	C4	0	0	0.901264	1.32957	1.71808
TraesCS2D02G232700	C3	2.09796	4.99605	6.9482	7.99114	7.54565
TraesCS4A02G323500	C3	0	0.444175	0.181108	2.30928	1.78662
TraesCS7D02G039300	C3	0.0159044	0	0.447024	4.2266	2.98865
TraesCS7A02G542800	C4	3.79679	2.36818	3.6799	3.40958	3.9709
TraesCS2B02G492000	C4	25.8401	12.5931	24.3027	32.0253	36.2138
TraesCS2D02G469200	C4	6.8691	3.09323	8.9911	10.6101	12.286
TraesCS7A02G295000	C4	13.5143	8.39869	17.3266	14.7737	20.2897
TraesCS7B02G197400	C4	7.07242	2.14099	7.38969	12.3667	17.0611
TraesCS7D02G288600	C4	4.41041	2.7527	8.25081	11.7442	16.4561
TraesCS1D02G029500	C2	11.9294	7.03406	14.1685	12.7401	7.38733
TraesCS6D02G262900	C4	1.34796	0.0392993	0.683692	2.68753	3.71906
TraesCS4B02G368400	C3	0	2.08315	0.92993	6.3352	5.37538
TraesCS7B02G384600	C3	0	0	1.53026	9.78952	0.868335
TraesCS7B02G384700	C3	0	0.07019	6.55307	40.4417	5.91659
TraesCS4B02G370200	C3	0.204677	1.70968	1.67563	3.05898	3.28211
TraesCS6D02G047400	C4	7.91685	4.81867	7.4749	9.82952	11.7282
TraesCS2B02G325900	C3	0.126251	0.503326	0.973651	1.91922	1.33148
TraesCS5B02G081600	C3	1.49468	0.177434	1.40921	2.3076	1.6455
TraesCS4D02G282500	C2	2.60698	2.51966	2.53505	3.24794	1.63552
TraesCS4A02G226500	C2	5.95901	4.57599	12.6647	12.4155	10.7437
TraesCS4D02G086000	C2	5.87386	5.83511	13.334	11.9343	8.72858
TraesCS3B02G229200	C4	23.8347	20.6138	26.7764	36.4476	54.7396
TraesCS3A02G233700	C2	1.94511	1.2816	2.71392	2.02145	1.99733
TraesCS2A02G357700	C4	7.17913	3.68139	5.05945	10.6201	13.5924
TraesCS7B02G416200	C2	0.499738	0.162186	1.02599	0.65921	0.55982
TraesCS3A02G298500	C3	0.208812	0.302708	2.34864	3.66717	2.27736
TraesCS4B02G016300	C2	10.7858	7.63665	23.265	20.8155	24.1738
TraesCS6A02G111700	C2	8.97027	15.3544	27.3877	2.01712	0.700884
TraesCS3A02G132700	C4	5.36383	3.1371	3.41689	4.84388	5.69075
TraesCS7D02G388600	C4	3.06837	1.28205	1.9106	3.56642	2.77533
TraesCS7D02G460300	C3	0	0	0.0908068	2.9151	1.56066
TraesCS6D02G395000	C4	0.0358296	0.497529	0.476714	0.628499	1.0119
TraesCS6A02G234400	C3	0.504923	0.999252	6.06245	13.7887	7.71521
TraesCS6B02G263100	C3	0.0965691	0.264333	2.26648	2.87465	2.34655
TraesCS6D02G216900	C3	0.0411079	0.0602911	0.594749	2.72253	1.70029
TraesCS2A02G336800	C4	2.14924	1.23458	1.89837	1.52138	2.30827
TraesCS3A02G048700	C3	0.00880939	0.155699	0.520467	1.45839	1.40965
TraesCSU02G238700	C4	0.0144146	2.09708	2.09105	4.63932	5.40903
TraesCS5D02G131300	C4	1.4972	1.38073	2.57457	2.21541	3.22106
TraesCS1A02G405600	C4	0.066039	0.11962	0.0968258	0.985755	1.25429
TraesCS4D02G336100	C3	0.582453	0.532835	0.426036	5.86748	1.05062
TraesCS1D02G268500	C4	0.54365	4.64168	0.731668	4.83404	7.70995
TraesCS7A02G077000	C3	0.100902	1.10982	0.0610344	1.16151	1.03001
TraesCS2B02G522500	C3	0	0	0.387672	2.57782	1.0844
TraesCS2B02G522600	C3	0	0.198552	0.217477	1.08127	0.852875
TraesCS2D02G495500	C3	2.65191	6.11023	12.113	17.7099	15.0996
TraesCS7A02G273600	C2	1.83367	1.04703	2.20149	1.68852	1.91644
TraesCS7D02G536500	C3	0.586512	0.187814	0.49531	1.22698	0.598281
TraesCS7B02G299000	C4	2.9471	2.53143	1.55825	2.60527	3.14827
TraesCS7D02G180800	C2	1.34353	0.217784	1.94145	1.1221	1.02789
TraesCS1A02G264800	C2	4.94213	0.812799	7.66098	5.90397	5.54748
TraesCS1B02G275500	C2	1.42604	1.6638	6.55897	5.25359	6.03812
TraesCS1D02G265000	C2	2.00398	1.33955	9.57911	7.80504	6.63804
TraesCS2B02G252100	C4	5.46838	1.52525	2.21116	4.55703	5.77192
TraesCS5A02G236200	C4	14.5072	6.20368	8.301	13.0467	15.5802
TraesCS4D02G178800	C4	1.07886	3.60156	0.47662	1.58451	5.07818
TraesCS1D02G389500	C4	5.89539	10.4843	10.3718	13.5982	20.1224
TraesCS3B02G034100	C4	4.3288	2.35348	19.3919	40.4578	67.9301
TraesCS3D02G031400	C4	1.41196	0.703749	26.1853	39.9946	63.7649
TraesCS6A02G295200	C2	0.729091	0.509641	3.37881	3.11317	1.66974
TraesCS6B02G326500	C3	1.86438	5.37729	7.80728	14.2289	8.10552
TraesCS7D02G206300	C3	0.334929	0.0248719	0.0529579	3.63278	0.741543
TraesCS2D02G344100	C4	16.2801	8.8545	10.8379	15.9675	16.5083
TraesCS5B02G158000	C4	0.945905	1.25642	0.718422	1.10066	1.57017
TraesCS5D02G165400	C4	0.661392	0.882144	0.615128	1.92797	3.15972
TraesCS1B02G055900	C3	2.95091	8.01794	9.32467	13.333	13.0149
TraesCS7B02G117700	C2	7.96246	9.0849	15.1655	8.73361	6.77454
TraesCS5D02G205000	C4	0	0.0701598	0.0375831	1.87489	1.80612
TraesCS2D02G344600	C4	0	0.894388	1.29269	5.1324	6.77383
TraesCS2A02G086300	C2	0	1.72962	3.73463	1.82327	0.882566
TraesCS2D02G377700	C2	0.318401	0.271304	2.47917	2.12929	1.22639
TraesCS3A02G235000	C3	0.878059	0.710224	0.474216	1.62048	0.893525
TraesCS3D02G056800	C3	0	0.683307	0.369803	4.56214	3.24905
TraesCSU02G067000	C4	8.77621	9.91457	13.3801	16.8413	21.7533
TraesCS7A02G110400	C3	2.60891	14.6537	18.2521	24.3063	18.3321
TraesCS4A02G220000	C3	0.44167	0.13029	0.81736	2.19516	0.923608
TraesCS3A02G283400	C3	1.98802	0.175774	2.74886	43.9232	8.37336
TraesCS3B02G317000	C3	0.502108	0.131476	0.109817	1.14321	0.507418
TraesCS3A02G215500	C2	1.18858	0.916265	2.91939	1.92079	1.45712
TraesCS3D02G294100	C4	34.0071	20.3972	23.6862	31.5556	34.1314
TraesCS3A02G132600	C3	4.4507	17.2526	28.1908	64.7142	60.4163
TraesCS7A02G346000	C4	3.06708	8.21899	20.0748	27.4712	38.9734
TraesCS2B02G196100	C4	216.289	331.169	345.526	449.398	807.319
TraesCS5D02G047600	C4	2.60126	1.01864	3.81656	5.51488	7.89831
TraesCS5A02G042600	C2	10.6476	5.60881	12.6188	12.5855	11.5124
TraesCS5A02G375500	C3	0.935053	3.38179	4.41823	7.54287	6.51152
TraesCS5B02G046200	C2	7.48298	8.50053	19.471	17.8406	18.7981
TraesCS5D02G051100	C2	7.2586	4.63001	14.4864	12.6756	12.2882
TraesCS5D02G385100	C4	2.06637	1.98666	4.88504	10.4512	10.5026
TraesCS5A02G050100	C2	2.79509	6.97044	13.1994	10.3114	8.10838
TraesCS7D02G454700	C2	4.50902	8.9695	14.2765	11.2678	11.0122
TraesCS5B02G366700	C4	0.988246	3.42114	4.29393	6.88634	8.86842
TraesCS6A02G156600	C4	0.371228	3.14664	6.54733	7.35862	12.7218
TraesCS6D02G146600	C4	0.501691	4.29972	10.2029	19.7594	28.8137
TraesCS4A02G403400	C4	0.457324	1.20139	1.55411	6.98501	7.75491
TraesCS7A02G104900	C4	1.41046	1.41405	2.51906	4.5817	5.12613
TraesCS3A02G172000	C4	42.5848	85.7026	101.761	114.804	175.626
TraesCS1A02G177000	C3	0.200729	1.69375	2.96544	7.27567	4.40064
TraesCS1B02G203200	C3	0.0314964	0.455605	0.485709	2.33399	1.65477
TraesCS1D02G175400	C3	0.0225657	2.36803	2.22388	5.99968	3.24927
TraesCS3B02G419800	C3	0.0162267	0.0350088	0.0424839	1.00768	0.76648
TraesCS2D02G078200	C4	1.38199	3.49419	4.87431	7.42225	9.72631
TraesCS4A02G076500	C4	2.64473	1.49096	1.28745	2.55968	2.81552
TraesCS4A02G379000	C4	0.185632	0.311467	0.672728	1.02813	1.26077
TraesCS7A02G440800	C4	0.516764	0.89994	1.38089	2.21246	3.72618
TraesCS3A02G178900	C2	6.53212	3.25653	9.75635	7.34575	7.03994
TraesCS7A02G368200	C4	3.1531	0.663692	7.23609	9.4173	12.5176
TraesCS7B02G260400	C4	0.449018	0.178723	5.31531	8.29822	12.3392
TraesCS1A02G389200	C4	0.437893	0	0.354066	1.30248	1.2708
TraesCS2B02G358700	C3	0.639565	2.12999	3.14242	4.11426	4.85187
TraesCS3A02G179500	C4	2.67657	0.0997845	0.510154	1.82891	3.96254
TraesCS3D02G184400	C4	5.51222	0.10479	0.747537	4.08729	5.99197
TraesCS2A02G341500	C4	79.3213	54.8941	67.6605	86.8985	99.5884
TraesCS2B02G339200	C4	70.9459	50.2179	79.9398	108.281	132.761
TraesCS7B02G249100	C4	13.703	21.494	35.0299	36.4966	54.9281
TraesCS2A02G204700	C3	2.57798	3.09342	10.0964	12.8072	8.26192
TraesCS2B02G232300	C2	3.36022	2.46513	11.2587	12.2089	7.91411
TraesCS2D02G211200	C2	1.49577	2.12816	8.15951	8.45308	5.67128
TraesCS5A02G237300	C4	3.37755	1.57874	3.33036	3.2693	3.93652
TraesCS6D02G312000	C2	14.6317	8.55547	14.9942	12.9445	13.0494
TraesCS3A02G193400	C2	3.19131	1.92317	6.85548	7.09569	5.66252
TraesCS6D02G025700	C4	0.509428	0.294638	0.455344	1.12525	1.8082
TraesCS2A02G577400	C4	6.6708	5.13808	5.03168	12.8158	12.465
TraesCS6A02G320700	C4	0.0186625	4.04197	1.8036	6.96341	12.943
TraesCS4D02G111100	C3	1.24211	1.34369	9.30594	10.7859	10.194
TraesCS5D02G400900	C3	20.1813	27.1963	7.89011	46.9062	13.7476
TraesCS6A02G228400	C4	2.58269	1.65467	3.27515	4.78153	4.73919
TraesCS5D02G142300	C3	0.0357873	0.258398	0.162218	1.89375	0.713328
TraesCS7A02G389900	C4	0.559669	0.540917	0.421768	0.809158	1.17859
TraesCS5B02G480000	C2	0.0289707	0.302252	1.0414	0.820195	1.00456
TraesCS6D02G076000	C4	0.119744	0.181676	0.64168	0.833922	2.03444
TraesCS5D02G506000	C3	4.6722	3.10853	3.23534	5.89194	4.88416
TraesCS2B02G592000	C4	3.28053	2.65178	2.57739	5.11306	6.17419
TraesCS2D02G562500	C3	0.297351	2.73371	1.28304	4.81301	3.14133
TraesCS1A02G195000	C3	4.96246	17.8868	20.2668	30.596	15.1855
TraesCS6D02G031300	C3	1.29306	3.4562	5.87289	9.01198	6.99187
TraesCS2D02G561400	C4	1.45968	1.01012	0.250128	1.39642	1.54748
TraesCS3D02G217700	C2	6.07054	7.7918	16.5803	13.1906	11.9241
TraesCS4B02G032200	C4	24.3467	23.9667	16.556	25.3262	25.1898
TraesCS3A02G244400	C4	0.861559	0.98476	0.227598	1.06023	2.76307
TraesCS3D02G247000	C3	1.23522	0.447579	0.752113	3.61462	2.77201
TraesCS7A02G236400	C3	0.350908	0.359519	0.560373	1.26637	0.885647
TraesCS7A02G154800	C4	2.63093	4.12407	6.7455	8.41721	11.0607
TraesCS6A02G139600	C4	1.67383	2.82755	4.81514	5.5731	10.0187
TraesCS6D02G129700	C4	2.09975	1.69972	2.07704	2.78971	4.33148
TraesCS7A02G465000	C4	1.74486	0.366329	0.200425	1.81512	3.24749
TraesCS7B02G365900	C4	6.15525	0.493244	1.23183	5.95585	9.83108
TraesCS3B02G459100	C3	0	1.50874	1.02977	2.36794	1.29736
TraesCS4A02G107100	C2	4.67674	99.5527	141.915	16.9401	8.40369
TraesCS4B02G197300	C2	4.10921	3.66137	6.10166	2.38035	2.3688
TraesCS5B02G219600	C3	0.37063	3.25079	2.98199	6.50697	5.65296
TraesCS5D02G228500	C4	0.134234	3.30553	4.11474	11.194	17.084
TraesCS4A02G262700	C3	7.0468	6.07353	7.12487	14.9309	11.3574
TraesCS6B02G266000	C3	2.45399	1.27021	2.62912	3.62412	2.38452
TraesCS7D02G325000	C3	0.0398776	0.0150004	0.0811042	2.90835	2.02086
TraesCS2B02G385900	C2	0.411363	1.51757	4.85823	3.85354	3.90245
TraesCS6D02G275300	C3	1.44248	3.69154	5.00556	6.42875	5.60814
TraesCS3A02G151300	C2	1.35374	4.95317	14.3824	3.74992	1.31554
TraesCS3D02G159200	C2	15.4344	41.6457	76.9671	33.5599	24.4212
TraesCS7A02G344200	C2	3.89948	3.31256	9.33247	7.16503	7.25388
TraesCS4B02G358500	C4	6.05586	0.356682	10.5725	12.2278	13.8907
TraesCS4D02G351700	C4	2.07106	0.733053	6.20264	6.68551	8.98311
TraesCS1B02G254500	C2	2.32997	3.19417	4.45121	1.41886	0.953653
TraesCS5D02G087400	C4	14.9864	13.7186	8.98754	13.236	16.3411
TraesCS2B02G412200	C3	0.154392	0.532687	0.481672	1.51544	1.1266
TraesCS2A02G456700	C4	4.47619	0.553356	1.18612	3.91843	3.97002
TraesCS2B02G478900	C4	3.62165	1.37239	2.69537	5.94479	6.11637
TraesCS2D02G457000	C3	2.83604	1.41863	3.61321	5.79809	5.00879
TraesCS5A02G531400	C4	1.85422	1.43084	2.03539	3.30698	3.60642
TraesCS4B02G002400	C4	10.9786	10.1565	17.2499	23.3412	25.4669
TraesCS2A02G282300	C4	2.66076	0.230987	3.37344	5.24345	9.7137
TraesCS2B02G299700	C4	5.54304	1.26461	5.22747	4.94029	8.17722
TraesCS4A02G238400	C3	0.0233973	0.211306	3.23435	5.36036	4.44199
TraesCS4B02G076500	C3	0.35438	0.261901	2.36127	5.30472	3.34125
TraesCS1A02G302600	C3	1.15377	0.986944	2.57301	4.56613	3.08739
TraesCS1B02G312800	C3	0.892162	0.54776	1.24517	1.83581	1.133
TraesCS2D02G314100	C3	2.83888	7.11485	10.3931	11.933	9.72129
TraesCS2B02G530300	C4	101.582	48.3125	59.6239	113.206	88.8563
TraesCS3B02G246400	C3	3.10036	5.25514	8.68169	12.0592	13.2643
TraesCS5A02G227700	C3	0.899042	2.12438	1.45849	3.03884	2.31205
TraesCS5B02G226500	C3	0.434849	1.64026	0.862947	2.05628	1.90595
TraesCS5D02G235200	C3	0.904053	2.03798	1.78153	3.55605	3.22129
TraesCS4A02G403900	C3	0	0	0.130563	3.84047	3.20433
TraesCS2A02G169700	C4	0.0114426	0.0262823	0.230836	1.42232	1.67128
TraesCS2B02G193200	C3	7.63965	5.27996	7.59418	8.92196	7.8637
TraesCS7A02G305000	C4	1.93415	0.700026	0.682917	2.59373	3.10341
TraesCS7D02G300500	C4	1.51773	0.624707	1.12139	3.08369	3.02324
TraesCS5D02G489200	C3	1.30033	1.01957	2.36847	3.68617	2.35806
TraesCS1D02G330600	C3	0.116954	0.760763	0.653664	1.33219	1.28667
TraesCS6B02G173300	C2	0.848512	0.847524	2.94239	2.75081	1.51429
TraesCS5B02G201300	C3	2.94167	4.79023	10.1894	15.5423	13.1481
TraesCS7A02G474000	C3	1.8252	1.57855	2.14152	4.71404	3.93302
TraesCS7B02G375400	C3	3.27354	2.71285	5.50322	12.2571	9.23792
TraesCS7D02G460900	C4	2.71798	0.500125	1.16909	4.38108	4.3895
TraesCS7D02G376700	C4	4.69545	3.11063	5.38684	5.78099	5.71962
TraesCS2D02G182600	C3	0.303848	1.12112	1.57938	2.51804	2.73954
TraesCS7A02G280900	C3	0.0513678	0.351319	0.396756	1.01017	0.701936
TraesCS6B02G180100	C4	9.82664	17.3004	17.7668	22.2237	30.9503
TraesCS3B02G447200	C3	3.94463	6.34781	16.1121	17.3262	16.1231
TraesCS4A02G072300	C2	1.05163	2.10713	3.10835	2.07677	1.40511
TraesCS4D02G321800	C2	0.217745	0.146232	3.08099	0.288337	0.15017
TraesCS5A02G497200	C4	2.26977	1.33891	1.49933	3.38367	3.09561
TraesCS7D02G153100	C3	0	0.0543623	0.0541604	4.90325	2.08301
TraesCS4A02G069100	C3	0.0606127	1.80879	3.2112	8.47265	8.54042
TraesCS4B02G226300	C4	0.0588536	5.91052	7.52976	17.1505	21.7978
TraesCS4D02G226900	C4	0.112823	3.48367	2.2895	6.62951	9.87056
TraesCS7D02G359000	C3	0.300848	0.884646	1.08226	2.33407	1.85982
TraesCS3D02G388300	C2	3.65028	8.22291	14.5068	11.2855	13.4788
TraesCS4A02G080400	C4	16.7514	4.44804	8.20138	16.6885	15.9044
TraesCS4D02G223900	C4	8.7383	3.48579	6.62494	13.6483	12.5141
TraesCS6B02G106100	C3	52.8538	52.8865	85.7703	131.402	97.3567
TraesCS4B02G020300	C2	344.802	953.306	2225.75	1170.96	1630.87
TraesCS4D02G272200	C2	9.89524	19.1061	44.2633	9.84207	3.97257
TraesCS4B02G398000	C2	18.0483	7.26359	22.5288	21.0298	22.0909
TraesCS2A02G263300	C4	214.749	210.719	209.606	320.819	428.57
TraesCS7B02G441200	C4	6.20595	2.4239	3.14549	5.20214	5.90803
TraesCS3A02G370100	C4	2.38727	1.21623	1.76526	3.46245	3.99702
TraesCS3D02G363000	C4	0.79944	0.500092	0.511098	1.02923	1.96137
TraesCS5A02G547000	C3	0.50763	0	0.0245311	2.10605	1.10583
TraesCS5A02G066500	C3	1.89349	3.1025	5.63573	6.97769	7.56851
TraesCS5B02G073200	C4	1.3214	2.2605	3.69581	4.25307	4.90634
TraesCS5D02G077600	C4	1.20102	2.07378	3.03836	3.69881	5.09358
TraesCS2B02G275800	C2	0.274297	0.26997	1.02625	0.845474	1.01529
TraesCS5A02G404300	C4	0.95862	0.922583	1.95687	1.93421	2.71356
TraesCS1D02G166600	C3	64.8351	15.3222	44.5327	82.4104	53.0319
TraesCS2A02G430400	C3	0.144819	3.8324	3.13749	6.18452	5.90386
TraesCS7B02G203800	C3	8.42921	12.5818	21.5771	28.4555	19.8042
TraesCS5A02G225800	C4	1.96058	2.14376	4.16009	4.17375	5.19403
TraesCS5D02G233100	C4	2.35377	0.827317	1.72332	1.96258	3.27617
TraesCS1A02G035100	C2	4.15712	3.95869	4.35462	4.30679	2.53852
TraesCS6B02G210800	C2	32.3944	17.3853	35.1325	32.8512	34.2382
TraesCS6D02G169300	C4	35.574	21.138	31.1704	32.9847	33.926
TraesCS4A02G258400	C3	0.0809882	0.400387	1.56781	3.89952	3.46341
TraesCS4D02G056400	C3	0.229382	1.33335	2.32408	3.47081	2.8546
TraesCS5A02G136600	C3	0.647925	4.82415	3.0069	7.66051	3.18122
TraesCS3B02G607500	C4	1.57187	3.30743	3.78804	4.44893	6.203
TraesCS3A02G275500	C4	4.26281	3.60197	4.08884	8.55498	10.4611
TraesCS6A02G139300	C4	1.35396	2.31293	14.7735	18.2416	23.8988
TraesCS6D02G128100	C2	2.00753	3.68758	16.4879	16.1751	15.4233
TraesCS3A02G333500	C4	1.6569	1.26712	0.313919	0.955075	1.96445
TraesCS5B02G130100	C2	2.40763	1.54059	2.93917	2.06679	1.86624
TraesCS6A02G019300	C4	5.79059	4.48997	7.58052	8.60814	13.1015
TraesCS3A02G499000	C4	4.3083	7.2568	11.5168	13.8948	19.7108
TraesCS5D02G162500	C2	7.33233	3.73293	19.647	15.602	13.0029
TraesCS2A02G450600	C4	0.313529	0	0.358032	1.01058	1.71504
TraesCS1B02G206000	C3	3.95989	9.96257	12.4402	16.7159	14.1095
TraesCS5A02G304800	C3	0.287557	1.06104	0.771674	1.43082	1.04985
TraesCS2D02G359200	C2	1.43179	1.56422	2.67956	1.60147	1.05735
TraesCS2A02G222700	C2	0.0884708	0.0243317	1.1103	0.0489907	0
TraesCS6B02G059300	C3	0	0.180707	0.0636086	1.23811	0.644502
TraesCS7D02G087300	C3	0.112503	1.10886	0.953921	1.67862	1.44403
TraesCS4B02G380200	C4	0.0568997	0	0.199468	1.04639	1.98771
TraesCSU02G130400	C4	0.049593	0	0.28128	1.16095	1.90241
TraesCS6B02G219200	C4	0.445269	0.720867	0.779173	1.17868	2.41428
TraesCS7D02G297900	C4	2.37478	0.831099	2.07282	3.54146	4.71701
TraesCS7B02G181200	C2	10.2404	10.4494	27.1432	16.974	12.2397
TraesCS7D02G278800	C2	10.729	9.88569	28.3866	16.5485	12.289
TraesCS2B02G309000	C3	0	0.269123	0.0592541	1.03856	0.493561
TraesCS3B02G345900	C4	129.965	62.2599	101.137	154.481	201.412
TraesCS3D02G311100	C4	123.067	67.1528	86.7898	135.917	223.285
TraesCS2A02G381300	C3	0	0.843015	0.362388	3.06485	0.811775
TraesCS4A02G105000	C2	1.75316	4.87508	8.27177	7.57801	3.94069
TraesCS4B02G199000	C3	1.33072	3.68004	7.56369	9.01314	4.38714
TraesCS1A02G303600	C4	0.124417	3.20486	5.39335	10.1813	22.8079
TraesCS1B02G314000	C3	0.0250528	0.868512	1.34253	1.73099	1.83212
TraesCS1B02G206300	C3	0.852713	3.59259	8.15966	8.80533	5.9947
TraesCS6B02G254400	C2	0.77286	1.7133	3.87071	3.08568	2.96828
TraesCS1B02G157700	C3	0.234664	0.584259	0.951762	2.13373	1.88553
TraesCS2A02G525300	C3	0.150467	1.61091	1.13983	2.63214	1.69024
TraesCS2B02G555200	C4	0.0538485	1.8678	3.18372	2.71912	4.34828
TraesCS6B02G434800	C4	1.79337	2.96086	2.03581	3.72812	4.51962
TraesCS7B02G241900	C3	14.615	10.056	13.5749	17.1322	14.9885
TraesCS3B02G072200	C4	13.1556	5.75755	7.14392	11.1147	18.5645
TraesCS7B02G146700	C2	7.08172	10.6227	24.0127	19.1443	15.3107
TraesCS5B02G531400	C4	19.0472	32.6748	48.8434	65.2921	80.2483
TraesCS2B02G219700	C3	0.0153849	2.26875	4.60726	6.49218	3.86724
TraesCS2B02G410600	C4	2.96055	4.10875	5.06363	7.59294	9.18045
TraesCS4B02G320500	C4	6.39395	4.06807	4.4352	5.98436	7.25931
TraesCS4D02G317000	C4	7.14616	4.68622	6.16061	6.84331	10.7352
TraesCS1B02G174400	C4	9.36403	6.15418	8.10239	10.5302	9.93329
TraesCS4B02G222400	C4	1.81006	0.854201	1.13816	1.8575	2.06645
TraesCS7A02G512100	C3	0.4951	1.60692	5.16783	6.26152	6.4154
TraesCS4D02G143800	C2	1.25275	2.50118	4.20834	2.90471	2.63025
TraesCS3A02G192500	C3	0.774669	1.34748	1.99262	3.19721	2.26166
TraesCS3D02G196400	C3	0.323196	0.943868	1.31357	1.72885	1.47599
TraesCS3B02G365700	C4	1.25283	1.1642	2.26953	2.71293	2.92294
TraesCS2A02G343300	C4	0.0448408	0	0.717245	7.69631	7.39176
TraesCS2D02G321600	C4	0.0629057	0.122235	1.54723	8.53644	8.61228
TraesCS2D02G322200	C3	1.16813	2.86878	3.17159	10.7218	3.75667
TraesCS7A02G391300	C4	2.7317	1.78274	6.00694	8.90029	9.41677
TraesCS6B02G415800	C4	2.69402	2.34349	5.87079	6.60572	7.38767
TraesCS5B02G509300	C2	4.61302	2.33843	5.66467	4.50807	5.09821
TraesCS5D02G509200	C2	2.94995	2.72931	8.59205	6.05983	5.22036
TraesCS5A02G163600	C4	13.8152	2.68511	10.5462	10.8526	21.412
TraesCS6A02G321900	C3	0.252474	1.47976	1.46651	2.18488	1.94318
TraesCS5B02G165400	C3	0.54941	1.15367	1.13297	3.40016	0.790233
TraesCS5B02G051300	C3	0.239375	0.705442	1.40316	1.67242	1.70867
TraesCS5A02G000900	C4	10.036	6.58704	10.0695	20.1279	22.1596
TraesCS4B02G140700	C4	0.907304	0.345972	0.931912	1.31372	1.66906
TraesCS3A02G328700	C3	0.136425	0.539588	0.54157	2.31198	0.434832
TraesCS3B02G359100	C2	1.43185	1.62297	2.01366	2.29026	0.878231
TraesCS2A02G186900	C2	3.08473	3.99288	11.6928	7.02759	4.96524
TraesCSU02G136900	C4	0.90139	2.71847	3.67566	3.96668	5.33458
TraesCS2B02G372100	C4	0.430676	1.90667	2.41737	2.33181	3.7822
TraesCS2A02G591500	C4	2.93018	1.11161	2.35109	2.69555	2.77136
TraesCS2D02G562800	C4	2.15553	1.39757	2.03284	3.14813	3.31498
TraesCS6A02G176400	C4	32.4353	10.3758	18.4861	29.413	43.6511
TraesCS6B02G209100	C4	8.38757	3.5501	4.76587	6.52473	10.1838
TraesCS3A02G109300	C3	0.518819	8.80019	19.2551	29.9687	16.8505
TraesCS3B02G496800	C2	4.31286	0.850653	4.59431	3.61847	4.70256
TraesCS1B02G267800	C3	1.37407	5.74517	6.08244	11.9704	5.87852
TraesCS1B02G400500	C3	0.177125	0.0692422	33.1507	79.5875	61.3301
TraesCS4D02G321400	C3	0.0640569	0	0.145336	1.06607	0.66972
TraesCS5A02G023600	C2	0.0971315	1.67523	147.037	169.785	92.1896
TraesCS5A02G496800	C3	0.0804593	0	0.143179	1.13861	0.923941
TraesCS6A02G419300	C4	0.0710317	0.0482993	0.56778	5.14864	4.85873
TraesCS6A02G419500	C4	0	0.0172487	0.26817	2.35447	2.43617
TraesCS6B02G118700	C3	0.0577859	0	0.179842	1.05376	0.375942
TraesCS6D02G406800	C4	0	0	0.124055	1.8327	2.40071
TraesCS6D02G407000	C4	0.0754444	0.0149557	0.091745	4.28806	5.58217
TraesCS7A02G236300	C3	0	0	0.452258	1.91543	1.63099
TraesCS7B02G134300	C3	0.166128	0	0.478336	1.53709	1.12056
TraesCS7D02G236400	C3	0.102206	0	3.56281	8.02258	4.81115
TraesCS5A02G238700	C4	0.548573	0.323542	0.337491	1.86468	1.68505
TraesCS5D02G245600	C3	0.395159	0.618314	0.157193	3.76225	0.977287
TraesCS1B02G153000	C3	0.411571	2.33559	3.77971	5.49305	3.73085
TraesCS1A02G023300	C3	0	0	0.021026	6.81467	6.07436
TraesCS3B02G586300	C4	0	0	0	2.59085	4.27148
TraesCS3D02G306100	C3	0.0685549	1.28185	0.143801	10.5168	7.13376
TraesCS4B02G018300	C3	0.0818906	2.93456	7.65429	9.01625	6.61965
TraesCS4D02G016500	C3	0.583415	1.67742	2.795	5.07049	4.68406
TraesCS5A02G383200	C3	29.1323	69.6479	70.6828	129.68	106.418
TraesCS5A02G340300	C4	1.87535	1.25883	2.12083	2.60756	2.62267
TraesCS1D02G372300	C3	0.285357	0.81422	0.900885	1.16979	1.10444
TraesCS2A02G544800	C2	0.225727	0.377181	6.61151	2.23237	1.58057
TraesCSU02G022800	C3	0.358418	0.579518	0.581772	4.40294	3.02921
TraesCS3A02G213500	C2	0	0.0395562	1.4514	1.15331	0.698099
TraesCS3A02G288300	C3	0	2.13853	4.62256	7.488	5.5676
TraesCS3B02G322900	C3	0	0.891934	1.37037	2.77668	2.69605
TraesCS3D02G160500	C3	10.4652	32.086	36.481	45.3024	48.717
TraesCS2A02G011300	C4	14.3865	11.3925	16.1624	28.8416	44.6518
TraesCS2B02G010300	C4	8.89822	6.48101	7.638	13.1223	14.7763
TraesCS2A02G278700	C4	11.6928	15.4147	13.8799	19.6041	31.2059
TraesCS2A02G451000	C3	0.0655767	0.0433681	1.14075	5.52536	3.18699
TraesCS5D02G496800	C4	20.6408	13.8766	7.32156	21.0297	20.1966
TraesCS1B02G047400	C3	4.49958	9.66499	15.5743	15.8103	17.7572
TraesCS7B02G161200	C4	7.6518	4.93778	6.50688	10.436	10.1666
TraesCS3D02G065100	C2	0.382996	0.331023	2.09471	0.11274	0.121184
TraesCS3A02G356800	C4	0.0712363	0.892938	0.121258	0.815589	1.84132
TraesCS5A02G392800	C2	0.765392	1.80375	5.42284	5.61167	3.65451
TraesCS6A02G231000	C3	0.440004	6.94215	8.39538	11.4534	12.122
TraesCS4D02G197900	C4	3.21778	4.06391	6.27487	9.53559	14.4479
TraesCS3B02G389500	C4	0.210743	0.0568706	1.96048	3.42852	4.36104
TraesCS3D02G202600	C3	0.886948	2.3759	2.88679	3.79626	3.5046
TraesCS1B02G093900	C3	0.395946	0.725614	2.68396	10.2658	5.76582
TraesCS2A02G265100	C2	0.766761	1.06746	2.83639	2.49744	2.53141
TraesCS2B02G276900	C3	0.641092	0.709779	1.46652	1.88178	1.41971
TraesCS5B02G135800	C3	2.25988	0.478742	3.60921	17.6134	12.6038
TraesCS5D02G154800	C3	0.233284	0.701863	9.30935	21.3884	13.234
TraesCS5A02G239200	C4	1.71198	0.121045	1.25324	10.5199	17.6758
TraesCS5B02G237800	C4	1.35711	0.158422	0.0248506	2.52949	3.53712
TraesCS5D02G246300	C4	3.29689	0.0251483	0.649753	6.01138	11.2669
TraesCS6D02G222700	C3	0.535893	1.62442	1.7726	2.71787	1.9346
TraesCS5A02G403400	C3	1.26413	0.146503	1.13744	2.0233	1.57305
TraesCS5D02G065000	C4	14.7112	19.4084	15.9851	27.8242	34.4008
TraesCS7D02G380100	C3	0.13093	0.400033	0.896455	1.70025	1.14674
TraesCS1B02G319200	C4	0.775241	0.219181	0.599868	1.08587	1.63711
TraesCS2A02G102300	C3	6.21992	16.4737	20.7837	23.34	27.8787
TraesCS1B02G158600	C3	0.838315	5.30984	6.03337	9.44492	6.70702
TraesCS3D02G461600	C2	3.7794	3.77964	9.39895	9.54235	8.20929
TraesCS1D02G269000	C4	0.172255	0.202222	8.95496	18.6872	19.5763
TraesCS3B02G395400	C3	7.10032	15.6921	16.1849	23.0398	21.5147
TraesCS3D02G471100	C3	0.370791	0.393525	0.932755	1.88027	1.8433
TraesCS4B02G170500	C3	0.496577	0.84712	1.63768	2.70739	2.36465
TraesCS2B02G152100	C2	14.908	7.25593	18.5973	13.8478	12.3743
TraesCS2D02G132100	C2	15.7616	10.7998	25.3115	20.9226	18.5145
TraesCS6A02G218000	C4	0.0738435	0.0842744	0.586431	1.90917	2.61853
TraesCS1A02G189000	C4	20.734	14.5213	24.1712	33.5616	45.4421
TraesCS1B02G196700	C4	16.0497	12.9544	20.6853	33.1942	44.2714
TraesCS1D02G187400	C4	9.90491	9.49952	16.9806	25.8483	35.2944
TraesCS1A02G352500	C4	2.86738	0.584217	2.3066	4.92953	5.05196
TraesCS3B02G139100	C3	0.0759273	0.0201687	0.0489503	1.02236	0.483859
TraesCS3D02G121800	C3	0.0241684	0.0268114	0.0429415	2.45887	0.511513
TraesCS2A02G357000	C4	0.817992	3.46493	3.9161	3.66565	6.42789
TraesCS7D02G299600	C2	3.86064	5.37484	12.1737	7.69465	8.43579
TraesCS3B02G202300	C4	4.35095	2.98911	3.0452	4.70028	5.33426
TraesCS3D02G276900	C2	0.321157	0.371231	1.18721	0.186236	0.0496302
TraesCS7A02G368300	C3	2.26559	3.59205	5.23279	7.59775	8.25261
TraesCS2B02G330100	C4	31.2519	17.6115	22.968	23.9188	32.5945
TraesCS3B02G322600	C3	3.66346	4.25706	7.83802	10.6331	10.3533
TraesCS3A02G237800	C2	8.7273	6.56624	13.8451	2.41748	0.629898
TraesCS1B02G221200	C2	1.69338	0.631743	3.90086	0.286717	0.262417
TraesCS1D02G210800	C2	0.481404	0	1.28916	0	0
TraesCS7D02G060500	C2	7.81436	2.78242	13.4894	9.45505	6.01101
TraesCS6A02G281100	C4	0.149986	1.43427	1.33893	3.75231	4.81635
TraesCS7A02G220700	C2	0.700972	3.59891	9.0125	2.23172	0.869683
TraesCS7B02G126700	C2	6.01251	13.9788	23.2983	13.4365	6.97691
TraesCS7D02G221400	C2	2.09153	4.88537	11.2058	2.8688	0.629094
TraesCS5D02G195100	C4	7.3024	10.113	11.9165	15.2771	23.6536
TraesCS1B02G178100	C3	0.204614	2.07327	0.568828	3.18716	1.4136
TraesCS3D02G443900	C4	14.8423	10.0698	12.7841	16.4766	14.8791
TraesCS1B02G234200	C4	0.0352622	0.978189	3.95319	3.06405	6.51511
TraesCS6B02G116700	C3	0.157758	0.321696	2.65534	3.66848	2.46781
TraesCS6D02G078300	C3	6.92492	5.59645	34.6427	41.7386	36.2279
TraesCS2A02G447800	C3	7.34761	4.6068	5.99408	9.86284	7.61131
TraesCS1A02G412100	C4	0.955003	0.388781	2.4752	1.77771	2.7785
TraesCS1A02G348900	C3	4.63344	3.06364	7.84946	9.35187	7.67718
TraesCS1B02G364000	C3	1.48452	1.06483	5.12237	6.54909	5.22234
TraesCS3A02G236400	C3	0.0494309	0	0.170371	5.48331	3.02349
TraesCS3B02G263300	C3	0.0422116	0	0.071925	2.26266	1.14846
TraesCS3D02G236900	C3	0.0139238	0.254706	2.99694	8.94411	5.58556
TraesCS2B02G172300	C3	0	0	0	1.63533	0.482031
TraesCS2A02G253500	C2	6.57096	3.97542	12.1524	10.6765	12.2925
TraesCS2B02G273100	C4	6.52918	5.05138	9.77033	8.70641	11.0593
TraesCS7A02G243700	C4	5.32602	1.91763	6.11193	7.46732	7.82634
TraesCS7A02G073700	C4	16.7497	8.64376	22.4707	25.4766	28.8787
TraesCS7A02G316000	C2	1.08513	0.625855	6.53774	2.93045	3.0387
TraesCS7D02G313000	C2	3.85873	2.24558	11.6734	5.76879	6.05726
TraesCS1A02G409900	C2	9.2627	5.10412	10.6485	7.26259	6.90882
TraesCS1B02G439900	C2	17.2145	12.3572	21.6427	11.4348	12.9832
TraesCS1D02G417300	C2	7.90408	2.98217	11.6545	6.62915	5.65999
TraesCS7A02G350000	C4	19.908	16.3841	33.8084	36.9236	50.8629
TraesCS7D02G328600	C4	40.6007	26.727	49.9506	45.1569	58.4682
TraesCS6A02G314400	C2	16.6196	10.0853	18.3996	16.4918	11.7089
TraesCS6D02G293700	C2	17.6274	12.5845	22.8793	18.2703	13.384
TraesCS7A02G278400	C4	5.32099	1.93715	0.476322	5.54166	4.87728
TraesCS2D02G340400	C4	2.78506	0.442712	5.26247	5.92029	5.96975
TraesCS7B02G214800	C2	12.73	12.3756	14.9668	9.69275	7.90648
TraesCS7D02G016100	C4	2.57241	2.23556	3.77983	4.5188	5.11508
TraesCS6A02G285900	C4	26.8779	15.0974	15.8387	22.3477	28.1698
TraesCS7B02G350500	C3	0.45164	0.896939	3.10807	6.35762	4.77065
TraesCS7B02G207200	C4	0.371885	0	0.090071	1.67289	1.47543
TraesCS2B02G236800	C3	1.52309	3.4453	3.30778	4.81846	5.42477
TraesCS3B02G327600	C4	6.80471	5.48094	7.01279	12.5411	12.2595
TraesCS3A02G276900	C3	0.27256	0.0169527	0.369718	1.49228	0.767756
TraesCSU02G050100	C4	9.12603	5.59625	10.7602	13.3848	14.8289
TraesCS2A02G270800	C4	1.53379	0.712094	2.49078	2.59477	4.9427
TraesCS7B02G050000	C2	1.60376	1.09709	2.84204	2.61864	1.93415
TraesCS1A02G055200	C3	4.93018	3.23581	4.11813	8.43435	6.86462
TraesCS1D02G055900	C3	7.10407	6.61927	4.64224	8.48189	6.98879
TraesCS6A02G110000	C2	3.0866	5.92439	9.6041	8.2441	7.71375
TraesCS6B02G149900	C3	1.72591	4.03475	3.37972	11.232	6.58089
TraesCS7A02G428300	C2	3.66633	3.74714	4.79082	4.78677	2.71544
TraesCS7D02G512200	C4	4.18289	2.99938	3.49981	6.24988	6.74899
TraesCS4D02G026500	C4	5.60341	4.22859	8.3853	9.78555	10.7995
TraesCS6A02G344000	C3	0.781675	0.230506	0.728344	3.35536	1.25368
TraesCS6B02G376200	C3	0.546585	1.15103	1.60638	5.65587	2.12541
TraesCS7B02G224700	C3	0.208051	0.335278	4.69369	8.78803	4.99663
TraesCS2A02G183700	C3	0.334246	0.341237	0.515183	1.00959	0.912559
TraesCS7A02G524400	C4	7.11867	9.39441	15.9793	26.104	29.7098
TraesCS4B02G234200	C4	1.49959	0.338897	0.508783	1.24045	1.76207
TraesCS2B02G421900	C2	3.31942	3.88328	6.74273	3.90891	1.73669
TraesCS2D02G401000	C3	0.850001	0.222662	0.968901	2.40917	1.27962
TraesCS7A02G537200	C4	2.21406	2.22171	1.36515	2.43798	2.3244
TraesCS7D02G524300	C4	1.44519	2.58194	0.500088	2.87883	2.88786
TraesCS5A02G461400	C3	0.670526	3.05311	4.04508	5.73792	5.48172
TraesCS5B02G471600	C3	0.58494	4.96472	5.70368	8.45313	5.86283
TraesCS5D02G474100	C3	0.0245918	0.631086	0.85611	1.70247	1.53761
TraesCS4A02G245200	C3	0.34326	1.54541	2.31257	3.12826	2.60342
TraesCS4B02G070200	C3	0.399234	0.679339	1.29459	1.9853	1.60813
TraesCS5A02G191200	C3	0.0146248	0.612218	8.31571	21.526	9.88534
TraesCS5B02G192000	C3	0.0124057	0.383727	1.03212	6.48492	2.22995
TraesCS5D02G199900	C3	0	1.65196	6.42996	11.7555	3.52971
TraesCS1B02G289200	C4	3.95272	2.89825	7.91142	13.5089	21.2525
TraesCS1D02G209200	C2	1.58692	1.84369	4.62596	3.1749	3.85445
TraesCS2B02G311500	C2	0.927933	0.763865	4.47444	3.1035	3.9219
TraesCS2A02G104100	C3	4.88029	5.92903	11.5548	14.6948	8.51182
TraesCS4A02G133400	C4	3.56189	4.51139	3.64369	7.70856	8.8628
TraesCS4D02G173400	C4	2.6028	2.16024	1.39382	3.4318	5.11315
TraesCS7B02G158700	C3	1.60981	3.69328	5.05695	6.4024	4.56167
TraesCS7D02G216000	C4	9.15525	14.3847	15.3991	26.0715	33.3638
TraesCS2A02G488200	C3	0.0135763	1.04362	0.88323	3.15167	1.14862
TraesCS2B02G515800	C2	0	0.653738	1.27989	0.536671	0.259181
TraesCS2A02G182900	C2	2.03444	0.77212	3.55206	2.89355	2.35729
TraesCS2D02G190700	C2	3.22684	2.11266	4.36023	3.25648	3.02943
TraesCS6A02G249800	C2	0.673468	1.83283	3.92798	3.39728	4.13434
TraesCS4A02G401500	C4	0.330367	0.210961	0.345046	1.23788	1.8788
TraesCS4A02G495900	C4	0.0143638	0.134936	0.158814	0.444476	1.41739
TraesCS7D02G003400	C4	0	1.28011	1.88119	7.00321	8.6529
TraesCS6A02G051900	C3	0.243797	0.915724	1.19968	1.71897	1.43795
TraesCS7B02G489900	C2	1.74682	1.55761	4.19443	3.71915	3.49328
TraesCS2A02G375200	C4	0.0778969	0.043675	2.05121	8.19547	10.1104
TraesCS2D02G561900	C2	5.7005	5.53562	12.0175	10.4415	10.2269
TraesCS3B02G318700	C3	2.73707	2.18206	1.55258	3.79019	3.09404
TraesCS3D02G284600	C4	3.29038	2.95249	1.93873	3.02098	3.52337
TraesCS7A02G064700	C3	0	0	2.70441	21.1903	15.4446
TraesCS1B02G447900	C4	0.281482	0.0177589	0.35337	1.32163	1.92069
TraesCS3B02G259000	C4	0.579407	0.387897	0.258454	1.04474	1.07474
TraesCS6B02G040500	C3	1.3847	2.76532	3.91038	4.82116	4.32924
TraesCS3A02G198800	C2	4.83947	2.74746	5.98994	4.73398	4.09238
TraesCS1D02G235900	C3	1.2726	2.37225	3.78597	6.35453	3.0368
TraesCS1A02G256100	C2	0.607956	1.06326	2.0697	1.85196	2.0652
TraesCS1B02G266800	C3	0.182253	0.804169	1.6496	3.65381	1.98774
TraesCS4A02G233500	C4	25.7407	18.2891	19.4586	23.1345	27.2201
TraesCS1A02G180000	C4	0.235216	0.0821758	1.00567	1.95142	2.28436
TraesCS5A02G388900	C3	4.21361	3.95524	12.0634	34.2456	7.75035
TraesCS5D02G398900	C3	10.1691	1.68522	3.49627	18.7493	3.31191
TraesCS5A02G285800	C3	0.065807	0.0782868	0.371991	1.37773	1.26968
TraesCS5B02G285100	C3	0.981906	1.88133	1.967	4.49185	4.06704
TraesCS5D02G293200	C4	0.701007	0.275147	0.429777	2.09593	3.68348
TraesCS7A02G298000	C3	1.57979	2.37908	3.63764	5.24384	4.94268
TraesCS7B02G188900	C3	2.06943	1.58502	6.20223	10.8225	9.31192
TraesCS7D02G293900	C3	0.752482	1.23329	2.30225	2.89317	2.70872
TraesCS5B02G000800	C4	0.21957	0.993325	0.900268	1.97213	2.7831
TraesCS6A02G331200	C3	0	0	0.116288	1.18175	0.775787
TraesCS3A02G016400	C4	0.49902	0.0113937	0.0269522	0.701518	1.28248
TraesCS3D02G028200	C4	0.374096	0.0114776	0.0139283	1.08499	2.18325
TraesCS1D02G100800	C3	0.0569062	0.764393	0.809452	5.23342	1.70821
TraesCSU02G040100	C3	0.302885	1.55066	1.71011	4.04374	2.26057
TraesCS1D02G328100	C4	0	0	0.320621	0.83732	1.04535
TraesCS3A02G427300	C3	4.22219	17.4929	62.6074	79.884	33.6502
TraesCS5D02G536200	C3	0	0	0.0189161	2.84411	1.43486
TraesCS1D02G434300	C3	0.0148269	2.0966	1.56561	6.49966	2.8964
TraesCS4A02G382800	C4	0.408687	0.25637	0.139114	0.395886	1.04613
TraesCS6B02G184300	C3	1.95143	4.21143	9.5729	12.6055	13.9782
TraesCS7D02G220500	C3	0	0.0971861	0	1.15147	0.129054
TraesCS1B02G022900	C4	0.951454	1.09889	1.69447	3.03649	3.79396
TraesCS2A02G291000	C3	0.537599	0.727054	0.246892	1.39317	0.623561
TraesCS2B02G307400	C3	0.20625	0.891921	0.120184	1.48589	0.222823
TraesCS2D02G288900	C3	0.622405	0.992879	0.794544	1.96655	0.65047
TraesCS2D02G197400	C3	0.0695355	0.104472	10.8716	15.4725	12.2922
TraesCS3A02G411700	C4	1.72497	8.69172	11.3493	96.4699	104.995
TraesCS3A02G468500	C3	1.07862	0.833176	207.671	668.333	455.228
TraesCS3A02G471900	C4	4.47605	17.3276	20.2403	56.8401	75.9605
TraesCS3B02G510300	C3	0.359445	0.393413	22.5112	82.0258	41.4887
TraesCS3D02G461400	C3	1.13327	1.5153	202.029	709.624	556.324
TraesCS3D02G466500	C3	0	0.0794611	0.289411	2.65323	1.136
TraesCS3D02G467100	C3	0	0.0192825	2.73798	17.7834	7.50052
TraesCS3D02G467500	C4	0.452589	1.2311	0.381529	1.16321	1.52457
TraesCS5D02G305100	C3	0.685696	0.482843	1.62123	3.96781	3.37693
TraesCS2B02G259300	C3	1.61116	3.30803	5.36742	7.07781	4.93301
TraesCS2D02G245900	C3	1.97999	2.49328	6.10595	6.84453	5.27079
TraesCS7B02G055000	C2	4.7754	2.95926	5.71722	5.03056	4.38831
TraesCS6B02G382700	C3	7.83001	8.64122	18.8696	22.6834	20.893
TraesCS3A02G381200	C4	2.11844	3.75206	4.45946	6.29978	7.29397
TraesCS7D02G271000	C2	0.502802	2.19865	4.94149	3.78074	3.69962
TraesCS3D02G172300	C3	0.0867706	1.31838	1.82037	3.15636	1.92861
TraesCS3A02G216200	C3	0.017548	0.172517	0.418832	1.22302	0.740963
TraesCS3D02G165500	C2	7.9464	6.87304	7.68518	9.19954	5.6628
TraesCS1A02G296500	C3	0.719142	0	0.229197	1.81943	0.41889
TraesCS5A02G208900	C3	0.430403	0.885354	1.76897	2.03954	1.28979
TraesCS2D02G463000	C4	14.2202	11.1993	46.4462	96.9153	124.471
TraesCS2A02G202400	C2	10.0909	3.67562	16.1271	13.6892	12.5858
TraesCS2D02G213200	C2	11.5039	3.38388	18.5222	13.6074	11.276
TraesCS5A02G005300	C2	18.3036	6.00018	18.0622	14.0854	16.4635
TraesCS5D02G007200	C4	15.2301	5.0159	17.9926	17.9039	23.7988
TraesCS1B02G323800	C3	1.15978	3.26335	3.44884	5.08406	5.65871
TraesCS2B02G265700	C3	0.46193	0.779492	1.42169	1.5662	1.56944
TraesCS2D02G252000	C4	0.80788	0.549687	0.628429	0.809801	1.12505
TraesCS4A02G256800	C4	3.48541	2.5019	3.91247	5.46135	5.61089
TraesCS4A02G251300	C2	18.3991	10.1865	32.8378	29.8211	18.8259
TraesCS4D02G062500	C3	6.27495	16.412	58.0346	84.1939	68.8299
TraesCS2B02G191100	C3	0.454013	2.66282	2.04524	4.22128	3.05953
TraesCS6A02G203700	C2	3.60911	2.47139	3.5929	3.91678	3.2955
TraesCS3A02G107900	C2	22.4929	6.80782	54.3982	38.0621	38.2777
TraesCS3B02G126500	C2	26.8593	9.56744	62.9096	43.9181	37.2796
TraesCS3D02G109700	C2	20.9782	8.55051	53.3645	41.1201	37.1853
TraesCS1B02G130800	C4	2.8666	0.97495	1.29278	2.62457	3.01752
TraesCS6D02G352100	C4	16.1164	13.2866	21.6735	23.457	29.5414
TraesCS4B02G115200	C3	0.368636	0.880144	1.00754	1.41639	0.922209
TraesCS7A02G208500	C4	0.0634708	0.493362	2.02575	3.02883	3.9903
TraesCS4A02G093800	C4	7.40538	4.01604	7.01294	8.37552	7.83402
TraesCS4D02G211300	C4	5.9152	3.61455	6.22574	7.27473	6.56608
TraesCS6B02G325400	C2	1.1606	0.491797	2.78247	1.39026	2.519
TraesCS6D02G275900	C2	9.80651	0.930638	16.915	8.94889	8.80242
TraesCS7A02G204500	C3	0.734695	4.39869	9.85678	28.7063	24.3023
TraesCS7B02G111700	C3	0.896298	1.06963	8.686	19.9137	12.8336
TraesCS7D02G207600	C3	1.29101	1.25287	15.68	34.9698	26.3978
TraesCS1B02G232700	C4	6.27126	15.7936	40.0791	50.8466	59.0422
TraesCS3A02G231600	C4	0.893028	3.83099	28.097	29.0313	37.8172
TraesCS3B02G098700	C4	1.45278	0.750619	1.94052	2.39824	3.6317
TraesCS3A02G169800	C2	2.13762	0.968076	6.04287	3.95973	3.76472
TraesCS3B02G196600	C2	1.83411	0.511345	3.92912	2.78081	2.29224
TraesCS7A02G189900	C3	4.29591	4.06209	2.82937	6.61658	3.89995
TraesCS7B02G327800	C4	7.45354	2.81967	7.19104	10.1602	13.0298
TraesCS7D02G420000	C4	3.09854	1.86279	5.49997	9.07341	14.8442
TraesCSU02G093700	C4	8.36244	6.31176	10.5513	16.9936	23.7638
TraesCS1D02G205300	C3	1.58218	1.07905	0.205662	2.07882	1.37231
TraesCS1D02G296300	C4	0.183832	0.259844	0.542309	2.05014	2.25318
TraesCS1D02G296400	C4	0	0.139912	0.208793	0.816686	1.44868
TraesCS2A02G097200	C4	2.18993	5.18142	4.59248	9.03539	11.7944
TraesCS2B02G112600	C4	0.56957	1.2024	1.4711	1.5868	2.52771
TraesCSU02G069000	C3	0.0401321	0.2516	0.024562	2.00443	1.04992
TraesCS5A02G182300	C3	0.0713168	0.356692	0.383827	1.59522	1.06683
TraesCS5D02G186700	C3	1.76817	0.299405	0.343754	2.69351	1.55696
TraesCS4A02G030600	C2	33.7325	39.2427	111.862	4.75897	1.94905
TraesCS7B02G244300	C2	9.56443	9.5066	38.0999	5.54353	3.95466
TraesCS1B02G083900	C3	9.74462	6.06794	8.92139	10.9411	8.7737
TraesCS3D02G384700	C2	18.9586	13.6546	29.4049	20.6137	15.8371
TraesCS4A02G019300	C2	0.160404	0.141113	0.9832	1.00969	0.760614
TraesCS5A02G401900	C2	1.61098	0.558795	3.2293	2.63414	2.74141
TraesCS5B02G406600	C2	1.94154	1.12737	3.88101	3.61365	3.40923
TraesCS6D02G160400	C3	2.16193	8.6152	6.66417	12.4852	9.7089
TraesCS3B02G590000	C3	19.7225	40.7683	71.3166	99.4684	75.5102
TraesCS3D02G528600	C3	23.3333	67.0516	138.409	148.225	104.372
TraesCS5A02G187700	C3	1.20148	0.132159	9.56836	12.9544	8.5227
TraesCS5D02G203300	C2	0.0157199	0.0722708	12.8049	9.57757	6.5939
TraesCS6B02G166400	C3	1.73392	2.24899	1.22047	2.97503	1.04209
TraesCS7B02G217700	C2	6.56894	2.15586	14.7813	8.19926	6.23529
TraesCS7D02G313600	C2	7.23119	2.94473	21.9512	12.3389	10.4685
TraesCS7A02G269600	C3	0.959906	0.82191	0.250214	3.6549	0.782084
TraesCS7D02G270100	C3	0.274215	0.597239	0.0943623	1.50028	0.885636
TraesCS2D02G113300	C2	0.158113	0.243612	6.70283	1.33024	1.09979
TraesCS2D02G255900	C2	7.20948	6.88852	15.4616	10.923	11.0492
TraesCS3A02G150200	C3	0.996401	1.6081	2.76396	3.64088	3.39171
TraesCS3A02G484900	C3	0	1.41573	4.02836	6.24381	3.74381
TraesCS3B02G532300	C3	0	1.4012	1.841	3.96478	2.6765
TraesCS3D02G479700	C3	0	0.524198	0.315295	1.03016	0.899669
TraesCS3D02G480100	C3	0.235266	2.86941	3.58573	7.6201	4.5757
TraesCS2B02G378100	C3	0.274429	0.0254585	18.8215	26.434	25.7814
TraesCS2D02G357600	C4	0.12174	0.0123817	17.1039	27.5507	30.7492
TraesCS5D02G286700	C3	1.7466	4.7144	4.54292	7.35286	3.68104
TraesCS7A02G271500	C2	9.51255	8.33659	10.1553	8.72113	5.46307
TraesCS7B02G170500	C2	7.47854	8.10002	11.1778	11.3114	5.48455
TraesCS2D02G386300	C4	0.63161	0.359715	0.292303	0.91021	1.35783
TraesCS6B02G285200	C3	1.25662	0.515694	0.414849	1.87328	1.07661
TraesCS3A02G230000	C3	1.1749	2.67954	0.78436	4.28464	2.41326
TraesCS4A02G484800	C3	0.020964	0	0	2.2539	0.317945
TraesCS4A02G486000	C2	11.1581	3.72869	10.0076	10.9624	9.35003
TraesCS7D02G359500	C3	0.125604	0.342202	0.33879	5.33776	1.39631
TraesCS1A02G320300	C4	0.282091	0.0946082	0.0436664	0.524158	1.01936
TraesCS5A02G264800	C4	15.726	9.09583	6.25777	16.3712	17.9791
TraesCS3A02G395000	C4	5.8461	8.79091	4.02273	8.69039	9.13901
TraesCS3D02G388700	C4	0.857296	1.06523	0.702153	3.08798	3.49103
TraesCS6A02G214900	C4	0.197161	1.71091	0.741162	1.09002	2.49989
TraesCS6D02G197500	C4	0.279716	1.34093	0.242428	1.63485	2.48105
TraesCS4D02G275500	C4	7.59667	5.02103	7.74644	8.38221	8.99781
TraesCS6B02G270200	C4	0.62036	1.29788	0.980006	1.84985	3.05042
TraesCS6D02G236600	C4	0.46554	4.55321	2.07033	7.2784	9.27453
TraesCS6B02G291200	C4	0.0289519	0.344672	0.271775	0.679936	1.04707
TraesCS5A02G250600	C3	0.443129	0.362941	0.469562	1.77388	1.60024
TraesCS5D02G258300	C3	0.473102	0.349949	0.695464	1.39672	1.02221
TraesCS1A02G118300	C2	1.5476	3.07832	5.18613	2.82629	3.2125
TraesCS4A02G022700	C3	0.0194329	0	0.223422	2.97067	1.06771
TraesCS5D02G013300	C3	0.665657	3.16945	2.05353	5.81228	2.88457
TraesCS5A02G085200	C3	4.41105	2.70748	6.81597	9.67148	8.13431
TraesCS1A02G191800	C4	1.15747	0.317483	1.87849	2.92284	3.07809
TraesCS1D02G195400	C4	2.36653	0.908069	1.97931	5.00339	5.32388
TraesCS5A02G207400	C4	22.5478	5.13325	18.43	25.0134	23.4639
TraesCS5B02G205700	C4	22.3666	8.01377	21.8217	43.6622	43.9089
TraesCS5D02G213500	C3	6.49645	3.58697	11.8969	16.7968	15.1988
TraesCS6B02G195800	C2	7.1345	5.78484	22.7999	17.4377	12.5548
TraesCS2A02G385900	C2	0.026314	1.33367	11.0559	5.64684	1.15106
TraesCS7B02G391800	C4	2.77934	1.6451	2.02951	4.28837	4.47163
TraesCS7D02G475100	C3	1.50423	1.62039	2.78863	6.62064	5.246
TraesCS3B02G004700	C3	5.64859	11.4644	16.9914	21.8348	21.5891
TraesCSU02G039400	C3	14.6447	27.7463	36.2551	42.7796	45.3854
TraesCS5A02G205700	C4	2.11039	8.10263	5.14302	17.5496	22.3105
TraesCS5B02G396600	C4	1.70541	0.780585	0.567407	2.73617	5.17764
TraesCS3B02G469100	C4	7.02259	4.44336	5.51834	6.67238	7.32277
TraesCS4A02G252900	C3	1.07969	3.39199	5.5498	13.2146	11.277
TraesCS4B02G062600	C3	1.95691	3.41521	6.63793	11.3656	8.16778
TraesCS3A02G053300	C4	3.87738	3.06784	2.47622	4.30944	3.92948
TraesCS1A02G352200	C3	0.046614	0	0.107929	2.67317	1.09682
TraesCS5A02G118800	C3	2.30101	4.60683	6.97999	8.81144	7.32532
TraesCS7A02G478600	C4	7.62397	3.27134	5.84921	6.78902	7.6522
TraesCS5D02G007100	C4	0	0.0106486	0.0465858	0.86633	1.1484
TraesCS1A02G016900	C2	4.98199	9.14775	16.4341	14.3172	12.7223
TraesCS3B02G252200	C2	8.72613	6.51626	19.9117	17.1296	17.9662
TraesCS6D02G139700	C4	0.355366	0.109876	0.106978	1.01315	1.14778
TraesCS7D02G488800	C4	0.703253	1.8369	1.1988	6.22242	6.70095
TraesCS2B02G119700	C2	22.9917	20.66	22.8034	26.6036	13.9873
TraesCS2D02G102100	C2	18.4911	16.7723	20.7461	25.0934	12.2503
TraesCS1A02G203600	C3	1.8326	2.60201	1.00344	13.3984	9.38711
TraesCS5D02G478900	C4	3.1885	2.1248	2.02577	2.86569	3.24047
TraesCS3D02G068900	C2	22.9957	28.1565	68.3352	56.1973	47.7519
TraesCS5D02G039900	C4	1.11385	0.415038	0.494073	1.47365	2.04743
TraesCS1B02G098700	C3	2.22883	0.97896	0.5124	6.43384	4.1857
TraesCS7D02G374400	C3	0.828621	1.17044	1.38283	3.23775	2.92043
TraesCS4D02G113100	C3	0.0133021	0.782348	0.338278	1.07571	0.813356
TraesCS1A02G356900	C4	0.330519	0.330131	0.0395027	1.45161	1.61079
TraesCS1B02G373100	C4	0.016259	0.0669234	0.0203032	1.21558	1.71323
TraesCS1D02G361000	C3	0.322568	0.2285	0.709447	8.09767	7.44262
TraesCS2B02G278700	C3	9.08127	16.4838	23.4365	32.2355	28.9875
TraesCS4B02G379300	C4	19.8575	19.9387	39.7333	56.6097	107.732
TraesCS5A02G545600	C4	14.4752	21.2091	33.982	50.6557	88.8312
TraesCSU02G129600	C4	9.89044	12.0801	16.285	26.4829	42.8142
TraesCS6A02G098500	C4	0.225624	0.139502	1.60592	4.81455	5.47787
TraesCS3A02G125300	C3	0.0365423	0.683073	0.241749	3.14824	0.775633
TraesCS7A02G128300	C2	4.81737	6.40082	19.8162	13.4074	12.1567
TraesCS7A02G076400	C4	14.2097	7.47066	9.88216	14.4803	21.1851
TraesCS7D02G072100	C4	16.4395	9.82604	12.8983	15.9746	24.9683
TraesCS6B02G231000	C4	9.17128	5.16748	8.73175	10.3839	9.74645
TraesCS2D02G173900	C4	32.963	25.9409	43.2412	57.2152	77.4414
TraesCS5D02G141900	C4	0.131141	0.155685	0	0.1603	1.04389
TraesCS3A02G492400	C4	1.86712	3.51148	1.61751	3.815	5.58975
TraesCS3B02G280800	C2	5.12461	10.4533	17.0001	16.915	13.5717
TraesCS1B02G342400	C4	14.1813	6.90821	12.8185	12.2517	13.7414
TraesCS1A02G292200	C4	5.06673	1.90838	4.44281	5.71422	7.85355
TraesCS1B02G301600	C4	5.77563	3.35692	5.10624	5.47817	6.92598
TraesCS1D02G290700	C4	4.54854	1.77524	4.9555	5.86521	6.61895
TraesCS2D02G207400	C2	13.6628	9.35864	13.369	14.5924	11.2379
TraesCS2A02G239900	C3	2.65001	5.80909	11.4093	15.7451	12.2251
TraesCS5B02G036800	C3	0.198172	0.224685	0.294496	1.2354	0.991816
TraesCS2A02G357800	C4	4.41984	1.92352	2.83827	3.84685	4.27216
TraesCS2B02G191800	C3	2.41253	7.58934	17.3439	18.3356	18.5344
TraesCS2B02G240900	C4	0.108337	0.429385	0.281722	0.697044	1.09176
TraesCS2B02G241700	C3	0.527343	0.502005	0.867173	4.95705	4.51263
TraesCS2B02G241800	C3	0.437766	3.15632	3.73511	6.42155	4.07654
TraesCS2B02G242100	C3	1.14167	7.1923	6.52489	11.0027	9.924
TraesCS5A02G338200	C4	0	0	0	0.93307	1.27111
TraesCS7D02G304200	C3	0.599911	0.877739	1.26734	2.02038	1.58619
TraesCS7A02G213000	C2	3.02336	1.82964	4.59122	4.76926	2.95823
TraesCS7D02G214900	C2	5.47269	3.60771	5.30966	5.84058	3.17337
TraesCS3B02G475600	C4	1.23241	2.76483	3.07717	4.14921	7.46462
TraesCS3D02G434500	C4	3.20721	2.6986	2.74235	3.73402	6.22147
TraesCS4A02G099000	C2	0.542701	9.20583	20.4866	2.19809	0.66189
TraesCS4B02G205300	C2	0.0245426	0.771745	1.28534	0.288586	0.0284147
TraesCS7B02G392900	C3	0.0724083	0.0535963	0.136284	1.66317	0.696407
TraesCS6A02G169200	C3	1.51726	2.46124	12.7475	20.0161	15.9385
TraesCS3B02G000600	C3	0.228104	0.0169611	0.340378	2.37348	1.76231
TraesCSU02G038900	C3	0.466731	0.00980552	3.15377	12.3922	8.57508
TraesCS5A02G090500	C2	6.45297	2.77473	10.6445	7.62078	6.2311
TraesCS5B02G096200	C2	4.00701	2.09693	8.58093	5.51027	4.67327
TraesCS5D02G102600	C2	1.88508	1.52285	6.98414	5.40436	5.46872
TraesCS5D02G261000	C3	0.068678	0.955626	2.54268	25.8742	21.1358
TraesCS3A02G359400	C2	90.2592	21.1849	114.841	113.932	104.356
TraesCS5D02G080500	C2	5.82019	13.5435	21.1839	14.3808	12.1422
TraesCS4B02G356800	C3	0.0128578	16.8543	18.8628	38.9094	26.6287
TraesCS4D02G350500	C3	0.0583089	9.7996	5.14538	18.7365	13.6594
TraesCS5A02G526200	C3	0.0240031	5.82561	3.56325	34.7584	20.427
TraesCS2A02G143500	C3	1.17894	0.796676	0.709228	1.73019	1.07285
TraesCS2A02G143600	C4	0.019811	0	0.933134	5.37949	5.45571
TraesCS2D02G147200	C4	0.100404	0	1.76979	2.66671	3.6705
TraesCS4B02G222200	C3	0.156473	0.0137743	0.189346	1.48775	0.630213
TraesCS1B02G321000	C2	4.67957	1.69751	12.7992	9.91489	8.16496
TraesCS2D02G401700	C2	17.6763	7.5097	32.2116	27.1908	20.9301
TraesCS4A02G199600	C4	19.4125	33.4534	46.2394	55.7953	68.619
TraesCS2B02G432000	C3	0.514858	0.148169	0.629169	1.17272	0.796113
TraesCS5A02G487300	C3	0.0434967	0.124038	11.31	28.2354	13.6159
TraesCS5B02G501100	C3	0.0392953	0.0154579	0.607759	7.70705	4.91408
TraesCS5D02G501600	C3	0.0809998	0.0292998	6.19258	19.5623	11.4468
TraesCS1B02G064800	C4	0.0124767	0.013703	0.0950264	1.04044	1.1039
TraesCS1B02G130000	C3	0.0755829	1.74177	1.79646	3.2927	1.44186
TraesCS2B02G533200	C4	1.54589	2.04883	2.10276	8.69764	13.8619
TraesCS6A02G177300	C4	0.91576	0.491965	2.92502	5.30132	8.37295
TraesCS6B02G207300	C4	0.086146	0.533602	0.746165	0.939332	2.04175
TraesCS6D02G166900	C4	0.455252	2.98716	1.11055	2.63563	6.7713
TraesCS5A02G397800	C4	20.1162	5.34788	2.1588	21.077	23.9758
TraesCS2A02G013200	C2	0.957415	10.0567	23.3322	16.7523	10.3492
TraesCS2B02G004400	C2	0.122222	1.02707	5.44012	2.39923	1.56588
TraesCS6B02G212400	C4	0	0.0201525	0.231774	1.09618	1.69464
TraesCS6D02G170900	C4	0.0644808	0	1.34071	4.65239	7.04296
TraesCS7A02G277500	C3	0.0111113	0	0.501331	1.14416	0.642793
TraesCS7D02G397000	C2	0	0	1.19687	0.515553	0.165415
TraesCS3D02G416600	C2	15.807	17.3108	45.3751	9.29408	2.7419
TraesCS4B02G347300	C3	1.8298	5.81163	9.9126	10.6419	8.37854
TraesCS4D02G342300	C2	1.37682	4.31336	9.11469	7.82333	6.95578
TraesCS4A02G261000	C4	37.7331	23.3256	119.313	112.103	157.061
TraesCS4B02G053600	C4	30.887	20.3528	96.4658	85.1656	119.787
TraesCS4D02G053600	C4	34.0151	24.3209	106.594	94.6749	132.399
TraesCS1B02G225600	C4	1.94045	3.06273	4.7385	5.85651	7.46965
TraesCS3A02G226600	C3	0	0.245462	0.19814	1.01024	0.583449
TraesCS7D02G342200	C3	0.28984	1.14647	3.42691	7.56824	7.55814
TraesCS2D02G549100	C4	39.236	22.7168	20.9387	34.7295	43.2417
TraesCS7A02G446200	C4	0.0605226	0.228303	3.25165	9.89473	10.8002
TraesCS1A02G395800	C3	0	0.0584672	0	2.84323	0.270358
TraesCS2A02G395000	C4	0.0642144	1.80627	0.234809	2.67586	7.85282
TraesCS5A02G515600	C4	1.05072	0.380014	0.188767	1.58886	1.31941
TraesCS5D02G324700	C3	2.98609	4.33691	7.74026	9.94314	9.75872
TraesCS5A02G311300	C3	0.229114	0	0.0503292	1.18199	0.455801
TraesCS3D02G252500	C4	0.790107	1.27972	1.17676	1.61301	2.5426
TraesCS7B02G146800	C4	0.0798731	0.638939	0.656399	0.914198	2.41586
TraesCS7D02G243300	C4	0.211567	0.142131	4.84799	5.24941	6.7728
TraesCS5A02G368800	C4	0.383992	0.522182	1.16327	2.46221	2.71457
TraesCS5D02G378100	C3	0.397944	1.42974	2.23001	4.78114	4.13265
TraesCS5B02G350400	C3	2.04569	1.54811	2.44885	3.91081	3.06877
TraesCS5B02G350500	C2	0.510616	0.957494	1.68246	1.43379	1.80371
TraesCS7B02G030600	C3	0	1.02133	1.58022	12.2611	6.73378
TraesCS7D02G129700	C3	0.140133	1.21851	0.17043	1.99831	1.20093
TraesCS7D02G272900	C4	0.158654	0	0	1.09264	1.3769
TraesCS3A02G499200	C3	0	0.398672	0.493823	7.18129	2.23674
TraesCS3B02G562400	C3	0.0597249	0.276482	1.60837	11.3513	4.66583
TraesCS3B02G562500	C3	0.0428523	3.04072	3.1269	10.0573	7.10091
TraesCS3D02G506100	C3	0	0.0820681	1.9038	15.4006	6.06066
TraesCS5B02G522900	C2	0.276198	0.18023	1.22539	0.768378	1.12737
TraesCS1B02G213100	C3	0	0	0.0351597	2.04793	0.449291
TraesCS1A02G255800	C2	0.974364	0.448601	2.69144	1.34608	0.717937
TraesCS6D02G182600	C2	2.74641	5.83034	9.90866	7.18212	5.79382
TraesCS1B02G186800	C2	33.5949	19.1927	55.8351	32.0437	26.1141
TraesCS1D02G167800	C2	28.1878	11.4294	46.5178	31.5132	24.3361
TraesCS7B02G278800	C3	3.64747	12.7323	13.1873	24.2094	27.5241
TraesCS5D02G439100	C4	73.4586	107.433	176.211	205.114	278.934
TraesCS7A02G276800	C3	0.538163	2.28033	2.25491	4.20249	3.22086
TraesCS1A02G311200	C2	0.626631	2.60723	3.51974	0.991147	0.572712
TraesCS3A02G331200	C2	6.43532	2.55632	11.7302	2.99939	5.34701
TraesCS2A02G099400	C4	0.016304	0.0974911	1.25323	4.4251	4.96139
TraesCS2D02G098700	C4	0.204447	0	0.522311	3.33462	3.53633
TraesCS4A02G128900	C4	0.849978	0.0429765	3.95852	6.27673	10.3803
TraesCS4B02G175800	C4	0.835396	0.335971	3.0242	6.59063	8.59373
TraesCS2B02G015500	C2	2.46758	1.58956	2.41976	2.63407	2.28482
TraesCS2B02G133000	C4	0.328313	0.11687	0.0428205	0.44059	1.12597
TraesCS4D02G036000	C4	4.23673	3.09648	3.93414	9.89373	13.1892
TraesCS5A02G131000	C3	0.53384	2.12961	3.86166	4.38918	3.07035
TraesCS7A02G318800	C4	16.3293	12.0234	20.4965	22.9916	26.9248
TraesCS1D02G383500	C4	6.12886	3.86813	8.08726	8.82541	10.8773
TraesCS7A02G204000	C2	7.698	5.18592	11.78	9.11408	7.78545
TraesCS7B02G111000	C2	10.9542	6.66946	15.2435	12.0711	11.2237
TraesCS7D02G207100	C2	11.0998	6.28902	13.5231	11.0832	8.85744
TraesCS4B02G090100	C4	2.83595	1.51051	2.85448	3.66549	5.11424
TraesCS2A02G451100	C4	5.40344	3.0616	3.55518	5.56904	5.91299
TraesCS7A02G075600	C4	0.397277	0.118435	0.326738	0.277645	1.06953
TraesCS6D02G316000	C2	2.51748	1.39735	4.43006	3.26876	3.25201
TraesCS6A02G330500	C4	0.157254	0.285085	2.46304	2.35397	3.02367
TraesCS5B02G001600	C3	1.8191	5.42943	9.36771	9.86978	8.86502
TraesCS6B02G356900	C2	0.926186	1.72489	3.9879	3.30599	3.04743
TraesCS4A02G417000	C2	6.86943	22.2842	42.1887	12.9686	14.4219
TraesCS7A02G071600	C2	6.35867	20.0012	37.056	13.8104	18.2225
TraesCS4A02G034400	C4	0.1204	0	0	1.14231	1.77058
TraesCS5D02G450900	C3	0	0	0.022163	4.23021	1.69644
TraesCS6A02G235800	C2	1.36468	7.68392	11.3246	5.4913	1.65258
TraesCS1A02G212600	C3	16.4431	27.7657	98.8505	144.625	45.8527
TraesCS1B02G225900	C3	0.0444039	0.244162	10.778	213.688	35.0054
TraesCS1B02G226000	C3	0.0429954	0.0221216	0.350285	9.67359	2.15272
TraesCS1B02G226100	C3	7.09926	29.176	80.3811	171.227	46.7558
TraesCS1D02G215400	C3	0	0.157835	0.625884	38.5942	6.71793
TraesCS1D02G215500	C3	13.9642	85.8517	168.168	314.767	119.413
TraesCS2D02G459300	C4	0	0	0	1.93174	2.86717
TraesCS4D02G160300	C3	0.822038	2.43193	4.84724	4.94519	3.8056
TraesCS7D02G289700	C3	4.49637	3.0089	4.38024	5.64796	5.04454
TraesCS6A02G280100	C3	0.0836063	0.62786	0.381647	4.14487	1.17883
TraesCS6D02G260300	C3	0.582141	0.705074	1.90822	27.7252	7.50649
TraesCS4A02G182700	C2	1.46413	3.23369	7.41005	2.28132	1.94969
TraesCS4B02G135900	C2	2.118	2.41527	6.02904	1.67957	1.84133
TraesCS4D02G130700	C2	2.35192	3.5247	8.17519	1.38052	1.52208
TraesCS3A02G520000	C3	1.03252	2.33632	2.79261	3.91707	3.06724
TraesCS1B02G006400	C4	0.0319361	0.43287	0.722766	1.01797	1.33526
TraesCS6D02G346000	C2	1.60289	1.30629	1.76245	1.40403	1.17078
TraesCS7D02G177500	C4	6.45177	4.74023	8.58075	9.80196	13.0616
TraesCS1B02G231300	C3	6.13726	4.73171	9.3051	11.8617	11.3436
TraesCS3A02G435400	C4	16.6824	17.2233	32.0296	50.6102	60.8381
TraesCS3D02G428200	C4	13.6153	12.4086	28.1337	43.4236	49.379
TraesCS4B02G297500	C4	11.632	6.57036	7.68029	26.132	23.9234
TraesCS5A02G152400	C2	30.3167	94.0286	203.077	108.45	120.431
TraesCS5B02G151000	C2	35.4426	46.6213	161.996	106.247	117.736
TraesCS6A02G069400	C4	3.69882	3.40005	7.47407	8.7536	10.1885
TraesCS6B02G093700	C4	2.89609	3.65626	7.35957	9.52981	12.7755
TraesCS2A02G281200	C4	0.220411	0.9658	0.615002	2.18051	2.34354
TraesCS7A02G213800	C4	0.0185974	0.185426	1.47401	12.4666	35.5908
TraesCS7D02G215900	C4	14.1823	70.7801	76.6658	113.347	198.905
TraesCS5A02G252900	C4	1.03144	1.92431	2.49365	4.09613	4.53875
TraesCS5D02G287800	C3	4.31944	13.6058	15.4742	34.3249	20.7642
TraesCS1B02G425000	C3	11.2441	8.35948	6.33732	16.9495	8.44672
TraesCS3A02G246600	C3	0.1425	0.186819	0.237913	4.13417	2.45669
TraesCS1A02G044600	C4	6.30501	5.38119	8.06925	13.1504	12.8279
TraesCS1B02G057900	C4	10.2806	7.06714	7.0524	10.0402	14.7456
TraesCS1D02G045200	C3	11.5342	6.94043	10.4099	15.1733	13.119
TraesCS7A02G276900	C4	2.40942	3.12332	3.29077	5.87287	11.4285
TraesCS2A02G022000	C4	6.15002	7.88974	13.8145	17.0071	21.8952
TraesCS2D02G022800	C4	14.0563	9.52038	15.5087	18.2675	19.2852
TraesCS2A02G232900	C3	0.773509	1.36114	3.86857	5.39142	2.80506
TraesCS2B02G250400	C3	0.05646	0.350714	0.385866	1.23658	0.449069
TraesCS2D02G232600	C3	0.711245	1.67618	6.37192	7.04758	4.66878
TraesCS2A02G097700	C4	0.713512	0.0913164	0.138244	0.618055	1.31299
TraesCS5B02G164900	C4	59.7638	38.5037	48.5633	77.203	121.995
TraesCS1D02G282900	C4	47.8413	28.2588	41.783	50.083	56.0105
TraesCS5B02G523800	C4	0.0772202	0.568575	0.599648	0.973306	1.23835
TraesCS5B02G524200	C3	2.30065	2.25124	4.45382	5.37728	4.93485
TraesCS3A02G406200	C2	0.196091	0.79978	2.92392	1.43641	1.8288
TraesCS4A02G262600	C3	0.777685	0.0560488	8.64925	16.4837	10.9845
TraesCS4B02G052300	C3	0.418432	5.96371	20.0529	39.1398	26.8574
TraesCS4D02G052500	C3	8.37739	3.63003	21.6926	30.2812	19.0178
TraesCS4A02G361900	C4	17.7424	12.9225	17.2337	27.5357	33.9621
TraesCS5B02G510900	C4	25.8378	14.3782	19.3739	32.898	27.3526
TraesCS5B02G127500	C3	0.686432	0.264224	1.00644	2.21963	2.02232
TraesCS2B02G346900	C2	1.5528	0.532793	7.4777	5.92548	5.5843
TraesCS5A02G227000	C2	0.343137	0.355803	11.0024	6.35107	7.10833
TraesCS5B02G225600	C2	0	0.0403374	13.3962	10.426	6.57104
TraesCS3A02G370300	C3	0.0725425	0	0.151853	4.54166	2.84551
TraesCS2D02G493100	C4	11.2351	22.6625	23.7199	32.4306	40.8355
TraesCS7B02G229500	C2	0.490142	2.82912	6.80324	5.32201	4.33708
TraesCS7B02G183800	C4	32.4097	16.7351	30.7769	27.3633	33.24
TraesCS6A02G068300	C4	12.8009	84.6637	95.6786	185.888	283.314
TraesCS6B02G092200	C4	38.3219	159.729	184.945	193.3	286.805
TraesCS1B02G350700	C3	10.8804	21.7535	14.1212	40.5203	16.0872
TraesCS6B02G272800	C4	4.77103	3.42568	5.20306	7.52223	8.89701
TraesCS6A02G382900	C3	0.289832	0.0307801	2.55651	66.3955	28.707
TraesCS2B02G528300	C3	7.45802	3.90554	10.6623	19.875	16.5785
TraesCS1B02G418500	C3	0.26744	0.270691	1.20078	1.99334	1.7761
TraesCS2B02G285400	C3	0.1245	0.424711	0.750013	1.16608	1.00924
TraesCS2B02G324200	C4	0.360803	1.70223	5.04128	10.6808	14.3805
TraesCS3A02G247300	C3	8.03446	9.48423	10.3745	24.1922	17.5861
TraesCS3A02G205100	C2	0.644848	0.634218	2.18481	1.19527	1.02409
TraesCS5B02G264500	C4	1.86406	1.41845	1.90611	2.61136	4.14399
TraesCS5B02G501700	C3	0.104467	0.125368	0.702399	1.59015	1.32853
TraesCS4A02G058700	C3	0.0169436	0.210255	0.885483	6.35721	4.30625
TraesCS4B02G246000	C3	0.0675585	0.248186	3.48181	16.2345	8.85065
TraesCS4D02G245400	C3	0.0818271	0.994672	2.93697	14.7444	7.88311
TraesCS7A02G324800	C3	0.0436357	0.0982886	0.420147	1.06203	0.482262
TraesCS7B02G225300	C2	0.256782	1.18041	3.76286	4.01279	2.17466
TraesCS7D02G321200	C2	0.0499339	0.44187	4.68377	5.28446	2.75316
TraesCS3D02G225400	C3	0	0	0.0242691	1.76418	0.641259
TraesCS3B02G400000	C4	3.70219	1.0225	1.43469	3.85703	3.24613
TraesCS1A02G103000	C3	0	0.104207	0.0537397	1.82693	1.41375
TraesCS3B02G490600	C2	21.1221	22.8632	41.0455	33.5334	18.4004
TraesCS4B02G059100	C3	0.441165	11.3607	11.355	28.3443	16.9609
TraesCS5D02G563900	C3	9.95374	25.3617	24.3015	40.3673	36.0531
TraesCS3B02G535300	C4	0.142435	0.0341626	1.99098	12.5025	13.6804
TraesCS3B02G539100	C3	0	0	0.647129	3.21597	1.95881
TraesCS3D02G487300	C3	0.15263	0.0834304	17.9404	28.2268	18.4886
TraesCSU02G035200	C3	1.09626	6.6949	23.6697	29.8544	29.0164
TraesCS2A02G159700	C4	33.1052	18.4638	22.306	32.6812	35.2165
TraesCS2B02G185300	C4	23.8827	14.7139	19.2428	27.2338	30.168
TraesCS2D02G166900	C4	25.566	16.6932	22.0585	28.3037	31.6954
TraesCS5D02G413300	C3	0.120761	0.679717	0.616456	1.29992	0.94374
TraesCS6B02G354900	C3	0.805341	2.71159	4.76746	6.32341	3.58811
TraesCS4B02G084700	C3	17.6614	32.4844	45.9646	69.3331	68.7399
TraesCS7A02G339000	C2	1.67351	9.55454	44.0272	25.1028	35.8863
TraesCS7D02G004100	C3	2.69088	11.242	14.2441	25.3501	21.2694
TraesCS5B02G571000	C3	0.0129165	0.998655	2.23097	11.1408	4.65364
TraesCS4B02G134000	C2	12.3211	37.7253	105.012	86.579	82.6136
TraesCS7A02G074700	C2	16.9761	16.6432	22.2811	14.4492	12.458
TraesCS6B02G302500	C4	17.4256	22.5421	11.6465	21.8062	22.851
TraesCS5B02G395400	C4	118.219	53.797	129.741	137.544	158.864
TraesCS6D02G235400	C2	227.148	105.287	230.211	203.58	218.013
TraesCS6B02G218500	C2	1.55799	4.12401	9.12467	8.31362	6.16284
TraesCS3B02G343000	C2	1.76856	6.59647	34.7486	1.31682	0.607336
TraesCS3D02G184200	C3	0.517037	1.99624	2.69488	3.38838	2.70151
TraesCS2D02G119100	C4	3.51075	0.02455	0.0263826	3.9492	8.16661
TraesCS2B02G050400	C3	14.1251	14.6553	9.31289	21.2544	16.9407
TraesCS6A02G098800	C4	4.26424	2.69616	3.43431	4.19294	4.03526
TraesCS3B02G568300	C2	1.37147	65.5215	206.405	74.4695	43.6181
TraesCS4B02G383300	C2	0.132362	1.52488	8.42126	3.72177	3.08429
TraesCS5A02G548700	C2	0.145141	4.70398	9.62541	1.27327	0.830865
TraesCSU02G127300	C2	0.748102	12.7526	38.913	6.1998	3.7491
TraesCS5A02G260600	C4	485.726	485.082	547.251	894.757	1553.37
TraesCS7A02G388800	C4	0.0162078	0.404526	0.343773	1.1867	1.92949
TraesCS7D02G488600	C2	28.3048	15.3991	34.1584	30.6719	26.4901
TraesCS1B02G386700	C2	37.9723	11.7423	65.2488	52.8982	50.1755
TraesCS1B02G317200	C2	19.278	7.40999	22.0315	20.4703	17.9928
TraesCS7B02G090700	C3	33.4993	22.0288	29.8937	37.583	32.4107
TraesCS4D02G223600	C3	5.85498	2.92069	8.63207	10.3265	8.08542
TraesCS4A02G198800	C3	0.210762	0.164558	0.0847475	2.28744	0.386847
TraesCS4D02G114200	C3	0.275336	0.221186	0.219264	1.78865	0.404672
TraesCS7D02G068300	C3	0.365502	1.31744	0.818328	2.83323	2.54628
TraesCS5A02G058600	C3	13.3331	12.8607	25.2193	45.0224	40.1291
TraesCS5B02G058500	C4	17.6561	22.0122	23.3981	55.2307	60.4397
TraesCS5D02G069300	C3	16.453	27.2823	57.5883	97.7833	91.7541
TraesCS3A02G276500	C4	0.762984	3.05791	1.93895	12.3595	14.9874
TraesCS3D02G276600	C4	0.923962	7.13028	6.13048	14.6944	17.1393
TraesCS1A02G122600	C4	0.544139	0.0980649	1.03119	1.4173	1.69906
TraesCS1D02G123500	C4	0.314628	0.0807496	0.782024	0.832135	1.2993
TraesCS3A02G108400	C4	0.0645982	0.619419	2.63175	7.04238	11.8346
TraesCS2A02G563500	C2	16.2846	9.28664	16.9469	15.4562	12.9539
TraesCS4A02G222900	C3	0.516377	1.88634	3.08727	4.8173	3.3254
TraesCS4B02G093500	C3	0.612879	0.802189	2.14466	6.0734	3.80007
TraesCS1D02G361500	C3	0.354336	0.891853	1.0858	1.65575	0.994248
TraesCS3B02G385100	C3	12.4159	9.65406	22.8043	45.6407	37.1175
TraesCS3D02G346500	C4	8.41608	7.89922	5.02025	8.80937	9.86946
TraesCS7B02G218800	C4	5.16225	2.97159	2.58522	6.06633	9.03592
TraesCSU02G104800	C4	4.4007	3.1019	5.18046	11.5993	14.6265
TraesCS3B02G127100	C2	0.160209	0.0567184	1.89456	0.575166	1.2401
TraesCS5D02G037300	C4	19.3794	5.11757	6.9197	16.1871	18.4626
TraesCS5B02G128200	C4	11.2519	2.67768	6.01637	16.1193	21.7248
TraesCS1A02G125400	C3	0.577836	1.44832	2.84317	3.80618	3.15052
TraesCS1D02G128400	C3	0.130061	0.419472	0.757763	1.35333	0.827967
TraesCS5B02G264800	C4	1.3519	0.353635	0.434016	1.33778	2.3255
TraesCS2B02G096700	C3	0.017994	1.62266	2.42708	3.57386	1.93799
TraesCS2D02G080400	C2	0.0161946	1.48484	2.91948	2.1703	1.39686
TraesCS1A02G247100	C3	2.7068	4.0526	8.85412	11.3488	10.252
TraesCS4A02G025300	C3	1.7895	0.146097	1.99286	14.4651	4.62651
TraesCS1A02G394500	C4	9.66189	7.71515	15.8752	16.1479	17.2084
TraesCS1A02G245000	C2	8.13326	5.58428	8.12061	7.83495	7.73686
TraesCS1B02G256200	C2	8.39006	4.92624	8.00078	7.52336	8.17382
TraesCS3B02G288800	C4	10.177	9.4897	22.0406	24.3305	33.601
TraesCS3D02G253600	C4	13.6135	6.2323	21.7863	24.0812	30.0502
TraesCS6A02G379000	C2	7.69938	2.11875	14.8931	9.36865	8.66205
TraesCS2B02G293400	C2	10.6949	5.84715	20.0365	13.9044	12.3943
TraesCS2D02G274700	C2	9.35417	4.16858	15.0534	10.4658	8.88492
TraesCS5B02G074200	C2	2.63388	0.499419	3.50676	2.75389	2.14465
TraesCS5B02G037500	C2	6.93289	3.29533	15.2672	10.9691	8.28903
TraesCS2A02G480500	C2	13.9712	9.06027	17.7523	13.9074	12.3626
TraesCS2B02G505400	C2	11.9723	7.92183	18.2602	12.5485	11.0012
TraesCS6A02G115800	C4	13.3933	14.0308	17.9934	21.0549	33.7916
TraesCS6A02G239100	C2	7.01972	6.89701	18.3448	14.6714	14.3953
TraesCS6D02G221400	C2	6.79383	5.27231	15.2071	11.8912	10.6571
TraesCS7B02G423100	C3	5.12696	4.21145	6.12977	10.2361	7.79372
TraesCS5B02G559300	C4	19.4649	23.5445	45.3324	61.5014	101.199
TraesCS2A02G538600	C4	1.00521	0.671584	0.837419	1.38119	2.15865
TraesCS3D02G237900	C2	25.37	15.3577	24.1327	23.9015	21.7556
TraesCS1A02G077800	C4	4.588	5.9641	21.4017	35.7335	72.8805
TraesCS1B02G095900	C4	3.59284	7.29656	21.3421	23.6381	52.2489
TraesCS1D02G079900	C4	7.40496	6.32643	51.8238	51.2787	93.7659
TraesCS4A02G235100	C3	0.113533	0	4.40018	15.5788	8.1783
TraesCS1A02G111700	C3	0.0492382	0	1.94333	2.78372	2.3222
TraesCS1B02G131900	C3	0.354347	0.094791	7.41243	10.1017	9.13843
TraesCS1D02G113100	C3	0.318321	0.0802866	4.11963	5.64892	3.95894
TraesCS6A02G171200	C3	2.13727	1.87011	4.25604	7.65855	6.18126
TraesCS3B02G298100	C3	0.900785	0.456656	1.24443	2.13315	1.57092
TraesCS5D02G568500	C4	2.0684	2.11297	1.06148	2.70903	2.98809
TraesCS5A02G261600	C3	0.0396736	0.605695	0.746072	1.35384	0.96217
TraesCS5A02G378700	C3	2.39701	0.400971	3.18954	28.6936	3.64839
TraesCS5B02G382600	C4	0.489271	0.0500378	0.962739	23.3285	32.2203
TraesCS4A02G009400	C3	0.979804	2.93925	3.19321	4.36062	3.65698
TraesCS1B02G186100	C4	3.2982	1.74296	1.96451	3.2442	3.29788
TraesCS3A02G242700	C4	0.154155	0	0.726617	1.02697	1.78491
TraesCS3D02G124800	C2	5.32039	4.57923	14.9483	12.2886	10.8013
TraesCS6A02G168900	C3	1.25548	2.18552	1.4834	3.45852	3.48389
TraesCS2D02G098100	C4	3.22812	2.15864	3.14315	3.86787	4.24664
TraesCS2D02G231000	C3	1.30629	2.78178	3.23225	4.46977	3.80323
TraesCS1A02G256800	C2	19.0223	7.71467	19.1513	15.5894	13.8727
TraesCS2B02G277400	C3	0.542672	1.45039	1.68148	2.46979	2.24238
TraesCS3B02G304300	C3	1.85376	3.76386	5.40551	7.54034	3.69872
TraesCS3D02G270300	C3	2.268	4.02034	6.11243	7.99384	4.01602
TraesCS2A02G239000	C4	1.72692	2.17937	3.97774	4.59474	5.25447
TraesCS5D02G179600	C4	6.92248	3.41057	6.38011	7.97076	8.54611
TraesCS3A02G220300	C3	1.85432	1.31644	2.05252	3.39743	2.27044
TraesCS3B02G104500	C4	1.82457	1.16447	1.31838	2.92048	5.09836
TraesCS3A02G086700	C2	24.7613	27.5205	31.3744	33.8874	18.609
TraesCS7A02G017400	C2	1.17381	0.716189	1.16748	1.16005	0.763729
TraesCS7A02G357800	C3	2.10726	5.89507	1.8015	23.9599	4.69865
TraesCS1A02G005800	C2	31.2574	12.195	36.4811	28.5513	24.9815
TraesCS3A02G500600	C4	7.40848	5.72804	15.5536	21.3211	25.1047
TraesCS3D02G507500	C4	2.40861	3.9182	7.70861	9.55226	11.5074
TraesCS7A02G140800	C4	4.76286	4.78162	13.995	16.9942	20.4876
TraesCS2A02G588100	C4	0.393592	0.119917	0.625534	1.03148	1.30964
TraesCS2D02G565100	C4	1.3259	0.0879826	0.45328	0.714644	1.44957
TraesCS4A02G218100	C3	1.05396	7.13855	12.1389	17.9684	14.9898
TraesCS4D02G093200	C3	2.11025	2.97083	5.40415	8.29819	7.67185
TraesCS1A02G013800	C4	1.85843	0.621448	1.05074	2.86025	6.07395
TraesCS4D02G269900	C4	3.99614	5.84947	1.79369	6.90135	7.08093
TraesCS6A02G362600	C3	0.0154679	0.620993	0.554485	1.41658	1.41317
TraesCS6B02G396200	C3	0.466347	1.58845	2.07202	4.31002	4.00446
TraesCS1A02G173400	C4	221.698	139.611	145.846	200.41	215.935
TraesCS1B02G191000	C4	109.587	79.1882	99.0225	154.469	199.25
TraesCS1D02G165400	C4	143.833	95.4296	146.224	236.321	297.556
TraesCS1A02G135100	C2	2.3655	3.15357	9.04352	6.03044	5.31376
TraesCS1B02G149700	C2	4.84136	4.28203	14.8948	10.7594	10.1501
TraesCS2B02G267000	C4	1.32207	0.858753	1.20894	1.82458	2.17072
TraesCS2A02G189200	C4	0.573329	1.75043	2.24463	2.14196	3.73434
TraesCS3A02G355500	C2	3.10038	1.79956	8.28719	8.33287	8.66374
TraesCS3B02G388400	C2	4.12704	3.21453	20.3626	18.6934	17.3536
TraesCS1D02G074400	C4	46.0594	22.9639	17.2415	33.2112	47.9295
TraesCS2D02G361600	C4	0.134941	0.0179846	0.0579814	0.37516	1.84343
TraesCS3B02G217100	C4	0.32043	0.342742	3.30253	3.1341	4.33339
TraesCS3D02G191400	C4	0.513657	3.38592	4.73737	7.17084	11.1656
TraesCS1A02G008100	C3	0.273423	0.883107	1.35838	1.59849	1.3649
TraesCS1A02G020000	C3	0	0	0	7.49132	3.47429
TraesCS1A02G025800	C3	0.0881164	0.0374318	0.218335	1.64305	0.777465
TraesCS1A02G026000	C3	0.714015	0.528178	1.44895	1.99057	1.51631
TraesCS1A02G026400	C3	2.68752	5.50889	9.90676	11.343	10.4781
TraesCS1A02G033100	C4	20.9204	15.9149	27.2028	38.9267	58.4859
TraesCS1A02G051700	C2	21.8636	43.9587	161.922	101.535	92.1449
TraesCS1A02G057300	C2	0.404716	0.852224	1.76458	1.6164	1.28806
TraesCS1A02G058700	C3	0.333981	0.133422	1.20508	3.82943	1.27149
TraesCS1A02G060600	C2	1.73296	1.5433	16.716	12.6403	16.4501
TraesCS1A02G074800	C4	18.861	7.6133	14.9629	19.6766	19.4644
TraesCS1A02G075800	C3	0.095835	0.132524	0.432221	0.983339	1.00663
TraesCS1A02G077000	C3	0	2.79149	2.31312	5.03129	3.49811
TraesCS1A02G082300	C3	0.0599199	0.100626	0.414017	8.91278	6.0546
TraesCS1A02G099100	C4	1.31981	0.289856	0.220542	2.46945	1.77764
TraesCS1A02G100400	C3	1.04918	2.6494	3.91479	5.22619	5.85487
TraesCS1A02G106200	C4	0.18273	0.36783	0.286961	0.965699	4.69859
TraesCS1A02G124200	C3	2.82764	6.12111	8.11644	19.3702	16.0987
TraesCS1A02G124500	C4	0.0724451	1.21824	1.41178	1.20512	4.17833
TraesCS1A02G126100	C4	0.0679841	1.0691	3.13246	5.49812	6.344
TraesCS1A02G140600	C3	0.197399	0.714317	0.81372	1.5574	1.11444
TraesCS1A02G142700	C3	5.26675	9.1629	11.6013	20.218	17.1691
TraesCS1A02G145600	C4	0.843331	0.717044	1.0248	1.83684	2.66263
TraesCS1A02G158600	C3	4.02545	2.0024	2.36392	7.24849	5.69583
TraesCS1A02G166600	C4	0.4461	2.81546	3.47133	17.888	23.7556
TraesCS1A02G179400	C3	1.75303	18.928	18.9356	46.0987	44.1408
TraesCS1A02G187800	C2	1.2025	2.33102	3.81182	3.18531	2.27305
TraesCS1A02G218300	C3	0.419344	0.334533	1.58276	5.05221	4.06894
TraesCS1A02G228800	C2	76.4072	48.6308	82.4621	55.2377	47.9793
TraesCS1A02G246100	C3	0.836363	1.84805	2.472	2.97984	2.82531
TraesCS1A02G257700	C2	0.242062	1.76536	3.70978	1.45591	0.275864
TraesCS1A02G263200	C2	11.7929	8.14811	14.9629	14.2978	15.0603
TraesCS1A02G275500	C4	1.40127	0	0.491287	1.81748	3.83501
TraesCS1A02G284900	C3	0	0.0981325	0.914437	46.3393	20.3719
TraesCS1A02G299400	C4	10.9842	8.87726	10.8571	15.3763	21.8323
TraesCS1A02G303900	C3	0.0986714	0.456211	1.25337	1.83833	1.9554
TraesCS1A02G309200	C3	2.23997	5.36479	5.48753	8.43891	8.11937
TraesCS1A02G320200	C3	0.140673	0.617716	8.4803	44.2582	37.012
TraesCS1A02G328400	C3	2.57132	1.73044	3.18913	4.35341	3.9183
TraesCS1A02G338500	C4	5.08332	2.92128	3.89248	6.14539	5.89049
TraesCS1A02G343200	C2	0.269228	0	1.83749	1.15711	0.453705
TraesCS1A02G353400	C3	0	0	0.533108	2.21022	2.14494
TraesCS1A02G355400	C2	3.58918	1.64138	11.1994	6.32348	5.48399
TraesCS1A02G379500	C4	2.77377	2.46211	5.24442	5.90008	6.65302
TraesCS1A02G388700	C2	0.646677	3.05233	8.56069	5.12666	3.09954
TraesCS1A02G416500	C4	2.53999	2.25716	5.05488	8.00496	11.0197
TraesCS1A02G426000	C4	0.34687	0.395138	0.427879	0.955313	1.6564
TraesCS1A02G429400	C4	47.8445	51.2365	66.1218	112.382	156.71
TraesCS1A02G436900	C4	0.212521	0.382506	1.22674	1.60582	2.02334
TraesCS1A02G441600	C3	8.82291	19.4849	23.4991	34.2066	29.4633
TraesCS1A02G445900	C4	10.7857	10.0819	20.4687	19.9402	23.0179
TraesCS1B02G005100	C3	0.861554	2.50091	3.55388	5.29769	3.96744
TraesCS1B02G031000	C4	0.980114	0.196722	0.551302	1.26441	1.4761
TraesCS1B02G041200	C4	30.3131	18.8135	24.1143	35.9861	49.9475
TraesCS1B02G042500	C4	0	0.0341951	0.151345	0.656812	1.05629
TraesCS1B02G043200	C4	0	0.0246948	0.0883143	7.94476	8.85333
TraesCS1B02G046800	C3	4.36113	3.90411	7.51526	11.5197	10.5289
TraesCS1B02G047300	C4	0	0	43.9607	91.3568	96.2723
TraesCS1B02G048800	C4	17.5251	12.8231	33.8953	47.8132	57.537
TraesCS1B02G062000	C4	0.712965	2.61571	4.56889	7.12378	8.83822
TraesCS1B02G073300	C3	0.161307	0.674856	0.738464	1.27135	1.02896
TraesCS1B02G088400	C4	1.10497	0.0813545	0.413437	1.24071	2.42046
TraesCS1B02G093400	C4	6.54128	5.05573	9.29255	16.0509	15.9921
TraesCS1B02G095100	C2	0.217996	1.43644	3.75806	2.39626	0.998153
TraesCS1B02G097900	C2	11.1061	11.2256	37.9056	30.6724	34.6678
TraesCS1B02G099900	C3	4.28172	1.10856	0.947739	7.5414	3.81872
TraesCS1B02G108500	C3	0.229426	0.581166	1.10071	1.18596	0.854762
TraesCS1B02G121600	C3	0	0	0.0364829	3.46195	1.06984
TraesCS1B02G123500	C4	0.0984807	0.091617	0.0586843	0.542885	2.08464
TraesCS1B02G132600	C4	2.69246	4.45229	2.33781	7.82717	10.0983
TraesCS1B02G133300	C3	0.091396	3.40927	10.2086	17.4734	8.7216
TraesCS1B02G137200	C4	21.0488	1.48526	9.54361	29.2718	62.6416
TraesCS1B02G145300	C3	0.49999	3.49306	4.22588	8.97722	8.93499
TraesCS1B02G148600	C3	6.37779	4.22532	9.31428	12.9748	5.63402
TraesCS1B02G159000	C4	1.45903	0.512404	1.59919	1.97406	2.71205
TraesCS1B02G165100	C3	0.927369	4.04451	5.18631	7.3919	4.00724
TraesCS1B02G189700	C2	2.1222	1.43563	5.66743	5.39217	5.66887
TraesCS1B02G212200	C3	1.88797	5.80173	3.61588	8.75552	5.80409
TraesCS1B02G232500	C3	0.222711	1.01253	1.01811	2.87396	2.89997
TraesCS1B02G263100	C3	0.230546	0.726659	7.77191	12.9138	12.4688
TraesCS1B02G264100	C2	0.579564	0.897059	2.28343	2.22161	1.12342
TraesCS1B02G281600	C4	0.790645	0.377712	0.717678	3.29227	3.6084
TraesCS1B02G284700	C4	0.764075	0.318294	2.00342	4.31803	8.40638
TraesCS1B02G289500	C4	4.62459	8.72223	25.7247	24.9417	31.5097
TraesCS1B02G289700	C4	12.1061	2.90225	16.0938	23.4386	21.1343
TraesCS1B02G302800	C3	0.393013	1.21634	1.23651	1.78558	2.06732
TraesCS1B02G305300	C4	4.16956	1.94918	1.92087	5.5357	6.82284
TraesCS1B02G310900	C4	4.66579	4.31254	5.7343	10.7123	11.5365
TraesCS1B02G326500	C4	2.02796	0.554611	5.22821	4.70275	6.82587
TraesCS1B02G332400	C3	0.421488	1.94465	22.2373	68.8925	63.9286
TraesCS1B02G356300	C2	2.32986	0.00964125	6.72209	5.19288	3.97667
TraesCS1B02G366500	C4	0	0	0.270552	1.62897	1.64236
TraesCS1B02G381700	C3	4.60543	16.4397	13.2963	28.8216	10.889
TraesCS1B02G382800	C4	1.66127	0.0531658	0.319462	2.21471	1.49506
TraesCS1B02G390500	C4	1.69814	3.35851	5.85231	6.71568	10.3625
TraesCS1B02G393000	C3	0.0129483	0.0407286	0.652645	1.93554	1.64469
TraesCS1B02G400400	C4	0.303831	0.917241	0.790007	1.1276	1.48564
TraesCS1B02G423000	C3	1.6017	2.72396	3.08256	4.84675	5.20853
TraesCS1B02G439300	C4	0.0437269	0	0.0852298	0.951854	1.11137
TraesCS1B02G480600	C4	16.0302	11.1687	22.4803	25.3172	29.1566
TraesCS1B02G481000	C3	0.164175	2.63433	3.66674	5.27104	3.84573
TraesCS1D02G008000	C4	0.368067	0.169209	0.183392	0.665644	1.25302
TraesCS1D02G009100	C3	0	1.41112	0.465446	11.7978	7.75344
TraesCS1D02G013600	C4	0	0.229139	0.0462584	2.67106	6.35151
TraesCS1D02G019600	C3	0.325996	1.41248	2.13272	2.58517	2.68869
TraesCS1D02G029100	C2	1.89344	5.57403	11.0452	10.2464	7.66724
TraesCS1D02G039600	C4	32.8143	18.9008	47.3445	64.7159	84.1197
TraesCS1D02G041500	C4	0	0	0.0271395	0.623719	1.36944
TraesCS1D02G051400	C4	0.206109	0.5127	0.514649	1.33148	2.00034
TraesCS1D02G051500	C4	0.429076	1.35901	1.15461	2.28967	3.40056
TraesCS1D02G059800	C2	0.377548	0.34506	1.1955	0.723483	0.753587
TraesCS1D02G077400	C3	11.8774	10.3114	19.553	28.8288	23.3446
TraesCS1D02G078100	C4	1.07303	0.337744	0.370828	0.988242	1.0899
TraesCS1D02G079800	C3	4.64207	3.92243	0.722114	56.08	14.831
TraesCS1D02G081500	C2	8.61294	5.80281	17.2795	10.3549	8.88323
TraesCS1D02G083800	C3	1.53921	2.3279	1.84187	9.25657	7.10115
TraesCS1D02G090600	C4	0.388036	0.65951	1.27483	1.48955	1.90276
TraesCS1D02G113200	C4	3.05276	0.955759	4.42088	9.07288	11.2016
TraesCS1D02G126200	C4	3.64521	2.42366	4.76499	6.83319	9.60241
TraesCS1D02G133600	C2	7.44057	14.044	24.3054	22.0589	15.7796
TraesCS1D02G143300	C3	0.891541	0.0696304	5.17947	18.9097	17.8682
TraesCS1D02G143800	C4	2.01428	0.883203	1.41754	1.77269	1.91756
TraesCS1D02G150700	C2	1.14642	0.561591	1.71898	1.69753	1.17839
TraesCS1D02G155400	C4	14.0018	3.04237	5.81003	15.3311	25.3942
TraesCS1D02G155900	C3	6.10329	4.1043	3.23861	7.85471	5.84312
TraesCS1D02G157400	C4	2.30339	0.659515	2.36353	3.27247	3.08309
TraesCS1D02G174100	C4	0.0227712	1.23734	0.504038	1.38617	3.21118
TraesCS1D02G174600	C4	1.44321	2.76662	4.44922	5.18907	7.61701
TraesCS1D02G219900	C4	1.75033	0.218345	0.652338	2.20084	1.9155
TraesCS1D02G225700	C2	2.12036	3.77634	14.5708	2.19458	1.57925
TraesCS1D02G240200	C4	2.02201	2.29507	3.59694	3.89221	5.47053
TraesCS1D02G241400	C4	0.454764	0.983916	6.82599	12.2297	13.1429
TraesCS1D02G249400	C3	0.325543	1.43558	2.29977	3.3207	2.54685
TraesCS1D02G271200	C3	0.0185273	1.10506	1.84248	8.31189	7.25282
TraesCS1D02G271800	C4	1.97076	0.555113	0.656203	1.57215	2.74076
TraesCS1D02G275100	C4	0.222092	0	2.93196	4.06824	5.02603
TraesCS1D02G276400	C3	0.347891	0.940251	0.929252	2.16878	0.465821
TraesCS1D02G279600	C4	3.82558	7.18036	18.7837	18.0406	24.4165
TraesCS1D02G280000	C4	1.15947	0.581258	2.53342	2.64241	2.91473
TraesCS1D02G282800	C3	0.713425	2.0446	1.80365	2.85489	2.50456
TraesCS1D02G283900	C3	0	0.0447353	0.0460468	5.27037	2.00846
TraesCS1D02G286200	C4	0.483002	0.126701	1.81357	2.3576	2.99041
TraesCS1D02G286600	C2	139.807	57.7392	148.945	125.083	118.724
TraesCS1D02G295700	C4	4.33075	2.05631	2.28131	6.02182	6.81685
TraesCS1D02G304700	C4	1.13002	0.101906	0.0767358	1.26447	1.22351
TraesCS1D02G318800	C3	0.627682	2.24575	1.90632	3.71095	2.25973
TraesCS1D02G320900	C2	1.70023	1.84692	8.6161	6.388	5.51418
TraesCS1D02G321300	C3	0.685526	1.57173	0.678884	6.90438	3.22816
TraesCS1D02G328900	C3	2.35091	0.0582794	2.78166	116.556	25.4846
TraesCS1D02G331500	C2	1.48904	1.24515	3.01295	2.9236	2.76433
TraesCS1D02G345500	C2	0.865585	9.41596	43.0061	24.7732	33.4042
TraesCS1D02G370000	C4	18.6558	14.3084	21.7142	33.0239	41.4331
TraesCS1D02G382200	C4	1.31396	0.906357	2.34233	4.45744	4.87661
TraesCS1D02G397300	C2	4.59561	7.75487	15.3513	14.081	12.0642
TraesCS1D02G404000	C2	21.3715	11.6233	20.8572	19.0526	20.7716
TraesCS1D02G408300	C4	1.2569	0.338302	1.16617	1.1303	1.70513
TraesCS1D02G415600	C3	0.127291	0.835279	1.05802	1.54233	1.41367
TraesCS1D02G434600	C3	0.947051	2.10431	4.19409	4.83719	5.45677
TraesCS1D02G443300	C4	0.0212512	0.0188424	0.238739	1.39566	2.23554
TraesCS1D02G445400	C4	0.49195	0.474918	0.747207	1.55638	1.60991
TraesCS1D02G448600	C4	5.03268	10.3331	11.502	19.2514	21.6305
TraesCS1D02G449000	C3	0.266696	0.649896	1.84225	2.29615	1.64628
TraesCS1D02G452700	C4	0.962053	0.458781	0.318312	0.938251	2.57176
TraesCS2A02G004900	C3	0.535391	0.158019	5.6675	11.7516	10.8175
TraesCS2A02G022100	C2	8.76627	11.3021	24.5507	20.4432	16.1229
TraesCS2A02G026600	C3	8.84773	59.4595	117.398	207.258	119.449
TraesCS2A02G058100	C4	80.5432	58.3389	74.7169	343.694	681.937
TraesCS2A02G076200	C3	0	0	0.604342	3.66192	1.37399
TraesCS2A02G076400	C3	0.20916	0.0392238	2.88246	16.0986	1.93736
TraesCS2A02G079900	C4	1.40458	0.951692	3.88486	4.59138	5.58343
TraesCS2A02G089100	C2	12.0461	3.486	16.4526	10.8078	10.2934
TraesCS2A02G100800	C4	7.02987	4.49613	1.21323	9.25151	11.6041
TraesCS2A02G101900	C3	0	0.721433	0.128935	1.97274	1.6231
TraesCS2A02G114200	C2	0.0918274	0.45522	1.51832	0.360144	0.42623
TraesCS2A02G114900	C3	4.74615	6.15727	10.1043	14.2168	14.64
TraesCS2A02G149500	C2	0.801596	0.784719	3.8725	2.89056	2.04079
TraesCS2A02G149900	C3	3.62554	0.0678604	2.62761	101.385	82.2041
TraesCS2A02G157100	C3	0.610887	4.13096	3.68027	6.85453	4.47448
TraesCS2A02G158700	C4	0	3.22716	1.79655	52.9002	56.0068
TraesCS2A02G158800	C3	0.0953861	5.2388	13.1278	527.585	333.253
TraesCS2A02G168000	C4	0.0307859	0.211092	1.54919	3.89944	9.48446
TraesCS2A02G169900	C3	0	0	2.84263	17.197	8.79655
TraesCS2A02G174600	C4	47.4693	56.7403	59.4568	288.28	276.266
TraesCS2A02G190100	C3	2.09534	2.14446	2.87555	7.83757	5.82459
TraesCS2A02G197800	C4	18.8591	12.6701	16.479	19.3968	17.8686
TraesCS2A02G199400	C4	4.83393	2.90337	4.45112	5.8703	7.23357
TraesCS2A02G199600	C4	17.1943	25.9312	52.0508	62.3216	70.5284
TraesCS2A02G204300	C4	14.2996	6.30031	13.8696	16.5109	15.8438
TraesCS2A02G205900	C4	84.7906	13.4224	24.2625	95.9862	97.666
TraesCS2A02G207700	C3	3.68728	6.26382	9.94618	16.0694	10.9442
TraesCS2A02G227600	C2	0.0499333	1.14177	1.85945	0.910926	0.409015
TraesCS2A02G243400	C3	6.73801	7.23684	3.56472	9.05032	5.83056
TraesCS2A02G262900	C3	0.802239	1.27938	1.46724	3.31063	3.39867
TraesCS2A02G270100	C4	17.6339	11.9861	12.6822	16.0041	29.1355
TraesCS2A02G273800	C3	0	0.0158425	0.163559	1.47731	0.597516
TraesCS2A02G280400	C3	0.982417	2.72883	2.44927	6.75723	5.03812
TraesCS2A02G291400	C3	4.85881	4.0862	10.1375	15.5391	14.7055
TraesCS2A02G318300	C4	2.21999	6.89663	1.85017	6.79746	8.73979
TraesCS2A02G318400	C4	0.480801	3.60962	4.63623	6.43567	8.09044
TraesCS2A02G319000	C4	6.20557	1.08774	4.12804	7.38733	9.51284
TraesCS2A02G324700	C4	6.75104	0.922241	2.69234	9.83252	8.44275
TraesCS2A02G331100	C4	1.41504	2.48015	0.700335	4.40724	5.40791
TraesCS2A02G338300	C3	0	0.0803601	0.821693	0.974359	1.09766
TraesCS2A02G344500	C2	8.67598	9.3594	20.5235	11.1205	9.03887
TraesCS2A02G351800	C4	0	0	0	1.45155	3.02185
TraesCS2A02G380300	C4	1.02111	3.68647	13.6005	20.8147	23.539
TraesCS2A02G383300	C4	0.248629	0.217792	4.7802	5.57598	7.31884
TraesCS2A02G397600	C2	11.3556	6.23819	13.7713	9.77459	9.61756
TraesCS2A02G399400	C3	0	0.661429	0.559625	1.78779	0.691794
TraesCS2A02G399700	C3	0.0240578	1.50677	2.59667	4.23969	4.90664
TraesCS2A02G423000	C4	0.756883	0.659251	0.277759	0.498202	1.18318
TraesCS2A02G443300	C4	102.918	16.9301	62.1555	137.264	140.759
TraesCS2A02G443400	C2	19.2497	7.13699	31.625	23.5379	17.6574
TraesCS2A02G453300	C3	0.515767	0.0909528	0.0975598	1.04831	0.125531
TraesCS2A02G454500	C4	0.574654	0.725069	0.200197	2.80428	11.2455
TraesCS2A02G462200	C3	0	0	0.36023	1.76745	0.578809
TraesCS2A02G466700	C4	2.89015	1.52191	2.81995	4.23579	4.78453
TraesCS2A02G472300	C2	0.199116	0.369431	1.8722	0.475944	0.545841
TraesCS2A02G474200	C3	0.0784343	0	0.0985705	3.50015	0.80875
TraesCS2A02G482100	C3	1.10666	2.71933	3.27538	6.16581	2.23211
TraesCS2A02G503200	C4	9.20367	5.1715	11.0299	15.4831	14.5227
TraesCS2A02G507800	C3	0.749781	2.32274	7.33451	35.5257	23.9314
TraesCS2A02G514600	C3	0.283634	0.640029	1.15167	1.26857	1.24378
TraesCS2A02G514900	C4	0	0	0.564302	1.41272	2.70363
TraesCS2A02G522200	C4	1.97228	3.32858	5.41552	4.99979	6.76465
TraesCS2A02G539600	C4	0.299493	0.21075	0.143804	5.17286	5.44225
TraesCS2A02G563400	C3	0.429699	0.744338	3.26634	3.45249	3.29706
TraesCS2A02G565800	C2	2.13025	2.06947	8.2252	7.49032	7.21196
TraesCS2A02G570100	C3	0.148086	0.724497	1.23789	1.44488	1.66414
TraesCS2A02G572500	C3	0.072855	0	0.23779	1.80349	0.95964
TraesCS2A02G572700	C3	0.0955921	0.0232891	9.99065	24.2815	9.04373
TraesCS2A02G572800	C3	44.19	0.15308	100.677	206.257	28.4239
TraesCS2A02G573300	C4	0	0.0966981	1.60008	75.6466	74.82
TraesCS2A02G573700	C4	1.40407	0.492461	37.2807	463.005	659.776
TraesCS2B02G023900	C3	6.08513	10.5805	15.923	20.0236	20.242
TraesCS2B02G030600	C2	3.94225	7.26404	15.9662	10.9013	15.1703
TraesCS2B02G030700	C3	18.0967	18.7529	44.1555	48.7351	40.5678
TraesCS2B02G047700	C3	0	0	2.34999	2.90473	1.7024
TraesCS2B02G051500	C3	0.609197	1.72656	3.49994	6.94498	5.61341
TraesCS2B02G055000	C4	0.0878428	0.0137022	0.663046	3.09935	3.49767
TraesCS2B02G069300	C4	0.0319675	0	0.118548	2.04943	2.44223
TraesCS2B02G074100	C2	3.50891	8.82588	14.2503	8.76989	7.92526
TraesCS2B02G083000	C4	4.81884	5.42788	7.50922	11.0117	15.2086
TraesCS2B02G088400	C3	0.115614	3.21992	2.82769	6.44271	4.51557
TraesCS2B02G094700	C4	2.24851	1.37429	5.22727	6.65571	6.85963
TraesCS2B02G111900	C4	5.74513	1.73235	2.7426	5.75138	5.13194
TraesCS2B02G125800	C3	0	0.0236947	0.176954	4.7802	1.49642
TraesCS2B02G171900	C4	0.671568	0.23148	0.474797	3.8702	6.34088
TraesCS2B02G174900	C4	1.03644	0	0.871665	26.5861	26.4137
TraesCS2B02G175000	C3	0.0865373	0	0.451337	7.32478	4.97057
TraesCS2B02G175100	C3	0.447456	0	0.0523146	6.76597	5.78001
TraesCS2B02G182000	C4	2.82589	0.375453	0.477873	2.8583	3.41252
TraesCS2B02G184400	C3	0.097554	17.2282	27.4742	430.51	272.58
TraesCS2B02G188700	C4	0.741053	1.03843	1.6002	4.70515	5.04131
TraesCS2B02G201000	C4	22.6472	9.89485	5.81332	34.9097	32.3711
TraesCS2B02G210300	C4	0.888638	1.85426	1.90833	3.59848	9.40865
TraesCS2B02G231800	C4	17.3858	6.8121	15.9116	17.2902	17.252
TraesCS2B02G234900	C4	2.12899	2.92845	4.97874	5.29701	6.75321
TraesCS2B02G235500	C4	0.142766	0.0465579	0.10109	0.661562	1.03026
TraesCS2B02G312600	C4	0.2249	0	0.0668967	3.88213	6.88768
TraesCS2B02G315000	C3	0.556051	5.46801	14.7857	32.4531	20.7134
TraesCS2B02G323600	C4	0.328875	0.350238	5.22009	11.4668	15.1423
TraesCS2B02G328800	C3	0.137526	0	0.501449	1.96063	0.970145
TraesCS2B02G329200	C3	0.0141191	0	1.49346	2.37641	1.27845
TraesCS2B02G329400	C3	4.16874	2.30978	4.61743	5.82715	4.73072
TraesCS2B02G337300	C2	3.51051	6.10655	15.8224	13.1423	11.0247
TraesCS2B02G342100	C2	8.59697	7.5666	17.5039	10.8522	8.50036
TraesCS2B02G365500	C3	0.622951	1.7847	2.12381	2.97587	2.96062
TraesCS2B02G370000	C4	0	0	0	1.76153	5.40627
TraesCS2B02G397300	C4	0.466948	1.3543	6.23297	10.8849	12.1624
TraesCS2B02G400500	C3	0.110848	0.592443	1.13228	1.28948	1.28098
TraesCS2B02G401700	C4	2.74079	2.74942	1.89008	2.55617	4.42842
TraesCS2B02G415000	C4	8.02007	1.36585	4.40222	7.25194	7.30103
TraesCS2B02G417700	C4	0.0873429	3.02643	3.66975	4.52997	6.12235
TraesCS2B02G418300	C3	3.10591	4.02248	9.76453	13.5537	12.2146
TraesCS2B02G438300	C3	0	0.214122	0.737993	1.18205	0.758509
TraesCS2B02G439700	C2	0.0495482	1.70523	5.39913	0.978172	1.90387
TraesCS2B02G448000	C4	3.35757	2.41154	4.72659	6.07737	7.80044
TraesCS2B02G462400	C3	0.467304	4.86315	12.5931	13.479	13.8783
TraesCS2B02G464400	C4	62.2839	23.7624	65.0196	138.039	152.547
TraesCS2B02G464500	C2	20.6347	6.55979	32.3494	21.5815	15.867
TraesCS2B02G470100	C3	0.565422	1.64606	2.0702	2.87172	2.12763
TraesCS2B02G476300	C4	4.06895	1.0989	4.77766	6.29188	11.7438
TraesCS2B02G480500	C3	0.158093	1.26875	3.80455	9.38207	0.723863
TraesCS2B02G488000	C3	0.00504252	0.166236	0.26922	1.20036	1.21187
TraesCS2B02G488400	C3	0.597875	1.20016	1.42278	2.13276	2.02011
TraesCS2B02G491200	C3	17.5968	25.5724	22.186	51.3772	50.6556
TraesCS2B02G497700	C3	0	0.108098	0.0384032	1.50397	0.50457
TraesCS2B02G499400	C4	4.71134	4.29999	8.3171	10.4736	11.4807
TraesCS2B02G503300	C3	0.757505	0.302878	0.881035	2.40629	1.84194
TraesCS2B02G503900	C4	0.144478	0.494788	0.51402	1.04345	1.48865
TraesCS2B02G516700	C3	2.43795	0.276263	0.16966	5.94896	4.36457
TraesCS2B02G534800	C4	25.7335	18.358	14.528	30.5331	24.9557
TraesCS2B02G543200	C4	0.257101	0.0286104	0.94215	2.51847	3.84927
TraesCS2B02G548400	C4	1.84757	1.48584	2.8433	5.78751	11.5438
TraesCS2B02G558000	C4	0.367724	0.0778317	0.53466	1.14116	1.58212
TraesCS2B02G562700	C3	0.85579	1.18284	1.94596	3.48253	3.06763
TraesCS2B02G570500	C4	7.74623	4.42302	4.49215	8.19229	9.10709
TraesCS2B02G581100	C3	0.281809	1.17729	1.03562	1.79842	2.02716
TraesCS2B02G591800	C3	0	0.0440095	0.130486	12.126	10.5284
TraesCS2B02G598600	C3	0	2.82995	3.21494	13.8989	5.21692
TraesCS2B02G610200	C4	1.09397	0.657752	0.757261	3.04489	5.21586
TraesCS2B02G613900	C4	0.435819	0.638151	0.0209957	8.85154	24.0431
TraesCS2B02G614100	C4	0.59564	0.510103	0.172634	2.02139	2.98351
TraesCS2B02G615100	C4	0.928537	0	0	1.39462	1.43768
TraesCS2D02G001800	C3	0.0319071	0.0425632	1.52647	6.16283	4.32521
TraesCS2D02G019600	C3	0.127338	6.50672	8.7772	24.9809	20.1361
TraesCS2D02G020200	C3	0	0	0	1.61132	1.29697
TraesCS2D02G022900	C2	14.4739	13.4825	37.096	33.5885	27.2019
TraesCS2D02G028200	C4	0.00914638	0	0.525262	3.97915	4.39207
TraesCS2D02G038400	C3	0.671272	1.73008	2.20306	3.2143	2.94071
TraesCS2D02G041600	C4	0.0932896	0.0928474	1.68846	7.52483	8.03124
TraesCS2D02G041800	C4	0	0	0.157768	2.32986	2.70823
TraesCS2D02G058400	C3	0	0.119784	0.20387	2.74906	1.93833
TraesCS2D02G058900	C3	1.07094	1.25106	1.96587	4.40906	3.5588
TraesCS2D02G066200	C3	0.217486	0.177975	0.509271	1.03041	0.946859
TraesCS2D02G067600	C3	0	0.305004	0.147469	2.04433	1.5565
TraesCS2D02G067700	C3	0.400759	0.866188	0.947995	2.41831	2.18929
TraesCS2D02G069000	C3	0.0129801	1.44192	1.69159	7.82181	4.21198
TraesCS2D02G074900	C3	0.0498553	0	0.186695	3.19823	2.15306
TraesCS2D02G077200	C4	2.42844	1.30493	4.90428	4.48388	5.45724
TraesCS2D02G093600	C3	0.0353485	0.905493	2.34736	4.04635	0.954418
TraesCS2D02G096600	C4	4.4415	7.50648	10.6646	13.2918	16.9924
TraesCS2D02G100300	C4	7.88296	7.52523	1.48946	11.9567	16.4
TraesCS2D02G108500	C3	0	0.0413121	0.170695	2.45561	0.71294
TraesCS2D02G111500	C3	0.200438	0.356403	0.508359	1.07296	1.06192
TraesCS2D02G114300	C2	5.3117	6.62801	18.4398	1.31428	0.308072
TraesCS2D02G145700	C3	1.63412	3.9747	4.42647	7.01076	4.99854
TraesCS2D02G151200	C4	0.588217	0.337042	1.19953	5.90481	10.019
TraesCS2D02G153600	C3	0	0	0.0450117	1.83729	0.178182
TraesCS2D02G154900	C3	1.28426	0.097085	2.64852	42.977	38.5946
TraesCS2D02G163000	C3	0.376477	5.49323	4.10569	8.41554	5.74607
TraesCS2D02G165800	C3	0.0885304	23.4496	23.3678	238.678	153.698
TraesCS2D02G177400	C3	0	0	5.2548	15.291	9.14854
TraesCS2D02G182000	C4	59.1925	75.0994	77.8246	269.213	263.389
TraesCS2D02G203200	C3	0.353891	1.13859	2.18665	3.39106	1.96541
TraesCS2D02G210900	C4	0.520494	1.08053	0.398542	0.890025	1.58944
TraesCS2D02G211600	C2	21.8085	12.1378	20.5646	21.8154	19.9505
TraesCS2D02G229000	C4	20.5364	11.5513	16.0028	23.2059	24.3726
TraesCS2D02G256100	C2	0.737661	0.685859	8.23315	2.09627	1.38301
TraesCS2D02G257900	C3	5.62433	3.79564	3.85029	7.41448	3.33848
TraesCS2D02G272800	C3	0.0953672	0.136099	4.45925	8.40799	7.4533
TraesCS2D02G279200	C3	1.44545	4.03466	3.06972	6.40322	5.96802
TraesCS2D02G289400	C4	15.9686	8.85493	15.9577	18.4864	17.9593
TraesCS2D02G291900	C4	0.0812243	0.124656	0.852936	0.244326	2.63272
TraesCS2D02G295400	C3	1.60585	3.62038	5.04887	7.24438	5.19716
TraesCS2D02G296600	C3	0.0930575	6.3719	11.7121	39.3153	14.7672
TraesCS2D02G304300	C3	0.360837	2.69469	1.51571	4.7597	3.81993
TraesCS2D02G305400	C4	0.145185	0.856762	4.41485	4.09819	5.34807
TraesCS2D02G308000	C4	0.692973	0.199691	0.963741	2.34177	3.465
TraesCS2D02G311000	C4	0.726141	0.363515	0.659753	0.973551	1.60213
TraesCS2D02G312200	C3	0.955563	0.296619	1.77398	3.72898	1.23967
TraesCS2D02G316800	C4	1.51915	0.956781	4.1659	4.00581	4.63985
TraesCS2D02G318400	C3	0.0132581	0.388297	0.447264	5.81908	1.782
TraesCS2D02G320600	C3	0	0.0641304	2.14054	6.44622	4.9841
TraesCS2D02G322800	C2	7.13597	6.03602	14.2163	8.00392	6.34851
TraesCS2D02G323200	C3	3.07666	6.62399	7.28203	9.15992	10.7708
TraesCS2D02G324000	C4	0.0569852	0	0.236966	1.23266	1.287
TraesCS2D02G324700	C3	0	0.04266	1.28561	7.25022	2.80575
TraesCS2D02G325000	C2	0.279549	0.94992	3.91037	3.99891	2.45488
TraesCS2D02G335600	C2	1.1739	1.9205	5.12719	3.03998	1.28636
TraesCS2D02G338200	C3	1.68229	2.28487	6.35037	13.2168	8.16857
TraesCS2D02G345400	C2	1.9831	2.96528	4.41201	2.10433	1.12351
TraesCS2D02G348400	C2	0.0738602	2.59349	5.74934	2.13934	0.511264
TraesCS2D02G350000	C4	0.106351	0.114726	0.264333	2.8866	5.81036
TraesCS2D02G352900	C4	1920.35	2485.22	2114.41	3684.46	5667.97
TraesCS2D02G376600	C3	1.63352	4.5328	14.3984	28.0131	26.7792
TraesCS2D02G379600	C2	0.198434	2.58148	6.27097	3.1271	4.76414
TraesCS2D02G386100	C4	6.54025	18.2593	22.751	25.567	34.4947
TraesCS2D02G399500	C4	0.430325	2.29322	0.269459	1.22472	2.65658
TraesCS2D02G406200	C3	0.616582	0.196571	1.42311	2.64629	1.62774
TraesCS2D02G440200	C3	0.108215	0.515444	1.0652	1.10831	0.872253
TraesCS2D02G440600	C4	0.195778	0.318955	1.00223	2.33786	2.47324
TraesCS2D02G442500	C4	116.089	22.9733	37.5863	106.768	118.356
TraesCS2D02G453600	C4	0.0592423	1.87392	1.74881	2.42244	4.14369
TraesCS2D02G453700	C4	1.4353	3.74878	2.97115	3.804	5.61536
TraesCS2D02G462600	C4	0.171666	0.0586931	0.0487472	0.782213	1.41788
TraesCS2D02G476900	C4	27.0146	3.4065	4.59492	34.6879	26.0721
TraesCS2D02G481900	C3	0.0290629	0	0.0613771	1.85831	0.675095
TraesCS2D02G488300	C4	19.4425	21.9312	37.3269	53.5792	87.7193
TraesCS2D02G489200	C3	1.6866	0.261868	0.0525783	5.31953	1.83764
TraesCS2D02G492800	C4	0	0	3.20071	19.28	34.5081
TraesCS2D02G508400	C3	0.579159	1.65921	0.992623	3.63736	3.35531
TraesCS2D02G540700	C4	1.60868	0.256483	0.274635	2.07986	1.93378
TraesCS2D02G541800	C4	36.3704	25.2621	22.3711	38.104	45.735
TraesCS2D02G544100	C4	11.2883	15.9429	29.1362	46.3176	81.9796
TraesCS2D02G551400	C2	0.908842	1.14243	1.84299	1.94403	0.898344
TraesCS2D02G551600	C3	0.214903	0.943325	1.23443	1.6667	1.56013
TraesCS2D02G555400	C4	0.258879	0.478158	0.474927	0.758652	1.09354
TraesCS2D02G555500	C3	0.247249	0.589113	0.536362	1.99135	1.77109
TraesCS2D02G562100	C3	0	0.0458292	0.469069	31.2478	15.3684
TraesCS2D02G562200	C3	0	0	0.629108	46.4611	19.862
TraesCS2D02G583000	C3	0	0.231307	2.52403	7.39767	5.61743
TraesCS2D02G583100	C3	8.73468	17.2587	12.7002	40.4315	38.9354
TraesCS3A02G028400	C4	12.3378	13.817	9.2174	12.5261	14.8093
TraesCS3A02G029500	C3	1.54256	5.20317	9.92031	15.3402	17.4262
TraesCS3A02G030100	C4	3.13001	2.12591	3.32615	3.2894	5.60048
TraesCS3A02G036000	C4	0	0.213435	0.285912	2.48835	2.83232
TraesCS3A02G041900	C4	1.6517	0.816978	2.47906	2.84809	2.9061
TraesCS3A02G045600	C4	0.152637	0	0.0715853	16.1628	17.1161
TraesCS3A02G050900	C3	0	0	0	1.65243	0.822989
TraesCS3A02G081800	C3	0.0357116	0.0902203	3.61928	6.7069	6.58104
TraesCS3A02G092700	C4	0.304274	0.110385	0.509474	1.26008	1.66656
TraesCS3A02G093900	C4	0	1.71233	0.18395	3.12615	4.00547
TraesCS3A02G098500	C4	0.688672	0.524659	2.34485	8.18604	11.6342
TraesCS3A02G102600	C4	0.427636	0.139572	0.0882079	1.32631	4.61338
TraesCS3A02G110200	C4	0.675156	1.78951	1.09346	2.1188	3.09082
TraesCS3A02G110900	C3	4.71993	16.7993	15.6821	26.4066	21.0742
TraesCS3A02G125500	C3	0.494922	4.0369	6.39859	12.5957	11.1652
TraesCS3A02G131300	C2	0.897307	1.39221	6.124	6.53684	4.36424
TraesCS3A02G144100	C4	0	0	0.766584	4.42968	7.28581
TraesCS3A02G144900	C4	0	0	0.547316	1.51672	2.47119
TraesCS3A02G158300	C3	0.702372	1.97288	1.8795	3.43291	3.51922
TraesCS3A02G163000	C3	0.69037	1.90732	1.44071	3.65921	3.19946
TraesCS3A02G174200	C3	0.931334	1.33761	4.90651	8.26917	4.96344
TraesCS3A02G175400	C2	16.058	6.9649	26.4275	29.2757	21.386
TraesCS3A02G187600	C3	0.102137	0.0438044	1.8652	7.5819	7.12904
TraesCS3A02G196200	C3	9.06911	18.9854	23.8866	34.2412	33.5724
TraesCS3A02G204800	C3	0.525323	2.82142	2.31525	4.48338	4.00134
TraesCS3A02G209400	C3	0.669375	1.17261	1.41452	4.7908	2.26761
TraesCS3A02G217200	C3	0.126284	0.468055	0.336602	2.28551	1.41963
TraesCS3A02G222900	C4	66.094	46.6206	34.1328	83.9147	103.54
TraesCS3A02G253800	C4	0.875456	0.732442	1.08797	1.85443	2.93319
TraesCS3A02G260200	C3	0	3.79974	4.08002	45.0007	15.593
TraesCS3A02G265800	C2	27.6524	11.3718	26.6338	18.0168	23.2054
TraesCS3A02G268800	C4	0.0513427	0.313003	0.153953	0.935908	1.7945
TraesCS3A02G276200	C4	1.61246	3.58369	1.95854	3.36303	4.60569
TraesCS3A02G277200	C2	15.9263	4.02876	52.6593	44.4502	49.6443
TraesCS3A02G285200	C2	0.592647	1.09762	9.23901	5.64631	2.02725
TraesCS3A02G285800	C4	0.691656	0	0.0621381	0.485336	1.20015
TraesCS3A02G307200	C3	9.83096	7.85817	21.8043	28.6636	29.2927
TraesCS3A02G324100	C3	1.01712	0.0113062	0.307563	3.05007	2.14534
TraesCS3A02G342300	C2	6.68979	1.35403	13.6549	9.43809	11.7952
TraesCS3A02G350400	C3	0	0.0951188	0.104758	4.78042	1.55149
TraesCS3A02G364600	C4	9.56308	5.25401	10.6911	10.1731	11.7063
TraesCS3A02G366500	C3	0.297273	0.0598232	0.270439	1.03841	0.307374
TraesCS3A02G376300	C3	1.1058	1.32311	2.53238	9.57465	5.42247
TraesCS3A02G377000	C3	0	0.134986	0.606505	2.4635	1.41399
TraesCS3A02G377800	C3	2.51009	4.16837	5.5653	7.26226	7.69836
TraesCS3A02G382900	C4	0.924133	0.641587	0.730984	1.8358	1.93642
TraesCS3A02G383600	C2	3.06217	3.03536	6.54701	4.83825	5.48101
TraesCS3A02G390300	C3	0.930073	2.11228	0.622836	3.26489	0.96832
TraesCS3A02G399700	C3	0.204614	0.835003	2.54672	4.04524	3.24409
TraesCS3A02G405600	C4	7.94522	5.73748	5.0725	5.99762	8.92676
TraesCS3A02G415900	C2	0.622506	1.15062	5.46604	3.56591	4.26851
TraesCS3A02G432900	C4	6.8054	2.53008	6.80485	6.81287	7.71676
TraesCS3A02G440700	C4	5.4252	7.54312	13.616	13.5319	16.7071
TraesCS3A02G445300	C3	0.0520288	1.49953	0.978543	2.26816	2.0987
TraesCS3A02G469400	C4	0.903555	1.60075	2.39811	2.84475	3.41404
TraesCS3A02G476100	C3	1.35463	2.80976	3.38533	5.25232	4.26566
TraesCS3A02G478700	C3	0	0.376186	0.961586	2.90029	2.22115
TraesCS3A02G490500	C4	0.234842	0.204422	0	0.0685989	1.19807
TraesCS3A02G506000	C2	13.4979	8.78085	14.0625	10.7179	10.8037
TraesCS3A02G512400	C3	0	0.349353	0.0370294	4.33768	1.26353
TraesCS3A02G512600	C4	13.5885	12.6824	24.217	33.7286	47.1021
TraesCS3A02G518200	C4	2.77705	5.45258	5.94871	6.89308	9.23208
TraesCS3A02G520300	C3	0.0345852	0.523878	1.45675	1.85472	1.1543
TraesCS3A02G527200	C4	1.97843	0.575741	2.45621	4.69869	4.23032
TraesCS3A02G534700	C3	0.316957	0.451647	0.95247	2.12469	0.752994
TraesCS3A02G536200	C4	0.00990151	0	0.0395901	1.97327	3.35501
TraesCS3A02G538500	C3	1.83278	5.43694	4.5253	6.97881	6.61263
TraesCS3B02G006000	C3	0.0714916	0.0319164	13.0579	16.1105	15.0458
TraesCS3B02G012800	C3	0.0539921	0.961144	0.195433	1.29872	0.364095
TraesCS3B02G025300	C4	0.073749	0	0.25579	5.17317	5.56812
TraesCS3B02G030600	C3	0.315063	0.72501	1.05539	1.4093	1.19646
TraesCS3B02G034300	C3	8.4383	0.232729	86.2885	226.269	158.88
TraesCS3B02G036700	C3	0.0538754	1.02899	32.3655	33.84	33.7213
TraesCS3B02G038300	C3	0.0966945	0	0.052074	31.3458	26.808
TraesCS3B02G038400	C4	4.00759	0.190834	0.220072	4.86692	4.83794
TraesCS3B02G038600	C4	5.89649	2.15146	3.64052	191.87	179.681
TraesCS3B02G041800	C2	2.89182	1.46599	6.00532	5.10986	4.20789
TraesCS3B02G044400	C4	9.26569	4.20998	5.94465	18.7289	48.3827
TraesCS3B02G048000	C4	0.276482	1.92514	0.437636	1.37293	2.53268
TraesCS3B02G069800	C3	1.36482	3.31583	3.61533	6.12417	5.50901
TraesCS3B02G096900	C4	0.0222531	0.00861937	1.42582	4.23152	5.3333
TraesCS3B02G107900	C4	0.384269	0.304804	0.304394	1.12312	1.54501
TraesCS3B02G141500	C3	0.417226	8.55783	9.63801	14.8575	13.5636
TraesCS3B02G142800	C3	4.45056	16.2098	17.3895	35.0723	26.6576
TraesCS3B02G145100	C4	3.42878	2.93528	2.40322	3.22811	3.73265
TraesCS3B02G145700	C3	1.27176	4.08654	6.94628	7.31964	6.61651
TraesCS3B02G146600	C2	11.1107	12.9543	16.6216	13.1858	8.44121
TraesCS3B02G163400	C3	0	0.0539514	0.0185943	1.29761	0.962086
TraesCS3B02G171700	C3	0	0	0.329251	1.23405	1.16265
TraesCS3B02G194100	C4	0.872113	0.551925	0.115033	2.12513	1.76057
TraesCS3B02G201800	C3	35.8215	33.2618	72.0928	81.0894	77.7432
TraesCS3B02G204100	C4	0.954444	0.464194	0.3877	1.39465	4.25379
TraesCS3B02G204600	C4	1.64734	1.94112	4.80254	5.60062	6.43521
TraesCS3B02G205100	C4	161.128	76.7616	525.245	1210.13	1779.6
TraesCS3B02G206200	C3	0.191462	0.472442	0.635446	1.8269	1.65924
TraesCS3B02G211400	C4	6.10033	1.47521	4.97532	6.423	6.22014
TraesCS3B02G217000	C4	0.102838	0	0.228501	2.66003	3.57824
TraesCS3B02G230400	C3	0.821767	1.67243	2.0961	3.96474	2.52833
TraesCS3B02G236900	C4	0.173847	0.258753	0.296349	1.2361	1.78231
TraesCS3B02G257200	C3	8.45063	8.12804	16.1926	25.9647	20.1279
TraesCS3B02G268600	C3	0.558514	0.173868	1.10036	2.59468	1.75934
TraesCS3B02G282800	C4	6.0758	5.71473	7.49844	12.7003	14.54
TraesCS3B02G293200	C3	0.0430673	0.330826	3.46907	12.668	9.59021
TraesCS3B02G297200	C2	2.3976	0.735823	7.07333	2.77877	2.02084
TraesCS3B02G310000	C4	2.54805	3.10435	1.42804	2.75722	3.14204
TraesCS3B02G319100	C2	0.330858	0.0901517	1.83363	0.726231	0.281156
TraesCS3B02G336800	C4	0.346768	0.208032	1.9123	9.00096	11.7433
TraesCS3B02G349300	C2	7.6604	3.34658	11.1267	9.58351	7.87724
TraesCS3B02G353600	C4	4.29331	0.412045	2.3824	3.61198	4.75184
TraesCS3B02G357400	C3	4.12435	1.85432	3.39001	5.78869	4.36523
TraesCS3B02G382900	C3	0	0.181784	0.027755	3.01809	1.0522
TraesCS3B02G383600	C4	0	0	0.492798	1.77486	3.23795
TraesCS3B02G384600	C4	1.32745	2.02757	3.12116	4.14238	5.24375
TraesCS3B02G389400	C3	0.646098	0.0622105	0.06831	2.89754	0.779081
TraesCS3B02G392100	C4	5.12396	1.9858	6.60504	6.91368	7.87438
TraesCS3B02G396400	C2	0.754251	1.85917	6.82666	1.74172	0.345403
TraesCS3B02G396700	C4	6.77346	2.2603	9.27152	12.7281	17.0829
TraesCS3B02G410600	C4	0.158886	0.783722	0.728488	0.845185	1.31828
TraesCS3B02G418800	C3	0	0.195936	0.0189961	7.08838	1.00149
TraesCS3B02G420400	C2	0.345537	0.285247	1.59877	0.593919	0.503978
TraesCS3B02G421700	C3	0.776671	1.3266	2.20267	4.10063	3.29654
TraesCS3B02G432700	C3	1.74337	1.72933	2.73852	5.08614	4.44555
TraesCS3B02G436300	C3	0.0755913	0.168356	0.0447693	1.69403	1.02351
TraesCS3B02G438400	C2	5.12124	6.08256	14.0427	16.1853	7.54584
TraesCS3B02G440500	C4	3.22911	2.69478	6.9431	11.9249	13.199
TraesCS3B02G445300	C4	0.863459	0.686656	2.40573	4.40798	6.21816
TraesCS3B02G449600	C3	0.0245918	0.0560677	1.32294	2.84079	2.11427
TraesCS3B02G449700	C4	0	0.230875	0.0938201	2.97402	3.07478
TraesCS3B02G464600	C3	0.160706	3.29094	8.62016	11.3909	9.05245
TraesCS3B02G468400	C3	0.376796	0.886253	3.12667	5.45271	5.37037
TraesCS3B02G474800	C4	2.35606	2.77879	4.1168	5.16276	7.21787
TraesCS3B02G480600	C4	0.435321	0.996629	1.53724	1.66233	2.28677
TraesCS3B02G484600	C3	0	0.0640137	0.853451	9.09255	3.04541
TraesCS3B02G488900	C4	0	0.0804765	0	1.09835	1.32506
TraesCS3B02G491000	C4	6.46408	5.56045	8.73933	16.4714	24.3077
TraesCS3B02G492700	C4	3.3407	8.01479	9.69231	12.9069	16.1342
TraesCS3B02G496600	C4	6.8048	3.33189	6.61792	7.25419	8.19754
TraesCS3B02G497300	C4	3.68738	7.178	8.02457	11.1375	16.8821
TraesCS3B02G503600	C3	0.604474	1.98586	3.258	4.25234	3.70054
TraesCS3B02G577000	C4	0.0155677	0.0386148	0.11726	3.57183	12.1561
TraesCS3B02G578100	C3	0.0494953	0.552283	4.55036	8.2871	6.19894
TraesCS3B02G579800	C4	2.95972	0.691382	0.845186	2.954	2.70809
TraesCS3B02G581200	C3	2.94005	7.48335	7.86085	13.701	12.6194
TraesCS3B02G583000	C3	1.17771	2.94616	3.99414	5.56911	4.92061
TraesCS3B02G593900	C3	0.125043	0.373231	0.407935	1.11433	0.909499
TraesCS3B02G603900	C4	13.7442	33.6964	33.7637	37.1936	67.2353
TraesCS3B02G608400	C4	0.0612327	0.0159361	1.11556	3.61529	4.70574
TraesCS3D02G017300	C2	3.94596	5.5239	12.9296	11.2587	13.9968
TraesCS3D02G021200	C4	120.022	68.4718	68.5208	109.223	118.686
TraesCS3D02G026200	C4	0.184614	0.0186458	0.733595	7.00442	6.73642
TraesCS3D02G031800	C3	4.37294	0.209205	15.9965	250.683	182.626
TraesCS3D02G033400	C4	0.436072	0.328501	15.5305	60.4443	60.266
TraesCS3D02G033800	C4	0.0490022	0.200121	0.538001	6.09789	7.64843
TraesCS3D02G035600	C3	0.0332742	0.0361832	0.0415508	6.71169	2.05441
TraesCS3D02G038400	C4	5.16167	1.75354	4.5016	6.58929	8.88786
TraesCS3D02G039500	C3	0.673756	1.33785	1.79197	2.40849	2.37094
TraesCS3D02G044000	C4	0.509523	0.758454	0.504901	1.15857	2.14004
TraesCS3D02G048200	C4	49.3169	84.1984	99.4474	111.938	190.288
TraesCS3D02G055000	C4	2.27037	2.06918	2.59647	3.44606	5.7538
TraesCS3D02G064000	C4	1.89773	2.11694	2.78207	5.10083	6.4944
TraesCS3D02G065200	C2	15.9718	12.1088	20.8933	12.034	10.8909
TraesCS3D02G081000	C3	0.484638	0.956799	1.5318	1.55909	1.59631
TraesCS3D02G082100	C4	0.245089	0.602486	4.54311	7.65208	8.43092
TraesCS3D02G094200	C3	0.0528326	6.63552	53.2592	278.032	126.812
TraesCS3D02G096500	C3	0.12353	0.21052	0.974989	3.52949	1.16624
TraesCS3D02G105700	C2	14.5568	16.4106	19.1043	11.2674	13.0608
TraesCS3D02G113000	C3	1.2808	1.87597	2.19582	5.8592	5.48994
TraesCS3D02G125400	C2	2.45819	1.47832	7.25027	4.64284	3.36727
TraesCS3D02G127100	C4	1.29069	0.375968	0.606745	1.73486	1.41526
TraesCS3D02G140100	C4	0.964798	0.240857	0.305283	1.13236	1.01884
TraesCS3D02G144700	C2	0.297578	0.524654	2.3085	1.68159	1.1638
TraesCS3D02G153700	C4	0.348245	0	0.314796	1.83686	3.20447
TraesCS3D02G169900	C3	3.46645	4.33704	2.67144	8.99048	6.38433
TraesCS3D02G177600	C3	43.6079	36.9881	90.1766	100.979	98.541
TraesCS3D02G179700	C4	2.39857	0.577501	0.971186	2.58296	4.82722
TraesCS3D02G180800	C3	45.8083	6.72135	106.759	127.801	119.758
TraesCS3D02G180900	C4	175.603	97.5337	356.934	641.819	749.44
TraesCS3D02G186200	C2	5.89574	3.54112	11.2676	10.1545	9.39905
TraesCS3D02G191300	C4	0.222425	0	0.248649	2.83124	3.34582
TraesCS3D02G193400	C4	1.08441	1.27921	1.66774	2.61264	3.8382
TraesCS3D02G219100	C3	0.18908	0.171919	0.246243	3.03354	1.47712
TraesCS3D02G239700	C4	3.19611	1.87025	2.42605	3.13244	3.95393
TraesCS3D02G260500	C3	0.222465	1.96756	1.98121	5.34557	2.50283
TraesCS3D02G270600	C4	0.391025	1.55813	0.427141	1.30377	2.00016
TraesCS3D02G274300	C4	0.262195	0.604355	0.563385	0.893055	1.37068
TraesCS3D02G279600	C3	0.334526	3.08954	3.84958	5.77273	5.34034
TraesCS3D02G285100	C2	0.518317	0.794283	13.0962	6.09427	3.09798
TraesCS3D02G290300	C3	1.26079	2.7091	4.6246	5.66165	5.77664
TraesCS3D02G298600	C3	4.43407	75.8878	116.151	193.375	78.6825
TraesCS3D02G330900	C4	0	0.0194454	0.0585842	0.673707	1.07677
TraesCS3D02G344400	C3	0	0.0985119	0.0408323	2.60441	1.09441
TraesCS3D02G345100	C4	0	0	0	0.418101	1.26623
TraesCS3D02G352300	C3	0.235514	0.797825	1.77579	2.19832	1.12124
TraesCS3D02G358000	C4	7.62055	4.04491	6.52372	6.9065	9.76596
TraesCS3D02G371000	C3	0.200217	1.35939	1.37658	2.28508	1.94527
TraesCS3D02G372000	C4	0.0867301	0.647514	1.30108	2.04653	3.14137
TraesCS3D02G377300	C4	2.41388	1.33481	0.607976	2.18541	2.63467
TraesCS3D02G378000	C3	0.92184	2.2717	3.03896	3.92163	3.99789
TraesCS3D02G379700	C3	0	0.0409732	0.0301685	2.96967	0.314252
TraesCS3D02G381200	C4	0.754738	0.117982	2.01331	3.73375	3.77141
TraesCS3D02G382800	C4	0.505853	0	0.0922836	1.42312	1.35782
TraesCS3D02G391100	C3	0.816041	0.0318028	4.58288	109.335	16.6744
TraesCS3D02G393700	C4	0.837527	0.533782	0.886546	1.54446	1.68677
TraesCS3D02G394300	C4	50.0862	55.6484	103.455	100.57	144.365
TraesCS3D02G402100	C2	0.173275	0.588377	1.15614	1.03398	1.02156
TraesCS3D02G406000	C4	2.69901	2.34039	4.84531	7.44907	8.96648
TraesCS3D02G409100	C4	0	0.155762	0.1708	0.53539	1.0734
TraesCS3D02G415100	C4	0.221582	0	3.03723	9.45374	13.419
TraesCS3D02G425800	C4	0.486603	2.51789	8.09072	10.0878	12.2394
TraesCS3D02G440300	C3	1.86219	3.99349	4.78142	6.10238	5.94775
TraesCS3D02G448700	C3	0.162165	0.0283126	0.230097	1.71432	1.56354
TraesCS3D02G449200	C3	0	7.91772	5.00066	10.6499	10.9346
TraesCS3D02G450200	C4	5.60089	11.8185	14.3343	18.5192	25.9717
TraesCS3D02G456200	C2	0.341743	2.1768	10.7821	7.12064	8.58459
TraesCS3D02G457400	C4	12.4852	8.56211	9.75139	13.0694	11.8847
TraesCS3D02G460500	C4	0.742554	1.45276	2.90033	3.28324	5.11044
TraesCS3D02G472400	C3	0.500049	0.943013	1.62318	2.13946	2.42151
TraesCS3D02G481100	C4	1.03401	2.97423	4.80532	4.71994	6.66317
TraesCS3D02G494600	C4	1.17799	0.768179	6.77719	9.03237	10.8847
TraesCS3D02G512600	C3	0	0	0.0553113	1.02427	0.77251
TraesCS3D02G519600	C3	0.0435074	0.0156444	0	3.51908	0.475893
TraesCS3D02G524000	C3	4.63491	2.94837	1.71021	7.52181	3.20035
TraesCS3D02G528500	C4	29.6741	19.5005	26.3663	34.6201	46.2106
TraesCS3D02G531700	C2	1.22005	1.06133	2.41789	2.5866	2.16689
TraesCS3D02G532700	C4	0.529229	1.78621	0.863828	1.91475	3.33919
TraesCS3D02G538100	C4	1.24341	0.222703	0	2.49383	4.94305
TraesCS3D02G542400	C3	2.72848	0.64071	7.65344	12.6979	9.32365
TraesCS4A02G000800	C3	0.861678	2.63582	2.61668	3.97453	3.03097
TraesCS4A02G015100	C3	0.046617	0.6453	32.3753	86.1025	29.5852
TraesCS4A02G015200	C3	0	0	7.75459	22.5511	6.37352
TraesCS4A02G029000	C4	7.96035	6.13237	11.039	13.6887	16.9995
TraesCS4A02G031600	C3	57.9033	100.393	177.294	194.364	218.594
TraesCS4A02G046300	C4	2.73585	1.26292	0.968276	3.76654	4.49494
TraesCS4A02G053700	C3	0.955928	2.06428	1.95983	3.39454	2.48641
TraesCS4A02G067300	C3	0.213326	0.390806	7.07021	11.1735	7.12237
TraesCS4A02G084200	C4	1.46639	0	0.0629426	0.629022	1.58679
TraesCS4A02G086800	C3	0.525785	2.12465	2.0604	3.16716	2.57408
TraesCS4A02G096100	C3	1.63888	4.7048	3.76274	7.10085	4.98151
TraesCS4A02G101000	C4	0.72816	0.947318	0.159017	0.738714	1.95315
TraesCS4A02G106100	C4	13.1633	3.44412	2.15851	11.211	15.3237
TraesCS4A02G118600	C2	0.224896	2.20438	5.47901	5.17228	4.41927
TraesCS4A02G119300	C4	0.830955	0.212072	0.181402	0.72485	1.18246
TraesCS4A02G138900	C3	3.30995	7.89019	10.3782	16.0554	11.0571
TraesCS4A02G139800	C4	3.4889	1.94997	2.833	3.7453	3.04378
TraesCS4A02G140500	C3	0	0.32237	1.40295	2.36495	2.42095
TraesCS4A02G146000	C3	0.796226	2.97603	3.4403	4.85035	4.47636
TraesCS4A02G158100	C4	9.03031	9.82268	13.3781	43.9738	76.0497
TraesCS4A02G182100	C3	10.3276	7.19975	13.0032	14.8373	13.8368
TraesCS4A02G186800	C3	3.8596	1.7915	1.9038	5.42636	2.68479
TraesCS4A02G219100	C3	4.63138	12.0953	15.4653	19.0832	17.9
TraesCS4A02G229300	C2	1.6117	0.746078	3.72751	2.03753	2.42251
TraesCS4A02G233800	C2	0.143525	1.85966	3.11083	1.32128	0.835247
TraesCS4A02G236200	C4	0.481056	6.29299	6.61372	7.72319	14.4192
TraesCS4A02G237700	C4	2.21951	11.0163	5.19948	13.6822	26.1262
TraesCS4A02G247500	C4	26.5055	27.7771	14.3103	31.1075	29.9128
TraesCS4A02G249200	C3	0.606029	2.33471	2.80766	15.0233	7.67343
TraesCS4A02G250200	C2	0.334684	2.56994	10.7945	3.49164	2.86713
TraesCS4A02G260000	C3	0.37457	3.10116	12.2576	18.4602	20.2192
TraesCS4A02G264200	C3	3.11503	5.24867	10.5025	11.9953	8.88486
TraesCS4A02G269400	C4	1.29014	15.0476	38.176	80.2385	100.131
TraesCS4A02G291300	C2	0.191634	1.43371	2.79839	1.27955	0.962387
TraesCS4A02G291500	C3	0.685187	3.63144	6.03586	8.04639	8.80702
TraesCS4A02G292400	C2	0.236652	0	1.07854	0.514315	0.438054
TraesCS4A02G293700	C3	0.428531	2.86987	1.52481	3.91166	3.03387
TraesCS4A02G335300	C3	5.75271	6.34205	12.7947	16.7929	12.5627
TraesCS4A02G345800	C4	11.0726	4.98743	10.8476	16.4963	23.0672
TraesCS4A02G346500	C3	1.83271	3.8757	7.44878	8.73666	9.89139
TraesCS4A02G351900	C4	2.58079	1.68444	1.84222	2.89352	2.91778
TraesCS4A02G353000	C2	2.5399	2.13815	4.22325	1.23563	0.335219
TraesCS4A02G357600	C4	7.11722	5.49262	10.5313	11.0091	15.222
TraesCS4A02G357900	C4	5.13179	9.24908	13.708	12.7498	16.0915
TraesCS4A02G358000	C3	1.58275	3.709	5.3417	6.74526	7.86358
TraesCS4A02G359200	C4	0.156835	1.28412	3.79135	5.71099	7.07624
TraesCS4A02G363200	C2	3.87341	1.50843	4.38632	2.86327	3.75375
TraesCS4A02G364700	C4	56.7333	33.9895	37.0821	47.8725	66.5458
TraesCS4A02G369300	C4	11.4942	1.71575	4.01449	58.9752	53.8157
TraesCS4A02G370900	C3	0	0	0.0788662	2.13537	1.55098
TraesCS4A02G391000	C3	0.567514	1.76327	2.33403	2.73535	2.55642
TraesCS4A02G396000	C4	1.43169	2.61597	3.95037	4.54161	5.39794
TraesCS4A02G396100	C3	0.875815	1.89778	3.08887	4.18766	4.4273
TraesCS4A02G396900	C4	0	0.174065	0.784968	0.714388	1.19184
TraesCS4A02G407000	C4	176.577	51.8632	108.105	252.917	581.384
TraesCS4A02G408100	C4	0	0	0.874731	2.45916	2.74895
TraesCS4A02G484600	C2	0.176032	3.75513	10.0861	0.311595	0.196353
TraesCS4A02G499928	C4	0.129732	0.532928	0.197615	0.583921	1.20426
TraesCS4B02G015100	C3	8.7625	25.9022	31.5524	47.5618	41.4997
TraesCS4B02G021700	C2	0.768214	0.806588	6.21147	3.78717	3.911
TraesCS4B02G022900	C2	0.953861	2.79464	5.4575	2.71389	2.02146
TraesCS4B02G029100	C4	0.869141	1.63794	2.21213	2.42018	3.03885
TraesCS4B02G032800	C4	11.1106	9.05612	10.3869	17.685	24.336
TraesCS4B02G033600	C3	0.0357481	20.9844	2.77786	47.8679	36.1555
TraesCS4B02G035100	C3	0.0364533	0.277891	0.869993	1.83847	0.821365
TraesCS4B02G041500	C2	0.523078	1.01076	9.13992	9.58059	4.30598
TraesCS4B02G046700	C2	31.7014	22.9115	60.3241	48.5965	54.9028
TraesCS4B02G064200	C2	8.47119	27.7385	42.3485	2.96054	0.799049
TraesCS4B02G065500	C3	0.169669	1.46859	2.53993	11.1591	2.84439
TraesCS4B02G078800	C4	0.422975	7.24597	10.5489	13.06	26.498
TraesCS4B02G082300	C4	0.10554	0.226185	0.186402	0.850743	3.29255
TraesCS4B02G087100	C3	0.983106	0.606406	2.17637	2.49972	2.02086
TraesCS4B02G092200	C4	4.51768	0.763544	4.07431	12.1374	13.9441
TraesCS4B02G113100	C3	0.068875	0.432199	0.642014	1.22366	0.843287
TraesCS4B02G117400	C2	9.07932	22.3766	34.9269	5.66333	3.64693
TraesCS4B02G124100	C3	2.81108	8.53829	9.6675	13.2557	10.472
TraesCS4B02G142500	C4	1.70472	8.81573	3.51489	8.09632	13.7985
TraesCS4B02G155000	C4	2.05631	4.90235	8.75203	23.9143	46.6703
TraesCS4B02G165700	C4	24.3064	14.8638	26.9365	33.6398	46.2188
TraesCS4B02G169800	C4	0.530449	0.0719269	0.243592	0.78741	1.09209
TraesCS4B02G178300	C4	0.543217	0.300641	1.57751	2.35937	2.43973
TraesCS4B02G190800	C2	0.842528	3.53555	7.86409	7.25197	6.67685
TraesCS4B02G198000	C4	4.68697	3.94593	2.76989	9.55974	11.2174
TraesCS4B02G200900	C4	5.46291	7.15188	10.4224	17.1787	21.0878
TraesCS4B02G202700	C4	2.78885	2.1215	5.18334	5.71268	6.01986
TraesCS4B02G208500	C4	0.186879	1.83883	1.54632	5.04874	9.41797
TraesCS4B02G211500	C2	3.40485	7.98874	12.4911	0.985528	0.0979373
TraesCS4B02G219600	C4	6.41615	2.77709	5.73814	5.43888	7.15781
TraesCS4B02G245800	C3	0.236937	0	0.21175	1.12179	0.540956
TraesCS4B02G249800	C3	0.397791	0.207823	2.71096	5.11747	4.82301
TraesCS4B02G256300	C3	0.11625	1.17382	1.90152	2.53832	1.8731
TraesCS4B02G259000	C3	0.467919	1.14583	1.30016	2.46044	1.52097
TraesCS4B02G260800	C3	0.494115	2.80768	3.62665	4.99004	3.57534
TraesCS4B02G276800	C4	7.05184	3.8501	7.61326	9.41381	12.1179
TraesCS4B02G285700	C3	0.136709	0.573942	0.815239	1.17886	0.61218
TraesCS4B02G290500	C4	8.35455	4.4245	3.21785	12.546	26.2085
TraesCS4B02G299300	C4	0.881166	0.712559	0.185027	1.5495	2.11556
TraesCS4B02G300200	C2	1.10443	0.553031	3.53657	0.676236	1.50126
TraesCS4B02G308400	C4	0	0	2.47147	3.90578	4.31531
TraesCS4B02G308500	C3	0.0385229	0.0769713	9.01253	15.9047	15.207
TraesCS4B02G312200	C3	0	4.50059	23.0606	58.3121	46.1146
TraesCS4B02G321300	C3	0.513478	1.17233	2.8796	3.85924	2.66704
TraesCS4B02G321400	C4	0.670722	0.0573763	1.02125	1.48461	1.43721
TraesCS4B02G322700	C4	0.537341	0.604943	0.544445	1.14881	1.56506
TraesCS4B02G337700	C2	0.621786	1.57528	2.7931	1.84287	1.77497
TraesCS4B02G364700	C3	2.03934	8.66828	14.571	25.326	18.7892
TraesCS4B02G369000	C4	0	3.4555	1.17263	6.08359	16.8522
TraesCS4B02G372400	C4	0.123974	0	0.123107	3.0319	3.11609
TraesCS4B02G374300	C3	1.30865	6.09231	7.88003	16.5039	11.1007
TraesCS4B02G391800	C2	0.249553	4.01113	17.2816	3.64732	5.44826
TraesCS4D02G019400	C4	0.727947	0.114512	2.42647	2.85622	4.13589
TraesCS4D02G020300	C3	1.67514	7.09689	9.94221	12.8039	13.0001
TraesCS4D02G028900	C2	2.93215	2.6049	6.51971	4.93189	4.43831
TraesCS4D02G030500	C4	2.06585	2.56425	4.34554	6.02747	6.54222
TraesCS4D02G033000	C4	0.289179	0.776064	2.54937	4.51351	6.18575
TraesCS4D02G042200	C3	1.37099	12.1482	20.5512	82.0748	51.0503
TraesCS4D02G048400	C4	0.431353	0.61168	0.468617	1.60688	2.76721
TraesCS4D02G063400	C2	6.37787	87.3908	132.601	46.6301	15.8646
TraesCS4D02G075800	C4	0.528891	6.82161	2.05237	5.18665	10.8089
TraesCS4D02G077600	C4	2.58219	15.0639	11.671	15.492	30.2277
TraesCS4D02G088900	C3	7.16546	4.52035	6.43502	8.42801	6.61748
TraesCS4D02G089100	C4	5.28958	1.3024	5.18849	15.9338	14.2926
TraesCS4D02G092500	C4	1.69093	3.15208	3.82463	5.61644	6.95887
TraesCS4D02G097000	C4	4.14921	5.6248	7.38565	10.5158	14.9594
TraesCS4D02G097100	C4	0.609508	1.90291	2.45887	2.44355	3.78364
TraesCS4D02G098700	C2	0.584164	1.33047	2.78499	2.27819	2.41631
TraesCS4D02G103200	C4	3.50587	0.661815	1.22585	2.28571	3.8694
TraesCS4D02G111600	C4	0.182792	0.0558518	0.0952165	1.62022	2.36531
TraesCS4D02G121000	C3	0.107578	0.120073	3.55039	3.8623	3.41919
TraesCS4D02G144900	C3	0.339301	4.33184	5.46116	12.7864	6.98469
TraesCS4D02G148300	C3	0.411154	1.29782	0.999996	4.03021	3.19697
TraesCS4D02G169100	C4	5.46363	5.69751	7.40891	23.7499	51.1562
TraesCS4D02G176800	C4	53.6635	43.8377	39.6817	57.2748	68.4422
TraesCS4D02G185800	C3	0.446152	1.66749	3.28744	4.30552	2.79815
TraesCS4D02G198800	C4	15.0661	21.6296	8.12575	29.0517	33.6257
TraesCS4D02G201900	C3	4.6341	7.80564	11.4763	13.1739	14.3364
TraesCS4D02G203600	C4	4.62271	2.18542	6.26267	7.99744	8.72744
TraesCS4D02G235800	C2	1.16794	1.66578	8.77609	5.85367	7.74612
TraesCS4D02G238600	C3	110.18	247.581	222.424	637.594	443.832
TraesCS4D02G238800	C3	3.67899	2.51405	0.64445	13.1929	9.93581
TraesCS4D02G246800	C2	56.8425	39.8442	85.941	71.8145	62.9594
TraesCS4D02G251600	C3	0.840348	1.90686	1.84386	3.31232	3.03714
TraesCS4D02G275400	C4	6.02974	5.02156	8.08439	9.95119	12.8183
TraesCS4D02G287700	C3	0.0782604	0.1343	27.738	42.0588	16.0929
TraesCS4D02G292400	C4	0.714328	0.409844	0.633791	1.26274	1.47452
TraesCS4D02G299100	C2	4.23112	0.755149	4.92033	1.00501	2.22512
TraesCS4D02G302200	C4	0.0210516	0.460629	0.0523231	0.183997	1.14116
TraesCS4D02G307000	C4	0.136279	0.0165798	3.70349	3.29219	4.26332
TraesCS4D02G314300	C4	16.0341	10.7724	11.2826	18.9105	24.1526
TraesCS4D02G314400	C3	1.99822	0.811775	3.25583	5.3173	3.71367
TraesCS4D02G317900	C3	0.217108	0.727267	0.833588	1.81632	1.35966
TraesCS4D02G318000	C2	3.34276	0.37657	3.60592	3.57938	3.07729
TraesCS4D02G326000	C3	2.18977	0.898323	2.89111	3.87046	2.28942
TraesCS4D02G341400	C4	0.0128759	0.179375	0.129074	3.17678	3.80989
TraesCS4D02G356800	C4	1.22165	0.175248	0.933547	1.07407	1.25421
TraesCS4D02G360400	C3	0.465808	1.50735	1.30671	2.12271	1.76851
TraesCS4D02G363100	C3	1.85825	2.19278	1.71651	5.29797	3.24876
TraesCS4D02G363400	C2	9.1284	5.69224	14.0445	10.0152	9.2683
TraesCS5A02G005000	C3	0.425563	0.645655	0.838672	1.91767	1.90997
TraesCS5A02G017500	C3	0.480709	0.429983	1.79075	6.05838	3.48329
TraesCS5A02G043400	C4	4.40667	5.88344	22.3962	18.9177	28.1848
TraesCS5A02G045400	C3	0.241728	0.686823	0.787316	1.14909	0.83059
TraesCS5A02G047000	C4	1.53119	0.255587	1.355	5.99664	6.32934
TraesCS5A02G051200	C3	0.515729	0.936251	1.44029	1.79557	2.04892
TraesCS5A02G053900	C3	1.706	2.6983	4.45868	5.47215	5.41926
TraesCS5A02G068400	C2	0	0.771654	17.9242	15.16	8.96122
TraesCS5A02G073800	C4	56.8025	39.74	35.2731	56.5781	63.1883
TraesCS5A02G093300	C2	16.5831	12.8642	38.8396	35.6124	32.7977
TraesCS5A02G111600	C4	25.2366	13.1374	17.7108	25.1761	34.2175
TraesCS5A02G115500	C3	0.307406	1.53211	2.13058	3.48324	2.31143
TraesCS5A02G124900	C4	0.0995852	0.686738	1.29561	1.63531	2.96454
TraesCS5A02G142700	C3	0	0.442866	0.239736	8.65506	1.49906
TraesCS5A02G149700	C2	16.8719	8.26438	19.2682	8.07419	4.97188
TraesCS5A02G153900	C3	7.92231	4.70502	12.8906	29.3757	17.5448
TraesCS5A02G154300	C3	0.5194	0.996074	1.39834	3.60785	2.93366
TraesCS5A02G169800	C4	1.34853	1.83179	2.47244	3.30618	4.29686
TraesCS5A02G179500	C3	1.34716	4.32423	5.3046	7.06187	4.50037
TraesCS5A02G200100	C4	0.939879	2.01258	3.95922	10.9808	12.4596
TraesCS5A02G207700	C3	0.189678	0	0	1.25793	0.297136
TraesCS5A02G217000	C3	0	0.0197479	0	2.91366	1.52628
TraesCS5A02G218000	C3	0.94507	1.25052	2.61369	2.79272	2.84055
TraesCS5A02G234700	C2	0.0473424	0.119712	2.18454	1.99532	0.83306
TraesCS5A02G234800	C2	0.200745	0.0306024	4.91137	4.99238	3.45383
TraesCS5A02G254300	C4	0.527348	2.02716	1.82677	2.38617	3.27067
TraesCS5A02G265000	C2	0.723871	0.425791	2.09184	1.40011	1.53252
TraesCS5A02G279600	C4	14.2398	9.30324	12.2467	13.1153	14.6235
TraesCS5A02G281500	C3	1.34036	2.90615	5.22384	6.25035	7.10685
TraesCS5A02G281800	C4	0.0894245	1.29872	1.12209	7.61698	14.9544
TraesCS5A02G283800	C2	0	1.55241	3.00659	0.929073	0.496573
TraesCS5A02G305600	C3	0.0404305	1.3675	0.946663	2.64095	1.27083
TraesCS5A02G309600	C4	0	0.0147131	0.224938	4.90212	5.62514
TraesCS5A02G317900	C3	0.539196	3.21333	5.00866	7.61398	6.68531
TraesCS5A02G335700	C4	2.39279	3.96987	5.61566	6.93659	10.4864
TraesCS5A02G360600	C4	0.103292	0	0	0.644421	1.58753
TraesCS5A02G363800	C4	8.47151	4.46006	11.9362	14.3801	20.2932
TraesCS5A02G365800	C3	0	0.0217647	0.11027	5.41728	2.00984
TraesCS5A02G369900	C2	21.4091	65.0644	99.5648	21.2752	7.24114
TraesCS5A02G389100	C3	0.0109406	0.421405	18.0995	59.5226	33.3488
TraesCS5A02G396300	C3	0.853469	1.76352	1.8571	2.71909	2.78666
TraesCS5A02G400300	C4	0	0.690634	0	0.228776	1.27015
TraesCS5A02G406100	C4	2.1105	1.23633	0.375767	5.33857	4.93339
TraesCS5A02G414300	C3	2.72265	1.83809	3.35934	4.66551	3.97064
TraesCS5A02G421700	C4	4.02848	2.03528	3.83846	6.7588	5.97533
TraesCS5A02G440500	C4	1.25218	2.45655	4.29967	3.80152	4.77124
[truncated: 926 more rows]
