# Supplementary material for: Uncovering transcriptional regulatory network during regeneration for boosting wheat transformation
Source: Research Square preprint supplement (doi:10.21203/rs.3.rs-2192210/v1), 2022-10-28
Supplement: Supplementary file 6 [file af77ffb7ad85e6937388c522.xlsx]

## Sheet: Table S11
Table S11. Protection score of differential footprints.
MotifID	tairID	tairName	Family	Description	Num	Protection_Score_DAI0	Protection_Score_DAI3	Protection_Score_DAI6	Protection_Score_DAI9	TC_DAI0	TC_DAI3	TC_DAI6	TC_DAI9
MP00142	AT1G14580	AT1G14580	C2H2	C2H2-like zinc finger protein;(source:Araport11)	4159	0.566546	0.742406	0.866169	0.895832	0.471062	0.573623	0.604642	0.613353
MP00032	AT1G28300	LEC2	B3	Transcription factor that contains a B3 domain, a DNA-binding motif unique to plants and characteristic of several transcription factors. Plays critical roles both early and late during embryo development. LEC2 RNA accumulates primarily during seed development. LEC2 is required for the maintenance of suspensor morphology, specification of cotyledon identity, progression through the maturation pha…	48389	0.93307	0.743571	0.614397	0.607966	0.680619	0.537185	0.466243	0.461661
MP00166	AT1G29160	DOF1.5	Dof	Encodes a DOF transcription factor involved in seed coat development. Regulates PRX2 and PRX25, involved in seed longevity.	11640	0.590616	0.790292	0.934857	0.96424	0.436878	0.555862	0.608099	0.620569
MP00171	AT1G30650	WRKY14	WRKY	member of WRKY Transcription Factor; Group II-e	1006	0.596966	0.612074	0.69814	0.699244	0.549808	0.544283	0.568979	0.636272
MP00174	AT1G32240	KAN2	G2-like	Encodes a member of the KANADI family of putative transcription factors. Together with KAN1, this gene appears to be involved in the development of the carpel and the outer integument of the ovule.Along with KAN1 and KAN4 appears to regulate the proper localization of PIN1 in early embryogenesis.	4403	0.481277	0.568833	0.822112	0.831303	0.398077	0.457855	0.610213	0.620311
MP00184	AT1G43700	VIP1	bZIP	Encodes a VirE2-interacting protein. VIP1 mediates nuclear translocation of VirE2 via its amino half, and interacts with histone H2A via it carboxyl half. Involved in osmosensory response. The mRNA is cell-to-cell mobile.	5983	0.735161	0.690782	0.655875	0.650163	0.611996	0.57721	0.554511	0.546505
MP00192	AT1G49480	REM19	B3	Encodes a nuclear-localized DNA-binding protein that interacts with ITN1 at the PM and nuclei in vivo and may regulate ITN's subcellular localization.	47579	0.621603	0.836595	1.04172	1.09582	0.460786	0.581427	0.658307	0.677904
MP00199	AT1G51700	DOF1.7	Dof	Encodes dof zinc finger protein (adof1). The mRNA is cell-to-cell mobile.	13875	0.619332	0.829903	0.979857	1.01511	0.443374	0.563695	0.617479	0.631553
MP00210	AT1G64620	DOF1.8	Dof	Plant-specific Dof transcription factor which regulates vascular cell di#erentiation and lignin biosynthesis.	11148	0.562664	0.762045	0.913268	0.945626	0.423567	0.542831	0.595934	0.610241
MP00223	AT1G69570	CDF5	Dof	CDF5 is a circadian regulated transcript that is antiphasic with respect to its natural antisense transcript (NAT) FLORE (AT1G69572).CDF5 transcript accumulation delays flowering. CDF5 links circadian oscillation and photoperiodism.	14187	0.583573	0.791675	0.946176	0.983904	0.431989	0.556943	0.623087	0.635701
MP00225	AT1G69780	ATHB-13	HD-ZIP	Encodes a homeodomain leucine zipper class I (HD-Zip I) protein which is expressed during the seed-to-seedling transition, regulates some of the network nodes, and affects late seedling establishment. Knock-out mutants for athb13 showed increased primary root length as compared with wild type (Col-0) seedlings, suggesting that this transcription factor is a negative regulator of early root growth…	635	0.456138	0.544255	0.967223	1.01619	0.368033	0.415696	0.684269	0.714188
MP00226	AT1G70920	ATHB-X	HD-ZIP	homeobox-leucine zipper protein 18;(source:Araport11)	2957	0.508824	0.586273	0.748064	0.800156	0.447982	0.472816	0.607182	0.643287
MP00231	AT1G72740	AT1G72740	MYB_related	Single Myb Histone (SMH) gene family member. Contains terminal acidic SANT domain.	5889	0.513013	0.656435	0.648081	0.675377	0.551878	0.702059	0.707626	0.72563
MP00238	AT1G75240	ZHD5	ZF-HD	Encodes a zinc finger-homeodomain transcription factor ZHD5. Nuclear import and DNA binding of the ZHD5 transcription factor is modulated by a competitive peptide inhibitor MIF1 (AT1G74660).	5521	0.393834	0.368918	0.617951	0.694992	0.412546	0.382087	0.588569	0.657232
MP00243	AT1G76880	AT1G76880	Trihelix	DF1 is a putative transcription factor required for the synthesis of seed mucilage polysaccharides. The df1 seeds produce almost 50% less mucilage than wild-type, but show less severe defects than the myb5 and ttg2 mutants.	3760	0.368434	0.43406	0.66906	0.720309	0.38955	0.434906	0.621204	0.658811
MP00244	AT1G76890	GT-2	Trihelix	encodes a plant trihelix DNA-binding protein	3659	0.314532	0.355987	0.538113	0.569214	0.394916	0.430704	0.600297	0.639163
MP00105	AT1G77080	MAF1	MIKC_MADS	MADS domain protein - flowering regulator that is closely related to FLC. Deletion of this locus in Nd ecotype is correlated with earlier flowering in short days suggesting function as a negative regulator of flowering.	7400	0.509571	0.653189	0.823341	0.842381	0.414409	0.50728	0.585497	0.592641
MP00268	AT2G18350	ZHD6	ZF-HD	homeobox protein 24;(source:Araport11)	7308	0.451725	0.45192	0.912683	1.04946	0.385561	0.377798	0.671744	0.771766
MP00269	AT2G20110	AT2G20110	CPP	Tesmin/TSO1-like CXC domain-containing protein which is a transcriptional repressor of genes required for maintenance of DNA methylation, including MET1, CMT3, DDM1, KYP and VIMs. Functions redundantly with its paralogue TCX5 in repressing the expression of these genes.	3731	0.322155	0.405408	0.605415	0.630646	0.334204	0.406098	0.544935	0.553988
MP00275	AT2G23320	WRKY15	WRKY	Encodes WRKY DNA-binding protein 15 (WRKY15).	43	0.808061	1.0395	0.838738	0.976229	0.761442	0.759429	0.756756	0.878431
MP00281	AT2G28810	DOF2.2	Dof	Dof-type zinc finger DNA-binding family protein;(source:Araport11)	9195	0.566589	0.746715	0.859287	0.891423	0.420923	0.535911	0.580009	0.593412
MP00282	AT2G30250	WRKY25	WRKY	member of WRKY Transcription Factor; Group I. Located in nucleus. Involved in response to various abiotic stresses - especially salt stress.	359	0.785443	0.609803	0.617017	0.669824	0.577208	0.534128	0.520554	0.561185
MP00290	AT2G33810	SPL3	SBP	Encodes a member of the SPL (squamosa-promoter binding protein-like)gene family, a novel gene family encoding DNA binding proteins and putative transcription factors. Contains the SBP-box, which encodes the SBP-domain, required and sufficient for interaction with DNA. It binds DNA, may directly regulate AP1, and is involved in regulation of flowering and vegetative phase change. Its temporal expr…	7325	0.667914	0.560411	0.516107	0.607324	0.661729	0.554834	0.546095	0.570629
MP00291	AT2G35530	BZIP16	bZIP	Encodes a G group bZIP transcription factor family member that can bind cis elements with an ACGT core, such as G-box, Hex, C-box and As-1. The protein is localized in the nucleus and can homodimerize and can heterodimerize with other G group members.	2357	0.769591	0.677972	0.574007	0.560309	0.762931	0.749371	0.659842	0.640246
MP00049	AT2G36610	ATHB-22	HD-ZIP	Encodes a homeodomain leucine zipper class I (HD-Zip I) protein.	6512	0.448516	0.53708	0.96725	1.0023	0.359958	0.412347	0.654971	0.682441
MP00295	AT2G37590	DOF2.4	Dof	PEAR protein involved in the formation of a short-range concentration gradient that peaks at protophloem sieve elements, and activates gene expression that promotes radial growth. Locally promotes transcription of inhibitory HD-ZIP III genes, and thereby establishes a negative-feedback loop that forms a robust boundary that demarks the zone of cell division.	9920	0.502702	0.686122	0.804382	0.831864	0.409051	0.528188	0.572901	0.58527
MP00299	AT2G38470	WRKY33	WRKY	Member of the plant WRKY transcription factor family. Regulates the antagonistic relationship between defense pathways mediating responses to P. syringae and necrotrophic fungal pathogens. Located in nucleus. Involved in response to various abiotic stresses - especially salt stress. Regulates cytochrome P450 gene CYP94B1 to control apoplastic barrier formation in roots to confer salt tolerance.	8327	0.646919	0.662226	0.659891	0.736711	0.501933	0.504267	0.522483	0.567584
MP00304	AT2G40740	WRKY55	WRKY	member of WRKY Transcription Factor; Group III	6981	0.472377	0.486	0.48595	0.542485	0.504874	0.495877	0.511777	0.548197
MP00620	AT2G45190	YAB1	YABBY	Encodes a member of the YABBY family of transcriptional regulators that is involved in abaxial cell type specification in leaves and fruits. YAB1 acts in a non-cell autonomous fashion within the meristem to affect phyllotactic patterning. The non-autonomous effect on the central region of the meristem is mediated through the activity if Lateral Suppressor (LAS).	5169	0.386575	0.438875	0.67195	0.706205	0.402421	0.44233	0.608089	0.62971
MP00076	AT2G45660	SOC1	MIKC_MADS	Controls flowering and is required for CO to promote flowering. It acts downstream of FT. Overexpression of (SOC1) AGL20 suppresses not only the late flowering of plants that have functional FRI and FLC alleles but also the delayed phase transitions during the vegetative stages of development. AGL20/SOC1 acts with AGL24 to promote flowering and inflorescence meristem identity.AGL20 upregulates ex…	53435	0.761331	0.953603	1.07699	1.08992	0.510153	0.614132	0.664189	0.665749
MP00319	AT2G46590	DOF2.5	Dof	Encodes a protein containing Dof zinc finger motifs that is a positive regulator of light-mediated seed germination. Its expression is limited to vascular system of the mother plant. A recessive mutation is inherited as maternal-effect and expression is not detected in the embryo. Mutants are defective in seed germination and are more dependent on light and cold treatment and less sensitive to gi…	3020	0.476121	0.630749	0.690187	0.708385	0.432246	0.549974	0.57593	0.584581
MP00603	AT2G47070	SPL1	SBP	member of SPL gene family, encodes DNA binding proteins and putative transcription factors. All have the SBP-box, which encodes the SBP-domain, required for and sufficient for interaction with DNA.	9134	1.17995	0.990076	0.884163	0.919037	0.73434	0.61459	0.57541	0.593449
MP00322	AT3G01220	ATHB-20	HD-ZIP	Encodes a homeodomain leucine zipper class I (HD-Zip I) protein. Expressed during seed germination in the micropylar endosperm and in the root cap, and increases ABA sensitivity and seed dormancy when mutated. The mRNA is cell-to-cell mobile.	1500	0.434951	0.478276	0.70718	0.734583	0.389544	0.414872	0.574403	0.596206
MP00323	AT3G01470	HAT5	HD-ZIP	Upstream open reading frames (uORFs) are small open reading frames found in the 5' UTR of a mature mRNA, and can potentially mediate translational regulation of the largest, or major, ORF (mORF). CPuORF33 represents a conserved upstream opening reading frame relative to major ORF AT3G01470.1. It regulates the translation of the main orf AtHB1.	769	0.43407	0.501914	0.746738	0.739658	0.399379	0.435104	0.606211	0.619608
MP00330	AT3G03660	WOX11	WOX	Encodes a WUSCHEL-related homeobox gene family member with 65 amino acids in its homeodomain. Proteins in this family contain a sequence of eight residues (TLPLFPMH) downstream of the homeodomain called the WUS box. Together with WOX12, WOX11 is involved in de novo root organogenesis.	10326	0.477655	0.464879	0.936703	1.08138	0.403552	0.3926	0.681807	0.792542
MP00113	AT3G12130	AT3G12130	C3H	KHZ1 is a CCCH zinc-finger and KH domain protein belonging to the VII subfamily. It is expressed throughout the plant. Highly similar to KHZ2. khz1 mutants are late flowering and double mutants with khz2 are even more late flowering. Overexpression leads to increased rates of leaf senescence.	10084	0.509118	0.656878	0.744231	0.754068	0.442782	0.549012	0.582147	0.589421
MP00359	AT3G15270	SPL5	SBP	Encodes a member of the SPL (squamosa-promoter binding protein-like)gene family, a novel gene family encoding DNA binding proteins and putative transcription factors. Contains the SBP-box, which encodes the SBP-domain, required and sufficient for interaction with DNA. It is involved in regulation of flowering and vegetative phase change. Its temporal expression is regulated by the microRNA miR156…	4864	0.855178	0.701135	0.750606	0.8014	0.676547	0.563872	0.567004	0.59527
MP00370	AT3G22780	TSO1	CPP	CHC protein involved in cell cycle progression (positive regulator).	3376	0.316409	0.410325	0.615914	0.63649	0.351565	0.427211	0.562725	0.573959
MP00083	AT3G24650	ABI3	B3	Homologous to the maize transcription factor Viviparous-1. Full length ABI3 protein binds to the highly conserved RY motif [DNA motif CATGCA(TG)], present in many seed-specific promoters, and the B3 domains of this transcription factor is necessary for the specific interaction with the RY element. Transcriptional activity of ABI3 requires the B3 DNA-binding domain and an activation domain. In add…	44076	0.928425	0.735701	0.611532	0.597721	0.671104	0.534318	0.463175	0.456785
MP00382	AT3G26790	FUS3	B3	Transcriptional factor with high similarity to the B3 region of the VP1/ABI3-like proteins. Full length FUS3 protein binds to the highly conserved RY motif [DNA motif CATGCA(TG)], present in many seed-specific promoters, and the B3 domains of this transcription factor is necessary for the specific interaction with the RY element. Transcriptional activity of FUS3 requires the B3 DNA-binding domain…	45998	1.03785	0.818981	0.697662	0.697499	0.651562	0.519316	0.466507	0.46952
MP00387	AT3G28920	ZHD9	ZF-HD	homeobox protein 34;(source:Araport11)	6160	0.456478	0.45319	0.868344	1.00265	0.390635	0.378244	0.649673	0.755444
MP00392	AT3G45610	DOF3.2	Dof	PEAR protein involved in the formation of a short-range concentration gradient that peaks at protophloem sieve elements, and activates gene expression that promotes radial growth. Locally promotes transcription of inhibitory HD-ZIP III genes, and thereby establishes a negative-feedback loop that forms a robust boundary that demarks the zone of cell division.	10307	0.577074	0.764064	0.901859	0.935158	0.438455	0.553822	0.602667	0.615951
MP00394	AT3G47500	CDF3	Dof	Dof-type zinc finger domain-containing protein, identical to H-protein promoter binding factor-2a GI:3386546 from (Arabidopsis thaliana). Interacts with LKP2 and FKF1, but its overexpression does not change flowering time under short or long day conditions.	3125	0.53474	0.686739	0.746647	0.754424	0.441041	0.54513	0.565498	0.570591
MP00402	AT3G50410	DOF3.4	Dof	Arabidopsis Dof protein containing a single 51-amino acid zinc finger DNA-binding domain, which may play an important roles in plant growth and development.	9396	0.580576	0.741181	0.840821	0.862818	0.436238	0.543019	0.582773	0.591719
MP00405	AT3G52440	AT3G52440	Dof	Dof-type zinc finger DNA-binding family protein;(source:Araport11)	7737	0.525472	0.662434	0.72566	0.73645	0.432027	0.533	0.559906	0.568572
MP00407	AT3G55370	OBP3	Dof	Encodes a nuclear localized Dof domain containing transcription factor expressed primarily in roots. Responsive to salicylic acid. Transgenic overexpressors have yellow leaves and short, defective roots.	20473	0.619066	0.840733	1.0369	1.0796	0.436772	0.562162	0.638216	0.652416
MP00408	AT3G56400	WRKY70	WRKY	Member of WRKY Transcription Factor; Group III. Function as activator of SA-dependent defense genes and a repressor of JA-regulated genes. WRKY70-controlled suppression of JA-signaling is partly executed by NPR1.	2755	0.61526	0.547249	0.52644	0.61224	0.555171	0.531276	0.528037	0.580785
MP00412	AT3G57920	SPL15	SBP	Encodes a putative transcriptional regulator that is involved in the vegetative to reproductive phase transition. Expression is regulated by MIR156b.	5233	0.763563	0.65062	0.587396	0.596049	0.649447	0.556767	0.541559	0.558938
MP00418	AT3G61150	HDG1	HD-ZIP	Encodes a homeobox-leucine zipper family protein belonging to the HD-ZIP IV family.	1082	0.423273	0.490093	0.77709	0.83158	0.398451	0.45226	0.631098	0.663852
MP00421	AT4G00730	ANL2	HD-ZIP	Encodes a homeodomain protein of the HD-GLABRA2 group. Involved in the accumulation of anthocyanin and in root development. Loss of function mutants have increased cell wall polysaccharide content.	5916	0.429684	0.505938	0.764305	0.789455	0.406894	0.467766	0.624041	0.637876
MP00115	AT4G01720	WRKY47	WRKY	member of WRKY Transcription Factor; Group II-b	4583	0.482924	0.50471	0.529279	0.574029	0.470129	0.47308	0.502055	0.532621
MP00433	AT4G14770	TCX2	CPP	Regulates fate transition and cell Divisions in the stomatal lineage.	3727	0.319854	0.404069	0.599935	0.607533	0.357137	0.439996	0.568356	0.570183
MP00434	AT4G15090	FAR1	FAR1	Encodes a nuclear localized protein involved in far red light response signaling. Loss of function mutants are defective in far red light responses. For example:prevents leaf senescence under high ratio of red/far-red light conditions.Interacts with homologous gene FHY3.	7096	0.789059	0.664261	0.584651	0.561716	0.804162	0.684065	0.622687	0.598063
MP00444	AT4G18890	BEH3	BES1	BES1/BZR1 homolog 3;(source:Araport11)	2879	0.62576	0.511268	0.415704	0.414618	0.84065	0.819371	0.699282	0.689386
MP00445	AT4G21030	DOF4.2	Dof	Encodes a nuclear protein that can bind DNA in a sequence specific manner and is involved in seed coat development and shoot branching. It has been shown to activate transcription of a target gene, AtEXPA9.	12247	0.587087	0.774174	0.89529	0.923488	0.44733	0.561196	0.603152	0.612355
MP00448	AT4G23550	WRKY29	WRKY	Encodes WRKY DNA-binding protein 29 (WRKY29). The mRNA is cell-to-cell mobile.	305	0.547411	0.62024	0.62617	0.642778	0.504973	0.543572	0.573953	0.591015
MP00038	AT4G34000	ABF3	bZIP	Encodes an ABA-responsive element-binding protein with similarity to transcription factors that is expressed in response to stress and abscisic acid.	2654	0.987691	0.973112	0.635559	0.593775	0.707486	0.691173	0.550763	0.503662
MP00108	AT4G35580	NTL9	NAC	Encodes a calmodulin-binding NAC protein (CBNAC). Contains calmodulin-binding domain in the C-terminus of the protein. Functions as a calmodulin-regulated transcriptional repressor.	5855	0.452842	0.465469	0.836719	0.927601	0.357279	0.368752	0.617153	0.684212
MP00039	AT4G36730	GBF1	bZIP	member of a gene family encoding basic leucine zipper proteins (GBFs) which bind the G-box	12919	0.421645	0.483756	0.319231	0.396078	0.763646	0.741753	0.639463	0.617394
MP00473	AT4G36740	HB-5	HD-ZIP	Encodes a homeodomain leucine zipper class I (HD-Zip I) protein.	4306	0.473038	0.536725	0.790252	0.822674	0.403576	0.450117	0.600574	0.620842
MP00478	AT4G38000	DOF4.7	Dof	DNA binding with one finger 4.7;(source:Araport11)	19189	0.535478	0.746168	0.92028	0.961492	0.403328	0.529387	0.609242	0.623774
MP00483	AT5G02460	DOF5.1	Dof	PEAR protein involved in the formation of a short-range concentration gradient that peaks at protophloem sieve elements, and activates gene expression that promotes radial growth. Locally promotes transcription of inhibitory HD-ZIP III genes, and thereby establishes a negative-feedback loop that forms a robust boundary that demarks the zone of cell division.	19485	0.631968	0.84418	0.998363	1.03106	0.43666	0.553464	0.6123	0.622981
MP00486	AT5G03790	ATHB-51	HD-ZIP	Encodes a homeodomain leucine zipper class I (HD-Zip I) meristem identity regulator that acts together with LFY to induce CAL expression. It binds to the CAL promoter proximal CAATNATTG element. LMI1 acts primarily downstream of LFY in meristem identity regulation. The interaction between LFY, LMI1 and CAL resembles a feed-forward loop transcriptional network motif. The gene also had additional L…	6588	0.474189	0.532762	0.769414	0.787577	0.432178	0.47828	0.617244	0.633836
MP00610	AT5G17430	BBM	AP2	Encodes an AP2-domain containing protein similar to ANT. Expressed in embryos and lateral root primordium. PLT4 acts after PLT3,5 and 7 during lateral roof formation.	59683	0.724801	0.936052	1.08692	1.11085	0.4837	0.595476	0.656729	0.663552
MP00516	AT5G17800	MYB56	MYB	Member of the R2R3 factor gene family that acts as a cell-specific repressor of quiescent center (QC) divisions in the primary root, acting through the BR signaling pathway. Works with BES1 to regulate QC division in the root.	1794	0.366527	0.378585	0.527737	0.602688	0.403971	0.420005	0.508662	0.560898
MP00604	AT5G18830	SPL7	SBP	Encodes a member of the Squamosa Binding Protein family of transcriptional regulators. SPL7 is expressed highly in roots and appears to play a role in copper homeostasis. Mutants are hypersensitive to copper deficient conditions and display a retarded growth phenotype. SPL7 binds to the promoter of the copper responsive miRNAs miR398b and miR389c.	7770	0.748051	0.617321	0.543628	0.550095	0.755122	0.625093	0.56889	0.567895
MP00080	AT5G20240	PI	MIKC_MADS	Floral homeotic gene encoding a MADS domain transcription factor. Required for the specification of petal and stamen identities.	19367	0.60692	0.768376	0.88813	0.90466	0.470866	0.568059	0.607118	0.611615
MP00536	AT5G39760	ZHD10	ZF-HD	Functions together with TZP in co-regulation of the expression of blue-light dependent transcriptional regulators. Coassociates with and regulates the expression of light-regulated loci as well as transcriptional regulators to shape plant development in response to environmental stimuli with targets in RNA processing factors as well as proteins involved in salt stress and ABA signaling, in additi…	6095	0.460226	0.500065	0.952717	1.11283	0.393865	0.403604	0.687542	0.79353
MP00540	AT5G42520	BPC6	BBR-BPC	Encodes a member of the BASIC PENTACYSTEINE (BPC) proteins. BPC proteins are plant-specific transcription factors present throughout land plants. BPC transcription factor family is integral for a wide range of processes that support normal growth and development.	52202	0.895433	1.04565	1.09563	1.09024	0.640853	0.731744	0.761445	0.757652
MP00543	AT5G45300	BMY2	BES1	Encodes a beta-amylase-like protein present in the nucleus rather than targeted to the chloroplast. Contains BRASSINAZOLE RESISTANT1 (BZR1)-type DNA binding domains. Activates gene expression in protoplast transactivation assays.	12860	0.879716	0.811963	0.657252	0.644318	0.768048	0.716313	0.609847	0.594329
MP00547	AT5G46830	BHLH28	bHLH	Calcium-binding transcription factor involved in salt stress signaling.	792	0.955588	0.743579	0.746505	0.811405	0.62918	0.552428	0.558192	0.579789
MP00552	AT5G47660	AT5G47660	Trihelix	Homeodomain-like superfamily protein;(source:Araport11)	3446	0.414611	0.469469	0.729537	0.832953	0.401423	0.439733	0.617206	0.657292
MP00559	AT5G52170	HDG7	HD-ZIP	Encodes a homeobox-leucine zipper family protein belonging to the HD-ZIP IV family.	4821	0.433676	0.508202	0.751211	0.777456	0.408693	0.468181	0.615118	0.627783
MP00071	AT5G56270	WRKY2	WRKY	Encodes WRKY transcription factor 2, a zinc-finger protein. In wrky2 mutants, egg cells polarize normally but zygotes fail to reestablish polar organelle positioning from a transient symmetric state, resulting in equal cell division and distorted embryo development.	1821	0.75781	0.734966	0.640281	0.801756	0.613866	0.589558	0.549312	0.653474
MP00569	AT5G60130	AT5G60130	B3	AP2/B3-like transcriptional factor family protein;(source:Araport11)	12842	0.611389	0.805102	1.00516	1.04184	0.430373	0.537761	0.620928	0.634009
MP00570	AT5G60850	DOF5.4	Dof	Encodes a zinc finger protein.	9220	0.43931	0.594413	0.703739	0.720898	0.404161	0.518391	0.563431	0.573455
MP00580	AT5G62940	DOF5.6	Dof	HCA2 induces the formation of interfascicular cambium and regulates vascular tissue development in the aerial parts of the plant. Evidence from both gain of function and dominant negative alleles. PEAR protein involved in the formation of a short-range concentration gradient that peaks at protophloem sieve elements, and activates gene expression that promotes radial growth. Locally promotes trans…	3179	0.55133	0.694175	0.785876	0.813657	0.427489	0.519684	0.559327	0.573203
MP00588	AT5G65410	ZHD1	ZF-HD	Encodes ZFHD2, a member of the zinc finger homeodomain transcriptional factor family.Gain of function of ATHB25 (35S and UBQ10 proomoters) and double loss of function of ATHB25 and ATHB22 increases and decreases, respectively, seed longevity. This phenotype is maternal and related to seed coat alterations. Gain of function increases expression of GA3OX2 and GA4 and GA1 levels. Together with REM7 …	7923	0.456501	0.442553	0.900447	1.02645	0.393585	0.377112	0.667484	0.766716
MP00593	AT5G66940	DOF5.8	Dof	Encodes a nuclear localized DOF-domain binding transcription factor.	13106	0.558659	0.762528	0.91433	0.955646	0.421033	0.546258	0.610602	0.624658

## Sheet: Table S12
Table S12. Enriched upstream motifs of each RNA cluster.
RNA.cluster	Motif.tairID	Motif.tairName	Family	Fold.Enrichment	pvalue	p.adjust	qvalue
C1	AT3G54990	SMZ	AP2	1.38486	3.87e-13	1.76e-12	4.04e-13
C1	AT5G17430	BBM	AP2	1.18232	8.14e-11	3.07e-10	7.05e-11
C1	AT3G24650	ABI3	B3	1.27784	9.07e-16	4.92e-15	1.13e-15
C1	AT1G28300	LEC2	B3	1.25392	5.59e-15	2.83e-14	6.51e-15
C1	AT3G26790	FUS3	B3	1.21748	2.52e-11	9.88e-11	2.27e-11
C1	AT4G38910	BPC5	BBR-BPC	1.3844	9.8e-20	7.31e-19	1.68e-19
C1	AT2G01930	BPC1	BBR-BPC	1.30986	6.38e-29	8.98e-28	2.06e-28
C1	AT5G42520	BPC6	BBR-BPC	1.29009	8.88e-21	7.23e-20	1.66e-20
C1	AT5G45300	BMY2	BES1	1.59496	5.31e-31	1.03e-29	2.36e-30
C1	AT1G19350	BES1	BES1	1.58322	6.31e-43	2.61e-41	5.98e-42
C1	AT1G78700	BEH4	BES1	1.54889	3.08e-32	6.36e-31	1.46e-31
C1	AT4G18890	BEH3	BES1	1.53825	4.43e-30	7.04e-29	1.62e-29
C1	AT1G75080	BZR1	BES1	1.50232	1.19e-20	9.56e-20	2.19e-20
C1	AT4G36780	BEH2	BES1	1.45689	7.16e-25	8.69e-24	2e-24
C1	AT5G38860	BIM3	bHLH	1.66638	1.15e-29	1.78e-28	4.08e-29
C1	AT5G08130	BIM1	bHLH	1.64264	9.08e-33	2.16e-31	4.96e-32
C1	AT4G14410	BHLH104	bHLH	1.63509	1.45e-28	1.99e-27	4.57e-28
C1	AT2G22750	AT2G22750	bHLH	1.63202	4.78e-29	7.22e-28	1.66e-28
C1	AT1G69010	BIM2	bHLH	1.61627	2.85e-30	4.64e-29	1.06e-29
C1	AT4G36930	SPT	bHLH	1.59773	9.4e-38	2.91e-36	6.68e-37
C1	AT4G17880	MYC4	bHLH	1.59341	3.8e-31	7.58e-30	1.74e-30
C1	AT4G00050	UNE10	bHLH	1.58862	9.25e-35	2.49e-33	5.72e-34
C1	AT5G46760	MYC3	bHLH	1.56974	3.77e-23	3.79e-22	8.69e-23
C1	AT4G21330	DYT1	bHLH	1.56928	8.33e-17	4.91e-16	1.13e-16
C1	AT3G23210	BHLH34	bHLH	1.56614	3.82e-19	2.68e-18	6.16e-19
C1	AT2G20180	PIF1	bHLH	1.56405	2.63e-30	4.4e-29	1.01e-29
C1	AT1G01260	BHLH13	bHLH	1.56022	2.73e-22	2.56e-21	5.88e-22
C1	AT4G16430	BHLH3	bHLH	1.56022	2.73e-22	2.56e-21	5.88e-22
C1	AT1G10120	BHLH74	bHLH	1.55842	3.06e-18	1.99e-17	4.58e-18
C1	AT4G30980	LRL2	bHLH	1.55793	1.3e-32	2.88e-31	6.62e-32
C1	AT2G24260	BHLH66	bHLH	1.54236	5.33e-21	4.4e-20	1.01e-20
C1	AT2G18300	AT2G18300	bHLH	1.5384	7.3e-31	1.37e-29	3.15e-30
C1	AT2G43010	PIF4	bHLH	1.51201	3.86e-34	9.95e-33	2.28e-33
C1	AT3G59060	PIF5	bHLH	1.50111	1.68e-36	4.95e-35	1.14e-35
C1	AT2G46510	AIB	bHLH	1.49809	1.21e-20	9.64e-20	2.21e-20
C1	AT1G32640	MYC2	bHLH	1.49672	2.37e-23	2.57e-22	5.91e-23
C1	AT5G61270	BHLH72	bHLH	1.4898	3.07e-23	3.17e-22	7.28e-23
C1	AT1G09530	PIF3	bHLH	1.48575	1.25e-32	2.87e-31	6.59e-32
C1	AT3G23690	BHLH77	bHLH	1.47759	1.6e-20	1.24e-19	2.84e-20
C1	AT1G59640	BPE	bHLH	1.38168	2.08e-10	7.77e-10	1.78e-10
C1	AT2G31220	BHLH10	bHLH	1.34895	1.41e-08	4.59e-08	1.05e-08
C1	AT1G49720	ABF1	bZIP	1.67509	4.92e-47	2.77e-45	6.35e-46
C1	AT4G36730	GBF1	bZIP	1.6578	3.98e-45	1.89e-43	4.35e-44
C1	AT3G56850	DPBF3	bZIP	1.62508	5.46e-34	1.35e-32	3.1e-33
C1	AT2G36270	ABI5	bZIP	1.60459	1.57e-28	2.11e-27	4.85e-28
C1	AT2G35530	BZIP16	bZIP	1.59132	1.53e-32	3.26e-31	7.5e-32
C1	AT1G32150	BZIP68	bZIP	1.56116	5.47e-29	8.07e-28	1.85e-28
C1	AT5G28770	BZIP63	bZIP	1.55968	5.63e-29	8.11e-28	1.86e-28
C1	AT1G45249	ABF2	bZIP	1.55861	5.12e-22	4.66e-21	1.07e-21
C1	AT2G46270	GBF3	bZIP	1.54608	1.15e-27	1.51e-26	3.47e-27
C1	AT3G10800	BZIP28	bZIP	1.53645	6.37e-24	7.17e-23	1.65e-23
C1	AT5G15830	AtbZIP3	bZIP	1.50445	1.04e-23	1.15e-22	2.64e-23
C1	AT2G18160	BZIP2	bZIP	1.49349	6.68e-23	6.57e-22	1.51e-22
C1	AT4G34590	BZIP11	bZIP	1.48981	6.25e-20	4.78e-19	1.1e-19
C1	AT3G62420	BZIP53	bZIP	1.48151	4.78e-19	3.33e-18	7.64e-19
C1	AT1G06070	BZIP69	bZIP	1.4815	4.41e-11	1.71e-10	3.92e-11
C1	AT2G21230	AT2G21230	bZIP	1.47117	1.84e-13	8.55e-13	1.96e-13
C1	AT2G40620	BZIP18	bZIP	1.46056	1.76e-14	8.79e-14	2.02e-14
C1	AT1G75390	BZIP44	bZIP	1.4595	1.45e-19	1.07e-18	2.45e-19
C1	AT1G06850	AtbZIP52	bZIP	1.44843	5.35e-12	2.17e-11	4.97e-12
C1	AT2G04038	AtbZIP48	bZIP	1.44717	1.86e-19	1.35e-18	3.11e-19
C1	AT3G30530	ATBZIP42	bZIP	1.41225	7.37e-19	5.07e-18	1.16e-18
C1	AT5G11260	HY5	bZIP	1.40466	2.82e-12	1.17e-11	2.69e-12
C1	AT5G06839	TGA10	bZIP	1.37031	2.04e-07	5.92e-07	1.36e-07
C1	AT5G10030	TGA4	bZIP	1.36216	4.85e-10	1.78e-09	4.08e-10
C1	AT5G38800	BZIP43	bZIP	1.34532	2.08e-14	1.02e-13	2.34e-14
C1	AT2G17180	ZAT2	C2H2	1.39446	9.63e-12	3.87e-11	8.89e-12
C1	AT1G72050	TFIIIA	C2H2	1.34479	9.75e-67	6.04e-64	1.39e-64
C1	AT3G46070	AT3G46070	C2H2	1.31198	6.69e-09	2.26e-08	5.2e-09
C1	AT3G60580	ZAT9	C2H2	1.29279	4.97e-11	1.9e-10	4.36e-11
C1	AT5G09410	EICBP.B	CAMTA	1.83344	1.46e-30	2.66e-29	6.12e-30
C1	AT2G22300	CAMTA3	CAMTA	1.74814	3.43e-18	2.21e-17	5.07e-18
C1	AT4G16150	AT4G16150	CAMTA	1.74075	8e-22	7.07e-21	1.62e-21
C1	AT5G64220	CAMTA2	CAMTA	1.71056	8.21e-19	5.58e-18	1.28e-18
C1	AT5G62940	DOF5.6	Dof	1.24733	6.11e-08	1.85e-07	4.24e-08
C1	AT5G22220	E2FB	E2F/DP	1.50778	2.52e-25	3.12e-24	7.17e-25
C1	AT1G63030	DREB1E	ERF	1.42258	4.69e-14	2.25e-13	5.17e-14
C1	AT1G78080	RAP2-4	ERF	1.41895	3.79e-17	2.28e-16	5.23e-17
C1	AT4G25490	DREB1B	ERF	1.40248	3.69e-09	1.26e-08	2.9e-09
C1	AT3G60490	ERF035	ERF	1.40118	3.39e-08	1.05e-07	2.42e-08
C1	AT1G74930	ERF018	ERF	1.37358	8.45e-13	3.69e-12	8.46e-13
C1	AT1G19210	ERF017	ERF	1.36094	5.45e-16	2.98e-15	6.85e-16
C1	AT4G06746	RAP2-9	ERF	1.36018	4.48e-08	1.38e-07	3.17e-08
C1	AT1G01250	ERF023	ERF	1.35235	9.25e-10	3.31e-09	7.6e-10
C1	AT2G44940	ERF034	ERF	1.3484	4.9e-08	1.49e-07	3.43e-08
C1	AT2G23340	ERF008	ERF	1.3363	9.58e-09	3.22e-08	7.4e-09
C1	AT1G21910	ERF012	ERF	1.31769	1.36e-15	7.21e-15	1.65e-15
C1	AT1G22810	ERF019	ERF	1.3001	3.79e-23	3.79e-22	8.69e-23
C1	AT2G40340	DREB2C	ERF	1.28784	5.68e-22	5.1e-21	1.17e-21
C1	AT1G36060	ERF055	ERF	1.2826	2.33e-12	9.74e-12	2.24e-12
C1	AT3G57600	DREB2F	ERF	1.26616	2.83e-22	2.62e-21	6.01e-22
C1	AT1G77640	ERF013	ERF	1.25571	1.56e-07	4.61e-07	1.06e-07
C1	AT5G25390	SHN3	ERF	1.25349	3.01e-19	2.14e-18	4.91e-19
C1	AT5G18450	DREB2G	ERF	1.2509	2.51e-19	1.81e-18	4.15e-19
C1	AT3G50260	ERF011	ERF	1.24957	7.75e-13	3.4e-12	7.81e-13
C1	AT4G27950	CRF4	ERF	1.24768	1.98e-15	1.04e-14	2.38e-15
C1	AT1G75490	DREB2D	ERF	1.24756	1.12e-15	6.04e-15	1.39e-15
C1	AT4G28140	ERF054	ERF	1.23991	2.96e-11	1.15e-10	2.65e-11
C1	AT5G65130	AT5G65130	ERF	1.23967	1.05e-17	6.66e-17	1.53e-17
C1	AT1G71450	ERF021	ERF	1.23816	2.6e-14	1.26e-13	2.89e-14
C1	AT5G67190	ERF010	ERF	1.23367	1.8e-09	6.31e-09	1.45e-09
C1	AT5G25190	ERF003	ERF	1.22735	8.92e-13	3.86e-12	8.86e-13
C1	AT1G44830	ERF014	ERF	1.22635	1.28e-12	5.43e-12	1.25e-12
C1	AT3G20310	ERF7	ERF	1.22198	1.22e-11	4.87e-11	1.12e-11
C1	AT1G46768	RAP2-1	ERF	1.21583	1.11e-08	3.71e-08	8.52e-09
C1	AT5G47230	ERF5	ERF	1.21386	2.56e-13	1.18e-12	2.72e-13
C1	AT5G61600	ERF104	ERF	1.19526	1.9e-09	6.61e-09	1.52e-09
C1	AT5G44210	ERF9	ERF	1.19118	1.18e-08	3.87e-08	8.88e-09
C1	AT1G68550	ERF118	ERF	1.17627	2.13e-08	6.8e-08	1.56e-08
C1	AT5G07310	ERF115	ERF	1.17126	2.35e-08	7.46e-08	1.71e-08
C1	AT1G53170	ERF8	ERF	1.16541	3.28e-07	9.23e-07	2.12e-07
C1	AT1G28360	ERF12	ERF	1.15397	1.6e-08	5.14e-08	1.18e-08
C1	AT2G18380	GATA20	GATA	1.36062	8.52e-11	3.2e-10	7.34e-11
C1	AT4G36620	GATA19	GATA	1.3439	5.29e-10	1.93e-09	4.42e-10
C1	AT1G51600	GATA28	GATA	1.34021	8.55e-14	4.04e-13	9.27e-14
C1	AT3G24050	GATA1	GATA	1.33317	1.85e-22	1.79e-21	4.12e-22
C1	AT3G06740	GATA15	GATA	1.31993	1.53e-08	4.94e-08	1.13e-08
C1	AT3G21175	GATA24	GATA	1.31211	4.75e-12	1.95e-11	4.47e-12
C1	AT4G00250	STKL2	GeBP	1.55942	2.05e-16	1.15e-15	2.65e-16
C1	AT4G00270	GEBP	GeBP	1.41402	1.25e-27	1.61e-26	3.69e-27
C1	AT2G01570	RGA	GRAS	1.23288	1.08e-16	6.33e-16	1.45e-16
C1	AT1G52150	ATHB-15	HD-ZIP	1.37407	3.8e-09	1.29e-08	2.97e-09
C1	AT1G30490	ATHB-9	HD-ZIP	1.36739	1.03e-08	3.44e-08	7.89e-09
C1	AT5G47370	HAT2	HD-ZIP	1.31375	2.55e-08	8.06e-08	1.85e-08
C1	AT3G61890	ATHB-12	HD-ZIP	1.30035	1.48e-08	4.8e-08	1.1e-08
C1	AT2G46680	ATHB-7	HD-ZIP	1.29362	2.06e-07	5.96e-07	1.37e-07
C1	AT5G43840	HSFA6A	HSF	2.36509	2.45e-49	1.9e-47	4.36e-48
C1	AT4G11660	HSFB2B	HSF	2.33659	2.07e-56	3.2e-54	7.34e-55
C1	AT1G46264	HSFB4	HSF	2.29266	8.35e-55	8.62e-53	1.98e-53
C1	AT3G22830	HSFA6B	HSF	2.28737	2.04e-52	1.81e-50	4.15e-51
C1	AT5G16820	HSFA1B	HSF	2.10308	1.29e-47	7.96e-46	1.83e-46
C1	AT3G02990	HSFA1E	HSF	2.05182	3.54e-39	1.16e-37	2.66e-38
C1	AT3G24520	HSFC1	HSF	2.03287	6.79e-44	3e-42	6.89e-43
C1	AT4G18880	HSFA4A	HSF	1.994	2.8e-21	2.34e-20	5.38e-21
C1	AT5G62020	HSFB2A	HSF	1.92083	1.69e-30	2.98e-29	6.85e-30
C1	AT2G41690	HSFB3	HSF	1.83379	1.17e-18	7.88e-18	1.81e-18
C1	AT1G65620	AS2	LBD	1.21202	8e-08	2.4e-07	5.52e-08
C1	AT5G63090	LOB	LBD	1.17473	1.48e-07	4.39e-07	1.01e-07
C1	AT5G62165	AGL42	MIKC_MADS	1.30571	1.9e-16	1.09e-15	2.5e-16
C1	AT2G45660	SOC1	MIKC_MADS	1.23219	4.81e-17	2.86e-16	6.57e-17
C1	AT5G20240	PI	MIKC_MADS	1.19716	3.01e-08	9.44e-08	2.17e-08
C1	AT1G60920	AGL55	M-type_MADS	1.27791	1.51e-21	1.28e-20	2.94e-21
C1	AT5G48670	AGL80	M-type_MADS	1.27791	1.51e-21	1.28e-20	2.94e-21
C1	AT2G02820	MYB88	MYB	1.62743	1.13e-41	4.37e-40	1e-40
C1	AT3G49690	RAX3	MYB	1.54068	1.01e-56	2.08e-54	4.78e-55
C1	AT3G47600	MYB94	MYB	1.52028	3.24e-26	4.09e-25	9.39e-26
C1	AT1G09540	MYB61	MYB	1.51947	3.55e-39	1.16e-37	2.66e-38
C1	AT5G62470	MYB96	MYB	1.51356	2.46e-30	4.23e-29	9.7e-30
C1	AT5G08520	SRM1	MYB	1.51124	4.36e-15	2.25e-14	5.16e-15
C1	AT3G28910	MYB30	MYB	1.49836	8.74e-35	2.46e-33	5.64e-34
C1	AT4G01680	MYB55	MYB	1.48168	7.09e-47	3.66e-45	8.39e-46
C1	AT5G04760	AT5G04760	MYB	1.473	6.21e-13	2.75e-12	6.3e-13
C1	AT3G11280	AT3G11280	MYB	1.4623	4.16e-16	2.3e-15	5.27e-16
C1	AT3G23250	MYB15	MYB	1.45104	2.47e-23	2.64e-22	6.05e-23
C1	AT1G18570	MYB51	MYB	1.4342	2.97e-13	1.36e-12	3.12e-13
C1	AT1G79180	ATMYB63	MYB	1.43221	1.31e-20	1.02e-19	2.35e-20
C1	AT1G08810	MYB60	MYB	1.42923	2.24e-17	1.4e-16	3.21e-17
C1	AT1G06180	ATMYB13	MYB	1.4282	1.43e-24	1.67e-23	3.84e-24
C1	AT3G61250	AtMYB17	MYB	1.42815	2.85e-23	2.99e-22	6.86e-23
C1	AT1G49010	AT1G49010	MYB	1.42387	5.7e-13	2.56e-12	5.87e-13
C1	AT1G74650	ATY13	MYB	1.41849	5.63e-24	6.45e-23	1.48e-23
C1	AT3G08500	MYB83	MYB	1.41483	3.37e-41	1.23e-39	2.82e-40
C1	AT5G05790	AT5G05790	MYB	1.41411	1.52e-13	7.11e-13	1.63e-13
C1	AT3G12720	ATY53	MYB	1.41165	1.91e-14	9.45e-14	2.17e-14
C1	AT5G49330	MYB111	MYB	1.40885	8.14e-20	6.15e-19	1.41e-19
C1	AT3G12820	AtMYB10	MYB	1.39755	1.86e-18	1.22e-17	2.81e-18
C1	AT1G16490	MYB58	MYB	1.37477	3.18e-17	1.95e-16	4.48e-17
C1	AT4G05100	AtMYB74	MYB	1.35381	6.03e-11	2.29e-10	5.26e-11
C1	AT5G12870	MYB46	MYB	1.34961	6.11e-13	2.72e-12	6.25e-13
C1	AT5G16600	MYB43	MYB	1.34351	4.42e-13	1.99e-12	4.58e-13
C1	AT5G14340	AtMYB40	MYB	1.3354	9.99e-13	4.3e-12	9.86e-13
C1	AT5G62320	MYB99	MYB	1.33371	8.85e-15	4.45e-14	1.02e-14
C1	AT4G17785	MYB39	MYB	1.3216	2.14e-09	7.41e-09	1.7e-09
C1	AT1G22640	MYB3	MYB	1.30884	3.48e-10	1.28e-09	2.94e-10
C1	AT1G34670	AtMYB93	MYB	1.30137	4.33e-08	1.34e-07	3.08e-08
C1	AT2G47460	MYB12	MYB	1.29636	1.17e-08	3.87e-08	8.88e-09
C1	AT5G10280	MYB92	MYB	1.29524	9.07e-10	3.26e-09	7.49e-10
C1	AT1G19000	AT1G19000	MYB_related	1.54942	2.6e-15	1.35e-14	3.11e-15
C1	AT1G74840	AT1G74840	MYB_related	1.53211	2.27e-14	1.11e-13	2.54e-14
C1	AT5G56840	AT5G56840	MYB_related	1.5002	1.1e-12	4.68e-12	1.07e-12
C1	AT5G58900	AT5G58900	MYB_related	1.45437	4.09e-12	1.69e-11	3.88e-12
C1	AT5G47390	KUA1	MYB_related	1.41847	8.1e-10	2.93e-09	6.73e-10
C1	AT3G10580	AT3G10580	MYB_related	1.38964	3.23e-09	1.11e-08	2.55e-09
C1	AT1G70000	AT1G70000	MYB_related	1.35863	1.8e-09	6.31e-09	1.45e-09
C1	AT1G18960	AT1G18960	MYB_related	1.31567	1.05e-09	3.73e-09	8.56e-10
C1	AT3G12910	AT3G12910	NAC	1.71337	1.5e-21	1.28e-20	2.94e-21
C1	AT5G39820	ANAC094	NAC	1.56078	5.08e-12	2.07e-11	4.75e-12
C1	AT2G43000	JUB1	NAC	1.51586	5.83e-08	1.77e-07	4.06e-08
C1	AT1G76420	NAC031	NAC	1.38682	3.14e-08	9.81e-08	2.25e-08
C1	AT5G04410	NAC078	NAC	1.35963	5.42e-18	3.46e-17	7.94e-18
C1	AT1G19040	AT1G19040	NAC	1.34206	1.83e-07	5.35e-07	1.23e-07
C1	AT1G34180	anac016	NAC	1.33328	1.41e-08	4.59e-08	1.05e-08
C1	AT1G32870	ANAC13	NAC	1.32717	4.52e-08	1.39e-07	3.18e-08
C1	AT4G17980	anac071	NAC	1.31981	2.57e-07	7.29e-07	1.67e-07
C1	AT1G61110	NAC025	NAC	1.29998	2.19e-07	6.28e-07	1.44e-07
C1	AT2G38880	NF-YB1	NF-YB	1.26759	4.48e-15	2.29e-14	5.26e-15
C1	AT1G20640	NLP4	Nin-like	1.2728	3.35e-10	1.24e-09	2.85e-10
C1	AT5G18830	SPL7	SBP	1.49185	3.5e-17	2.12e-16	4.88e-17
C1	AT1G53160	SPL4	SBP	1.3355	2.43e-07	6.94e-07	1.59e-07
C1	AT2G47070	SPL1	SBP	1.32185	3.04e-07	8.59e-07	1.97e-07
C1	AT1G67260	TCP1	TCP	1.47196	9.16e-08	2.74e-07	6.29e-08
C1	AT5G51910	TCP19	TCP	1.39759	1.34e-24	1.6e-23	3.67e-24
C1	AT3G47620	TCP14	TCP	1.3868	1.56e-11	6.19e-11	1.42e-11
C1	AT5G08070	TCP17	TCP	1.38002	2.02e-16	1.15e-15	2.63e-16
C1	AT3G02150	TCP13	TCP	1.37551	2.29e-12	9.64e-12	2.21e-12
C1	AT1G69690	TCP15	TCP	1.37061	1.23e-15	6.58e-15	1.51e-15
C1	AT1G35560	TCP23	TCP	1.34756	1.75e-18	1.16e-17	2.67e-18
C1	AT3G45150	TCP16	TCP	1.34452	1.76e-16	1.02e-15	2.34e-16
C1	AT2G45680	TCP9	TCP	1.33648	2.08e-07	5.98e-07	1.37e-07
C1	AT1G53230	TCP3	TCP	1.32153	1.51e-09	5.34e-09	1.22e-09
C1	AT1G72010	TCP22	TCP	1.31011	2.23e-11	8.8e-11	2.02e-11
C1	AT5G23280	TCP7	TCP	1.29179	4.62e-11	1.78e-10	4.08e-11
C1	AT4G18390	TCP2	TCP	1.28681	1.15e-07	3.41e-07	7.84e-08
C1	AT3G15030	TCP4	TCP	1.19387	1.66e-07	4.86e-07	1.12e-07
C1	AT5G01380	GT-3A	Trihelix	1.4979	6.09e-14	2.9e-13	6.66e-14
C2	AT1G19350	BES1	BES1	1.46186	6.6e-09	3.41e-07	2.33e-07
C2	AT2G43010	PIF4	bHLH	1.45508	9.66e-09	4.6e-07	3.14e-07
C2	AT1G72050	TFIIIA	C2H2	1.27664	2.39e-13	2.96e-11	2.02e-11
C2	AT3G22760	TCX3	CPP	3.10057	9.02e-29	5.58e-26	3.82e-26
C2	AT4G29000	TCX5	CPP	2.52891	3.99e-14	8.24e-12	5.63e-12
C2	AT4G14770	TCX2	CPP	2.37749	3.12e-14	8.24e-12	5.63e-12
C2	AT3G22780	TSO1	CPP	2.1847	5.31e-11	3.65e-09	2.5e-09
C2	AT2G20110	AT2G20110	CPP	1.94092	1.9e-08	7.53e-07	5.15e-07
C2	AT2G40220	ABI4	ERF	1.45369	4.33e-11	3.35e-09	2.29e-09
C2	AT4G27950	CRF4	ERF	1.37293	6.52e-10	3.67e-08	2.51e-08
C2	AT5G18450	DREB2G	ERF	1.29909	1.95e-08	7.53e-07	5.15e-07
C2	AT4G24470	ZIM	GATA	1.75403	8.69e-11	5.38e-09	3.68e-09
C2	AT4G32730	PC-MYB1	MYB	2.57069	9.35e-13	9.65e-11	6.6e-11
C2	AT5G11510	MYB3R4	MYB	2.52891	8.15e-14	1.26e-11	8.62e-12
C2	AT5G02320	MYB3R5	MYB	2.45936	2e-11	1.77e-09	1.21e-09
C2	AT1G35560	TCP23	TCP	1.43273	1.31e-08	5.8e-07	3.97e-07
C3	AT5G17430	BBM	AP2	1.33723	9.33e-18	2.89e-15	1.12e-15
C3	AT5G60130	AT5G60130	B3	1.33281	9.36e-08	7.33e-07	2.85e-07
C3	AT3G26790	FUS3	B3	1.25537	1.01e-08	1.03e-07	3.99e-08
C3	AT4G38910	BPC5	BBR-BPC	1.32061	1.68e-08	1.58e-07	6.14e-08
C3	AT5G42520	BPC6	BBR-BPC	1.25256	1.62e-09	1.82e-08	7.1e-09
C3	AT1G51140	BHLH122	bHLH	1.41976	1.22e-08	1.2e-07	4.67e-08
C3	AT2G42280	AT2G42280	bHLH	1.45299	2.99e-11	4.74e-10	1.85e-10
C3	AT1G35460	BHLH80	bHLH	1.46458	2.49e-11	4.05e-10	1.58e-10
C3	AT3G60580	ZAT9	C2H2	1.36084	3.92e-09	4.18e-08	1.63e-08
C3	AT2G01940	SGR5	C2H2	1.42726	4.55e-11	6.71e-10	2.61e-10
C3	AT1G32240	KAN2	G2-like	1.58421	5.72e-08	4.66e-07	1.82e-07
C3	AT2G01570	RGA	GRAS	1.24912	7.46e-11	1.05e-09	4.09e-10
C3	AT3G61150	HDG1	HD-ZIP	1.55124	3.37e-08	2.9e-07	1.13e-07
C3	AT4G17460	HAT1	HD-ZIP	1.44328	3.24e-08	2.86e-07	1.11e-07
C3	AT5G03790	ATHB-51	HD-ZIP	1.49561	1.07e-08	1.07e-07	4.15e-08
C3	AT5G65310	ATHB-5	HD-ZIP	1.49306	2.29e-09	2.49e-08	9.68e-09
C3	AT4G00730	ANL2	HD-ZIP	1.60511	1.28e-09	1.47e-08	5.74e-09
C3	AT5G66700	ATHB-53	HD-ZIP	1.53511	7.31e-10	8.7e-09	3.39e-09
C3	AT3G01470	HAT5	HD-ZIP	1.54797	3.51e-11	5.43e-10	2.11e-10
C3	AT3G61890	ATHB-12	HD-ZIP	1.50343	1.68e-11	2.89e-10	1.13e-10
C3	AT1G69780	ATHB-13	HD-ZIP	1.57285	5.68e-12	1.1e-10	4.28e-11
C3	AT5G47370	HAT2	HD-ZIP	1.55442	3.94e-12	7.86e-11	3.06e-11
C3	AT2G36610	ATHB-22	HD-ZIP	1.62262	2.4e-12	5.11e-11	1.99e-11
C3	AT2G22430	ATHB-6	HD-ZIP	1.59639	1.32e-12	3.27e-11	1.27e-11
C3	AT2G46680	ATHB-7	HD-ZIP	1.61916	2.7e-14	1.67e-12	6.5e-13
C3	AT2G45660	SOC1	MIKC_MADS	1.28473	6.65e-14	2.94e-12	1.14e-12
C3	AT2G38090	AT2G38090	MYB	1.54141	1.34e-08	1.29e-07	5.04e-08
C3	AT5G46590	anac096	NAC	1.49603	1.19e-07	9.06e-07	3.53e-07
C3	AT5G62380	NAC101	NAC	1.68346	9.02e-08	7.16e-07	2.79e-07
C3	AT5G13180	NAC083	NAC	1.68565	6.48e-08	5.21e-07	2.03e-07
C3	AT3G04060	anac046	NAC	1.73647	4.4e-08	3.68e-07	1.43e-07
C3	AT1G71930	NAC030	NAC	1.50991	2.71e-08	2.43e-07	9.47e-08
C3	AT1G79580	SMB	NAC	1.70127	8.93e-09	9.21e-08	3.59e-08
C3	AT3G61910	NAC066	NAC	1.49855	6.02e-09	6.32e-08	2.46e-08
C3	AT5G04410	NAC078	NAC	1.3372	2.16e-09	2.39e-08	9.29e-09
C3	AT1G54330	ANAC020	NAC	1.73254	6.28e-10	7.62e-09	2.97e-09
C3	AT1G61110	NAC025	NAC	1.54034	5.04e-11	7.26e-10	2.83e-10
C3	AT2G42400	VOZ2	VOZ	1.50595	1.37e-08	1.31e-07	5.09e-08
C3	AT2G17950	WUS	WOX	1.43324	2.44e-08	2.22e-07	8.64e-08
C3	AT3G03660	WOX11	WOX	1.52207	3.75e-10	4.84e-09	1.88e-09
C3	AT4G35550	WOX13	WOX	1.58541	4.23e-14	2.32e-12	9.02e-13
C3	AT1G80840	WRKY40	WRKY	1.47044	1.3e-07	9.84e-07	3.83e-07
C3	AT2G25000	WRKY60	WRKY	1.41254	1.14e-07	8.8e-07	3.43e-07
C3	AT2G21900	WRKY59	WRKY	1.46821	3.91e-08	3.31e-07	1.29e-07
C3	AT5G26170	WRKY50	WRKY	1.49668	3.28e-08	2.86e-07	1.11e-07
C3	AT4G22070	WRKY31	WRKY	1.60065	1.78e-08	1.65e-07	6.41e-08
C3	AT3G01970	WRKY45	WRKY	1.53572	4.85e-10	6.01e-09	2.34e-09
C3	AT5G01900	WRKY62	WRKY	1.49846	3.09e-10	4.07e-09	1.58e-09
C3	AT5G07100	WRKY26	WRKY	1.55179	2.7e-10	3.64e-09	1.42e-09
C3	AT2G46400	WRKY46	WRKY	1.53577	2.07e-10	2.84e-09	1.11e-09
C3	AT4G26640	WRKY20	WRKY	1.57535	4.42e-11	6.68e-10	2.6e-10
C3	AT4G31800	WRKY18	WRKY	1.55756	2.17e-11	3.64e-10	1.42e-10
C3	AT4G04450	WRKY42	WRKY	1.83632	1.12e-11	1.98e-10	7.72e-11
C3	AT4G24240	WRKY7	WRKY	1.63479	1.04e-11	1.89e-10	7.36e-11
C3	AT4G18170	WRKY28	WRKY	1.6276	5.89e-12	1.1e-10	4.3e-11
C3	AT2G30250	WRKY25	WRKY	1.5733	2.65e-12	5.47e-11	2.13e-11
C3	AT4G31550	WRKY11	WRKY	1.66053	2.32e-12	5.11e-11	1.99e-11
C3	AT5G46350	WRKY8	WRKY	1.6825	2.06e-12	4.71e-11	1.84e-11
C3	AT4G23550	WRKY29	WRKY	1.60461	1.95e-12	4.65e-11	1.81e-11
C3	AT2G38470	WRKY33	WRKY	1.58638	1.03e-12	2.66e-11	1.04e-11
C3	AT2G30590	WRKY21	WRKY	1.61632	8.56e-13	2.3e-11	8.97e-12
C3	AT2G46130	WRKY43	WRKY	1.6366	7.41e-13	2.08e-11	8.11e-12
C3	AT1G29860	WRKY71	WRKY	1.62027	4.73e-13	1.4e-11	5.43e-12
C3	AT2G47260	WRKY23	WRKY	1.54874	3.56e-13	1.17e-11	4.54e-12
C3	AT5G13080	WRKY75	WRKY	1.66358	3.7e-13	1.17e-11	4.54e-12
C3	AT5G52830	WRKY27	WRKY	1.69414	3.77e-13	1.17e-11	4.54e-12
C3	AT2G03340	WRKY3	WRKY	1.60718	1.92e-13	6.99e-12	2.72e-12
C3	AT5G41570	WRKY24	WRKY	1.67214	1.34e-13	5.19e-12	2.02e-12
C3	AT1G29280	WRKY65	WRKY	1.64811	9.53e-14	3.93e-12	1.53e-12
C3	AT4G01250	WRKY22	WRKY	1.69756	5.22e-14	2.48e-12	9.67e-13
C3	AT3G56400	WRKY70	WRKY	1.71237	4.49e-14	2.32e-12	9.02e-13
C3	AT2G24570	WRKY17	WRKY	1.66846	1.08e-14	8.08e-13	3.15e-13
C3	AT4G01720	WRKY47	WRKY	1.88544	2.89e-15	2.56e-13	9.95e-14
C3	AT1G30650	WRKY14	WRKY	1.7373	1.16e-15	1.2e-13	4.67e-14
C3	AT5G24110	WRKY30	WRKY	1.71926	7.02e-17	8.69e-15	3.38e-15
C3	AT2G23320	WRKY15	WRKY	1.72204	4.33e-17	7.91e-15	3.08e-15
C3	AT2G40740	WRKY55	WRKY	1.75784	5.11e-17	7.91e-15	3.08e-15
C3	AT1G69310	WRKY57	WRKY	1.76467	4.6e-19	2.85e-16	1.11e-16
C3	AT2G45190	YAB1	YABBY	1.60577	1.12e-09	1.3e-08	5.07e-09
C3	AT5G65410	ZHD1	ZF-HD	1.48743	4.66e-08	3.85e-07	1.5e-07
C3	AT2G02540	ZHD3	ZF-HD	1.60655	4.39e-10	5.54e-09	2.16e-09
C4	AT5G17430	BBM	AP2	1.31488	1.63e-17	8.41e-16	4.32e-16
C4	AT2G01930	BPC1	BBR-BPC	1.38032	5.66e-26	1.17e-23	6e-24
C4	AT4G38910	BPC5	BBR-BPC	1.43343	2.59e-15	1.14e-13	5.87e-14
C4	AT5G42520	BPC6	BBR-BPC	1.37591	1.44e-20	9.89e-19	5.08e-19
C4	AT1G72050	TFIIIA	C2H2	1.3065	6.34e-33	3.92e-30	2.02e-30
C4	AT3G60580	ZAT9	C2H2	1.37983	6.33e-11	1.87e-09	9.59e-10
C4	AT5G18450	DREB2G	ERF	1.19652	2.72e-08	7.33e-07	3.77e-07
C4	AT4G00250	STKL2	GeBP	1.95094	4.03e-25	6.23e-23	3.2e-23
C4	AT2G01570	RGA	GRAS	1.28751	2.88e-15	1.19e-13	6.11e-14
C4	AT2G45660	SOC1	MIKC_MADS	1.26582	1.05e-13	3.41e-12	1.75e-12
C4	AT1G49010	AT1G49010	MYB	1.49704	7.97e-11	2.24e-09	1.15e-09
C4	AT3G11280	AT3G11280	MYB	1.61604	1.68e-16	8e-15	4.11e-15
C4	AT5G04760	AT5G04760	MYB	1.84385	1.95e-21	1.51e-19	7.76e-20
C4	AT5G05790	AT5G05790	MYB	1.5109	2.9e-12	8.97e-11	4.61e-11
C4	AT5G08520	SRM1	MYB	1.89756	1.99e-24	2.47e-22	1.27e-22
C4	AT1G19000	AT1G19000	MYB_related	1.85711	2.98e-20	1.68e-18	8.61e-19
C4	AT1G70000	AT1G70000	MYB_related	1.75173	2.01e-20	1.24e-18	6.39e-19
C4	AT1G74840	AT1G74840	MYB_related	2.05154	2.85e-28	8.83e-26	4.54e-26
C4	AT3G10580	AT3G10580	MYB_related	1.68071	1.41e-14	4.84e-13	2.49e-13
C4	AT5G47390	KUA1	MYB_related	1.92147	7.62e-23	6.74e-21	3.46e-21
C4	AT5G56840	AT5G56840	MYB_related	1.72378	8.37e-15	3.24e-13	1.66e-13
C4	AT5G58900	AT5G58900	MYB_related	1.87872	5.86e-23	6.05e-21	3.1e-21
C4	AT5G61620	AT5G61620	MYB_related	1.74008	1.06e-14	3.87e-13	1.99e-13
C4	AT2G18350	ZHD6	ZF-HD	1.48122	3.32e-08	8.55e-07	4.39e-07
C5	AT5G10510	AIL6	AP2	1.68623	6.15e-10	4.73e-09	1.12e-09
C5	AT5G17430	BBM	AP2	1.24682	9.8e-13	1.35e-11	3.19e-12
C5	AT5G62000	ARF2	ARF	1.41006	1.79e-07	7.7e-07	1.82e-07
C5	AT1G28300	LEC2	B3	1.26953	1.05e-11	1.19e-10	2.8e-11
C5	AT1G49480	REM19	B3	1.24861	1.02e-09	7.43e-09	1.76e-09
C5	AT3G24650	ABI3	B3	1.25285	1.45e-09	1.01e-08	2.38e-09
C5	AT3G26790	FUS3	B3	1.28349	1.72e-12	2.28e-11	5.39e-12
C5	AT5G18090	AT5G18090	B3	1.4362	7.24e-09	4.04e-08	9.54e-09
C5	AT2G01930	BPC1	BBR-BPC	1.25321	4.2e-14	7.03e-13	1.66e-13
C5	AT4G38910	BPC5	BBR-BPC	1.28888	1.1e-08	5.7e-08	1.35e-08
C5	AT5G42520	BPC6	BBR-BPC	1.28985	1.69e-14	2.99e-13	7.06e-14
C5	AT1G19350	BES1	BES1	1.40208	2.07e-15	4.57e-14	1.08e-14
C5	AT1G75080	BZR1	BES1	1.37711	4.63e-09	2.78e-08	6.57e-09
C5	AT1G78700	BEH4	BES1	1.344	3.83e-10	3.04e-09	7.18e-10
C5	AT4G18890	BEH3	BES1	1.37459	2.78e-11	2.73e-10	6.46e-11
C5	AT4G36780	BEH2	BES1	1.46444	9.98e-18	3.86e-16	9.13e-17
C5	AT5G45300	BMY2	BES1	1.36912	1.16e-09	8.32e-09	1.97e-09
C5	AT1G01260	BHLH13	bHLH	1.35807	1.39e-07	6.14e-07	1.45e-07
C5	AT1G09530	PIF3	bHLH	1.3146	8.89e-11	8.33e-10	1.97e-10
C5	AT1G10120	BHLH74	bHLH	1.52516	1.47e-11	1.57e-10	3.72e-11
C5	AT1G59640	BPE	bHLH	1.57409	2.59e-14	4.46e-13	1.05e-13
C5	AT1G69010	BIM2	bHLH	1.37508	3.43e-09	2.19e-08	5.17e-09
C5	AT2G18300	AT2G18300	bHLH	1.35981	8.18e-11	7.79e-10	1.84e-10
C5	AT2G20180	PIF1	bHLH	1.4396	1.08e-13	1.68e-12	3.97e-13
C5	AT2G24260	BHLH66	bHLH	1.41726	1.44e-09	1.01e-08	2.38e-09
C5	AT2G43010	PIF4	bHLH	1.39828	3.11e-15	6.21e-14	1.47e-14
C5	AT3G23210	BHLH34	bHLH	1.62525	9.54e-16	2.19e-14	5.17e-15
C5	AT3G23690	BHLH77	bHLH	1.35714	5.98e-09	3.49e-08	8.25e-09
C5	AT3G59060	PIF5	bHLH	1.3879	4.43e-16	1.19e-14	2.82e-15
C5	AT4G00050	UNE10	bHLH	1.38411	1.33e-11	1.45e-10	3.42e-11
C5	AT4G14410	BHLH104	bHLH	1.37392	2.62e-08	1.31e-07	3.09e-08
C5	AT4G16430	BHLH3	bHLH	1.35807	1.39e-07	6.14e-07	1.45e-07
C5	AT4G17880	MYC4	bHLH	1.42548	3e-12	3.72e-11	8.79e-12
C5	AT4G30980	LRL2	bHLH	1.38088	8.98e-12	1.03e-10	2.43e-11
C5	AT4G36930	SPT	bHLH	1.40662	2.13e-13	3.07e-12	7.26e-13
C5	AT5G08130	BIM1	bHLH	1.39287	6.19e-10	4.73e-09	1.12e-09
C5	AT5G38860	BIM3	bHLH	1.4061	4.55e-09	2.76e-08	6.53e-09
C5	AT5G46760	MYC3	bHLH	1.44265	1.26e-10	1.07e-09	2.53e-10
C5	AT5G61270	BHLH72	bHLH	1.37352	2.49e-10	2.03e-09	4.79e-10
C5	AT1G32150	BZIP68	bZIP	1.37983	1.92e-10	1.58e-09	3.74e-10
C5	AT1G45249	ABF2	bZIP	1.47198	1.32e-11	1.45e-10	3.42e-11
C5	AT1G49720	ABF1	bZIP	1.31107	1.03e-08	5.43e-08	1.28e-08
C5	AT2G35530	BZIP16	bZIP	1.36999	3.19e-10	2.57e-09	6.07e-10
C5	AT2G36270	ABI5	bZIP	1.4896	8.45e-14	1.34e-12	3.17e-13
C5	AT2G46270	GBF3	bZIP	1.34065	8.41e-09	4.6e-08	1.09e-08
C5	AT3G10800	BZIP28	bZIP	1.41051	1.12e-10	1e-09	2.37e-10
C5	AT3G56850	DPBF3	bZIP	1.45534	1.23e-13	1.86e-12	4.39e-13
C5	AT4G36730	GBF1	bZIP	1.36509	2.7e-11	2.7e-10	6.38e-11
C5	AT1G03840	MGP	C2H2	1.40229	1.03e-08	5.43e-08	1.28e-08
C5	AT1G14580	AT1G14580	C2H2	1.4128	2.07e-11	2.11e-10	4.98e-11
C5	AT1G55110	IDD7	C2H2	1.36249	2.81e-08	1.39e-07	3.29e-08
C5	AT1G72050	TFIIIA	C2H2	1.23403	2.36e-22	4.86e-20	1.15e-20
C5	AT2G01940	SGR5	C2H2	1.32683	9.65e-09	5.15e-08	1.22e-08
C5	AT2G02070	IDD5	C2H2	1.35655	4.83e-09	2.87e-08	6.79e-09
C5	AT2G02080	IDD4	C2H2	1.38472	1.12e-10	1e-09	2.37e-10
C5	AT3G13810	AtIDD11	C2H2	1.38042	2.57e-09	1.68e-08	3.96e-09
C5	AT3G46070	AT3G46070	C2H2	1.39804	2.17e-09	1.46e-08	3.45e-09
C5	AT3G50700	GAF1	C2H2	1.28343	1.32e-08	6.79e-08	1.6e-08
C5	AT3G60580	ZAT9	C2H2	1.37744	7.06e-12	8.24e-11	1.95e-11
C5	AT5G03150	JKD	C2H2	1.43113	3.65e-11	3.53e-10	8.34e-11
C5	AT5G66730	ENY	C2H2	1.38946	9.66e-10	7.12e-09	1.68e-09
C5	AT3G12130	AT3G12130	C3H	1.28295	1.83e-07	7.83e-07	1.85e-07
C5	AT5G63260	AT5G63260	C3H	1.39137	8.55e-09	4.64e-08	1.1e-08
C5	AT1G51700	DOF1.7	Dof	1.31375	7.19e-09	4.04e-08	9.54e-09
C5	AT1G64620	DOF1.8	Dof	1.31836	4.25e-08	2.07e-07	4.9e-08
C5	AT1G69570	CDF5	Dof	1.3624	2.89e-09	1.87e-08	4.41e-09
C5	AT2G28810	DOF2.2	Dof	1.29213	1.79e-07	7.7e-07	1.82e-07
C5	AT2G46590	DOF2.5	Dof	1.34671	1.54e-08	7.89e-08	1.87e-08
C5	AT3G45610	DOF3.2	Dof	1.30345	2.09e-07	8.67e-07	2.05e-07
C5	AT3G50410	DOF3.4	Dof	1.3215	2.31e-09	1.52e-08	3.59e-09
C5	AT3G52440	AT3G52440	Dof	1.39715	8.3e-09	4.59e-08	1.08e-08
C5	AT3G55370	OBP3	Dof	1.27546	3.86e-09	2.44e-08	5.77e-09
C5	AT4G21030	DOF4.2	Dof	1.34201	4.84e-10	3.79e-09	8.96e-10
C5	AT5G02460	DOF5.1	Dof	1.25904	1.51e-07	6.59e-07	1.56e-07
C5	AT1G22810	ERF019	ERF	1.22383	7.12e-10	5.38e-09	1.27e-09
C5	AT1G44830	ERF014	ERF	1.23564	1.28e-09	9.11e-09	2.15e-09
C5	AT1G71450	ERF021	ERF	1.20309	6.77e-08	3.13e-07	7.4e-08
C5	AT1G74930	ERF018	ERF	1.33439	1.08e-07	4.89e-07	1.16e-07
C5	AT1G75490	DREB2D	ERF	1.20294	4.59e-08	2.22e-07	5.25e-08
C5	AT2G40340	DREB2C	ERF	1.25015	4.32e-12	5.14e-11	1.22e-11
C5	AT3G57600	DREB2F	ERF	1.24476	1.83e-13	2.7e-12	6.38e-13
C5	AT4G18450	ERF091	ERF	1.20166	1.97e-07	8.29e-07	1.96e-07
C5	AT4G27950	CRF4	ERF	1.20485	4.63e-08	2.22e-07	5.25e-08
C5	AT5G18450	DREB2G	ERF	1.21853	9.24e-11	8.53e-10	2.02e-10
C5	AT5G25190	ERF003	ERF	1.25022	1.19e-10	1.04e-09	2.45e-10
C5	AT5G25390	SHN3	ERF	1.21958	1.26e-10	1.07e-09	2.53e-10
C5	AT5G47230	ERF5	ERF	1.19353	4.16e-08	2.05e-07	4.83e-08
C5	AT5G61600	ERF104	ERF	1.20465	2.22e-07	9.18e-07	2.17e-07
C5	AT5G65130	AT5G65130	ERF	1.19828	3.94e-09	2.46e-08	5.82e-09
C5	AT3G12730	PHL12	G2-like	1.51016	2.02e-07	8.44e-07	2e-07
C5	AT3G21175	GATA24	GATA	1.31804	6.99e-09	3.99e-08	9.44e-09
C5	AT3G24050	GATA1	GATA	1.28819	2.97e-12	3.72e-11	8.79e-12
C5	AT4G00270	GEBP	GeBP	1.32961	5.71e-13	8.03e-12	1.9e-12
C5	AT2G01570	RGA	GRAS	1.3209	2.17e-20	1.68e-18	3.97e-19
C5	AT1G69780	ATHB-13	HD-ZIP	1.39287	5.21e-08	2.48e-07	5.86e-08
C5	AT2G22430	ATHB-6	HD-ZIP	1.38621	1.04e-07	4.73e-07	1.12e-07
C5	AT2G46680	ATHB-7	HD-ZIP	1.41356	4.32e-09	2.65e-08	6.26e-09
C5	AT3G01220	ATHB-20	HD-ZIP	1.45595	1.12e-07	5.05e-07	1.19e-07
C5	AT3G61890	ATHB-12	HD-ZIP	1.37914	7.03e-09	3.99e-08	9.44e-09
C5	AT4G17460	HAT1	HD-ZIP	1.48458	2.08e-11	2.11e-10	4.98e-11
C5	AT4G37790	HAT22	HD-ZIP	1.54542	7.52e-14	1.23e-12	2.9e-13
C5	AT4G40060	ATHB-16	HD-ZIP	1.50807	7.54e-10	5.63e-09	1.33e-09
C5	AT5G47370	HAT2	HD-ZIP	1.40975	4.31e-09	2.65e-08	6.26e-09
C5	AT5G65310	ATHB-5	HD-ZIP	1.42237	6.99e-09	3.99e-08	9.44e-09
C5	AT1G77080	MAF1	MIKC_MADS	1.38057	6.54e-08	3.04e-07	7.2e-08
C5	AT2G45660	SOC1	MIKC_MADS	1.26625	3.88e-15	7.5e-14	1.77e-14
C5	AT5G20240	PI	MIKC_MADS	1.31325	1.73e-12	2.28e-11	5.39e-12
C5	AT1G06180	ATMYB13	MYB	1.45207	1.06e-18	5.29e-17	1.25e-17
C5	AT1G08810	MYB60	MYB	1.31709	1.44e-07	6.31e-07	1.49e-07
C5	AT1G09540	MYB61	MYB	1.43806	6.37e-20	4.38e-18	1.04e-18
C5	AT1G16490	MYB58	MYB	1.44002	8.06e-16	2e-14	4.72e-15
C5	AT1G18570	MYB51	MYB	1.40632	1.68e-08	8.52e-08	2.01e-08
C5	AT1G22640	MYB3	MYB	1.57974	1.78e-20	1.57e-18	3.71e-19
C5	AT1G34670	AtMYB93	MYB	1.36766	5.79e-08	2.73e-07	6.46e-08
C5	AT1G74650	ATY13	MYB	1.44769	1.11e-18	5.29e-17	1.25e-17
C5	AT1G79180	ATMYB63	MYB	1.53377	1.44e-20	1.48e-18	3.51e-19
C5	AT2G47460	MYB12	MYB	1.53023	7.98e-16	2e-14	4.72e-15
C5	AT3G08500	MYB83	MYB	1.4089	1.67e-27	1.04e-24	2.45e-25
C5	AT3G12720	ATY53	MYB	1.56366	3.87e-17	1.41e-15	3.33e-16
C5	AT3G12820	AtMYB10	MYB	1.49596	9.01e-19	5.07e-17	1.2e-17
C5	AT3G23250	MYB15	MYB	1.45755	1.32e-16	4.31e-15	1.02e-15
C5	AT3G28910	MYB30	MYB	1.43811	4.23e-19	2.62e-17	6.19e-18
C5	AT3G47600	MYB94	MYB	1.3131	6.13e-08	2.87e-07	6.79e-08
C5	AT3G49690	RAX3	MYB	1.38844	1.94e-21	2.41e-19	5.69e-20
C5	AT3G61250	AtMYB17	MYB	1.43269	1.84e-16	5.68e-15	1.34e-15
C5	AT4G01680	MYB55	MYB	1.42857	5.38e-26	1.66e-23	3.93e-24
C5	AT4G05100	AtMYB74	MYB	1.55743	2.4e-16	6.75e-15	1.6e-15
C5	AT4G17785	MYB39	MYB	1.37885	9.53e-09	5.13e-08	1.21e-08
C5	AT5G10280	MYB92	MYB	1.46978	7.96e-15	1.45e-13	3.42e-14
C5	AT5G12870	MYB46	MYB	1.47232	4.84e-15	9.08e-14	2.15e-14
C5	AT5G14340	AtMYB40	MYB	1.47091	8.61e-16	2.05e-14	4.84e-15
C5	AT5G16600	MYB43	MYB	1.46587	2.58e-15	5.5e-14	1.3e-14
C5	AT5G40330	MYB23	MYB	1.38937	1.28e-10	1.07e-09	2.53e-10
C5	AT5G49330	MYB111	MYB	1.45205	2.15e-16	6.33e-15	1.5e-15
C5	AT5G62320	MYB99	MYB	1.51214	1.82e-21	2.41e-19	5.69e-20
C5	AT5G62470	MYB96	MYB	1.42778	2.67e-15	5.5e-14	1.3e-14
C5	AT1G18960	AT1G18960	MYB_related	1.38094	2.21e-09	1.47e-08	3.47e-09
C5	AT1G34180	anac016	NAC	1.40589	2.08e-08	1.05e-07	2.48e-08
C5	AT1G52890	NAC019	NAC	1.56877	1.17e-10	1.03e-09	2.44e-10
C5	AT1G61110	NAC025	NAC	1.43467	1.84e-09	1.25e-08	2.96e-09
C5	AT1G69490	NAC029	NAC	1.44292	7.24e-08	3.32e-07	7.84e-08
C5	AT1G71930	NAC030	NAC	1.57872	3.11e-12	3.77e-11	8.92e-12
C5	AT5G04410	NAC078	NAC	1.42359	1.27e-16	4.31e-15	1.02e-15
C5	AT3G45150	TCP16	TCP	1.26031	1.86e-07	7.87e-07	1.86e-07
C5	AT4G18390	TCP2	TCP	1.3929	5.07e-09	2.99e-08	7.06e-09
C5	AT2G17950	WUS	WOX	1.49288	2.28e-12	2.95e-11	6.96e-12
C5	AT4G35550	WOX13	WOX	1.45779	1.66e-11	1.74e-10	4.11e-11
C6	AT1G49480	REM19	B3	1.2764	1.46e-09	2.1e-08	1.81e-08
C6	AT1G72050	TFIIIA	C2H2	1.15175	8.84e-09	1.19e-07	1.02e-07
C6	AT1G03800	ERF10	ERF	1.38515	2.77e-15	6.12e-14	5.25e-14
C6	AT1G06160	ERF094	ERF	1.5389	1.08e-28	6.66e-26	5.72e-26
C6	AT1G28160	ERF087	ERF	1.4603	6.32e-20	3.56e-18	3.06e-18
C6	AT1G28360	ERF12	ERF	1.30988	5.67e-16	1.4e-14	1.21e-14
C6	AT1G28370	ERF11	ERF	1.39872	4.53e-17	1.22e-15	1.05e-15
C6	AT1G36060	ERF055	ERF	1.32371	4.18e-09	5.75e-08	4.94e-08
C6	AT1G43160	RAP2-6	ERF	1.43255	3.24e-18	1.06e-16	9.06e-17
C6	AT1G46768	RAP2-1	ERF	1.36703	4e-12	6.87e-11	5.9e-11
C6	AT1G50640	ERF3	ERF	1.42873	3.5e-18	1.08e-16	9.3e-17
C6	AT1G53170	ERF8	ERF	1.4104	7.27e-19	2.81e-17	2.42e-17
C6	AT1G53910	RAP2-12	ERF	1.56176	1.15e-18	4.18e-17	3.59e-17
C6	AT1G68550	ERF118	ERF	1.40176	2.37e-19	9.78e-18	8.39e-18
C6	AT1G72360	HRE1	ERF	1.47393	1.29e-16	3.33e-15	2.86e-15
C6	AT1G75490	DREB2D	ERF	1.2542	1.37e-09	2.02e-08	1.74e-08
C6	AT2G31230	ERF15	ERF	1.41848	8.17e-20	4.22e-18	3.62e-18
C6	AT2G33710	AT2G33710	ERF	1.44819	1.32e-19	5.83e-18	5.01e-18
C6	AT2G40220	ABI4	ERF	1.33629	3.63e-12	6.41e-11	5.51e-11
C6	AT2G44840	ERF13	ERF	1.59351	5.84e-22	5.16e-20	4.43e-20
C6	AT3G15210	ERF4	ERF	1.60523	5.18e-26	8.02e-24	6.89e-24
C6	AT3G16770	RAP2-3	ERF	1.45039	2.28e-22	2.35e-20	2.02e-20
C6	AT3G20310	ERF7	ERF	1.30895	8.44e-12	1.37e-10	1.18e-10
C6	AT3G23220	ERF095	ERF	1.41616	2.17e-20	1.49e-18	1.28e-18
C6	AT3G23240	ERF1B	ERF	1.54253	1.8e-12	3.37e-11	2.89e-11
C6	AT3G57600	DREB2F	ERF	1.24308	5.6e-11	8.88e-10	7.63e-10
C6	AT4G16750	ERF039	ERF	1.3204	2.55e-08	3.29e-07	2.83e-07
C6	AT4G17490	ERF6	ERF	1.39457	6.56e-14	1.35e-12	1.16e-12
C6	AT4G18450	ERF091	ERF	1.44579	7.97e-23	9.87e-21	8.47e-21
C6	AT4G23750	CRF2	ERF	1.60248	1.05e-27	3.25e-25	2.79e-25
C6	AT4G27950	CRF4	ERF	1.25477	1.78e-09	2.51e-08	2.15e-08
C6	AT4G28140	ERF054	ERF	1.27062	3.77e-08	4.76e-07	4.09e-07
C6	AT4G31060	ERF015	ERF	1.38651	5.05e-08	6.12e-07	5.26e-07
C6	AT4G34410	ERF109	ERF	1.68718	9.47e-20	4.51e-18	3.87e-18
C6	AT4G36900	RAP2-10	ERF	1.37082	1.61e-15	3.82e-14	3.28e-14
C6	AT5G07310	ERF115	ERF	1.24132	1.16e-08	1.52e-07	1.31e-07
C6	AT5G13910	LEP	ERF	1.34705	1.01e-12	1.96e-11	1.69e-11
C6	AT5G18450	DREB2G	ERF	1.20534	4.21e-08	5.21e-07	4.47e-07
C6	AT5G18560	ERF086	ERF	1.45841	1.24e-18	4.26e-17	3.66e-17
C6	AT5G19790	RAP2-11	ERF	1.35433	3.36e-12	6.12e-11	5.25e-11
C6	AT5G25190	ERF003	ERF	1.3025	5.1e-12	8.53e-11	7.32e-11
C6	AT5G43410	ERF096	ERF	1.51095	2.29e-27	4.73e-25	4.07e-25
C6	AT5G44210	ERF9	ERF	1.29898	1.39e-10	2.15e-09	1.84e-09
C6	AT5G47220	ERF2	ERF	1.38938	5.37e-15	1.15e-13	9.84e-14
C6	AT5G47230	ERF5	ERF	1.37832	2.06e-20	1.49e-18	1.28e-18
C6	AT5G51190	ERF105	ERF	1.4329	5.01e-20	3.1e-18	2.66e-18
C6	AT5G61600	ERF104	ERF	1.3848	4.35e-17	1.22e-15	1.05e-15
C6	AT5G64750	ABR1	ERF	1.52031	1.92e-17	5.67e-16	4.87e-16
C6	AT5G65130	AT5G65130	ERF	1.28509	1e-13	2e-12	1.72e-12
C6	AT5G67000	ERF122	ERF	1.47547	1.86e-15	4.28e-14	3.67e-14
C6	AT1G72740	AT1G72740	MYB_related	1.5449	5.23e-10	7.9e-09	6.79e-09

## Sheet: Table S13
Table S13. Regulatory relationships reported in Arabidopsis.
TF.wheatID	tf.Cluster	TF.tairID	TF.tairName	Target.wheatID	target.Cluster	Target.tairID	Target.tairName	Info
TraesCS3B02G392600	C4	AT1G07520;AT1G07530;AT2G29060;AT2G29065;AT2G37650;AT3G46600;AT5G59450	AT1G07520;SCL14;SCL33;SCL34;SCL9;SCL30;SCL11	TraesCS6D02G135500	C4	AT2G25180;AT4G31920	ARR12;ARR10	Y1H
TraesCS5B02G494500	C4	AT1G07520;AT1G07530;AT2G29060;AT2G29065;AT2G37650;AT3G46600;AT5G59450	AT1G07520;SCL14;SCL33;SCL34;SCL9;SCL30;SCL11	TraesCS6D02G135500	C4	AT2G25180;AT4G31920	ARR12;ARR10	Y1H
TraesCS1D02G306000	C1	AT2G41070;AT3G56850	EEL;DPBF3	TraesCS7A02G160800	C2	AT1G19220;AT5G20730	ARF19;NPH4	Y1H
TraesCS1D02G306000	C1	AT2G41070;AT3G56850	EEL;DPBF3	TraesCS7D02G161900	C2	AT1G19220;AT5G20730	ARF19;NPH4	Y1H
TraesCS1D02G306000	C1	AT2G41070;AT3G56850	EEL;DPBF3	TraesCS7B02G065800	C3	AT1G19220;AT5G20730	ARF19;NPH4	Y1H
TraesCS5D02G283200	C3	AT2G24430	ANAC038	TraesCS7B02G065800	C3	AT1G19220;AT5G20730	ARF19;NPH4	Y1H
TraesCS5B02G275200	C3	AT2G24430	ANAC038	TraesCS7B02G065800	C3	AT1G19220;AT5G20730	ARF19;NPH4	Y1H
TraesCS5B02G399900	C1	AT1G69310	WRKY57	TraesCS5D02G244800	C5	AT4G36990	HSFB1	Y1H
TraesCS5B02G399900	C1	AT1G69310	WRKY57	TraesCS7B02G065800	C3	AT1G19220;AT5G20730	ARF19;NPH4	Y1H
TraesCS5B02G399900	C1	AT1G69310	WRKY57	TraesCS6D02G135500	C4	AT2G25180;AT4G31920	ARR12;ARR10	Y1H
TraesCS5A02G275900	C3	AT2G24430	ANAC038	TraesCS7B02G065800	C3	AT1G19220;AT5G20730	ARF19;NPH4	Y1H
TraesCS5D02G283200	C3	AT2G24430	ANAC038	TraesCS7A02G160800	C2	AT1G19220;AT5G20730	ARF19;NPH4	Y1H
TraesCS5D02G283200	C3	AT2G24430	ANAC038	TraesCS7D02G161900	C2	AT1G19220;AT5G20730	ARF19;NPH4	Y1H
TraesCSU02G135000	C4	AT3G10480;AT3G10490;AT3G10500;AT5G04410	ANAC050;ANAC052;NAC053;NAC078	TraesCS7A02G160800	C2	AT1G19220;AT5G20730	ARF19;NPH4	Y1H
TraesCSU02G135000	C4	AT3G10480;AT3G10490;AT3G10500;AT5G04410	ANAC050;ANAC052;NAC053;NAC078	TraesCS7D02G161900	C2	AT1G19220;AT5G20730	ARF19;NPH4	Y1H
TraesCS2A02G089300	C1	AT3G22830;AT3G51910;AT3G63350;AT5G43840	HSFA6B;HSFA7A;HSFA7B;HSFA6A	TraesCS5D02G244800	C5	AT4G36990	HSFB1	Y1H
TraesCSU02G135000	C4	AT3G10480;AT3G10490;AT3G10500;AT5G04410	ANAC050;ANAC052;NAC053;NAC078	TraesCS7B02G065800	C3	AT1G19220;AT5G20730	ARF19;NPH4	Y1H
TraesCS6A02G173800	C2	AT2G23290;AT3G50060;AT4G37260;AT5G67300	AtMYB70;MYB77;MYB73;MYB44	TraesCS7B02G065800	C3	AT1G19220;AT5G20730	ARF19;NPH4	Y1H
TraesCS7B02G443900	C2	AT2G23290;AT3G50060;AT4G37260;AT5G67300	AtMYB70;MYB77;MYB73;MYB44	TraesCS7B02G065800	C3	AT1G19220;AT5G20730	ARF19;NPH4	Y1H
TraesCS5D02G317400	C4	AT1G12610;AT1G63030;AT4G25470;AT4G25480;AT4G25490;AT5G51990	DREB1F;DREB1E;DREB1C;DREB1A;DREB1B;DREB1D	TraesCS4D02G332500	C3	AT3G24810;AT5G48820	KRP5;KRP3	Y1H
TraesCS5D02G317400	C4	AT1G12610;AT1G63030;AT4G25470;AT4G25480;AT4G25490;AT5G51990	DREB1F;DREB1E;DREB1C;DREB1A;DREB1B;DREB1D	TraesCS7A02G160800	C2	AT1G19220;AT5G20730	ARF19;NPH4	Y1H
TraesCS5D02G317400	C4	AT1G12610;AT1G63030;AT4G25470;AT4G25480;AT4G25490;AT5G51990	DREB1F;DREB1E;DREB1C;DREB1A;DREB1B;DREB1D	TraesCS7D02G161900	C2	AT1G19220;AT5G20730	ARF19;NPH4	Y1H
TraesCS5D02G317400	C4	AT1G12610;AT1G63030;AT4G25470;AT4G25480;AT4G25490;AT5G51990	DREB1F;DREB1E;DREB1C;DREB1A;DREB1B;DREB1D	TraesCS6B02G174400	C4	AT2G25180;AT4G31920	ARR12;ARR10	Y1H
TraesCS5D02G317400	C4	AT1G12610;AT1G63030;AT4G25470;AT4G25480;AT4G25490;AT5G51990	DREB1F;DREB1E;DREB1C;DREB1A;DREB1B;DREB1D	TraesCS6D02G135500	C4	AT2G25180;AT4G31920	ARR12;ARR10	Y1H
TraesCS5D02G317400	C4	AT1G12610;AT1G63030;AT4G25470;AT4G25480;AT4G25490;AT5G51990	DREB1F;DREB1E;DREB1C;DREB1A;DREB1B;DREB1D	TraesCS1B02G168900	C4	AT3G24810;AT5G48820	KRP5;KRP3	Y1H
TraesCS7A02G526600	C2	AT2G23290;AT3G50060;AT4G37260;AT5G67300	AtMYB70;MYB77;MYB73;MYB44	TraesCS7B02G065800	C3	AT1G19220;AT5G20730	ARF19;NPH4	Y1H
TraesCS3A02G099200	C4	AT3G11020;AT5G05410	DREB2B;DREB2A	TraesCS7A02G160800	C2	AT1G19220;AT5G20730	ARF19;NPH4	Y1H
TraesCS3A02G099200	C4	AT3G11020;AT5G05410	DREB2B;DREB2A	TraesCS7D02G161900	C2	AT1G19220;AT5G20730	ARF19;NPH4	Y1H
TraesCS4A02G128900	C4	AT2G41070;AT3G56850	EEL;DPBF3	TraesCS7A02G160800	C2	AT1G19220;AT5G20730	ARF19;NPH4	Y1H
TraesCS4A02G128900	C4	AT2G41070;AT3G56850	EEL;DPBF3	TraesCS7D02G161900	C2	AT1G19220;AT5G20730	ARF19;NPH4	Y1H
TraesCS4A02G128900	C4	AT2G41070;AT3G56850	EEL;DPBF3	TraesCS7B02G065800	C3	AT1G19220;AT5G20730	ARF19;NPH4	Y1H
TraesCS4B02G175800	C4	AT2G41070;AT3G56850	EEL;DPBF3	TraesCS7A02G160800	C2	AT1G19220;AT5G20730	ARF19;NPH4	Y1H
TraesCS7A02G526500	C1	AT2G23290;AT3G50060;AT4G37260;AT5G67300	AtMYB70;MYB77;MYB73;MYB44	TraesCS4D02G332500	C3	AT3G24810;AT5G48820	KRP5;KRP3	Y1H
TraesCS7A02G526500	C1	AT2G23290;AT3G50060;AT4G37260;AT5G67300	AtMYB70;MYB77;MYB73;MYB44	TraesCS7B02G065800	C3	AT1G19220;AT5G20730	ARF19;NPH4	Y1H
TraesCS7A02G526500	C1	AT2G23290;AT3G50060;AT4G37260;AT5G67300	AtMYB70;MYB77;MYB73;MYB44	TraesCS7D02G182700	C3	AT1G36060	ERF055	Y1H
TraesCS7A02G526500	C1	AT2G23290;AT3G50060;AT4G37260;AT5G67300	AtMYB70;MYB77;MYB73;MYB44	TraesCS5D02G553300	C4	AT1G32330;AT3G02990;AT4G17750;AT5G16820	HSFA1D;HSFA1E;HSFA1A;HSFA1B	Y1H
TraesCS7A02G526500	C1	AT2G23290;AT3G50060;AT4G37260;AT5G67300	AtMYB70;MYB77;MYB73;MYB44	TraesCS1B02G168900	C4	AT3G24810;AT5G48820	KRP5;KRP3	Y1H
TraesCS4B02G175800	C4	AT2G41070;AT3G56850	EEL;DPBF3	TraesCS7D02G161900	C2	AT1G19220;AT5G20730	ARF19;NPH4	Y1H
TraesCS4B02G175800	C4	AT2G41070;AT3G56850	EEL;DPBF3	TraesCS7B02G065800	C3	AT1G19220;AT5G20730	ARF19;NPH4	Y1H
TraesCS5A02G143200	C1	AT1G69490	NAC029	TraesCS5D02G244800	C5	AT4G36990	HSFB1	Y1H
TraesCS2A02G099400	C4	AT2G41070;AT3G56850	EEL;DPBF3	TraesCS7A02G160800	C2	AT1G19220;AT5G20730	ARF19;NPH4	Y1H
TraesCS2A02G099400	C4	AT2G41070;AT3G56850	EEL;DPBF3	TraesCS7D02G161900	C2	AT1G19220;AT5G20730	ARF19;NPH4	Y1H
TraesCS5B02G142100	C1	AT1G69490	NAC029	TraesCS5D02G244800	C5	AT4G36990	HSFB1	Y1H
TraesCS2A02G099400	C4	AT2G41070;AT3G56850	EEL;DPBF3	TraesCS7B02G065800	C3	AT1G19220;AT5G20730	ARF19;NPH4	Y1H
TraesCS2D02G096000	C4	AT2G47190;AT3G06490;AT5G49620	ATMYB2;MYB108;AtMYB78	TraesCS5D02G206200	C4	AT1G70210	CYCD1-1	Y1H
TraesCS2D02G098700	C4	AT2G41070;AT3G56850	EEL;DPBF3	TraesCS7B02G065800	C3	AT1G19220;AT5G20730	ARF19;NPH4	Y1H
TraesCS2B02G115700	C4	AT2G41070;AT3G56850	EEL;DPBF3	TraesCS7B02G065800	C3	AT1G19220;AT5G20730	ARF19;NPH4	Y1H
TraesCS1A02G306300	C4	AT2G41070;AT3G56850	EEL;DPBF3	TraesCS7A02G160800	C2	AT1G19220;AT5G20730	ARF19;NPH4	Y1H
TraesCS1A02G306300	C4	AT2G41070;AT3G56850	EEL;DPBF3	TraesCS7D02G161900	C2	AT1G19220;AT5G20730	ARF19;NPH4	Y1H
TraesCS1A02G306300	C4	AT2G41070;AT3G56850	EEL;DPBF3	TraesCS7B02G065800	C3	AT1G19220;AT5G20730	ARF19;NPH4	Y1H
TraesCS1B02G317100	C1	AT2G41070;AT3G56850	EEL;DPBF3	TraesCS7A02G160800	C2	AT1G19220;AT5G20730	ARF19;NPH4	Y1H
TraesCS1B02G317100	C1	AT2G41070;AT3G56850	EEL;DPBF3	TraesCS7D02G161900	C2	AT1G19220;AT5G20730	ARF19;NPH4	Y1H
TraesCS1B02G317100	C1	AT2G41070;AT3G56850	EEL;DPBF3	TraesCS7B02G065800	C3	AT1G19220;AT5G20730	ARF19;NPH4	Y1H
TraesCS2D02G163700	C1	AT1G74650;AT3G28910;AT3G47600;AT5G62470	ATY13;MYB30;MYB94;MYB96	TraesCS6A02G301900	C5	AT1G36060	ERF055	Y1H
TraesCS2D02G163700	C1	AT1G74650;AT3G28910;AT3G47600;AT5G62470	ATY13;MYB30;MYB94;MYB96	TraesCS7A02G180900	C5	AT1G36060	ERF055	Y1H
TraesCS2D02G163700	C1	AT1G74650;AT3G28910;AT3G47600;AT5G62470	ATY13;MYB30;MYB94;MYB96	TraesCS7D02G182700	C3	AT1G36060	ERF055	Y1H
TraesCS6A02G330500	C4	AT1G21910;AT1G44830;AT1G77640	ERF012;ERF014;ERF013	TraesCS7A02G160800	C2	AT1G19220;AT5G20730	ARF19;NPH4	Y1H
TraesCS6A02G330500	C4	AT1G21910;AT1G44830;AT1G77640	ERF012;ERF014;ERF013	TraesCS7D02G161900	C2	AT1G19220;AT5G20730	ARF19;NPH4	Y1H
TraesCS6D02G309600	C4	AT1G21910;AT1G44830;AT1G77640	ERF012;ERF014;ERF013	TraesCS7A02G160800	C2	AT1G19220;AT5G20730	ARF19;NPH4	Y1H
TraesCS6D02G309600	C4	AT1G21910;AT1G44830;AT1G77640	ERF012;ERF014;ERF013	TraesCS7D02G161900	C2	AT1G19220;AT5G20730	ARF19;NPH4	Y1H
TraesCS7B02G364600	C3	AT1G56010;AT3G12977	NAC021;AT3G12977	TraesCS7B02G065800	C3	AT1G19220;AT5G20730	ARF19;NPH4	Y1H
TraesCS7D02G452500	C3	AT1G56010;AT3G12977	NAC021;AT3G12977	TraesCS7A02G160800	C2	AT1G19220;AT5G20730	ARF19;NPH4	Y1H
TraesCS7D02G452500	C3	AT1G56010;AT3G12977	NAC021;AT3G12977	TraesCS7D02G161900	C2	AT1G19220;AT5G20730	ARF19;NPH4	Y1H
TraesCS7D02G452500	C3	AT1G56010;AT3G12977	NAC021;AT3G12977	TraesCS7B02G065800	C3	AT1G19220;AT5G20730	ARF19;NPH4	Y1H
TraesCS7B02G365300	C3	AT1G56010;AT3G12977	NAC021;AT3G12977	TraesCS7B02G065800	C3	AT1G19220;AT5G20730	ARF19;NPH4	Y1H
TraesCS7D02G451700	C3	AT1G56010;AT3G12977	NAC021;AT3G12977	TraesCS7B02G065800	C3	AT1G19220;AT5G20730	ARF19;NPH4	Y1H
TraesCS7A02G464800	C3	AT1G56010;AT3G12977	NAC021;AT3G12977	TraesCS7B02G065800	C3	AT1G19220;AT5G20730	ARF19;NPH4	Y1H
TraesCS5D02G148900	C6	AT1G76420	NAC031	TraesCS7A02G160800	C2	AT1G19220;AT5G20730	ARF19;NPH4	Y1H
TraesCS5D02G148900	C6	AT1G76420	NAC031	TraesCS7D02G161900	C2	AT1G19220;AT5G20730	ARF19;NPH4	Y1H
TraesCS5A02G143100	C6	AT1G76420	NAC031	TraesCS7A02G160800	C2	AT1G19220;AT5G20730	ARF19;NPH4	Y1H
TraesCS5A02G143100	C6	AT1G76420	NAC031	TraesCS7D02G161900	C2	AT1G19220;AT5G20730	ARF19;NPH4	Y1H
TraesCS2B02G118500	C2	AT1G76420	NAC031	TraesCS7A02G160800	C2	AT1G19220;AT5G20730	ARF19;NPH4	Y1H
TraesCS2B02G118500	C2	AT1G76420	NAC031	TraesCS7D02G161900	C2	AT1G19220;AT5G20730	ARF19;NPH4	Y1H
TraesCS2B02G183100	C1	AT1G74650;AT3G28910;AT3G47600;AT5G62470	ATY13;MYB30;MYB94;MYB96	TraesCS6A02G301900	C5	AT1G36060	ERF055	Y1H
TraesCS2B02G183100	C1	AT1G74650;AT3G28910;AT3G47600;AT5G62470	ATY13;MYB30;MYB94;MYB96	TraesCS7A02G180900	C5	AT1G36060	ERF055	Y1H
TraesCS2B02G183100	C1	AT1G74650;AT3G28910;AT3G47600;AT5G62470	ATY13;MYB30;MYB94;MYB96	TraesCS7D02G182700	C3	AT1G36060	ERF055	Y1H
TraesCS2D02G100900	C3	AT1G76420	NAC031	TraesCS7A02G160800	C2	AT1G19220;AT5G20730	ARF19;NPH4	Y1H
TraesCS2D02G100900	C3	AT1G76420	NAC031	TraesCS7D02G161900	C2	AT1G19220;AT5G20730	ARF19;NPH4	Y1H
TraesCS2A02G101400	C3	AT1G76420	NAC031	TraesCS7A02G160800	C2	AT1G19220;AT5G20730	ARF19;NPH4	Y1H
TraesCS2A02G101400	C3	AT1G76420	NAC031	TraesCS7D02G161900	C2	AT1G19220;AT5G20730	ARF19;NPH4	Y1H
TraesCS2B02G118500	C2	AT1G76420	NAC031	TraesCS7B02G065800	C3	AT1G19220;AT5G20730	ARF19;NPH4	Y1H
TraesCS2A02G101000	C2	AT1G76420	NAC031	TraesCS7A02G160800	C2	AT1G19220;AT5G20730	ARF19;NPH4	Y1H
TraesCS2A02G101000	C2	AT1G76420	NAC031	TraesCS7D02G161900	C2	AT1G19220;AT5G20730	ARF19;NPH4	Y1H
TraesCS4A02G130600	C3	AT1G76420	NAC031	TraesCS7A02G160800	C2	AT1G19220;AT5G20730	ARF19;NPH4	Y1H
TraesCS5A02G310100	C1	AT1G12610;AT1G63030;AT4G25470;AT4G25480;AT4G25490;AT5G51990	DREB1F;DREB1E;DREB1C;DREB1A;DREB1B;DREB1D	TraesCS4D02G332500	C3	AT3G24810;AT5G48820	KRP5;KRP3	Y1H
TraesCS5A02G310100	C1	AT1G12610;AT1G63030;AT4G25470;AT4G25480;AT4G25490;AT5G51990	DREB1F;DREB1E;DREB1C;DREB1A;DREB1B;DREB1D	TraesCS6B02G174400	C4	AT2G25180;AT4G31920	ARR12;ARR10	Y1H
TraesCS5A02G310100	C1	AT1G12610;AT1G63030;AT4G25470;AT4G25480;AT4G25490;AT5G51990	DREB1F;DREB1E;DREB1C;DREB1A;DREB1B;DREB1D	TraesCS6D02G135500	C4	AT2G25180;AT4G31920	ARR12;ARR10	Y1H
TraesCS5A02G310100	C1	AT1G12610;AT1G63030;AT4G25470;AT4G25480;AT4G25490;AT5G51990	DREB1F;DREB1E;DREB1C;DREB1A;DREB1B;DREB1D	TraesCS1B02G168900	C4	AT3G24810;AT5G48820	KRP5;KRP3	Y1H
TraesCS4A02G130600	C3	AT1G76420	NAC031	TraesCS7D02G161900	C2	AT1G19220;AT5G20730	ARF19;NPH4	Y1H
TraesCS2B02G118200	C3	AT1G76420	NAC031	TraesCS7A02G160800	C2	AT1G19220;AT5G20730	ARF19;NPH4	Y1H
TraesCS2B02G118200	C3	AT1G76420	NAC031	TraesCS7D02G161900	C2	AT1G19220;AT5G20730	ARF19;NPH4	Y1H
TraesCS2D02G100900	C3	AT1G76420	NAC031	TraesCS7B02G065800	C3	AT1G19220;AT5G20730	ARF19;NPH4	Y1H
TraesCS2A02G101400	C3	AT1G76420	NAC031	TraesCS7B02G065800	C3	AT1G19220;AT5G20730	ARF19;NPH4	Y1H
TraesCS2A02G157600	C1	AT1G74650;AT3G28910;AT3G47600;AT5G62470	ATY13;MYB30;MYB94;MYB96	TraesCS6A02G301900	C5	AT1G36060	ERF055	Y1H
TraesCS2A02G157600	C1	AT1G74650;AT3G28910;AT3G47600;AT5G62470	ATY13;MYB30;MYB94;MYB96	TraesCS7A02G180900	C5	AT1G36060	ERF055	Y1H
TraesCS2A02G157600	C1	AT1G74650;AT3G28910;AT3G47600;AT5G62470	ATY13;MYB30;MYB94;MYB96	TraesCS7D02G182700	C3	AT1G36060	ERF055	Y1H
TraesCS4A02G130600	C3	AT1G76420	NAC031	TraesCS7B02G065800	C3	AT1G19220;AT5G20730	ARF19;NPH4	Y1H
TraesCS2B02G118200	C3	AT1G76420	NAC031	TraesCS7B02G065800	C3	AT1G19220;AT5G20730	ARF19;NPH4	Y1H
TraesCS2D02G100600	C3	AT1G76420	NAC031	TraesCS7B02G065800	C3	AT1G19220;AT5G20730	ARF19;NPH4	Y1H
TraesCS2A02G101000	C2	AT1G76420	NAC031	TraesCS7B02G065800	C3	AT1G19220;AT5G20730	ARF19;NPH4	Y1H
TraesCS2B02G118400	C3	AT1G76420	NAC031	TraesCS7B02G065800	C3	AT1G19220;AT5G20730	ARF19;NPH4	Y1H
TraesCS2B02G118300	C3	AT1G76420	NAC031	TraesCS7B02G065800	C3	AT1G19220;AT5G20730	ARF19;NPH4	Y1H
TraesCS2D02G100700	C3	AT1G76420	NAC031	TraesCS7B02G065800	C3	AT1G19220;AT5G20730	ARF19;NPH4	Y1H
TraesCS4B02G174000	C3	AT1G76420	NAC031	TraesCS7B02G065800	C3	AT1G19220;AT5G20730	ARF19;NPH4	Y1H
TraesCS4B02G174000	C3	AT1G76420	NAC031	TraesCS7A02G160800	C2	AT1G19220;AT5G20730	ARF19;NPH4	Y1H
TraesCS4B02G174000	C3	AT1G76420	NAC031	TraesCS7D02G161900	C2	AT1G19220;AT5G20730	ARF19;NPH4	Y1H
TraesCS7A02G249100	C4	AT1G20980;AT1G76580	SPL14;AT1G76580	TraesCS7A02G160800	C2	AT1G19220;AT5G20730	ARF19;NPH4	Y1H
TraesCS7A02G249100	C4	AT1G20980;AT1G76580	SPL14;AT1G76580	TraesCS7D02G161900	C2	AT1G19220;AT5G20730	ARF19;NPH4	Y1H
TraesCS2A02G261900	C3	AT1G69310	WRKY57	TraesCS7B02G065800	C3	AT1G19220;AT5G20730	ARF19;NPH4	Y1H
TraesCS2B02G280300	C3	AT1G69310	WRKY57	TraesCS7B02G065800	C3	AT1G19220;AT5G20730	ARF19;NPH4	Y1H
TraesCS2D02G262100	C3	AT1G69310	WRKY57	TraesCS7B02G065800	C3	AT1G19220;AT5G20730	ARF19;NPH4	Y1H
TraesCS5D02G404400	C2	AT1G69310	WRKY57	TraesCS7B02G065800	C3	AT1G19220;AT5G20730	ARF19;NPH4	Y1H
TraesCS5A02G395100	C2	AT1G69310	WRKY57	TraesCS7B02G065800	C3	AT1G19220;AT5G20730	ARF19;NPH4	Y1H
TraesCS2A02G460700	C3	AT2G36080;AT3G11580;AT5G06250	ARF31;AT3G11580;AT5G06250	TraesCS6B02G174400	C4	AT2G25180;AT4G31920	ARR12;ARR10	Y1H
TraesCS2B02G482400	C3	AT2G36080;AT3G11580;AT5G06250	ARF31;AT3G11580;AT5G06250	TraesCS6B02G174400	C4	AT2G25180;AT4G31920	ARR12;ARR10	Y1H
TraesCS4B02G141400	C4	AT1G07520;AT1G07530;AT2G29060;AT2G29065;AT2G37650;AT3G46600;AT5G59450	AT1G07520;SCL14;SCL33;SCL34;SCL9;SCL30;SCL11	TraesCS6D02G135500	C4	AT2G25180;AT4G31920	ARR12;ARR10	Y1H
TraesCS5D02G152700	C4	AT1G07520;AT1G07530;AT2G29060;AT2G29065;AT2G37650;AT3G46600;AT5G59450	AT1G07520;SCL14;SCL33;SCL34;SCL9;SCL30;SCL11	TraesCS6D02G135500	C4	AT2G25180;AT4G31920	ARR12;ARR10	Y1H
TraesCS5A02G481300	C3	AT1G07520;AT1G07530;AT2G29060;AT2G29065;AT2G37650;AT3G46600;AT5G59450	AT1G07520;SCL14;SCL33;SCL34;SCL9;SCL30;SCL11	TraesCS6D02G135500	C4	AT2G25180;AT4G31920	ARR12;ARR10	Y1H
TraesCS5B02G317400	C3	AT2G46680;AT3G61890	ATHB-7;ATHB-12	TraesCS6D02G135500	C4	AT2G25180;AT4G31920	ARR12;ARR10	Y1H
TraesCS5D02G323100	C3	AT2G46680;AT3G61890	ATHB-7;ATHB-12	TraesCS6D02G135500	C4	AT2G25180;AT4G31920	ARR12;ARR10	Y1H
TraesCS4B02G081500	C4	AT1G47655;AT3G50410;AT5G66940	DOF1.6;DOF3.4;DOF5.8	TraesCS6B02G174400	C4	AT2G25180;AT4G31920	ARR12;ARR10	Y1H
TraesCS4B02G081500	C4	AT1G47655;AT3G50410;AT5G66940	DOF1.6;DOF3.4;DOF5.8	TraesCS6D02G135500	C4	AT2G25180;AT4G31920	ARR12;ARR10	Y1H
TraesCS3B02G357500	C1	AT1G53170;AT3G15210;AT5G44210	ERF8;ERF4;ERF9	TraesCS7A02G180900	C5	AT1G36060	ERF055	Y1H
TraesCS3B02G357500	C1	AT1G53170;AT3G15210;AT5G44210	ERF8;ERF4;ERF9	TraesCS4B02G268100	C6	AT1G36060	ERF055	Y1H
TraesCS3B02G357500	C1	AT1G53170;AT3G15210;AT5G44210	ERF8;ERF4;ERF9	TraesCS4A02G035400	C2	AT1G36060	ERF055	Y1H
TraesCS3B02G357500	C1	AT1G53170;AT3G15210;AT5G44210	ERF8;ERF4;ERF9	TraesCS4D02G267500	C6	AT1G36060	ERF055	Y1H
TraesCS3B02G357500	C1	AT1G53170;AT3G15210;AT5G44210	ERF8;ERF4;ERF9	TraesCS7A02G160800	C2	AT1G19220;AT5G20730	ARF19;NPH4	Y1H
TraesCS3B02G357500	C1	AT1G53170;AT3G15210;AT5G44210	ERF8;ERF4;ERF9	TraesCS7D02G161900	C2	AT1G19220;AT5G20730	ARF19;NPH4	Y1H
TraesCS3B02G357500	C1	AT1G53170;AT3G15210;AT5G44210	ERF8;ERF4;ERF9	TraesCS7D02G469200	C4	AT1G36060	ERF055	Y1H
TraesCS3B02G357500	C1	AT1G53170;AT3G15210;AT5G44210	ERF8;ERF4;ERF9	TraesCS7D02G182700	C3	AT1G36060	ERF055	Y1H
TraesCS3B02G357500	C1	AT1G53170;AT3G15210;AT5G44210	ERF8;ERF4;ERF9	TraesCS2B02G122500	C4	AT2G30470;AT4G32010	VAL1;VAL2	Y1H
TraesCS3B02G357500	C1	AT1G53170;AT3G15210;AT5G44210	ERF8;ERF4;ERF9	TraesCS6B02G174400	C4	AT2G25180;AT4G31920	ARR12;ARR10	Y1H
TraesCS3B02G357500	C1	AT1G53170;AT3G15210;AT5G44210	ERF8;ERF4;ERF9	TraesCS6D02G135500	C4	AT2G25180;AT4G31920	ARR12;ARR10	Y1H
TraesCS3B02G357500	C1	AT1G53170;AT3G15210;AT5G44210	ERF8;ERF4;ERF9	TraesCS5D02G243900	C4	AT1G46264	HSFB4	Y1H
TraesCS4A02G234000	C4	AT1G47655;AT3G50410;AT5G66940	DOF1.6;DOF3.4;DOF5.8	TraesCS6B02G174400	C4	AT2G25180;AT4G31920	ARR12;ARR10	Y1H
TraesCS4A02G234000	C4	AT1G47655;AT3G50410;AT5G66940	DOF1.6;DOF3.4;DOF5.8	TraesCS6D02G135500	C4	AT2G25180;AT4G31920	ARR12;ARR10	Y1H
TraesCS3A02G099200	C4	AT3G11020;AT5G05410	DREB2B;DREB2A	TraesCS6B02G174400	C4	AT2G25180;AT4G31920	ARR12;ARR10	Y1H
TraesCS3A02G099200	C4	AT3G11020;AT5G05410	DREB2B;DREB2A	TraesCS6D02G135500	C4	AT2G25180;AT4G31920	ARR12;ARR10	Y1H
TraesCS6B02G361400	C4	AT1G21910;AT1G44830;AT1G77640	ERF012;ERF014;ERF013	TraesCS6B02G174400	C4	AT2G25180;AT4G31920	ARR12;ARR10	Y1H
TraesCS6B02G361400	C4	AT1G21910;AT1G44830;AT1G77640	ERF012;ERF014;ERF013	TraesCS6D02G135500	C4	AT2G25180;AT4G31920	ARR12;ARR10	Y1H
TraesCS6D02G309600	C4	AT1G21910;AT1G44830;AT1G77640	ERF012;ERF014;ERF013	TraesCS6B02G174400	C4	AT2G25180;AT4G31920	ARR12;ARR10	Y1H
TraesCS5A02G310000	C1	AT1G12610;AT1G63030;AT4G25470;AT4G25480;AT4G25490;AT5G51990	DREB1F;DREB1E;DREB1C;DREB1A;DREB1B;DREB1D	TraesCS6B02G174400	C4	AT2G25180;AT4G31920	ARR12;ARR10	Y1H
TraesCS5A02G310000	C1	AT1G12610;AT1G63030;AT4G25470;AT4G25480;AT4G25490;AT5G51990	DREB1F;DREB1E;DREB1C;DREB1A;DREB1B;DREB1D	TraesCS1B02G168900	C4	AT3G24810;AT5G48820	KRP5;KRP3	Y1H
TraesCS6D02G309600	C4	AT1G21910;AT1G44830;AT1G77640	ERF012;ERF014;ERF013	TraesCS6D02G135500	C4	AT2G25180;AT4G31920	ARR12;ARR10	Y1H
TraesCS7D02G182700	C3	AT1G36060	ERF055	TraesCS6B02G174400	C4	AT2G25180;AT4G31920	ARR12;ARR10	review
TraesCS7D02G182700	C3	AT1G36060	ERF055	TraesCS6D02G135500	C4	AT2G25180;AT4G31920	ARR12;ARR10	review
TraesCS7D02G469200	C4	AT1G36060	ERF055	TraesCS6B02G174400	C4	AT2G25180;AT4G31920	ARR12;ARR10	review
TraesCS7D02G469200	C4	AT1G36060	ERF055	TraesCS6D02G135500	C4	AT2G25180;AT4G31920	ARR12;ARR10	review
TraesCS7A02G264100	C4	AT1G43160;AT5G61890	RAP2-6;ERF114	TraesCS6B02G174400	C4	AT2G25180;AT4G31920	ARR12;ARR10	Y1H
TraesCS7A02G264100	C4	AT1G43160;AT5G61890	RAP2-6;ERF114	TraesCS6D02G135500	C4	AT2G25180;AT4G31920	ARR12;ARR10	Y1H
TraesCS7D02G265000	C4	AT1G43160;AT5G61890	RAP2-6;ERF114	TraesCS6B02G174400	C4	AT2G25180;AT4G31920	ARR12;ARR10	Y1H
TraesCS7D02G265000	C4	AT1G43160;AT5G61890	RAP2-6;ERF114	TraesCS6D02G135500	C4	AT2G25180;AT4G31920	ARR12;ARR10	Y1H
TraesCS2A02G261900	C3	AT1G69310	WRKY57	TraesCS6D02G135500	C4	AT2G25180;AT4G31920	ARR12;ARR10	Y1H
TraesCS2B02G280300	C3	AT1G69310	WRKY57	TraesCS6D02G135500	C4	AT2G25180;AT4G31920	ARR12;ARR10	Y1H
TraesCS2D02G262100	C3	AT1G69310	WRKY57	TraesCS6D02G135500	C4	AT2G25180;AT4G31920	ARR12;ARR10	Y1H
TraesCS5D02G404400	C2	AT1G69310	WRKY57	TraesCS6D02G135500	C4	AT2G25180;AT4G31920	ARR12;ARR10	Y1H
TraesCS5A02G395100	C2	AT1G69310	WRKY57	TraesCS6D02G135500	C4	AT2G25180;AT4G31920	ARR12;ARR10	Y1H
TraesCSU02G069000	C3	AT2G47190;AT3G06490;AT5G49620	ATMYB2;MYB108;AtMYB78	TraesCS5D02G206200	C4	AT1G70210	CYCD1-1	Y1H
TraesCS2B02G112600	C4	AT2G47190;AT3G06490;AT5G49620	ATMYB2;MYB108;AtMYB78	TraesCS5D02G206200	C4	AT1G70210	CYCD1-1	Y1H
TraesCS2A02G097200	C4	AT2G47190;AT3G06490;AT5G49620	ATMYB2;MYB108;AtMYB78	TraesCS5D02G206200	C4	AT1G70210	CYCD1-1	Y1H
TraesCS6A02G235100	C1	AT2G20880;AT2G46310;AT4G28140	ERF053;CRF5;ERF054	TraesCS2A02G590800	C1	AT1G47655;AT3G50410;AT5G66940	DOF1.6;DOF3.4;DOF5.8	Y1H
TraesCS6A02G235100	C1	AT2G20880;AT2G46310;AT4G28140	ERF053;CRF5;ERF054	TraesCS2B02G592900	C1	AT1G47655;AT3G50410;AT5G66940	DOF1.6;DOF3.4;DOF5.8	Y1H
TraesCS6A02G235100	C1	AT2G20880;AT2G46310;AT4G28140	ERF053;CRF5;ERF054	TraesCS2A02G590700	C1	AT1G47655;AT3G50410;AT5G66940	DOF1.6;DOF3.4;DOF5.8	Y1H
TraesCS6A02G235100	C1	AT2G20880;AT2G46310;AT4G28140	ERF053;CRF5;ERF054	TraesCS2D02G563400	C1	AT1G47655;AT3G50410;AT5G66940	DOF1.6;DOF3.4;DOF5.8	Y1H
TraesCS6A02G235100	C1	AT2G20880;AT2G46310;AT4G28140	ERF053;CRF5;ERF054	TraesCS2B02G592700	C1	AT1G47655;AT3G50410;AT5G66940	DOF1.6;DOF3.4;DOF5.8	Y1H
TraesCS6A02G235100	C1	AT2G20880;AT2G46310;AT4G28140	ERF053;CRF5;ERF054	TraesCS2D02G563200	C1	AT1G47655;AT3G50410;AT5G66940	DOF1.6;DOF3.4;DOF5.8	Y1H
TraesCS6A02G235100	C1	AT2G20880;AT2G46310;AT4G28140	ERF053;CRF5;ERF054	TraesCS2A02G591000	C5	AT1G47655;AT3G50410;AT5G66940	DOF1.6;DOF3.4;DOF5.8	Y1H
TraesCS6A02G235100	C1	AT2G20880;AT2G46310;AT4G28140	ERF053;CRF5;ERF054	TraesCS2D02G563000	C5	AT1G47655;AT3G50410;AT5G66940	DOF1.6;DOF3.4;DOF5.8	Y1H
TraesCS6A02G235100	C1	AT2G20880;AT2G46310;AT4G28140	ERF053;CRF5;ERF054	TraesCS2A02G591100	C5	AT1G47655;AT3G50410;AT5G66940	DOF1.6;DOF3.4;DOF5.8	Y1H
TraesCS6A02G235100	C1	AT2G20880;AT2G46310;AT4G28140	ERF053;CRF5;ERF054	TraesCS2D02G563100	C5	AT1G47655;AT3G50410;AT5G66940	DOF1.6;DOF3.4;DOF5.8	Y1H
TraesCS6A02G235100	C1	AT2G20880;AT2G46310;AT4G28140	ERF053;CRF5;ERF054	TraesCS2A02G591200	C5	AT1G47655;AT3G50410;AT5G66940	DOF1.6;DOF3.4;DOF5.8	Y1H
TraesCS6A02G235100	C1	AT2G20880;AT2G46310;AT4G28140	ERF053;CRF5;ERF054	TraesCS2B02G592600	C5	AT1G47655;AT3G50410;AT5G66940	DOF1.6;DOF3.4;DOF5.8	Y1H
TraesCS6A02G235100	C1	AT2G20880;AT2G46310;AT4G28140	ERF053;CRF5;ERF054	TraesCS5A02G251800	C5	AT1G47655;AT3G50410;AT5G66940	DOF1.6;DOF3.4;DOF5.8	Y1H
TraesCS6D02G217800	C2	AT2G20880;AT2G46310;AT4G28140	ERF053;CRF5;ERF054	TraesCS2A02G590800	C1	AT1G47655;AT3G50410;AT5G66940	DOF1.6;DOF3.4;DOF5.8	Y1H
TraesCS6D02G217800	C2	AT2G20880;AT2G46310;AT4G28140	ERF053;CRF5;ERF054	TraesCS2B02G592900	C1	AT1G47655;AT3G50410;AT5G66940	DOF1.6;DOF3.4;DOF5.8	Y1H
TraesCS6D02G217800	C2	AT2G20880;AT2G46310;AT4G28140	ERF053;CRF5;ERF054	TraesCS2A02G590700	C1	AT1G47655;AT3G50410;AT5G66940	DOF1.6;DOF3.4;DOF5.8	Y1H
TraesCS6D02G217800	C2	AT2G20880;AT2G46310;AT4G28140	ERF053;CRF5;ERF054	TraesCS2D02G563400	C1	AT1G47655;AT3G50410;AT5G66940	DOF1.6;DOF3.4;DOF5.8	Y1H
TraesCS6D02G217800	C2	AT2G20880;AT2G46310;AT4G28140	ERF053;CRF5;ERF054	TraesCS2B02G592700	C1	AT1G47655;AT3G50410;AT5G66940	DOF1.6;DOF3.4;DOF5.8	Y1H
TraesCS6D02G217800	C2	AT2G20880;AT2G46310;AT4G28140	ERF053;CRF5;ERF054	TraesCS2D02G563200	C1	AT1G47655;AT3G50410;AT5G66940	DOF1.6;DOF3.4;DOF5.8	Y1H
TraesCS6B02G263800	C2	AT2G20880;AT2G46310;AT4G28140	ERF053;CRF5;ERF054	TraesCS2A02G590800	C1	AT1G47655;AT3G50410;AT5G66940	DOF1.6;DOF3.4;DOF5.8	Y1H
TraesCS6B02G263800	C2	AT2G20880;AT2G46310;AT4G28140	ERF053;CRF5;ERF054	TraesCS2B02G592900	C1	AT1G47655;AT3G50410;AT5G66940	DOF1.6;DOF3.4;DOF5.8	Y1H
TraesCS6B02G263800	C2	AT2G20880;AT2G46310;AT4G28140	ERF053;CRF5;ERF054	TraesCS2A02G590700	C1	AT1G47655;AT3G50410;AT5G66940	DOF1.6;DOF3.4;DOF5.8	Y1H
TraesCS6B02G263800	C2	AT2G20880;AT2G46310;AT4G28140	ERF053;CRF5;ERF054	TraesCS2D02G563400	C1	AT1G47655;AT3G50410;AT5G66940	DOF1.6;DOF3.4;DOF5.8	Y1H
TraesCS6B02G263800	C2	AT2G20880;AT2G46310;AT4G28140	ERF053;CRF5;ERF054	TraesCS2B02G592700	C1	AT1G47655;AT3G50410;AT5G66940	DOF1.6;DOF3.4;DOF5.8	Y1H
TraesCS1B02G326600	C1	AT1G53170;AT3G15210;AT5G44210	ERF8;ERF4;ERF9	TraesCS7A02G180900	C5	AT1G36060	ERF055	Y1H
TraesCS1B02G326600	C1	AT1G53170;AT3G15210;AT5G44210	ERF8;ERF4;ERF9	TraesCS4B02G268100	C6	AT1G36060	ERF055	Y1H
TraesCS1B02G326600	C1	AT1G53170;AT3G15210;AT5G44210	ERF8;ERF4;ERF9	TraesCS4A02G035400	C2	AT1G36060	ERF055	Y1H
TraesCS1B02G326600	C1	AT1G53170;AT3G15210;AT5G44210	ERF8;ERF4;ERF9	TraesCS4D02G267500	C6	AT1G36060	ERF055	Y1H
TraesCS1B02G326600	C1	AT1G53170;AT3G15210;AT5G44210	ERF8;ERF4;ERF9	TraesCS7A02G160800	C2	AT1G19220;AT5G20730	ARF19;NPH4	Y1H
TraesCS1B02G326600	C1	AT1G53170;AT3G15210;AT5G44210	ERF8;ERF4;ERF9	TraesCS7D02G161900	C2	AT1G19220;AT5G20730	ARF19;NPH4	Y1H
TraesCS1B02G326600	C1	AT1G53170;AT3G15210;AT5G44210	ERF8;ERF4;ERF9	TraesCS7D02G469200	C4	AT1G36060	ERF055	Y1H
TraesCS1B02G326600	C1	AT1G53170;AT3G15210;AT5G44210	ERF8;ERF4;ERF9	TraesCS7D02G182700	C3	AT1G36060	ERF055	Y1H
TraesCS1B02G326600	C1	AT1G53170;AT3G15210;AT5G44210	ERF8;ERF4;ERF9	TraesCS2B02G122500	C4	AT2G30470;AT4G32010	VAL1;VAL2	Y1H
TraesCS1B02G326600	C1	AT1G53170;AT3G15210;AT5G44210	ERF8;ERF4;ERF9	TraesCS6B02G174400	C4	AT2G25180;AT4G31920	ARR12;ARR10	Y1H
TraesCS1B02G326600	C1	AT1G53170;AT3G15210;AT5G44210	ERF8;ERF4;ERF9	TraesCS6D02G135500	C4	AT2G25180;AT4G31920	ARR12;ARR10	Y1H
TraesCS1B02G326600	C1	AT1G53170;AT3G15210;AT5G44210	ERF8;ERF4;ERF9	TraesCS5D02G243900	C4	AT1G46264	HSFB4	Y1H
TraesCS6B02G263800	C2	AT2G20880;AT2G46310;AT4G28140	ERF053;CRF5;ERF054	TraesCS2D02G563200	C1	AT1G47655;AT3G50410;AT5G66940	DOF1.6;DOF3.4;DOF5.8	Y1H
TraesCS6B02G263800	C2	AT2G20880;AT2G46310;AT4G28140	ERF053;CRF5;ERF054	TraesCS2A02G591000	C5	AT1G47655;AT3G50410;AT5G66940	DOF1.6;DOF3.4;DOF5.8	Y1H
TraesCS3D02G354100	C1	AT1G07520;AT1G07530;AT2G29060;AT2G29065;AT2G37650;AT3G46600;AT5G59450	AT1G07520;SCL14;SCL33;SCL34;SCL9;SCL30;SCL11	TraesCS6D02G135500	C4	AT2G25180;AT4G31920	ARR12;ARR10	Y1H
TraesCS6B02G263800	C2	AT2G20880;AT2G46310;AT4G28140	ERF053;CRF5;ERF054	TraesCS2D02G563000	C5	AT1G47655;AT3G50410;AT5G66940	DOF1.6;DOF3.4;DOF5.8	Y1H
TraesCS6B02G263800	C2	AT2G20880;AT2G46310;AT4G28140	ERF053;CRF5;ERF054	TraesCS2A02G591100	C5	AT1G47655;AT3G50410;AT5G66940	DOF1.6;DOF3.4;DOF5.8	Y1H
TraesCS6B02G263800	C2	AT2G20880;AT2G46310;AT4G28140	ERF053;CRF5;ERF054	TraesCS2D02G563100	C5	AT1G47655;AT3G50410;AT5G66940	DOF1.6;DOF3.4;DOF5.8	Y1H
TraesCS6B02G263800	C2	AT2G20880;AT2G46310;AT4G28140	ERF053;CRF5;ERF054	TraesCS2A02G591200	C5	AT1G47655;AT3G50410;AT5G66940	DOF1.6;DOF3.4;DOF5.8	Y1H
TraesCS6B02G263800	C2	AT2G20880;AT2G46310;AT4G28140	ERF053;CRF5;ERF054	TraesCS2B02G592600	C5	AT1G47655;AT3G50410;AT5G66940	DOF1.6;DOF3.4;DOF5.8	Y1H
TraesCS6B02G263800	C2	AT2G20880;AT2G46310;AT4G28140	ERF053;CRF5;ERF054	TraesCS5A02G251800	C5	AT1G47655;AT3G50410;AT5G66940	DOF1.6;DOF3.4;DOF5.8	Y1H
TraesCS4A02G415400	C6	AT2G42440;AT3G58190	LBD17;LBD29	TraesCS2D02G563000	C5	AT1G47655;AT3G50410;AT5G66940	DOF1.6;DOF3.4;DOF5.8	Y1H
TraesCS4A02G415400	C6	AT2G42440;AT3G58190	LBD17;LBD29	TraesCS2D02G563100	C5	AT1G47655;AT3G50410;AT5G66940	DOF1.6;DOF3.4;DOF5.8	Y1H
TraesCS4A02G415400	C6	AT2G42440;AT3G58190	LBD17;LBD29	TraesCS2B02G592600	C5	AT1G47655;AT3G50410;AT5G66940	DOF1.6;DOF3.4;DOF5.8	Y1H
TraesCS4B02G316200	C3	AT2G42440;AT3G58190	LBD17;LBD29	TraesCS2D02G563000	C5	AT1G47655;AT3G50410;AT5G66940	DOF1.6;DOF3.4;DOF5.8	Y1H
TraesCS4B02G316200	C3	AT2G42440;AT3G58190	LBD17;LBD29	TraesCS2D02G563100	C5	AT1G47655;AT3G50410;AT5G66940	DOF1.6;DOF3.4;DOF5.8	Y1H
TraesCS4B02G316200	C3	AT2G42440;AT3G58190	LBD17;LBD29	TraesCS2B02G592600	C5	AT1G47655;AT3G50410;AT5G66940	DOF1.6;DOF3.4;DOF5.8	Y1H
TraesCS1D02G113100	C3	AT2G30340	LBD13	TraesCS6D02G182600	C2	AT2G36010;AT5G22220	E2F3;E2FB	Y1H
TraesCS1A02G111700	C3	AT2G30340	LBD13	TraesCS6D02G182600	C2	AT2G36010;AT5G22220	E2F3;E2FB	Y1H
TraesCS1B02G131900	C3	AT2G30340	LBD13	TraesCS6D02G182600	C2	AT2G36010;AT5G22220	E2F3;E2FB	Y1H
TraesCS1A02G266300	C6	AT5G09330;AT5G64060	NAC082;anac103	TraesCS2D02G295300	C6	AT2G36010;AT5G22220	E2F3;E2FB	Y1H
TraesCS1A02G266300	C6	AT5G09330;AT5G64060	NAC082;anac103	TraesCS6B02G233700	C6	AT2G36010;AT5G22220	E2F3;E2FB	Y1H
TraesCS1B02G277300	C6	AT5G09330;AT5G64060	NAC082;anac103	TraesCS2D02G295300	C6	AT2G36010;AT5G22220	E2F3;E2FB	Y1H
TraesCS1B02G277300	C6	AT5G09330;AT5G64060	NAC082;anac103	TraesCS6B02G233700	C6	AT2G36010;AT5G22220	E2F3;E2FB	Y1H
TraesCSU02G137200	C6	AT5G09330;AT5G64060	NAC082;anac103	TraesCS2D02G295300	C6	AT2G36010;AT5G22220	E2F3;E2FB	Y1H
TraesCS6A02G235100	C1	AT2G20880;AT2G46310;AT4G28140	ERF053;CRF5;ERF054	TraesCS7A02G180900	C5	AT1G36060	ERF055	Y1H
TraesCS6A02G235100	C1	AT2G20880;AT2G46310;AT4G28140	ERF053;CRF5;ERF054	TraesCS4B02G268100	C6	AT1G36060	ERF055	Y1H
TraesCS6A02G235100	C1	AT2G20880;AT2G46310;AT4G28140	ERF053;CRF5;ERF054	TraesCS4A02G035400	C2	AT1G36060	ERF055	Y1H
TraesCS6A02G235100	C1	AT2G20880;AT2G46310;AT4G28140	ERF053;CRF5;ERF054	TraesCS4D02G267500	C6	AT1G36060	ERF055	Y1H
TraesCS6A02G235100	C1	AT2G20880;AT2G46310;AT4G28140	ERF053;CRF5;ERF054	TraesCS7D02G469200	C4	AT1G36060	ERF055	Y1H
TraesCS6A02G235100	C1	AT2G20880;AT2G46310;AT4G28140	ERF053;CRF5;ERF054	TraesCS7D02G182700	C3	AT1G36060	ERF055	Y1H
TraesCSU02G137200	C6	AT5G09330;AT5G64060	NAC082;anac103	TraesCS6B02G233700	C6	AT2G36010;AT5G22220	E2F3;E2FB	Y1H
TraesCS1D02G266500	C6	AT5G09330;AT5G64060	NAC082;anac103	TraesCS2D02G295300	C6	AT2G36010;AT5G22220	E2F3;E2FB	Y1H
TraesCS1D02G266500	C6	AT5G09330;AT5G64060	NAC082;anac103	TraesCS6B02G233700	C6	AT2G36010;AT5G22220	E2F3;E2FB	Y1H
TraesCS6A02G003800	C4	AT5G09330;AT5G64060	NAC082;anac103	TraesCS2D02G295300	C6	AT2G36010;AT5G22220	E2F3;E2FB	Y1H
TraesCS6A02G003800	C4	AT5G09330;AT5G64060	NAC082;anac103	TraesCS6B02G233700	C6	AT2G36010;AT5G22220	E2F3;E2FB	Y1H
TraesCS3A02G371800	C1	AT2G36270	ABI5	TraesCS6D02G281200	C6	AT1G36060	ERF055	Y1H
TraesCS3D02G364900	C5	AT2G36270	ABI5	TraesCS6D02G281200	C6	AT1G36060	ERF055	Y1H
TraesCS3D02G364900	C5	AT2G36270	ABI5	TraesCS7A02G180900	C5	AT1G36060	ERF055	Y1H
TraesCS3B02G404600	C5	AT2G36270	ABI5	TraesCS6D02G281200	C6	AT1G36060	ERF055	Y1H
TraesCS3B02G404600	C5	AT2G36270	ABI5	TraesCS7A02G180900	C5	AT1G36060	ERF055	Y1H
TraesCS3B02G404600	C5	AT2G36270	ABI5	TraesCS4D02G267500	C6	AT1G36060	ERF055	Y1H
TraesCS3B02G404300	C2	AT2G36270	ABI5	TraesCS6D02G281200	C6	AT1G36060	ERF055	Y1H
TraesCS3B02G404300	C2	AT2G36270	ABI5	TraesCS7A02G180900	C5	AT1G36060	ERF055	Y1H
TraesCS3B02G404300	C2	AT2G36270	ABI5	TraesCS4D02G267500	C6	AT1G36060	ERF055	Y1H
TraesCS5D02G283200	C3	AT2G24430	ANAC038	TraesCS7D02G469200	C4	AT1G36060	ERF055	Y1H
TraesCS3A02G328000	C1	AT1G53170;AT3G15210;AT5G44210	ERF8;ERF4;ERF9	TraesCS7A02G180900	C5	AT1G36060	ERF055	Y1H
TraesCS3A02G328000	C1	AT1G53170;AT3G15210;AT5G44210	ERF8;ERF4;ERF9	TraesCS4B02G268100	C6	AT1G36060	ERF055	Y1H
TraesCS3A02G328000	C1	AT1G53170;AT3G15210;AT5G44210	ERF8;ERF4;ERF9	TraesCS4A02G035400	C2	AT1G36060	ERF055	Y1H
TraesCS3A02G328000	C1	AT1G53170;AT3G15210;AT5G44210	ERF8;ERF4;ERF9	TraesCS4D02G267500	C6	AT1G36060	ERF055	Y1H
TraesCS3A02G328000	C1	AT1G53170;AT3G15210;AT5G44210	ERF8;ERF4;ERF9	TraesCS7A02G160800	C2	AT1G19220;AT5G20730	ARF19;NPH4	Y1H
TraesCS3A02G328000	C1	AT1G53170;AT3G15210;AT5G44210	ERF8;ERF4;ERF9	TraesCS7D02G161900	C2	AT1G19220;AT5G20730	ARF19;NPH4	Y1H
TraesCS3A02G328000	C1	AT1G53170;AT3G15210;AT5G44210	ERF8;ERF4;ERF9	TraesCS7D02G469200	C4	AT1G36060	ERF055	Y1H
TraesCS3A02G328000	C1	AT1G53170;AT3G15210;AT5G44210	ERF8;ERF4;ERF9	TraesCS7D02G182700	C3	AT1G36060	ERF055	Y1H
TraesCS3A02G328000	C1	AT1G53170;AT3G15210;AT5G44210	ERF8;ERF4;ERF9	TraesCS2B02G122500	C4	AT2G30470;AT4G32010	VAL1;VAL2	Y1H
TraesCS3A02G328000	C1	AT1G53170;AT3G15210;AT5G44210	ERF8;ERF4;ERF9	TraesCS6B02G174400	C4	AT2G25180;AT4G31920	ARR12;ARR10	Y1H
TraesCS3A02G328000	C1	AT1G53170;AT3G15210;AT5G44210	ERF8;ERF4;ERF9	TraesCS6D02G135500	C4	AT2G25180;AT4G31920	ARR12;ARR10	Y1H
TraesCS3A02G328000	C1	AT1G53170;AT3G15210;AT5G44210	ERF8;ERF4;ERF9	TraesCS5D02G243900	C4	AT1G46264	HSFB4	Y1H
TraesCS5D02G283200	C3	AT2G24430	ANAC038	TraesCS7D02G182700	C3	AT1G36060	ERF055	Y1H
TraesCS5B02G275200	C3	AT2G24430	ANAC038	TraesCS7D02G182700	C3	AT1G36060	ERF055	Y1H
TraesCS5A02G275900	C3	AT2G24430	ANAC038	TraesCS7D02G469200	C4	AT1G36060	ERF055	Y1H
TraesCS5A02G275900	C3	AT2G24430	ANAC038	TraesCS7D02G182700	C3	AT1G36060	ERF055	Y1H
TraesCSU02G135000	C4	AT3G10480;AT3G10490;AT3G10500;AT5G04410	ANAC050;ANAC052;NAC053;NAC078	TraesCS7A02G180900	C5	AT1G36060	ERF055	Y1H
TraesCSU02G135000	C4	AT3G10480;AT3G10490;AT3G10500;AT5G04410	ANAC050;ANAC052;NAC053;NAC078	TraesCS4D02G267500	C6	AT1G36060	ERF055	Y1H
TraesCSU02G135000	C4	AT3G10480;AT3G10490;AT3G10500;AT5G04410	ANAC050;ANAC052;NAC053;NAC078	TraesCS7D02G469200	C4	AT1G36060	ERF055	Y1H
TraesCSU02G135000	C4	AT3G10480;AT3G10490;AT3G10500;AT5G04410	ANAC050;ANAC052;NAC053;NAC078	TraesCS7D02G182700	C3	AT1G36060	ERF055	Y1H
TraesCS4B02G261600	C4	AT2G18550;AT4G36740;AT5G66700	ATHB-21;HB-5;ATHB-53	TraesCS6D02G281200	C6	AT1G36060	ERF055	Y1H
TraesCS3B02G278000	C1	AT1G28300;AT3G26790	LEC2;FUS3	TraesCS5D02G133600	C6	AT2G36010;AT5G22220	E2F3;E2FB	Y1H
TraesCS3B02G278000	C1	AT1G28300;AT3G26790	LEC2;FUS3	TraesCS6B02G233700	C6	AT2G36010;AT5G22220	E2F3;E2FB	Y1H
TraesCS3B02G278000	C1	AT1G28300;AT3G26790	LEC2;FUS3	TraesCS2D02G357600	C4	AT5G17430	BBM	review
TraesCS3B02G278000	C1	AT1G28300;AT3G26790	LEC2;FUS3	TraesCS6A02G229500	C4	AT5G17430	BBM	review
TraesCS3B02G278000	C1	AT1G28300;AT3G26790	LEC2;FUS3	TraesCS6D02G205300	C4	AT5G17430	BBM	review
TraesCS3B02G278000	C1	AT1G28300;AT3G26790	LEC2;FUS3	TraesCS1A02G052000	C4	AT2G28610	WOX3	Y1H
TraesCS3B02G278000	C1	AT1G28300;AT3G26790	LEC2;FUS3	TraesCS1D02G054000	C4	AT2G28610	WOX3	Y1H
TraesCS3B02G278000	C1	AT1G28300;AT3G26790	LEC2;FUS3	TraesCS1B02G069000	C4	AT2G28610	WOX3	Y1H
TraesCS4B02G261600	C4	AT2G18550;AT4G36740;AT5G66700	ATHB-21;HB-5;ATHB-53	TraesCS6A02G301900	C5	AT1G36060	ERF055	Y1H
TraesCS4D02G261600	C4	AT2G18550;AT4G36740;AT5G66700	ATHB-21;HB-5;ATHB-53	TraesCS6D02G281200	C6	AT1G36060	ERF055	Y1H
TraesCS4D02G261600	C4	AT2G18550;AT4G36740;AT5G66700	ATHB-21;HB-5;ATHB-53	TraesCS6A02G301900	C5	AT1G36060	ERF055	Y1H
TraesCS6B02G201700	C2	AT2G23290;AT3G50060;AT4G37260;AT5G67300	AtMYB70;MYB77;MYB73;MYB44	TraesCS6B02G331000	C5	AT1G36060	ERF055	Y1H
TraesCS6B02G201700	C2	AT2G23290;AT3G50060;AT4G37260;AT5G67300	AtMYB70;MYB77;MYB73;MYB44	TraesCS6A02G301900	C5	AT1G36060	ERF055	Y1H
TraesCS6B02G201700	C2	AT2G23290;AT3G50060;AT4G37260;AT5G67300	AtMYB70;MYB77;MYB73;MYB44	TraesCS7A02G180900	C5	AT1G36060	ERF055	Y1H
TraesCS6B02G201700	C2	AT2G23290;AT3G50060;AT4G37260;AT5G67300	AtMYB70;MYB77;MYB73;MYB44	TraesCS6D02G281200	C6	AT1G36060	ERF055	Y1H
TraesCS6D02G162900	C2	AT2G23290;AT3G50060;AT4G37260;AT5G67300	AtMYB70;MYB77;MYB73;MYB44	TraesCS6D02G281200	C6	AT1G36060	ERF055	Y1H
TraesCS6D02G162900	C2	AT2G23290;AT3G50060;AT4G37260;AT5G67300	AtMYB70;MYB77;MYB73;MYB44	TraesCS6B02G331000	C5	AT1G36060	ERF055	Y1H
TraesCS5B02G310800	C1	AT1G12610;AT1G63030;AT4G25470;AT4G25480;AT4G25490;AT5G51990	DREB1F;DREB1E;DREB1C;DREB1A;DREB1B;DREB1D	TraesCS4D02G332500	C3	AT3G24810;AT5G48820	KRP5;KRP3	Y1H
TraesCS5B02G310800	C1	AT1G12610;AT1G63030;AT4G25470;AT4G25480;AT4G25490;AT5G51990	DREB1F;DREB1E;DREB1C;DREB1A;DREB1B;DREB1D	TraesCS6B02G174400	C4	AT2G25180;AT4G31920	ARR12;ARR10	Y1H
TraesCS5B02G310800	C1	AT1G12610;AT1G63030;AT4G25470;AT4G25480;AT4G25490;AT5G51990	DREB1F;DREB1E;DREB1C;DREB1A;DREB1B;DREB1D	TraesCS6D02G135500	C4	AT2G25180;AT4G31920	ARR12;ARR10	Y1H
TraesCS5B02G310800	C1	AT1G12610;AT1G63030;AT4G25470;AT4G25480;AT4G25490;AT5G51990	DREB1F;DREB1E;DREB1C;DREB1A;DREB1B;DREB1D	TraesCS1B02G168900	C4	AT3G24810;AT5G48820	KRP5;KRP3	Y1H
TraesCS6D02G162900	C2	AT2G23290;AT3G50060;AT4G37260;AT5G67300	AtMYB70;MYB77;MYB73;MYB44	TraesCS6A02G301900	C5	AT1G36060	ERF055	Y1H
TraesCS6D02G162900	C2	AT2G23290;AT3G50060;AT4G37260;AT5G67300	AtMYB70;MYB77;MYB73;MYB44	TraesCS7A02G180900	C5	AT1G36060	ERF055	Y1H
TraesCS6A02G173800	C2	AT2G23290;AT3G50060;AT4G37260;AT5G67300	AtMYB70;MYB77;MYB73;MYB44	TraesCS6D02G281200	C6	AT1G36060	ERF055	Y1H
TraesCS7B02G443900	C2	AT2G23290;AT3G50060;AT4G37260;AT5G67300	AtMYB70;MYB77;MYB73;MYB44	TraesCS7D02G182700	C3	AT1G36060	ERF055	Y1H
TraesCS6A02G173800	C2	AT2G23290;AT3G50060;AT4G37260;AT5G67300	AtMYB70;MYB77;MYB73;MYB44	TraesCS6B02G331000	C5	AT1G36060	ERF055	Y1H
TraesCS6A02G173800	C2	AT2G23290;AT3G50060;AT4G37260;AT5G67300	AtMYB70;MYB77;MYB73;MYB44	TraesCS6A02G301900	C5	AT1G36060	ERF055	Y1H
TraesCS6A02G173800	C2	AT2G23290;AT3G50060;AT4G37260;AT5G67300	AtMYB70;MYB77;MYB73;MYB44	TraesCS7A02G180900	C5	AT1G36060	ERF055	Y1H
TraesCS7A02G526600	C2	AT2G23290;AT3G50060;AT4G37260;AT5G67300	AtMYB70;MYB77;MYB73;MYB44	TraesCS7D02G182700	C3	AT1G36060	ERF055	Y1H
TraesCS2D02G163700	C1	AT1G74650;AT3G28910;AT3G47600;AT5G62470	ATY13;MYB30;MYB94;MYB96	TraesCS6D02G281200	C6	AT1G36060	ERF055	Y1H
TraesCS2D02G163700	C1	AT1G74650;AT3G28910;AT3G47600;AT5G62470	ATY13;MYB30;MYB94;MYB96	TraesCS6B02G331000	C5	AT1G36060	ERF055	Y1H
TraesCS3A02G360300	C1	AT1G07520;AT1G07530;AT2G29060;AT2G29065;AT2G37650;AT3G46600;AT5G59450	AT1G07520;SCL14;SCL33;SCL34;SCL9;SCL30;SCL11	TraesCS6D02G135500	C4	AT2G25180;AT4G31920	ARR12;ARR10	Y1H
TraesCS2B02G183100	C1	AT1G74650;AT3G28910;AT3G47600;AT5G62470	ATY13;MYB30;MYB94;MYB96	TraesCS6D02G281200	C6	AT1G36060	ERF055	Y1H
TraesCS2B02G183100	C1	AT1G74650;AT3G28910;AT3G47600;AT5G62470	ATY13;MYB30;MYB94;MYB96	TraesCS6B02G331000	C5	AT1G36060	ERF055	Y1H
TraesCS2A02G157600	C1	AT1G74650;AT3G28910;AT3G47600;AT5G62470	ATY13;MYB30;MYB94;MYB96	TraesCS6D02G281200	C6	AT1G36060	ERF055	Y1H
TraesCS2A02G157600	C1	AT1G74650;AT3G28910;AT3G47600;AT5G62470	ATY13;MYB30;MYB94;MYB96	TraesCS6B02G331000	C5	AT1G36060	ERF055	Y1H
TraesCS5D02G234800	C4	AT1G74650;AT3G28910;AT3G47600;AT5G62470	ATY13;MYB30;MYB94;MYB96	TraesCS7D02G182700	C3	AT1G36060	ERF055	Y1H
TraesCS1B02G235100	C1	AT3G11020;AT5G05410	DREB2B;DREB2A	TraesCS6D02G281200	C6	AT1G36060	ERF055	Y1H
TraesCS1B02G235100	C1	AT3G11020;AT5G05410	DREB2B;DREB2A	TraesCS6B02G331000	C5	AT1G36060	ERF055	Y1H
TraesCS1D02G314800	C1	AT1G53170;AT3G15210;AT5G44210	ERF8;ERF4;ERF9	TraesCS7A02G180900	C5	AT1G36060	ERF055	Y1H
TraesCS1D02G314800	C1	AT1G53170;AT3G15210;AT5G44210	ERF8;ERF4;ERF9	TraesCS4B02G268100	C6	AT1G36060	ERF055	Y1H
TraesCS1D02G314800	C1	AT1G53170;AT3G15210;AT5G44210	ERF8;ERF4;ERF9	TraesCS4A02G035400	C2	AT1G36060	ERF055	Y1H
TraesCS1D02G314800	C1	AT1G53170;AT3G15210;AT5G44210	ERF8;ERF4;ERF9	TraesCS4D02G267500	C6	AT1G36060	ERF055	Y1H
TraesCS1D02G314800	C1	AT1G53170;AT3G15210;AT5G44210	ERF8;ERF4;ERF9	TraesCS7A02G160800	C2	AT1G19220;AT5G20730	ARF19;NPH4	Y1H
TraesCS1D02G314800	C1	AT1G53170;AT3G15210;AT5G44210	ERF8;ERF4;ERF9	TraesCS7D02G161900	C2	AT1G19220;AT5G20730	ARF19;NPH4	Y1H
TraesCS1D02G314800	C1	AT1G53170;AT3G15210;AT5G44210	ERF8;ERF4;ERF9	TraesCS7D02G469200	C4	AT1G36060	ERF055	Y1H
TraesCS1D02G314800	C1	AT1G53170;AT3G15210;AT5G44210	ERF8;ERF4;ERF9	TraesCS7D02G182700	C3	AT1G36060	ERF055	Y1H
TraesCS1D02G314800	C1	AT1G53170;AT3G15210;AT5G44210	ERF8;ERF4;ERF9	TraesCS2B02G122500	C4	AT2G30470;AT4G32010	VAL1;VAL2	Y1H
TraesCS1D02G314800	C1	AT1G53170;AT3G15210;AT5G44210	ERF8;ERF4;ERF9	TraesCS6B02G174400	C4	AT2G25180;AT4G31920	ARR12;ARR10	Y1H
TraesCS1D02G314800	C1	AT1G53170;AT3G15210;AT5G44210	ERF8;ERF4;ERF9	TraesCS6D02G135500	C4	AT2G25180;AT4G31920	ARR12;ARR10	Y1H
TraesCS1D02G314800	C1	AT1G53170;AT3G15210;AT5G44210	ERF8;ERF4;ERF9	TraesCS5D02G243900	C4	AT1G46264	HSFB4	Y1H
TraesCS3D02G249100	C1	AT1G28300;AT3G26790	LEC2;FUS3	TraesCS5D02G133600	C6	AT2G36010;AT5G22220	E2F3;E2FB	Y1H
TraesCS3D02G249100	C1	AT1G28300;AT3G26790	LEC2;FUS3	TraesCS6B02G233700	C6	AT2G36010;AT5G22220	E2F3;E2FB	Y1H
TraesCS3D02G249100	C1	AT1G28300;AT3G26790	LEC2;FUS3	TraesCS3D02G389100	C2	AT5G17430	BBM	review
TraesCS3D02G249100	C1	AT1G28300;AT3G26790	LEC2;FUS3	TraesCS3A02G395500	C2	AT5G17430	BBM	review
TraesCS3D02G249100	C1	AT1G28300;AT3G26790	LEC2;FUS3	TraesCS3B02G427300	C2	AT5G17430	BBM	review
TraesCS3D02G249100	C1	AT1G28300;AT3G26790	LEC2;FUS3	TraesCS2B02G378100	C3	AT5G17430	BBM	review
TraesCS3D02G249100	C1	AT1G28300;AT3G26790	LEC2;FUS3	TraesCS2D02G357600	C4	AT5G17430	BBM	review
TraesCS3D02G249100	C1	AT1G28300;AT3G26790	LEC2;FUS3	TraesCS6A02G229500	C4	AT5G17430	BBM	review
TraesCS3D02G249100	C1	AT1G28300;AT3G26790	LEC2;FUS3	TraesCS6D02G205300	C4	AT5G17430	BBM	review
TraesCS3D02G249100	C1	AT1G28300;AT3G26790	LEC2;FUS3	TraesCS1A02G052000	C4	AT2G28610	WOX3	Y1H
TraesCS3D02G249100	C1	AT1G28300;AT3G26790	LEC2;FUS3	TraesCS1D02G054000	C4	AT2G28610	WOX3	Y1H
TraesCS3D02G249100	C1	AT1G28300;AT3G26790	LEC2;FUS3	TraesCS1B02G069000	C4	AT2G28610	WOX3	Y1H
TraesCS1B02G235100	C1	AT3G11020;AT5G05410	DREB2B;DREB2A	TraesCS6A02G301900	C5	AT1G36060	ERF055	Y1H
TraesCS1D02G223600	C1	AT3G11020;AT5G05410	DREB2B;DREB2A	TraesCS6D02G281200	C6	AT1G36060	ERF055	Y1H
TraesCS1D02G223600	C1	AT3G11020;AT5G05410	DREB2B;DREB2A	TraesCS6B02G331000	C5	AT1G36060	ERF055	Y1H
TraesCS1D02G223600	C1	AT3G11020;AT5G05410	DREB2B;DREB2A	TraesCS6A02G301900	C5	AT1G36060	ERF055	Y1H
TraesCS1A02G221900	C1	AT3G11020;AT5G05410	DREB2B;DREB2A	TraesCS6D02G281200	C6	AT1G36060	ERF055	Y1H
TraesCS1A02G221900	C1	AT3G11020;AT5G05410	DREB2B;DREB2A	TraesCS6B02G331000	C5	AT1G36060	ERF055	Y1H
TraesCS1A02G221900	C1	AT3G11020;AT5G05410	DREB2B;DREB2A	TraesCS6A02G301900	C5	AT1G36060	ERF055	Y1H
TraesCS3A02G099200	C4	AT3G11020;AT5G05410	DREB2B;DREB2A	TraesCS6D02G281200	C6	AT1G36060	ERF055	Y1H
TraesCS3A02G099200	C4	AT3G11020;AT5G05410	DREB2B;DREB2A	TraesCS6B02G331000	C5	AT1G36060	ERF055	Y1H
TraesCS7A02G169300	C1	AT1G21910;AT1G44830;AT1G77640	ERF012;ERF014;ERF013	TraesCS7A02G180900	C5	AT1G36060	ERF055	Y1H
TraesCS7A02G169300	C1	AT1G21910;AT1G44830;AT1G77640	ERF012;ERF014;ERF013	TraesCS4B02G268100	C6	AT1G36060	ERF055	Y1H
TraesCS7A02G169300	C1	AT1G21910;AT1G44830;AT1G77640	ERF012;ERF014;ERF013	TraesCS4D02G267500	C6	AT1G36060	ERF055	Y1H
TraesCS3A02G099200	C4	AT3G11020;AT5G05410	DREB2B;DREB2A	TraesCS6A02G301900	C5	AT1G36060	ERF055	Y1H
TraesCS3D02G368000	C1	AT3G10580;AT3G10590;AT4G09450	AT3G10580;AT3G10590;AT4G09450	TraesCS6B02G174400	C4	AT2G25180;AT4G31920	ARR12;ARR10	Y1H
TraesCS3D02G368000	C1	AT3G10580;AT3G10590;AT4G09450	AT3G10580;AT3G10590;AT4G09450	TraesCS6D02G135500	C4	AT2G25180;AT4G31920	ARR12;ARR10	Y1H
TraesCS3A02G249100	C1	AT1G28300;AT3G26790	LEC2;FUS3	TraesCS5D02G133600	C6	AT2G36010;AT5G22220	E2F3;E2FB	Y1H
TraesCS3A02G249100	C1	AT1G28300;AT3G26790	LEC2;FUS3	TraesCS6B02G233700	C6	AT2G36010;AT5G22220	E2F3;E2FB	Y1H
TraesCS3A02G249100	C1	AT1G28300;AT3G26790	LEC2;FUS3	TraesCS3D02G389100	C2	AT5G17430	BBM	review
TraesCS3A02G249100	C1	AT1G28300;AT3G26790	LEC2;FUS3	TraesCS3A02G395500	C2	AT5G17430	BBM	review
TraesCS3A02G249100	C1	AT1G28300;AT3G26790	LEC2;FUS3	TraesCS3B02G427300	C2	AT5G17430	BBM	review
TraesCS3A02G249100	C1	AT1G28300;AT3G26790	LEC2;FUS3	TraesCS2B02G378100	C3	AT5G17430	BBM	review
TraesCS3A02G249100	C1	AT1G28300;AT3G26790	LEC2;FUS3	TraesCS2D02G357600	C4	AT5G17430	BBM	review
TraesCS3A02G249100	C1	AT1G28300;AT3G26790	LEC2;FUS3	TraesCS6A02G229500	C4	AT5G17430	BBM	review
TraesCS3A02G249100	C1	AT1G28300;AT3G26790	LEC2;FUS3	TraesCS6D02G205300	C4	AT5G17430	BBM	review
TraesCS3A02G249100	C1	AT1G28300;AT3G26790	LEC2;FUS3	TraesCS1A02G052000	C4	AT2G28610	WOX3	Y1H
TraesCS3A02G249100	C1	AT1G28300;AT3G26790	LEC2;FUS3	TraesCS1D02G054000	C4	AT2G28610	WOX3	Y1H
TraesCS3A02G249100	C1	AT1G28300;AT3G26790	LEC2;FUS3	TraesCS1B02G069000	C4	AT2G28610	WOX3	Y1H
TraesCS3B02G407700	C1	AT3G10580;AT3G10590;AT4G09450	AT3G10580;AT3G10590;AT4G09450	TraesCS6B02G174400	C4	AT2G25180;AT4G31920	ARR12;ARR10	Y1H
TraesCS3B02G407700	C1	AT3G10580;AT3G10590;AT4G09450	AT3G10580;AT3G10590;AT4G09450	TraesCS6D02G135500	C4	AT2G25180;AT4G31920	ARR12;ARR10	Y1H
TraesCS3A02G099200	C4	AT3G11020;AT5G05410	DREB2B;DREB2A	TraesCS7A02G180900	C5	AT1G36060	ERF055	Y1H
TraesCS3A02G099200	C4	AT3G11020;AT5G05410	DREB2B;DREB2A	TraesCS4B02G268100	C6	AT1G36060	ERF055	Y1H
TraesCS3A02G099200	C4	AT3G11020;AT5G05410	DREB2B;DREB2A	TraesCS4A02G035400	C2	AT1G36060	ERF055	Y1H
TraesCS3A02G099200	C4	AT3G11020;AT5G05410	DREB2B;DREB2A	TraesCS4D02G267500	C6	AT1G36060	ERF055	Y1H
TraesCS3A02G099200	C4	AT3G11020;AT5G05410	DREB2B;DREB2A	TraesCS7D02G469200	C4	AT1G36060	ERF055	Y1H
TraesCS4A02G433200	C1	AT1G12610;AT1G63030;AT4G25470;AT4G25480;AT4G25490;AT5G51990	DREB1F;DREB1E;DREB1C;DREB1A;DREB1B;DREB1D	TraesCS7A02G160800	C2	AT1G19220;AT5G20730	ARF19;NPH4	Y1H
TraesCS4A02G433200	C1	AT1G12610;AT1G63030;AT4G25470;AT4G25480;AT4G25490;AT5G51990	DREB1F;DREB1E;DREB1C;DREB1A;DREB1B;DREB1D	TraesCS7D02G161900	C2	AT1G19220;AT5G20730	ARF19;NPH4	Y1H
TraesCS4A02G433200	C1	AT1G12610;AT1G63030;AT4G25470;AT4G25480;AT4G25490;AT5G51990	DREB1F;DREB1E;DREB1C;DREB1A;DREB1B;DREB1D	TraesCS6B02G174400	C4	AT2G25180;AT4G31920	ARR12;ARR10	Y1H
TraesCS4A02G433200	C1	AT1G12610;AT1G63030;AT4G25470;AT4G25480;AT4G25490;AT5G51990	DREB1F;DREB1E;DREB1C;DREB1A;DREB1B;DREB1D	TraesCS6D02G135500	C4	AT2G25180;AT4G31920	ARR12;ARR10	Y1H
TraesCS4A02G433200	C1	AT1G12610;AT1G63030;AT4G25470;AT4G25480;AT4G25490;AT5G51990	DREB1F;DREB1E;DREB1C;DREB1A;DREB1B;DREB1D	TraesCS1B02G168900	C4	AT3G24810;AT5G48820	KRP5;KRP3	Y1H
TraesCS3A02G099200	C4	AT3G11020;AT5G05410	DREB2B;DREB2A	TraesCS7D02G182700	C3	AT1G36060	ERF055	Y1H
TraesCS7A02G169300	C1	AT1G21910;AT1G44830;AT1G77640	ERF012;ERF014;ERF013	TraesCS6D02G281200	C6	AT1G36060	ERF055	Y1H
TraesCS7A02G169300	C1	AT1G21910;AT1G44830;AT1G77640	ERF012;ERF014;ERF013	TraesCS6B02G331000	C5	AT1G36060	ERF055	Y1H
TraesCS7A02G169300	C1	AT1G21910;AT1G44830;AT1G77640	ERF012;ERF014;ERF013	TraesCS6A02G301900	C5	AT1G36060	ERF055	Y1H
TraesCS4A02G088400	C5	AT1G21910;AT1G44830;AT1G77640	ERF012;ERF014;ERF013	TraesCS6D02G281200	C6	AT1G36060	ERF055	Y1H
TraesCS4A02G088400	C5	AT1G21910;AT1G44830;AT1G77640	ERF012;ERF014;ERF013	TraesCS6B02G331000	C5	AT1G36060	ERF055	Y1H
TraesCS4A02G088400	C5	AT1G21910;AT1G44830;AT1G77640	ERF012;ERF014;ERF013	TraesCS6A02G301900	C5	AT1G36060	ERF055	Y1H
TraesCS1A02G314300	C1	AT1G53170;AT3G15210;AT5G44210	ERF8;ERF4;ERF9	TraesCS7A02G180900	C5	AT1G36060	ERF055	Y1H
TraesCS1A02G314300	C1	AT1G53170;AT3G15210;AT5G44210	ERF8;ERF4;ERF9	TraesCS4B02G268100	C6	AT1G36060	ERF055	Y1H
TraesCS1A02G314300	C1	AT1G53170;AT3G15210;AT5G44210	ERF8;ERF4;ERF9	TraesCS4A02G035400	C2	AT1G36060	ERF055	Y1H
TraesCS1A02G314300	C1	AT1G53170;AT3G15210;AT5G44210	ERF8;ERF4;ERF9	TraesCS4D02G267500	C6	AT1G36060	ERF055	Y1H
TraesCS1A02G314300	C1	AT1G53170;AT3G15210;AT5G44210	ERF8;ERF4;ERF9	TraesCS7A02G160800	C2	AT1G19220;AT5G20730	ARF19;NPH4	Y1H
TraesCS1A02G314300	C1	AT1G53170;AT3G15210;AT5G44210	ERF8;ERF4;ERF9	TraesCS7D02G161900	C2	AT1G19220;AT5G20730	ARF19;NPH4	Y1H
TraesCS1A02G314300	C1	AT1G53170;AT3G15210;AT5G44210	ERF8;ERF4;ERF9	TraesCS7D02G469200	C4	AT1G36060	ERF055	Y1H
TraesCS1A02G314300	C1	AT1G53170;AT3G15210;AT5G44210	ERF8;ERF4;ERF9	TraesCS7D02G182700	C3	AT1G36060	ERF055	Y1H
TraesCS1A02G314300	C1	AT1G53170;AT3G15210;AT5G44210	ERF8;ERF4;ERF9	TraesCS2B02G122500	C4	AT2G30470;AT4G32010	VAL1;VAL2	Y1H
TraesCS1A02G314300	C1	AT1G53170;AT3G15210;AT5G44210	ERF8;ERF4;ERF9	TraesCS6B02G174400	C4	AT2G25180;AT4G31920	ARR12;ARR10	Y1H
TraesCS1A02G314300	C1	AT1G53170;AT3G15210;AT5G44210	ERF8;ERF4;ERF9	TraesCS6D02G135500	C4	AT2G25180;AT4G31920	ARR12;ARR10	Y1H
TraesCS1A02G314300	C1	AT1G53170;AT3G15210;AT5G44210	ERF8;ERF4;ERF9	TraesCS5D02G243900	C4	AT1G46264	HSFB4	Y1H
TraesCS4A02G088400	C5	AT1G21910;AT1G44830;AT1G77640	ERF012;ERF014;ERF013	TraesCS7A02G180900	C5	AT1G36060	ERF055	Y1H
TraesCS4A02G088400	C5	AT1G21910;AT1G44830;AT1G77640	ERF012;ERF014;ERF013	TraesCS4B02G268100	C6	AT1G36060	ERF055	Y1H
TraesCS4A02G088400	C5	AT1G21910;AT1G44830;AT1G77640	ERF012;ERF014;ERF013	TraesCS4A02G035400	C2	AT1G36060	ERF055	Y1H
TraesCS7D02G052400	C1	AT1G12610;AT1G63030;AT4G25470;AT4G25480;AT4G25490;AT5G51990	DREB1F;DREB1E;DREB1C;DREB1A;DREB1B;DREB1D	TraesCS7A02G160800	C2	AT1G19220;AT5G20730	ARF19;NPH4	Y1H
TraesCS7D02G052400	C1	AT1G12610;AT1G63030;AT4G25470;AT4G25480;AT4G25490;AT5G51990	DREB1F;DREB1E;DREB1C;DREB1A;DREB1B;DREB1D	TraesCS7D02G161900	C2	AT1G19220;AT5G20730	ARF19;NPH4	Y1H
TraesCS7D02G052400	C1	AT1G12610;AT1G63030;AT4G25470;AT4G25480;AT4G25490;AT5G51990	DREB1F;DREB1E;DREB1C;DREB1A;DREB1B;DREB1D	TraesCS6B02G174400	C4	AT2G25180;AT4G31920	ARR12;ARR10	Y1H
TraesCS7D02G052400	C1	AT1G12610;AT1G63030;AT4G25470;AT4G25480;AT4G25490;AT5G51990	DREB1F;DREB1E;DREB1C;DREB1A;DREB1B;DREB1D	TraesCS6D02G135500	C4	AT2G25180;AT4G31920	ARR12;ARR10	Y1H
TraesCS7D02G052400	C1	AT1G12610;AT1G63030;AT4G25470;AT4G25480;AT4G25490;AT5G51990	DREB1F;DREB1E;DREB1C;DREB1A;DREB1B;DREB1D	TraesCS1B02G168900	C4	AT3G24810;AT5G48820	KRP5;KRP3	Y1H
TraesCS4D02G080100	C4	AT1G47655;AT3G50410;AT5G66940	DOF1.6;DOF3.4;DOF5.8	TraesCS6B02G174400	C4	AT2G25180;AT4G31920	ARR12;ARR10	Y1H
TraesCS4D02G080100	C4	AT1G47655;AT3G50410;AT5G66940	DOF1.6;DOF3.4;DOF5.8	TraesCS6D02G135500	C4	AT2G25180;AT4G31920	ARR12;ARR10	Y1H
TraesCS4A02G088400	C5	AT1G21910;AT1G44830;AT1G77640	ERF012;ERF014;ERF013	TraesCS4D02G267500	C6	AT1G36060	ERF055	Y1H
TraesCS6A02G330500	C4	AT1G21910;AT1G44830;AT1G77640	ERF012;ERF014;ERF013	TraesCS4A02G035400	C2	AT1G36060	ERF055	Y1H
TraesCS6A02G330500	C4	AT1G21910;AT1G44830;AT1G77640	ERF012;ERF014;ERF013	TraesCS7D02G469200	C4	AT1G36060	ERF055	Y1H
TraesCS6A02G330500	C4	AT1G21910;AT1G44830;AT1G77640	ERF012;ERF014;ERF013	TraesCS7D02G182700	C3	AT1G36060	ERF055	Y1H
TraesCS6B02G361400	C4	AT1G21910;AT1G44830;AT1G77640	ERF012;ERF014;ERF013	TraesCS7D02G469200	C4	AT1G36060	ERF055	Y1H
TraesCS6B02G361400	C4	AT1G21910;AT1G44830;AT1G77640	ERF012;ERF014;ERF013	TraesCS7D02G182700	C3	AT1G36060	ERF055	Y1H
TraesCS6D02G309600	C4	AT1G21910;AT1G44830;AT1G77640	ERF012;ERF014;ERF013	TraesCS4A02G035400	C2	AT1G36060	ERF055	Y1H
TraesCS6D02G309600	C4	AT1G21910;AT1G44830;AT1G77640	ERF012;ERF014;ERF013	TraesCS7D02G469200	C4	AT1G36060	ERF055	Y1H
TraesCS1B02G235100	C1	AT3G11020;AT5G05410	DREB2B;DREB2A	TraesCS7A02G180900	C5	AT1G36060	ERF055	Y1H
TraesCS1B02G235100	C1	AT3G11020;AT5G05410	DREB2B;DREB2A	TraesCS4B02G268100	C6	AT1G36060	ERF055	Y1H
TraesCS1B02G235100	C1	AT3G11020;AT5G05410	DREB2B;DREB2A	TraesCS4A02G035400	C2	AT1G36060	ERF055	Y1H
TraesCS1B02G235100	C1	AT3G11020;AT5G05410	DREB2B;DREB2A	TraesCS4D02G267500	C6	AT1G36060	ERF055	Y1H
TraesCS1B02G235100	C1	AT3G11020;AT5G05410	DREB2B;DREB2A	TraesCS4D02G332500	C3	AT3G24810;AT5G48820	KRP5;KRP3	Y1H
TraesCS1B02G235100	C1	AT3G11020;AT5G05410	DREB2B;DREB2A	TraesCS7A02G160800	C2	AT1G19220;AT5G20730	ARF19;NPH4	Y1H
TraesCS1B02G235100	C1	AT3G11020;AT5G05410	DREB2B;DREB2A	TraesCS7D02G161900	C2	AT1G19220;AT5G20730	ARF19;NPH4	Y1H
TraesCS1B02G235100	C1	AT3G11020;AT5G05410	DREB2B;DREB2A	TraesCS7D02G469200	C4	AT1G36060	ERF055	Y1H
TraesCS1B02G235100	C1	AT3G11020;AT5G05410	DREB2B;DREB2A	TraesCS7D02G182700	C3	AT1G36060	ERF055	Y1H
TraesCS1B02G235100	C1	AT3G11020;AT5G05410	DREB2B;DREB2A	TraesCS6B02G174400	C4	AT2G25180;AT4G31920	ARR12;ARR10	Y1H
TraesCS1B02G235100	C1	AT3G11020;AT5G05410	DREB2B;DREB2A	TraesCS6D02G135500	C4	AT2G25180;AT4G31920	ARR12;ARR10	Y1H
TraesCS1B02G235100	C1	AT3G11020;AT5G05410	DREB2B;DREB2A	TraesCS1B02G168900	C4	AT3G24810;AT5G48820	KRP5;KRP3	Y1H
TraesCS1B02G235100	C1	AT3G11020;AT5G05410	DREB2B;DREB2A	TraesCS5D02G243900	C4	AT1G46264	HSFB4	Y1H
TraesCS6D02G309600	C4	AT1G21910;AT1G44830;AT1G77640	ERF012;ERF014;ERF013	TraesCS7D02G182700	C3	AT1G36060	ERF055	Y1H
TraesCS6A02G235100	C1	AT2G20880;AT2G46310;AT4G28140	ERF053;CRF5;ERF054	TraesCS6D02G281200	C6	AT1G36060	ERF055	Y1H
TraesCS6A02G235100	C1	AT2G20880;AT2G46310;AT4G28140	ERF053;CRF5;ERF054	TraesCS6B02G331000	C5	AT1G36060	ERF055	Y1H
TraesCS6A02G235100	C1	AT2G20880;AT2G46310;AT4G28140	ERF053;CRF5;ERF054	TraesCS6A02G301900	C5	AT1G36060	ERF055	Y1H
TraesCS6D02G217800	C2	AT2G20880;AT2G46310;AT4G28140	ERF053;CRF5;ERF054	TraesCS4A02G035400	C2	AT1G36060	ERF055	Y1H
TraesCS6D02G217800	C2	AT2G20880;AT2G46310;AT4G28140	ERF053;CRF5;ERF054	TraesCS7D02G469200	C4	AT1G36060	ERF055	Y1H
TraesCS6B02G263800	C2	AT2G20880;AT2G46310;AT4G28140	ERF053;CRF5;ERF054	TraesCS6D02G281200	C6	AT1G36060	ERF055	Y1H
TraesCS6B02G263800	C2	AT2G20880;AT2G46310;AT4G28140	ERF053;CRF5;ERF054	TraesCS4B02G268100	C6	AT1G36060	ERF055	Y1H
TraesCS1D02G223600	C1	AT3G11020;AT5G05410	DREB2B;DREB2A	TraesCS7A02G180900	C5	AT1G36060	ERF055	Y1H
TraesCS1D02G223600	C1	AT3G11020;AT5G05410	DREB2B;DREB2A	TraesCS4B02G268100	C6	AT1G36060	ERF055	Y1H
TraesCS1D02G223600	C1	AT3G11020;AT5G05410	DREB2B;DREB2A	TraesCS4A02G035400	C2	AT1G36060	ERF055	Y1H
TraesCS1D02G223600	C1	AT3G11020;AT5G05410	DREB2B;DREB2A	TraesCS4D02G267500	C6	AT1G36060	ERF055	Y1H
TraesCS1D02G223600	C1	AT3G11020;AT5G05410	DREB2B;DREB2A	TraesCS4D02G332500	C3	AT3G24810;AT5G48820	KRP5;KRP3	Y1H
TraesCS1D02G223600	C1	AT3G11020;AT5G05410	DREB2B;DREB2A	TraesCS7A02G160800	C2	AT1G19220;AT5G20730	ARF19;NPH4	Y1H
TraesCS1D02G223600	C1	AT3G11020;AT5G05410	DREB2B;DREB2A	TraesCS7D02G161900	C2	AT1G19220;AT5G20730	ARF19;NPH4	Y1H
TraesCS1D02G223600	C1	AT3G11020;AT5G05410	DREB2B;DREB2A	TraesCS7D02G469200	C4	AT1G36060	ERF055	Y1H
TraesCS1D02G223600	C1	AT3G11020;AT5G05410	DREB2B;DREB2A	TraesCS7D02G182700	C3	AT1G36060	ERF055	Y1H
TraesCS1D02G223600	C1	AT3G11020;AT5G05410	DREB2B;DREB2A	TraesCS6B02G174400	C4	AT2G25180;AT4G31920	ARR12;ARR10	Y1H
TraesCS1D02G223600	C1	AT3G11020;AT5G05410	DREB2B;DREB2A	TraesCS6D02G135500	C4	AT2G25180;AT4G31920	ARR12;ARR10	Y1H
TraesCS1D02G223600	C1	AT3G11020;AT5G05410	DREB2B;DREB2A	TraesCS1B02G168900	C4	AT3G24810;AT5G48820	KRP5;KRP3	Y1H
TraesCS1D02G223600	C1	AT3G11020;AT5G05410	DREB2B;DREB2A	TraesCS5D02G243900	C4	AT1G46264	HSFB4	Y1H
TraesCS1A02G231200	C1	AT3G16770	RAP2-3	TraesCS5D02G206200	C4	AT1G70210	CYCD1-1	Y1H
TraesCS3A02G375500	C1	AT3G10580;AT3G10590;AT4G09450	AT3G10580;AT3G10590;AT4G09450	TraesCS6B02G174400	C4	AT2G25180;AT4G31920	ARR12;ARR10	Y1H
TraesCS3A02G375500	C1	AT3G10580;AT3G10590;AT4G09450	AT3G10580;AT3G10590;AT4G09450	TraesCS6D02G135500	C4	AT2G25180;AT4G31920	ARR12;ARR10	Y1H
TraesCS6B02G263800	C2	AT2G20880;AT2G46310;AT4G28140	ERF053;CRF5;ERF054	TraesCS4A02G035400	C2	AT1G36060	ERF055	Y1H
TraesCS6B02G263800	C2	AT2G20880;AT2G46310;AT4G28140	ERF053;CRF5;ERF054	TraesCS4D02G267500	C6	AT1G36060	ERF055	Y1H
TraesCS6B02G263800	C2	AT2G20880;AT2G46310;AT4G28140	ERF053;CRF5;ERF054	TraesCS7D02G469200	C4	AT1G36060	ERF055	Y1H
TraesCS6B02G263800	C2	AT2G20880;AT2G46310;AT4G28140	ERF053;CRF5;ERF054	TraesCS7D02G182700	C3	AT1G36060	ERF055	Y1H
TraesCS3A02G371800	C1	AT2G36270	ABI5	TraesCS7A02G180900	C5	AT1G36060	ERF055	Y1H
TraesCS3A02G371800	C1	AT2G36270	ABI5	TraesCS4D02G267500	C6	AT1G36060	ERF055	Y1H
TraesCS6B02G263800	C2	AT2G20880;AT2G46310;AT4G28140	ERF053;CRF5;ERF054	TraesCS6B02G331000	C5	AT1G36060	ERF055	Y1H
TraesCS6B02G263800	C2	AT2G20880;AT2G46310;AT4G28140	ERF053;CRF5;ERF054	TraesCS6A02G301900	C5	AT1G36060	ERF055	Y1H
TraesCS6B02G263800	C2	AT2G20880;AT2G46310;AT4G28140	ERF053;CRF5;ERF054	TraesCS7A02G180900	C5	AT1G36060	ERF055	Y1H
TraesCS7A02G057700	C1	AT1G12610;AT1G63030;AT4G25470;AT4G25480;AT4G25490;AT5G51990	DREB1F;DREB1E;DREB1C;DREB1A;DREB1B;DREB1D	TraesCS7A02G160800	C2	AT1G19220;AT5G20730	ARF19;NPH4	Y1H
TraesCS7A02G057700	C1	AT1G12610;AT1G63030;AT4G25470;AT4G25480;AT4G25490;AT5G51990	DREB1F;DREB1E;DREB1C;DREB1A;DREB1B;DREB1D	TraesCS7D02G161900	C2	AT1G19220;AT5G20730	ARF19;NPH4	Y1H
TraesCS7A02G057700	C1	AT1G12610;AT1G63030;AT4G25470;AT4G25480;AT4G25490;AT5G51990	DREB1F;DREB1E;DREB1C;DREB1A;DREB1B;DREB1D	TraesCS6B02G174400	C4	AT2G25180;AT4G31920	ARR12;ARR10	Y1H
TraesCS7A02G057700	C1	AT1G12610;AT1G63030;AT4G25470;AT4G25480;AT4G25490;AT5G51990	DREB1F;DREB1E;DREB1C;DREB1A;DREB1B;DREB1D	TraesCS6D02G135500	C4	AT2G25180;AT4G31920	ARR12;ARR10	Y1H
TraesCS7A02G057700	C1	AT1G12610;AT1G63030;AT4G25470;AT4G25480;AT4G25490;AT5G51990	DREB1F;DREB1E;DREB1C;DREB1A;DREB1B;DREB1D	TraesCS1B02G168900	C4	AT3G24810;AT5G48820	KRP5;KRP3	Y1H
TraesCS2D02G286300	C6	AT5G13330	ERF113	TraesCS6D02G281200	C6	AT1G36060	ERF055	Y1H
TraesCS2D02G286300	C6	AT5G13330	ERF113	TraesCS6B02G331000	C5	AT1G36060	ERF055	Y1H
TraesCS2D02G286300	C6	AT5G13330	ERF113	TraesCS6A02G301900	C5	AT1G36060	ERF055	Y1H
TraesCS2D02G286300	C6	AT5G13330	ERF113	TraesCS7A02G180900	C5	AT1G36060	ERF055	Y1H
TraesCS2D02G286300	C6	AT5G13330	ERF113	TraesCS4B02G268100	C6	AT1G36060	ERF055	Y1H
TraesCS2D02G286300	C6	AT5G13330	ERF113	TraesCS4A02G035400	C2	AT1G36060	ERF055	Y1H
TraesCS2D02G286300	C6	AT5G13330	ERF113	TraesCS4D02G267500	C6	AT1G36060	ERF055	Y1H
TraesCS2A02G288000	C6	AT5G13330	ERF113	TraesCS6D02G281200	C6	AT1G36060	ERF055	Y1H
TraesCS1A02G221900	C1	AT3G11020;AT5G05410	DREB2B;DREB2A	TraesCS7A02G180900	C5	AT1G36060	ERF055	Y1H
TraesCS1A02G221900	C1	AT3G11020;AT5G05410	DREB2B;DREB2A	TraesCS4B02G268100	C6	AT1G36060	ERF055	Y1H
TraesCS1A02G221900	C1	AT3G11020;AT5G05410	DREB2B;DREB2A	TraesCS4A02G035400	C2	AT1G36060	ERF055	Y1H
TraesCS1A02G221900	C1	AT3G11020;AT5G05410	DREB2B;DREB2A	TraesCS4D02G267500	C6	AT1G36060	ERF055	Y1H
TraesCS1A02G221900	C1	AT3G11020;AT5G05410	DREB2B;DREB2A	TraesCS4D02G332500	C3	AT3G24810;AT5G48820	KRP5;KRP3	Y1H
TraesCS1A02G221900	C1	AT3G11020;AT5G05410	DREB2B;DREB2A	TraesCS7A02G160800	C2	AT1G19220;AT5G20730	ARF19;NPH4	Y1H
TraesCS1A02G221900	C1	AT3G11020;AT5G05410	DREB2B;DREB2A	TraesCS7D02G161900	C2	AT1G19220;AT5G20730	ARF19;NPH4	Y1H
TraesCS1A02G221900	C1	AT3G11020;AT5G05410	DREB2B;DREB2A	TraesCS7D02G469200	C4	AT1G36060	ERF055	Y1H
TraesCS1A02G221900	C1	AT3G11020;AT5G05410	DREB2B;DREB2A	TraesCS7D02G182700	C3	AT1G36060	ERF055	Y1H
TraesCS1A02G221900	C1	AT3G11020;AT5G05410	DREB2B;DREB2A	TraesCS6B02G174400	C4	AT2G25180;AT4G31920	ARR12;ARR10	Y1H
TraesCS1A02G221900	C1	AT3G11020;AT5G05410	DREB2B;DREB2A	TraesCS6D02G135500	C4	AT2G25180;AT4G31920	ARR12;ARR10	Y1H
TraesCS1A02G221900	C1	AT3G11020;AT5G05410	DREB2B;DREB2A	TraesCS1B02G168900	C4	AT3G24810;AT5G48820	KRP5;KRP3	Y1H
TraesCS1A02G221900	C1	AT3G11020;AT5G05410	DREB2B;DREB2A	TraesCS5D02G243900	C4	AT1G46264	HSFB4	Y1H
TraesCS2D02G563400	C1	AT1G47655;AT3G50410;AT5G66940	DOF1.6;DOF3.4;DOF5.8	TraesCS6B02G174400	C4	AT2G25180;AT4G31920	ARR12;ARR10	Y1H
TraesCS2D02G563400	C1	AT1G47655;AT3G50410;AT5G66940	DOF1.6;DOF3.4;DOF5.8	TraesCS6D02G135500	C4	AT2G25180;AT4G31920	ARR12;ARR10	Y1H
TraesCS2A02G288000	C6	AT5G13330	ERF113	TraesCS6B02G331000	C5	AT1G36060	ERF055	Y1H
TraesCS2A02G288000	C6	AT5G13330	ERF113	TraesCS6A02G301900	C5	AT1G36060	ERF055	Y1H
TraesCS2A02G288000	C6	AT5G13330	ERF113	TraesCS7A02G180900	C5	AT1G36060	ERF055	Y1H
TraesCS2A02G288000	C6	AT5G13330	ERF113	TraesCS4B02G268100	C6	AT1G36060	ERF055	Y1H
TraesCS2A02G288000	C6	AT5G13330	ERF113	TraesCS4A02G035400	C2	AT1G36060	ERF055	Y1H
TraesCS2A02G288000	C6	AT5G13330	ERF113	TraesCS4D02G267500	C6	AT1G36060	ERF055	Y1H
TraesCS2B02G304800	C6	AT5G13330	ERF113	TraesCS6D02G281200	C6	AT1G36060	ERF055	Y1H
TraesCS3D02G321500	C1	AT1G53170;AT3G15210;AT5G44210	ERF8;ERF4;ERF9	TraesCS7A02G180900	C5	AT1G36060	ERF055	Y1H
TraesCS3D02G321500	C1	AT1G53170;AT3G15210;AT5G44210	ERF8;ERF4;ERF9	TraesCS4B02G268100	C6	AT1G36060	ERF055	Y1H
TraesCS3D02G321500	C1	AT1G53170;AT3G15210;AT5G44210	ERF8;ERF4;ERF9	TraesCS4A02G035400	C2	AT1G36060	ERF055	Y1H
TraesCS3D02G321500	C1	AT1G53170;AT3G15210;AT5G44210	ERF8;ERF4;ERF9	TraesCS4D02G267500	C6	AT1G36060	ERF055	Y1H
TraesCS3D02G321500	C1	AT1G53170;AT3G15210;AT5G44210	ERF8;ERF4;ERF9	TraesCS7A02G160800	C2	AT1G19220;AT5G20730	ARF19;NPH4	Y1H
TraesCS3D02G321500	C1	AT1G53170;AT3G15210;AT5G44210	ERF8;ERF4;ERF9	TraesCS7D02G161900	C2	AT1G19220;AT5G20730	ARF19;NPH4	Y1H
TraesCS3D02G321500	C1	AT1G53170;AT3G15210;AT5G44210	ERF8;ERF4;ERF9	TraesCS7D02G469200	C4	AT1G36060	ERF055	Y1H
TraesCS3D02G321500	C1	AT1G53170;AT3G15210;AT5G44210	ERF8;ERF4;ERF9	TraesCS7D02G182700	C3	AT1G36060	ERF055	Y1H
TraesCS3D02G321500	C1	AT1G53170;AT3G15210;AT5G44210	ERF8;ERF4;ERF9	TraesCS2B02G122500	C4	AT2G30470;AT4G32010	VAL1;VAL2	Y1H
TraesCS3D02G321500	C1	AT1G53170;AT3G15210;AT5G44210	ERF8;ERF4;ERF9	TraesCS6B02G174400	C4	AT2G25180;AT4G31920	ARR12;ARR10	Y1H
TraesCS3D02G321500	C1	AT1G53170;AT3G15210;AT5G44210	ERF8;ERF4;ERF9	TraesCS6D02G135500	C4	AT2G25180;AT4G31920	ARR12;ARR10	Y1H
TraesCS3D02G321500	C1	AT1G53170;AT3G15210;AT5G44210	ERF8;ERF4;ERF9	TraesCS5D02G243900	C4	AT1G46264	HSFB4	Y1H
TraesCS2B02G304800	C6	AT5G13330	ERF113	TraesCS6B02G331000	C5	AT1G36060	ERF055	Y1H
TraesCS2B02G304800	C6	AT5G13330	ERF113	TraesCS6A02G301900	C5	AT1G36060	ERF055	Y1H
TraesCS2B02G304800	C6	AT5G13330	ERF113	TraesCS7A02G180900	C5	AT1G36060	ERF055	Y1H
TraesCS2B02G304800	C6	AT5G13330	ERF113	TraesCS4B02G268100	C6	AT1G36060	ERF055	Y1H
TraesCS6B02G451300	C1	AT3G10480;AT3G10490;AT3G10500;AT5G04410	ANAC050;ANAC052;NAC053;NAC078	TraesCS7A02G180900	C5	AT1G36060	ERF055	Y1H
TraesCS6B02G451300	C1	AT3G10480;AT3G10490;AT3G10500;AT5G04410	ANAC050;ANAC052;NAC053;NAC078	TraesCS4D02G267500	C6	AT1G36060	ERF055	Y1H
TraesCS6B02G451300	C1	AT3G10480;AT3G10490;AT3G10500;AT5G04410	ANAC050;ANAC052;NAC053;NAC078	TraesCS4D02G332500	C3	AT3G24810;AT5G48820	KRP5;KRP3	Y1H
TraesCS6B02G451300	C1	AT3G10480;AT3G10490;AT3G10500;AT5G04410	ANAC050;ANAC052;NAC053;NAC078	TraesCS7A02G160800	C2	AT1G19220;AT5G20730	ARF19;NPH4	Y1H
TraesCS6B02G451300	C1	AT3G10480;AT3G10490;AT3G10500;AT5G04410	ANAC050;ANAC052;NAC053;NAC078	TraesCS7D02G161900	C2	AT1G19220;AT5G20730	ARF19;NPH4	Y1H
TraesCS6B02G451300	C1	AT3G10480;AT3G10490;AT3G10500;AT5G04410	ANAC050;ANAC052;NAC053;NAC078	TraesCS7B02G065800	C3	AT1G19220;AT5G20730	ARF19;NPH4	Y1H
TraesCS6B02G451300	C1	AT3G10480;AT3G10490;AT3G10500;AT5G04410	ANAC050;ANAC052;NAC053;NAC078	TraesCS7D02G469200	C4	AT1G36060	ERF055	Y1H
TraesCS6B02G451300	C1	AT3G10480;AT3G10490;AT3G10500;AT5G04410	ANAC050;ANAC052;NAC053;NAC078	TraesCS7D02G182700	C3	AT1G36060	ERF055	Y1H
TraesCS6B02G451300	C1	AT3G10480;AT3G10490;AT3G10500;AT5G04410	ANAC050;ANAC052;NAC053;NAC078	TraesCS2B02G122500	C4	AT2G30470;AT4G32010	VAL1;VAL2	Y1H
TraesCS5D02G150700	C1	AT2G41070;AT3G56850	EEL;DPBF3	TraesCS7D02G161900	C2	AT1G19220;AT5G20730	ARF19;NPH4	Y1H
TraesCS5D02G150700	C1	AT2G41070;AT3G56850	EEL;DPBF3	TraesCS7B02G065800	C3	AT1G19220;AT5G20730	ARF19;NPH4	Y1H
TraesCS2B02G304800	C6	AT5G13330	ERF113	TraesCS4A02G035400	C2	AT1G36060	ERF055	Y1H
TraesCS5A02G227100	C1	AT1G69600;AT3G28920;AT5G15210;AT5G39760;AT5G60480	ZHD11;ZHD9;ZHD8;ZHD10;ZHD12	TraesCS4D02G332500	C3	AT3G24810;AT5G48820	KRP5;KRP3	Y1H
TraesCS2B02G304800	C6	AT5G13330	ERF113	TraesCS4D02G267500	C6	AT1G36060	ERF055	Y1H
TraesCS5D02G234600	C1	AT1G69600;AT3G28920;AT5G15210;AT5G39760;AT5G60480	ZHD11;ZHD9;ZHD8;ZHD10;ZHD12	TraesCS4D02G332500	C3	AT3G24810;AT5G48820	KRP5;KRP3	Y1H
TraesCS3B02G357500	C1	AT1G53170;AT3G15210;AT5G44210	ERF8;ERF4;ERF9	TraesCS6D02G281200	C6	AT1G36060	ERF055	Y1H
TraesCS3B02G357500	C1	AT1G53170;AT3G15210;AT5G44210	ERF8;ERF4;ERF9	TraesCS6B02G331000	C5	AT1G36060	ERF055	Y1H
TraesCS3B02G357500	C1	AT1G53170;AT3G15210;AT5G44210	ERF8;ERF4;ERF9	TraesCS6A02G301900	C5	AT1G36060	ERF055	Y1H
TraesCS2B02G592700	C1	AT1G47655;AT3G50410;AT5G66940	DOF1.6;DOF3.4;DOF5.8	TraesCS6B02G174400	C4	AT2G25180;AT4G31920	ARR12;ARR10	Y1H
TraesCS2B02G592700	C1	AT1G47655;AT3G50410;AT5G66940	DOF1.6;DOF3.4;DOF5.8	TraesCS6D02G135500	C4	AT2G25180;AT4G31920	ARR12;ARR10	Y1H
TraesCS1B02G326600	C1	AT1G53170;AT3G15210;AT5G44210	ERF8;ERF4;ERF9	TraesCS6D02G281200	C6	AT1G36060	ERF055	Y1H
TraesCS5B02G225700	C1	AT1G69600;AT3G28920;AT5G15210;AT5G39760;AT5G60480	ZHD11;ZHD9;ZHD8;ZHD10;ZHD12	TraesCS4D02G332500	C3	AT3G24810;AT5G48820	KRP5;KRP3	Y1H
TraesCS1B02G326600	C1	AT1G53170;AT3G15210;AT5G44210	ERF8;ERF4;ERF9	TraesCS6B02G331000	C5	AT1G36060	ERF055	Y1H
TraesCS1B02G326600	C1	AT1G53170;AT3G15210;AT5G44210	ERF8;ERF4;ERF9	TraesCS6A02G301900	C5	AT1G36060	ERF055	Y1H
TraesCS3A02G328000	C1	AT1G53170;AT3G15210;AT5G44210	ERF8;ERF4;ERF9	TraesCS6D02G281200	C6	AT1G36060	ERF055	Y1H
TraesCS3A02G328000	C1	AT1G53170;AT3G15210;AT5G44210	ERF8;ERF4;ERF9	TraesCS6B02G331000	C5	AT1G36060	ERF055	Y1H
TraesCS3A02G328000	C1	AT1G53170;AT3G15210;AT5G44210	ERF8;ERF4;ERF9	TraesCS6A02G301900	C5	AT1G36060	ERF055	Y1H
TraesCS1D02G314800	C1	AT1G53170;AT3G15210;AT5G44210	ERF8;ERF4;ERF9	TraesCS6D02G281200	C6	AT1G36060	ERF055	Y1H
TraesCS5A02G141500	C1	AT2G41070;AT3G56850	EEL;DPBF3	TraesCS7D02G161900	C2	AT1G19220;AT5G20730	ARF19;NPH4	Y1H
TraesCS5A02G141500	C1	AT2G41070;AT3G56850	EEL;DPBF3	TraesCS7B02G065800	C3	AT1G19220;AT5G20730	ARF19;NPH4	Y1H
TraesCS1D02G314800	C1	AT1G53170;AT3G15210;AT5G44210	ERF8;ERF4;ERF9	TraesCS6B02G331000	C5	AT1G36060	ERF055	Y1H
TraesCS1D02G314800	C1	AT1G53170;AT3G15210;AT5G44210	ERF8;ERF4;ERF9	TraesCS6A02G301900	C5	AT1G36060	ERF055	Y1H
TraesCS1A02G314300	C1	AT1G53170;AT3G15210;AT5G44210	ERF8;ERF4;ERF9	TraesCS6D02G281200	C6	AT1G36060	ERF055	Y1H
TraesCS2A02G591000	C5	AT1G47655;AT3G50410;AT5G66940	DOF1.6;DOF3.4;DOF5.8	TraesCS6B02G174400	C4	AT2G25180;AT4G31920	ARR12;ARR10	Y1H
TraesCS2A02G591000	C5	AT1G47655;AT3G50410;AT5G66940	DOF1.6;DOF3.4;DOF5.8	TraesCS6D02G135500	C4	AT2G25180;AT4G31920	ARR12;ARR10	Y1H
TraesCS2D02G444200	C5	AT1G16490;AT1G56160;AT1G79180;AT3G12820	MYB58;ATMYB72;ATMYB63;AtMYB10	TraesCS5D02G553300	C4	AT1G32330;AT3G02990;AT4G17750;AT5G16820	HSFA1D;HSFA1E;HSFA1A;HSFA1B	Y1H
TraesCS1A02G314300	C1	AT1G53170;AT3G15210;AT5G44210	ERF8;ERF4;ERF9	TraesCS6B02G331000	C5	AT1G36060	ERF055	Y1H
TraesCS1A02G314300	C1	AT1G53170;AT3G15210;AT5G44210	ERF8;ERF4;ERF9	TraesCS6A02G301900	C5	AT1G36060	ERF055	Y1H
TraesCS3D02G321500	C1	AT1G53170;AT3G15210;AT5G44210	ERF8;ERF4;ERF9	TraesCS6D02G281200	C6	AT1G36060	ERF055	Y1H
TraesCS2D02G563000	C5	AT1G47655;AT3G50410;AT5G66940	DOF1.6;DOF3.4;DOF5.8	TraesCS6B02G174400	C4	AT2G25180;AT4G31920	ARR12;ARR10	Y1H
TraesCS2D02G563000	C5	AT1G47655;AT3G50410;AT5G66940	DOF1.6;DOF3.4;DOF5.8	TraesCS6D02G135500	C4	AT2G25180;AT4G31920	ARR12;ARR10	Y1H
TraesCS3D02G321500	C1	AT1G53170;AT3G15210;AT5G44210	ERF8;ERF4;ERF9	TraesCS6B02G331000	C5	AT1G36060	ERF055	Y1H
TraesCS3D02G321500	C1	AT1G53170;AT3G15210;AT5G44210	ERF8;ERF4;ERF9	TraesCS6A02G301900	C5	AT1G36060	ERF055	Y1H
TraesCS2D02G165900	C6	AT1G14350;AT2G02820	MYB124;MYB88	TraesCS6D02G281200	C6	AT1G36060	ERF055	Y1H
TraesCS2D02G165900	C6	AT1G14350;AT2G02820	MYB124;MYB88	TraesCS6B02G331000	C5	AT1G36060	ERF055	Y1H
TraesCS2D02G165900	C6	AT1G14350;AT2G02820	MYB124;MYB88	TraesCS6A02G301900	C5	AT1G36060	ERF055	Y1H
TraesCS3D02G364900	C5	AT2G36270	ABI5	TraesCS4D02G267500	C6	AT1G36060	ERF055	Y1H
TraesCS2D02G165900	C6	AT1G14350;AT2G02820	MYB124;MYB88	TraesCS7A02G180900	C5	AT1G36060	ERF055	Y1H
TraesCS2A02G158900	C6	AT1G14350;AT2G02820	MYB124;MYB88	TraesCS6D02G281200	C6	AT1G36060	ERF055	Y1H
TraesCS2A02G158900	C6	AT1G14350;AT2G02820	MYB124;MYB88	TraesCS6B02G331000	C5	AT1G36060	ERF055	Y1H
TraesCS2A02G158900	C6	AT1G14350;AT2G02820	MYB124;MYB88	TraesCS6A02G301900	C5	AT1G36060	ERF055	Y1H
TraesCS2A02G158900	C6	AT1G14350;AT2G02820	MYB124;MYB88	TraesCS7A02G180900	C5	AT1G36060	ERF055	Y1H
TraesCS2B02G184500	C2	AT1G14350;AT2G02820	MYB124;MYB88	TraesCS6B02G331000	C5	AT1G36060	ERF055	Y1H
TraesCS2B02G184500	C2	AT1G14350;AT2G02820	MYB124;MYB88	TraesCS6A02G301900	C5	AT1G36060	ERF055	Y1H
TraesCS2A02G389400	C5	AT2G46680;AT3G61890	ATHB-7;ATHB-12	TraesCS6D02G135500	C4	AT2G25180;AT4G31920	ARR12;ARR10	Y1H
TraesCS2B02G184500	C2	AT1G14350;AT2G02820	MYB124;MYB88	TraesCS7A02G180900	C5	AT1G36060	ERF055	Y1H
TraesCS2B02G184500	C2	AT1G14350;AT2G02820	MYB124;MYB88	TraesCS6D02G281200	C6	AT1G36060	ERF055	Y1H
TraesCS7A02G464100	C6	AT1G56010;AT3G12977	NAC021;AT3G12977	TraesCS7A02G180900	C5	AT1G36060	ERF055	Y1H
TraesCS7A02G464100	C6	AT1G56010;AT3G12977	NAC021;AT3G12977	TraesCS4D02G267500	C6	AT1G36060	ERF055	Y1H
TraesCS7D02G452500	C3	AT1G56010;AT3G12977	NAC021;AT3G12977	TraesCS7D02G469200	C4	AT1G36060	ERF055	Y1H
TraesCS5A02G310500	C5	AT1G12610;AT1G63030;AT4G25470;AT4G25480;AT4G25490;AT5G51990	DREB1F;DREB1E;DREB1C;DREB1A;DREB1B;DREB1D	TraesCS4D02G332500	C3	AT3G24810;AT5G48820	KRP5;KRP3	Y1H
TraesCS5A02G310500	C5	AT1G12610;AT1G63030;AT4G25470;AT4G25480;AT4G25490;AT5G51990	DREB1F;DREB1E;DREB1C;DREB1A;DREB1B;DREB1D	TraesCS7A02G160800	C2	AT1G19220;AT5G20730	ARF19;NPH4	Y1H
TraesCS5A02G310500	C5	AT1G12610;AT1G63030;AT4G25470;AT4G25480;AT4G25490;AT5G51990	DREB1F;DREB1E;DREB1C;DREB1A;DREB1B;DREB1D	TraesCS7D02G161900	C2	AT1G19220;AT5G20730	ARF19;NPH4	Y1H
TraesCS2D02G387300	C5	AT2G46680;AT3G61890	ATHB-7;ATHB-12	TraesCS6D02G135500	C4	AT2G25180;AT4G31920	ARR12;ARR10	Y1H
TraesCS6D02G281200	C6	AT1G36060	ERF055	TraesCS6B02G174400	C4	AT2G25180;AT4G31920	ARR12;ARR10	review
TraesCS6D02G281200	C6	AT1G36060	ERF055	TraesCS6D02G135500	C4	AT2G25180;AT4G31920	ARR12;ARR10	review
TraesCS6B02G331000	C5	AT1G36060	ERF055	TraesCS6B02G174400	C4	AT2G25180;AT4G31920	ARR12;ARR10	review
TraesCS6B02G331000	C5	AT1G36060	ERF055	TraesCS6D02G135500	C4	AT2G25180;AT4G31920	ARR12;ARR10	review
TraesCS7D02G452500	C3	AT1G56010;AT3G12977	NAC021;AT3G12977	TraesCS7D02G182700	C3	AT1G36060	ERF055	Y1H
TraesCS7B02G365300	C3	AT1G56010;AT3G12977	NAC021;AT3G12977	TraesCS7D02G182700	C3	AT1G36060	ERF055	Y1H
TraesCS5D02G185300	C5	AT1G25470;AT1G68550;AT3G25890	ERF116;ERF118;ERF119	TraesCS7A02G160800	C2	AT1G19220;AT5G20730	ARF19;NPH4	Y1H
TraesCS5D02G185300	C5	AT1G25470;AT1G68550;AT3G25890	ERF116;ERF118;ERF119	TraesCS7D02G161900	C2	AT1G19220;AT5G20730	ARF19;NPH4	Y1H
TraesCS5D02G185300	C5	AT1G25470;AT1G68550;AT3G25890	ERF116;ERF118;ERF119	TraesCS6B02G174400	C4	AT2G25180;AT4G31920	ARR12;ARR10	Y1H
TraesCS5D02G185300	C5	AT1G25470;AT1G68550;AT3G25890	ERF116;ERF118;ERF119	TraesCS6D02G135500	C4	AT2G25180;AT4G31920	ARR12;ARR10	Y1H
TraesCS5D02G185300	C5	AT1G25470;AT1G68550;AT3G25890	ERF116;ERF118;ERF119	TraesCS5D02G243900	C4	AT1G46264	HSFB4	Y1H
TraesCS7D02G451700	C3	AT1G56010;AT3G12977	NAC021;AT3G12977	TraesCS7D02G469200	C4	AT1G36060	ERF055	Y1H
TraesCS7D02G451700	C3	AT1G56010;AT3G12977	NAC021;AT3G12977	TraesCS7D02G182700	C3	AT1G36060	ERF055	Y1H
TraesCS2B02G592600	C5	AT1G47655;AT3G50410;AT5G66940	DOF1.6;DOF3.4;DOF5.8	TraesCS6B02G174400	C4	AT2G25180;AT4G31920	ARR12;ARR10	Y1H
TraesCS2B02G592600	C5	AT1G47655;AT3G50410;AT5G66940	DOF1.6;DOF3.4;DOF5.8	TraesCS6D02G135500	C4	AT2G25180;AT4G31920	ARR12;ARR10	Y1H
TraesCS6B02G033000	C6	AT5G09330;AT5G64060	NAC082;anac103	TraesCS1D02G054000	C4	AT2G28610	WOX3	Y1H
TraesCS6B02G033000	C6	AT5G09330;AT5G64060	NAC082;anac103	TraesCS1B02G069000	C4	AT2G28610	WOX3	Y1H
TraesCS7A02G464800	C3	AT1G56010;AT3G12977	NAC021;AT3G12977	TraesCS7D02G469200	C4	AT1G36060	ERF055	Y1H
TraesCS7A02G464800	C3	AT1G56010;AT3G12977	NAC021;AT3G12977	TraesCS7D02G182700	C3	AT1G36060	ERF055	Y1H
TraesCS7D02G451700	C3	AT1G56010;AT3G12977	NAC021;AT3G12977	TraesCS7A02G180900	C5	AT1G36060	ERF055	Y1H
TraesCS7D02G052500	C1	AT1G12610;AT1G63030;AT4G25470;AT4G25480;AT4G25490;AT5G51990	DREB1F;DREB1E;DREB1C;DREB1A;DREB1B;DREB1D	TraesCS7A02G160800	C2	AT1G19220;AT5G20730	ARF19;NPH4	Y1H
TraesCS7D02G052500	C1	AT1G12610;AT1G63030;AT4G25470;AT4G25480;AT4G25490;AT5G51990	DREB1F;DREB1E;DREB1C;DREB1A;DREB1B;DREB1D	TraesCS7D02G161900	C2	AT1G19220;AT5G20730	ARF19;NPH4	Y1H
TraesCS7D02G052500	C1	AT1G12610;AT1G63030;AT4G25470;AT4G25480;AT4G25490;AT5G51990	DREB1F;DREB1E;DREB1C;DREB1A;DREB1B;DREB1D	TraesCS6B02G174400	C4	AT2G25180;AT4G31920	ARR12;ARR10	Y1H
TraesCS7D02G052500	C1	AT1G12610;AT1G63030;AT4G25470;AT4G25480;AT4G25490;AT5G51990	DREB1F;DREB1E;DREB1C;DREB1A;DREB1B;DREB1D	TraesCS6D02G135500	C4	AT2G25180;AT4G31920	ARR12;ARR10	Y1H
TraesCS7D02G052500	C1	AT1G12610;AT1G63030;AT4G25470;AT4G25480;AT4G25490;AT5G51990	DREB1F;DREB1E;DREB1C;DREB1A;DREB1B;DREB1D	TraesCS1B02G168900	C4	AT3G24810;AT5G48820	KRP5;KRP3	Y1H
TraesCS7D02G451700	C3	AT1G56010;AT3G12977	NAC021;AT3G12977	TraesCS4D02G267500	C6	AT1G36060	ERF055	Y1H
TraesCS5B02G141900	C6	AT1G76420	NAC031	TraesCS7A02G180900	C5	AT1G36060	ERF055	Y1H
TraesCS5B02G141900	C6	AT1G76420	NAC031	TraesCS4D02G267500	C6	AT1G36060	ERF055	Y1H
TraesCS6A02G301900	C5	AT1G36060	ERF055	TraesCS6B02G174400	C4	AT2G25180;AT4G31920	ARR12;ARR10	review
TraesCS6A02G301900	C5	AT1G36060	ERF055	TraesCS6D02G135500	C4	AT2G25180;AT4G31920	ARR12;ARR10	review
TraesCS5D02G148900	C6	AT1G76420	NAC031	TraesCS7A02G180900	C5	AT1G36060	ERF055	Y1H
TraesCS5D02G148900	C6	AT1G76420	NAC031	TraesCS4D02G267500	C6	AT1G36060	ERF055	Y1H
TraesCS5A02G143100	C6	AT1G76420	NAC031	TraesCS7A02G180900	C5	AT1G36060	ERF055	Y1H
TraesCS7D02G052600	C1	AT1G12610;AT1G63030;AT4G25470;AT4G25480;AT4G25490;AT5G51990	DREB1F;DREB1E;DREB1C;DREB1A;DREB1B;DREB1D	TraesCS7A02G160800	C2	AT1G19220;AT5G20730	ARF19;NPH4	Y1H
TraesCS7D02G052600	C1	AT1G12610;AT1G63030;AT4G25470;AT4G25480;AT4G25490;AT5G51990	DREB1F;DREB1E;DREB1C;DREB1A;DREB1B;DREB1D	TraesCS7D02G161900	C2	AT1G19220;AT5G20730	ARF19;NPH4	Y1H
TraesCS7D02G052600	C1	AT1G12610;AT1G63030;AT4G25470;AT4G25480;AT4G25490;AT5G51990	DREB1F;DREB1E;DREB1C;DREB1A;DREB1B;DREB1D	TraesCS6B02G174400	C4	AT2G25180;AT4G31920	ARR12;ARR10	Y1H
TraesCS7D02G052600	C1	AT1G12610;AT1G63030;AT4G25470;AT4G25480;AT4G25490;AT5G51990	DREB1F;DREB1E;DREB1C;DREB1A;DREB1B;DREB1D	TraesCS6D02G135500	C4	AT2G25180;AT4G31920	ARR12;ARR10	Y1H
TraesCS7D02G052600	C1	AT1G12610;AT1G63030;AT4G25470;AT4G25480;AT4G25490;AT5G51990	DREB1F;DREB1E;DREB1C;DREB1A;DREB1B;DREB1D	TraesCS1B02G168900	C4	AT3G24810;AT5G48820	KRP5;KRP3	Y1H
TraesCS5A02G143100	C6	AT1G76420	NAC031	TraesCS4D02G267500	C6	AT1G36060	ERF055	Y1H
TraesCS5A02G251800	C5	AT1G47655;AT3G50410;AT5G66940	DOF1.6;DOF3.4;DOF5.8	TraesCS6B02G174400	C4	AT2G25180;AT4G31920	ARR12;ARR10	Y1H
TraesCS5A02G251800	C5	AT1G47655;AT3G50410;AT5G66940	DOF1.6;DOF3.4;DOF5.8	TraesCS6D02G135500	C4	AT2G25180;AT4G31920	ARR12;ARR10	Y1H
TraesCS2B02G118500	C2	AT1G76420	NAC031	TraesCS7A02G180900	C5	AT1G36060	ERF055	Y1H
TraesCS4A02G226800	C5	AT1G14687	ZHD14	TraesCS4D02G332500	C3	AT3G24810;AT5G48820	KRP5;KRP3	Y1H
TraesCS2B02G407600	C5	AT2G46680;AT3G61890	ATHB-7;ATHB-12	TraesCS6D02G135500	C4	AT2G25180;AT4G31920	ARR12;ARR10	Y1H
TraesCS2D02G100900	C3	AT1G76420	NAC031	TraesCS7A02G180900	C5	AT1G36060	ERF055	Y1H
TraesCS4D02G086300	C5	AT1G14687	ZHD14	TraesCS4D02G332500	C3	AT3G24810;AT5G48820	KRP5;KRP3	Y1H
TraesCS2D02G100900	C3	AT1G76420	NAC031	TraesCS4D02G267500	C6	AT1G36060	ERF055	Y1H
TraesCS2A02G101400	C3	AT1G76420	NAC031	TraesCS7A02G180900	C5	AT1G36060	ERF055	Y1H
TraesCS2A02G101400	C3	AT1G76420	NAC031	TraesCS4D02G267500	C6	AT1G36060	ERF055	Y1H
TraesCS4A02G130600	C3	AT1G76420	NAC031	TraesCS7A02G180900	C5	AT1G36060	ERF055	Y1H
TraesCS4B02G089700	C5	AT1G14687	ZHD14	TraesCS4D02G332500	C3	AT3G24810;AT5G48820	KRP5;KRP3	Y1H
TraesCS4A02G130600	C3	AT1G76420	NAC031	TraesCS4D02G267500	C6	AT1G36060	ERF055	Y1H
TraesCS2B02G118500	C2	AT1G76420	NAC031	TraesCS4D02G267500	C6	AT1G36060	ERF055	Y1H
TraesCS5B02G178600	C5	AT1G25470;AT1G68550;AT3G25890	ERF116;ERF118;ERF119	TraesCS7A02G160800	C2	AT1G19220;AT5G20730	ARF19;NPH4	Y1H
TraesCS5B02G178600	C5	AT1G25470;AT1G68550;AT3G25890	ERF116;ERF118;ERF119	TraesCS7D02G161900	C2	AT1G19220;AT5G20730	ARF19;NPH4	Y1H
TraesCS5B02G178600	C5	AT1G25470;AT1G68550;AT3G25890	ERF116;ERF118;ERF119	TraesCS6B02G174400	C4	AT2G25180;AT4G31920	ARR12;ARR10	Y1H
TraesCS5B02G178600	C5	AT1G25470;AT1G68550;AT3G25890	ERF116;ERF118;ERF119	TraesCS6D02G135500	C4	AT2G25180;AT4G31920	ARR12;ARR10	Y1H
TraesCS5B02G178600	C5	AT1G25470;AT1G68550;AT3G25890	ERF116;ERF118;ERF119	TraesCS5D02G243900	C4	AT1G46264	HSFB4	Y1H
TraesCS2D02G100900	C3	AT1G76420	NAC031	TraesCS7D02G469200	C4	AT1G36060	ERF055	Y1H
TraesCS2D02G100900	C3	AT1G76420	NAC031	TraesCS7D02G182700	C3	AT1G36060	ERF055	Y1H
TraesCS2A02G101400	C3	AT1G76420	NAC031	TraesCS7D02G469200	C4	AT1G36060	ERF055	Y1H
TraesCS2A02G101400	C3	AT1G76420	NAC031	TraesCS7D02G182700	C3	AT1G36060	ERF055	Y1H
TraesCS4A02G130600	C3	AT1G76420	NAC031	TraesCS7D02G469200	C4	AT1G36060	ERF055	Y1H
TraesCS4A02G130600	C3	AT1G76420	NAC031	TraesCS7D02G182700	C3	AT1G36060	ERF055	Y1H
TraesCS4B02G292900	C5	AT1G72570	AIL1	TraesCS4D02G332500	C3	AT3G24810;AT5G48820	KRP5;KRP3	Y1H
TraesCS4B02G292900	C5	AT1G72570	AIL1	TraesCS7A02G160800	C2	AT1G19220;AT5G20730	ARF19;NPH4	Y1H
TraesCS4B02G292900	C5	AT1G72570	AIL1	TraesCS1B02G168900	C4	AT3G24810;AT5G48820	KRP5;KRP3	Y1H
TraesCS2B02G118200	C3	AT1G76420	NAC031	TraesCS7D02G469200	C4	AT1G36060	ERF055	Y1H
TraesCS2B02G118200	C3	AT1G76420	NAC031	TraesCS7D02G182700	C3	AT1G36060	ERF055	Y1H
TraesCS2D02G100600	C3	AT1G76420	NAC031	TraesCS7D02G182700	C3	AT1G36060	ERF055	Y1H
TraesCS2B02G118400	C3	AT1G76420	NAC031	TraesCS7D02G469200	C4	AT1G36060	ERF055	Y1H
TraesCS2B02G118400	C3	AT1G76420	NAC031	TraesCS7D02G182700	C3	AT1G36060	ERF055	Y1H
TraesCS2B02G118300	C3	AT1G76420	NAC031	TraesCS7D02G182700	C3	AT1G36060	ERF055	Y1H
TraesCS2D02G100700	C3	AT1G76420	NAC031	TraesCS7D02G182700	C3	AT1G36060	ERF055	Y1H
TraesCS4A02G011600	C5	AT1G72570	AIL1	TraesCS4D02G332500	C3	AT3G24810;AT5G48820	KRP5;KRP3	Y1H
TraesCS4A02G011600	C5	AT1G72570	AIL1	TraesCS7A02G160800	C2	AT1G19220;AT5G20730	ARF19;NPH4	Y1H
TraesCS4A02G011600	C5	AT1G72570	AIL1	TraesCS6D02G135500	C4	AT2G25180;AT4G31920	ARR12;ARR10	Y1H
TraesCS4A02G011600	C5	AT1G72570	AIL1	TraesCS5D02G553300	C4	AT1G32330;AT3G02990;AT4G17750;AT5G16820	HSFA1D;HSFA1E;HSFA1A;HSFA1B	Y1H
TraesCS4A02G011600	C5	AT1G72570	AIL1	TraesCS1B02G168900	C4	AT3G24810;AT5G48820	KRP5;KRP3	Y1H
TraesCS4B02G174000	C3	AT1G76420	NAC031	TraesCS7D02G469200	C4	AT1G36060	ERF055	Y1H
TraesCS4B02G174000	C3	AT1G76420	NAC031	TraesCS7D02G182700	C3	AT1G36060	ERF055	Y1H
TraesCS5A02G180800	C5	AT1G25470;AT1G68550;AT3G25890	ERF116;ERF118;ERF119	TraesCS7A02G160800	C2	AT1G19220;AT5G20730	ARF19;NPH4	Y1H
TraesCS5A02G180800	C5	AT1G25470;AT1G68550;AT3G25890	ERF116;ERF118;ERF119	TraesCS7D02G161900	C2	AT1G19220;AT5G20730	ARF19;NPH4	Y1H
TraesCS5A02G180800	C5	AT1G25470;AT1G68550;AT3G25890	ERF116;ERF118;ERF119	TraesCS6B02G174400	C4	AT2G25180;AT4G31920	ARR12;ARR10	Y1H
TraesCS5A02G180800	C5	AT1G25470;AT1G68550;AT3G25890	ERF116;ERF118;ERF119	TraesCS6D02G135500	C4	AT2G25180;AT4G31920	ARR12;ARR10	Y1H
TraesCS5A02G180800	C5	AT1G25470;AT1G68550;AT3G25890	ERF116;ERF118;ERF119	TraesCS5D02G243900	C4	AT1G46264	HSFB4	Y1H
TraesCS2B02G118500	C2	AT1G76420	NAC031	TraesCS7D02G469200	C4	AT1G36060	ERF055	Y1H
TraesCS2B02G118500	C2	AT1G76420	NAC031	TraesCS7D02G182700	C3	AT1G36060	ERF055	Y1H
TraesCS4B02G174000	C3	AT1G76420	NAC031	TraesCS7A02G180900	C5	AT1G36060	ERF055	Y1H
TraesCS4B02G174000	C3	AT1G76420	NAC031	TraesCS4D02G267500	C6	AT1G36060	ERF055	Y1H
TraesCS2A02G101000	C2	AT1G76420	NAC031	TraesCS7D02G182700	C3	AT1G36060	ERF055	Y1H
TraesCS4B02G385200	C3	AT5G60690	REV	TraesCS2D02G286300	C6	AT5G13330	ERF113	review
TraesCS4B02G385200	C3	AT5G60690	REV	TraesCS2A02G288000	C6	AT5G13330	ERF113	review
TraesCS5A02G549700	C4	AT5G60690	REV	TraesCS2D02G286300	C6	AT5G13330	ERF113	review
TraesCS5A02G549700	C4	AT5G60690	REV	TraesCS2A02G288000	C6	AT5G13330	ERF113	review
TraesCS3B02G404600	C5	AT2G36270	ABI5	TraesCS7A02G160800	C2	AT1G19220;AT5G20730	ARF19;NPH4	Y1H
TraesCS3B02G404600	C5	AT2G36270	ABI5	TraesCS7D02G161900	C2	AT1G19220;AT5G20730	ARF19;NPH4	Y1H
TraesCS3B02G404600	C5	AT2G36270	ABI5	TraesCS7B02G065800	C3	AT1G19220;AT5G20730	ARF19;NPH4	Y1H
TraesCS3B02G404600	C5	AT2G36270	ABI5	TraesCS7D02G182700	C3	AT1G36060	ERF055	Y1H
TraesCS3B02G404600	C5	AT2G36270	ABI5	TraesCS6B02G174400	C4	AT2G25180;AT4G31920	ARR12;ARR10	Y1H
TraesCS3B02G404600	C5	AT2G36270	ABI5	TraesCS5D02G243900	C4	AT1G46264	HSFB4	Y1H
TraesCS2A02G460700	C3	AT2G36080;AT3G11580;AT5G06250	ARF31;AT3G11580;AT5G06250	TraesCS5D02G553300	C4	AT1G32330;AT3G02990;AT4G17750;AT5G16820	HSFA1D;HSFA1E;HSFA1A;HSFA1B	Y1H
TraesCS2B02G482400	C3	AT2G36080;AT3G11580;AT5G06250	ARF31;AT3G11580;AT5G06250	TraesCS5D02G553300	C4	AT1G32330;AT3G02990;AT4G17750;AT5G16820	HSFA1D;HSFA1E;HSFA1A;HSFA1B	Y1H
TraesCS4B02G292900	C5	AT1G72570	AIL1	TraesCS5D02G393200	C1	AT2G26150	HSFA2	Y1H
TraesCS4A02G011600	C5	AT1G72570	AIL1	TraesCS5D02G393200	C1	AT2G26150	HSFA2	Y1H
TraesCS7A02G526500	C1	AT2G23290;AT3G50060;AT4G37260;AT5G67300	AtMYB70;MYB77;MYB73;MYB44	TraesCS5A02G383800	C1	AT2G26150	HSFA2	Y1H
TraesCS7A02G526500	C1	AT2G23290;AT3G50060;AT4G37260;AT5G67300	AtMYB70;MYB77;MYB73;MYB44	TraesCS5D02G393200	C1	AT2G26150	HSFA2	Y1H
TraesCS6B02G201700	C2	AT2G23290;AT3G50060;AT4G37260;AT5G67300	AtMYB70;MYB77;MYB73;MYB44	TraesCS5A02G383800	C1	AT2G26150	HSFA2	Y1H
TraesCS6B02G201700	C2	AT2G23290;AT3G50060;AT4G37260;AT5G67300	AtMYB70;MYB77;MYB73;MYB44	TraesCS5D02G393200	C1	AT2G26150	HSFA2	Y1H
TraesCS7A02G057800	C5	AT1G12610;AT1G63030;AT4G25470;AT4G25480;AT4G25490;AT5G51990	DREB1F;DREB1E;DREB1C;DREB1A;DREB1B;DREB1D	TraesCS7D02G161900	C2	AT1G19220;AT5G20730	ARF19;NPH4	Y1H
TraesCS7A02G057800	C5	AT1G12610;AT1G63030;AT4G25470;AT4G25480;AT4G25490;AT5G51990	DREB1F;DREB1E;DREB1C;DREB1A;DREB1B;DREB1D	TraesCS6B02G174400	C4	AT2G25180;AT4G31920	ARR12;ARR10	Y1H
TraesCS7A02G057800	C5	AT1G12610;AT1G63030;AT4G25470;AT4G25480;AT4G25490;AT5G51990	DREB1F;DREB1E;DREB1C;DREB1A;DREB1B;DREB1D	TraesCS6D02G135500	C4	AT2G25180;AT4G31920	ARR12;ARR10	Y1H
TraesCS7A02G057800	C5	AT1G12610;AT1G63030;AT4G25470;AT4G25480;AT4G25490;AT5G51990	DREB1F;DREB1E;DREB1C;DREB1A;DREB1B;DREB1D	TraesCS1B02G168900	C4	AT3G24810;AT5G48820	KRP5;KRP3	Y1H
TraesCS7A02G180900	C5	AT1G36060	ERF055	TraesCS6B02G174400	C4	AT2G25180;AT4G31920	ARR12;ARR10	review
TraesCS7A02G180900	C5	AT1G36060	ERF055	TraesCS6D02G135500	C4	AT2G25180;AT4G31920	ARR12;ARR10	review
TraesCS6D02G162900	C2	AT2G23290;AT3G50060;AT4G37260;AT5G67300	AtMYB70;MYB77;MYB73;MYB44	TraesCS5A02G383800	C1	AT2G26150	HSFA2	Y1H
TraesCS6D02G162900	C2	AT2G23290;AT3G50060;AT4G37260;AT5G67300	AtMYB70;MYB77;MYB73;MYB44	TraesCS5D02G393200	C1	AT2G26150	HSFA2	Y1H
TraesCS6A02G173800	C2	AT2G23290;AT3G50060;AT4G37260;AT5G67300	AtMYB70;MYB77;MYB73;MYB44	TraesCS5A02G383800	C1	AT2G26150	HSFA2	Y1H
TraesCS6A02G173800	C2	AT2G23290;AT3G50060;AT4G37260;AT5G67300	AtMYB70;MYB77;MYB73;MYB44	TraesCS5D02G393200	C1	AT2G26150	HSFA2	Y1H
TraesCS7A02G526600	C2	AT2G23290;AT3G50060;AT4G37260;AT5G67300	AtMYB70;MYB77;MYB73;MYB44	TraesCS5A02G383800	C1	AT2G26150	HSFA2	Y1H
TraesCS7A02G526600	C2	AT2G23290;AT3G50060;AT4G37260;AT5G67300	AtMYB70;MYB77;MYB73;MYB44	TraesCS5D02G393200	C1	AT2G26150	HSFA2	Y1H
TraesCS5B02G226100	C1	AT1G74650;AT3G28910;AT3G47600;AT5G62470	ATY13;MYB30;MYB94;MYB96	TraesCS5A02G383800	C1	AT2G26150	HSFA2	Y1H
TraesCS5B02G226100	C1	AT1G74650;AT3G28910;AT3G47600;AT5G62470	ATY13;MYB30;MYB94;MYB96	TraesCS5D02G393200	C1	AT2G26150	HSFA2	Y1H
TraesCS4A02G088400	C5	AT1G21910;AT1G44830;AT1G77640	ERF012;ERF014;ERF013	TraesCS4D02G332500	C3	AT3G24810;AT5G48820	KRP5;KRP3	Y1H
TraesCS4A02G088400	C5	AT1G21910;AT1G44830;AT1G77640	ERF012;ERF014;ERF013	TraesCS7A02G160800	C2	AT1G19220;AT5G20730	ARF19;NPH4	Y1H
TraesCS4A02G088400	C5	AT1G21910;AT1G44830;AT1G77640	ERF012;ERF014;ERF013	TraesCS7D02G161900	C2	AT1G19220;AT5G20730	ARF19;NPH4	Y1H
TraesCS4A02G088400	C5	AT1G21910;AT1G44830;AT1G77640	ERF012;ERF014;ERF013	TraesCS7D02G469200	C4	AT1G36060	ERF055	Y1H
TraesCS4A02G088400	C5	AT1G21910;AT1G44830;AT1G77640	ERF012;ERF014;ERF013	TraesCS7D02G182700	C3	AT1G36060	ERF055	Y1H
TraesCS4A02G088400	C5	AT1G21910;AT1G44830;AT1G77640	ERF012;ERF014;ERF013	TraesCS2B02G122500	C4	AT2G30470;AT4G32010	VAL1;VAL2	Y1H
TraesCS4A02G088400	C5	AT1G21910;AT1G44830;AT1G77640	ERF012;ERF014;ERF013	TraesCS6B02G174400	C4	AT2G25180;AT4G31920	ARR12;ARR10	Y1H
TraesCS4A02G088400	C5	AT1G21910;AT1G44830;AT1G77640	ERF012;ERF014;ERF013	TraesCS6D02G135500	C4	AT2G25180;AT4G31920	ARR12;ARR10	Y1H
TraesCS4A02G088400	C5	AT1G21910;AT1G44830;AT1G77640	ERF012;ERF014;ERF013	TraesCS1B02G168900	C4	AT3G24810;AT5G48820	KRP5;KRP3	Y1H
TraesCS4A02G088400	C5	AT1G21910;AT1G44830;AT1G77640	ERF012;ERF014;ERF013	TraesCS5D02G243900	C4	AT1G46264	HSFB4	Y1H
TraesCS2D02G163700	C1	AT1G74650;AT3G28910;AT3G47600;AT5G62470	ATY13;MYB30;MYB94;MYB96	TraesCS5A02G383800	C1	AT2G26150	HSFA2	Y1H
TraesCS2D02G163700	C1	AT1G74650;AT3G28910;AT3G47600;AT5G62470	ATY13;MYB30;MYB94;MYB96	TraesCS5D02G393200	C1	AT2G26150	HSFA2	Y1H
TraesCS2B02G183100	C1	AT1G74650;AT3G28910;AT3G47600;AT5G62470	ATY13;MYB30;MYB94;MYB96	TraesCS5A02G383800	C1	AT2G26150	HSFA2	Y1H
TraesCS2B02G183100	C1	AT1G74650;AT3G28910;AT3G47600;AT5G62470	ATY13;MYB30;MYB94;MYB96	TraesCS5D02G393200	C1	AT2G26150	HSFA2	Y1H
TraesCS2A02G157600	C1	AT1G74650;AT3G28910;AT3G47600;AT5G62470	ATY13;MYB30;MYB94;MYB96	TraesCS5A02G383800	C1	AT2G26150	HSFA2	Y1H
TraesCS2A02G157600	C1	AT1G74650;AT3G28910;AT3G47600;AT5G62470	ATY13;MYB30;MYB94;MYB96	TraesCS5D02G393200	C1	AT2G26150	HSFA2	Y1H
TraesCS7D02G170600	C1	AT1G21910;AT1G44830;AT1G77640	ERF012;ERF014;ERF013	TraesCS5A02G383800	C1	AT2G26150	HSFA2	Y1H
TraesCS7D02G170600	C1	AT1G21910;AT1G44830;AT1G77640	ERF012;ERF014;ERF013	TraesCS5D02G393200	C1	AT2G26150	HSFA2	Y1H
TraesCS2D02G286300	C6	AT5G13330	ERF113	TraesCS7A02G160800	C2	AT1G19220;AT5G20730	ARF19;NPH4	Y1H
TraesCS2D02G286300	C6	AT5G13330	ERF113	TraesCS7D02G161900	C2	AT1G19220;AT5G20730	ARF19;NPH4	Y1H
TraesCS2D02G286300	C6	AT5G13330	ERF113	TraesCS7D02G469200	C4	AT1G36060	ERF055	Y1H
TraesCS2D02G286300	C6	AT5G13330	ERF113	TraesCS7D02G182700	C3	AT1G36060	ERF055	Y1H
TraesCS2D02G286300	C6	AT5G13330	ERF113	TraesCS2B02G122500	C4	AT2G30470;AT4G32010	VAL1;VAL2	Y1H
TraesCS2D02G286300	C6	AT5G13330	ERF113	TraesCS6B02G174400	C4	AT2G25180;AT4G31920	ARR12;ARR10	Y1H
TraesCS2D02G286300	C6	AT5G13330	ERF113	TraesCS6D02G135500	C4	AT2G25180;AT4G31920	ARR12;ARR10	Y1H
TraesCS2D02G286300	C6	AT5G13330	ERF113	TraesCS5D02G243900	C4	AT1G46264	HSFB4	Y1H
TraesCS4B02G268100	C6	AT1G36060	ERF055	TraesCS6B02G174400	C4	AT2G25180;AT4G31920	ARR12;ARR10	review
TraesCS4B02G268100	C6	AT1G36060	ERF055	TraesCS6D02G135500	C4	AT2G25180;AT4G31920	ARR12;ARR10	review
TraesCS4A02G035400	C2	AT1G36060	ERF055	TraesCS6B02G174400	C4	AT2G25180;AT4G31920	ARR12;ARR10	review
TraesCS4A02G035400	C2	AT1G36060	ERF055	TraesCS6D02G135500	C4	AT2G25180;AT4G31920	ARR12;ARR10	review
TraesCS7B02G074500	C1	AT1G21910;AT1G44830;AT1G77640	ERF012;ERF014;ERF013	TraesCS5A02G383800	C1	AT2G26150	HSFA2	Y1H
TraesCS7B02G074500	C1	AT1G21910;AT1G44830;AT1G77640	ERF012;ERF014;ERF013	TraesCS5D02G393200	C1	AT2G26150	HSFA2	Y1H
TraesCS7A02G169300	C1	AT1G21910;AT1G44830;AT1G77640	ERF012;ERF014;ERF013	TraesCS5A02G383800	C1	AT2G26150	HSFA2	Y1H
TraesCS7A02G169300	C1	AT1G21910;AT1G44830;AT1G77640	ERF012;ERF014;ERF013	TraesCS5D02G393200	C1	AT2G26150	HSFA2	Y1H
TraesCS6D02G309600	C4	AT1G21910;AT1G44830;AT1G77640	ERF012;ERF014;ERF013	TraesCS5A02G383800	C1	AT2G26150	HSFA2	Y1H
TraesCS6D02G309600	C4	AT1G21910;AT1G44830;AT1G77640	ERF012;ERF014;ERF013	TraesCS5D02G393200	C1	AT2G26150	HSFA2	Y1H
TraesCS3B02G404300	C2	AT2G36270	ABI5	TraesCS7A02G160800	C2	AT1G19220;AT5G20730	ARF19;NPH4	Y1H
TraesCS3B02G404300	C2	AT2G36270	ABI5	TraesCS7D02G161900	C2	AT1G19220;AT5G20730	ARF19;NPH4	Y1H
TraesCS3B02G404300	C2	AT2G36270	ABI5	TraesCS7B02G065800	C3	AT1G19220;AT5G20730	ARF19;NPH4	Y1H
TraesCS3B02G404300	C2	AT2G36270	ABI5	TraesCS7D02G182700	C3	AT1G36060	ERF055	Y1H
TraesCS3B02G404300	C2	AT2G36270	ABI5	TraesCS6B02G174400	C4	AT2G25180;AT4G31920	ARR12;ARR10	Y1H
TraesCS3B02G404300	C2	AT2G36270	ABI5	TraesCS5D02G243900	C4	AT1G46264	HSFB4	Y1H
TraesCS3B02G357600	C1	AT1G28360	ERF12	TraesCS5A02G383800	C1	AT2G26150	HSFA2	Y1H
TraesCS3B02G357600	C1	AT1G28360	ERF12	TraesCS5D02G393200	C1	AT2G26150	HSFA2	Y1H
TraesCS1A02G266300	C6	AT5G09330;AT5G64060	NAC082;anac103	TraesCS1D02G054000	C4	AT2G28610	WOX3	Y1H
TraesCS1A02G266300	C6	AT5G09330;AT5G64060	NAC082;anac103	TraesCS1B02G069000	C4	AT2G28610	WOX3	Y1H
TraesCS3A02G328100	C1	AT1G28360	ERF12	TraesCS5A02G383800	C1	AT2G26150	HSFA2	Y1H
TraesCS3A02G328100	C1	AT1G28360	ERF12	TraesCS5D02G393200	C1	AT2G26150	HSFA2	Y1H
TraesCS5D02G553300	C4	AT1G32330;AT3G02990;AT4G17750;AT5G16820	HSFA1D;HSFA1E;HSFA1A;HSFA1B	TraesCS5A02G383800	C1	AT2G26150	HSFA2	Y1H
TraesCS5D02G553300	C4	AT1G32330;AT3G02990;AT4G17750;AT5G16820	HSFA1D;HSFA1E;HSFA1A;HSFA1B	TraesCS5D02G393200	C1	AT2G26150	HSFA2	Y1H
TraesCS5A02G383800	C1	AT2G26150	HSFA2	TraesCS5A02G383800	C1	AT2G26150	HSFA2	Y1H
TraesCS5A02G383800	C1	AT2G26150	HSFA2	TraesCS5D02G393200	C1	AT2G26150	HSFA2	Y1H
TraesCS5D02G393200	C1	AT2G26150	HSFA2	TraesCS5A02G383800	C1	AT2G26150	HSFA2	Y1H
TraesCS5D02G393200	C1	AT2G26150	HSFA2	TraesCS5D02G393200	C1	AT2G26150	HSFA2	Y1H
TraesCS2A02G288000	C6	AT5G13330	ERF113	TraesCS7A02G160800	C2	AT1G19220;AT5G20730	ARF19;NPH4	Y1H
TraesCS2A02G288000	C6	AT5G13330	ERF113	TraesCS7D02G161900	C2	AT1G19220;AT5G20730	ARF19;NPH4	Y1H
TraesCS2A02G288000	C6	AT5G13330	ERF113	TraesCS7D02G469200	C4	AT1G36060	ERF055	Y1H
TraesCS2A02G288000	C6	AT5G13330	ERF113	TraesCS7D02G182700	C3	AT1G36060	ERF055	Y1H
TraesCS2A02G288000	C6	AT5G13330	ERF113	TraesCS2B02G122500	C4	AT2G30470;AT4G32010	VAL1;VAL2	Y1H
TraesCS2A02G288000	C6	AT5G13330	ERF113	TraesCS6B02G174400	C4	AT2G25180;AT4G31920	ARR12;ARR10	Y1H
TraesCS2A02G288000	C6	AT5G13330	ERF113	TraesCS6D02G135500	C4	AT2G25180;AT4G31920	ARR12;ARR10	Y1H
TraesCS2A02G288000	C6	AT5G13330	ERF113	TraesCS5D02G243900	C4	AT1G46264	HSFB4	Y1H
TraesCS2A02G089300	C1	AT3G22830;AT3G51910;AT3G63350;AT5G43840	HSFA6B;HSFA7A;HSFA7B;HSFA6A	TraesCS5A02G383800	C1	AT2G26150	HSFA2	Y1H
TraesCS2A02G089300	C1	AT3G22830;AT3G51910;AT3G63350;AT5G43840	HSFA6B;HSFA7A;HSFA7B;HSFA6A	TraesCS5D02G393200	C1	AT2G26150	HSFA2	Y1H
TraesCS5B02G440700	C1	AT3G22830;AT3G51910;AT3G63350;AT5G43840	HSFA6B;HSFA7A;HSFA7B;HSFA6A	TraesCS5A02G383800	C1	AT2G26150	HSFA2	Y1H
TraesCS5B02G440700	C1	AT3G22830;AT3G51910;AT3G63350;AT5G43840	HSFA6B;HSFA7A;HSFA7B;HSFA6A	TraesCS5D02G393200	C1	AT2G26150	HSFA2	Y1H
TraesCS2B02G105100	C1	AT3G22830;AT3G51910;AT3G63350;AT5G43840	HSFA6B;HSFA7A;HSFA7B;HSFA6A	TraesCS5A02G383800	C1	AT2G26150	HSFA2	Y1H
TraesCS2B02G105100	C1	AT3G22830;AT3G51910;AT3G63350;AT5G43840	HSFA6B;HSFA7A;HSFA7B;HSFA6A	TraesCS5D02G393200	C1	AT2G26150	HSFA2	Y1H
TraesCS5D02G445100	C1	AT3G22830;AT3G51910;AT3G63350;AT5G43840	HSFA6B;HSFA7A;HSFA7B;HSFA6A	TraesCS5A02G383800	C1	AT2G26150	HSFA2	Y1H
TraesCS5D02G445100	C1	AT3G22830;AT3G51910;AT3G63350;AT5G43840	HSFA6B;HSFA7A;HSFA7B;HSFA6A	TraesCS5D02G393200	C1	AT2G26150	HSFA2	Y1H
TraesCS2B02G304800	C6	AT5G13330	ERF113	TraesCS7A02G160800	C2	AT1G19220;AT5G20730	ARF19;NPH4	Y1H
TraesCS2B02G304800	C6	AT5G13330	ERF113	TraesCS7D02G161900	C2	AT1G19220;AT5G20730	ARF19;NPH4	Y1H
TraesCS2B02G304800	C6	AT5G13330	ERF113	TraesCS7D02G469200	C4	AT1G36060	ERF055	Y1H
TraesCS2B02G304800	C6	AT5G13330	ERF113	TraesCS7D02G182700	C3	AT1G36060	ERF055	Y1H
TraesCS2B02G304800	C6	AT5G13330	ERF113	TraesCS2B02G122500	C4	AT2G30470;AT4G32010	VAL1;VAL2	Y1H
TraesCS2B02G304800	C6	AT5G13330	ERF113	TraesCS6B02G174400	C4	AT2G25180;AT4G31920	ARR12;ARR10	Y1H
TraesCS2B02G304800	C6	AT5G13330	ERF113	TraesCS6D02G135500	C4	AT2G25180;AT4G31920	ARR12;ARR10	Y1H
TraesCS2B02G304800	C6	AT5G13330	ERF113	TraesCS5D02G243900	C4	AT1G46264	HSFB4	Y1H
TraesCS4B02G278100	C1	AT3G22830;AT3G51910;AT3G63350;AT5G43840	HSFA6B;HSFA7A;HSFA7B;HSFA6A	TraesCS5A02G383800	C1	AT2G26150	HSFA2	Y1H
TraesCS4B02G278100	C1	AT3G22830;AT3G51910;AT3G63350;AT5G43840	HSFA6B;HSFA7A;HSFA7B;HSFA6A	TraesCS5D02G393200	C1	AT2G26150	HSFA2	Y1H
TraesCS4D02G276500	C1	AT3G22830;AT3G51910;AT3G63350;AT5G43840	HSFA6B;HSFA7A;HSFA7B;HSFA6A	TraesCS5A02G383800	C1	AT2G26150	HSFA2	Y1H
TraesCS4D02G276500	C1	AT3G22830;AT3G51910;AT3G63350;AT5G43840	HSFA6B;HSFA7A;HSFA7B;HSFA6A	TraesCS5D02G393200	C1	AT2G26150	HSFA2	Y1H
TraesCS1D02G382900	C1	AT3G22830;AT3G51910;AT3G63350;AT5G43840	HSFA6B;HSFA7A;HSFA7B;HSFA6A	TraesCS5A02G383800	C1	AT2G26150	HSFA2	Y1H
TraesCS1D02G382900	C1	AT3G22830;AT3G51910;AT3G63350;AT5G43840	HSFA6B;HSFA7A;HSFA7B;HSFA6A	TraesCS5D02G393200	C1	AT2G26150	HSFA2	Y1H
TraesCS7A02G464100	C6	AT1G56010;AT3G12977	NAC021;AT3G12977	TraesCS4D02G332500	C3	AT3G24810;AT5G48820	KRP5;KRP3	Y1H
TraesCS7A02G464100	C6	AT1G56010;AT3G12977	NAC021;AT3G12977	TraesCS7A02G160800	C2	AT1G19220;AT5G20730	ARF19;NPH4	Y1H
TraesCS7A02G464100	C6	AT1G56010;AT3G12977	NAC021;AT3G12977	TraesCS7D02G161900	C2	AT1G19220;AT5G20730	ARF19;NPH4	Y1H
TraesCS7A02G464100	C6	AT1G56010;AT3G12977	NAC021;AT3G12977	TraesCS7B02G065800	C3	AT1G19220;AT5G20730	ARF19;NPH4	Y1H
TraesCS7A02G464100	C6	AT1G56010;AT3G12977	NAC021;AT3G12977	TraesCS7D02G469200	C4	AT1G36060	ERF055	Y1H
TraesCS7A02G464100	C6	AT1G56010;AT3G12977	NAC021;AT3G12977	TraesCS7D02G182700	C3	AT1G36060	ERF055	Y1H
TraesCS7A02G464100	C6	AT1G56010;AT3G12977	NAC021;AT3G12977	TraesCS2B02G122500	C4	AT2G30470;AT4G32010	VAL1;VAL2	Y1H
TraesCS1B02G396000	C1	AT3G22830;AT3G51910;AT3G63350;AT5G43840	HSFA6B;HSFA7A;HSFA7B;HSFA6A	TraesCS5A02G383800	C1	AT2G26150	HSFA2	Y1H
TraesCS1B02G396000	C1	AT3G22830;AT3G51910;AT3G63350;AT5G43840	HSFA6B;HSFA7A;HSFA7B;HSFA6A	TraesCS5D02G393200	C1	AT2G26150	HSFA2	Y1H
TraesCS1A02G375600	C1	AT3G22830;AT3G51910;AT3G63350;AT5G43840	HSFA6B;HSFA7A;HSFA7B;HSFA6A	TraesCS5A02G383800	C1	AT2G26150	HSFA2	Y1H
TraesCS1A02G375600	C1	AT3G22830;AT3G51910;AT3G63350;AT5G43840	HSFA6B;HSFA7A;HSFA7B;HSFA6A	TraesCS5D02G393200	C1	AT2G26150	HSFA2	Y1H
TraesCS5A02G437900	C1	AT3G22830;AT3G51910;AT3G63350;AT5G43840	HSFA6B;HSFA7A;HSFA7B;HSFA6A	TraesCS5A02G383800	C1	AT2G26150	HSFA2	Y1H
TraesCS2D02G165900	C6	AT1G14350;AT2G02820	MYB124;MYB88	TraesCS4D02G332500	C3	AT3G24810;AT5G48820	KRP5;KRP3	Y1H
TraesCS2D02G165900	C6	AT1G14350;AT2G02820	MYB124;MYB88	TraesCS7B02G065800	C3	AT1G19220;AT5G20730	ARF19;NPH4	Y1H
TraesCS2D02G165900	C6	AT1G14350;AT2G02820	MYB124;MYB88	TraesCS7D02G182700	C3	AT1G36060	ERF055	Y1H
TraesCS2D02G165900	C6	AT1G14350;AT2G02820	MYB124;MYB88	TraesCS5D02G206200	C4	AT1G70210	CYCD1-1	Y1H
TraesCS2D02G165900	C6	AT1G14350;AT2G02820	MYB124;MYB88	TraesCS5D02G553300	C4	AT1G32330;AT3G02990;AT4G17750;AT5G16820	HSFA1D;HSFA1E;HSFA1A;HSFA1B	Y1H
TraesCS2D02G165900	C6	AT1G14350;AT2G02820	MYB124;MYB88	TraesCS1B02G168900	C4	AT3G24810;AT5G48820	KRP5;KRP3	Y1H
TraesCS5B02G249800	C6	AT1G47655;AT3G50410;AT5G66940	DOF1.6;DOF3.4;DOF5.8	TraesCS6B02G174400	C4	AT2G25180;AT4G31920	ARR12;ARR10	Y1H
TraesCS5B02G249800	C6	AT1G47655;AT3G50410;AT5G66940	DOF1.6;DOF3.4;DOF5.8	TraesCS6D02G135500	C4	AT2G25180;AT4G31920	ARR12;ARR10	Y1H
TraesCS4D02G267500	C6	AT1G36060	ERF055	TraesCS6B02G174400	C4	AT2G25180;AT4G31920	ARR12;ARR10	review
TraesCS4D02G267500	C6	AT1G36060	ERF055	TraesCS6D02G135500	C4	AT2G25180;AT4G31920	ARR12;ARR10	review
TraesCS5A02G437900	C1	AT3G22830;AT3G51910;AT3G63350;AT5G43840	HSFA6B;HSFA7A;HSFA7B;HSFA6A	TraesCS5D02G393200	C1	AT2G26150	HSFA2	Y1H
TraesCS5B02G236400	C5	AT4G36990	HSFB1	TraesCS5A02G383800	C1	AT2G26150	HSFA2	Y1H
TraesCS5B02G236400	C5	AT4G36990	HSFB1	TraesCS5D02G393200	C1	AT2G26150	HSFA2	Y1H
TraesCS5A02G237900	C5	AT4G36990	HSFB1	TraesCS5A02G383800	C1	AT2G26150	HSFA2	Y1H
TraesCS5A02G237900	C5	AT4G36990	HSFB1	TraesCS5D02G393200	C1	AT2G26150	HSFA2	Y1H
TraesCS5D02G244800	C5	AT4G36990	HSFB1	TraesCS5A02G383800	C1	AT2G26150	HSFA2	Y1H
TraesCS2A02G158900	C6	AT1G14350;AT2G02820	MYB124;MYB88	TraesCS7B02G065800	C3	AT1G19220;AT5G20730	ARF19;NPH4	Y1H
TraesCS2A02G158900	C6	AT1G14350;AT2G02820	MYB124;MYB88	TraesCS7D02G182700	C3	AT1G36060	ERF055	Y1H
TraesCS2A02G158900	C6	AT1G14350;AT2G02820	MYB124;MYB88	TraesCS5D02G206200	C4	AT1G70210	CYCD1-1	Y1H
TraesCS2A02G158900	C6	AT1G14350;AT2G02820	MYB124;MYB88	TraesCS5D02G553300	C4	AT1G32330;AT3G02990;AT4G17750;AT5G16820	HSFA1D;HSFA1E;HSFA1A;HSFA1B	Y1H
TraesCS2A02G158900	C6	AT1G14350;AT2G02820	MYB124;MYB88	TraesCS1B02G168900	C4	AT3G24810;AT5G48820	KRP5;KRP3	Y1H
TraesCS5D02G244800	C5	AT4G36990	HSFB1	TraesCS5D02G393200	C1	AT2G26150	HSFA2	Y1H
TraesCS3D02G531900	C2	AT3G46640;AT5G59570	PCL1;BOA	TraesCS5A02G383800	C1	AT2G26150	HSFA2	Y1H
TraesCS3A02G371800	C1	AT2G36270	ABI5	TraesCS5A02G237900	C5	AT4G36990	HSFB1	Y1H
TraesCS3A02G371800	C1	AT2G36270	ABI5	TraesCS5D02G244800	C5	AT4G36990	HSFB1	Y1H
TraesCS3D02G364900	C5	AT2G36270	ABI5	TraesCS5A02G237900	C5	AT4G36990	HSFB1	Y1H
TraesCS3D02G364900	C5	AT2G36270	ABI5	TraesCS5D02G244800	C5	AT4G36990	HSFB1	Y1H
TraesCS2B02G184500	C2	AT1G14350;AT2G02820	MYB124;MYB88	TraesCS7B02G065800	C3	AT1G19220;AT5G20730	ARF19;NPH4	Y1H
TraesCS2B02G184500	C2	AT1G14350;AT2G02820	MYB124;MYB88	TraesCS7D02G182700	C3	AT1G36060	ERF055	Y1H
TraesCS2B02G184500	C2	AT1G14350;AT2G02820	MYB124;MYB88	TraesCS5D02G206200	C4	AT1G70210	CYCD1-1	Y1H
TraesCS2B02G184500	C2	AT1G14350;AT2G02820	MYB124;MYB88	TraesCS5D02G553300	C4	AT1G32330;AT3G02990;AT4G17750;AT5G16820	HSFA1D;HSFA1E;HSFA1A;HSFA1B	Y1H
TraesCS2B02G184500	C2	AT1G14350;AT2G02820	MYB124;MYB88	TraesCS1B02G168900	C4	AT3G24810;AT5G48820	KRP5;KRP3	Y1H
TraesCS3B02G404600	C5	AT2G36270	ABI5	TraesCS5A02G237900	C5	AT4G36990	HSFB1	Y1H
TraesCS3B02G404600	C5	AT2G36270	ABI5	TraesCS5D02G244800	C5	AT4G36990	HSFB1	Y1H
TraesCS3B02G404300	C2	AT2G36270	ABI5	TraesCS5A02G237900	C5	AT4G36990	HSFB1	Y1H
TraesCS3B02G404300	C2	AT2G36270	ABI5	TraesCS5D02G244800	C5	AT4G36990	HSFB1	Y1H
TraesCS4B02G292900	C5	AT1G72570	AIL1	TraesCS5B02G236400	C5	AT4G36990	HSFB1	Y1H
TraesCS5B02G141900	C6	AT1G76420	NAC031	TraesCS7A02G160800	C2	AT1G19220;AT5G20730	ARF19;NPH4	Y1H
TraesCS5B02G141900	C6	AT1G76420	NAC031	TraesCS7D02G161900	C2	AT1G19220;AT5G20730	ARF19;NPH4	Y1H
TraesCS5B02G141900	C6	AT1G76420	NAC031	TraesCS7B02G065800	C3	AT1G19220;AT5G20730	ARF19;NPH4	Y1H
TraesCS5B02G141900	C6	AT1G76420	NAC031	TraesCS7D02G469200	C4	AT1G36060	ERF055	Y1H
TraesCS5B02G141900	C6	AT1G76420	NAC031	TraesCS7D02G182700	C3	AT1G36060	ERF055	Y1H
TraesCS5B02G141900	C6	AT1G76420	NAC031	TraesCS2B02G122500	C4	AT2G30470;AT4G32010	VAL1;VAL2	Y1H
TraesCS4A02G011600	C5	AT1G72570	AIL1	TraesCS5B02G236400	C5	AT4G36990	HSFB1	Y1H
TraesCS6B02G451300	C1	AT3G10480;AT3G10490;AT3G10500;AT5G04410	ANAC050;ANAC052;NAC053;NAC078	TraesCS5B02G236400	C5	AT4G36990	HSFB1	Y1H
TraesCS6B02G451300	C1	AT3G10480;AT3G10490;AT3G10500;AT5G04410	ANAC050;ANAC052;NAC053;NAC078	TraesCS5A02G237900	C5	AT4G36990	HSFB1	Y1H
TraesCS6B02G451300	C1	AT3G10480;AT3G10490;AT3G10500;AT5G04410	ANAC050;ANAC052;NAC053;NAC078	TraesCS5D02G244800	C5	AT4G36990	HSFB1	Y1H
TraesCSU02G135000	C4	AT3G10480;AT3G10490;AT3G10500;AT5G04410	ANAC050;ANAC052;NAC053;NAC078	TraesCS5B02G236400	C5	AT4G36990	HSFB1	Y1H
TraesCSU02G135000	C4	AT3G10480;AT3G10490;AT3G10500;AT5G04410	ANAC050;ANAC052;NAC053;NAC078	TraesCS5A02G237900	C5	AT4G36990	HSFB1	Y1H
TraesCSU02G135000	C4	AT3G10480;AT3G10490;AT3G10500;AT5G04410	ANAC050;ANAC052;NAC053;NAC078	TraesCS5D02G244800	C5	AT4G36990	HSFB1	Y1H
TraesCS5D02G134700	C5	AT2G36080;AT3G11580;AT5G06250	ARF31;AT3G11580;AT5G06250	TraesCS5D02G244800	C5	AT4G36990	HSFB1	Y1H
TraesCS5A02G127100	C5	AT2G36080;AT3G11580;AT5G06250	ARF31;AT3G11580;AT5G06250	TraesCS5D02G244800	C5	AT4G36990	HSFB1	Y1H
TraesCS6B02G201700	C2	AT2G23290;AT3G50060;AT4G37260;AT5G67300	AtMYB70;MYB77;MYB73;MYB44	TraesCS5B02G236400	C5	AT4G36990	HSFB1	Y1H
TraesCS6B02G201700	C2	AT2G23290;AT3G50060;AT4G37260;AT5G67300	AtMYB70;MYB77;MYB73;MYB44	TraesCS5A02G237900	C5	AT4G36990	HSFB1	Y1H
TraesCS6B02G201700	C2	AT2G23290;AT3G50060;AT4G37260;AT5G67300	AtMYB70;MYB77;MYB73;MYB44	TraesCS5D02G244800	C5	AT4G36990	HSFB1	Y1H
TraesCS6D02G162900	C2	AT2G23290;AT3G50060;AT4G37260;AT5G67300	AtMYB70;MYB77;MYB73;MYB44	TraesCS5B02G236400	C5	AT4G36990	HSFB1	Y1H
TraesCS6D02G162900	C2	AT2G23290;AT3G50060;AT4G37260;AT5G67300	AtMYB70;MYB77;MYB73;MYB44	TraesCS5A02G237900	C5	AT4G36990	HSFB1	Y1H
TraesCS6D02G162900	C2	AT2G23290;AT3G50060;AT4G37260;AT5G67300	AtMYB70;MYB77;MYB73;MYB44	TraesCS5D02G244800	C5	AT4G36990	HSFB1	Y1H
TraesCS6B02G201700	C2	AT2G23290;AT3G50060;AT4G37260;AT5G67300	AtMYB70;MYB77;MYB73;MYB44	TraesCS7B02G065800	C3	AT1G19220;AT5G20730	ARF19;NPH4	Y1H
TraesCS6B02G201700	C2	AT2G23290;AT3G50060;AT4G37260;AT5G67300	AtMYB70;MYB77;MYB73;MYB44	TraesCS7D02G182700	C3	AT1G36060	ERF055	Y1H
TraesCS6B02G201700	C2	AT2G23290;AT3G50060;AT4G37260;AT5G67300	AtMYB70;MYB77;MYB73;MYB44	TraesCS5D02G553300	C4	AT1G32330;AT3G02990;AT4G17750;AT5G16820	HSFA1D;HSFA1E;HSFA1A;HSFA1B	Y1H
TraesCS6B02G201700	C2	AT2G23290;AT3G50060;AT4G37260;AT5G67300	AtMYB70;MYB77;MYB73;MYB44	TraesCS1B02G168900	C4	AT3G24810;AT5G48820	KRP5;KRP3	Y1H
TraesCS6A02G173800	C2	AT2G23290;AT3G50060;AT4G37260;AT5G67300	AtMYB70;MYB77;MYB73;MYB44	TraesCS5B02G236400	C5	AT4G36990	HSFB1	Y1H
TraesCS6A02G173800	C2	AT2G23290;AT3G50060;AT4G37260;AT5G67300	AtMYB70;MYB77;MYB73;MYB44	TraesCS5A02G237900	C5	AT4G36990	HSFB1	Y1H
TraesCS1B02G277300	C6	AT5G09330;AT5G64060	NAC082;anac103	TraesCS1D02G054000	C4	AT2G28610	WOX3	Y1H
TraesCS1B02G277300	C6	AT5G09330;AT5G64060	NAC082;anac103	TraesCS1B02G069000	C4	AT2G28610	WOX3	Y1H
TraesCS6A02G173800	C2	AT2G23290;AT3G50060;AT4G37260;AT5G67300	AtMYB70;MYB77;MYB73;MYB44	TraesCS5D02G244800	C5	AT4G36990	HSFB1	Y1H
TraesCS5B02G310800	C1	AT1G12610;AT1G63030;AT4G25470;AT4G25480;AT4G25490;AT5G51990	DREB1F;DREB1E;DREB1C;DREB1A;DREB1B;DREB1D	TraesCS5A02G237900	C5	AT4G36990	HSFB1	Y1H
TraesCSU02G137200	C6	AT5G09330;AT5G64060	NAC082;anac103	TraesCS1D02G054000	C4	AT2G28610	WOX3	Y1H
TraesCSU02G137200	C6	AT5G09330;AT5G64060	NAC082;anac103	TraesCS1B02G069000	C4	AT2G28610	WOX3	Y1H
TraesCS4A02G433200	C1	AT1G12610;AT1G63030;AT4G25470;AT4G25480;AT4G25490;AT5G51990	DREB1F;DREB1E;DREB1C;DREB1A;DREB1B;DREB1D	TraesCS5A02G237900	C5	AT4G36990	HSFB1	Y1H
TraesCS7D02G052400	C1	AT1G12610;AT1G63030;AT4G25470;AT4G25480;AT4G25490;AT5G51990	DREB1F;DREB1E;DREB1C;DREB1A;DREB1B;DREB1D	TraesCS5A02G237900	C5	AT4G36990	HSFB1	Y1H
TraesCS7A02G057700	C1	AT1G12610;AT1G63030;AT4G25470;AT4G25480;AT4G25490;AT5G51990	DREB1F;DREB1E;DREB1C;DREB1A;DREB1B;DREB1D	TraesCS5A02G237900	C5	AT4G36990	HSFB1	Y1H
TraesCS7D02G052500	C1	AT1G12610;AT1G63030;AT4G25470;AT4G25480;AT4G25490;AT5G51990	DREB1F;DREB1E;DREB1C;DREB1A;DREB1B;DREB1D	TraesCS5A02G237900	C5	AT4G36990	HSFB1	Y1H
TraesCS5A02G310500	C5	AT1G12610;AT1G63030;AT4G25470;AT4G25480;AT4G25490;AT5G51990	DREB1F;DREB1E;DREB1C;DREB1A;DREB1B;DREB1D	TraesCS5A02G237900	C5	AT4G36990	HSFB1	Y1H
TraesCS7D02G052600	C1	AT1G12610;AT1G63030;AT4G25470;AT4G25480;AT4G25490;AT5G51990	DREB1F;DREB1E;DREB1C;DREB1A;DREB1B;DREB1D	TraesCS5A02G237900	C5	AT4G36990	HSFB1	Y1H
TraesCS5B02G311900	C5	AT1G12610;AT1G63030;AT4G25470;AT4G25480;AT4G25490;AT5G51990	DREB1F;DREB1E;DREB1C;DREB1A;DREB1B;DREB1D	TraesCS5A02G237900	C5	AT4G36990	HSFB1	Y1H
TraesCS7A02G057800	C5	AT1G12610;AT1G63030;AT4G25470;AT4G25480;AT4G25490;AT5G51990	DREB1F;DREB1E;DREB1C;DREB1A;DREB1B;DREB1D	TraesCS5A02G237900	C5	AT4G36990	HSFB1	Y1H
TraesCS5D02G317400	C4	AT1G12610;AT1G63030;AT4G25470;AT4G25480;AT4G25490;AT5G51990	DREB1F;DREB1E;DREB1C;DREB1A;DREB1B;DREB1D	TraesCS5A02G237900	C5	AT4G36990	HSFB1	Y1H
TraesCS1B02G235100	C1	AT3G11020;AT5G05410	DREB2B;DREB2A	TraesCS5A02G237900	C5	AT4G36990	HSFB1	Y1H
TraesCS1D02G223600	C1	AT3G11020;AT5G05410	DREB2B;DREB2A	TraesCS5A02G237900	C5	AT4G36990	HSFB1	Y1H
TraesCS1A02G221900	C1	AT3G11020;AT5G05410	DREB2B;DREB2A	TraesCS5A02G237900	C5	AT4G36990	HSFB1	Y1H
TraesCS3A02G099200	C4	AT3G11020;AT5G05410	DREB2B;DREB2A	TraesCS5A02G237900	C5	AT4G36990	HSFB1	Y1H
TraesCS7A02G169300	C1	AT1G21910;AT1G44830;AT1G77640	ERF012;ERF014;ERF013	TraesCS5A02G237900	C5	AT4G36990	HSFB1	Y1H
TraesCS4A02G088400	C5	AT1G21910;AT1G44830;AT1G77640	ERF012;ERF014;ERF013	TraesCS5A02G237900	C5	AT4G36990	HSFB1	Y1H
TraesCS6D02G162900	C2	AT2G23290;AT3G50060;AT4G37260;AT5G67300	AtMYB70;MYB77;MYB73;MYB44	TraesCS7B02G065800	C3	AT1G19220;AT5G20730	ARF19;NPH4	Y1H
TraesCS6D02G162900	C2	AT2G23290;AT3G50060;AT4G37260;AT5G67300	AtMYB70;MYB77;MYB73;MYB44	TraesCS7D02G182700	C3	AT1G36060	ERF055	Y1H
TraesCS6D02G162900	C2	AT2G23290;AT3G50060;AT4G37260;AT5G67300	AtMYB70;MYB77;MYB73;MYB44	TraesCS5D02G553300	C4	AT1G32330;AT3G02990;AT4G17750;AT5G16820	HSFA1D;HSFA1E;HSFA1A;HSFA1B	Y1H
TraesCS6D02G162900	C2	AT2G23290;AT3G50060;AT4G37260;AT5G67300	AtMYB70;MYB77;MYB73;MYB44	TraesCS1B02G168900	C4	AT3G24810;AT5G48820	KRP5;KRP3	Y1H
TraesCS2D02G286300	C6	AT5G13330	ERF113	TraesCS5A02G237900	C5	AT4G36990	HSFB1	Y1H
TraesCS2A02G288000	C6	AT5G13330	ERF113	TraesCS5A02G237900	C5	AT4G36990	HSFB1	Y1H
TraesCS2B02G304800	C6	AT5G13330	ERF113	TraesCS5A02G237900	C5	AT4G36990	HSFB1	Y1H
TraesCS3B02G357500	C1	AT1G53170;AT3G15210;AT5G44210	ERF8;ERF4;ERF9	TraesCS5A02G237900	C5	AT4G36990	HSFB1	Y1H
TraesCS1B02G326600	C1	AT1G53170;AT3G15210;AT5G44210	ERF8;ERF4;ERF9	TraesCS5A02G237900	C5	AT4G36990	HSFB1	Y1H
TraesCS3A02G328000	C1	AT1G53170;AT3G15210;AT5G44210	ERF8;ERF4;ERF9	TraesCS5A02G237900	C5	AT4G36990	HSFB1	Y1H
TraesCS1D02G314800	C1	AT1G53170;AT3G15210;AT5G44210	ERF8;ERF4;ERF9	TraesCS5A02G237900	C5	AT4G36990	HSFB1	Y1H
TraesCS5D02G148900	C6	AT1G76420	NAC031	TraesCS7B02G065800	C3	AT1G19220;AT5G20730	ARF19;NPH4	Y1H
TraesCS5D02G148900	C6	AT1G76420	NAC031	TraesCS7D02G469200	C4	AT1G36060	ERF055	Y1H
TraesCS5D02G148900	C6	AT1G76420	NAC031	TraesCS7D02G182700	C3	AT1G36060	ERF055	Y1H
TraesCS5D02G148900	C6	AT1G76420	NAC031	TraesCS2B02G122500	C4	AT2G30470;AT4G32010	VAL1;VAL2	Y1H
TraesCS1A02G314300	C1	AT1G53170;AT3G15210;AT5G44210	ERF8;ERF4;ERF9	TraesCS5A02G237900	C5	AT4G36990	HSFB1	Y1H
TraesCS3D02G321500	C1	AT1G53170;AT3G15210;AT5G44210	ERF8;ERF4;ERF9	TraesCS5A02G237900	C5	AT4G36990	HSFB1	Y1H
TraesCS5D02G553300	C4	AT1G32330;AT3G02990;AT4G17750;AT5G16820	HSFA1D;HSFA1E;HSFA1A;HSFA1B	TraesCS5A02G237900	C5	AT4G36990	HSFB1	Y1H
TraesCS5D02G553300	C4	AT1G32330;AT3G02990;AT4G17750;AT5G16820	HSFA1D;HSFA1E;HSFA1A;HSFA1B	TraesCS5D02G244800	C5	AT4G36990	HSFB1	Y1H
TraesCS2A02G089300	C1	AT3G22830;AT3G51910;AT3G63350;AT5G43840	HSFA6B;HSFA7A;HSFA7B;HSFA6A	TraesCS5A02G237900	C5	AT4G36990	HSFB1	Y1H
TraesCS5B02G440700	C1	AT3G22830;AT3G51910;AT3G63350;AT5G43840	HSFA6B;HSFA7A;HSFA7B;HSFA6A	TraesCS5A02G237900	C5	AT4G36990	HSFB1	Y1H
TraesCS5B02G440700	C1	AT3G22830;AT3G51910;AT3G63350;AT5G43840	HSFA6B;HSFA7A;HSFA7B;HSFA6A	TraesCS5D02G244800	C5	AT4G36990	HSFB1	Y1H
TraesCS5A02G143100	C6	AT1G76420	NAC031	TraesCS7B02G065800	C3	AT1G19220;AT5G20730	ARF19;NPH4	Y1H
TraesCS5A02G143100	C6	AT1G76420	NAC031	TraesCS7D02G469200	C4	AT1G36060	ERF055	Y1H
TraesCS5A02G143100	C6	AT1G76420	NAC031	TraesCS7D02G182700	C3	AT1G36060	ERF055	Y1H
TraesCS5A02G143100	C6	AT1G76420	NAC031	TraesCS2B02G122500	C4	AT2G30470;AT4G32010	VAL1;VAL2	Y1H
TraesCS2B02G105100	C1	AT3G22830;AT3G51910;AT3G63350;AT5G43840	HSFA6B;HSFA7A;HSFA7B;HSFA6A	TraesCS5A02G237900	C5	AT4G36990	HSFB1	Y1H
TraesCS2B02G105100	C1	AT3G22830;AT3G51910;AT3G63350;AT5G43840	HSFA6B;HSFA7A;HSFA7B;HSFA6A	TraesCS5D02G244800	C5	AT4G36990	HSFB1	Y1H
TraesCS1D02G266500	C6	AT5G09330;AT5G64060	NAC082;anac103	TraesCS1D02G054000	C4	AT2G28610	WOX3	Y1H
TraesCS1D02G266500	C6	AT5G09330;AT5G64060	NAC082;anac103	TraesCS1B02G069000	C4	AT2G28610	WOX3	Y1H
TraesCS1D02G382900	C1	AT3G22830;AT3G51910;AT3G63350;AT5G43840	HSFA6B;HSFA7A;HSFA7B;HSFA6A	TraesCS5A02G237900	C5	AT4G36990	HSFB1	Y1H
TraesCS1D02G382900	C1	AT3G22830;AT3G51910;AT3G63350;AT5G43840	HSFA6B;HSFA7A;HSFA7B;HSFA6A	TraesCS5D02G244800	C5	AT4G36990	HSFB1	Y1H
TraesCS7B02G364600	C3	AT1G56010;AT3G12977	NAC021;AT3G12977	TraesCS7D02G182700	C3	AT1G36060	ERF055	Y1H
TraesCS1B02G396000	C1	AT3G22830;AT3G51910;AT3G63350;AT5G43840	HSFA6B;HSFA7A;HSFA7B;HSFA6A	TraesCS5A02G237900	C5	AT4G36990	HSFB1	Y1H
TraesCS1B02G396000	C1	AT3G22830;AT3G51910;AT3G63350;AT5G43840	HSFA6B;HSFA7A;HSFA7B;HSFA6A	TraesCS5D02G244800	C5	AT4G36990	HSFB1	Y1H
TraesCS1A02G375600	C1	AT3G22830;AT3G51910;AT3G63350;AT5G43840	HSFA6B;HSFA7A;HSFA7B;HSFA6A	TraesCS5A02G237900	C5	AT4G36990	HSFB1	Y1H
TraesCS1A02G375600	C1	AT3G22830;AT3G51910;AT3G63350;AT5G43840	HSFA6B;HSFA7A;HSFA7B;HSFA6A	TraesCS5D02G244800	C5	AT4G36990	HSFB1	Y1H
TraesCS5A02G437900	C1	AT3G22830;AT3G51910;AT3G63350;AT5G43840	HSFA6B;HSFA7A;HSFA7B;HSFA6A	TraesCS5A02G237900	C5	AT4G36990	HSFB1	Y1H
TraesCS5A02G437900	C1	AT3G22830;AT3G51910;AT3G63350;AT5G43840	HSFA6B;HSFA7A;HSFA7B;HSFA6A	TraesCS5D02G244800	C5	AT4G36990	HSFB1	Y1H
TraesCS7A02G464100	C6	AT1G56010;AT3G12977	NAC021;AT3G12977	TraesCS5B02G236400	C5	AT4G36990	HSFB1	Y1H
TraesCS7A02G464100	C6	AT1G56010;AT3G12977	NAC021;AT3G12977	TraesCS5A02G237900	C5	AT4G36990	HSFB1	Y1H
TraesCS7A02G464100	C6	AT1G56010;AT3G12977	NAC021;AT3G12977	TraesCS5D02G244800	C5	AT4G36990	HSFB1	Y1H
TraesCS7D02G451700	C3	AT1G56010;AT3G12977	NAC021;AT3G12977	TraesCS5B02G236400	C5	AT4G36990	HSFB1	Y1H
TraesCS7D02G451700	C3	AT1G56010;AT3G12977	NAC021;AT3G12977	TraesCS5A02G237900	C5	AT4G36990	HSFB1	Y1H
TraesCS7D02G451700	C3	AT1G56010;AT3G12977	NAC021;AT3G12977	TraesCS5D02G244800	C5	AT4G36990	HSFB1	Y1H
TraesCS5A02G143200	C1	AT1G69490	NAC029	TraesCS5B02G236400	C5	AT4G36990	HSFB1	Y1H
TraesCS5A02G143200	C1	AT1G69490	NAC029	TraesCS5A02G237900	C5	AT4G36990	HSFB1	Y1H
TraesCS5B02G142100	C1	AT1G69490	NAC029	TraesCS5B02G236400	C5	AT4G36990	HSFB1	Y1H
TraesCS5B02G142100	C1	AT1G69490	NAC029	TraesCS5A02G237900	C5	AT4G36990	HSFB1	Y1H
TraesCS6A02G173800	C2	AT2G23290;AT3G50060;AT4G37260;AT5G67300	AtMYB70;MYB77;MYB73;MYB44	TraesCS7D02G182700	C3	AT1G36060	ERF055	Y1H
TraesCS6A02G173800	C2	AT2G23290;AT3G50060;AT4G37260;AT5G67300	AtMYB70;MYB77;MYB73;MYB44	TraesCS5D02G553300	C4	AT1G32330;AT3G02990;AT4G17750;AT5G16820	HSFA1D;HSFA1E;HSFA1A;HSFA1B	Y1H
TraesCS6A02G173800	C2	AT2G23290;AT3G50060;AT4G37260;AT5G67300	AtMYB70;MYB77;MYB73;MYB44	TraesCS1B02G168900	C4	AT3G24810;AT5G48820	KRP5;KRP3	Y1H
TraesCS5B02G141900	C6	AT1G76420	NAC031	TraesCS5B02G236400	C5	AT4G36990	HSFB1	Y1H
TraesCS5B02G141900	C6	AT1G76420	NAC031	TraesCS5A02G237900	C5	AT4G36990	HSFB1	Y1H
TraesCS5B02G141900	C6	AT1G76420	NAC031	TraesCS5D02G244800	C5	AT4G36990	HSFB1	Y1H
TraesCS7B02G443900	C2	AT2G23290;AT3G50060;AT4G37260;AT5G67300	AtMYB70;MYB77;MYB73;MYB44	TraesCS5D02G553300	C4	AT1G32330;AT3G02990;AT4G17750;AT5G16820	HSFA1D;HSFA1E;HSFA1A;HSFA1B	Y1H
TraesCS7B02G443900	C2	AT2G23290;AT3G50060;AT4G37260;AT5G67300	AtMYB70;MYB77;MYB73;MYB44	TraesCS1B02G168900	C4	AT3G24810;AT5G48820	KRP5;KRP3	Y1H
TraesCS4A02G176400	C6	AT1G07520;AT1G07530;AT2G29060;AT2G29065;AT2G37650;AT3G46600;AT5G59450	AT1G07520;SCL14;SCL33;SCL34;SCL9;SCL30;SCL11	TraesCS6D02G135500	C4	AT2G25180;AT4G31920	ARR12;ARR10	Y1H
TraesCS5D02G148900	C6	AT1G76420	NAC031	TraesCS5B02G236400	C5	AT4G36990	HSFB1	Y1H
TraesCS5D02G148900	C6	AT1G76420	NAC031	TraesCS5A02G237900	C5	AT4G36990	HSFB1	Y1H
TraesCS5D02G148900	C6	AT1G76420	NAC031	TraesCS5D02G244800	C5	AT4G36990	HSFB1	Y1H
TraesCS5A02G143100	C6	AT1G76420	NAC031	TraesCS5B02G236400	C5	AT4G36990	HSFB1	Y1H
TraesCS5A02G143100	C6	AT1G76420	NAC031	TraesCS5A02G237900	C5	AT4G36990	HSFB1	Y1H
TraesCS5A02G143100	C6	AT1G76420	NAC031	TraesCS5D02G244800	C5	AT4G36990	HSFB1	Y1H
TraesCS2B02G118500	C2	AT1G76420	NAC031	TraesCS5B02G236400	C5	AT4G36990	HSFB1	Y1H
TraesCS2B02G118500	C2	AT1G76420	NAC031	TraesCS5A02G237900	C5	AT4G36990	HSFB1	Y1H
TraesCS2B02G118500	C2	AT1G76420	NAC031	TraesCS5D02G244800	C5	AT4G36990	HSFB1	Y1H
TraesCS2D02G100900	C3	AT1G76420	NAC031	TraesCS5B02G236400	C5	AT4G36990	HSFB1	Y1H
TraesCS2D02G100900	C3	AT1G76420	NAC031	TraesCS5A02G237900	C5	AT4G36990	HSFB1	Y1H
TraesCS2D02G100900	C3	AT1G76420	NAC031	TraesCS5D02G244800	C5	AT4G36990	HSFB1	Y1H
TraesCS2A02G101400	C3	AT1G76420	NAC031	TraesCS5B02G236400	C5	AT4G36990	HSFB1	Y1H
TraesCS2A02G101400	C3	AT1G76420	NAC031	TraesCS5A02G237900	C5	AT4G36990	HSFB1	Y1H
TraesCS2A02G101400	C3	AT1G76420	NAC031	TraesCS5D02G244800	C5	AT4G36990	HSFB1	Y1H
TraesCS4A02G130600	C3	AT1G76420	NAC031	TraesCS5B02G236400	C5	AT4G36990	HSFB1	Y1H
TraesCS4A02G130600	C3	AT1G76420	NAC031	TraesCS5A02G237900	C5	AT4G36990	HSFB1	Y1H
TraesCS4A02G130600	C3	AT1G76420	NAC031	TraesCS5D02G244800	C5	AT4G36990	HSFB1	Y1H
TraesCS4B02G174000	C3	AT1G76420	NAC031	TraesCS5B02G236400	C5	AT4G36990	HSFB1	Y1H
TraesCS4B02G174000	C3	AT1G76420	NAC031	TraesCS5A02G237900	C5	AT4G36990	HSFB1	Y1H
TraesCS4B02G174000	C3	AT1G76420	NAC031	TraesCS5D02G244800	C5	AT4G36990	HSFB1	Y1H
TraesCS3D02G401200	C1	AT5G08790;AT5G63790	NAC081;ANAC102	TraesCS5B02G236400	C5	AT4G36990	HSFB1	Y1H
TraesCS3D02G401200	C1	AT5G08790;AT5G63790	NAC081;ANAC102	TraesCS5A02G237900	C5	AT4G36990	HSFB1	Y1H
TraesCS3D02G401200	C1	AT5G08790;AT5G63790	NAC081;ANAC102	TraesCS5D02G244800	C5	AT4G36990	HSFB1	Y1H
TraesCS3A02G406000	C1	AT5G08790;AT5G63790	NAC081;ANAC102	TraesCS5B02G236400	C5	AT4G36990	HSFB1	Y1H
TraesCS3A02G406000	C1	AT5G08790;AT5G63790	NAC081;ANAC102	TraesCS5A02G237900	C5	AT4G36990	HSFB1	Y1H
TraesCS4B02G141300	C4	AT1G07520;AT1G07530;AT2G29060;AT2G29065;AT2G37650;AT3G46600;AT5G59450	AT1G07520;SCL14;SCL33;SCL34;SCL9;SCL30;SCL11	TraesCS6D02G135500	C4	AT2G25180;AT4G31920	ARR12;ARR10	Y1H
TraesCS3A02G406000	C1	AT5G08790;AT5G63790	NAC081;ANAC102	TraesCS5D02G244800	C5	AT4G36990	HSFB1	Y1H
TraesCS3B02G439600	C1	AT5G08790;AT5G63790	NAC081;ANAC102	TraesCS5B02G236400	C5	AT4G36990	HSFB1	Y1H
TraesCS3B02G439600	C1	AT5G08790;AT5G63790	NAC081;ANAC102	TraesCS5A02G237900	C5	AT4G36990	HSFB1	Y1H
TraesCS3B02G439600	C1	AT5G08790;AT5G63790	NAC081;ANAC102	TraesCS5D02G244800	C5	AT4G36990	HSFB1	Y1H
TraesCS4B02G098200	C1	AT5G08790;AT5G63790	NAC081;ANAC102	TraesCS5B02G236400	C5	AT4G36990	HSFB1	Y1H
TraesCS4B02G098200	C1	AT5G08790;AT5G63790	NAC081;ANAC102	TraesCS5A02G237900	C5	AT4G36990	HSFB1	Y1H
TraesCS4B02G098200	C1	AT5G08790;AT5G63790	NAC081;ANAC102	TraesCS5D02G244800	C5	AT4G36990	HSFB1	Y1H
TraesCS4D02G094400	C5	AT5G08790;AT5G63790	NAC081;ANAC102	TraesCS5B02G236400	C5	AT4G36990	HSFB1	Y1H
TraesCS4D02G094400	C5	AT5G08790;AT5G63790	NAC081;ANAC102	TraesCS5A02G237900	C5	AT4G36990	HSFB1	Y1H
TraesCS4D02G094400	C5	AT5G08790;AT5G63790	NAC081;ANAC102	TraesCS5D02G244800	C5	AT4G36990	HSFB1	Y1H
TraesCS4A02G219700	C5	AT5G08790;AT5G63790	NAC081;ANAC102	TraesCS5B02G236400	C5	AT4G36990	HSFB1	Y1H
TraesCS4A02G219700	C5	AT5G08790;AT5G63790	NAC081;ANAC102	TraesCS5A02G237900	C5	AT4G36990	HSFB1	Y1H
TraesCS4A02G219700	C5	AT5G08790;AT5G63790	NAC081;ANAC102	TraesCS5D02G244800	C5	AT4G36990	HSFB1	Y1H
TraesCS5A02G316800	C3	AT2G46680;AT3G61890	ATHB-7;ATHB-12	TraesCS6D02G135500	C4	AT2G25180;AT4G31920	ARR12;ARR10	Y1H
TraesCS1D02G263800	C5	AT5G08790;AT5G63790	NAC081;ANAC102	TraesCS5B02G236400	C5	AT4G36990	HSFB1	Y1H
TraesCS1D02G263800	C5	AT5G08790;AT5G63790	NAC081;ANAC102	TraesCS5A02G237900	C5	AT4G36990	HSFB1	Y1H
TraesCS1D02G263800	C5	AT5G08790;AT5G63790	NAC081;ANAC102	TraesCS5D02G244800	C5	AT4G36990	HSFB1	Y1H
TraesCS1B02G274300	C5	AT5G08790;AT5G63790	NAC081;ANAC102	TraesCS5B02G236400	C5	AT4G36990	HSFB1	Y1H
TraesCS1B02G274300	C5	AT5G08790;AT5G63790	NAC081;ANAC102	TraesCS5A02G237900	C5	AT4G36990	HSFB1	Y1H
TraesCS1B02G274300	C5	AT5G08790;AT5G63790	NAC081;ANAC102	TraesCS5D02G244800	C5	AT4G36990	HSFB1	Y1H
TraesCS1A02G263700	C5	AT5G08790;AT5G63790	NAC081;ANAC102	TraesCS5B02G236400	C5	AT4G36990	HSFB1	Y1H
TraesCS6A02G330500	C4	AT1G21910;AT1G44830;AT1G77640	ERF012;ERF014;ERF013	TraesCS6B02G174400	C4	AT2G25180;AT4G31920	ARR12;ARR10	Y1H
TraesCS6A02G330500	C4	AT1G21910;AT1G44830;AT1G77640	ERF012;ERF014;ERF013	TraesCS6D02G135500	C4	AT2G25180;AT4G31920	ARR12;ARR10	Y1H
TraesCS6A02G330500	C4	AT1G21910;AT1G44830;AT1G77640	ERF012;ERF014;ERF013	TraesCS1B02G168900	C4	AT3G24810;AT5G48820	KRP5;KRP3	Y1H
TraesCS6A02G330500	C4	AT1G21910;AT1G44830;AT1G77640	ERF012;ERF014;ERF013	TraesCS5D02G243900	C4	AT1G46264	HSFB4	Y1H
TraesCS1D02G230900	C3	AT3G16770	RAP2-3	TraesCS5D02G206200	C4	AT1G70210	CYCD1-1	Y1H
TraesCS1A02G263700	C5	AT5G08790;AT5G63790	NAC081;ANAC102	TraesCS5A02G237900	C5	AT4G36990	HSFB1	Y1H
TraesCS1A02G263700	C5	AT5G08790;AT5G63790	NAC081;ANAC102	TraesCS5D02G244800	C5	AT4G36990	HSFB1	Y1H
TraesCS7A02G264100	C4	AT1G43160;AT5G61890	RAP2-6;ERF114	TraesCS5A02G237900	C5	AT4G36990	HSFB1	Y1H
TraesCS5B02G399900	C1	AT1G69310	WRKY57	TraesCS5B02G236400	C5	AT4G36990	HSFB1	Y1H
TraesCS5B02G399900	C1	AT1G69310	WRKY57	TraesCS5A02G237900	C5	AT4G36990	HSFB1	Y1H
TraesCS5D02G404400	C2	AT1G69310	WRKY57	TraesCS5B02G236400	C5	AT4G36990	HSFB1	Y1H
TraesCS5D02G404400	C2	AT1G69310	WRKY57	TraesCS5A02G237900	C5	AT4G36990	HSFB1	Y1H
TraesCS5D02G404400	C2	AT1G69310	WRKY57	TraesCS5D02G244800	C5	AT4G36990	HSFB1	Y1H
TraesCS5A02G395100	C2	AT1G69310	WRKY57	TraesCS5B02G236400	C5	AT4G36990	HSFB1	Y1H
TraesCS5A02G395100	C2	AT1G69310	WRKY57	TraesCS5A02G237900	C5	AT4G36990	HSFB1	Y1H
TraesCS5A02G395100	C2	AT1G69310	WRKY57	TraesCS5D02G244800	C5	AT4G36990	HSFB1	Y1H
TraesCS3A02G371800	C1	AT2G36270	ABI5	TraesCS2D02G399000	C1	AT4G11660;AT5G62020	HSFB2B;HSFB2A	Y1H
TraesCS3D02G364900	C5	AT2G36270	ABI5	TraesCS2D02G399000	C1	AT4G11660;AT5G62020	HSFB2B;HSFB2A	Y1H
TraesCS3B02G404600	C5	AT2G36270	ABI5	TraesCS2D02G399000	C1	AT4G11660;AT5G62020	HSFB2B;HSFB2A	Y1H
TraesCS3B02G404300	C2	AT2G36270	ABI5	TraesCS2D02G399000	C1	AT4G11660;AT5G62020	HSFB2B;HSFB2A	Y1H
TraesCS5A02G441900	C3	AT1G03040;AT4G02590	AT1G03040;UNE12	TraesCS2D02G399000	C1	AT4G11660;AT5G62020	HSFB2B;HSFB2A	Y1H
TraesCS5B02G445900	C3	AT1G03040;AT4G02590	AT1G03040;UNE12	TraesCS2D02G399000	C1	AT4G11660;AT5G62020	HSFB2B;HSFB2A	Y1H
TraesCS5D02G449200	C3	AT1G03040;AT4G02590	AT1G03040;UNE12	TraesCS2D02G399000	C1	AT4G11660;AT5G62020	HSFB2B;HSFB2A	Y1H
TraesCS3B02G453300	C1	AT2G47190;AT3G06490;AT5G49620	ATMYB2;MYB108;AtMYB78	TraesCS2A02G401600	C1	AT4G11660;AT5G62020	HSFB2B;HSFB2A	Y1H
TraesCS1A02G076200	C1	AT2G47190;AT3G06490;AT5G49620	ATMYB2;MYB108;AtMYB78	TraesCS2A02G401600	C1	AT4G11660;AT5G62020	HSFB2B;HSFB2A	Y1H
TraesCS3D02G413700	C1	AT2G47190;AT3G06490;AT5G49620	ATMYB2;MYB108;AtMYB78	TraesCS2A02G401600	C1	AT4G11660;AT5G62020	HSFB2B;HSFB2A	Y1H
TraesCS3A02G418100	C1	AT2G47190;AT3G06490;AT5G49620	ATMYB2;MYB108;AtMYB78	TraesCS2A02G401600	C1	AT4G11660;AT5G62020	HSFB2B;HSFB2A	Y1H
TraesCS2D02G096000	C4	AT2G47190;AT3G06490;AT5G49620	ATMYB2;MYB108;AtMYB78	TraesCS2A02G401600	C1	AT4G11660;AT5G62020	HSFB2B;HSFB2A	Y1H
TraesCS2A02G097200	C4	AT2G47190;AT3G06490;AT5G49620	ATMYB2;MYB108;AtMYB78	TraesCS2A02G401600	C1	AT4G11660;AT5G62020	HSFB2B;HSFB2A	Y1H
TraesCS7A02G526500	C1	AT2G23290;AT3G50060;AT4G37260;AT5G67300	AtMYB70;MYB77;MYB73;MYB44	TraesCS2A02G401600	C1	AT4G11660;AT5G62020	HSFB2B;HSFB2A	Y1H
TraesCS6B02G201700	C2	AT2G23290;AT3G50060;AT4G37260;AT5G67300	AtMYB70;MYB77;MYB73;MYB44	TraesCS2A02G401600	C1	AT4G11660;AT5G62020	HSFB2B;HSFB2A	Y1H
TraesCS7A02G526600	C2	AT2G23290;AT3G50060;AT4G37260;AT5G67300	AtMYB70;MYB77;MYB73;MYB44	TraesCS5D02G553300	C4	AT1G32330;AT3G02990;AT4G17750;AT5G16820	HSFA1D;HSFA1E;HSFA1A;HSFA1B	Y1H
TraesCS7A02G526600	C2	AT2G23290;AT3G50060;AT4G37260;AT5G67300	AtMYB70;MYB77;MYB73;MYB44	TraesCS1B02G168900	C4	AT3G24810;AT5G48820	KRP5;KRP3	Y1H
TraesCS6D02G162900	C2	AT2G23290;AT3G50060;AT4G37260;AT5G67300	AtMYB70;MYB77;MYB73;MYB44	TraesCS2A02G401600	C1	AT4G11660;AT5G62020	HSFB2B;HSFB2A	Y1H
TraesCS6A02G173800	C2	AT2G23290;AT3G50060;AT4G37260;AT5G67300	AtMYB70;MYB77;MYB73;MYB44	TraesCS2A02G401600	C1	AT4G11660;AT5G62020	HSFB2B;HSFB2A	Y1H
TraesCS7A02G526600	C2	AT2G23290;AT3G50060;AT4G37260;AT5G67300	AtMYB70;MYB77;MYB73;MYB44	TraesCS2A02G401600	C1	AT4G11660;AT5G62020	HSFB2B;HSFB2A	Y1H
TraesCS5B02G226100	C1	AT1G74650;AT3G28910;AT3G47600;AT5G62470	ATY13;MYB30;MYB94;MYB96	TraesCS2A02G401600	C1	AT4G11660;AT5G62020	HSFB2B;HSFB2A	Y1H
TraesCS2D02G163700	C1	AT1G74650;AT3G28910;AT3G47600;AT5G62470	ATY13;MYB30;MYB94;MYB96	TraesCS2A02G401600	C1	AT4G11660;AT5G62020	HSFB2B;HSFB2A	Y1H
TraesCS2B02G183100	C1	AT1G74650;AT3G28910;AT3G47600;AT5G62470	ATY13;MYB30;MYB94;MYB96	TraesCS2A02G401600	C1	AT4G11660;AT5G62020	HSFB2B;HSFB2A	Y1H
TraesCS2A02G157600	C1	AT1G74650;AT3G28910;AT3G47600;AT5G62470	ATY13;MYB30;MYB94;MYB96	TraesCS2A02G401600	C1	AT4G11660;AT5G62020	HSFB2B;HSFB2A	Y1H
TraesCS5A02G310100	C1	AT1G12610;AT1G63030;AT4G25470;AT4G25480;AT4G25490;AT5G51990	DREB1F;DREB1E;DREB1C;DREB1A;DREB1B;DREB1D	TraesCS2D02G399000	C1	AT4G11660;AT5G62020	HSFB2B;HSFB2A	Y1H
TraesCS5A02G310100	C1	AT1G12610;AT1G63030;AT4G25470;AT4G25480;AT4G25490;AT5G51990	DREB1F;DREB1E;DREB1C;DREB1A;DREB1B;DREB1D	TraesCS2A02G401600	C1	AT4G11660;AT5G62020	HSFB2B;HSFB2A	Y1H
TraesCS5A02G310000	C1	AT1G12610;AT1G63030;AT4G25470;AT4G25480;AT4G25490;AT5G51990	DREB1F;DREB1E;DREB1C;DREB1A;DREB1B;DREB1D	TraesCS2D02G399000	C1	AT4G11660;AT5G62020	HSFB2B;HSFB2A	Y1H
TraesCS5A02G310000	C1	AT1G12610;AT1G63030;AT4G25470;AT4G25480;AT4G25490;AT5G51990	DREB1F;DREB1E;DREB1C;DREB1A;DREB1B;DREB1D	TraesCS2A02G401600	C1	AT4G11660;AT5G62020	HSFB2B;HSFB2A	Y1H
TraesCS5D02G317200	C1	AT1G12610;AT1G63030;AT4G25470;AT4G25480;AT4G25490;AT5G51990	DREB1F;DREB1E;DREB1C;DREB1A;DREB1B;DREB1D	TraesCS2D02G399000	C1	AT4G11660;AT5G62020	HSFB2B;HSFB2A	Y1H
TraesCS5D02G317200	C1	AT1G12610;AT1G63030;AT4G25470;AT4G25480;AT4G25490;AT5G51990	DREB1F;DREB1E;DREB1C;DREB1A;DREB1B;DREB1D	TraesCS2A02G401600	C1	AT4G11660;AT5G62020	HSFB2B;HSFB2A	Y1H
TraesCS6A02G381200	C1	AT1G12610;AT1G63030;AT4G25470;AT4G25480;AT4G25490;AT5G51990	DREB1F;DREB1E;DREB1C;DREB1A;DREB1B;DREB1D	TraesCS2D02G399000	C1	AT4G11660;AT5G62020	HSFB2B;HSFB2A	Y1H
TraesCS6A02G381200	C1	AT1G12610;AT1G63030;AT4G25470;AT4G25480;AT4G25490;AT5G51990	DREB1F;DREB1E;DREB1C;DREB1A;DREB1B;DREB1D	TraesCS2A02G401600	C1	AT4G11660;AT5G62020	HSFB2B;HSFB2A	Y1H
TraesCS5D02G318500	C1	AT1G12610;AT1G63030;AT4G25470;AT4G25480;AT4G25490;AT5G51990	DREB1F;DREB1E;DREB1C;DREB1A;DREB1B;DREB1D	TraesCS2D02G399000	C1	AT4G11660;AT5G62020	HSFB2B;HSFB2A	Y1H
TraesCS5D02G318500	C1	AT1G12610;AT1G63030;AT4G25470;AT4G25480;AT4G25490;AT5G51990	DREB1F;DREB1E;DREB1C;DREB1A;DREB1B;DREB1D	TraesCS2A02G401600	C1	AT4G11660;AT5G62020	HSFB2B;HSFB2A	Y1H
TraesCS6D02G173500	C1	AT1G12610;AT1G63030;AT4G25470;AT4G25480;AT4G25490;AT5G51990	DREB1F;DREB1E;DREB1C;DREB1A;DREB1B;DREB1D	TraesCS2D02G399000	C1	AT4G11660;AT5G62020	HSFB2B;HSFB2A	Y1H
TraesCS6D02G173500	C1	AT1G12610;AT1G63030;AT4G25470;AT4G25480;AT4G25490;AT5G51990	DREB1F;DREB1E;DREB1C;DREB1A;DREB1B;DREB1D	TraesCS2A02G401600	C1	AT4G11660;AT5G62020	HSFB2B;HSFB2A	Y1H
TraesCS6D02G366100	C1	AT1G12610;AT1G63030;AT4G25470;AT4G25480;AT4G25490;AT5G51990	DREB1F;DREB1E;DREB1C;DREB1A;DREB1B;DREB1D	TraesCS2D02G399000	C1	AT4G11660;AT5G62020	HSFB2B;HSFB2A	Y1H
TraesCS6D02G366100	C1	AT1G12610;AT1G63030;AT4G25470;AT4G25480;AT4G25490;AT5G51990	DREB1F;DREB1E;DREB1C;DREB1A;DREB1B;DREB1D	TraesCS2A02G401600	C1	AT4G11660;AT5G62020	HSFB2B;HSFB2A	Y1H
TraesCS6A02G381000	C1	AT1G12610;AT1G63030;AT4G25470;AT4G25480;AT4G25490;AT5G51990	DREB1F;DREB1E;DREB1C;DREB1A;DREB1B;DREB1D	TraesCS2D02G399000	C1	AT4G11660;AT5G62020	HSFB2B;HSFB2A	Y1H
TraesCS6A02G381000	C1	AT1G12610;AT1G63030;AT4G25470;AT4G25480;AT4G25490;AT5G51990	DREB1F;DREB1E;DREB1C;DREB1A;DREB1B;DREB1D	TraesCS2A02G401600	C1	AT4G11660;AT5G62020	HSFB2B;HSFB2A	Y1H
TraesCS6D02G238200	C1	AT1G12610;AT1G63030;AT4G25470;AT4G25480;AT4G25490;AT5G51990	DREB1F;DREB1E;DREB1C;DREB1A;DREB1B;DREB1D	TraesCS2D02G399000	C1	AT4G11660;AT5G62020	HSFB2B;HSFB2A	Y1H
TraesCS6D02G238200	C1	AT1G12610;AT1G63030;AT4G25470;AT4G25480;AT4G25490;AT5G51990	DREB1F;DREB1E;DREB1C;DREB1A;DREB1B;DREB1D	TraesCS2A02G401600	C1	AT4G11660;AT5G62020	HSFB2B;HSFB2A	Y1H
TraesCS6A02G256900	C1	AT1G12610;AT1G63030;AT4G25470;AT4G25480;AT4G25490;AT5G51990	DREB1F;DREB1E;DREB1C;DREB1A;DREB1B;DREB1D	TraesCS2D02G399000	C1	AT4G11660;AT5G62020	HSFB2B;HSFB2A	Y1H
TraesCS6A02G256900	C1	AT1G12610;AT1G63030;AT4G25470;AT4G25480;AT4G25490;AT5G51990	DREB1F;DREB1E;DREB1C;DREB1A;DREB1B;DREB1D	TraesCS2A02G401600	C1	AT4G11660;AT5G62020	HSFB2B;HSFB2A	Y1H
TraesCS6B02G420100	C1	AT1G12610;AT1G63030;AT4G25470;AT4G25480;AT4G25490;AT5G51990	DREB1F;DREB1E;DREB1C;DREB1A;DREB1B;DREB1D	TraesCS2D02G399000	C1	AT4G11660;AT5G62020	HSFB2B;HSFB2A	Y1H
TraesCS6B02G420100	C1	AT1G12610;AT1G63030;AT4G25470;AT4G25480;AT4G25490;AT5G51990	DREB1F;DREB1E;DREB1C;DREB1A;DREB1B;DREB1D	TraesCS2A02G401600	C1	AT4G11660;AT5G62020	HSFB2B;HSFB2A	Y1H
TraesCS6B02G218000	C1	AT1G12610;AT1G63030;AT4G25470;AT4G25480;AT4G25490;AT5G51990	DREB1F;DREB1E;DREB1C;DREB1A;DREB1B;DREB1D	TraesCS2D02G399000	C1	AT4G11660;AT5G62020	HSFB2B;HSFB2A	Y1H
TraesCS6B02G268100	C1	AT1G12610;AT1G63030;AT4G25470;AT4G25480;AT4G25490;AT5G51990	DREB1F;DREB1E;DREB1C;DREB1A;DREB1B;DREB1D	TraesCS2D02G399000	C1	AT4G11660;AT5G62020	HSFB2B;HSFB2A	Y1H
TraesCS6D02G365800	C1	AT1G12610;AT1G63030;AT4G25470;AT4G25480;AT4G25490;AT5G51990	DREB1F;DREB1E;DREB1C;DREB1A;DREB1B;DREB1D	TraesCS2D02G399000	C1	AT4G11660;AT5G62020	HSFB2B;HSFB2A	Y1H
TraesCS6B02G218000	C1	AT1G12610;AT1G63030;AT4G25470;AT4G25480;AT4G25490;AT5G51990	DREB1F;DREB1E;DREB1C;DREB1A;DREB1B;DREB1D	TraesCS2A02G401600	C1	AT4G11660;AT5G62020	HSFB2B;HSFB2A	Y1H
TraesCS6B02G268100	C1	AT1G12610;AT1G63030;AT4G25470;AT4G25480;AT4G25490;AT5G51990	DREB1F;DREB1E;DREB1C;DREB1A;DREB1B;DREB1D	TraesCS2A02G401600	C1	AT4G11660;AT5G62020	HSFB2B;HSFB2A	Y1H
TraesCS6D02G365800	C1	AT1G12610;AT1G63030;AT4G25470;AT4G25480;AT4G25490;AT5G51990	DREB1F;DREB1E;DREB1C;DREB1A;DREB1B;DREB1D	TraesCS2A02G401600	C1	AT4G11660;AT5G62020	HSFB2B;HSFB2A	Y1H
TraesCS5B02G310800	C1	AT1G12610;AT1G63030;AT4G25470;AT4G25480;AT4G25490;AT5G51990	DREB1F;DREB1E;DREB1C;DREB1A;DREB1B;DREB1D	TraesCS2D02G399000	C1	AT4G11660;AT5G62020	HSFB2B;HSFB2A	Y1H
TraesCS5B02G310800	C1	AT1G12610;AT1G63030;AT4G25470;AT4G25480;AT4G25490;AT5G51990	DREB1F;DREB1E;DREB1C;DREB1A;DREB1B;DREB1D	TraesCS2A02G401600	C1	AT4G11660;AT5G62020	HSFB2B;HSFB2A	Y1H
TraesCS5D02G317100	C1	AT1G12610;AT1G63030;AT4G25470;AT4G25480;AT4G25490;AT5G51990	DREB1F;DREB1E;DREB1C;DREB1A;DREB1B;DREB1D	TraesCS2D02G399000	C1	AT4G11660;AT5G62020	HSFB2B;HSFB2A	Y1H
TraesCS5D02G317100	C1	AT1G12610;AT1G63030;AT4G25470;AT4G25480;AT4G25490;AT5G51990	DREB1F;DREB1E;DREB1C;DREB1A;DREB1B;DREB1D	TraesCS2A02G401600	C1	AT4G11660;AT5G62020	HSFB2B;HSFB2A	Y1H
TraesCS4A02G433200	C1	AT1G12610;AT1G63030;AT4G25470;AT4G25480;AT4G25490;AT5G51990	DREB1F;DREB1E;DREB1C;DREB1A;DREB1B;DREB1D	TraesCS2D02G399000	C1	AT4G11660;AT5G62020	HSFB2B;HSFB2A	Y1H
TraesCS4A02G433200	C1	AT1G12610;AT1G63030;AT4G25470;AT4G25480;AT4G25490;AT5G51990	DREB1F;DREB1E;DREB1C;DREB1A;DREB1B;DREB1D	TraesCS2A02G401600	C1	AT4G11660;AT5G62020	HSFB2B;HSFB2A	Y1H
TraesCS7D02G052400	C1	AT1G12610;AT1G63030;AT4G25470;AT4G25480;AT4G25490;AT5G51990	DREB1F;DREB1E;DREB1C;DREB1A;DREB1B;DREB1D	TraesCS2D02G399000	C1	AT4G11660;AT5G62020	HSFB2B;HSFB2A	Y1H
TraesCS7D02G052400	C1	AT1G12610;AT1G63030;AT4G25470;AT4G25480;AT4G25490;AT5G51990	DREB1F;DREB1E;DREB1C;DREB1A;DREB1B;DREB1D	TraesCS2A02G401600	C1	AT4G11660;AT5G62020	HSFB2B;HSFB2A	Y1H
TraesCS7A02G057700	C1	AT1G12610;AT1G63030;AT4G25470;AT4G25480;AT4G25490;AT5G51990	DREB1F;DREB1E;DREB1C;DREB1A;DREB1B;DREB1D	TraesCS2D02G399000	C1	AT4G11660;AT5G62020	HSFB2B;HSFB2A	Y1H
TraesCS7A02G057700	C1	AT1G12610;AT1G63030;AT4G25470;AT4G25480;AT4G25490;AT5G51990	DREB1F;DREB1E;DREB1C;DREB1A;DREB1B;DREB1D	TraesCS2A02G401600	C1	AT4G11660;AT5G62020	HSFB2B;HSFB2A	Y1H
TraesCS5A02G310500	C5	AT1G12610;AT1G63030;AT4G25470;AT4G25480;AT4G25490;AT5G51990	DREB1F;DREB1E;DREB1C;DREB1A;DREB1B;DREB1D	TraesCS2D02G399000	C1	AT4G11660;AT5G62020	HSFB2B;HSFB2A	Y1H
TraesCS5A02G310500	C5	AT1G12610;AT1G63030;AT4G25470;AT4G25480;AT4G25490;AT5G51990	DREB1F;DREB1E;DREB1C;DREB1A;DREB1B;DREB1D	TraesCS2A02G401600	C1	AT4G11660;AT5G62020	HSFB2B;HSFB2A	Y1H
TraesCS7D02G052500	C1	AT1G12610;AT1G63030;AT4G25470;AT4G25480;AT4G25490;AT5G51990	DREB1F;DREB1E;DREB1C;DREB1A;DREB1B;DREB1D	TraesCS2D02G399000	C1	AT4G11660;AT5G62020	HSFB2B;HSFB2A	Y1H
TraesCS7D02G052500	C1	AT1G12610;AT1G63030;AT4G25470;AT4G25480;AT4G25490;AT5G51990	DREB1F;DREB1E;DREB1C;DREB1A;DREB1B;DREB1D	TraesCS2A02G401600	C1	AT4G11660;AT5G62020	HSFB2B;HSFB2A	Y1H
TraesCS7D02G052600	C1	AT1G12610;AT1G63030;AT4G25470;AT4G25480;AT4G25490;AT5G51990	DREB1F;DREB1E;DREB1C;DREB1A;DREB1B;DREB1D	TraesCS2D02G399000	C1	AT4G11660;AT5G62020	HSFB2B;HSFB2A	Y1H
TraesCS7D02G052600	C1	AT1G12610;AT1G63030;AT4G25470;AT4G25480;AT4G25490;AT5G51990	DREB1F;DREB1E;DREB1C;DREB1A;DREB1B;DREB1D	TraesCS2A02G401600	C1	AT4G11660;AT5G62020	HSFB2B;HSFB2A	Y1H
TraesCS7A02G057800	C5	AT1G12610;AT1G63030;AT4G25470;AT4G25480;AT4G25490;AT5G51990	DREB1F;DREB1E;DREB1C;DREB1A;DREB1B;DREB1D	TraesCS2D02G399000	C1	AT4G11660;AT5G62020	HSFB2B;HSFB2A	Y1H
TraesCS7A02G057800	C5	AT1G12610;AT1G63030;AT4G25470;AT4G25480;AT4G25490;AT5G51990	DREB1F;DREB1E;DREB1C;DREB1A;DREB1B;DREB1D	TraesCS2A02G401600	C1	AT4G11660;AT5G62020	HSFB2B;HSFB2A	Y1H
TraesCS5D02G317400	C4	AT1G12610;AT1G63030;AT4G25470;AT4G25480;AT4G25490;AT5G51990	DREB1F;DREB1E;DREB1C;DREB1A;DREB1B;DREB1D	TraesCS2D02G399000	C1	AT4G11660;AT5G62020	HSFB2B;HSFB2A	Y1H
TraesCS5D02G317400	C4	AT1G12610;AT1G63030;AT4G25470;AT4G25480;AT4G25490;AT5G51990	DREB1F;DREB1E;DREB1C;DREB1A;DREB1B;DREB1D	TraesCS2A02G401600	C1	AT4G11660;AT5G62020	HSFB2B;HSFB2A	Y1H
TraesCS1B02G235100	C1	AT3G11020;AT5G05410	DREB2B;DREB2A	TraesCS2D02G399000	C1	AT4G11660;AT5G62020	HSFB2B;HSFB2A	Y1H
TraesCS1B02G235100	C1	AT3G11020;AT5G05410	DREB2B;DREB2A	TraesCS2A02G401600	C1	AT4G11660;AT5G62020	HSFB2B;HSFB2A	Y1H
TraesCS1D02G223600	C1	AT3G11020;AT5G05410	DREB2B;DREB2A	TraesCS2D02G399000	C1	AT4G11660;AT5G62020	HSFB2B;HSFB2A	Y1H
TraesCS1D02G223600	C1	AT3G11020;AT5G05410	DREB2B;DREB2A	TraesCS2A02G401600	C1	AT4G11660;AT5G62020	HSFB2B;HSFB2A	Y1H
TraesCS1A02G221900	C1	AT3G11020;AT5G05410	DREB2B;DREB2A	TraesCS2D02G399000	C1	AT4G11660;AT5G62020	HSFB2B;HSFB2A	Y1H
TraesCS1A02G221900	C1	AT3G11020;AT5G05410	DREB2B;DREB2A	TraesCS2A02G401600	C1	AT4G11660;AT5G62020	HSFB2B;HSFB2A	Y1H
TraesCS3A02G099200	C4	AT3G11020;AT5G05410	DREB2B;DREB2A	TraesCS2D02G399000	C1	AT4G11660;AT5G62020	HSFB2B;HSFB2A	Y1H
TraesCS3A02G099200	C4	AT3G11020;AT5G05410	DREB2B;DREB2A	TraesCS2A02G401600	C1	AT4G11660;AT5G62020	HSFB2B;HSFB2A	Y1H
TraesCS7D02G170600	C1	AT1G21910;AT1G44830;AT1G77640	ERF012;ERF014;ERF013	TraesCS2D02G399000	C1	AT4G11660;AT5G62020	HSFB2B;HSFB2A	Y1H
TraesCS7D02G170600	C1	AT1G21910;AT1G44830;AT1G77640	ERF012;ERF014;ERF013	TraesCS2A02G401600	C1	AT4G11660;AT5G62020	HSFB2B;HSFB2A	Y1H
TraesCS7B02G074500	C1	AT1G21910;AT1G44830;AT1G77640	ERF012;ERF014;ERF013	TraesCS2D02G399000	C1	AT4G11660;AT5G62020	HSFB2B;HSFB2A	Y1H
TraesCS7B02G074500	C1	AT1G21910;AT1G44830;AT1G77640	ERF012;ERF014;ERF013	TraesCS2A02G401600	C1	AT4G11660;AT5G62020	HSFB2B;HSFB2A	Y1H
TraesCS7A02G169300	C1	AT1G21910;AT1G44830;AT1G77640	ERF012;ERF014;ERF013	TraesCS2D02G399000	C1	AT4G11660;AT5G62020	HSFB2B;HSFB2A	Y1H
TraesCS7A02G169300	C1	AT1G21910;AT1G44830;AT1G77640	ERF012;ERF014;ERF013	TraesCS2A02G401600	C1	AT4G11660;AT5G62020	HSFB2B;HSFB2A	Y1H
TraesCS6D02G309600	C4	AT1G21910;AT1G44830;AT1G77640	ERF012;ERF014;ERF013	TraesCS2D02G399000	C1	AT4G11660;AT5G62020	HSFB2B;HSFB2A	Y1H
TraesCS6D02G309600	C4	AT1G21910;AT1G44830;AT1G77640	ERF012;ERF014;ERF013	TraesCS2A02G401600	C1	AT4G11660;AT5G62020	HSFB2B;HSFB2A	Y1H
TraesCS5D02G185300	C5	AT1G25470;AT1G68550;AT3G25890	ERF116;ERF118;ERF119	TraesCS2A02G401600	C1	AT4G11660;AT5G62020	HSFB2B;HSFB2A	Y1H
TraesCS5B02G178600	C5	AT1G25470;AT1G68550;AT3G25890	ERF116;ERF118;ERF119	TraesCS2A02G401600	C1	AT4G11660;AT5G62020	HSFB2B;HSFB2A	Y1H
TraesCS5A02G180800	C5	AT1G25470;AT1G68550;AT3G25890	ERF116;ERF118;ERF119	TraesCS2A02G401600	C1	AT4G11660;AT5G62020	HSFB2B;HSFB2A	Y1H
TraesCS3B02G357600	C1	AT1G28360	ERF12	TraesCS2D02G399000	C1	AT4G11660;AT5G62020	HSFB2B;HSFB2A	Y1H
TraesCS3B02G357600	C1	AT1G28360	ERF12	TraesCS2A02G401600	C1	AT4G11660;AT5G62020	HSFB2B;HSFB2A	Y1H
TraesCS3A02G328100	C1	AT1G28360	ERF12	TraesCS2D02G399000	C1	AT4G11660;AT5G62020	HSFB2B;HSFB2A	Y1H
TraesCS3A02G328100	C1	AT1G28360	ERF12	TraesCS2A02G401600	C1	AT4G11660;AT5G62020	HSFB2B;HSFB2A	Y1H
TraesCS6A02G243300	C1	AT4G17500;AT5G47220	ERF1A;ERF2	TraesCS2D02G399000	C1	AT4G11660;AT5G62020	HSFB2B;HSFB2A	Y1H
TraesCS6A02G243300	C1	AT4G17500;AT5G47220	ERF1A;ERF2	TraesCS2A02G401600	C1	AT4G11660;AT5G62020	HSFB2B;HSFB2A	Y1H
TraesCS2D02G414600	C1	AT4G17500;AT5G47220	ERF1A;ERF2	TraesCS2D02G399000	C1	AT4G11660;AT5G62020	HSFB2B;HSFB2A	Y1H
TraesCS2D02G414600	C1	AT4G17500;AT5G47220	ERF1A;ERF2	TraesCS2A02G401600	C1	AT4G11660;AT5G62020	HSFB2B;HSFB2A	Y1H
TraesCS2A02G417300	C1	AT4G17500;AT5G47220	ERF1A;ERF2	TraesCS2D02G399000	C1	AT4G11660;AT5G62020	HSFB2B;HSFB2A	Y1H
TraesCS2A02G417300	C1	AT4G17500;AT5G47220	ERF1A;ERF2	TraesCS2A02G401600	C1	AT4G11660;AT5G62020	HSFB2B;HSFB2A	Y1H
TraesCS2B02G436300	C1	AT4G17500;AT5G47220	ERF1A;ERF2	TraesCS2D02G399000	C1	AT4G11660;AT5G62020	HSFB2B;HSFB2A	Y1H
TraesCS2B02G436300	C1	AT4G17500;AT5G47220	ERF1A;ERF2	TraesCS2A02G401600	C1	AT4G11660;AT5G62020	HSFB2B;HSFB2A	Y1H
TraesCS6D02G225500	C1	AT4G17500;AT5G47220	ERF1A;ERF2	TraesCS2D02G399000	C1	AT4G11660;AT5G62020	HSFB2B;HSFB2A	Y1H
TraesCS6D02G225500	C1	AT4G17500;AT5G47220	ERF1A;ERF2	TraesCS2A02G401600	C1	AT4G11660;AT5G62020	HSFB2B;HSFB2A	Y1H
TraesCS6B02G281000	C5	AT4G17500;AT5G47220	ERF1A;ERF2	TraesCS2D02G399000	C1	AT4G11660;AT5G62020	HSFB2B;HSFB2A	Y1H
TraesCS6B02G281000	C5	AT4G17500;AT5G47220	ERF1A;ERF2	TraesCS2A02G401600	C1	AT4G11660;AT5G62020	HSFB2B;HSFB2A	Y1H
TraesCS3B02G357500	C1	AT1G53170;AT3G15210;AT5G44210	ERF8;ERF4;ERF9	TraesCS2D02G399000	C1	AT4G11660;AT5G62020	HSFB2B;HSFB2A	Y1H
TraesCS3B02G357500	C1	AT1G53170;AT3G15210;AT5G44210	ERF8;ERF4;ERF9	TraesCS2A02G401600	C1	AT4G11660;AT5G62020	HSFB2B;HSFB2A	Y1H
TraesCS1B02G326600	C1	AT1G53170;AT3G15210;AT5G44210	ERF8;ERF4;ERF9	TraesCS2D02G399000	C1	AT4G11660;AT5G62020	HSFB2B;HSFB2A	Y1H
TraesCS1B02G326600	C1	AT1G53170;AT3G15210;AT5G44210	ERF8;ERF4;ERF9	TraesCS2A02G401600	C1	AT4G11660;AT5G62020	HSFB2B;HSFB2A	Y1H
TraesCS3A02G328000	C1	AT1G53170;AT3G15210;AT5G44210	ERF8;ERF4;ERF9	TraesCS2D02G399000	C1	AT4G11660;AT5G62020	HSFB2B;HSFB2A	Y1H
TraesCS3A02G328000	C1	AT1G53170;AT3G15210;AT5G44210	ERF8;ERF4;ERF9	TraesCS2A02G401600	C1	AT4G11660;AT5G62020	HSFB2B;HSFB2A	Y1H
TraesCS1D02G314800	C1	AT1G53170;AT3G15210;AT5G44210	ERF8;ERF4;ERF9	TraesCS2D02G399000	C1	AT4G11660;AT5G62020	HSFB2B;HSFB2A	Y1H
TraesCS1D02G314800	C1	AT1G53170;AT3G15210;AT5G44210	ERF8;ERF4;ERF9	TraesCS2A02G401600	C1	AT4G11660;AT5G62020	HSFB2B;HSFB2A	Y1H
TraesCS1A02G314300	C1	AT1G53170;AT3G15210;AT5G44210	ERF8;ERF4;ERF9	TraesCS2D02G399000	C1	AT4G11660;AT5G62020	HSFB2B;HSFB2A	Y1H
TraesCS1A02G314300	C1	AT1G53170;AT3G15210;AT5G44210	ERF8;ERF4;ERF9	TraesCS2A02G401600	C1	AT4G11660;AT5G62020	HSFB2B;HSFB2A	Y1H
TraesCS3D02G321500	C1	AT1G53170;AT3G15210;AT5G44210	ERF8;ERF4;ERF9	TraesCS2D02G399000	C1	AT4G11660;AT5G62020	HSFB2B;HSFB2A	Y1H
TraesCS3D02G321500	C1	AT1G53170;AT3G15210;AT5G44210	ERF8;ERF4;ERF9	TraesCS2A02G401600	C1	AT4G11660;AT5G62020	HSFB2B;HSFB2A	Y1H
TraesCS2A02G089300	C1	AT3G22830;AT3G51910;AT3G63350;AT5G43840	HSFA6B;HSFA7A;HSFA7B;HSFA6A	TraesCS2D02G399000	C1	AT4G11660;AT5G62020	HSFB2B;HSFB2A	Y1H
TraesCS2A02G089300	C1	AT3G22830;AT3G51910;AT3G63350;AT5G43840	HSFA6B;HSFA7A;HSFA7B;HSFA6A	TraesCS2A02G401600	C1	AT4G11660;AT5G62020	HSFB2B;HSFB2A	Y1H
TraesCS5B02G440700	C1	AT3G22830;AT3G51910;AT3G63350;AT5G43840	HSFA6B;HSFA7A;HSFA7B;HSFA6A	TraesCS2D02G399000	C1	AT4G11660;AT5G62020	HSFB2B;HSFB2A	Y1H
TraesCS5B02G440700	C1	AT3G22830;AT3G51910;AT3G63350;AT5G43840	HSFA6B;HSFA7A;HSFA7B;HSFA6A	TraesCS2A02G401600	C1	AT4G11660;AT5G62020	HSFB2B;HSFB2A	Y1H
TraesCS2B02G105100	C1	AT3G22830;AT3G51910;AT3G63350;AT5G43840	HSFA6B;HSFA7A;HSFA7B;HSFA6A	TraesCS2D02G399000	C1	AT4G11660;AT5G62020	HSFB2B;HSFB2A	Y1H
TraesCS2B02G105100	C1	AT3G22830;AT3G51910;AT3G63350;AT5G43840	HSFA6B;HSFA7A;HSFA7B;HSFA6A	TraesCS2A02G401600	C1	AT4G11660;AT5G62020	HSFB2B;HSFB2A	Y1H
TraesCS5D02G445100	C1	AT3G22830;AT3G51910;AT3G63350;AT5G43840	HSFA6B;HSFA7A;HSFA7B;HSFA6A	TraesCS2D02G399000	C1	AT4G11660;AT5G62020	HSFB2B;HSFB2A	Y1H
TraesCS5D02G445100	C1	AT3G22830;AT3G51910;AT3G63350;AT5G43840	HSFA6B;HSFA7A;HSFA7B;HSFA6A	TraesCS2A02G401600	C1	AT4G11660;AT5G62020	HSFB2B;HSFB2A	Y1H
TraesCS4B02G278100	C1	AT3G22830;AT3G51910;AT3G63350;AT5G43840	HSFA6B;HSFA7A;HSFA7B;HSFA6A	TraesCS2D02G399000	C1	AT4G11660;AT5G62020	HSFB2B;HSFB2A	Y1H
TraesCS4B02G278100	C1	AT3G22830;AT3G51910;AT3G63350;AT5G43840	HSFA6B;HSFA7A;HSFA7B;HSFA6A	TraesCS2A02G401600	C1	AT4G11660;AT5G62020	HSFB2B;HSFB2A	Y1H
TraesCS4D02G276500	C1	AT3G22830;AT3G51910;AT3G63350;AT5G43840	HSFA6B;HSFA7A;HSFA7B;HSFA6A	TraesCS2D02G399000	C1	AT4G11660;AT5G62020	HSFB2B;HSFB2A	Y1H
TraesCS4D02G276500	C1	AT3G22830;AT3G51910;AT3G63350;AT5G43840	HSFA6B;HSFA7A;HSFA7B;HSFA6A	TraesCS2A02G401600	C1	AT4G11660;AT5G62020	HSFB2B;HSFB2A	Y1H
TraesCS1D02G382900	C1	AT3G22830;AT3G51910;AT3G63350;AT5G43840	HSFA6B;HSFA7A;HSFA7B;HSFA6A	TraesCS2D02G399000	C1	AT4G11660;AT5G62020	HSFB2B;HSFB2A	Y1H
TraesCS1D02G382900	C1	AT3G22830;AT3G51910;AT3G63350;AT5G43840	HSFA6B;HSFA7A;HSFA7B;HSFA6A	TraesCS2A02G401600	C1	AT4G11660;AT5G62020	HSFB2B;HSFB2A	Y1H
TraesCS1B02G396000	C1	AT3G22830;AT3G51910;AT3G63350;AT5G43840	HSFA6B;HSFA7A;HSFA7B;HSFA6A	TraesCS2D02G399000	C1	AT4G11660;AT5G62020	HSFB2B;HSFB2A	Y1H
TraesCS1B02G396000	C1	AT3G22830;AT3G51910;AT3G63350;AT5G43840	HSFA6B;HSFA7A;HSFA7B;HSFA6A	TraesCS2A02G401600	C1	AT4G11660;AT5G62020	HSFB2B;HSFB2A	Y1H
TraesCS1A02G375600	C1	AT3G22830;AT3G51910;AT3G63350;AT5G43840	HSFA6B;HSFA7A;HSFA7B;HSFA6A	TraesCS2D02G399000	C1	AT4G11660;AT5G62020	HSFB2B;HSFB2A	Y1H
TraesCS1A02G375600	C1	AT3G22830;AT3G51910;AT3G63350;AT5G43840	HSFA6B;HSFA7A;HSFA7B;HSFA6A	TraesCS2A02G401600	C1	AT4G11660;AT5G62020	HSFB2B;HSFB2A	Y1H
TraesCS5A02G437900	C1	AT3G22830;AT3G51910;AT3G63350;AT5G43840	HSFA6B;HSFA7A;HSFA7B;HSFA6A	TraesCS2D02G399000	C1	AT4G11660;AT5G62020	HSFB2B;HSFB2A	Y1H
TraesCS5A02G437900	C1	AT3G22830;AT3G51910;AT3G63350;AT5G43840	HSFA6B;HSFA7A;HSFA7B;HSFA6A	TraesCS2A02G401600	C1	AT4G11660;AT5G62020	HSFB2B;HSFB2A	Y1H
TraesCS2D02G399000	C1	AT4G11660;AT5G62020	HSFB2B;HSFB2A	TraesCS2D02G399000	C1	AT4G11660;AT5G62020	HSFB2B;HSFB2A	Y1H
TraesCS2D02G399000	C1	AT4G11660;AT5G62020	HSFB2B;HSFB2A	TraesCS2A02G401600	C1	AT4G11660;AT5G62020	HSFB2B;HSFB2A	Y1H
TraesCS2B02G419600	C1	AT4G11660;AT5G62020	HSFB2B;HSFB2A	TraesCS2D02G399000	C1	AT4G11660;AT5G62020	HSFB2B;HSFB2A	Y1H
TraesCS2B02G419600	C1	AT4G11660;AT5G62020	HSFB2B;HSFB2A	TraesCS2A02G401600	C1	AT4G11660;AT5G62020	HSFB2B;HSFB2A	Y1H
TraesCS2A02G401600	C1	AT4G11660;AT5G62020	HSFB2B;HSFB2A	TraesCS2D02G399000	C1	AT4G11660;AT5G62020	HSFB2B;HSFB2A	Y1H
TraesCS2A02G401600	C1	AT4G11660;AT5G62020	HSFB2B;HSFB2A	TraesCS2A02G401600	C1	AT4G11660;AT5G62020	HSFB2B;HSFB2A	Y1H
TraesCS2D02G165900	C6	AT1G14350;AT2G02820	MYB124;MYB88	TraesCS2A02G401600	C1	AT4G11660;AT5G62020	HSFB2B;HSFB2A	Y1H
TraesCS2A02G158900	C6	AT1G14350;AT2G02820	MYB124;MYB88	TraesCS2A02G401600	C1	AT4G11660;AT5G62020	HSFB2B;HSFB2A	Y1H
TraesCS2B02G184500	C2	AT1G14350;AT2G02820	MYB124;MYB88	TraesCS2A02G401600	C1	AT4G11660;AT5G62020	HSFB2B;HSFB2A	Y1H
TraesCS5A02G227100	C1	AT1G69600;AT3G28920;AT5G15210;AT5G39760;AT5G60480	ZHD11;ZHD9;ZHD8;ZHD10;ZHD12	TraesCS2D02G399000	C1	AT4G11660;AT5G62020	HSFB2B;HSFB2A	Y1H
TraesCS5D02G234600	C1	AT1G69600;AT3G28920;AT5G15210;AT5G39760;AT5G60480	ZHD11;ZHD9;ZHD8;ZHD10;ZHD12	TraesCS2D02G399000	C1	AT4G11660;AT5G62020	HSFB2B;HSFB2A	Y1H
TraesCS5B02G225700	C1	AT1G69600;AT3G28920;AT5G15210;AT5G39760;AT5G60480	ZHD11;ZHD9;ZHD8;ZHD10;ZHD12	TraesCS2D02G399000	C1	AT4G11660;AT5G62020	HSFB2B;HSFB2A	Y1H
TraesCS4A02G226800	C5	AT1G14687	ZHD14	TraesCS2D02G399000	C1	AT4G11660;AT5G62020	HSFB2B;HSFB2A	Y1H
TraesCS4D02G086300	C5	AT1G14687	ZHD14	TraesCS2D02G399000	C1	AT4G11660;AT5G62020	HSFB2B;HSFB2A	Y1H
TraesCS4B02G089700	C5	AT1G14687	ZHD14	TraesCS2D02G399000	C1	AT4G11660;AT5G62020	HSFB2B;HSFB2A	Y1H
TraesCS4B02G292900	C5	AT1G72570	AIL1	TraesCS5B02G236100	C1	AT1G46264	HSFB4	Y1H
TraesCS4A02G011600	C5	AT1G72570	AIL1	TraesCS5B02G236100	C1	AT1G46264	HSFB4	Y1H
TraesCS4A02G011600	C5	AT1G72570	AIL1	TraesCS5A02G237600	C1	AT1G46264	HSFB4	Y1H
TraesCS6B02G451300	C1	AT3G10480;AT3G10490;AT3G10500;AT5G04410	ANAC050;ANAC052;NAC053;NAC078	TraesCS5A02G237600	C1	AT1G46264	HSFB4	Y1H
TraesCSU02G135000	C4	AT3G10480;AT3G10490;AT3G10500;AT5G04410	ANAC050;ANAC052;NAC053;NAC078	TraesCS5A02G237600	C1	AT1G46264	HSFB4	Y1H
TraesCS7A02G526500	C1	AT2G23290;AT3G50060;AT4G37260;AT5G67300	AtMYB70;MYB77;MYB73;MYB44	TraesCS5B02G236100	C1	AT1G46264	HSFB4	Y1H
TraesCS7A02G526500	C1	AT2G23290;AT3G50060;AT4G37260;AT5G67300	AtMYB70;MYB77;MYB73;MYB44	TraesCS5A02G237600	C1	AT1G46264	HSFB4	Y1H
TraesCS6B02G201700	C2	AT2G23290;AT3G50060;AT4G37260;AT5G67300	AtMYB70;MYB77;MYB73;MYB44	TraesCS5B02G236100	C1	AT1G46264	HSFB4	Y1H
TraesCS6B02G201700	C2	AT2G23290;AT3G50060;AT4G37260;AT5G67300	AtMYB70;MYB77;MYB73;MYB44	TraesCS5A02G237600	C1	AT1G46264	HSFB4	Y1H
TraesCS6D02G162900	C2	AT2G23290;AT3G50060;AT4G37260;AT5G67300	AtMYB70;MYB77;MYB73;MYB44	TraesCS5B02G236100	C1	AT1G46264	HSFB4	Y1H
TraesCS6D02G162900	C2	AT2G23290;AT3G50060;AT4G37260;AT5G67300	AtMYB70;MYB77;MYB73;MYB44	TraesCS5A02G237600	C1	AT1G46264	HSFB4	Y1H
TraesCS6A02G173800	C2	AT2G23290;AT3G50060;AT4G37260;AT5G67300	AtMYB70;MYB77;MYB73;MYB44	TraesCS5B02G236100	C1	AT1G46264	HSFB4	Y1H
TraesCS6A02G173800	C2	AT2G23290;AT3G50060;AT4G37260;AT5G67300	AtMYB70;MYB77;MYB73;MYB44	TraesCS5A02G237600	C1	AT1G46264	HSFB4	Y1H
TraesCS7A02G526600	C2	AT2G23290;AT3G50060;AT4G37260;AT5G67300	AtMYB70;MYB77;MYB73;MYB44	TraesCS5B02G236100	C1	AT1G46264	HSFB4	Y1H
TraesCS7A02G526600	C2	AT2G23290;AT3G50060;AT4G37260;AT5G67300	AtMYB70;MYB77;MYB73;MYB44	TraesCS5A02G237600	C1	AT1G46264	HSFB4	Y1H
TraesCS1B02G235100	C1	AT3G11020;AT5G05410	DREB2B;DREB2A	TraesCS5B02G236100	C1	AT1G46264	HSFB4	Y1H
TraesCS1D02G223600	C1	AT3G11020;AT5G05410	DREB2B;DREB2A	TraesCS5B02G236100	C1	AT1G46264	HSFB4	Y1H
TraesCS1A02G221900	C1	AT3G11020;AT5G05410	DREB2B;DREB2A	TraesCS5B02G236100	C1	AT1G46264	HSFB4	Y1H
TraesCS3A02G099200	C4	AT3G11020;AT5G05410	DREB2B;DREB2A	TraesCS5B02G236100	C1	AT1G46264	HSFB4	Y1H
TraesCS3A02G099200	C4	AT3G11020;AT5G05410	DREB2B;DREB2A	TraesCS5D02G243900	C4	AT1G46264	HSFB4	Y1H
TraesCS7D02G170600	C1	AT1G21910;AT1G44830;AT1G77640	ERF012;ERF014;ERF013	TraesCS5B02G236100	C1	AT1G46264	HSFB4	Y1H
TraesCS7B02G074500	C1	AT1G21910;AT1G44830;AT1G77640	ERF012;ERF014;ERF013	TraesCS5B02G236100	C1	AT1G46264	HSFB4	Y1H
TraesCS7A02G169300	C1	AT1G21910;AT1G44830;AT1G77640	ERF012;ERF014;ERF013	TraesCS5B02G236100	C1	AT1G46264	HSFB4	Y1H
TraesCS6B02G361400	C4	AT1G21910;AT1G44830;AT1G77640	ERF012;ERF014;ERF013	TraesCS5D02G243900	C4	AT1G46264	HSFB4	Y1H
TraesCS6D02G309600	C4	AT1G21910;AT1G44830;AT1G77640	ERF012;ERF014;ERF013	TraesCS5B02G236100	C1	AT1G46264	HSFB4	Y1H
TraesCS6D02G309600	C4	AT1G21910;AT1G44830;AT1G77640	ERF012;ERF014;ERF013	TraesCS5D02G243900	C4	AT1G46264	HSFB4	Y1H
TraesCS5D02G185300	C5	AT1G25470;AT1G68550;AT3G25890	ERF116;ERF118;ERF119	TraesCS5B02G236100	C1	AT1G46264	HSFB4	Y1H
TraesCS5B02G178600	C5	AT1G25470;AT1G68550;AT3G25890	ERF116;ERF118;ERF119	TraesCS5B02G236100	C1	AT1G46264	HSFB4	Y1H
TraesCS5A02G180800	C5	AT1G25470;AT1G68550;AT3G25890	ERF116;ERF118;ERF119	TraesCS5B02G236100	C1	AT1G46264	HSFB4	Y1H
TraesCS3B02G357500	C1	AT1G53170;AT3G15210;AT5G44210	ERF8;ERF4;ERF9	TraesCS5B02G236100	C1	AT1G46264	HSFB4	Y1H
TraesCS1B02G326600	C1	AT1G53170;AT3G15210;AT5G44210	ERF8;ERF4;ERF9	TraesCS5B02G236100	C1	AT1G46264	HSFB4	Y1H
TraesCS3A02G328000	C1	AT1G53170;AT3G15210;AT5G44210	ERF8;ERF4;ERF9	TraesCS5B02G236100	C1	AT1G46264	HSFB4	Y1H
TraesCS1D02G314800	C1	AT1G53170;AT3G15210;AT5G44210	ERF8;ERF4;ERF9	TraesCS5B02G236100	C1	AT1G46264	HSFB4	Y1H
TraesCS1A02G314300	C1	AT1G53170;AT3G15210;AT5G44210	ERF8;ERF4;ERF9	TraesCS5B02G236100	C1	AT1G46264	HSFB4	Y1H
TraesCS3D02G321500	C1	AT1G53170;AT3G15210;AT5G44210	ERF8;ERF4;ERF9	TraesCS5B02G236100	C1	AT1G46264	HSFB4	Y1H
TraesCS2B02G118500	C2	AT1G76420	NAC031	TraesCS5A02G237600	C1	AT1G46264	HSFB4	Y1H
TraesCS2D02G100900	C3	AT1G76420	NAC031	TraesCS5A02G237600	C1	AT1G46264	HSFB4	Y1H
TraesCS4A02G130600	C3	AT1G76420	NAC031	TraesCS5A02G237600	C1	AT1G46264	HSFB4	Y1H
TraesCS4B02G174000	C3	AT1G76420	NAC031	TraesCS5A02G237600	C1	AT1G46264	HSFB4	Y1H
TraesCS7A02G264100	C4	AT1G43160;AT5G61890	RAP2-6;ERF114	TraesCS5B02G236100	C1	AT1G46264	HSFB4	Y1H
TraesCS7A02G264100	C4	AT1G43160;AT5G61890	RAP2-6;ERF114	TraesCS5D02G243900	C4	AT1G46264	HSFB4	Y1H
TraesCS7D02G265000	C4	AT1G43160;AT5G61890	RAP2-6;ERF114	TraesCS5D02G243900	C4	AT1G46264	HSFB4	Y1H
TraesCS5D02G283200	C3	AT2G24430	ANAC038	TraesCS4D02G332500	C3	AT3G24810;AT5G48820	KRP5;KRP3	Y1H
TraesCS5B02G275200	C3	AT2G24430	ANAC038	TraesCS4D02G332500	C3	AT3G24810;AT5G48820	KRP5;KRP3	Y1H
TraesCS5A02G275900	C3	AT2G24430	ANAC038	TraesCS4D02G332500	C3	AT3G24810;AT5G48820	KRP5;KRP3	Y1H
TraesCSU02G135000	C4	AT3G10480;AT3G10490;AT3G10500;AT5G04410	ANAC050;ANAC052;NAC053;NAC078	TraesCS4D02G332500	C3	AT3G24810;AT5G48820	KRP5;KRP3	Y1H
TraesCS6B02G201700	C2	AT2G23290;AT3G50060;AT4G37260;AT5G67300	AtMYB70;MYB77;MYB73;MYB44	TraesCS4D02G332500	C3	AT3G24810;AT5G48820	KRP5;KRP3	Y1H
TraesCS6D02G162900	C2	AT2G23290;AT3G50060;AT4G37260;AT5G67300	AtMYB70;MYB77;MYB73;MYB44	TraesCS4D02G332500	C3	AT3G24810;AT5G48820	KRP5;KRP3	Y1H
TraesCS6A02G173800	C2	AT2G23290;AT3G50060;AT4G37260;AT5G67300	AtMYB70;MYB77;MYB73;MYB44	TraesCS4D02G332500	C3	AT3G24810;AT5G48820	KRP5;KRP3	Y1H
TraesCS7B02G443900	C2	AT2G23290;AT3G50060;AT4G37260;AT5G67300	AtMYB70;MYB77;MYB73;MYB44	TraesCS4D02G332500	C3	AT3G24810;AT5G48820	KRP5;KRP3	Y1H
TraesCS7A02G526600	C2	AT2G23290;AT3G50060;AT4G37260;AT5G67300	AtMYB70;MYB77;MYB73;MYB44	TraesCS4D02G332500	C3	AT3G24810;AT5G48820	KRP5;KRP3	Y1H
TraesCS5A02G311300	C3	AT1G12610;AT1G63030;AT4G25470;AT4G25480;AT4G25490;AT5G51990	DREB1F;DREB1E;DREB1C;DREB1A;DREB1B;DREB1D	TraesCS4D02G332500	C3	AT3G24810;AT5G48820	KRP5;KRP3	Y1H
TraesCS5D02G318300	C3	AT1G12610;AT1G63030;AT4G25470;AT4G25480;AT4G25490;AT5G51990	DREB1F;DREB1E;DREB1C;DREB1A;DREB1B;DREB1D	TraesCS4D02G332500	C3	AT3G24810;AT5G48820	KRP5;KRP3	Y1H
TraesCS3A02G099200	C4	AT3G11020;AT5G05410	DREB2B;DREB2A	TraesCS4D02G332500	C3	AT3G24810;AT5G48820	KRP5;KRP3	Y1H
TraesCS3A02G099200	C4	AT3G11020;AT5G05410	DREB2B;DREB2A	TraesCS1B02G168900	C4	AT3G24810;AT5G48820	KRP5;KRP3	Y1H
TraesCS6A02G330500	C4	AT1G21910;AT1G44830;AT1G77640	ERF012;ERF014;ERF013	TraesCS4D02G332500	C3	AT3G24810;AT5G48820	KRP5;KRP3	Y1H
TraesCS6B02G361400	C4	AT1G21910;AT1G44830;AT1G77640	ERF012;ERF014;ERF013	TraesCS4D02G332500	C3	AT3G24810;AT5G48820	KRP5;KRP3	Y1H
TraesCS6B02G361400	C4	AT1G21910;AT1G44830;AT1G77640	ERF012;ERF014;ERF013	TraesCS1B02G168900	C4	AT3G24810;AT5G48820	KRP5;KRP3	Y1H
TraesCS6D02G309600	C4	AT1G21910;AT1G44830;AT1G77640	ERF012;ERF014;ERF013	TraesCS4D02G332500	C3	AT3G24810;AT5G48820	KRP5;KRP3	Y1H
TraesCS6D02G309600	C4	AT1G21910;AT1G44830;AT1G77640	ERF012;ERF014;ERF013	TraesCS1B02G168900	C4	AT3G24810;AT5G48820	KRP5;KRP3	Y1H
TraesCS2A02G158900	C6	AT1G14350;AT2G02820	MYB124;MYB88	TraesCS4D02G332500	C3	AT3G24810;AT5G48820	KRP5;KRP3	Y1H
TraesCS2B02G184500	C2	AT1G14350;AT2G02820	MYB124;MYB88	TraesCS4D02G332500	C3	AT3G24810;AT5G48820	KRP5;KRP3	Y1H
TraesCS7B02G364600	C3	AT1G56010;AT3G12977	NAC021;AT3G12977	TraesCS4D02G332500	C3	AT3G24810;AT5G48820	KRP5;KRP3	Y1H
TraesCS7D02G452500	C3	AT1G56010;AT3G12977	NAC021;AT3G12977	TraesCS4D02G332500	C3	AT3G24810;AT5G48820	KRP5;KRP3	Y1H
TraesCS7B02G365300	C3	AT1G56010;AT3G12977	NAC021;AT3G12977	TraesCS4D02G332500	C3	AT3G24810;AT5G48820	KRP5;KRP3	Y1H
TraesCS7D02G451700	C3	AT1G56010;AT3G12977	NAC021;AT3G12977	TraesCS4D02G332500	C3	AT3G24810;AT5G48820	KRP5;KRP3	Y1H
TraesCS7A02G464800	C3	AT1G56010;AT3G12977	NAC021;AT3G12977	TraesCS4D02G332500	C3	AT3G24810;AT5G48820	KRP5;KRP3	Y1H
TraesCS4B02G292900	C5	AT1G72570	AIL1	TraesCS2B02G239400	C1	AT2G04890;AT5G48150	SCL21;PAT1	Y1H
TraesCS4B02G292900	C5	AT1G72570	AIL1	TraesCS2D02G220200	C1	AT2G04890;AT5G48150	SCL21;PAT1	Y1H
TraesCS4B02G292900	C5	AT1G72570	AIL1	TraesCS2A02G214400	C1	AT2G04890;AT5G48150	SCL21;PAT1	Y1H
TraesCS4A02G011600	C5	AT1G72570	AIL1	TraesCS2B02G239400	C1	AT2G04890;AT5G48150	SCL21;PAT1	Y1H
TraesCS4A02G011600	C5	AT1G72570	AIL1	TraesCS2D02G220200	C1	AT2G04890;AT5G48150	SCL21;PAT1	Y1H
TraesCS4A02G011600	C5	AT1G72570	AIL1	TraesCS2A02G214400	C1	AT2G04890;AT5G48150	SCL21;PAT1	Y1H
TraesCS7A02G526500	C1	AT2G23290;AT3G50060;AT4G37260;AT5G67300	AtMYB70;MYB77;MYB73;MYB44	TraesCS2B02G239400	C1	AT2G04890;AT5G48150	SCL21;PAT1	Y1H
TraesCS7A02G526500	C1	AT2G23290;AT3G50060;AT4G37260;AT5G67300	AtMYB70;MYB77;MYB73;MYB44	TraesCS2D02G220200	C1	AT2G04890;AT5G48150	SCL21;PAT1	Y1H
TraesCS6B02G201700	C2	AT2G23290;AT3G50060;AT4G37260;AT5G67300	AtMYB70;MYB77;MYB73;MYB44	TraesCS2B02G239400	C1	AT2G04890;AT5G48150	SCL21;PAT1	Y1H
TraesCS6B02G201700	C2	AT2G23290;AT3G50060;AT4G37260;AT5G67300	AtMYB70;MYB77;MYB73;MYB44	TraesCS2D02G220200	C1	AT2G04890;AT5G48150	SCL21;PAT1	Y1H
TraesCS6D02G162900	C2	AT2G23290;AT3G50060;AT4G37260;AT5G67300	AtMYB70;MYB77;MYB73;MYB44	TraesCS2B02G239400	C1	AT2G04890;AT5G48150	SCL21;PAT1	Y1H
TraesCS6D02G162900	C2	AT2G23290;AT3G50060;AT4G37260;AT5G67300	AtMYB70;MYB77;MYB73;MYB44	TraesCS2D02G220200	C1	AT2G04890;AT5G48150	SCL21;PAT1	Y1H
TraesCS6A02G173800	C2	AT2G23290;AT3G50060;AT4G37260;AT5G67300	AtMYB70;MYB77;MYB73;MYB44	TraesCS2B02G239400	C1	AT2G04890;AT5G48150	SCL21;PAT1	Y1H
TraesCS6A02G173800	C2	AT2G23290;AT3G50060;AT4G37260;AT5G67300	AtMYB70;MYB77;MYB73;MYB44	TraesCS2D02G220200	C1	AT2G04890;AT5G48150	SCL21;PAT1	Y1H
TraesCS7A02G526600	C2	AT2G23290;AT3G50060;AT4G37260;AT5G67300	AtMYB70;MYB77;MYB73;MYB44	TraesCS2B02G239400	C1	AT2G04890;AT5G48150	SCL21;PAT1	Y1H
TraesCS7A02G526600	C2	AT2G23290;AT3G50060;AT4G37260;AT5G67300	AtMYB70;MYB77;MYB73;MYB44	TraesCS2D02G220200	C1	AT2G04890;AT5G48150	SCL21;PAT1	Y1H
TraesCS1B02G235100	C1	AT3G11020;AT5G05410	DREB2B;DREB2A	TraesCS2D02G220200	C1	AT2G04890;AT5G48150	SCL21;PAT1	Y1H
TraesCS1D02G223600	C1	AT3G11020;AT5G05410	DREB2B;DREB2A	TraesCS2D02G220200	C1	AT2G04890;AT5G48150	SCL21;PAT1	Y1H
TraesCS1A02G221900	C1	AT3G11020;AT5G05410	DREB2B;DREB2A	TraesCS2D02G220200	C1	AT2G04890;AT5G48150	SCL21;PAT1	Y1H
TraesCS3A02G099200	C4	AT3G11020;AT5G05410	DREB2B;DREB2A	TraesCS2D02G220200	C1	AT2G04890;AT5G48150	SCL21;PAT1	Y1H
TraesCS7D02G170600	C1	AT1G21910;AT1G44830;AT1G77640	ERF012;ERF014;ERF013	TraesCS2D02G220200	C1	AT2G04890;AT5G48150	SCL21;PAT1	Y1H
TraesCS7B02G074500	C1	AT1G21910;AT1G44830;AT1G77640	ERF012;ERF014;ERF013	TraesCS2D02G220200	C1	AT2G04890;AT5G48150	SCL21;PAT1	Y1H
TraesCS6D02G309600	C4	AT1G21910;AT1G44830;AT1G77640	ERF012;ERF014;ERF013	TraesCS2D02G220200	C1	AT2G04890;AT5G48150	SCL21;PAT1	Y1H
TraesCS3B02G365100	C2	AT3G12250;AT5G06950;AT5G06960	TGA6;TGA2;TGA5	TraesCS2D02G220200	C1	AT2G04890;AT5G48150	SCL21;PAT1	Y1H
TraesCS3D02G327600	C3	AT3G12250;AT5G06950;AT5G06960	TGA6;TGA2;TGA5	TraesCS2D02G220200	C1	AT2G04890;AT5G48150	SCL21;PAT1	Y1H
TraesCS3A02G334100	C1	AT3G12250;AT5G06950;AT5G06960	TGA6;TGA2;TGA5	TraesCS2D02G220200	C1	AT2G04890;AT5G48150	SCL21;PAT1	Y1H
TraesCS3D02G194800	C4	AT3G12250;AT5G06950;AT5G06960	TGA6;TGA2;TGA5	TraesCS2D02G220200	C1	AT2G04890;AT5G48150	SCL21;PAT1	Y1H
TraesCS3B02G220400	C4	AT3G12250;AT5G06950;AT5G06960	TGA6;TGA2;TGA5	TraesCS2D02G220200	C1	AT2G04890;AT5G48150	SCL21;PAT1	Y1H
TraesCSU02G135000	C4	AT3G10480;AT3G10490;AT3G10500;AT5G04410	ANAC050;ANAC052;NAC053;NAC078	TraesCS2B02G122500	C4	AT2G30470;AT4G32010	VAL1;VAL2	Y1H
TraesCS6A02G330500	C4	AT1G21910;AT1G44830;AT1G77640	ERF012;ERF014;ERF013	TraesCS2B02G122500	C4	AT2G30470;AT4G32010	VAL1;VAL2	Y1H
TraesCS6B02G361400	C4	AT1G21910;AT1G44830;AT1G77640	ERF012;ERF014;ERF013	TraesCS2B02G122500	C4	AT2G30470;AT4G32010	VAL1;VAL2	Y1H
TraesCS6D02G309600	C4	AT1G21910;AT1G44830;AT1G77640	ERF012;ERF014;ERF013	TraesCS2B02G122500	C4	AT2G30470;AT4G32010	VAL1;VAL2	Y1H
TraesCS7D02G452500	C3	AT1G56010;AT3G12977	NAC021;AT3G12977	TraesCS2B02G122500	C4	AT2G30470;AT4G32010	VAL1;VAL2	Y1H
TraesCS7D02G451700	C3	AT1G56010;AT3G12977	NAC021;AT3G12977	TraesCS2B02G122500	C4	AT2G30470;AT4G32010	VAL1;VAL2	Y1H
TraesCS7A02G464800	C3	AT1G56010;AT3G12977	NAC021;AT3G12977	TraesCS2B02G122500	C4	AT2G30470;AT4G32010	VAL1;VAL2	Y1H
TraesCS2D02G100900	C3	AT1G76420	NAC031	TraesCS2B02G122500	C4	AT2G30470;AT4G32010	VAL1;VAL2	Y1H
TraesCS2A02G101400	C3	AT1G76420	NAC031	TraesCS2B02G122500	C4	AT2G30470;AT4G32010	VAL1;VAL2	Y1H
TraesCS4A02G130600	C3	AT1G76420	NAC031	TraesCS2B02G122500	C4	AT2G30470;AT4G32010	VAL1;VAL2	Y1H
TraesCS2B02G118200	C3	AT1G76420	NAC031	TraesCS2B02G122500	C4	AT2G30470;AT4G32010	VAL1;VAL2	Y1H
TraesCS2B02G118400	C3	AT1G76420	NAC031	TraesCS2B02G122500	C4	AT2G30470;AT4G32010	VAL1;VAL2	Y1H
TraesCS4B02G174000	C3	AT1G76420	NAC031	TraesCS2B02G122500	C4	AT2G30470;AT4G32010	VAL1;VAL2	Y1H
TraesCS2B02G118500	C2	AT1G76420	NAC031	TraesCS2B02G122500	C4	AT2G30470;AT4G32010	VAL1;VAL2	Y1H
TraesCS2B02G122500	C4	AT2G30470;AT4G32010	VAL1;VAL2	TraesCS2B02G122500	C4	AT2G30470;AT4G32010	VAL1;VAL2	Y1H
TraesCS6A02G003800	C4	AT5G09330;AT5G64060	NAC082;anac103	TraesCS1D02G054000	C4	AT2G28610	WOX3	Y1H
TraesCS6A02G003800	C4	AT5G09330;AT5G64060	NAC082;anac103	TraesCS1B02G069000	C4	AT2G28610	WOX3	Y1H

## Sheet: Table S14
Table S14. The order of gene expression.
GeneID	Rank
TraesCS6A02G061300	1
TraesCS3D02G332400	2
TraesCS6D02G042500	3
TraesCS5A02G029900	4
TraesCS3A02G053700	5
TraesCS7D02G303200	6
TraesCS5B02G058200	7
TraesCS5D02G393000	8
TraesCS5D02G451900	9
TraesCS3D02G474500	10
TraesCS5A02G404600	11
TraesCS3A02G047800	12
TraesCS3A02G145300	13
TraesCS3B02G408300	14
TraesCS5D02G478900	15
TraesCS6A02G316800	16
TraesCS4A02G013300	17
TraesCS2B02G262400	18
TraesCS5D02G435000	19
TraesCS4D02G199500	20
TraesCS2B02G422000	21
TraesCS7A02G215700	22
TraesCS2B02G226600	23
TraesCS7A02G547500	24
TraesCS2A02G173100	25
TraesCS1A02G121400	26
TraesCS5D02G353200	27
TraesCS1A02G298700	28
TraesCS7D02G148600	29
TraesCS7A02G196800	30
TraesCS5A02G077900	31
TraesCS2B02G199000	32
TraesCS1B02G060300	33
TraesCS1B02G124200	34
TraesCS2B02G343900	35
TraesCS4A02G445100	36
TraesCS4D02G208400	37
TraesCS7D02G319900	38
TraesCS3B02G392600	39
TraesCS5A02G427800	40
TraesCS7D02G129700	41
TraesCS6A02G328800	42
TraesCS2B02G468200	43
TraesCS4B02G115600	44
TraesCS3B02G328900	45
TraesCS5D02G300000	46
TraesCS3D02G327500	47
TraesCS1A02G420600	48
TraesCS1D02G157100	49
TraesCS3B02G409300	50
TraesCS5B02G494500	51
TraesCS5A02G262600	52
TraesCS1A02G220500	53
TraesCS3B02G219400	54
TraesCS7D02G516200	55
TraesCS3B02G210800	56
TraesCS1D02G334200	57
TraesCS1A02G235800	58
TraesCS1A02G280900	59
TraesCS4A02G218700	60
TraesCS5A02G203500	61
TraesCS4B02G141500	62
TraesCS5A02G508700	63
TraesCS3A02G179800	64
TraesCS6B02G077900	65
TraesCS3D02G185500	66
TraesCS7A02G507900	67
TraesCS3B02G475800	68
TraesCS4A02G064000	69
TraesCS3B02G200900	70
TraesCS1D02G306000	71
TraesCS5A02G194900	72
TraesCSU02G267800	73
TraesCS7D02G485700	74
TraesCS5B02G192500	75
TraesCS2A02G307900	76
TraesCS5B02G257400	77
TraesCS3B02G434300	78
TraesCS2B02G414900	79
TraesCS1A02G409100	80
TraesCS6A02G034300	81
TraesCS3B02G155600	82
TraesCS1B02G184000	83
TraesCS6B02G370900	84
TraesCS7D02G097600	85
TraesCS4B02G181600	86
TraesCS3D02G532700	87
TraesCS2A02G283800	88
TraesCS6A02G063200	89
TraesCS6B02G317300	90
TraesCS7D02G273600	91
TraesCS5B02G276600	92
TraesCS2A02G502200	93
TraesCS4A02G368100	94
TraesCS5D02G308500	95
TraesCS4B02G219700	96
TraesCS3A02G373800	97
TraesCS1B02G337200	98
TraesCS3D02G247300	99
TraesCS1A02G388800	100
TraesCS4A02G338400	101
TraesCS5B02G190300	102
TraesCS7B02G316500	103
TraesCS2D02G004200	104
TraesCS7A02G490400	105
TraesCS7A02G432000	106
TraesCS6B02G330700	107
TraesCS3D02G128300	108
TraesCS3D02G168700	109
TraesCS1D02G247600	110
TraesCS2D02G447500	111
TraesCS2D02G600100	112
TraesCS2A02G401800	113
TraesCS4A02G499928	114
TraesCS2D02G504000	115
TraesCS4A02G282500	116
TraesCS6D02G377200	117
TraesCS2A02G398900	118
TraesCS7A02G338900	119
TraesCS1B02G186700	120
TraesCS1B02G459600	121
TraesCS6D02G014400	122
TraesCS7D02G311500	123
TraesCS3B02G272400	124
TraesCS5B02G243500	125
TraesCS1B02G137100	126
TraesCS7A02G278400	127
TraesCS4A02G116100	128
TraesCS5B02G411900	129
TraesCS6B02G048600	130
TraesCS3A02G390200	131
TraesCS5B02G517500	132
TraesCS4B02G127500	133
TraesCS1A02G396700	134
TraesCS2D02G397700	135
TraesCS1D02G340700	136
TraesCS5B02G320500	137
TraesCS4A02G194100	138
TraesCS3A02G169100	139
TraesCS5B02G381700	140
TraesCS5A02G435800	141
TraesCS4B02G083100	142
TraesCS1A02G244700	143
TraesCS6D02G094200	144
TraesCS4A02G261900	145
TraesCS5A02G503500	146
TraesCS3B02G476000	147
TraesCS7B02G399500	148
TraesCS5B02G399900	149
TraesCS2B02G046700	150
TraesCS1B02G284400	151
TraesCS5B02G023400	152
TraesCS1A02G266700	153
TraesCS5D02G382700	154
TraesCS2A02G022700	155
TraesCS5A02G080300	156
TraesCS6B02G375600	157
TraesCS4B02G003400	158
TraesCS6A02G034500	159
TraesCS4D02G260800	160
TraesCS3D02G539300	161
TraesCS6D02G046200	162
TraesCS4D02G124800	163
TraesCS3B02G205400	164
TraesCS2A02G221300	165
TraesCS4A02G481400	166
TraesCS5B02G097600	167
TraesCS2D02G565200	168
TraesCS7B02G100200	169
TraesCS4A02G366200	170
TraesCS6B02G460100	171
TraesCS6B02G226200	172
TraesCS5B02G131500	173
TraesCS3D02G164200	174
TraesCS7B02G116100	175
TraesCS5B02G238400	176
TraesCS3A02G394100	177
TraesCS5A02G075300	178
TraesCS7D02G387700	179
TraesCS6B02G216900	180
TraesCS6B02G263600	181
TraesCS6D02G346400	182
TraesCS3B02G014900	183
TraesCS7D02G471600	184
TraesCS3A02G134000	185
TraesCS1D02G254800	186
TraesCS7D02G063500	187
TraesCS3A02G241300	188
TraesCS6B02G327800	189
TraesCS5B02G246400	190
TraesCS5D02G341700	191
TraesCS6B02G074000	192
TraesCS1D02G442500	193
TraesCS5B02G200900	194
TraesCS6D02G066200	195
TraesCS2B02G469000	196
TraesCS6D02G041700	197
TraesCS6D02G224900	198
TraesCS2A02G276000	199
TraesCS1A02G217100	200
TraesCS7B02G224000	201
TraesCS5B02G372000	202
TraesCS5A02G089600	203
TraesCS7B02G149900	204
TraesCS5B02G028200	205
TraesCS7B02G183300	206
TraesCS5D02G129900	207
TraesCS1A02G348700	208
TraesCS2D02G395400	209
TraesCS4A02G097700	210
TraesCS2B02G352000	211
TraesCS3A02G239400	212
TraesCS2A02G583500	213
TraesCS5A02G394800	214
TraesCS1D02G175900	215
TraesCS6B02G136500	216
TraesCS6A02G373800	217
TraesCS3D02G381900	218
TraesCS3B02G489000	219
TraesCS7D02G438700	220
TraesCS3A02G297500	221
TraesCS1D02G079100	222
TraesCS5B02G084400	223
TraesCS3D02G110900	224
TraesCS6A02G340300	225
TraesCS6D02G144900	226
TraesCS2D02G025400	227
TraesCS5B02G117100	228
TraesCS6D02G334000	229
TraesCS6D02G403900	230
TraesCS5A02G025200	231
TraesCS1D02G418000	232
TraesCS5A02G124700	233
TraesCS2D02G217300	234
TraesCS5B02G503200	235
TraesCS3D02G396200	236
TraesCS1B02G085000	237
TraesCS4D02G038800	238
TraesCS2B02G568400	239
TraesCS6D02G306700	240
TraesCS5D02G406600	241
TraesCS1A02G250700	242
TraesCS7A02G394400	243
TraesCS4D02G173100	244
TraesCS2B02G167900	245
TraesCS3A02G393400	246
TraesCS2B02G510100	247
TraesCS4D02G349600	248
TraesCS7B02G334100	249
TraesCS4A02G044500	250
TraesCS2B02G090600	251
TraesCS7D02G368200	252
TraesCS5A02G347900	253
TraesCS3D02G400000	254
TraesCS6B02G049400	255
TraesCS4A02G084200	256
TraesCS2A02G089300	257
TraesCS1B02G364400	258
TraesCS4A02G183700	259
TraesCS5A02G402300	260
TraesCS3A02G535300	261
TraesCS2B02G332700	262
TraesCS2B02G227000	263
TraesCS3B02G458800	264
TraesCS4D02G135400	265
TraesCS2D02G284200	266
TraesCS2B02G065500	267
TraesCS5B02G448400	268
TraesCS4B02G043500	269
TraesCS4D02G082700	270
TraesCS2B02G175800	271
TraesCS4A02G103300	272
TraesCS3A02G376800	273
TraesCS1A02G286900	274
TraesCS7D02G292400	275
TraesCS4A02G181600	276
TraesCS4A02G367400	277
TraesCS5D02G400000	278
TraesCS2B02G520500	279
TraesCS3A02G038400	280
TraesCS3D02G388400	281
TraesCS1D02G103800	282
TraesCS3B02G135700	283
TraesCS2D02G100300	284
TraesCS4A02G405600	285
TraesCS7A02G236800	286
TraesCS1D02G270900	287
TraesCS7D02G452700	288
TraesCS4B02G299700	289
TraesCS5A02G347800	290
TraesCS1A02G338200	291
TraesCS7D02G485600	292
TraesCS1A02G026200	293
TraesCS5B02G484800	294
TraesCS5D02G279100	295
TraesCS7D02G403400	296
TraesCS3A02G238400	297
TraesCS5B02G183700	298
TraesCS4A02G326100	299
TraesCS5B02G194600	300
TraesCS3D02G369800	301
TraesCS3B02G442700	302
TraesCS3B02G380500	303
TraesCS3B02G209900	304
TraesCS2D02G389900	305
TraesCS5D02G453700	306
TraesCS5D02G141900	307
TraesCS2D02G179800	308
TraesCS4D02G112200	309
TraesCS5D02G190700	310
TraesCS5D02G144600	311
TraesCS6A02G213200	312
TraesCS5B02G471400	313
TraesCS6D02G106800	314
TraesCS5D02G261400	315
TraesCS3A02G347200	316
TraesCS7B02G237100	317
TraesCS4B02G019600	318
TraesCS4B02G044700	319
TraesCS5A02G166200	320
TraesCS3B02G137100	321
TraesCS4B02G030800	322
TraesCS3B02G257700	323
TraesCS5A02G175200	324
TraesCS6D02G193000	325
TraesCS5A02G140800	326
TraesCS2D02G128400	327
TraesCS5D02G071800	328
TraesCS3D02G107500	329
TraesCS1D02G286700	330
TraesCS2D02G303400	331
TraesCS1A02G273100	332
TraesCS2A02G448000	333
TraesCS7A02G205700	334
TraesCS3B02G474900	335
TraesCS6B02G134800	336
TraesCS2B02G507100	337
TraesCS3A02G477100	338
TraesCS5D02G147600	339
TraesCS2B02G556900	340
TraesCSU02G175000	341
TraesCS6B02G145200	342
TraesCS5B02G519400	343
TraesCS4B02G224300	344
TraesCS4B02G216700	345
TraesCS2A02G184400	346
TraesCS4B02G254000	347
TraesCS4A02G099800	348
TraesCS6D02G109500	349
TraesCS1D02G201300	350
TraesCS5D02G143000	351
TraesCS6D02G063300	352
TraesCS6D02G223800	353
TraesCS1D02G419500	354
TraesCS7D02G247900	355
TraesCS2D02G220500	356
TraesCS7D02G552700	357
TraesCS3D02G288800	358
TraesCS7B02G382800	359
TraesCS1A02G128500	360
TraesCS4B02G198600	361
TraesCS5B02G145100	362
TraesCS7A02G336200	363
TraesCS4A02G036400	364
TraesCS6B02G286100	365
TraesCS5D02G247700	366
TraesCSU02G077400	367
TraesCS5D02G105200	368
TraesCS4A02G415000	369
TraesCS4D02G198800	370
TraesCS2D02G431000	371
TraesCS5D02G023600	372
TraesCS2A02G327700	373
TraesCS1D02G096500	374
TraesCS3B02G452000	375
TraesCS4A02G110900	376
TraesCS4B02G261100	377
TraesCS7B02G215500	378
TraesCS3D02G131000	379
TraesCS3A02G075600	380
TraesCS1D02G194700	381
TraesCS6A02G335900	382
TraesCS3B02G126900	383
TraesCS3D02G429500	384
TraesCS2B02G217400	385
TraesCS7B02G239300	386
TraesCS6A02G282400	387
TraesCS1D02G423800	388
TraesCS2D02G248400	389
TraesCS3A02G073000	390
TraesCS7D02G454500	391
TraesCS6B02G365200	392
TraesCS2A02G150000	393
TraesCS5A02G199200	394
TraesCS3A02G337200	395
TraesCS7D02G153600	396
TraesCS1A02G001600	397
TraesCS7B02G061800	398
TraesCS1D02G100900	399
TraesCS7A02G347800	400
TraesCS2D02G370500	401
TraesCS5A02G088700	402
TraesCS5D02G244600	403
TraesCS2A02G349300	404
TraesCS7D02G467500	405
TraesCS4A02G355400	406
TraesCS2B02G469100	407
TraesCS7A02G333600	408
TraesCS3A02G230000	409
TraesCS1D02G034100	410
TraesCS2B02G405200	411
TraesCS7A02G476200	412
TraesCS5D02G232100	413
TraesCS5D02G381600	414
TraesCS7B02G257400	415
TraesCS5A02G443800	416
TraesCS2D02G356600	417
TraesCS2B02G096000	418
TraesCS5D02G014700	419
TraesCS7A02G193700	420
TraesCS1B02G427700	421
TraesCS1B02G208400	422
TraesCS1A02G231700	423
TraesCS3A02G396400	424
TraesCS7D02G173000	425
TraesCS1B02G465000	426
TraesCS3A02G442000	427
TraesCS5A02G416000	428
TraesCS5A02G094400	429
TraesCS2D02G238600	430
TraesCS3B02G252900	431
TraesCS4B02G220000	432
TraesCS7D02G036800	433
TraesCS4A02G430600	434
TraesCS3A02G132400	435
TraesCS4D02G176700	436
TraesCS2D02G097100	437
TraesCS5A02G167100	438
TraesCS1B02G431400	439
TraesCS3D02G434700	440
TraesCS4A02G259100	441
TraesCS6A02G242600	442
TraesCS7A02G322200	443
TraesCS7D02G414000	444
TraesCS4B02G178700	445
TraesCS5B02G145700	446
TraesCS1D02G428300	447
TraesCS1A02G215300	448
TraesCS1B02G296300	449
TraesCS2D02G131300	450
TraesCS2D02G181100	451
TraesCS1D02G002200	452
TraesCS2B02G130000	453
TraesCS5A02G286200	454
TraesCS7D02G217500	455
TraesCS4A02G498700	456
TraesCS4D02G317100	457
TraesCS3A02G388800	458
TraesCS4B02G032500	459
TraesCS5D02G168600	460
TraesCS1B02G213600	461
TraesCS6D02G040200	462
TraesCS2A02G404100	463
TraesCS1D02G007800	464
TraesCS7D02G257300	465
TraesCS3A02G119100	466
TraesCS3B02G450600	467
TraesCSU02G077200	468
TraesCS4A02G015500	469
TraesCS2B02G271900	470
TraesCS6B02G082600	471
TraesCS2D02G154500	472
TraesCS7B02G465000	473
TraesCS4D02G220100	474
TraesCS7D02G037500	475
TraesCS5D02G208700	476
TraesCS6B02G116000	477
TraesCS2D02G251300	478
TraesCS2A02G426000	479
TraesCS1D02G416100	480
TraesCS6B02G219400	481
TraesCS7B02G283200	482
TraesCS7A02G167100	483
TraesCS3A02G491500	484
TraesCS2B02G272300	485
TraesCS7A02G316500	486
TraesCS3A02G293700	487
TraesCS4A02G339500	488
TraesCS3B02G390900	489
TraesCS3A02G305400	490
TraesCS6A02G303800	491
TraesCS7A02G266500	492
TraesCS5D02G367700	493
TraesCS6A02G234500	494
TraesCS6D02G358600	495
TraesCS5A02G444300	496
TraesCS2A02G373600	497
TraesCS7D02G359100	498
TraesCS7D02G386600	499
TraesCS5D02G087500	500
TraesCS4A02G289400	501
TraesCS6D02G296300	502
TraesCS7B02G195300	503
TraesCS1B02G095800	504
TraesCS5A02G161500	505
TraesCS2D02G382700	506
TraesCS5D02G132500	507
TraesCS3A02G380900	508
TraesCS7B02G355700	509
TraesCS5B02G095800	510
TraesCS5D02G122400	511
TraesCS5D02G236400	512
TraesCS7B02G137700	513
TraesCS4D02G253900	514
TraesCS5D02G317400	515
TraesCS6B02G328100	516
TraesCS5B02G175500	517
TraesCS7D02G278900	518
TraesCS1A02G122500	519
TraesCS3B02G138100	520
TraesCS4A02G452600	521
TraesCS2D02G166500	522
TraesCS3D02G271300	523
TraesCS1A02G402600	524
TraesCS2A02G317300	525
TraesCS2D02G347800	526
TraesCS3B02G146300	527
TraesCS4B02G197000	528
TraesCS5D02G194100	529
TraesCS7A02G257000	530
TraesCS7A02G278000	531
TraesCS5D02G322800	532
TraesCS2B02G509400	533
TraesCS2B02G254000	534
TraesCS1B02G190900	535
TraesCS7D02G534500	536
TraesCS7B02G277800	537
TraesCS2D02G226700	538
TraesCS3B02G608800	539
TraesCS6A02G034600	540
TraesCS2A02G542400	541
TraesCS5B02G175400	542
TraesCS4A02G094000	543
TraesCS2D02G157100	544
TraesCS6D02G284700	545
TraesCS3D02G485500	546
TraesCS2A02G532200	547
TraesCS7B02G150700	548
TraesCS3A02G408800	549
TraesCS7A02G471000	550
TraesCS6D02G197500	551
TraesCS7D02G320400	552
TraesCSU02G021700	553
TraesCS3A02G451200	554
TraesCS5B02G199200	555
TraesCS3D02G242300	556
TraesCS4D02G177400	557
TraesCS4A02G367900	558
TraesCS7D02G278000	559
TraesCS4B02G043100	560
TraesCS3B02G000700	561
TraesCS5A02G170000	562
TraesCS1B02G192900	563
TraesCS3B02G425000	564
TraesCS3B02G183000	565
TraesCS1D02G340400	566
TraesCS7B02G360400	567
TraesCS6D02G016300	568
TraesCS7D02G341800	569
TraesCS7D02G499800	570
TraesCS6D02G183000	571
TraesCS5B02G163200	572
TraesCS4D02G330100	573
TraesCS4A02G126600	574
TraesCS7D02G251600	575
TraesCS5B02G401900	576
TraesCS7A02G132700	577
TraesCS4A02G035500	578
TraesCS3D02G327000	579
TraesCS3A02G102500	580
TraesCS6D02G274600	581
TraesCS3D02G288200	582
TraesCS3B02G588500	583
TraesCS5D02G551800	584
TraesCS1A02G427400	585
TraesCS2B02G324400	586
TraesCS5B02G409400	587
TraesCS6B02G099300	588
TraesCS7D02G295100	589
TraesCS2A02G374100	590
TraesCS6B02G279200	591
TraesCS2D02G462800	592
TraesCS3B02G428400	593
TraesCS1A02G001800	594
TraesCS5D02G564700	595
TraesCS4D02G129300	596
TraesCS2B02G045700	597
TraesCS1A02G201300	598
TraesCS5B02G389000	599
TraesCS4D02G342700	600
TraesCS4B02G038000	601
TraesCS3A02G324600	602
TraesCS4D02G341800	603
TraesCS2D02G537300	604
TraesCS1A02G117000	605
TraesCS2D02G057000	606
TraesCS3D02G271800	607
TraesCS3D02G107600	608
TraesCS6D02G153200	609
TraesCS3D02G109300	610
TraesCS2A02G396600	611
TraesCS3B02G348800	612
TraesCS6B02G078600	613
TraesCS4A02G423500	614
TraesCS6D02G107000	615
TraesCS2D02G213000	616
TraesCS2B02G188800	617
TraesCS7D02G477300	618
TraesCS4B02G064600	619
TraesCS1A02G144700	620
TraesCS6A02G035200	621
TraesCS4B02G154400	622
TraesCS2D02G409900	623
TraesCS3D02G377300	624
TraesCS6D02G355000	625
TraesCS2D02G210300	626
TraesCS2D02G309000	627
TraesCS2D02G359400	628
TraesCS7A02G188700	629
TraesCS3A02G415400	630
TraesCS7D02G403700	631
TraesCS5A02G364200	632
TraesCS4D02G211200	633
TraesCS2D02G162300	634
TraesCS5D02G504200	635
TraesCS7A02G300000	636
TraesCS5D02G323400	637
TraesCS6A02G347800	638
TraesCS3D02G540600	639
TraesCS1B02G371600	640
TraesCS2D02G492600	641
TraesCS5A02G321100	642
TraesCS6A02G107900	643
TraesCS5A02G372100	644
TraesCS3A02G138000	645
TraesCS7D02G167000	646
TraesCS2B02G239600	647
TraesCS5D02G451200	648
TraesCS3A02G128700	649
TraesCS3A02G239600	650
TraesCS6B02G317600	651
TraesCS7D02G343700	652
TraesCS7A02G501100	653
TraesCS6A02G278100	654
TraesCS7D02G204900	655
TraesCS4D02G147200	656
TraesCS3A02G238200	657
TraesCS2A02G387400	658
TraesCS7B02G018600	659
TraesCS5B02G496400	660
TraesCS6A02G358400	661
TraesCS6B02G434300	662
TraesCS3B02G113100	663
TraesCS3D02G161900	664
TraesCS4A02G060400	665
TraesCS3D02G165400	666
TraesCS5D02G188300	667
TraesCS1B02G222500	668
TraesCS5A02G493300	669
TraesCS5D02G484800	670
TraesCS1A02G173200	671
TraesCS7B02G373700	672
TraesCS2D02G262300	673
TraesCS5B02G236100	674
TraesCS1B02G370500	675
TraesCS3A02G330900	676
TraesCS2A02G156400	677
TraesCS6A02G055400	678
TraesCS1D02G074400	679
TraesCS6D02G250700	680
TraesCS4A02G277400	681
TraesCS3A02G024900	682
TraesCS5D02G169900	683
TraesCS3A02G168300	684
TraesCS6B02G079400	685
TraesCS2A02G314900	686
TraesCS4A02G414100	687
TraesCSU02G018500	688
TraesCS3D02G189400	689
TraesCS5B02G202200	690
TraesCS5D02G346100	691
TraesCS7D02G461300	692
TraesCS5A02G185700	693
TraesCS5D02G452000	694
TraesCS6B02G210900	695
TraesCS3A02G403800	696
TraesCS5B02G067700	697
TraesCS5A02G308600	698
TraesCS3A02G055600	699
TraesCS6B02G081900	700
TraesCS7A02G049100	701
TraesCS5A02G396400	702
TraesCS1A02G000700	703
TraesCS1A02G247500	704
TraesCS7D02G044200	705
TraesCS2B02G204100	706
TraesCS5B02G211900	707
TraesCS7D02G126300	708
TraesCS1A02G323300	709
TraesCS1D02G343400	710
TraesCS1D02G204700	711
TraesCS1B02G354000	712
TraesCS6D02G352300	713
TraesCS5A02G051900	714
TraesCS4B02G068200	715
TraesCS7A02G299600	716
TraesCS2A02G205200	717
TraesCS7A02G317400	718
TraesCS7D02G294600	719
TraesCS1B02G456700	720
TraesCS4B02G193500	721
TraesCS2A02G310900	722
TraesCS4D02G327100	723
TraesCS7A02G526500	724
TraesCS2A02G581400	725
TraesCS2D02G155200	726
TraesCS3D02G450600	727
TraesCS3B02G276000	728
TraesCS3A02G171300	729
TraesCS7A02G052000	730
TraesCS6B02G059000	731
TraesCS1B02G167700	732
TraesCS1B02G287200	733
TraesCS7A02G265900	734
TraesCS5A02G462100	735
TraesCS1D02G205300	736
TraesCS3A02G104600	737
TraesCS4D02G308300	738
TraesCS5A02G030800	739
TraesCS7B02G226100	740
TraesCS5D02G496800	741
TraesCS4B02G182100	742
TraesCS7B02G169200	743
TraesCS6B02G347200	744
TraesCS6A02G268700	745
TraesCS6B02G287100	746
TraesCS5D02G238700	747
TraesCS1D02G440600	748
TraesCS7D02G335800	749
TraesCS3D02G343800	750
TraesCS5D02G085500	751
TraesCS3A02G317600	752
TraesCS7D02G266300	753
TraesCS3D02G164000	754
TraesCS1D02G175000	755
TraesCS4A02G125400	756
TraesCS1D02G221500	757
TraesCS7D02G038800	758
TraesCS7A02G450600	759
TraesCS4B02G306500	760
TraesCS5D02G568500	761
TraesCS5B02G437500	762
TraesCS2D02G071400	763
TraesCS2B02G390600	764
TraesCS1B02G193800	765
TraesCS1B02G366900	766
TraesCS6D02G122600	767
TraesCS7B02G163800	768
TraesCS7D02G157900	769
TraesCS2A02G469400	770
TraesCS7A02G312300	771
TraesCS1A02G323800	772
TraesCS4A02G070500	773
TraesCS4A02G002000	774
TraesCS1D02G118100	775
TraesCS2D02G326600	776
TraesCS5B02G389400	777
TraesCS1B02G013900	778
TraesCS1A02G112400	779
TraesCS1D02G382400	780
TraesCS5B02G159100	781
TraesCS4D02G214300	782
TraesCS5A02G445800	783
TraesCS4A02G278000	784
TraesCS2A02G475600	785
TraesCS2D02G299600	786
TraesCS3A02G434400	787
TraesCS1B02G424500	788
TraesCS3B02G123300	789
TraesCS3A02G096200	790
TraesCS3D02G279900	791
TraesCS6A02G269500	792
TraesCS5B02G216600	793
TraesCS4B02G224800	794
TraesCS7D02G500900	795
TraesCS1B02G442000	796
TraesCS5A02G504700	797
TraesCS3D02G162900	798
TraesCS5A02G202300	799
TraesCS5A02G275700	800
TraesCS3D02G325800	801
TraesCS2A02G386400	802
TraesCS7B02G309600	803
TraesCS5B02G153600	804
TraesCS5D02G133300	805
TraesCS2B02G194900	806
TraesCS7B02G256500	807
TraesCS7D02G284900	808
TraesCS5A02G029600	809
TraesCS5B02G531900	810
TraesCS3A02G173600	811
TraesCS7B02G135700	812
TraesCS1B02G304700	813
TraesCS6D02G368900	814
TraesCS3A02G244400	815
TraesCS1B02G176500	816
TraesCS1B02G415500	817
TraesCS6B02G135700	818
TraesCS6B02G115800	819
TraesCS2D02G332700	820
TraesCS4B02G045300	821
TraesCS4D02G180300	822
TraesCS7B02G455000	823
TraesCS7D02G414700	824
TraesCS6D02G268000	825
TraesCS2D02G271800	826
TraesCS2A02G297600	827
TraesCS6B02G393700	828
TraesCS6B02G092400	829
TraesCS3B02G293100	830
TraesCS7A02G431600	831
TraesCS5D02G353400	832
TraesCS5A02G416500	833
TraesCS3A02G164800	834
TraesCS6D02G248400	835
TraesCS2D02G218700	836
TraesCS5D02G331100	837
TraesCS7D02G221900	838
TraesCS1A02G301600	839
TraesCS7A02G435300	840
TraesCS2B02G174500	841
TraesCS4D02G127600	842
TraesCS5D02G507800	843
TraesCS5A02G319000	844
TraesCS5D02G566200	845
TraesCS6D02G401700	846
TraesCS2A02G169100	847
TraesCS5A02G468600	848
TraesCS7A02G172300	849
TraesCS7D02G419900	850
TraesCS3A02G159600	851
TraesCS5D02G308100	852
TraesCS6B02G117700	853
TraesCS2A02G298100	854
TraesCS6A02G034800	855
TraesCS6A02G031600	856
TraesCS2B02G262900	857
TraesCS3A02G352900	858
TraesCS2A02G309900	859
TraesCS5A02G265400	860
TraesCS6B02G084900	861
TraesCS4D02G032700	862
TraesCS1A02G195500	863
TraesCS5A02G472900	864
TraesCS3D02G314100	865
TraesCS3D02G341300	866
TraesCS7D02G492000	867
TraesCS6B02G352100	868
TraesCS5B02G507500	869
TraesCS4D02G217000	870
TraesCS3A02G113600	871
TraesCS4B02G360900	872
TraesCS1D02G055900	873
TraesCS4D02G174500	874
TraesCS5B02G456400	875
TraesCS5D02G142100	876
TraesCS7A02G331100	877
TraesCS5B02G060300	878
TraesCS2B02G314600	879
TraesCS7D02G464800	880
TraesCS4A02G090600	881
TraesCS6D02G278100	882
TraesCS7D02G385800	883
TraesCS4D02G287600	884
TraesCS3A02G102400	885
TraesCS2D02G487100	886
TraesCS2B02G321800	887
TraesCS5D02G455500	888
TraesCS1B02G125400	889
TraesCS5A02G079100	890
TraesCS4D02G251800	891
TraesCS3B02G064600	892
TraesCS1A02G278300	893
TraesCS7B02G048600	894
TraesCS4A02G358800	895
TraesCS1D02G259100	896
TraesCS1A02G153600	897
TraesCS6A02G040200	898
TraesCS5B02G035800	899
TraesCS6A02G042700	900
TraesCS2D02G375900	901
TraesCS5B02G243700	902
TraesCS3D02G427700	903
TraesCS4B02G288400	904
TraesCS1D02G197500	905
TraesCS4B02G295200	906
TraesCS5D02G431800	907
TraesCS5D02G089700	908
TraesCS3D02G527900	909
TraesCS4A02G156700	910
TraesCS3A02G433300	911
TraesCS3B02G243400	912
TraesCS3B02G498800	913
TraesCS1A02G331700	914
TraesCS2D02G499700	915
TraesCS3D02G309700	916
TraesCS2A02G086900	917
TraesCS7A02G477300	918
TraesCS2D02G330100	919
TraesCS5B02G398300	920
TraesCS2D02G074300	921
TraesCS3B02G455100	922
TraesCS3A02G492400	923
TraesCS3B02G268000	924
TraesCS4A02G209100	925
TraesCS1D02G126300	926
TraesCS4B02G171800	927
TraesCS2A02G492300	928
TraesCS4D02G000800	929
TraesCS5D02G516900	930
TraesCSU02G182800	931
TraesCS7A02G268500	932
TraesCS6B02G423500	933
TraesCS4A02G062900	934
TraesCS2B02G359600	935
TraesCS4B02G213400	936
TraesCS5A02G198800	937
TraesCS3D02G350700	938
TraesCS2D02G271900	939
TraesCS2A02G096600	940
TraesCS6B02G282200	941
TraesCS1A02G184100	942
TraesCS6B02G049500	943
TraesCS4A02G367800	944
TraesCS3B02G266900	945
TraesCS6A02G129100	946
TraesCS2D02G086600	947
TraesCS6A02G034900	948
TraesCS2A02G168600	949
TraesCS6D02G344400	950
TraesCS7D02G319100	951
TraesCS6D02G293800	952
TraesCS5D02G139300	953
TraesCS2A02G455800	954
TraesCS3A02G156300	955
TraesCS2D02G239700	956
TraesCS7D02G309300	957
TraesCS2A02G075800	958
TraesCS3D02G427500	959
TraesCS5D02G388800	960
TraesCS6D02G040700	961
TraesCS7D02G454200	962
TraesCS2B02G277000	963
TraesCS7B02G136000	964
TraesCS3A02G277700	965
TraesCS5D02G292200	966
TraesCS3B02G209200	967
TraesCS2A02G501300	968
TraesCS7B02G153100	969
TraesCS6B02G084100	970
TraesCS7D02G372700	971
TraesCS1A02G151700	972
TraesCS3A02G226800	973
TraesCS3A02G330400	974
TraesCS7B02G149400	975
TraesCS4B02G062800	976
TraesCS7B02G183200	977
TraesCS4B02G334100	978
TraesCS5D02G321000	979
TraesCS4D02G224900	980
TraesCS6A02G074200	981
TraesCS5A02G152600	982
TraesCS4D02G256100	983
TraesCS2B02G184900	984
TraesCS6D02G166900	985
TraesCS3B02G270400	986
TraesCS4B02G186200	987
TraesCS5B02G448200	988
TraesCS6D02G135000	989
TraesCS4B02G200800	990
TraesCS3D02G435000	991
TraesCS5D02G415700	992
TraesCS6B02G412400	993
TraesCS5A02G385300	994
TraesCS3B02G441600	995
TraesCS4B02G198100	996
TraesCS5B02G366100	997
TraesCS7D02G513700	998
TraesCS1D02G398600	999
TraesCS7D02G357500	1000
TraesCS7D02G471300	1001
TraesCS4A02G100400	1002
TraesCS3D02G359700	1003
TraesCS5A02G143200	1004
TraesCS2D02G487200	1005
TraesCS1B02G024500	1006
TraesCS2D02G281300	1007
TraesCS6B02G300500	1008
TraesCS5B02G142100	1009
TraesCS5A02G471700	1010
TraesCS4B02G315600	1011
TraesCS6B02G081600	1012
TraesCS7D02G160900	1013
TraesCS4B02G049600	1014
TraesCS1B02G128100	1015
TraesCS3D02G306900	1016
TraesCS2D02G296200	1017
TraesCS3D02G099000	1018
TraesCS5D02G435600	1019
TraesCS4B02G116300	1020
TraesCS5B02G413800	1021
TraesCS6A02G206500	1022
TraesCS1B02G260200	1023
TraesCS7A02G410000	1024
TraesCS1D02G188500	1025
TraesCS7B02G191600	1026
TraesCS1B02G308300	1027
TraesCS3D02G216200	1028
TraesCS5A02G020900	1029
TraesCS3A02G344300	1030
TraesCS2A02G397700	1031
TraesCS7B02G309400	1032
TraesCS2D02G132500	1033
TraesCS7D02G512900	1034
TraesCS7A02G377700	1035
TraesCS2D02G401900	1036
TraesCS3B02G145100	1037
TraesCS4D02G350700	1038
TraesCS1D02G084500	1039
TraesCS7B02G134400	1040
TraesCS3B02G093400	1041
TraesCS4B02G303100	1042
TraesCS7B02G143600	1043
TraesCS4A02G421900	1044
TraesCS3B02G126400	1045
TraesCS1D02G285800	1046
TraesCS3D02G442000	1047
TraesCS4A02G357200	1048
TraesCS3D02G333800	1049
TraesCS4A02G078100	1050
TraesCS5D02G210200	1051
TraesCS3A02G108000	1052
TraesCS7B02G260700	1053
TraesCS6D02G277900	1054
TraesCS5D02G474800	1055
TraesCS5A02G254600	1056
TraesCS3A02G155200	1057
TraesCS6B02G344300	1058
TraesCS7B02G069800	1059
TraesCS6A02G299000	1060
TraesCS3A02G314100	1061
TraesCS7D02G447200	1062
TraesCS7B02G394500	1063
TraesCS5D02G418900	1064
TraesCS5A02G027100	1065
TraesCS6B02G246500	1066
TraesCS2D02G168000	1067
TraesCS3D02G169500	1068
TraesCS1A02G214600	1069
TraesCS2B02G250700	1070
TraesCS6A02G173100	1071
TraesCS3A02G187000	1072
TraesCS7A02G341600	1073
TraesCS5A02G073600	1074
TraesCS4A02G096700	1075
TraesCS3A02G401400	1076
TraesCS1A02G427600	1077
TraesCS3A02G347700	1078
TraesCS7D02G513300	1079
TraesCS3D02G124400	1080
TraesCS2B02G198800	1081
TraesCS7D02G391700	1082
TraesCS6D02G201700	1083
TraesCS7A02G463700	1084
TraesCS4A02G199900	1085
TraesCS3B02G347300	1086
TraesCS6A02G063100	1087
TraesCS7A02G245900	1088
TraesCS3A02G272200	1089
TraesCS1B02G162000	1090
TraesCS3B02G410300	1091
TraesCS7B02G373000	1092
TraesCS6D02G040500	1093
TraesCS3A02G131900	1094
TraesCS5B02G171200	1095
TraesCS3D02G532300	1096
TraesCS2A02G152000	1097
TraesCS6A02G184100	1098
TraesCS6B02G258200	1099
TraesCS2D02G096000	1100
TraesCS7B02G226800	1101
TraesCS5D02G134400	1102
TraesCS2A02G586500	1103
TraesCS7B02G115300	1104
TraesCS1B02G093600	1105
TraesCS5B02G226100	1106
TraesCS2A02G426900	1107
TraesCS2D02G488700	1108
TraesCS3D02G139300	1109
TraesCS6B02G331400	1110
TraesCS1A02G370000	1111
TraesCS2A02G069600	1112
TraesCS3B02G324400	1113
TraesCS3A02G405600	1114
TraesCS4D02G155800	1115
TraesCS3A02G183500	1116
TraesCS3D02G193600	1117
TraesCS7B02G393500	1118
TraesCS7D02G085800	1119
TraesCS2A02G142800	1120
TraesCS4A02G174700	1121
TraesCS1D02G228900	1122
TraesCS5D02G366400	1123
TraesCS2A02G160700	1124
TraesCS6D02G184300	1125
TraesCS5A02G016200	1126
TraesCS7A02G306200	1127
TraesCS6B02G048500	1128
TraesCS4D02G287300	1129
TraesCS4B02G339700	1130
TraesCS7D02G408000	1131
TraesCS3D02G167100	1132
TraesCS2B02G604700	1133
TraesCS3B02G283700	1134
TraesCS3A02G204700	1135
TraesCS1D02G313900	1136
TraesCS2A02G305800	1137
TraesCS3D02G041500	1138
TraesCS6B02G193100	1139
TraesCS2D02G332500	1140
TraesCS6A02G086400	1141
TraesCS3B02G419900	1142
TraesCS2B02G415900	1143
TraesCS3B02G125600	1144
TraesCS2D02G303600	1145
TraesCS4B02G204100	1146
TraesCS6A02G264600	1147
TraesCS4B02G197800	1148
TraesCS7D02G342100	1149
TraesCS5B02G179900	1150
TraesCS5B02G449000	1151
TraesCS5B02G023100	1152
TraesCS5B02G358600	1153
TraesCS4D02G295300	1154
TraesCS6D02G123700	1155
TraesCS6D02G172400	1156
TraesCS2B02G367700	1157
TraesCS3D02G119600	1158
TraesCS4D02G034200	1159
TraesCS2D02G348200	1160
TraesCS7D02G441800	1161
TraesCS7D02G230100	1162
TraesCS5B02G478900	1163
TraesCS3A02G409200	1164
TraesCS4D02G205400	1165
TraesCS4B02G255400	1166
TraesCS5D02G209700	1167
TraesCS7D02G156900	1168
TraesCS6D02G158400	1169
TraesCS7A02G292100	1170
TraesCS3A02G490500	1171
TraesCS3B02G148900	1172
TraesCS7A02G185500	1173
TraesCS3B02G387800	1174
TraesCS3A02G239700	1175
TraesCS7D02G439900	1176
TraesCS1B02G255700	1177
TraesCS4B02G344600	1178
TraesCS2B02G582800	1179
TraesCS2B02G172100	1180
TraesCS7B02G288100	1181
TraesCS5A02G384200	1182
TraesCS5A02G165400	1183
TraesCS2B02G306600	1184
TraesCS3D02G118300	1185
TraesCS6B02G253000	1186
TraesCS7D02G252200	1187
TraesCS5A02G212000	1188
TraesCS4D02G349200	1189
TraesCS4B02G142700	1190
TraesCS2A02G306400	1191
TraesCS2A02G344800	1192
TraesCS3A02G285500	1193
TraesCS2A02G347800	1194
TraesCS3B02G210300	1195
TraesCS1B02G123100	1196
TraesCS4D02G122200	1197
TraesCS1B02G223300	1198
TraesCS4B02G169600	1199
TraesCS5D02G504600	1200
TraesCS7D02G129800	1201
TraesCS4D02G255100	1202
TraesCS3B02G390500	1203
TraesCS2D02G477100	1204
TraesCS3A02G408700	1205
TraesCS7A02G009900	1206
TraesCS5B02G270500	1207
TraesCS3A02G278700	1208
TraesCS5D02G397200	1209
TraesCS5D02G228600	1210
TraesCS7D02G253100	1211
TraesCS1B02G326200	1212
TraesCS6D02G249700	1213
TraesCS6D02G209600	1214
TraesCS6D02G339500	1215
TraesCS3A02G161300	1216
TraesCS4B02G015800	1217
TraesCS7D02G308600	1218
TraesCS1B02G276500	1219
TraesCS7A02G329100	1220
TraesCS7B02G078300	1221
TraesCS1A02G363000	1222
TraesCS3D02G193700	1223
TraesCS1B02G281000	1224
TraesCS5A02G086300	1225
TraesCS4B02G339200	1226
TraesCS7A02G321000	1227
TraesCS7A02G108900	1228
TraesCS1A02G298800	1229
TraesCS4D02G312500	1230
TraesCS2B02G602800	1231
TraesCS3D02G380800	1232
TraesCS1D02G293600	1233
TraesCS3A02G417900	1234
TraesCS1D02G266900	1235
TraesCS6B02G276900	1236
TraesCS2B02G410100	1237
TraesCS3B02G128100	1238
TraesCS6B02G352000	1239
TraesCS3D02G186900	1240
TraesCS6B02G366700	1241
TraesCS6B02G104300	1242
TraesCS6D02G054100	1243
TraesCS7D02G014900	1244
TraesCS5A02G337000	1245
TraesCS7D02G318000	1246
TraesCS7B02G147700	1247
TraesCS6B02G089500	1248
TraesCS4B02G346900	1249
TraesCS1A02G041000	1250
TraesCS3D02G109600	1251
TraesCS6A02G298300	1252
TraesCS1A02G181900	1253
TraesCS4B02G090700	1254
TraesCS2D02G163700	1255
TraesCS7D02G509200	1256
TraesCS6D02G211400	1257
TraesCS7A02G455300	1258
TraesCS4D02G222700	1259
TraesCS6D02G195400	1260
TraesCS5B02G023000	1261
TraesCS3A02G248000	1262
TraesCS2D02G094800	1263
TraesCS7D02G258000	1264
TraesCS2A02G328700	1265
TraesCS2D02G169300	1266
TraesCS7B02G170700	1267
TraesCS5B02G134600	1268
TraesCS3D02G371900	1269
TraesCS3A02G185400	1270
TraesCS5B02G162800	1271
TraesCS2D02G383100	1272
TraesCS7A02G443100	1273
TraesCS2B02G233100	1274
TraesCS5A02G081900	1275
TraesCS5A02G221900	1276
TraesCS2B02G561000	1277
TraesCS7B02G484200	1278
TraesCS7D02G444200	1279
TraesCS3A02G060500	1280
TraesCS3A02G131500	1281
TraesCS3B02G190600	1282
TraesCS4A02G367000	1283
TraesCS1B02G282600	1284
TraesCS4B02G251800	1285
TraesCS4A02G102400	1286
TraesCS7D02G247100	1287
TraesCS2D02G057800	1288
TraesCS2A02G095200	1289
TraesCS2D02G115700	1290
TraesCS3A02G284900	1291
TraesCS5A02G405700	1292
TraesCS2B02G475000	1293
TraesCS6A02G277000	1294
TraesCS7A02G488600	1295
TraesCS1B02G133200	1296
TraesCS5B02G277200	1297
TraesCS7D02G215000	1298
TraesCS3D02G320600	1299
TraesCS3B02G408500	1300
TraesCS4D02G177000	1301
TraesCS2A02G388400	1302
TraesCS1D02G148900	1303
TraesCS4A02G068100	1304
TraesCS2A02G412200	1305
TraesCS1D02G364400	1306
TraesCS2A02G261000	1307
TraesCS6B02G207000	1308
TraesCS1D02G034200	1309
TraesCS3D02G260100	1310
TraesCS7B02G223100	1311
TraesCS5A02G091400	1312
TraesCS4B02G135200	1313
TraesCS1B02G209200	1314
TraesCS3B02G133000	1315
TraesCSU02G000700	1316
TraesCS2B02G412300	1317
TraesCS1B02G285600	1318
TraesCS7B02G464800	1319
TraesCS4D02G348600	1320
TraesCS6A02G138100	1321
TraesCS4B02G226500	1322
TraesCS7B02G056700	1323
TraesCS5B02G359800	1324
TraesCS1B02G087200	1325
TraesCS2A02G256400	1326
TraesCS4D02G025700	1327
TraesCS1D02G366800	1328
TraesCS3D02G168500	1329
TraesCS3D02G301200	1330
TraesCS6A02G217500	1331
TraesCS4D02G189800	1332
TraesCS3D02G312600	1333
TraesCS3A02G340300	1334
TraesCS2B02G166800	1335
TraesCS4A02G199700	1336
TraesCS2A02G270200	1337
TraesCS2A02G130200	1338
TraesCS2A02G332800	1339
TraesCS5A02G390200	1340
TraesCS1D02G370800	1341
TraesCS1B02G194600	1342
TraesCS4B02G277700	1343
TraesCSU02G018300	1344
TraesCS4A02G184100	1345
TraesCS4B02G172500	1346
TraesCS1D02G352000	1347
TraesCS7A02G491100	1348
TraesCS7D02G528600	1349
TraesCS5D02G208900	1350
TraesCS4B02G213600	1351
TraesCS4B02G207500	1352
TraesCS3D02G223900	1353
TraesCS4A02G032800	1354
TraesCS4D02G135500	1355
TraesCS3B02G087400	1356
TraesCS5B02G264300	1357
TraesCS7A02G330300	1358
TraesCS2D02G281000	1359
TraesCS7A02G253600	1360
TraesCS6B02G359000	1361
TraesCS5D02G424100	1362
TraesCS1D02G437100	1363
TraesCS1A02G100600	1364
TraesCS1A02G255400	1365
TraesCS1A02G203400	1366
TraesCS7D02G355000	1367
TraesCS1B02G125800	1368
TraesCS7A02G235200	1369
TraesCS2B02G483200	1370
TraesCS2D02G561400	1371
TraesCS6B02G387300	1372
TraesCS2B02G550600	1373
TraesCS7D02G358200	1374
TraesCS1D02G236200	1375
TraesCS4A02G127500	1376
TraesCS4A02G240000	1377
TraesCS6D02G204200	1378
TraesCS6B02G413500	1379
TraesCS2B02G172200	1380
TraesCS7A02G461600	1381
TraesCS6D02G197800	1382
TraesCS2A02G238000	1383
TraesCS7D02G275900	1384
TraesCS7A02G161100	1385
TraesCS1A02G193800	1386
TraesCS7D02G426000	1387
TraesCS7D02G329300	1388
TraesCS2A02G535600	1389
TraesCS5A02G202400	1390
TraesCS3B02G311300	1391
TraesCS5D02G405900	1392
TraesCS6B02G425900	1393
TraesCS7D02G019700	1394
TraesCS7B02G021700	1395
TraesCS1B02G284200	1396
TraesCS2B02G329300	1397
TraesCS3A02G246900	1398
TraesCS2A02G282200	1399
TraesCS7D02G392500	1400
TraesCS3A02G343600	1401
TraesCS2D02G182500	1402
TraesCS2D02G038900	1403
TraesCS3D02G475300	1404
TraesCS3D02G483200	1405
TraesCS3B02G506600	1406
TraesCSU02G075700	1407
TraesCS7A02G250400	1408
TraesCS3B02G439400	1409
TraesCS1A02G330100	1410
TraesCS3A02G473600	1411
TraesCS7B02G117300	1412
TraesCS3D02G276200	1413
TraesCS5D02G200000	1414
TraesCS1A02G231100	1415
TraesCS7A02G434400	1416
TraesCS4D02G225500	1417
TraesCS2B02G094800	1418
TraesCS1A02G291700	1419
TraesCS6D02G243000	1420
TraesCS7D02G492200	1421
TraesCS3A02G419700	1422
TraesCS7B02G260600	1423
TraesCS4D02G266400	1424
TraesCS3A02G534100	1425
TraesCS3A02G106700	1426
TraesCS2A02G294500	1427
TraesCS2A02G109800	1428
TraesCS5D02G099800	1429
TraesCS4B02G325900	1430
TraesCS1A02G330900	1431
TraesCS2D02G362500	1432
TraesCS1B02G254000	1433
TraesCS4B02G352700	1434
TraesCS4A02G202000	1435
TraesCS5D02G508200	1436
TraesCS3A02G111100	1437
TraesCS5A02G027000	1438
TraesCS5D02G133900	1439
TraesCS2A02G423500	1440
TraesCS2A02G247300	1441
TraesCS5A02G234300	1442
TraesCS2B02G363400	1443
TraesCS2A02G410000	1444
TraesCS7A02G424500	1445
TraesCS6D02G266300	1446
TraesCS1D02G288700	1447
TraesCS4B02G232400	1448
TraesCS6D02G147300	1449
TraesCS4B02G164800	1450
TraesCS2B02G422500	1451
TraesCS1B02G115300	1452
TraesCS6A02G337700	1453
TraesCS5D02G106700	1454
TraesCS5D02G262400	1455
TraesCS1D02G106700	1456
TraesCS2A02G286700	1457
TraesCS1B02G345800	1458
TraesCS5A02G409100	1459
TraesCS1A02G266600	1460
TraesCS4D02G304700	1461
TraesCS5A02G349300	1462
TraesCS6A02G321600	1463
TraesCS2A02G221000	1464
TraesCS5D02G284800	1465
TraesCS7D02G387800	1466
TraesCS3A02G288200	1467
TraesCS6D02G352200	1468
TraesCS7D02G032700	1469
TraesCS5A02G548600	1470
TraesCS3D02G289500	1471
TraesCS3A02G480900	1472
TraesCS7A02G520300	1473
TraesCS2A02G309500	1474
TraesCS5B02G324300	1475
TraesCS3B02G414800	1476
TraesCS2D02G540000	1477
TraesCS2A02G416900	1478
TraesCS5A02G475600	1479
TraesCS4D02G335600	1480
TraesCS3A02G130100	1481
TraesCS3A02G423200	1482
TraesCS7D02G004600	1483
TraesCS2B02G396600	1484
TraesCS3D02G448100	1485
TraesCS1B02G166600	1486
TraesCS6B02G326000	1487
TraesCS2D02G436100	1488
TraesCS2A02G357500	1489
TraesCS1D02G233300	1490
TraesCS7B02G453400	1491
TraesCS3D02G093200	1492
TraesCS3D02G091300	1493
TraesCS4B02G177100	1494
TraesCS3D02G077500	1495
TraesCS5D02G405300	1496
TraesCS2D02G117900	1497
TraesCS1A02G117500	1498
TraesCS2A02G211100	1499
TraesCS6A02G058200	1500
TraesCS4B02G027100	1501
TraesCS1D02G268600	1502
TraesCS2A02G545100	1503
TraesCS2B02G236700	1504
TraesCS3A02G157900	1505
TraesCS1D02G191000	1506
TraesCS3B02G454900	1507
TraesCS2B02G413400	1508
TraesCS4D02G342400	1509
TraesCS7D02G149300	1510
TraesCS3A02G176500	1511
TraesCS5B02G269600	1512
TraesCS7B02G378900	1513
TraesCS6A02G358700	1514
TraesCS4D02G309000	1515
TraesCS3D02G418400	1516
TraesCS7D02G253800	1517
TraesCS1A02G358600	1518
TraesCS1D02G346200	1519
TraesCS6D02G066100	1520
TraesCS7A02G424800	1521
TraesCS1B02G322800	1522
TraesCS3D02G346500	1523
TraesCS6A02G133700	1524
TraesCS1D02G185000	1525
TraesCS1B02G090400	1526
TraesCS1B02G312500	1527
TraesCS5D02G081000	1528
TraesCS3A02G301600	1529
TraesCS1B02G440600	1530
TraesCS4A02G092200	1531
TraesCS2B02G264100	1532
TraesCS7A02G102600	1533
TraesCS4D02G201800	1534
TraesCS7A02G376500	1535
TraesCS3D02G382600	1536
TraesCS3A02G109500	1537
TraesCS4D02G313900	1538
TraesCS1A02G228700	1539
TraesCS2D02G246800	1540
TraesCS3B02G337800	1541
TraesCS5D02G293800	1542
TraesCS3A02G158400	1543
TraesCS3D02G335100	1544
TraesCS1A02G141900	1545
TraesCS6D02G318600	1546
TraesCS3A02G378700	1547
TraesCS7B02G242200	1548
TraesCS3D02G484900	1549
TraesCS4B02G102700	1550
TraesCS2A02G407500	1551
TraesCS1A02G410500	1552
TraesCS2B02G122900	1553
TraesCS6B02G048700	1554
TraesCS1D02G219700	1555
TraesCS4B02G135500	1556
TraesCS5D02G467300	1557
TraesCS5B02G185400	1558
TraesCS3A02G191400	1559
TraesCS3B02G424100	1560
TraesCS2D02G235400	1561
TraesCS2D02G112300	1562
TraesCS2D02G371300	1563
TraesCS6D02G321100	1564
TraesCS2A02G202100	1565
TraesCS2B02G201700	1566
TraesCS5A02G150700	1567
TraesCS3D02G403800	1568
TraesCS1B02G274900	1569
TraesCS1B02G270800	1570
TraesCS2B02G376700	1571
TraesCS2A02G396500	1572
TraesCS7A02G010300	1573
TraesCS5D02G192300	1574
TraesCS4A02G225500	1575
TraesCS5D02G252700	1576
TraesCS5B02G440700	1577
TraesCS4A02G002700	1578
TraesCS5D02G569700	1579
TraesCS6A02G058700	1580
TraesCS4A02G097200	1581
TraesCS5A02G518800	1582
TraesCS6A02G107800	1583
TraesCS3B02G565600	1584
TraesCS3D02G180000	1585
TraesCS6B02G205500	1586
TraesCS1D02G075700	1587
TraesCS5D02G530200	1588
TraesCS2A02G106500	1589
TraesCS5A02G280700	1590
TraesCS4B02G184900	1591
TraesCS5D02G466800	1592
TraesCS6B02G159600	1593
TraesCS5A02G461000	1594
TraesCS6A02G333800	1595
TraesCS4D02G087800	1596
TraesCS7B02G476800	1597
TraesCS1D02G287500	1598
TraesCS3D02G140300	1599
TraesCS2B02G232900	1600
TraesCS7A02G376700	1601
TraesCS1A02G341300	1602
TraesCS7A02G008900	1603
TraesCS5D02G359600	1604
TraesCS1B02G245400	1605
TraesCS7B02G106100	1606
TraesCS2A02G209500	1607
TraesCS5A02G402500	1608
TraesCS5B02G271800	1609
TraesCS2B02G194600	1610
TraesCS2A02G249900	1611
TraesCS1A02G358400	1612
TraesCS7D02G339300	1613
TraesCS1D02G365400	1614
TraesCS5D02G275300	1615
TraesCS2B02G414700	1616
TraesCS1D02G087300	1617
TraesCS4D02G120500	1618
TraesCS6D02G186800	1619
TraesCS5D02G244700	1620
TraesCS2B02G322800	1621
TraesCS2A02G532700	1622
TraesCS3D02G336300	1623
TraesCS1D02G272200	1624
TraesCS3A02G408000	1625
TraesCS5A02G532600	1626
TraesCS7D02G001600	1627
TraesCS6A02G275100	1628
TraesCS7B02G258500	1629
TraesCS7B02G393700	1630
TraesCS5D02G160300	1631
TraesCS1D02G372000	1632
TraesCS4A02G040000	1633
TraesCS3B02G162300	1634
TraesCS4A02G015700	1635
TraesCS4A02G039000	1636
TraesCS2D02G534500	1637
TraesCS3D02G248300	1638
TraesCS2A02G190200	1639
TraesCS5A02G118500	1640
TraesCS7A02G132800	1641
TraesCS5A02G058500	1642
TraesCS5D02G096500	1643
TraesCS7D02G259900	1644
TraesCS5B02G402800	1645
TraesCS4B02G171100	1646
TraesCS6D02G302700	1647
TraesCS6B02G343200	1648
TraesCS1B02G263300	1649
TraesCS4D02G214100	1650
TraesCS3A02G424700	1651
TraesCS2D02G082000	1652
TraesCS7D02G322800	1653
TraesCS2D02G421200	1654
TraesCS4D02G053000	1655
TraesCS1A02G380300	1656
TraesCS4D02G235400	1657
TraesCS2B02G401700	1658
TraesCS5B02G219700	1659
TraesCS7B02G130000	1660
TraesCS5A02G440800	1661
TraesCS1B02G384100	1662
TraesCS6D02G040800	1663
TraesCS6A02G179800	1664
TraesCS5A02G185000	1665
TraesCS2D02G194400	1666
TraesCS4A02G294400	1667
TraesCS2B02G105100	1668
TraesCS2A02G054200	1669
TraesCS1B02G404000	1670
TraesCS3A02G044800	1671
TraesCSU02G056700	1672
TraesCS1B02G378500	1673
TraesCS5B02G560500	1674
TraesCS3A02G516300	1675
TraesCS3A02G274100	1676
TraesCS3B02G089900	1677
TraesCS5A02G246200	1678
TraesCS3B02G468900	1679
TraesCS2D02G050300	1680
TraesCS4A02G167000	1681
TraesCS5B02G521500	1682
TraesCS4A02G091300	1683
TraesCS7D02G477400	1684
TraesCS6A02G015700	1685
TraesCS3D02G281400	1686
TraesCS5B02G285400	1687
TraesCS4A02G121500	1688
TraesCS4B02G215000	1689
TraesCS4D02G208100	1690
TraesCS5B02G401300	1691
TraesCS5A02G144600	1692
TraesCS3A02G488700	1693
TraesCS3A02G419800	1694
TraesCS7B02G350200	1695
TraesCS6B02G349300	1696
TraesCS2A02G024800	1697
TraesCS2D02G403000	1698
TraesCS3B02G391800	1699
TraesCS7B02G166000	1700
TraesCS5B02G068600	1701
TraesCS6B02G332500	1702
TraesCS5B02G214400	1703
TraesCS2A02G583800	1704
TraesCS3A02G402500	1705
TraesCS6B02G049000	1706
TraesCS7A02G251500	1707
TraesCS2B02G183100	1708
TraesCS2D02G346800	1709
TraesCS3A02G131000	1710
TraesCS2A02G438200	1711
TraesCS3B02G029500	1712
TraesCS3B02G135500	1713
TraesCS6B02G266600	1714
TraesCS6B02G197500	1715
TraesCS3B02G017100	1716
TraesCS2A02G555300	1717
TraesCS1D02G398100	1718
TraesCS2B02G227100	1719
TraesCS3B02G242400	1720
TraesCS7D02G089500	1721
TraesCS1B02G430500	1722
TraesCS3B02G398400	1723
TraesCS1B02G353700	1724
TraesCS3D02G182600	1725
TraesCS5A02G267500	1726
TraesCS1A02G390400	1727
TraesCS5A02G103100	1728
TraesCS2D02G376300	1729
TraesCS1D02G418500	1730
TraesCS3B02G037400	1731
TraesCS1A02G182600	1732
TraesCS6A02G218900	1733
TraesCS3B02G354400	1734
TraesCS4D02G233700	1735
TraesCS2B02G561100	1736
TraesCS7B02G221800	1737
TraesCS4A02G049500	1738
TraesCS2D02G455200	1739
TraesCSU02G272400	1740
TraesCS5A02G029800	1741
TraesCS1A02G273500	1742
TraesCS6D02G162200	1743
TraesCS3B02G003100	1744
TraesCS4A02G368800	1745
TraesCS3D02G317900	1746
TraesCS6A02G057900	1747
TraesCS2B02G175300	1748
TraesCS3D02G130700	1749
TraesCS2D02G502700	1750
TraesCS4D02G158800	1751
TraesCS1D02G177800	1752
TraesCS4B02G194000	1753
TraesCS4A02G407300	1754
TraesCS2A02G136700	1755
TraesCS1B02G236500	1756
TraesCS4A02G072100	1757
TraesCS4B02G301700	1758
TraesCS2A02G532300	1759
TraesCS2D02G304900	1760
TraesCS5D02G400900	1761
TraesCS7B02G351000	1762
TraesCS4D02G000500	1763
TraesCS7B02G243500	1764
TraesCS3A02G356800	1765
TraesCS6D02G017100	1766
TraesCS4A02G132300	1767
TraesCS2B02G484300	1768
TraesCSU02G123300	1769
TraesCS1A02G209100	1770
TraesCS3B02G423300	1771
TraesCS3D02G351700	1772
TraesCS5A02G330600	1773
TraesCS1D02G368000	1774
TraesCS6D02G106100	1775
TraesCS2A02G199800	1776
TraesCS4D02G033300	1777
TraesCS6A02G216100	1778
TraesCS4A02G092400	1779
TraesCS2D02G280600	1780
TraesCS2D02G377100	1781
TraesCS3D02G323000	1782
TraesCS4D02G304500	1783
TraesCS4A02G074800	1784
TraesCS6A02G273700	1785
TraesCS1D02G308600	1786
TraesCS2D02G238000	1787
TraesCS2D02G295600	1788
TraesCS5D02G557200	1789
TraesCS4D02G041000	1790
TraesCS5A02G314700	1791
TraesCS4A02G342800	1792
TraesCS5B02G058400	1793
TraesCS6B02G049300	1794
TraesCS6B02G112800	1795
TraesCS2B02G372900	1796
TraesCS2B02G128300	1797
TraesCS5D02G153500	1798
TraesCS4B02G287600	1799
TraesCS6B02G073600	1800
TraesCS3A02G244500	1801
TraesCS6B02G055300	1802
TraesCS1A02G153100	1803
TraesCS2A02G482200	1804
TraesCS3D02G023800	1805
TraesCS5B02G547800	1806
TraesCS3A02G076200	1807
TraesCS3B02G318800	1808
TraesCSU02G096500	1809
TraesCS3B02G232000	1810
TraesCS6B02G398200	1811
TraesCS1D02G156800	1812
TraesCS1A02G268500	1813
TraesCS7B02G471600	1814
TraesCS2B02G423700	1815
TraesCS7D02G415200	1816
TraesCS2B02G267500	1817
TraesCS2A02G248600	1818
TraesCS4B02G296000	1819
TraesCS2A02G395400	1820
TraesCS2A02G433000	1821
TraesCS2D02G032500	1822
TraesCS4B02G347400	1823
TraesCS4D02G172600	1824
TraesCS2D02G381000	1825
TraesCS1B02G159800	1826
TraesCS5B02G557300	1827
TraesCS1B02G299300	1828
TraesCS2B02G455800	1829
TraesCS4B02G050200	1830
TraesCS5B02G315600	1831
TraesCS1A02G360100	1832
TraesCS1D02G117900	1833
TraesCS5B02G503800	1834
TraesCS1A02G270700	1835
TraesCS1D02G104400	1836
TraesCS5A02G416400	1837
TraesCS5B02G418400	1838
TraesCS7B02G118900	1839
TraesCS5B02G379300	1840
TraesCS3B02G317300	1841
TraesCS3B02G192300	1842
TraesCS4B02G136300	1843
TraesCS5D02G416900	1844
TraesCS5D02G229700	1845
TraesCS4A02G157900	1846
TraesCS2D02G204200	1847
TraesCS6D02G330800	1848
TraesCS3A02G334400	1849
TraesCS3B02G509400	1850
TraesCS5A02G504600	1851
TraesCS3A02G268600	1852
TraesCS3B02G407500	1853
TraesCS7A02G068500	1854
TraesCS2D02G292200	1855
TraesCS6A02G177500	1856
TraesCSU02G053700	1857
TraesCS4B02G197500	1858
TraesCS1D02G013000	1859
TraesCS6A02G121300	1860
TraesCS7B02G288000	1861
TraesCS4B02G023700	1862
TraesCS3A02G204000	1863
TraesCS7D02G268300	1864
TraesCS5D02G414600	1865
TraesCS1A02G152100	1866
TraesCS7A02G314300	1867
TraesCS3D02G447600	1868
TraesCS7D02G168400	1869
TraesCS1D02G206700	1870
TraesCS4B02G134600	1871
TraesCS1A02G218500	1872
TraesCS4B02G364400	1873
TraesCS3A02G139900	1874
TraesCS4D02G322000	1875
TraesCS2D02G368400	1876
TraesCS6D02G278400	1877
TraesCS1D02G418400	1878
TraesCS3A02G368800	1879
TraesCS6B02G161300	1880
TraesCS3A02G180200	1881
TraesCS7A02G417900	1882
TraesCS2D02G145100	1883
TraesCS2B02G289800	1884
TraesCS1B02G042300	1885
TraesCS1D02G353800	1886
TraesCS7A02G251600	1887
TraesCS5B02G489100	1888
TraesCS3D02G370000	1889
TraesCS1D02G034700	1890
TraesCS4D02G045200	1891
TraesCS5D02G221900	1892
TraesCS5A02G375200	1893
TraesCS1A02G110000	1894
TraesCS5A02G131600	1895
TraesCS1B02G322100	1896
TraesCS3D02G467600	1897
TraesCS5A02G232700	1898
TraesCS5D02G272800	1899
TraesCS7D02G390400	1900
TraesCS5B02G177200	1901
TraesCS3B02G558400	1902
TraesCS3D02G103800	1903
TraesCS5A02G174600	1904
TraesCS3D02G361800	1905
TraesCS3B02G409400	1906
TraesCS5A02G185600	1907
TraesCS1D02G292600	1908
TraesCS6B02G049100	1909
TraesCS2B02G366300	1910
TraesCS2D02G500600	1911
TraesCS2B02G226000	1912
TraesCS5B02G075300	1913
TraesCS2A02G372500	1914
TraesCS3B02G277000	1915
TraesCS4D02G246000	1916
TraesCS4B02G115700	1917
TraesCS3B02G123200	1918
TraesCS7B02G327700	1919
TraesCS1D02G268500	1920
TraesCS5D02G071300	1921
TraesCS7A02G421100	1922
TraesCS1D02G218000	1923
TraesCS7D02G092800	1924
TraesCS3A02G435700	1925
TraesCS6D02G090400	1926
TraesCS2A02G096400	1927
TraesCSU02G005000	1928
TraesCS5B02G465000	1929
TraesCS5D02G242400	1930
TraesCS2B02G474600	1931
TraesCS6D02G302900	1932
TraesCS4B02G282900	1933
TraesCS7A02G406700	1934
TraesCS5D02G515700	1935
TraesCS5D02G507500	1936
TraesCS7B02G486800	1937
TraesCS2D02G163900	1938
TraesCS4B02G268200	1939
TraesCS6A02G297800	1940
TraesCS7A02G248300	1941
TraesCS5A02G063400	1942
TraesCS7B02G411900	1943
TraesCS2A02G389100	1944
TraesCS2B02G435600	1945
TraesCS3B02G192400	1946
TraesCS3D02G106800	1947
TraesCS7B02G214700	1948
TraesCS7A02G193200	1949
TraesCS1D02G065300	1950
TraesCS2B02G387000	1951
TraesCS1B02G396200	1952
TraesCS6D02G197700	1953
TraesCS6A02G243300	1954
TraesCS5D02G445100	1955
TraesCS7D02G353100	1956
TraesCS5D02G335700	1957
TraesCS2D02G592500	1958
TraesCS5D02G334300	1959
TraesCS6A02G319100	1960
TraesCS1B02G225300	1961
TraesCS4B02G207200	1962
TraesCS7B02G394100	1963
TraesCS2D02G323100	1964
TraesCS7B02G024500	1965
TraesCS4A02G129400	1966
TraesCS2A02G378300	1967
TraesCS6D02G095800	1968
TraesCS4D02G221600	1969
TraesCS6D02G277200	1970
TraesCS5B02G375200	1971
TraesCS5D02G495900	1972
TraesCS6B02G294500	1973
TraesCS5B02G125400	1974
TraesCS4B02G288300	1975
TraesCS4D02G269900	1976
TraesCS6A02G384300	1977
TraesCS5B02G409900	1978
TraesCS1D02G281800	1979
TraesCS3A02G046100	1980
TraesCS4D02G291500	1981
TraesCS2D02G540600	1982
TraesCS4B02G235500	1983
TraesCS3A02G466200	1984
TraesCS4A02G194800	1985
TraesCS2A02G029800	1986
TraesCS1D02G216700	1987
TraesCS6D02G041600	1988
TraesCS6A02G353800	1989
TraesCS3B02G391600	1990
TraesCS5D02G411300	1991
TraesCS2A02G452100	1992
TraesCS5B02G230800	1993
TraesCS1D02G289800	1994
TraesCS3D02G302900	1995
TraesCS4B02G285600	1996
TraesCS1A02G051500	1997
TraesCS1B02G135300	1998
[truncated: 51,385 more rows]

## Sheet: Table S15
Table S15. Regulatory relationships between RNA clusters.
RNA.cluster1	RNA.cluster2	Pvalue
C1	C1	0
C1	C2	1
C1	C3	1
C1	C4	1
C1	C5	1
C1	C6	1
C2	C1	1
C2	C2	0
C2	C3	4.88228e-278
C2	C4	0
C2	C5	1
C2	C6	1
C3	C1	1
C3	C2	0
C3	C3	0
C3	C4	0
C3	C5	1
C3	C6	1
C4	C1	1
C4	C2	4.65386e-139
C4	C3	0
C4	C4	0
C4	C5	1
C4	C6	1
C5	C1	1
C5	C2	1
C5	C3	1
C5	C4	1
C5	C5	0
C5	C6	0
C6	C1	1
C6	C2	0
C6	C3	5.47934e-267
C6	C4	1.36555e-260
C6	C5	0
C6	C6	0

## Sheet: Table S16
Table S16. A network of transcription factors in regulatory mode type I.
tf.GeneID	tf.cluster	tf.enrich	target.GeneID	target.cluster	target.enrich	tf.Family	target.Family
TraesCS1A02G190100	C5	C5.enrich	TraesCS2D02G286300	C6	C6.enrich	NAC	ERF
TraesCS1A02G190100	C5	C5.enrich	TraesCS6D02G049300	C6	C6.enrich	NAC	C2H2
TraesCS1A02G190100	C5	C5.enrich	TraesCS4D02G120200	C6	C6.enrich	NAC	ERF
TraesCS1A02G190100	C5	C5.enrich	TraesCS4A02G193100	C6	C6.enrich	NAC	ERF
TraesCS1A02G190100	C5	C5.enrich	TraesCS4B02G122100	C6	C6.enrich	NAC	ERF
TraesCS1A02G190100	C5	C5.enrich	TraesCS5A02G424600	C6	C6.enrich	NAC	ERF
TraesCS1A02G190100	C5	C5.enrich	TraesCS7A02G145800	C6	C6.enrich	NAC	ERF
TraesCS1A02G190100	C5	C5.enrich	TraesCS4D02G267500	C6	C6.enrich	NAC	ERF
TraesCS1A02G263700	C5	C5.enrich	TraesCS2D02G286300	C6	C6.enrich	NAC	ERF
TraesCS1A02G263700	C5	C5.enrich	TraesCS6D02G049300	C6	C6.enrich	NAC	C2H2
TraesCS1A02G263700	C5	C5.enrich	TraesCS4D02G120200	C6	C6.enrich	NAC	ERF
TraesCS1A02G263700	C5	C5.enrich	TraesCS4A02G193100	C6	C6.enrich	NAC	ERF
TraesCS1A02G263700	C5	C5.enrich	TraesCS4B02G122100	C6	C6.enrich	NAC	ERF
TraesCS1A02G263700	C5	C5.enrich	TraesCS5A02G424600	C6	C6.enrich	NAC	ERF
TraesCS1A02G263700	C5	C5.enrich	TraesCS7A02G145800	C6	C6.enrich	NAC	ERF
TraesCS1A02G263700	C5	C5.enrich	TraesCS4D02G267500	C6	C6.enrich	NAC	ERF
TraesCS1A02G272300	C5	C5.enrich	TraesCS1B02G071700	C6	C6.enrich	ERF	C2H2
TraesCS1A02G272300	C5	C5.enrich	TraesCS1D02G055600	C6	C6.enrich	ERF	C2H2
TraesCS1A02G272300	C5	C5.enrich	TraesCS4B02G101400	C6	C6.enrich	ERF	B3
TraesCS1A02G272300	C5	C5.enrich	TraesCS4B02G122100	C6	C6.enrich	ERF	ERF
TraesCS1A02G272300	C5	C5.enrich	TraesCS4D02G120200	C6	C6.enrich	ERF	ERF
TraesCS1A02G272300	C5	C5.enrich	TraesCS4D02G267500	C6	C6.enrich	ERF	ERF
TraesCS1A02G272300	C5	C5.enrich	TraesCS6B02G280800	C6	C6.enrich	ERF	ERF
TraesCS1A02G272300	C5	C5.enrich	TraesCS5A02G424600	C6	C6.enrich	ERF	ERF
TraesCS1A02G272300	C5	C5.enrich	TraesCS6D02G281200	C6	C6.enrich	ERF	ERF
TraesCS1A02G272300	C5	C5.enrich	TraesCS6D02G225700	C6	C6.enrich	ERF	ERF
TraesCS1A02G272300	C5	C5.enrich	TraesCS6A02G243500	C6	C6.enrich	ERF	ERF
TraesCS1A02G272300	C5	C5.enrich	TraesCS7A02G145800	C6	C6.enrich	ERF	ERF
TraesCS1A02G272300	C5	C5.enrich	TraesCS4B02G268100	C6	C6.enrich	ERF	ERF
TraesCS1A02G334100	C5	C5.enrich	TraesCS6B02G280800	C6	C6.enrich	Dof	ERF
TraesCS1A02G334100	C5	C5.enrich	TraesCS6D02G281200	C6	C6.enrich	Dof	ERF
TraesCS1A02G409800	C5	C5.enrich	TraesCS3B02G505100	C6	C6.enrich	bZIP	B3
TraesCS1A02G409800	C5	C5.enrich	TraesCS6D02G225700	C6	C6.enrich	bZIP	ERF
TraesCS1A02G409800	C5	C5.enrich	TraesCS3A02G149000	C6	C6.enrich	bZIP	ERF
TraesCS1A02G409800	C5	C5.enrich	TraesCS3D02G157100	C6	C6.enrich	bZIP	ERF
TraesCS1A02G409800	C5	C5.enrich	TraesCS4A02G193100	C6	C6.enrich	bZIP	ERF
TraesCS1A02G409800	C5	C5.enrich	TraesCS4B02G122100	C6	C6.enrich	bZIP	ERF
TraesCS1B02G055200	C5	C5.enrich	TraesCS4B02G122100	C6	C6.enrich	MYB	ERF
TraesCS1B02G055200	C5	C5.enrich	TraesCS5B02G426600	C6	C6.enrich	MYB	ERF
TraesCS1B02G055200	C5	C5.enrich	TraesCS3A02G149000	C6	C6.enrich	MYB	ERF
TraesCS1B02G055200	C5	C5.enrich	TraesCS6D02G225700	C6	C6.enrich	MYB	ERF
TraesCS1B02G055200	C5	C5.enrich	TraesCS6B02G280800	C6	C6.enrich	MYB	ERF
TraesCS1B02G055200	C5	C5.enrich	TraesCS6D02G281200	C6	C6.enrich	MYB	ERF
TraesCS1B02G055200	C5	C5.enrich	TraesCS7A02G145800	C6	C6.enrich	MYB	ERF
TraesCS1B02G055200	C5	C5.enrich	TraesCS4D02G120200	C6	C6.enrich	MYB	ERF
TraesCS1B02G055200	C5	C5.enrich	TraesCS1D02G055600	C6	C6.enrich	MYB	C2H2
TraesCS1B02G192200	C5	C5.enrich	TraesCS2D02G286300	C6	C6.enrich	NAC	ERF
TraesCS1B02G192200	C5	C5.enrich	TraesCS6D02G049300	C6	C6.enrich	NAC	C2H2
TraesCS1B02G192200	C5	C5.enrich	TraesCS4D02G120200	C6	C6.enrich	NAC	ERF
TraesCS1B02G192200	C5	C5.enrich	TraesCS4A02G193100	C6	C6.enrich	NAC	ERF
TraesCS1B02G192200	C5	C5.enrich	TraesCS4B02G122100	C6	C6.enrich	NAC	ERF
TraesCS1B02G192200	C5	C5.enrich	TraesCS5A02G424600	C6	C6.enrich	NAC	ERF
TraesCS1B02G192200	C5	C5.enrich	TraesCS7A02G145800	C6	C6.enrich	NAC	ERF
TraesCS1B02G192200	C5	C5.enrich	TraesCS4D02G267500	C6	C6.enrich	NAC	ERF
TraesCS1B02G274300	C5	C5.enrich	TraesCS2D02G286300	C6	C6.enrich	NAC	ERF
TraesCS1B02G274300	C5	C5.enrich	TraesCS6D02G049300	C6	C6.enrich	NAC	C2H2
TraesCS1B02G274300	C5	C5.enrich	TraesCS4D02G120200	C6	C6.enrich	NAC	ERF
TraesCS1B02G274300	C5	C5.enrich	TraesCS4A02G193100	C6	C6.enrich	NAC	ERF
TraesCS1B02G274300	C5	C5.enrich	TraesCS4B02G122100	C6	C6.enrich	NAC	ERF
TraesCS1B02G274300	C5	C5.enrich	TraesCS5A02G424600	C6	C6.enrich	NAC	ERF
TraesCS1B02G274300	C5	C5.enrich	TraesCS7A02G145800	C6	C6.enrich	NAC	ERF
TraesCS1B02G274300	C5	C5.enrich	TraesCS4D02G267500	C6	C6.enrich	NAC	ERF
TraesCS1B02G282300	C5	C5.enrich	TraesCS1B02G071700	C6	C6.enrich	ERF	C2H2
TraesCS1B02G282300	C5	C5.enrich	TraesCS1D02G055600	C6	C6.enrich	ERF	C2H2
TraesCS1B02G282300	C5	C5.enrich	TraesCS4B02G101400	C6	C6.enrich	ERF	B3
TraesCS1B02G282300	C5	C5.enrich	TraesCS4B02G122100	C6	C6.enrich	ERF	ERF
TraesCS1B02G282300	C5	C5.enrich	TraesCS4D02G120200	C6	C6.enrich	ERF	ERF
TraesCS1B02G282300	C5	C5.enrich	TraesCS4D02G267500	C6	C6.enrich	ERF	ERF
TraesCS1B02G282300	C5	C5.enrich	TraesCS6B02G280800	C6	C6.enrich	ERF	ERF
TraesCS1B02G282300	C5	C5.enrich	TraesCS5A02G424600	C6	C6.enrich	ERF	ERF
TraesCS1B02G282300	C5	C5.enrich	TraesCS6D02G281200	C6	C6.enrich	ERF	ERF
TraesCS1B02G282300	C5	C5.enrich	TraesCS6D02G225700	C6	C6.enrich	ERF	ERF
TraesCS1B02G282300	C5	C5.enrich	TraesCS6A02G243500	C6	C6.enrich	ERF	ERF
TraesCS1B02G282300	C5	C5.enrich	TraesCS7A02G145800	C6	C6.enrich	ERF	ERF
TraesCS1B02G282300	C5	C5.enrich	TraesCS4B02G268100	C6	C6.enrich	ERF	ERF
TraesCS1B02G285900	C5	C5.enrich	TraesCS2D02G286300	C6	C6.enrich	C2H2	ERF
TraesCS1B02G285900	C5	C5.enrich	TraesCS3B02G505100	C6	C6.enrich	C2H2	B3
TraesCS1B02G285900	C5	C5.enrich	TraesCS4D02G120200	C6	C6.enrich	C2H2	ERF
TraesCS1B02G285900	C5	C5.enrich	TraesCS7A02G145800	C6	C6.enrich	C2H2	ERF
TraesCS1B02G346300	C5	C5.enrich	TraesCS5A02G424600	C6	C6.enrich	TCP	ERF
TraesCS1B02G346300	C5	C5.enrich	TraesCS4D02G120200	C6	C6.enrich	TCP	ERF
TraesCS1B02G346300	C5	C5.enrich	TraesCS4A02G193100	C6	C6.enrich	TCP	ERF
TraesCS1B02G347400	C5	C5.enrich	TraesCS6B02G280800	C6	C6.enrich	Dof	ERF
TraesCS1B02G347400	C5	C5.enrich	TraesCS6D02G281200	C6	C6.enrich	Dof	ERF
TraesCS1B02G347900	C5	C5.enrich	TraesCS3B02G505100	C6	C6.enrich	ARF	B3
TraesCS1B02G347900	C5	C5.enrich	TraesCS4D02G267500	C6	C6.enrich	ARF	ERF
TraesCS1B02G347900	C5	C5.enrich	TraesCS4D02G120200	C6	C6.enrich	ARF	ERF
TraesCS1B02G439800	C5	C5.enrich	TraesCS3B02G505100	C6	C6.enrich	bZIP	B3
TraesCS1B02G439800	C5	C5.enrich	TraesCS6D02G225700	C6	C6.enrich	bZIP	ERF
TraesCS1B02G439800	C5	C5.enrich	TraesCS3A02G149000	C6	C6.enrich	bZIP	ERF
TraesCS1B02G439800	C5	C5.enrich	TraesCS3D02G157100	C6	C6.enrich	bZIP	ERF
TraesCS1B02G439800	C5	C5.enrich	TraesCS4A02G193100	C6	C6.enrich	bZIP	ERF
TraesCS1B02G439800	C5	C5.enrich	TraesCS4B02G122100	C6	C6.enrich	bZIP	ERF
TraesCS1D02G194200	C5	C5.enrich	TraesCS2D02G286300	C6	C6.enrich	NAC	ERF
TraesCS1D02G194200	C5	C5.enrich	TraesCS6D02G049300	C6	C6.enrich	NAC	C2H2
TraesCS1D02G194200	C5	C5.enrich	TraesCS4D02G120200	C6	C6.enrich	NAC	ERF
TraesCS1D02G194200	C5	C5.enrich	TraesCS4A02G193100	C6	C6.enrich	NAC	ERF
TraesCS1D02G194200	C5	C5.enrich	TraesCS4B02G122100	C6	C6.enrich	NAC	ERF
TraesCS1D02G194200	C5	C5.enrich	TraesCS5A02G424600	C6	C6.enrich	NAC	ERF
TraesCS1D02G194200	C5	C5.enrich	TraesCS7A02G145800	C6	C6.enrich	NAC	ERF
TraesCS1D02G194200	C5	C5.enrich	TraesCS4D02G267500	C6	C6.enrich	NAC	ERF
TraesCS1D02G225000	C5	C5.enrich	TraesCS1B02G071700	C6	C6.enrich	ERF	C2H2
TraesCS1D02G225000	C5	C5.enrich	TraesCS1D02G055600	C6	C6.enrich	ERF	C2H2
TraesCS1D02G225000	C5	C5.enrich	TraesCS4B02G101400	C6	C6.enrich	ERF	B3
TraesCS1D02G225000	C5	C5.enrich	TraesCS4B02G122100	C6	C6.enrich	ERF	ERF
TraesCS1D02G225000	C5	C5.enrich	TraesCS4D02G120200	C6	C6.enrich	ERF	ERF
TraesCS1D02G225000	C5	C5.enrich	TraesCS4D02G267500	C6	C6.enrich	ERF	ERF
TraesCS1D02G225000	C5	C5.enrich	TraesCS6B02G280800	C6	C6.enrich	ERF	ERF
TraesCS1D02G225000	C5	C5.enrich	TraesCS5A02G424600	C6	C6.enrich	ERF	ERF
TraesCS1D02G225000	C5	C5.enrich	TraesCS6D02G281200	C6	C6.enrich	ERF	ERF
TraesCS1D02G225000	C5	C5.enrich	TraesCS6D02G225700	C6	C6.enrich	ERF	ERF
TraesCS1D02G225000	C5	C5.enrich	TraesCS6A02G243500	C6	C6.enrich	ERF	ERF
TraesCS1D02G225000	C5	C5.enrich	TraesCS7A02G145800	C6	C6.enrich	ERF	ERF
TraesCS1D02G225000	C5	C5.enrich	TraesCS4B02G268100	C6	C6.enrich	ERF	ERF
TraesCS1D02G244500	C5	C5.enrich	TraesCS1B02G071700	C6	C6.enrich	ERF	C2H2
TraesCS1D02G244500	C5	C5.enrich	TraesCS1D02G055600	C6	C6.enrich	ERF	C2H2
TraesCS1D02G244500	C5	C5.enrich	TraesCS4B02G101400	C6	C6.enrich	ERF	B3
TraesCS1D02G244500	C5	C5.enrich	TraesCS4B02G122100	C6	C6.enrich	ERF	ERF
TraesCS1D02G244500	C5	C5.enrich	TraesCS4D02G120200	C6	C6.enrich	ERF	ERF
TraesCS1D02G244500	C5	C5.enrich	TraesCS4D02G267500	C6	C6.enrich	ERF	ERF
TraesCS1D02G244500	C5	C5.enrich	TraesCS6B02G280800	C6	C6.enrich	ERF	ERF
TraesCS1D02G244500	C5	C5.enrich	TraesCS5A02G424600	C6	C6.enrich	ERF	ERF
TraesCS1D02G244500	C5	C5.enrich	TraesCS6D02G281200	C6	C6.enrich	ERF	ERF
TraesCS1D02G244500	C5	C5.enrich	TraesCS6D02G225700	C6	C6.enrich	ERF	ERF
TraesCS1D02G244500	C5	C5.enrich	TraesCS6A02G243500	C6	C6.enrich	ERF	ERF
TraesCS1D02G244500	C5	C5.enrich	TraesCS7A02G145800	C6	C6.enrich	ERF	ERF
TraesCS1D02G244500	C5	C5.enrich	TraesCS4B02G268100	C6	C6.enrich	ERF	ERF
TraesCS1D02G263800	C5	C5.enrich	TraesCS2D02G286300	C6	C6.enrich	NAC	ERF
TraesCS1D02G263800	C5	C5.enrich	TraesCS6D02G049300	C6	C6.enrich	NAC	C2H2
TraesCS1D02G263800	C5	C5.enrich	TraesCS4D02G120200	C6	C6.enrich	NAC	ERF
TraesCS1D02G263800	C5	C5.enrich	TraesCS4A02G193100	C6	C6.enrich	NAC	ERF
TraesCS1D02G263800	C5	C5.enrich	TraesCS4B02G122100	C6	C6.enrich	NAC	ERF
TraesCS1D02G263800	C5	C5.enrich	TraesCS5A02G424600	C6	C6.enrich	NAC	ERF
TraesCS1D02G263800	C5	C5.enrich	TraesCS7A02G145800	C6	C6.enrich	NAC	ERF
TraesCS1D02G263800	C5	C5.enrich	TraesCS4D02G267500	C6	C6.enrich	NAC	ERF
TraesCS1D02G272600	C5	C5.enrich	TraesCS1B02G071700	C6	C6.enrich	ERF	C2H2
TraesCS1D02G272600	C5	C5.enrich	TraesCS1D02G055600	C6	C6.enrich	ERF	C2H2
TraesCS1D02G272600	C5	C5.enrich	TraesCS4B02G101400	C6	C6.enrich	ERF	B3
TraesCS1D02G272600	C5	C5.enrich	TraesCS4B02G122100	C6	C6.enrich	ERF	ERF
TraesCS1D02G272600	C5	C5.enrich	TraesCS4D02G120200	C6	C6.enrich	ERF	ERF
TraesCS1D02G272600	C5	C5.enrich	TraesCS4D02G267500	C6	C6.enrich	ERF	ERF
TraesCS1D02G272600	C5	C5.enrich	TraesCS6B02G280800	C6	C6.enrich	ERF	ERF
TraesCS1D02G272600	C5	C5.enrich	TraesCS5A02G424600	C6	C6.enrich	ERF	ERF
TraesCS1D02G272600	C5	C5.enrich	TraesCS6D02G281200	C6	C6.enrich	ERF	ERF
TraesCS1D02G272600	C5	C5.enrich	TraesCS6D02G225700	C6	C6.enrich	ERF	ERF
TraesCS1D02G272600	C5	C5.enrich	TraesCS6A02G243500	C6	C6.enrich	ERF	ERF
TraesCS1D02G272600	C5	C5.enrich	TraesCS7A02G145800	C6	C6.enrich	ERF	ERF
TraesCS1D02G272600	C5	C5.enrich	TraesCS4B02G268100	C6	C6.enrich	ERF	ERF
TraesCS1D02G337400	C5	C5.enrich	TraesCS3B02G505100	C6	C6.enrich	ARF	B3
TraesCS1D02G337400	C5	C5.enrich	TraesCS4D02G267500	C6	C6.enrich	ARF	ERF
TraesCS1D02G337400	C5	C5.enrich	TraesCS4D02G120200	C6	C6.enrich	ARF	ERF
TraesCS1D02G418900	C5	C5.enrich	TraesCS1B02G071700	C6	C6.enrich	ERF	C2H2
TraesCS1D02G418900	C5	C5.enrich	TraesCS1D02G055600	C6	C6.enrich	ERF	C2H2
TraesCS1D02G418900	C5	C5.enrich	TraesCS4B02G101400	C6	C6.enrich	ERF	B3
TraesCS1D02G418900	C5	C5.enrich	TraesCS4B02G122100	C6	C6.enrich	ERF	ERF
TraesCS1D02G418900	C5	C5.enrich	TraesCS4D02G120200	C6	C6.enrich	ERF	ERF
TraesCS1D02G418900	C5	C5.enrich	TraesCS4D02G267500	C6	C6.enrich	ERF	ERF
TraesCS1D02G418900	C5	C5.enrich	TraesCS6B02G280800	C6	C6.enrich	ERF	ERF
TraesCS1D02G418900	C5	C5.enrich	TraesCS5A02G424600	C6	C6.enrich	ERF	ERF
TraesCS1D02G418900	C5	C5.enrich	TraesCS6D02G281200	C6	C6.enrich	ERF	ERF
TraesCS1D02G418900	C5	C5.enrich	TraesCS6D02G225700	C6	C6.enrich	ERF	ERF
TraesCS1D02G418900	C5	C5.enrich	TraesCS6A02G243500	C6	C6.enrich	ERF	ERF
TraesCS1D02G418900	C5	C5.enrich	TraesCS7A02G145800	C6	C6.enrich	ERF	ERF
TraesCS1D02G418900	C5	C5.enrich	TraesCS4B02G268100	C6	C6.enrich	ERF	ERF
TraesCS2A02G100600	C5	C5.enrich	TraesCS6B02G280800	C6	C6.enrich	G2-like	ERF
TraesCS2A02G100600	C5	C5.enrich	TraesCS5A02G424600	C6	C6.enrich	G2-like	ERF
TraesCS2A02G100700	C5	C5.enrich	TraesCS6D02G281200	C6	C6.enrich	WOX	ERF
TraesCS2A02G225900	C5	C5.enrich	TraesCS6B02G280800	C6	C6.enrich	Dof	ERF
TraesCS2A02G225900	C5	C5.enrich	TraesCS6D02G281200	C6	C6.enrich	Dof	ERF
TraesCS2A02G306800	C5	C5.enrich	TraesCS2D02G286300	C6	C6.enrich	NAC	ERF
TraesCS2A02G306800	C5	C5.enrich	TraesCS6D02G049300	C6	C6.enrich	NAC	C2H2
TraesCS2A02G306800	C5	C5.enrich	TraesCS4D02G120200	C6	C6.enrich	NAC	ERF
TraesCS2A02G306800	C5	C5.enrich	TraesCS4A02G193100	C6	C6.enrich	NAC	ERF
TraesCS2A02G306800	C5	C5.enrich	TraesCS4B02G122100	C6	C6.enrich	NAC	ERF
TraesCS2A02G306800	C5	C5.enrich	TraesCS5A02G424600	C6	C6.enrich	NAC	ERF
TraesCS2A02G306800	C5	C5.enrich	TraesCS7A02G145800	C6	C6.enrich	NAC	ERF
TraesCS2A02G306800	C5	C5.enrich	TraesCS4D02G267500	C6	C6.enrich	NAC	ERF
TraesCS2A02G389400	C5	C5.enrich	TraesCS2D02G286300	C6	C6.enrich	HD-ZIP	ERF
TraesCS2A02G389400	C5	C5.enrich	TraesCS7A02G145800	C6	C6.enrich	HD-ZIP	ERF
TraesCS2A02G389400	C5	C5.enrich	TraesCS6D02G281200	C6	C6.enrich	HD-ZIP	ERF
TraesCS2A02G389400	C5	C5.enrich	TraesCS2A02G288000	C6	C6.enrich	HD-ZIP	ERF
TraesCS2A02G389400	C5	C5.enrich	TraesCS6D02G225700	C6	C6.enrich	HD-ZIP	ERF
TraesCS2A02G394700	C5	C5.enrich	TraesCS5B02G426600	C6	C6.enrich	B3	ERF
TraesCS2A02G394700	C5	C5.enrich	TraesCS6D02G225700	C6	C6.enrich	B3	ERF
TraesCS2A02G403200	C5	C5.enrich	TraesCS2D02G286300	C6	C6.enrich	C2H2	ERF
TraesCS2A02G403200	C5	C5.enrich	TraesCS3B02G505100	C6	C6.enrich	C2H2	B3
TraesCS2A02G403200	C5	C5.enrich	TraesCS4D02G120200	C6	C6.enrich	C2H2	ERF
TraesCS2A02G403200	C5	C5.enrich	TraesCS7A02G145800	C6	C6.enrich	C2H2	ERF
TraesCS2A02G417100	C5	C5.enrich	TraesCS1B02G071700	C6	C6.enrich	ERF	C2H2
TraesCS2A02G417100	C5	C5.enrich	TraesCS1D02G055600	C6	C6.enrich	ERF	C2H2
TraesCS2A02G417100	C5	C5.enrich	TraesCS4B02G101400	C6	C6.enrich	ERF	B3
TraesCS2A02G417100	C5	C5.enrich	TraesCS4B02G122100	C6	C6.enrich	ERF	ERF
TraesCS2A02G417100	C5	C5.enrich	TraesCS4D02G120200	C6	C6.enrich	ERF	ERF
TraesCS2A02G417100	C5	C5.enrich	TraesCS4D02G267500	C6	C6.enrich	ERF	ERF
TraesCS2A02G417100	C5	C5.enrich	TraesCS6B02G280800	C6	C6.enrich	ERF	ERF
TraesCS2A02G417100	C5	C5.enrich	TraesCS5A02G424600	C6	C6.enrich	ERF	ERF
TraesCS2A02G417100	C5	C5.enrich	TraesCS6D02G281200	C6	C6.enrich	ERF	ERF
TraesCS2A02G417100	C5	C5.enrich	TraesCS6D02G225700	C6	C6.enrich	ERF	ERF
TraesCS2A02G417100	C5	C5.enrich	TraesCS6A02G243500	C6	C6.enrich	ERF	ERF
TraesCS2A02G417100	C5	C5.enrich	TraesCS7A02G145800	C6	C6.enrich	ERF	ERF
TraesCS2A02G417100	C5	C5.enrich	TraesCS4B02G268100	C6	C6.enrich	ERF	ERF
TraesCS2A02G417200	C5	C5.enrich	TraesCS1B02G071700	C6	C6.enrich	ERF	C2H2
TraesCS2A02G417200	C5	C5.enrich	TraesCS1D02G055600	C6	C6.enrich	ERF	C2H2
TraesCS2A02G417200	C5	C5.enrich	TraesCS4B02G101400	C6	C6.enrich	ERF	B3
TraesCS2A02G417200	C5	C5.enrich	TraesCS4B02G122100	C6	C6.enrich	ERF	ERF
TraesCS2A02G417200	C5	C5.enrich	TraesCS4D02G120200	C6	C6.enrich	ERF	ERF
TraesCS2A02G417200	C5	C5.enrich	TraesCS4D02G267500	C6	C6.enrich	ERF	ERF
TraesCS2A02G417200	C5	C5.enrich	TraesCS6B02G280800	C6	C6.enrich	ERF	ERF
TraesCS2A02G417200	C5	C5.enrich	TraesCS5A02G424600	C6	C6.enrich	ERF	ERF
TraesCS2A02G417200	C5	C5.enrich	TraesCS6D02G281200	C6	C6.enrich	ERF	ERF
TraesCS2A02G417200	C5	C5.enrich	TraesCS6D02G225700	C6	C6.enrich	ERF	ERF
TraesCS2A02G417200	C5	C5.enrich	TraesCS6A02G243500	C6	C6.enrich	ERF	ERF
TraesCS2A02G417200	C5	C5.enrich	TraesCS7A02G145800	C6	C6.enrich	ERF	ERF
TraesCS2A02G417200	C5	C5.enrich	TraesCS4B02G268100	C6	C6.enrich	ERF	ERF
TraesCS2A02G445500	C5	C5.enrich	TraesCS4B02G122100	C6	C6.enrich	MYB	ERF
TraesCS2A02G445500	C5	C5.enrich	TraesCS5B02G426600	C6	C6.enrich	MYB	ERF
TraesCS2A02G445500	C5	C5.enrich	TraesCS3A02G149000	C6	C6.enrich	MYB	ERF
TraesCS2A02G445500	C5	C5.enrich	TraesCS6D02G225700	C6	C6.enrich	MYB	ERF
TraesCS2A02G445500	C5	C5.enrich	TraesCS6B02G280800	C6	C6.enrich	MYB	ERF
TraesCS2A02G445500	C5	C5.enrich	TraesCS6D02G281200	C6	C6.enrich	MYB	ERF
TraesCS2A02G445500	C5	C5.enrich	TraesCS7A02G145800	C6	C6.enrich	MYB	ERF
TraesCS2A02G445500	C5	C5.enrich	TraesCS4D02G120200	C6	C6.enrich	MYB	ERF
TraesCS2A02G445500	C5	C5.enrich	TraesCS1D02G055600	C6	C6.enrich	MYB	C2H2
TraesCS2A02G467100	C5	C5.enrich	TraesCS6D02G281200	C6	C6.enrich	bZIP	ERF
TraesCS2A02G467100	C5	C5.enrich	TraesCS3B02G505100	C6	C6.enrich	bZIP	B3
TraesCS2A02G591000	C5	C5.enrich	TraesCS6B02G280800	C6	C6.enrich	Dof	ERF
TraesCS2A02G591000	C5	C5.enrich	TraesCS6D02G281200	C6	C6.enrich	Dof	ERF
TraesCS2A02G591100	C5	C5.enrich	TraesCS6B02G280800	C6	C6.enrich	Dof	ERF
TraesCS2A02G591100	C5	C5.enrich	TraesCS6D02G281200	C6	C6.enrich	Dof	ERF
TraesCS2A02G591200	C5	C5.enrich	TraesCS6B02G280800	C6	C6.enrich	Dof	ERF
TraesCS2A02G591200	C5	C5.enrich	TraesCS6D02G281200	C6	C6.enrich	Dof	ERF
TraesCS2B02G117800	C5	C5.enrich	TraesCS6B02G280800	C6	C6.enrich	G2-like	ERF
TraesCS2B02G117800	C5	C5.enrich	TraesCS5A02G424600	C6	C6.enrich	G2-like	ERF
TraesCS2B02G117900	C5	C5.enrich	TraesCS6D02G281200	C6	C6.enrich	WOX	ERF
TraesCS2B02G407600	C5	C5.enrich	TraesCS2A02G288000	C6	C6.enrich	HD-ZIP	ERF
TraesCS2B02G407600	C5	C5.enrich	TraesCS2D02G286300	C6	C6.enrich	HD-ZIP	ERF
TraesCS2B02G407600	C5	C5.enrich	TraesCS7A02G145800	C6	C6.enrich	HD-ZIP	ERF
TraesCS2B02G407600	C5	C5.enrich	TraesCS6D02G281200	C6	C6.enrich	HD-ZIP	ERF
TraesCS2B02G407600	C5	C5.enrich	TraesCS6D02G225700	C6	C6.enrich	HD-ZIP	ERF
TraesCS2B02G421100	C5	C5.enrich	TraesCS2D02G286300	C6	C6.enrich	C2H2	ERF
TraesCS2B02G421100	C5	C5.enrich	TraesCS3B02G505100	C6	C6.enrich	C2H2	B3
TraesCS2B02G421100	C5	C5.enrich	TraesCS4D02G120200	C6	C6.enrich	C2H2	ERF
TraesCS2B02G421100	C5	C5.enrich	TraesCS7A02G145800	C6	C6.enrich	C2H2	ERF
TraesCS2B02G431800	C5	C5.enrich	TraesCS4A02G193100	C6	C6.enrich	C2H2	ERF
TraesCS2B02G431800	C5	C5.enrich	TraesCS4B02G122100	C6	C6.enrich	C2H2	ERF
TraesCS2B02G431800	C5	C5.enrich	TraesCS4D02G120200	C6	C6.enrich	C2H2	ERF
TraesCS2B02G431800	C5	C5.enrich	TraesCS7A02G145800	C6	C6.enrich	C2H2	ERF
TraesCS2B02G431800	C5	C5.enrich	TraesCS3B02G505100	C6	C6.enrich	C2H2	B3
TraesCS2B02G431800	C5	C5.enrich	TraesCS6D02G049300	C6	C6.enrich	C2H2	C2H2
TraesCS2B02G436100	C5	C5.enrich	TraesCS1B02G071700	C6	C6.enrich	ERF	C2H2
TraesCS2B02G436100	C5	C5.enrich	TraesCS1D02G055600	C6	C6.enrich	ERF	C2H2
TraesCS2B02G436100	C5	C5.enrich	TraesCS4B02G101400	C6	C6.enrich	ERF	B3
TraesCS2B02G436100	C5	C5.enrich	TraesCS4B02G122100	C6	C6.enrich	ERF	ERF
TraesCS2B02G436100	C5	C5.enrich	TraesCS4D02G120200	C6	C6.enrich	ERF	ERF
TraesCS2B02G436100	C5	C5.enrich	TraesCS4D02G267500	C6	C6.enrich	ERF	ERF
TraesCS2B02G436100	C5	C5.enrich	TraesCS6B02G280800	C6	C6.enrich	ERF	ERF
TraesCS2B02G436100	C5	C5.enrich	TraesCS5A02G424600	C6	C6.enrich	ERF	ERF
TraesCS2B02G436100	C5	C5.enrich	TraesCS6D02G281200	C6	C6.enrich	ERF	ERF
TraesCS2B02G436100	C5	C5.enrich	TraesCS6D02G225700	C6	C6.enrich	ERF	ERF
TraesCS2B02G436100	C5	C5.enrich	TraesCS6A02G243500	C6	C6.enrich	ERF	ERF
TraesCS2B02G436100	C5	C5.enrich	TraesCS7A02G145800	C6	C6.enrich	ERF	ERF
TraesCS2B02G436100	C5	C5.enrich	TraesCS4B02G268100	C6	C6.enrich	ERF	ERF
TraesCS2B02G497500	C5	C5.enrich	TraesCS2A02G288000	C6	C6.enrich	HD-ZIP	ERF
TraesCS2B02G497500	C5	C5.enrich	TraesCS2D02G286300	C6	C6.enrich	HD-ZIP	ERF
TraesCS2B02G497500	C5	C5.enrich	TraesCS7A02G145800	C6	C6.enrich	HD-ZIP	ERF
TraesCS2B02G497500	C5	C5.enrich	TraesCS6D02G225700	C6	C6.enrich	HD-ZIP	ERF
TraesCS2B02G592600	C5	C5.enrich	TraesCS6B02G280800	C6	C6.enrich	Dof	ERF
TraesCS2B02G592600	C5	C5.enrich	TraesCS6D02G281200	C6	C6.enrich	Dof	ERF
TraesCS2D02G100100	C5	C5.enrich	TraesCS6B02G280800	C6	C6.enrich	G2-like	ERF
TraesCS2D02G100100	C5	C5.enrich	TraesCS5A02G424600	C6	C6.enrich	G2-like	ERF
TraesCS2D02G100200	C5	C5.enrich	TraesCS6D02G281200	C6	C6.enrich	WOX	ERF
TraesCS2D02G101400	C5	C5.enrich	TraesCS2D02G286300	C6	C6.enrich	NAC	ERF
TraesCS2D02G101400	C5	C5.enrich	TraesCS6D02G049300	C6	C6.enrich	NAC	C2H2
TraesCS2D02G101400	C5	C5.enrich	TraesCS4D02G120200	C6	C6.enrich	NAC	ERF
TraesCS2D02G101400	C5	C5.enrich	TraesCS4A02G193100	C6	C6.enrich	NAC	ERF
TraesCS2D02G101400	C5	C5.enrich	TraesCS4B02G122100	C6	C6.enrich	NAC	ERF
TraesCS2D02G101400	C5	C5.enrich	TraesCS5A02G424600	C6	C6.enrich	NAC	ERF
TraesCS2D02G101400	C5	C5.enrich	TraesCS7A02G145800	C6	C6.enrich	NAC	ERF
TraesCS2D02G101400	C5	C5.enrich	TraesCS4D02G267500	C6	C6.enrich	NAC	ERF
TraesCS2D02G305300	C5	C5.enrich	TraesCS2D02G286300	C6	C6.enrich	NAC	ERF
TraesCS2D02G305300	C5	C5.enrich	TraesCS6D02G049300	C6	C6.enrich	NAC	C2H2
TraesCS2D02G305300	C5	C5.enrich	TraesCS4D02G120200	C6	C6.enrich	NAC	ERF
TraesCS2D02G305300	C5	C5.enrich	TraesCS4A02G193100	C6	C6.enrich	NAC	ERF
TraesCS2D02G305300	C5	C5.enrich	TraesCS4B02G122100	C6	C6.enrich	NAC	ERF
TraesCS2D02G305300	C5	C5.enrich	TraesCS5A02G424600	C6	C6.enrich	NAC	ERF
TraesCS2D02G305300	C5	C5.enrich	TraesCS7A02G145800	C6	C6.enrich	NAC	ERF
TraesCS2D02G305300	C5	C5.enrich	TraesCS4D02G267500	C6	C6.enrich	NAC	ERF
TraesCS2D02G387300	C5	C5.enrich	TraesCS2A02G288000	C6	C6.enrich	HD-ZIP	ERF
TraesCS2D02G387300	C5	C5.enrich	TraesCS2D02G286300	C6	C6.enrich	HD-ZIP	ERF
TraesCS2D02G387300	C5	C5.enrich	TraesCS7A02G145800	C6	C6.enrich	HD-ZIP	ERF
TraesCS2D02G387300	C5	C5.enrich	TraesCS6D02G281200	C6	C6.enrich	HD-ZIP	ERF
TraesCS2D02G387300	C5	C5.enrich	TraesCS6D02G225700	C6	C6.enrich	HD-ZIP	ERF
TraesCS2D02G400300	C5	C5.enrich	TraesCS2D02G286300	C6	C6.enrich	C2H2	ERF
TraesCS2D02G400300	C5	C5.enrich	TraesCS3B02G505100	C6	C6.enrich	C2H2	B3
TraesCS2D02G400300	C5	C5.enrich	TraesCS4D02G120200	C6	C6.enrich	C2H2	ERF
TraesCS2D02G400300	C5	C5.enrich	TraesCS7A02G145800	C6	C6.enrich	C2H2	ERF
TraesCS2D02G414300	C5	C5.enrich	TraesCS1B02G071700	C6	C6.enrich	ERF	C2H2
TraesCS2D02G414300	C5	C5.enrich	TraesCS1D02G055600	C6	C6.enrich	ERF	C2H2
TraesCS2D02G414300	C5	C5.enrich	TraesCS4B02G101400	C6	C6.enrich	ERF	B3
TraesCS2D02G414300	C5	C5.enrich	TraesCS4B02G122100	C6	C6.enrich	ERF	ERF
TraesCS2D02G414300	C5	C5.enrich	TraesCS4D02G120200	C6	C6.enrich	ERF	ERF
TraesCS2D02G414300	C5	C5.enrich	TraesCS4D02G267500	C6	C6.enrich	ERF	ERF
TraesCS2D02G414300	C5	C5.enrich	TraesCS6B02G280800	C6	C6.enrich	ERF	ERF
TraesCS2D02G414300	C5	C5.enrich	TraesCS5A02G424600	C6	C6.enrich	ERF	ERF
TraesCS2D02G414300	C5	C5.enrich	TraesCS6D02G281200	C6	C6.enrich	ERF	ERF
TraesCS2D02G414300	C5	C5.enrich	TraesCS6D02G225700	C6	C6.enrich	ERF	ERF
TraesCS2D02G414300	C5	C5.enrich	TraesCS6A02G243500	C6	C6.enrich	ERF	ERF
TraesCS2D02G414300	C5	C5.enrich	TraesCS7A02G145800	C6	C6.enrich	ERF	ERF
TraesCS2D02G414300	C5	C5.enrich	TraesCS4B02G268100	C6	C6.enrich	ERF	ERF
TraesCS2D02G414500	C5	C5.enrich	TraesCS1B02G071700	C6	C6.enrich	ERF	C2H2
TraesCS2D02G414500	C5	C5.enrich	TraesCS1D02G055600	C6	C6.enrich	ERF	C2H2
TraesCS2D02G414500	C5	C5.enrich	TraesCS4B02G101400	C6	C6.enrich	ERF	B3
TraesCS2D02G414500	C5	C5.enrich	TraesCS4B02G122100	C6	C6.enrich	ERF	ERF
TraesCS2D02G414500	C5	C5.enrich	TraesCS4D02G120200	C6	C6.enrich	ERF	ERF
TraesCS2D02G414500	C5	C5.enrich	TraesCS4D02G267500	C6	C6.enrich	ERF	ERF
TraesCS2D02G414500	C5	C5.enrich	TraesCS6B02G280800	C6	C6.enrich	ERF	ERF
TraesCS2D02G414500	C5	C5.enrich	TraesCS5A02G424600	C6	C6.enrich	ERF	ERF
TraesCS2D02G414500	C5	C5.enrich	TraesCS6D02G281200	C6	C6.enrich	ERF	ERF
TraesCS2D02G414500	C5	C5.enrich	TraesCS6D02G225700	C6	C6.enrich	ERF	ERF
TraesCS2D02G414500	C5	C5.enrich	TraesCS6A02G243500	C6	C6.enrich	ERF	ERF
TraesCS2D02G414500	C5	C5.enrich	TraesCS7A02G145800	C6	C6.enrich	ERF	ERF
TraesCS2D02G414500	C5	C5.enrich	TraesCS4B02G268100	C6	C6.enrich	ERF	ERF
TraesCS2D02G444200	C5	C5.enrich	TraesCS4B02G122100	C6	C6.enrich	MYB	ERF
TraesCS2D02G444200	C5	C5.enrich	TraesCS5B02G426600	C6	C6.enrich	MYB	ERF
TraesCS2D02G444200	C5	C5.enrich	TraesCS3A02G149000	C6	C6.enrich	MYB	ERF
TraesCS2D02G444200	C5	C5.enrich	TraesCS6D02G225700	C6	C6.enrich	MYB	ERF
TraesCS2D02G444200	C5	C5.enrich	TraesCS6B02G280800	C6	C6.enrich	MYB	ERF
TraesCS2D02G444200	C5	C5.enrich	TraesCS6D02G281200	C6	C6.enrich	MYB	ERF
TraesCS2D02G444200	C5	C5.enrich	TraesCS7A02G145800	C6	C6.enrich	MYB	ERF
TraesCS2D02G444200	C5	C5.enrich	TraesCS4D02G120200	C6	C6.enrich	MYB	ERF
TraesCS2D02G444200	C5	C5.enrich	TraesCS1D02G055600	C6	C6.enrich	MYB	C2H2
TraesCS2D02G444300	C5	C5.enrich	TraesCS4B02G122100	C6	C6.enrich	MYB	ERF
TraesCS2D02G444300	C5	C5.enrich	TraesCS5B02G426600	C6	C6.enrich	MYB	ERF
TraesCS2D02G444300	C5	C5.enrich	TraesCS3A02G149000	C6	C6.enrich	MYB	ERF
TraesCS2D02G444300	C5	C5.enrich	TraesCS6D02G225700	C6	C6.enrich	MYB	ERF
TraesCS2D02G444300	C5	C5.enrich	TraesCS6B02G280800	C6	C6.enrich	MYB	ERF
TraesCS2D02G444300	C5	C5.enrich	TraesCS6D02G281200	C6	C6.enrich	MYB	ERF
TraesCS2D02G444300	C5	C5.enrich	TraesCS7A02G145800	C6	C6.enrich	MYB	ERF
TraesCS2D02G444300	C5	C5.enrich	TraesCS4D02G120200	C6	C6.enrich	MYB	ERF
TraesCS2D02G444300	C5	C5.enrich	TraesCS1D02G055600	C6	C6.enrich	MYB	C2H2
TraesCS2D02G563000	C5	C5.enrich	TraesCS6B02G280800	C6	C6.enrich	Dof	ERF
TraesCS2D02G563000	C5	C5.enrich	TraesCS6D02G281200	C6	C6.enrich	Dof	ERF
TraesCS2D02G563100	C5	C5.enrich	TraesCS6B02G280800	C6	C6.enrich	Dof	ERF
TraesCS2D02G563100	C5	C5.enrich	TraesCS6D02G281200	C6	C6.enrich	Dof	ERF
TraesCS3A02G041200	C5	C5.enrich	TraesCS1B02G071700	C6	C6.enrich	ERF	C2H2
TraesCS3A02G041200	C5	C5.enrich	TraesCS1D02G055600	C6	C6.enrich	ERF	C2H2
TraesCS3A02G041200	C5	C5.enrich	TraesCS4B02G101400	C6	C6.enrich	ERF	B3
TraesCS3A02G041200	C5	C5.enrich	TraesCS4B02G122100	C6	C6.enrich	ERF	ERF
TraesCS3A02G041200	C5	C5.enrich	TraesCS4D02G120200	C6	C6.enrich	ERF	ERF
TraesCS3A02G041200	C5	C5.enrich	TraesCS4D02G267500	C6	C6.enrich	ERF	ERF
TraesCS3A02G041200	C5	C5.enrich	TraesCS6B02G280800	C6	C6.enrich	ERF	ERF
TraesCS3A02G041200	C5	C5.enrich	TraesCS5A02G424600	C6	C6.enrich	ERF	ERF
TraesCS3A02G041200	C5	C5.enrich	TraesCS6D02G281200	C6	C6.enrich	ERF	ERF
TraesCS3A02G041200	C5	C5.enrich	TraesCS6D02G225700	C6	C6.enrich	ERF	ERF
TraesCS3A02G041200	C5	C5.enrich	TraesCS6A02G243500	C6	C6.enrich	ERF	ERF
TraesCS3A02G041200	C5	C5.enrich	TraesCS7A02G145800	C6	C6.enrich	ERF	ERF
TraesCS3A02G041200	C5	C5.enrich	TraesCS4B02G268100	C6	C6.enrich	ERF	ERF
TraesCS3A02G107400	C5	C5.enrich	TraesCS2D02G286300	C6	C6.enrich	NAC	ERF
TraesCS3A02G107400	C5	C5.enrich	TraesCS6D02G049300	C6	C6.enrich	NAC	C2H2
TraesCS3A02G107400	C5	C5.enrich	TraesCS4D02G120200	C6	C6.enrich	NAC	ERF
TraesCS3A02G107400	C5	C5.enrich	TraesCS4A02G193100	C6	C6.enrich	NAC	ERF
TraesCS3A02G107400	C5	C5.enrich	TraesCS4B02G122100	C6	C6.enrich	NAC	ERF
TraesCS3A02G107400	C5	C5.enrich	TraesCS5A02G424600	C6	C6.enrich	NAC	ERF
TraesCS3A02G107400	C5	C5.enrich	TraesCS7A02G145800	C6	C6.enrich	NAC	ERF
TraesCS3A02G107400	C5	C5.enrich	TraesCS4D02G267500	C6	C6.enrich	NAC	ERF
TraesCS3A02G123700	C5	C5.enrich	TraesCS6B02G280800	C6	C6.enrich	G2-like	ERF
TraesCS3A02G123700	C5	C5.enrich	TraesCS5A02G424600	C6	C6.enrich	G2-like	ERF
TraesCS3A02G306800	C5	C5.enrich	TraesCS6B02G280800	C6	C6.enrich	Dof	ERF
TraesCS3A02G306800	C5	C5.enrich	TraesCS6D02G281200	C6	C6.enrich	Dof	ERF
TraesCS3A02G336500	C5	C5.enrich	TraesCS4B02G122100	C6	C6.enrich	MYB	ERF
TraesCS3A02G336500	C5	C5.enrich	TraesCS5B02G426600	C6	C6.enrich	MYB	ERF
TraesCS3A02G336500	C5	C5.enrich	TraesCS3A02G149000	C6	C6.enrich	MYB	ERF
TraesCS3A02G336500	C5	C5.enrich	TraesCS6D02G225700	C6	C6.enrich	MYB	ERF
TraesCS3A02G336500	C5	C5.enrich	TraesCS6B02G280800	C6	C6.enrich	MYB	ERF
TraesCS3A02G336500	C5	C5.enrich	TraesCS6D02G281200	C6	C6.enrich	MYB	ERF
TraesCS3A02G336500	C5	C5.enrich	TraesCS7A02G145800	C6	C6.enrich	MYB	ERF
TraesCS3A02G336500	C5	C5.enrich	TraesCS4D02G120200	C6	C6.enrich	MYB	ERF
TraesCS3A02G336500	C5	C5.enrich	TraesCS1D02G055600	C6	C6.enrich	MYB	C2H2
TraesCS3A02G341700	C5	C5.enrich	TraesCS6D02G281200	C6	C6.enrich	WOX	ERF
TraesCS3A02G371700	C5	C5.enrich	TraesCS2D02G286300	C6	C6.enrich	C2H2	ERF
TraesCS3A02G371700	C5	C5.enrich	TraesCS3B02G505100	C6	C6.enrich	C2H2	B3
TraesCS3A02G371700	C5	C5.enrich	TraesCS4D02G120200	C6	C6.enrich	C2H2	ERF
TraesCS3A02G371700	C5	C5.enrich	TraesCS7A02G145800	C6	C6.enrich	C2H2	ERF
TraesCS3A02G379900	C5	C5.enrich	TraesCS1B02G071700	C6	C6.enrich	ERF	C2H2
TraesCS3A02G379900	C5	C5.enrich	TraesCS1D02G055600	C6	C6.enrich	ERF	C2H2
TraesCS3A02G379900	C5	C5.enrich	TraesCS4B02G101400	C6	C6.enrich	ERF	B3
TraesCS3A02G379900	C5	C5.enrich	TraesCS4B02G122100	C6	C6.enrich	ERF	ERF
TraesCS3A02G379900	C5	C5.enrich	TraesCS4D02G120200	C6	C6.enrich	ERF	ERF
TraesCS3A02G379900	C5	C5.enrich	TraesCS4D02G267500	C6	C6.enrich	ERF	ERF
TraesCS3A02G379900	C5	C5.enrich	TraesCS6B02G280800	C6	C6.enrich	ERF	ERF
TraesCS3A02G379900	C5	C5.enrich	TraesCS5A02G424600	C6	C6.enrich	ERF	ERF
TraesCS3A02G379900	C5	C5.enrich	TraesCS6D02G281200	C6	C6.enrich	ERF	ERF
TraesCS3A02G379900	C5	C5.enrich	TraesCS6D02G225700	C6	C6.enrich	ERF	ERF
TraesCS3A02G379900	C5	C5.enrich	TraesCS6A02G243500	C6	C6.enrich	ERF	ERF
TraesCS3A02G379900	C5	C5.enrich	TraesCS7A02G145800	C6	C6.enrich	ERF	ERF
TraesCS3A02G379900	C5	C5.enrich	TraesCS4B02G268100	C6	C6.enrich	ERF	ERF
TraesCS3A02G403300	C5	C5.enrich	TraesCS2D02G286300	C6	C6.enrich	NAC	ERF
TraesCS3A02G403300	C5	C5.enrich	TraesCS6D02G049300	C6	C6.enrich	NAC	C2H2
TraesCS3A02G403300	C5	C5.enrich	TraesCS4D02G120200	C6	C6.enrich	NAC	ERF
TraesCS3A02G403300	C5	C5.enrich	TraesCS4A02G193100	C6	C6.enrich	NAC	ERF
TraesCS3A02G403300	C5	C5.enrich	TraesCS4B02G122100	C6	C6.enrich	NAC	ERF
TraesCS3A02G403300	C5	C5.enrich	TraesCS5A02G424600	C6	C6.enrich	NAC	ERF
TraesCS3A02G403300	C5	C5.enrich	TraesCS7A02G145800	C6	C6.enrich	NAC	ERF
TraesCS3A02G403300	C5	C5.enrich	TraesCS4D02G267500	C6	C6.enrich	NAC	ERF
TraesCS3A02G438900	C5	C5.enrich	TraesCS2D02G286300	C6	C6.enrich	NAC	ERF
TraesCS3A02G438900	C5	C5.enrich	TraesCS6D02G049300	C6	C6.enrich	NAC	C2H2
TraesCS3A02G438900	C5	C5.enrich	TraesCS4D02G120200	C6	C6.enrich	NAC	ERF
TraesCS3A02G438900	C5	C5.enrich	TraesCS4A02G193100	C6	C6.enrich	NAC	ERF
TraesCS3A02G438900	C5	C5.enrich	TraesCS4B02G122100	C6	C6.enrich	NAC	ERF
TraesCS3A02G438900	C5	C5.enrich	TraesCS5A02G424600	C6	C6.enrich	NAC	ERF
TraesCS3A02G438900	C5	C5.enrich	TraesCS7A02G145800	C6	C6.enrich	NAC	ERF
TraesCS3A02G438900	C5	C5.enrich	TraesCS4D02G267500	C6	C6.enrich	NAC	ERF
TraesCS3B02G120500	C5	C5.enrich	TraesCS2D02G286300	C6	C6.enrich	bHLH	ERF
TraesCS3B02G120500	C5	C5.enrich	TraesCS3A02G149000	C6	C6.enrich	bHLH	ERF
TraesCS3B02G120500	C5	C5.enrich	TraesCS6B02G280800	C6	C6.enrich	bHLH	ERF
TraesCS3B02G120500	C5	C5.enrich	TraesCS7A02G145800	C6	C6.enrich	bHLH	ERF
TraesCS3B02G120500	C5	C5.enrich	TraesCS3D02G157100	C6	C6.enrich	bHLH	ERF
TraesCS3B02G120500	C5	C5.enrich	TraesCS4A02G193100	C6	C6.enrich	bHLH	ERF
TraesCS3B02G120500	C5	C5.enrich	TraesCS4B02G122100	C6	C6.enrich	bHLH	ERF
TraesCS3B02G126200	C5	C5.enrich	TraesCS2D02G286300	C6	C6.enrich	NAC	ERF
TraesCS3B02G126200	C5	C5.enrich	TraesCS6D02G049300	C6	C6.enrich	NAC	C2H2
TraesCS3B02G126200	C5	C5.enrich	TraesCS4D02G120200	C6	C6.enrich	NAC	ERF
TraesCS3B02G126200	C5	C5.enrich	TraesCS4A02G193100	C6	C6.enrich	NAC	ERF
TraesCS3B02G126200	C5	C5.enrich	TraesCS4B02G122100	C6	C6.enrich	NAC	ERF
TraesCS3B02G126200	C5	C5.enrich	TraesCS5A02G424600	C6	C6.enrich	NAC	ERF
TraesCS3B02G126200	C5	C5.enrich	TraesCS7A02G145800	C6	C6.enrich	NAC	ERF
TraesCS3B02G126200	C5	C5.enrich	TraesCS4D02G267500	C6	C6.enrich	NAC	ERF
TraesCS3B02G190100	C5	C5.enrich	TraesCS3B02G505100	C6	C6.enrich	ARF	B3
TraesCS3B02G190100	C5	C5.enrich	TraesCS4D02G267500	C6	C6.enrich	ARF	ERF
TraesCS3B02G190100	C5	C5.enrich	TraesCS4D02G120200	C6	C6.enrich	ARF	ERF
TraesCS3B02G290600	C5	C5.enrich	TraesCS4B02G122100	C6	C6.enrich	MYB	ERF
TraesCS3B02G290600	C5	C5.enrich	TraesCS5B02G426600	C6	C6.enrich	MYB	ERF
TraesCS3B02G290600	C5	C5.enrich	TraesCS3A02G149000	C6	C6.enrich	MYB	ERF
TraesCS3B02G290600	C5	C5.enrich	TraesCS6D02G225700	C6	C6.enrich	MYB	ERF
TraesCS3B02G290600	C5	C5.enrich	TraesCS6B02G280800	C6	C6.enrich	MYB	ERF
TraesCS3B02G290600	C5	C5.enrich	TraesCS6D02G281200	C6	C6.enrich	MYB	ERF
TraesCS3B02G290600	C5	C5.enrich	TraesCS7A02G145800	C6	C6.enrich	MYB	ERF
TraesCS3B02G290600	C5	C5.enrich	TraesCS4D02G120200	C6	C6.enrich	MYB	ERF
TraesCS3B02G290600	C5	C5.enrich	TraesCS1D02G055600	C6	C6.enrich	MYB	C2H2
TraesCS3B02G367500	C5	C5.enrich	TraesCS4B02G122100	C6	C6.enrich	MYB	ERF
TraesCS3B02G367500	C5	C5.enrich	TraesCS5B02G426600	C6	C6.enrich	MYB	ERF
TraesCS3B02G367500	C5	C5.enrich	TraesCS3A02G149000	C6	C6.enrich	MYB	ERF
TraesCS3B02G367500	C5	C5.enrich	TraesCS6D02G225700	C6	C6.enrich	MYB	ERF
TraesCS3B02G367500	C5	C5.enrich	TraesCS6B02G280800	C6	C6.enrich	MYB	ERF
TraesCS3B02G367500	C5	C5.enrich	TraesCS6D02G281200	C6	C6.enrich	MYB	ERF
TraesCS3B02G367500	C5	C5.enrich	TraesCS7A02G145800	C6	C6.enrich	MYB	ERF
TraesCS3B02G367500	C5	C5.enrich	TraesCS4D02G120200	C6	C6.enrich	MYB	ERF
TraesCS3B02G367500	C5	C5.enrich	TraesCS1D02G055600	C6	C6.enrich	MYB	C2H2
TraesCS3B02G373800	C5	C5.enrich	TraesCS6D02G281200	C6	C6.enrich	WOX	ERF
TraesCS3B02G397100	C5	C5.enrich	TraesCS4B02G122100	C6	C6.enrich	MYB	ERF
TraesCS3B02G397100	C5	C5.enrich	TraesCS5B02G426600	C6	C6.enrich	MYB	ERF
TraesCS3B02G397100	C5	C5.enrich	TraesCS3A02G149000	C6	C6.enrich	MYB	ERF
TraesCS3B02G397100	C5	C5.enrich	TraesCS6D02G225700	C6	C6.enrich	MYB	ERF
TraesCS3B02G397100	C5	C5.enrich	TraesCS6B02G280800	C6	C6.enrich	MYB	ERF
TraesCS3B02G397100	C5	C5.enrich	TraesCS6D02G281200	C6	C6.enrich	MYB	ERF
TraesCS3B02G397100	C5	C5.enrich	TraesCS7A02G145800	C6	C6.enrich	MYB	ERF
TraesCS3B02G397100	C5	C5.enrich	TraesCS4D02G120200	C6	C6.enrich	MYB	ERF
TraesCS3B02G397100	C5	C5.enrich	TraesCS1D02G055600	C6	C6.enrich	MYB	C2H2
TraesCS3B02G404000	C5	C5.enrich	TraesCS2D02G286300	C6	C6.enrich	C2H2	ERF
TraesCS3B02G404000	C5	C5.enrich	TraesCS3B02G505100	C6	C6.enrich	C2H2	B3
TraesCS3B02G404000	C5	C5.enrich	TraesCS4D02G120200	C6	C6.enrich	C2H2	ERF
TraesCS3B02G404000	C5	C5.enrich	TraesCS7A02G145800	C6	C6.enrich	C2H2	ERF
TraesCS3B02G404600	C5	C5.enrich	TraesCS4D02G267500	C6	C6.enrich	bZIP	ERF
TraesCS3B02G404600	C5	C5.enrich	TraesCS5B02G426600	C6	C6.enrich	bZIP	ERF
TraesCS3B02G404600	C5	C5.enrich	TraesCS6D02G281200	C6	C6.enrich	bZIP	ERF
TraesCS3B02G404600	C5	C5.enrich	TraesCS3B02G505100	C6	C6.enrich	bZIP	B3
TraesCS3B02G412500	C5	C5.enrich	TraesCS1B02G071700	C6	C6.enrich	ERF	C2H2
TraesCS3B02G412500	C5	C5.enrich	TraesCS1D02G055600	C6	C6.enrich	ERF	C2H2
TraesCS3B02G412500	C5	C5.enrich	TraesCS4B02G101400	C6	C6.enrich	ERF	B3
TraesCS3B02G412500	C5	C5.enrich	TraesCS4B02G122100	C6	C6.enrich	ERF	ERF
TraesCS3B02G412500	C5	C5.enrich	TraesCS4D02G120200	C6	C6.enrich	ERF	ERF
TraesCS3B02G412500	C5	C5.enrich	TraesCS4D02G267500	C6	C6.enrich	ERF	ERF
TraesCS3B02G412500	C5	C5.enrich	TraesCS6B02G280800	C6	C6.enrich	ERF	ERF
TraesCS3B02G412500	C5	C5.enrich	TraesCS5A02G424600	C6	C6.enrich	ERF	ERF
TraesCS3B02G412500	C5	C5.enrich	TraesCS6D02G281200	C6	C6.enrich	ERF	ERF
TraesCS3B02G412500	C5	C5.enrich	TraesCS6D02G225700	C6	C6.enrich	ERF	ERF
TraesCS3B02G412500	C5	C5.enrich	TraesCS6A02G243500	C6	C6.enrich	ERF	ERF
TraesCS3B02G412500	C5	C5.enrich	TraesCS7A02G145800	C6	C6.enrich	ERF	ERF
TraesCS3B02G412500	C5	C5.enrich	TraesCS4B02G268100	C6	C6.enrich	ERF	ERF
TraesCS3B02G436900	C5	C5.enrich	TraesCS2D02G286300	C6	C6.enrich	NAC	ERF
TraesCS3B02G436900	C5	C5.enrich	TraesCS6D02G049300	C6	C6.enrich	NAC	C2H2
TraesCS3B02G436900	C5	C5.enrich	TraesCS4D02G120200	C6	C6.enrich	NAC	ERF
TraesCS3B02G436900	C5	C5.enrich	TraesCS4A02G193100	C6	C6.enrich	NAC	ERF
TraesCS3B02G436900	C5	C5.enrich	TraesCS4B02G122100	C6	C6.enrich	NAC	ERF
TraesCS3B02G436900	C5	C5.enrich	TraesCS5A02G424600	C6	C6.enrich	NAC	ERF
TraesCS3B02G436900	C5	C5.enrich	TraesCS7A02G145800	C6	C6.enrich	NAC	ERF
TraesCS3B02G436900	C5	C5.enrich	TraesCS4D02G267500	C6	C6.enrich	NAC	ERF
TraesCS3B02G472800	C5	C5.enrich	TraesCS2D02G286300	C6	C6.enrich	NAC	ERF
TraesCS3B02G472800	C5	C5.enrich	TraesCS6D02G049300	C6	C6.enrich	NAC	C2H2
TraesCS3B02G472800	C5	C5.enrich	TraesCS4D02G120200	C6	C6.enrich	NAC	ERF
TraesCS3B02G472800	C5	C5.enrich	TraesCS4A02G193100	C6	C6.enrich	NAC	ERF
TraesCS3B02G472800	C5	C5.enrich	TraesCS4B02G122100	C6	C6.enrich	NAC	ERF
TraesCS3B02G472800	C5	C5.enrich	TraesCS5A02G424600	C6	C6.enrich	NAC	ERF
TraesCS3B02G472800	C5	C5.enrich	TraesCS7A02G145800	C6	C6.enrich	NAC	ERF
TraesCS3B02G472800	C5	C5.enrich	TraesCS4D02G267500	C6	C6.enrich	NAC	ERF
TraesCS3D02G036200	C5	C5.enrich	TraesCS4B02G122100	C6	C6.enrich	MYB	ERF
TraesCS3D02G036200	C5	C5.enrich	TraesCS5B02G426600	C6	C6.enrich	MYB	ERF
TraesCS3D02G036200	C5	C5.enrich	TraesCS3A02G149000	C6	C6.enrich	MYB	ERF
TraesCS3D02G036200	C5	C5.enrich	TraesCS6D02G225700	C6	C6.enrich	MYB	ERF
TraesCS3D02G036200	C5	C5.enrich	TraesCS6B02G280800	C6	C6.enrich	MYB	ERF
TraesCS3D02G036200	C5	C5.enrich	TraesCS6D02G281200	C6	C6.enrich	MYB	ERF
TraesCS3D02G036200	C5	C5.enrich	TraesCS7A02G145800	C6	C6.enrich	MYB	ERF
TraesCS3D02G036200	C5	C5.enrich	TraesCS4D02G120200	C6	C6.enrich	MYB	ERF
TraesCS3D02G036200	C5	C5.enrich	TraesCS1D02G055600	C6	C6.enrich	MYB	C2H2
TraesCS3D02G105100	C5	C5.enrich	TraesCS2D02G286300	C6	C6.enrich	bHLH	ERF
TraesCS3D02G105100	C5	C5.enrich	TraesCS3A02G149000	C6	C6.enrich	bHLH	ERF
TraesCS3D02G105100	C5	C5.enrich	TraesCS6B02G280800	C6	C6.enrich	bHLH	ERF
TraesCS3D02G105100	C5	C5.enrich	TraesCS7A02G145800	C6	C6.enrich	bHLH	ERF
TraesCS3D02G105100	C5	C5.enrich	TraesCS3D02G157100	C6	C6.enrich	bHLH	ERF
TraesCS3D02G105100	C5	C5.enrich	TraesCS4A02G193100	C6	C6.enrich	bHLH	ERF
TraesCS3D02G105100	C5	C5.enrich	TraesCS4B02G122100	C6	C6.enrich	bHLH	ERF
TraesCS3D02G109400	C5	C5.enrich	TraesCS2D02G286300	C6	C6.enrich	NAC	ERF
TraesCS3D02G109400	C5	C5.enrich	TraesCS6D02G049300	C6	C6.enrich	NAC	C2H2
TraesCS3D02G109400	C5	C5.enrich	TraesCS4D02G120200	C6	C6.enrich	NAC	ERF
TraesCS3D02G109400	C5	C5.enrich	TraesCS4A02G193100	C6	C6.enrich	NAC	ERF
TraesCS3D02G109400	C5	C5.enrich	TraesCS4B02G122100	C6	C6.enrich	NAC	ERF
TraesCS3D02G109400	C5	C5.enrich	TraesCS5A02G424600	C6	C6.enrich	NAC	ERF
TraesCS3D02G109400	C5	C5.enrich	TraesCS7A02G145800	C6	C6.enrich	NAC	ERF
TraesCS3D02G109400	C5	C5.enrich	TraesCS4D02G267500	C6	C6.enrich	NAC	ERF
TraesCS3D02G329400	C5	C5.enrich	TraesCS4B02G122100	C6	C6.enrich	MYB	ERF
TraesCS3D02G329400	C5	C5.enrich	TraesCS5B02G426600	C6	C6.enrich	MYB	ERF
TraesCS3D02G329400	C5	C5.enrich	TraesCS3A02G149000	C6	C6.enrich	MYB	ERF
TraesCS3D02G329400	C5	C5.enrich	TraesCS6D02G225700	C6	C6.enrich	MYB	ERF
TraesCS3D02G329400	C5	C5.enrich	TraesCS6B02G280800	C6	C6.enrich	MYB	ERF
TraesCS3D02G329400	C5	C5.enrich	TraesCS6D02G281200	C6	C6.enrich	MYB	ERF
TraesCS3D02G329400	C5	C5.enrich	TraesCS7A02G145800	C6	C6.enrich	MYB	ERF
TraesCS3D02G329400	C5	C5.enrich	TraesCS4D02G120200	C6	C6.enrich	MYB	ERF
TraesCS3D02G329400	C5	C5.enrich	TraesCS1D02G055600	C6	C6.enrich	MYB	C2H2
TraesCS3D02G335500	C5	C5.enrich	TraesCS6D02G281200	C6	C6.enrich	WOX	ERF
TraesCS3D02G364800	C5	C5.enrich	TraesCS2D02G286300	C6	C6.enrich	C2H2	ERF
TraesCS3D02G364800	C5	C5.enrich	TraesCS3B02G505100	C6	C6.enrich	C2H2	B3
TraesCS3D02G364800	C5	C5.enrich	TraesCS4D02G120200	C6	C6.enrich	C2H2	ERF
TraesCS3D02G364800	C5	C5.enrich	TraesCS7A02G145800	C6	C6.enrich	C2H2	ERF
TraesCS3D02G364900	C5	C5.enrich	TraesCS4D02G267500	C6	C6.enrich	bZIP	ERF
TraesCS3D02G364900	C5	C5.enrich	TraesCS5B02G426600	C6	C6.enrich	bZIP	ERF
TraesCS3D02G364900	C5	C5.enrich	TraesCS6D02G281200	C6	C6.enrich	bZIP	ERF
TraesCS3D02G364900	C5	C5.enrich	TraesCS3B02G505100	C6	C6.enrich	bZIP	B3
TraesCS3D02G431700	C5	C5.enrich	TraesCS2D02G286300	C6	C6.enrich	NAC	ERF
TraesCS3D02G431700	C5	C5.enrich	TraesCS6D02G049300	C6	C6.enrich	NAC	C2H2
TraesCS3D02G431700	C5	C5.enrich	TraesCS4D02G120200	C6	C6.enrich	NAC	ERF
TraesCS3D02G431700	C5	C5.enrich	TraesCS4A02G193100	C6	C6.enrich	NAC	ERF
TraesCS3D02G431700	C5	C5.enrich	TraesCS4B02G122100	C6	C6.enrich	NAC	ERF
TraesCS3D02G431700	C5	C5.enrich	TraesCS5A02G424600	C6	C6.enrich	NAC	ERF
TraesCS3D02G431700	C5	C5.enrich	TraesCS7A02G145800	C6	C6.enrich	NAC	ERF
TraesCS3D02G431700	C5	C5.enrich	TraesCS4D02G267500	C6	C6.enrich	NAC	ERF
TraesCS3D02G455700	C5	C5.enrich	TraesCS7A02G145800	C6	C6.enrich	B3	ERF
TraesCS4A02G011600	C5	C5.enrich	TraesCS6D02G049300	C6	C6.enrich	AP2	C2H2
TraesCS4A02G011600	C5	C5.enrich	TraesCS2D02G286300	C6	C6.enrich	AP2	ERF
TraesCS4A02G011600	C5	C5.enrich	TraesCS6D02G225700	C6	C6.enrich	AP2	ERF
TraesCS4A02G011600	C5	C5.enrich	TraesCS6A02G243500	C6	C6.enrich	AP2	ERF
TraesCS4A02G059600	C5	C5.enrich	TraesCS2A02G288000	C6	C6.enrich	HD-ZIP	ERF
TraesCS4A02G059600	C5	C5.enrich	TraesCS2D02G286300	C6	C6.enrich	HD-ZIP	ERF
TraesCS4A02G059600	C5	C5.enrich	TraesCS7A02G145800	C6	C6.enrich	HD-ZIP	ERF
TraesCS4A02G059600	C5	C5.enrich	TraesCS6D02G281200	C6	C6.enrich	HD-ZIP	ERF
TraesCS4A02G059600	C5	C5.enrich	TraesCS6D02G225700	C6	C6.enrich	HD-ZIP	ERF
TraesCS4A02G088400	C5	C5.enrich	TraesCS1B02G071700	C6	C6.enrich	ERF	C2H2
TraesCS4A02G088400	C5	C5.enrich	TraesCS1D02G055600	C6	C6.enrich	ERF	C2H2
TraesCS4A02G088400	C5	C5.enrich	TraesCS4B02G101400	C6	C6.enrich	ERF	B3
TraesCS4A02G088400	C5	C5.enrich	TraesCS4B02G122100	C6	C6.enrich	ERF	ERF
TraesCS4A02G088400	C5	C5.enrich	TraesCS4D02G120200	C6	C6.enrich	ERF	ERF
TraesCS4A02G088400	C5	C5.enrich	TraesCS4D02G267500	C6	C6.enrich	ERF	ERF
TraesCS4A02G088400	C5	C5.enrich	TraesCS6B02G280800	C6	C6.enrich	ERF	ERF
TraesCS4A02G088400	C5	C5.enrich	TraesCS5A02G424600	C6	C6.enrich	ERF	ERF
TraesCS4A02G088400	C5	C5.enrich	TraesCS6D02G281200	C6	C6.enrich	ERF	ERF
TraesCS4A02G088400	C5	C5.enrich	TraesCS6D02G225700	C6	C6.enrich	ERF	ERF
TraesCS4A02G088400	C5	C5.enrich	TraesCS6A02G243500	C6	C6.enrich	ERF	ERF
TraesCS4A02G088400	C5	C5.enrich	TraesCS7A02G145800	C6	C6.enrich	ERF	ERF
TraesCS4A02G088400	C5	C5.enrich	TraesCS4B02G268100	C6	C6.enrich	ERF	ERF
TraesCS4A02G214700	C5	C5.enrich	TraesCS7A02G145800	C6	C6.enrich	B3	ERF
TraesCS4A02G214700	C5	C5.enrich	TraesCS2D02G286300	C6	C6.enrich	B3	ERF
TraesCS4A02G219700	C5	C5.enrich	TraesCS2D02G286300	C6	C6.enrich	NAC	ERF
TraesCS4A02G219700	C5	C5.enrich	TraesCS6D02G049300	C6	C6.enrich	NAC	C2H2
TraesCS4A02G219700	C5	C5.enrich	TraesCS4D02G120200	C6	C6.enrich	NAC	ERF
TraesCS4A02G219700	C5	C5.enrich	TraesCS4A02G193100	C6	C6.enrich	NAC	ERF
TraesCS4A02G219700	C5	C5.enrich	TraesCS4B02G122100	C6	C6.enrich	NAC	ERF
TraesCS4A02G219700	C5	C5.enrich	TraesCS5A02G424600	C6	C6.enrich	NAC	ERF
TraesCS4A02G219700	C5	C5.enrich	TraesCS7A02G145800	C6	C6.enrich	NAC	ERF
TraesCS4A02G219700	C5	C5.enrich	TraesCS4D02G267500	C6	C6.enrich	NAC	ERF
TraesCS4A02G352700	C5	C5.enrich	TraesCS2D02G286300	C6	C6.enrich	C2H2	ERF
TraesCS4A02G352700	C5	C5.enrich	TraesCS3B02G505100	C6	C6.enrich	C2H2	B3
TraesCS4A02G352700	C5	C5.enrich	TraesCS4D02G120200	C6	C6.enrich	C2H2	ERF
TraesCS4A02G352700	C5	C5.enrich	TraesCS7A02G145800	C6	C6.enrich	C2H2	ERF
TraesCS4A02G405800	C5	C5.enrich	TraesCS2A02G288000	C6	C6.enrich	HD-ZIP	ERF
TraesCS4A02G405800	C5	C5.enrich	TraesCS2D02G286300	C6	C6.enrich	HD-ZIP	ERF
TraesCS4A02G405800	C5	C5.enrich	TraesCS7A02G145800	C6	C6.enrich	HD-ZIP	ERF
TraesCS4A02G405800	C5	C5.enrich	TraesCS6D02G281200	C6	C6.enrich	HD-ZIP	ERF
TraesCS4A02G405800	C5	C5.enrich	TraesCS6D02G225700	C6	C6.enrich	HD-ZIP	ERF
TraesCS4B02G262400	C5	C5.enrich	TraesCS2D02G286300	C6	C6.enrich	C2H2	ERF
TraesCS4B02G262400	C5	C5.enrich	TraesCS3B02G505100	C6	C6.enrich	C2H2	B3
TraesCS4B02G262400	C5	C5.enrich	TraesCS4D02G120200	C6	C6.enrich	C2H2	ERF
TraesCS4B02G262400	C5	C5.enrich	TraesCS7A02G145800	C6	C6.enrich	C2H2	ERF
TraesCS4B02G292900	C5	C5.enrich	TraesCS6D02G049300	C6	C6.enrich	AP2	C2H2
TraesCS4B02G292900	C5	C5.enrich	TraesCS6A02G243500	C6	C6.enrich	AP2	ERF
TraesCS4B02G305300	C5	C5.enrich	TraesCS2A02G288000	C6	C6.enrich	HD-ZIP	ERF
TraesCS4B02G305300	C5	C5.enrich	TraesCS2D02G286300	C6	C6.enrich	HD-ZIP	ERF
TraesCS4B02G305300	C5	C5.enrich	TraesCS7A02G145800	C6	C6.enrich	HD-ZIP	ERF
TraesCS4B02G305300	C5	C5.enrich	TraesCS6D02G281200	C6	C6.enrich	HD-ZIP	ERF
TraesCS4B02G305300	C5	C5.enrich	TraesCS6D02G225700	C6	C6.enrich	HD-ZIP	ERF
TraesCS4B02G320300	C5	C5.enrich	TraesCS2D02G286300	C6	C6.enrich	NAC	ERF
TraesCS4B02G320300	C5	C5.enrich	TraesCS6D02G049300	C6	C6.enrich	NAC	C2H2
TraesCS4B02G320300	C5	C5.enrich	TraesCS4D02G120200	C6	C6.enrich	NAC	ERF
TraesCS4B02G320300	C5	C5.enrich	TraesCS4A02G193100	C6	C6.enrich	NAC	ERF
TraesCS4B02G320300	C5	C5.enrich	TraesCS4B02G122100	C6	C6.enrich	NAC	ERF
TraesCS4B02G320300	C5	C5.enrich	TraesCS5A02G424600	C6	C6.enrich	NAC	ERF
TraesCS4B02G320300	C5	C5.enrich	TraesCS7A02G145800	C6	C6.enrich	NAC	ERF
TraesCS4B02G320300	C5	C5.enrich	TraesCS4D02G267500	C6	C6.enrich	NAC	ERF
TraesCS4B02G350600	C5	C5.enrich	TraesCS2D02G286300	C6	C6.enrich	NAC	ERF
TraesCS4B02G350600	C5	C5.enrich	TraesCS6D02G049300	C6	C6.enrich	NAC	C2H2
TraesCS4B02G350600	C5	C5.enrich	TraesCS4D02G120200	C6	C6.enrich	NAC	ERF
TraesCS4B02G350600	C5	C5.enrich	TraesCS4A02G193100	C6	C6.enrich	NAC	ERF
TraesCS4B02G350600	C5	C5.enrich	TraesCS4B02G122100	C6	C6.enrich	NAC	ERF
TraesCS4B02G350600	C5	C5.enrich	TraesCS5A02G424600	C6	C6.enrich	NAC	ERF
TraesCS4B02G350600	C5	C5.enrich	TraesCS7A02G145800	C6	C6.enrich	NAC	ERF
TraesCS4B02G350600	C5	C5.enrich	TraesCS4D02G267500	C6	C6.enrich	NAC	ERF
TraesCS4D02G077500	C5	C5.enrich	TraesCS1B02G071700	C6	C6.enrich	ERF	C2H2
TraesCS4D02G077500	C5	C5.enrich	TraesCS1D02G055600	C6	C6.enrich	ERF	C2H2
TraesCS4D02G077500	C5	C5.enrich	TraesCS4B02G101400	C6	C6.enrich	ERF	B3
TraesCS4D02G077500	C5	C5.enrich	TraesCS4B02G122100	C6	C6.enrich	ERF	ERF
TraesCS4D02G077500	C5	C5.enrich	TraesCS4D02G120200	C6	C6.enrich	ERF	ERF
TraesCS4D02G077500	C5	C5.enrich	TraesCS4D02G267500	C6	C6.enrich	ERF	ERF
TraesCS4D02G077500	C5	C5.enrich	TraesCS6B02G280800	C6	C6.enrich	ERF	ERF
TraesCS4D02G077500	C5	C5.enrich	TraesCS5A02G424600	C6	C6.enrich	ERF	ERF
TraesCS4D02G077500	C5	C5.enrich	TraesCS6D02G281200	C6	C6.enrich	ERF	ERF
TraesCS4D02G077500	C5	C5.enrich	TraesCS6D02G225700	C6	C6.enrich	ERF	ERF
TraesCS4D02G077500	C5	C5.enrich	TraesCS6A02G243500	C6	C6.enrich	ERF	ERF
TraesCS4D02G077500	C5	C5.enrich	TraesCS7A02G145800	C6	C6.enrich	ERF	ERF
TraesCS4D02G077500	C5	C5.enrich	TraesCS4B02G268100	C6	C6.enrich	ERF	ERF
TraesCS4D02G094400	C5	C5.enrich	TraesCS2D02G286300	C6	C6.enrich	NAC	ERF
TraesCS4D02G094400	C5	C5.enrich	TraesCS6D02G049300	C6	C6.enrich	NAC	C2H2
TraesCS4D02G094400	C5	C5.enrich	TraesCS4D02G120200	C6	C6.enrich	NAC	ERF
TraesCS4D02G094400	C5	C5.enrich	TraesCS4A02G193100	C6	C6.enrich	NAC	ERF
TraesCS4D02G094400	C5	C5.enrich	TraesCS4B02G122100	C6	C6.enrich	NAC	ERF
TraesCS4D02G094400	C5	C5.enrich	TraesCS5A02G424600	C6	C6.enrich	NAC	ERF
TraesCS4D02G094400	C5	C5.enrich	TraesCS7A02G145800	C6	C6.enrich	NAC	ERF
TraesCS4D02G094400	C5	C5.enrich	TraesCS4D02G267500	C6	C6.enrich	NAC	ERF
TraesCS4D02G115200	C5	C5.enrich	TraesCS3B02G505100	C6	C6.enrich	bZIP	B3
TraesCS4D02G236600	C5	C5.enrich	TraesCS2A02G288000	C6	C6.enrich	HD-ZIP	ERF
TraesCS4D02G236600	C5	C5.enrich	TraesCS2D02G286300	C6	C6.enrich	HD-ZIP	ERF
TraesCS4D02G236600	C5	C5.enrich	TraesCS7A02G145800	C6	C6.enrich	HD-ZIP	ERF
TraesCS4D02G236600	C5	C5.enrich	TraesCS6D02G281200	C6	C6.enrich	HD-ZIP	ERF
TraesCS4D02G236600	C5	C5.enrich	TraesCS6D02G225700	C6	C6.enrich	HD-ZIP	ERF
TraesCS4D02G285100	C5	C5.enrich	TraesCS6B02G280800	C6	C6.enrich	Dof	ERF
TraesCS4D02G285100	C5	C5.enrich	TraesCS6D02G281200	C6	C6.enrich	Dof	ERF
TraesCS4D02G316800	C5	C5.enrich	TraesCS2D02G286300	C6	C6.enrich	NAC	ERF
TraesCS4D02G316800	C5	C5.enrich	TraesCS6D02G049300	C6	C6.enrich	NAC	C2H2
TraesCS4D02G316800	C5	C5.enrich	TraesCS4D02G120200	C6	C6.enrich	NAC	ERF
TraesCS4D02G316800	C5	C5.enrich	TraesCS4A02G193100	C6	C6.enrich	NAC	ERF
TraesCS4D02G316800	C5	C5.enrich	TraesCS4B02G122100	C6	C6.enrich	NAC	ERF
TraesCS4D02G316800	C5	C5.enrich	TraesCS5A02G424600	C6	C6.enrich	NAC	ERF
TraesCS4D02G316800	C5	C5.enrich	TraesCS7A02G145800	C6	C6.enrich	NAC	ERF
TraesCS4D02G316800	C5	C5.enrich	TraesCS4D02G267500	C6	C6.enrich	NAC	ERF
TraesCS4D02G345300	C5	C5.enrich	TraesCS2D02G286300	C6	C6.enrich	NAC	ERF
TraesCS4D02G345300	C5	C5.enrich	TraesCS6D02G049300	C6	C6.enrich	NAC	C2H2
TraesCS4D02G345300	C5	C5.enrich	TraesCS4D02G120200	C6	C6.enrich	NAC	ERF
TraesCS4D02G345300	C5	C5.enrich	TraesCS4A02G193100	C6	C6.enrich	NAC	ERF
TraesCS4D02G345300	C5	C5.enrich	TraesCS4B02G122100	C6	C6.enrich	NAC	ERF
TraesCS4D02G345300	C5	C5.enrich	TraesCS5A02G424600	C6	C6.enrich	NAC	ERF
TraesCS4D02G345300	C5	C5.enrich	TraesCS7A02G145800	C6	C6.enrich	NAC	ERF
TraesCS4D02G345300	C5	C5.enrich	TraesCS4D02G267500	C6	C6.enrich	NAC	ERF
TraesCS5A02G087100	C5	C5.enrich	TraesCS4B02G122100	C6	C6.enrich	MYB	ERF
TraesCS5A02G087100	C5	C5.enrich	TraesCS5B02G426600	C6	C6.enrich	MYB	ERF
TraesCS5A02G087100	C5	C5.enrich	TraesCS3A02G149000	C6	C6.enrich	MYB	ERF
TraesCS5A02G087100	C5	C5.enrich	TraesCS6D02G225700	C6	C6.enrich	MYB	ERF
TraesCS5A02G087100	C5	C5.enrich	TraesCS6B02G280800	C6	C6.enrich	MYB	ERF
TraesCS5A02G087100	C5	C5.enrich	TraesCS6D02G281200	C6	C6.enrich	MYB	ERF
TraesCS5A02G087100	C5	C5.enrich	TraesCS7A02G145800	C6	C6.enrich	MYB	ERF
TraesCS5A02G087100	C5	C5.enrich	TraesCS4D02G120200	C6	C6.enrich	MYB	ERF
TraesCS5A02G087100	C5	C5.enrich	TraesCS1D02G055600	C6	C6.enrich	MYB	C2H2
TraesCS5A02G126600	C5	C5.enrich	TraesCS3B02G505100	C6	C6.enrich	bZIP	B3
TraesCS5A02G127100	C5	C5.enrich	TraesCS5B02G426600	C6	C6.enrich	B3	ERF
TraesCS5A02G127100	C5	C5.enrich	TraesCS6D02G225700	C6	C6.enrich	B3	ERF
TraesCS5A02G141700	C5	C5.enrich	TraesCS6D02G049300	C6	C6.enrich	AP2	C2H2
TraesCS5A02G141700	C5	C5.enrich	TraesCS2D02G286300	C6	C6.enrich	AP2	ERF
TraesCS5A02G141700	C5	C5.enrich	TraesCS6D02G225700	C6	C6.enrich	AP2	ERF
TraesCS5A02G141700	C5	C5.enrich	TraesCS6A02G243500	C6	C6.enrich	AP2	ERF
TraesCS5A02G179000	C5	C5.enrich	TraesCS3B02G505100	C6	C6.enrich	bZIP	B3
TraesCS5A02G179000	C5	C5.enrich	TraesCS6D02G225700	C6	C6.enrich	bZIP	ERF
TraesCS5A02G179000	C5	C5.enrich	TraesCS3A02G149000	C6	C6.enrich	bZIP	ERF
TraesCS5A02G179000	C5	C5.enrich	TraesCS3D02G157100	C6	C6.enrich	bZIP	ERF
TraesCS5A02G179000	C5	C5.enrich	TraesCS4A02G193100	C6	C6.enrich	bZIP	ERF
TraesCS5A02G179000	C5	C5.enrich	TraesCS4B02G122100	C6	C6.enrich	bZIP	ERF
TraesCS5A02G180800	C5	C5.enrich	TraesCS1B02G071700	C6	C6.enrich	ERF	C2H2
TraesCS5A02G180800	C5	C5.enrich	TraesCS1D02G055600	C6	C6.enrich	ERF	C2H2
TraesCS5A02G180800	C5	C5.enrich	TraesCS4B02G101400	C6	C6.enrich	ERF	B3
TraesCS5A02G180800	C5	C5.enrich	TraesCS4B02G122100	C6	C6.enrich	ERF	ERF
TraesCS5A02G180800	C5	C5.enrich	TraesCS4D02G120200	C6	C6.enrich	ERF	ERF
TraesCS5A02G180800	C5	C5.enrich	TraesCS4D02G267500	C6	C6.enrich	ERF	ERF
TraesCS5A02G180800	C5	C5.enrich	TraesCS5A02G424600	C6	C6.enrich	ERF	ERF
TraesCS5A02G180800	C5	C5.enrich	TraesCS6B02G280800	C6	C6.enrich	ERF	ERF
TraesCS5A02G180800	C5	C5.enrich	TraesCS6D02G281200	C6	C6.enrich	ERF	ERF
TraesCS5A02G180800	C5	C5.enrich	TraesCS6D02G225700	C6	C6.enrich	ERF	ERF
TraesCS5A02G180800	C5	C5.enrich	TraesCS6A02G243500	C6	C6.enrich	ERF	ERF
TraesCS5A02G180800	C5	C5.enrich	TraesCS7A02G145800	C6	C6.enrich	ERF	ERF
TraesCS5A02G180800	C5	C5.enrich	TraesCS4B02G268100	C6	C6.enrich	ERF	ERF
TraesCS5A02G248200	C5	C5.enrich	TraesCS2D02G286300	C6	C6.enrich	bHLH	ERF
TraesCS5A02G251800	C5	C5.enrich	TraesCS6B02G280800	C6	C6.enrich	Dof	ERF
TraesCS5A02G251800	C5	C5.enrich	TraesCS6D02G281200	C6	C6.enrich	Dof	ERF
TraesCS5A02G310500	C5	C5.enrich	TraesCS1B02G071700	C6	C6.enrich	ERF	C2H2
TraesCS5A02G310500	C5	C5.enrich	TraesCS1D02G055600	C6	C6.enrich	ERF	C2H2
TraesCS5A02G310500	C5	C5.enrich	TraesCS4B02G101400	C6	C6.enrich	ERF	B3
TraesCS5A02G310500	C5	C5.enrich	TraesCS4B02G122100	C6	C6.enrich	ERF	ERF
TraesCS5A02G310500	C5	C5.enrich	TraesCS4D02G120200	C6	C6.enrich	ERF	ERF
TraesCS5A02G310500	C5	C5.enrich	TraesCS4D02G267500	C6	C6.enrich	ERF	ERF
TraesCS5A02G310500	C5	C5.enrich	TraesCS6B02G280800	C6	C6.enrich	ERF	ERF
TraesCS5A02G310500	C5	C5.enrich	TraesCS5A02G424600	C6	C6.enrich	ERF	ERF
TraesCS5A02G310500	C5	C5.enrich	TraesCS6D02G281200	C6	C6.enrich	ERF	ERF
TraesCS5A02G310500	C5	C5.enrich	TraesCS6D02G225700	C6	C6.enrich	ERF	ERF
TraesCS5A02G310500	C5	C5.enrich	TraesCS6A02G243500	C6	C6.enrich	ERF	ERF
TraesCS5A02G310500	C5	C5.enrich	TraesCS7A02G145800	C6	C6.enrich	ERF	ERF
TraesCS5A02G310500	C5	C5.enrich	TraesCS4B02G268100	C6	C6.enrich	ERF	ERF
TraesCS5A02G401600	C5	C5.enrich	TraesCS6B02G280800	C6	C6.enrich	G2-like	ERF
TraesCS5A02G401600	C5	C5.enrich	TraesCS5A02G424600	C6	C6.enrich	G2-like	ERF
TraesCS5A02G423900	C5	C5.enrich	TraesCS5A02G424600	C6	C6.enrich	TCP	ERF
TraesCS5A02G423900	C5	C5.enrich	TraesCS4D02G120200	C6	C6.enrich	TCP	ERF
TraesCS5A02G423900	C5	C5.enrich	TraesCS4A02G193100	C6	C6.enrich	TCP	ERF
TraesCS5A02G479400	C5	C5.enrich	TraesCS6B02G280800	C6	C6.enrich	Dof	ERF
TraesCS5A02G479400	C5	C5.enrich	TraesCS6D02G281200	C6	C6.enrich	Dof	ERF
TraesCS5A02G491700	C5	C5.enrich	TraesCS2D02G286300	C6	C6.enrich	NAC	ERF
TraesCS5A02G491700	C5	C5.enrich	TraesCS6D02G049300	C6	C6.enrich	NAC	C2H2
TraesCS5A02G491700	C5	C5.enrich	TraesCS4D02G120200	C6	C6.enrich	NAC	ERF
TraesCS5A02G491700	C5	C5.enrich	TraesCS4A02G193100	C6	C6.enrich	NAC	ERF
TraesCS5A02G491700	C5	C5.enrich	TraesCS4B02G122100	C6	C6.enrich	NAC	ERF
TraesCS5A02G491700	C5	C5.enrich	TraesCS5A02G424600	C6	C6.enrich	NAC	ERF
TraesCS5A02G491700	C5	C5.enrich	TraesCS7A02G145800	C6	C6.enrich	NAC	ERF
TraesCS5A02G491700	C5	C5.enrich	TraesCS4D02G267500	C6	C6.enrich	NAC	ERF
TraesCS5A02G516600	C5	C5.enrich	TraesCS5B02G426600	C6	C6.enrich	B3	ERF
TraesCS5A02G516600	C5	C5.enrich	TraesCS6D02G225700	C6	C6.enrich	B3	ERF
TraesCS5B02G087600	C5	C5.enrich	TraesCS6B02G280800	C6	C6.enrich	Dof	ERF
TraesCS5B02G087600	C5	C5.enrich	TraesCS6D02G281200	C6	C6.enrich	Dof	ERF
TraesCS5B02G089200	C5	C5.enrich	TraesCS4B02G122100	C6	C6.enrich	MYB	ERF
TraesCS5B02G089200	C5	C5.enrich	TraesCS5B02G426600	C6	C6.enrich	MYB	ERF
TraesCS5B02G089200	C5	C5.enrich	TraesCS3A02G149000	C6	C6.enrich	MYB	ERF
TraesCS5B02G089200	C5	C5.enrich	TraesCS6D02G225700	C6	C6.enrich	MYB	ERF
TraesCS5B02G089200	C5	C5.enrich	TraesCS6B02G280800	C6	C6.enrich	MYB	ERF
TraesCS5B02G089200	C5	C5.enrich	TraesCS6D02G281200	C6	C6.enrich	MYB	ERF
TraesCS5B02G089200	C5	C5.enrich	TraesCS7A02G145800	C6	C6.enrich	MYB	ERF
TraesCS5B02G089200	C5	C5.enrich	TraesCS4D02G120200	C6	C6.enrich	MYB	ERF
TraesCS5B02G089200	C5	C5.enrich	TraesCS1D02G055600	C6	C6.enrich	MYB	C2H2
TraesCS5B02G093000	C5	C5.enrich	TraesCS4B02G122100	C6	C6.enrich	MYB	ERF
TraesCS5B02G093000	C5	C5.enrich	TraesCS5B02G426600	C6	C6.enrich	MYB	ERF
TraesCS5B02G093000	C5	C5.enrich	TraesCS3A02G149000	C6	C6.enrich	MYB	ERF
TraesCS5B02G093000	C5	C5.enrich	TraesCS6D02G225700	C6	C6.enrich	MYB	ERF
TraesCS5B02G093000	C5	C5.enrich	TraesCS6B02G280800	C6	C6.enrich	MYB	ERF
TraesCS5B02G093000	C5	C5.enrich	TraesCS6D02G281200	C6	C6.enrich	MYB	ERF
TraesCS5B02G093000	C5	C5.enrich	TraesCS7A02G145800	C6	C6.enrich	MYB	ERF
TraesCS5B02G093000	C5	C5.enrich	TraesCS4D02G120200	C6	C6.enrich	MYB	ERF
TraesCS5B02G093000	C5	C5.enrich	TraesCS1D02G055600	C6	C6.enrich	MYB	C2H2
TraesCS5B02G094300	C5	C5.enrich	TraesCS3B02G505100	C6	C6.enrich	bZIP	B3
TraesCS5B02G094300	C5	C5.enrich	TraesCS6D02G225700	C6	C6.enrich	bZIP	ERF
TraesCS5B02G094300	C5	C5.enrich	TraesCS3A02G149000	C6	C6.enrich	bZIP	ERF
TraesCS5B02G094300	C5	C5.enrich	TraesCS3D02G157100	C6	C6.enrich	bZIP	ERF
TraesCS5B02G094300	C5	C5.enrich	TraesCS4A02G193100	C6	C6.enrich	bZIP	ERF
TraesCS5B02G094300	C5	C5.enrich	TraesCS4B02G122100	C6	C6.enrich	bZIP	ERF
TraesCS5B02G118200	C5	C5.enrich	TraesCS1B02G071700	C6	C6.enrich	ERF	C2H2
TraesCS5B02G118200	C5	C5.enrich	TraesCS1D02G055600	C6	C6.enrich	ERF	C2H2
TraesCS5B02G118200	C5	C5.enrich	TraesCS4B02G101400	C6	C6.enrich	ERF	B3
TraesCS5B02G118200	C5	C5.enrich	TraesCS4B02G122100	C6	C6.enrich	ERF	ERF
TraesCS5B02G118200	C5	C5.enrich	TraesCS4D02G120200	C6	C6.enrich	ERF	ERF
TraesCS5B02G118200	C5	C5.enrich	TraesCS4D02G267500	C6	C6.enrich	ERF	ERF
TraesCS5B02G118200	C5	C5.enrich	TraesCS6B02G280800	C6	C6.enrich	ERF	ERF
TraesCS5B02G118200	C5	C5.enrich	TraesCS5A02G424600	C6	C6.enrich	ERF	ERF
TraesCS5B02G118200	C5	C5.enrich	TraesCS6D02G281200	C6	C6.enrich	ERF	ERF
TraesCS5B02G118200	C5	C5.enrich	TraesCS6D02G225700	C6	C6.enrich	ERF	ERF
TraesCS5B02G118200	C5	C5.enrich	TraesCS6A02G243500	C6	C6.enrich	ERF	ERF
TraesCS5B02G118200	C5	C5.enrich	TraesCS7A02G145800	C6	C6.enrich	ERF	ERF
TraesCS5B02G118200	C5	C5.enrich	TraesCS4B02G268100	C6	C6.enrich	ERF	ERF
TraesCS5B02G178600	C5	C5.enrich	TraesCS1B02G071700	C6	C6.enrich	ERF	C2H2
TraesCS5B02G178600	C5	C5.enrich	TraesCS1D02G055600	C6	C6.enrich	ERF	C2H2
TraesCS5B02G178600	C5	C5.enrich	TraesCS4B02G101400	C6	C6.enrich	ERF	B3
TraesCS5B02G178600	C5	C5.enrich	TraesCS4B02G122100	C6	C6.enrich	ERF	ERF
TraesCS5B02G178600	C5	C5.enrich	TraesCS4D02G120200	C6	C6.enrich	ERF	ERF
TraesCS5B02G178600	C5	C5.enrich	TraesCS4D02G267500	C6	C6.enrich	ERF	ERF
TraesCS5B02G178600	C5	C5.enrich	TraesCS5A02G424600	C6	C6.enrich	ERF	ERF
TraesCS5B02G178600	C5	C5.enrich	TraesCS6B02G280800	C6	C6.enrich	ERF	ERF
TraesCS5B02G178600	C5	C5.enrich	TraesCS6D02G281200	C6	C6.enrich	ERF	ERF
TraesCS5B02G178600	C5	C5.enrich	TraesCS6D02G225700	C6	C6.enrich	ERF	ERF
TraesCS5B02G178600	C5	C5.enrich	TraesCS6A02G243500	C6	C6.enrich	ERF	ERF
TraesCS5B02G178600	C5	C5.enrich	TraesCS7A02G145800	C6	C6.enrich	ERF	ERF
TraesCS5B02G178600	C5	C5.enrich	TraesCS4B02G268100	C6	C6.enrich	ERF	ERF
TraesCS5B02G201900	C5	C5.enrich	TraesCS6B02G280800	C6	C6.enrich	G2-like	ERF
TraesCS5B02G201900	C5	C5.enrich	TraesCS5A02G424600	C6	C6.enrich	G2-like	ERF
TraesCS5B02G311900	C5	C5.enrich	TraesCS1B02G071700	C6	C6.enrich	ERF	C2H2
TraesCS5B02G311900	C5	C5.enrich	TraesCS1D02G055600	C6	C6.enrich	ERF	C2H2
TraesCS5B02G311900	C5	C5.enrich	TraesCS4B02G101400	C6	C6.enrich	ERF	B3
TraesCS5B02G311900	C5	C5.enrich	TraesCS4B02G122100	C6	C6.enrich	ERF	ERF
TraesCS5B02G311900	C5	C5.enrich	TraesCS4D02G120200	C6	C6.enrich	ERF	ERF
TraesCS5B02G311900	C5	C5.enrich	TraesCS4D02G267500	C6	C6.enrich	ERF	ERF
TraesCS5B02G311900	C5	C5.enrich	TraesCS6B02G280800	C6	C6.enrich	ERF	ERF
TraesCS5B02G311900	C5	C5.enrich	TraesCS5A02G424600	C6	C6.enrich	ERF	ERF
TraesCS5B02G311900	C5	C5.enrich	TraesCS6D02G281200	C6	C6.enrich	ERF	ERF
TraesCS5B02G311900	C5	C5.enrich	TraesCS6D02G225700	C6	C6.enrich	ERF	ERF
TraesCS5B02G311900	C5	C5.enrich	TraesCS6A02G243500	C6	C6.enrich	ERF	ERF
TraesCS5B02G311900	C5	C5.enrich	TraesCS7A02G145800	C6	C6.enrich	ERF	ERF
TraesCS5B02G311900	C5	C5.enrich	TraesCS4B02G268100	C6	C6.enrich	ERF	ERF
TraesCS5B02G315100	C5	C5.enrich	TraesCS2A02G288000	C6	C6.enrich	HD-ZIP	ERF
TraesCS5B02G315100	C5	C5.enrich	TraesCS2D02G286300	C6	C6.enrich	HD-ZIP	ERF
TraesCS5B02G315100	C5	C5.enrich	TraesCS7A02G145800	C6	C6.enrich	HD-ZIP	ERF
TraesCS5B02G315100	C5	C5.enrich	TraesCS6D02G281200	C6	C6.enrich	HD-ZIP	ERF
TraesCS5B02G315100	C5	C5.enrich	TraesCS6D02G225700	C6	C6.enrich	HD-ZIP	ERF
TraesCS5B02G330100	C5	C5.enrich	TraesCS4B02G122100	C6	C6.enrich	MYB	ERF
TraesCS5B02G330100	C5	C5.enrich	TraesCS5B02G426600	C6	C6.enrich	MYB	ERF
TraesCS5B02G330100	C5	C5.enrich	TraesCS3A02G149000	C6	C6.enrich	MYB	ERF
TraesCS5B02G330100	C5	C5.enrich	TraesCS6D02G225700	C6	C6.enrich	MYB	ERF
TraesCS5B02G330100	C5	C5.enrich	TraesCS6B02G280800	C6	C6.enrich	MYB	ERF
TraesCS5B02G330100	C5	C5.enrich	TraesCS6D02G281200	C6	C6.enrich	MYB	ERF
TraesCS5B02G330100	C5	C5.enrich	TraesCS7A02G145800	C6	C6.enrich	MYB	ERF
TraesCS5B02G330100	C5	C5.enrich	TraesCS4D02G120200	C6	C6.enrich	MYB	ERF
TraesCS5B02G330100	C5	C5.enrich	TraesCS1D02G055600	C6	C6.enrich	MYB	C2H2
TraesCS5B02G406300	C5	C5.enrich	TraesCS6B02G280800	C6	C6.enrich	G2-like	ERF
TraesCS5B02G406300	C5	C5.enrich	TraesCS5A02G424600	C6	C6.enrich	G2-like	ERF
TraesCS5B02G422000	C5	C5.enrich	TraesCS2D02G286300	C6	C6.enrich	bHLH	ERF
TraesCS5B02G422000	C5	C5.enrich	TraesCS3B02G505100	C6	C6.enrich	bHLH	B3
TraesCS5B02G422000	C5	C5.enrich	TraesCS6D02G225700	C6	C6.enrich	bHLH	ERF
TraesCS5B02G422000	C5	C5.enrich	TraesCS7A02G145800	C6	C6.enrich	bHLH	ERF
TraesCS5B02G422000	C5	C5.enrich	TraesCS3A02G149000	C6	C6.enrich	bHLH	ERF
TraesCS5B02G422000	C5	C5.enrich	TraesCS3D02G157100	C6	C6.enrich	bHLH	ERF
TraesCS5B02G422000	C5	C5.enrich	TraesCS4A02G193100	C6	C6.enrich	bHLH	ERF
TraesCS5B02G422000	C5	C5.enrich	TraesCS4B02G122100	C6	C6.enrich	bHLH	ERF
TraesCS5B02G422000	C5	C5.enrich	TraesCS6D02G049300	C6	C6.enrich	bHLH	C2H2
TraesCS5B02G422000	C5	C5.enrich	TraesCS4D02G120200	C6	C6.enrich	bHLH	ERF
TraesCS5B02G422000	C5	C5.enrich	TraesCS5B02G426600	C6	C6.enrich	bHLH	ERF
TraesCS5B02G422000	C5	C5.enrich	TraesCS5A02G424600	C6	C6.enrich	bHLH	ERF
TraesCS5B02G422000	C5	C5.enrich	TraesCS6B02G280800	C6	C6.enrich	bHLH	ERF
TraesCS5B02G426200	C5	C5.enrich	TraesCS5A02G424600	C6	C6.enrich	TCP	ERF
TraesCS5B02G426200	C5	C5.enrich	TraesCS4D02G120200	C6	C6.enrich	TCP	ERF
TraesCS5B02G426200	C5	C5.enrich	TraesCS4A02G193100	C6	C6.enrich	TCP	ERF
TraesCS5B02G492600	C5	C5.enrich	TraesCS6B02G280800	C6	C6.enrich	Dof	ERF
TraesCS5B02G492600	C5	C5.enrich	TraesCS6D02G281200	C6	C6.enrich	Dof	ERF
TraesCS5B02G519700	C5	C5.enrich	TraesCS2D02G286300	C6	C6.enrich	C2H2	ERF
TraesCS5B02G519700	C5	C5.enrich	TraesCS3B02G505100	C6	C6.enrich	C2H2	B3
TraesCS5B02G519700	C5	C5.enrich	TraesCS4D02G120200	C6	C6.enrich	C2H2	ERF
TraesCS5B02G519700	C5	C5.enrich	TraesCS7A02G145800	C6	C6.enrich	C2H2	ERF
TraesCS5D02G093800	C5	C5.enrich	TraesCS6B02G280800	C6	C6.enrich	Dof	ERF
TraesCS5D02G093800	C5	C5.enrich	TraesCS6D02G281200	C6	C6.enrich	Dof	ERF
TraesCS5D02G099100	C5	C5.enrich	TraesCS4B02G122100	C6	C6.enrich	MYB	ERF
TraesCS5D02G099100	C5	C5.enrich	TraesCS5B02G426600	C6	C6.enrich	MYB	ERF
TraesCS5D02G099100	C5	C5.enrich	TraesCS3A02G149000	C6	C6.enrich	MYB	ERF
TraesCS5D02G099100	C5	C5.enrich	TraesCS6D02G225700	C6	C6.enrich	MYB	ERF
TraesCS5D02G099100	C5	C5.enrich	TraesCS6B02G280800	C6	C6.enrich	MYB	ERF
TraesCS5D02G099100	C5	C5.enrich	TraesCS6D02G281200	C6	C6.enrich	MYB	ERF
TraesCS5D02G099100	C5	C5.enrich	TraesCS7A02G145800	C6	C6.enrich	MYB	ERF
TraesCS5D02G099100	C5	C5.enrich	TraesCS4D02G120200	C6	C6.enrich	MYB	ERF
TraesCS5D02G099100	C5	C5.enrich	TraesCS1D02G055600	C6	C6.enrich	MYB	C2H2
TraesCS5D02G100700	C5	C5.enrich	TraesCS3B02G505100	C6	C6.enrich	bZIP	B3
TraesCS5D02G100700	C5	C5.enrich	TraesCS6D02G225700	C6	C6.enrich	bZIP	ERF
TraesCS5D02G100700	C5	C5.enrich	TraesCS3A02G149000	C6	C6.enrich	bZIP	ERF
TraesCS5D02G100700	C5	C5.enrich	TraesCS3D02G157100	C6	C6.enrich	bZIP	ERF
TraesCS5D02G100700	C5	C5.enrich	TraesCS4A02G193100	C6	C6.enrich	bZIP	ERF
TraesCS5D02G100700	C5	C5.enrich	TraesCS4B02G122100	C6	C6.enrich	bZIP	ERF
TraesCS5D02G134700	C5	C5.enrich	TraesCS5B02G426600	C6	C6.enrich	B3	ERF
TraesCS5D02G134700	C5	C5.enrich	TraesCS6D02G225700	C6	C6.enrich	B3	ERF
TraesCS5D02G183500	C5	C5.enrich	TraesCS3B02G505100	C6	C6.enrich	bZIP	B3
TraesCS5D02G183500	C5	C5.enrich	TraesCS6D02G225700	C6	C6.enrich	bZIP	ERF
TraesCS5D02G183500	C5	C5.enrich	TraesCS3A02G149000	C6	C6.enrich	bZIP	ERF
TraesCS5D02G183500	C5	C5.enrich	TraesCS3D02G157100	C6	C6.enrich	bZIP	ERF
TraesCS5D02G183500	C5	C5.enrich	TraesCS4A02G193100	C6	C6.enrich	bZIP	ERF
TraesCS5D02G183500	C5	C5.enrich	TraesCS4B02G122100	C6	C6.enrich	bZIP	ERF
TraesCS5D02G185300	C5	C5.enrich	TraesCS1B02G071700	C6	C6.enrich	ERF	C2H2
TraesCS5D02G185300	C5	C5.enrich	TraesCS1D02G055600	C6	C6.enrich	ERF	C2H2
TraesCS5D02G185300	C5	C5.enrich	TraesCS4B02G101400	C6	C6.enrich	ERF	B3
TraesCS5D02G185300	C5	C5.enrich	TraesCS4B02G122100	C6	C6.enrich	ERF	ERF
TraesCS5D02G185300	C5	C5.enrich	TraesCS4D02G120200	C6	C6.enrich	ERF	ERF
TraesCS5D02G185300	C5	C5.enrich	TraesCS4D02G267500	C6	C6.enrich	ERF	ERF
TraesCS5D02G185300	C5	C5.enrich	TraesCS5A02G424600	C6	C6.enrich	ERF	ERF
TraesCS5D02G185300	C5	C5.enrich	TraesCS6B02G280800	C6	C6.enrich	ERF	ERF
TraesCS5D02G185300	C5	C5.enrich	TraesCS6D02G281200	C6	C6.enrich	ERF	ERF
TraesCS5D02G185300	C5	C5.enrich	TraesCS6D02G225700	C6	C6.enrich	ERF	ERF
TraesCS5D02G185300	C5	C5.enrich	TraesCS6A02G243500	C6	C6.enrich	ERF	ERF
TraesCS5D02G185300	C5	C5.enrich	TraesCS7A02G145800	C6	C6.enrich	ERF	ERF
TraesCS5D02G185300	C5	C5.enrich	TraesCS4B02G268100	C6	C6.enrich	ERF	ERF
TraesCS5D02G209600	C5	C5.enrich	TraesCS6B02G280800	C6	C6.enrich	G2-like	ERF
TraesCS5D02G209600	C5	C5.enrich	TraesCS5A02G424600	C6	C6.enrich	G2-like	ERF
TraesCS5D02G210900	C5	C5.enrich	TraesCS4B02G122100	C6	C6.enrich	MYB	ERF
TraesCS5D02G210900	C5	C5.enrich	TraesCS5B02G426600	C6	C6.enrich	MYB	ERF
TraesCS5D02G210900	C5	C5.enrich	TraesCS3A02G149000	C6	C6.enrich	MYB	ERF
TraesCS5D02G210900	C5	C5.enrich	TraesCS6D02G225700	C6	C6.enrich	MYB	ERF
TraesCS5D02G210900	C5	C5.enrich	TraesCS6B02G280800	C6	C6.enrich	MYB	ERF
TraesCS5D02G210900	C5	C5.enrich	TraesCS6D02G281200	C6	C6.enrich	MYB	ERF
TraesCS5D02G210900	C5	C5.enrich	TraesCS7A02G145800	C6	C6.enrich	MYB	ERF
TraesCS5D02G210900	C5	C5.enrich	TraesCS4D02G120200	C6	C6.enrich	MYB	ERF
TraesCS5D02G210900	C5	C5.enrich	TraesCS1D02G055600	C6	C6.enrich	MYB	C2H2
TraesCS5D02G316300	C5	C5.enrich	TraesCS4B02G101400	C6	C6.enrich	TCP	B3
TraesCS5D02G316300	C5	C5.enrich	TraesCS5A02G424600	C6	C6.enrich	TCP	ERF
TraesCS5D02G316300	C5	C5.enrich	TraesCS4D02G120200	C6	C6.enrich	TCP	ERF
TraesCS5D02G316300	C5	C5.enrich	TraesCS3A02G149000	C6	C6.enrich	TCP	ERF
TraesCS5D02G316300	C5	C5.enrich	TraesCS4A02G193100	C6	C6.enrich	TCP	ERF
TraesCS5D02G432500	C5	C5.enrich	TraesCS5A02G424600	C6	C6.enrich	TCP	ERF
TraesCS5D02G432500	C5	C5.enrich	TraesCS4D02G120200	C6	C6.enrich	TCP	ERF
TraesCS5D02G432500	C5	C5.enrich	TraesCS4A02G193100	C6	C6.enrich	TCP	ERF
TraesCS5D02G493000	C5	C5.enrich	TraesCS6B02G280800	C6	C6.enrich	Dof	ERF
TraesCS5D02G493000	C5	C5.enrich	TraesCS6D02G281200	C6	C6.enrich	Dof	ERF
TraesCS5D02G519100	C5	C5.enrich	TraesCS2D02G286300	C6	C6.enrich	C2H2	ERF
TraesCS5D02G519100	C5	C5.enrich	TraesCS3B02G505100	C6	C6.enrich	C2H2	B3
TraesCS5D02G519100	C5	C5.enrich	TraesCS4D02G120200	C6	C6.enrich	C2H2	ERF
TraesCS5D02G519100	C5	C5.enrich	TraesCS7A02G145800	C6	C6.enrich	C2H2	ERF
TraesCS6A02G045100	C5	C5.enrich	TraesCS2D02G286300	C6	C6.enrich	bHLH	ERF
TraesCS6A02G045100	C5	C5.enrich	TraesCS4D02G120200	C6	C6.enrich	bHLH	ERF
TraesCS6A02G120300	C5	C5.enrich	TraesCS2D02G286300	C6	C6.enrich	HD-ZIP	ERF
TraesCS6A02G120300	C5	C5.enrich	TraesCS7A02G145800	C6	C6.enrich	HD-ZIP	ERF
TraesCS6A02G120300	C5	C5.enrich	TraesCS6D02G281200	C6	C6.enrich	HD-ZIP	ERF
TraesCS6A02G120300	C5	C5.enrich	TraesCS2A02G288000	C6	C6.enrich	HD-ZIP	ERF
TraesCS6A02G120300	C5	C5.enrich	TraesCS6D02G225700	C6	C6.enrich	HD-ZIP	ERF
TraesCS6A02G155400	C5	C5.enrich	TraesCS6B02G280800	C6	C6.enrich	G2-like	ERF
TraesCS6A02G155400	C5	C5.enrich	TraesCS5A02G424600	C6	C6.enrich	G2-like	ERF
TraesCS6A02G208700	C5	C5.enrich	TraesCS1B02G071700	C6	C6.enrich	ERF	C2H2
TraesCS6A02G208700	C5	C5.enrich	TraesCS1D02G055600	C6	C6.enrich	ERF	C2H2
TraesCS6A02G208700	C5	C5.enrich	TraesCS4B02G101400	C6	C6.enrich	ERF	B3
TraesCS6A02G208700	C5	C5.enrich	TraesCS4B02G122100	C6	C6.enrich	ERF	ERF
TraesCS6A02G208700	C5	C5.enrich	TraesCS4D02G120200	C6	C6.enrich	ERF	ERF
TraesCS6A02G208700	C5	C5.enrich	TraesCS4D02G267500	C6	C6.enrich	ERF	ERF
TraesCS6A02G208700	C5	C5.enrich	TraesCS6B02G280800	C6	C6.enrich	ERF	ERF
TraesCS6A02G208700	C5	C5.enrich	TraesCS5A02G424600	C6	C6.enrich	ERF	ERF
TraesCS6A02G208700	C5	C5.enrich	TraesCS6D02G281200	C6	C6.enrich	ERF	ERF
TraesCS6A02G208700	C5	C5.enrich	TraesCS6D02G225700	C6	C6.enrich	ERF	ERF
TraesCS6A02G208700	C5	C5.enrich	TraesCS6A02G243500	C6	C6.enrich	ERF	ERF
TraesCS6A02G208700	C5	C5.enrich	TraesCS7A02G145800	C6	C6.enrich	ERF	ERF
TraesCS6A02G208700	C5	C5.enrich	TraesCS4B02G268100	C6	C6.enrich	ERF	ERF
TraesCS6A02G266400	C5	C5.enrich	TraesCS6B02G280800	C6	C6.enrich	G2-like	ERF
TraesCS6A02G266400	C5	C5.enrich	TraesCS5A02G424600	C6	C6.enrich	G2-like	ERF
TraesCS6A02G269000	C5	C5.enrich	TraesCS6B02G280800	C6	C6.enrich	G2-like	ERF
TraesCS6A02G269000	C5	C5.enrich	TraesCS5A02G424600	C6	C6.enrich	G2-like	ERF
TraesCS6A02G274000	C5	C5.enrich	TraesCS6B02G280800	C6	C6.enrich	Dof	ERF
TraesCS6A02G274000	C5	C5.enrich	TraesCS6D02G281200	C6	C6.enrich	Dof	ERF
TraesCS6A02G301900	C5	C5.enrich	TraesCS1B02G071700	C6	C6.enrich	ERF	C2H2
TraesCS6A02G301900	C5	C5.enrich	TraesCS1D02G055600	C6	C6.enrich	ERF	C2H2
TraesCS6A02G301900	C5	C5.enrich	TraesCS4B02G101400	C6	C6.enrich	ERF	B3
TraesCS6A02G301900	C5	C5.enrich	TraesCS4B02G122100	C6	C6.enrich	ERF	ERF
TraesCS6A02G301900	C5	C5.enrich	TraesCS4D02G120200	C6	C6.enrich	ERF	ERF
TraesCS6A02G301900	C5	C5.enrich	TraesCS4D02G267500	C6	C6.enrich	ERF	ERF
TraesCS6A02G301900	C5	C5.enrich	TraesCS6B02G280800	C6	C6.enrich	ERF	ERF
TraesCS6A02G301900	C5	C5.enrich	TraesCS5A02G424600	C6	C6.enrich	ERF	ERF
TraesCS6A02G301900	C5	C5.enrich	TraesCS6D02G281200	C6	C6.enrich	ERF	ERF
TraesCS6A02G301900	C5	C5.enrich	TraesCS6D02G225700	C6	C6.enrich	ERF	ERF
TraesCS6A02G301900	C5	C5.enrich	TraesCS6A02G243500	C6	C6.enrich	ERF	ERF
TraesCS6A02G301900	C5	C5.enrich	TraesCS7A02G145800	C6	C6.enrich	ERF	ERF
TraesCS6A02G301900	C5	C5.enrich	TraesCS4B02G268100	C6	C6.enrich	ERF	ERF
TraesCS6A02G343300	C5	C5.enrich	TraesCS1B02G071700	C6	C6.enrich	ERF	C2H2
TraesCS6A02G343300	C5	C5.enrich	TraesCS1D02G055600	C6	C6.enrich	ERF	C2H2
TraesCS6A02G343300	C5	C5.enrich	TraesCS4B02G101400	C6	C6.enrich	ERF	B3
TraesCS6A02G343300	C5	C5.enrich	TraesCS4B02G122100	C6	C6.enrich	ERF	ERF
TraesCS6A02G343300	C5	C5.enrich	TraesCS4D02G120200	C6	C6.enrich	ERF	ERF
TraesCS6A02G343300	C5	C5.enrich	TraesCS4D02G267500	C6	C6.enrich	ERF	ERF
TraesCS6A02G343300	C5	C5.enrich	TraesCS6B02G280800	C6	C6.enrich	ERF	ERF
TraesCS6A02G343300	C5	C5.enrich	TraesCS5A02G424600	C6	C6.enrich	ERF	ERF
TraesCS6A02G343300	C5	C5.enrich	TraesCS6D02G281200	C6	C6.enrich	ERF	ERF
TraesCS6A02G343300	C5	C5.enrich	TraesCS6D02G225700	C6	C6.enrich	ERF	ERF
TraesCS6A02G343300	C5	C5.enrich	TraesCS6A02G243500	C6	C6.enrich	ERF	ERF
TraesCS6A02G343300	C5	C5.enrich	TraesCS7A02G145800	C6	C6.enrich	ERF	ERF
TraesCS6A02G343300	C5	C5.enrich	TraesCS4B02G268100	C6	C6.enrich	ERF	ERF
TraesCS6B02G060700	C5	C5.enrich	TraesCS2D02G286300	C6	C6.enrich	bHLH	ERF
TraesCS6B02G060700	C5	C5.enrich	TraesCS4D02G120200	C6	C6.enrich	bHLH	ERF
TraesCS6B02G148700	C5	C5.enrich	TraesCS2D02G286300	C6	C6.enrich	HD-ZIP	ERF
TraesCS6B02G148700	C5	C5.enrich	TraesCS7A02G145800	C6	C6.enrich	HD-ZIP	ERF
TraesCS6B02G148700	C5	C5.enrich	TraesCS6D02G281200	C6	C6.enrich	HD-ZIP	ERF
TraesCS6B02G148700	C5	C5.enrich	TraesCS2A02G288000	C6	C6.enrich	HD-ZIP	ERF
TraesCS6B02G148700	C5	C5.enrich	TraesCS6D02G225700	C6	C6.enrich	HD-ZIP	ERF
TraesCS6B02G182500	C5	C5.enrich	TraesCS6D02G281200	C6	C6.enrich	bZIP	ERF
TraesCS6B02G182500	C5	C5.enrich	TraesCS3B02G505100	C6	C6.enrich	bZIP	B3
TraesCS6B02G182500	C5	C5.enrich	TraesCS6D02G225700	C6	C6.enrich	bZIP	ERF
TraesCS6B02G182500	C5	C5.enrich	TraesCS4A02G193100	C6	C6.enrich	bZIP	ERF
TraesCS6B02G182500	C5	C5.enrich	TraesCS4B02G122100	C6	C6.enrich	bZIP	ERF
TraesCS6B02G182500	C5	C5.enrich	TraesCS4B02G268100	C6	C6.enrich	bZIP	ERF
TraesCS6B02G182500	C5	C5.enrich	TraesCS4D02G120200	C6	C6.enrich	bZIP	ERF
TraesCS6B02G182500	C5	C5.enrich	TraesCS3A02G149000	C6	C6.enrich	bZIP	ERF
TraesCS6B02G182500	C5	C5.enrich	TraesCS3D02G157100	C6	C6.enrich	bZIP	ERF
TraesCS6B02G183500	C5	C5.enrich	TraesCS6B02G280800	C6	C6.enrich	G2-like	ERF
TraesCS6B02G183500	C5	C5.enrich	TraesCS5A02G424600	C6	C6.enrich	G2-like	ERF
TraesCS6B02G270100	C5	C5.enrich	TraesCS6B02G280800	C6	C6.enrich	Dof	ERF
TraesCS6B02G270100	C5	C5.enrich	TraesCS6D02G281200	C6	C6.enrich	Dof	ERF
TraesCS6B02G281000	C5	C5.enrich	TraesCS1B02G071700	C6	C6.enrich	ERF	C2H2
TraesCS6B02G281000	C5	C5.enrich	TraesCS1D02G055600	C6	C6.enrich	ERF	C2H2
TraesCS6B02G281000	C5	C5.enrich	TraesCS4B02G101400	C6	C6.enrich	ERF	B3
TraesCS6B02G281000	C5	C5.enrich	TraesCS4B02G122100	C6	C6.enrich	ERF	ERF
TraesCS6B02G281000	C5	C5.enrich	TraesCS4D02G120200	C6	C6.enrich	ERF	ERF
TraesCS6B02G281000	C5	C5.enrich	TraesCS4D02G267500	C6	C6.enrich	ERF	ERF
TraesCS6B02G281000	C5	C5.enrich	TraesCS6B02G280800	C6	C6.enrich	ERF	ERF
TraesCS6B02G281000	C5	C5.enrich	TraesCS5A02G424600	C6	C6.enrich	ERF	ERF
TraesCS6B02G281000	C5	C5.enrich	TraesCS6D02G281200	C6	C6.enrich	ERF	ERF
TraesCS6B02G281000	C5	C5.enrich	TraesCS6D02G225700	C6	C6.enrich	ERF	ERF
TraesCS6B02G281000	C5	C5.enrich	TraesCS6A02G243500	C6	C6.enrich	ERF	ERF
TraesCS6B02G281000	C5	C5.enrich	TraesCS7A02G145800	C6	C6.enrich	ERF	ERF
TraesCS6B02G281000	C5	C5.enrich	TraesCS4B02G268100	C6	C6.enrich	ERF	ERF
TraesCS6B02G301500	C5	C5.enrich	TraesCS6B02G280800	C6	C6.enrich	Dof	ERF
TraesCS6B02G301500	C5	C5.enrich	TraesCS6D02G281200	C6	C6.enrich	Dof	ERF
TraesCS6B02G317100	C5	C5.enrich	TraesCS6B02G280800	C6	C6.enrich	Dof	ERF
TraesCS6B02G317100	C5	C5.enrich	TraesCS6D02G281200	C6	C6.enrich	Dof	ERF
TraesCS6B02G321100	C5	C5.enrich	TraesCS2A02G288000	C6	C6.enrich	HD-ZIP	ERF
TraesCS6B02G321100	C5	C5.enrich	TraesCS2D02G286300	C6	C6.enrich	HD-ZIP	ERF
TraesCS6B02G321100	C5	C5.enrich	TraesCS7A02G145800	C6	C6.enrich	HD-ZIP	ERF
TraesCS6B02G321100	C5	C5.enrich	TraesCS6D02G281200	C6	C6.enrich	HD-ZIP	ERF
TraesCS6B02G321100	C5	C5.enrich	TraesCS6D02G225700	C6	C6.enrich	HD-ZIP	ERF
TraesCS6B02G331000	C5	C5.enrich	TraesCS1B02G071700	C6	C6.enrich	ERF	C2H2
TraesCS6B02G331000	C5	C5.enrich	TraesCS1D02G055600	C6	C6.enrich	ERF	C2H2
TraesCS6B02G331000	C5	C5.enrich	TraesCS4B02G101400	C6	C6.enrich	ERF	B3
TraesCS6B02G331000	C5	C5.enrich	TraesCS4B02G122100	C6	C6.enrich	ERF	ERF
TraesCS6B02G331000	C5	C5.enrich	TraesCS4D02G120200	C6	C6.enrich	ERF	ERF
TraesCS6B02G331000	C5	C5.enrich	TraesCS4D02G267500	C6	C6.enrich	ERF	ERF
TraesCS6B02G331000	C5	C5.enrich	TraesCS6B02G280800	C6	C6.enrich	ERF	ERF
TraesCS6B02G331000	C5	C5.enrich	TraesCS5A02G424600	C6	C6.enrich	ERF	ERF
TraesCS6B02G331000	C5	C5.enrich	TraesCS6D02G281200	C6	C6.enrich	ERF	ERF
TraesCS6B02G331000	C5	C5.enrich	TraesCS6D02G225700	C6	C6.enrich	ERF	ERF
TraesCS6B02G331000	C5	C5.enrich	TraesCS6A02G243500	C6	C6.enrich	ERF	ERF
TraesCS6B02G331000	C5	C5.enrich	TraesCS7A02G145800	C6	C6.enrich	ERF	ERF
TraesCS6B02G331000	C5	C5.enrich	TraesCS4B02G268100	C6	C6.enrich	ERF	ERF
TraesCS6B02G334700	C5	C5.enrich	TraesCS6D02G049300	C6	C6.enrich	AP2	C2H2
TraesCS6B02G334700	C5	C5.enrich	TraesCS2D02G286300	C6	C6.enrich	AP2	ERF
TraesCS6B02G334700	C5	C5.enrich	TraesCS6D02G225700	C6	C6.enrich	AP2	ERF
TraesCS6B02G334700	C5	C5.enrich	TraesCS6A02G243500	C6	C6.enrich	AP2	ERF
TraesCS6B02G375400	C5	C5.enrich	TraesCS1B02G071700	C6	C6.enrich	ERF	C2H2
TraesCS6B02G375400	C5	C5.enrich	TraesCS1D02G055600	C6	C6.enrich	ERF	C2H2
TraesCS6B02G375400	C5	C5.enrich	TraesCS4B02G101400	C6	C6.enrich	ERF	B3
TraesCS6B02G375400	C5	C5.enrich	TraesCS4B02G122100	C6	C6.enrich	ERF	ERF
TraesCS6B02G375400	C5	C5.enrich	TraesCS4D02G120200	C6	C6.enrich	ERF	ERF
TraesCS6B02G375400	C5	C5.enrich	TraesCS4D02G267500	C6	C6.enrich	ERF	ERF
TraesCS6B02G375400	C5	C5.enrich	TraesCS6B02G280800	C6	C6.enrich	ERF	ERF
TraesCS6B02G375400	C5	C5.enrich	TraesCS5A02G424600	C6	C6.enrich	ERF	ERF
TraesCS6B02G375400	C5	C5.enrich	TraesCS6D02G281200	C6	C6.enrich	ERF	ERF
TraesCS6B02G375400	C5	C5.enrich	TraesCS6D02G225700	C6	C6.enrich	ERF	ERF
TraesCS6B02G375400	C5	C5.enrich	TraesCS6A02G243500	C6	C6.enrich	ERF	ERF
TraesCS6B02G375400	C5	C5.enrich	TraesCS7A02G145800	C6	C6.enrich	ERF	ERF
TraesCS6B02G375400	C5	C5.enrich	TraesCS4B02G268100	C6	C6.enrich	ERF	ERF
TraesCS6D02G051600	C5	C5.enrich	TraesCS2D02G286300	C6	C6.enrich	bHLH	ERF
TraesCS6D02G051600	C5	C5.enrich	TraesCS4D02G120200	C6	C6.enrich	bHLH	ERF
TraesCS6D02G144400	C5	C5.enrich	TraesCS6D02G281200	C6	C6.enrich	bZIP	ERF
TraesCS6D02G144400	C5	C5.enrich	TraesCS3B02G505100	C6	C6.enrich	bZIP	B3
TraesCS6D02G144400	C5	C5.enrich	TraesCS6D02G225700	C6	C6.enrich	bZIP	ERF
TraesCS6D02G144400	C5	C5.enrich	TraesCS4A02G193100	C6	C6.enrich	bZIP	ERF
TraesCS6D02G144400	C5	C5.enrich	TraesCS4B02G122100	C6	C6.enrich	bZIP	ERF
TraesCS6D02G144400	C5	C5.enrich	TraesCS4B02G268100	C6	C6.enrich	bZIP	ERF
TraesCS6D02G144400	C5	C5.enrich	TraesCS4D02G120200	C6	C6.enrich	bZIP	ERF
TraesCS6D02G144400	C5	C5.enrich	TraesCS3A02G149000	C6	C6.enrich	bZIP	ERF
TraesCS6D02G144400	C5	C5.enrich	TraesCS3D02G157100	C6	C6.enrich	bZIP	ERF
TraesCS6D02G245900	C5	C5.enrich	TraesCS6B02G280800	C6	C6.enrich	G2-like	ERF
TraesCS6D02G245900	C5	C5.enrich	TraesCS5A02G424600	C6	C6.enrich	G2-like	ERF
TraesCS6D02G254200	C5	C5.enrich	TraesCS6B02G280800	C6	C6.enrich	Dof	ERF
TraesCS6D02G254200	C5	C5.enrich	TraesCS6D02G281200	C6	C6.enrich	Dof	ERF
TraesCS6D02G272000	C5	C5.enrich	TraesCS2A02G288000	C6	C6.enrich	HD-ZIP	ERF
TraesCS6D02G272000	C5	C5.enrich	TraesCS2D02G286300	C6	C6.enrich	HD-ZIP	ERF
TraesCS6D02G272000	C5	C5.enrich	TraesCS7A02G145800	C6	C6.enrich	HD-ZIP	ERF
TraesCS6D02G272000	C5	C5.enrich	TraesCS6D02G281200	C6	C6.enrich	HD-ZIP	ERF
TraesCS6D02G272000	C5	C5.enrich	TraesCS6D02G225700	C6	C6.enrich	HD-ZIP	ERF
TraesCS7A02G008800	C5	C5.enrich	TraesCS2D02G286300	C6	C6.enrich	NAC	ERF
TraesCS7A02G008800	C5	C5.enrich	TraesCS6D02G049300	C6	C6.enrich	NAC	C2H2
TraesCS7A02G008800	C5	C5.enrich	TraesCS4D02G120200	C6	C6.enrich	NAC	ERF
TraesCS7A02G008800	C5	C5.enrich	TraesCS4A02G193100	C6	C6.enrich	NAC	ERF
TraesCS7A02G008800	C5	C5.enrich	TraesCS4B02G122100	C6	C6.enrich	NAC	ERF
TraesCS7A02G008800	C5	C5.enrich	TraesCS5A02G424600	C6	C6.enrich	NAC	ERF
TraesCS7A02G008800	C5	C5.enrich	TraesCS7A02G145800	C6	C6.enrich	NAC	ERF
TraesCS7A02G008800	C5	C5.enrich	TraesCS4D02G267500	C6	C6.enrich	NAC	ERF
TraesCS7A02G057800	C5	C5.enrich	TraesCS1B02G071700	C6	C6.enrich	ERF	C2H2
TraesCS7A02G057800	C5	C5.enrich	TraesCS1D02G055600	C6	C6.enrich	ERF	C2H2
TraesCS7A02G057800	C5	C5.enrich	TraesCS4B02G101400	C6	C6.enrich	ERF	B3
TraesCS7A02G057800	C5	C5.enrich	TraesCS4B02G122100	C6	C6.enrich	ERF	ERF
TraesCS7A02G057800	C5	C5.enrich	TraesCS4D02G120200	C6	C6.enrich	ERF	ERF
TraesCS7A02G057800	C5	C5.enrich	TraesCS6B02G280800	C6	C6.enrich	ERF	ERF
TraesCS7A02G057800	C5	C5.enrich	TraesCS4D02G267500	C6	C6.enrich	ERF	ERF
TraesCS7A02G057800	C5	C5.enrich	TraesCS5A02G424600	C6	C6.enrich	ERF	ERF
TraesCS7A02G057800	C5	C5.enrich	TraesCS6D02G281200	C6	C6.enrich	ERF	ERF
TraesCS7A02G057800	C5	C5.enrich	TraesCS6D02G225700	C6	C6.enrich	ERF	ERF
TraesCS7A02G057800	C5	C5.enrich	TraesCS6A02G243500	C6	C6.enrich	ERF	ERF
TraesCS7A02G057800	C5	C5.enrich	TraesCS7A02G145800	C6	C6.enrich	ERF	ERF
TraesCS7A02G128800	C5	C5.enrich	TraesCS1B02G071700	C6	C6.enrich	ERF	C2H2
TraesCS7A02G128800	C5	C5.enrich	TraesCS1D02G055600	C6	C6.enrich	ERF	C2H2
TraesCS7A02G128800	C5	C5.enrich	TraesCS4B02G101400	C6	C6.enrich	ERF	B3
TraesCS7A02G128800	C5	C5.enrich	TraesCS4B02G122100	C6	C6.enrich	ERF	ERF
TraesCS7A02G128800	C5	C5.enrich	TraesCS4D02G120200	C6	C6.enrich	ERF	ERF
TraesCS7A02G128800	C5	C5.enrich	TraesCS4D02G267500	C6	C6.enrich	ERF	ERF
TraesCS7A02G128800	C5	C5.enrich	TraesCS6B02G280800	C6	C6.enrich	ERF	ERF
TraesCS7A02G128800	C5	C5.enrich	TraesCS5A02G424600	C6	C6.enrich	ERF	ERF
TraesCS7A02G128800	C5	C5.enrich	TraesCS6D02G281200	C6	C6.enrich	ERF	ERF
TraesCS7A02G128800	C5	C5.enrich	TraesCS6D02G225700	C6	C6.enrich	ERF	ERF
TraesCS7A02G128800	C5	C5.enrich	TraesCS6A02G243500	C6	C6.enrich	ERF	ERF
TraesCS7A02G128800	C5	C5.enrich	TraesCS7A02G145800	C6	C6.enrich	ERF	ERF
TraesCS7A02G128800	C5	C5.enrich	TraesCS4B02G268100	C6	C6.enrich	ERF	ERF
TraesCS7A02G147500	C5	C5.enrich	TraesCS2D02G286300	C6	C6.enrich	bHLH	ERF
TraesCS7A02G147500	C5	C5.enrich	TraesCS3B02G505100	C6	C6.enrich	bHLH	B3
TraesCS7A02G147500	C5	C5.enrich	TraesCS6D02G225700	C6	C6.enrich	bHLH	ERF
TraesCS7A02G147500	C5	C5.enrich	TraesCS7A02G145800	C6	C6.enrich	bHLH	ERF
TraesCS7A02G147500	C5	C5.enrich	TraesCS3A02G149000	C6	C6.enrich	bHLH	ERF
TraesCS7A02G147500	C5	C5.enrich	TraesCS3D02G157100	C6	C6.enrich	bHLH	ERF
TraesCS7A02G147500	C5	C5.enrich	TraesCS4A02G193100	C6	C6.enrich	bHLH	ERF
TraesCS7A02G147500	C5	C5.enrich	TraesCS4B02G122100	C6	C6.enrich	bHLH	ERF
TraesCS7A02G147500	C5	C5.enrich	TraesCS6D02G049300	C6	C6.enrich	bHLH	C2H2
TraesCS7A02G147500	C5	C5.enrich	TraesCS4D02G120200	C6	C6.enrich	bHLH	ERF
TraesCS7A02G147500	C5	C5.enrich	TraesCS5B02G426600	C6	C6.enrich	bHLH	ERF
TraesCS7A02G147500	C5	C5.enrich	TraesCS5A02G424600	C6	C6.enrich	bHLH	ERF
TraesCS7A02G147500	C5	C5.enrich	TraesCS6B02G280800	C6	C6.enrich	bHLH	ERF
TraesCS7A02G158000	C5	C5.enrich	TraesCS1B02G071700	C6	C6.enrich	ERF	C2H2
TraesCS7A02G158000	C5	C5.enrich	TraesCS1D02G055600	C6	C6.enrich	ERF	C2H2
TraesCS7A02G158000	C5	C5.enrich	TraesCS4B02G101400	C6	C6.enrich	ERF	B3
TraesCS7A02G158000	C5	C5.enrich	TraesCS4B02G122100	C6	C6.enrich	ERF	ERF
TraesCS7A02G158000	C5	C5.enrich	TraesCS4D02G120200	C6	C6.enrich	ERF	ERF
TraesCS7A02G158000	C5	C5.enrich	TraesCS4D02G267500	C6	C6.enrich	ERF	ERF
TraesCS7A02G158000	C5	C5.enrich	TraesCS6B02G280800	C6	C6.enrich	ERF	ERF
TraesCS7A02G158000	C5	C5.enrich	TraesCS5A02G424600	C6	C6.enrich	ERF	ERF
TraesCS7A02G158000	C5	C5.enrich	TraesCS6D02G281200	C6	C6.enrich	ERF	ERF
TraesCS7A02G158000	C5	C5.enrich	TraesCS6D02G225700	C6	C6.enrich	ERF	ERF
TraesCS7A02G158000	C5	C5.enrich	TraesCS6A02G243500	C6	C6.enrich	ERF	ERF
TraesCS7A02G158000	C5	C5.enrich	TraesCS7A02G145800	C6	C6.enrich	ERF	ERF
TraesCS7A02G158000	C5	C5.enrich	TraesCS4B02G268100	C6	C6.enrich	ERF	ERF
TraesCS7A02G180900	C5	C5.enrich	TraesCS1B02G071700	C6	C6.enrich	ERF	C2H2
TraesCS7A02G180900	C5	C5.enrich	TraesCS1D02G055600	C6	C6.enrich	ERF	C2H2
TraesCS7A02G180900	C5	C5.enrich	TraesCS4B02G101400	C6	C6.enrich	ERF	B3
TraesCS7A02G180900	C5	C5.enrich	TraesCS4B02G122100	C6	C6.enrich	ERF	ERF
TraesCS7A02G180900	C5	C5.enrich	TraesCS4D02G120200	C6	C6.enrich	ERF	ERF
TraesCS7A02G180900	C5	C5.enrich	TraesCS4D02G267500	C6	C6.enrich	ERF	ERF
TraesCS7A02G180900	C5	C5.enrich	TraesCS6B02G280800	C6	C6.enrich	ERF	ERF
TraesCS7A02G180900	C5	C5.enrich	TraesCS5A02G424600	C6	C6.enrich	ERF	ERF
TraesCS7A02G180900	C5	C5.enrich	TraesCS6D02G281200	C6	C6.enrich	ERF	ERF
TraesCS7A02G180900	C5	C5.enrich	TraesCS6D02G225700	C6	C6.enrich	ERF	ERF
TraesCS7A02G180900	C5	C5.enrich	TraesCS6A02G243500	C6	C6.enrich	ERF	ERF
TraesCS7A02G180900	C5	C5.enrich	TraesCS7A02G145800	C6	C6.enrich	ERF	ERF
TraesCS7A02G180900	C5	C5.enrich	TraesCS4B02G268100	C6	C6.enrich	ERF	ERF
TraesCS7A02G245800	C5	C5.enrich	TraesCS2D02G286300	C6	C6.enrich	bHLH	ERF
TraesCS7A02G245800	C5	C5.enrich	TraesCS3B02G505100	C6	C6.enrich	bHLH	B3
TraesCS7A02G245800	C5	C5.enrich	TraesCS6D02G225700	C6	C6.enrich	bHLH	ERF
TraesCS7A02G245800	C5	C5.enrich	TraesCS7A02G145800	C6	C6.enrich	bHLH	ERF
TraesCS7A02G245800	C5	C5.enrich	TraesCS3A02G149000	C6	C6.enrich	bHLH	ERF
TraesCS7A02G245800	C5	C5.enrich	TraesCS3D02G157100	C6	C6.enrich	bHLH	ERF
TraesCS7A02G245800	C5	C5.enrich	TraesCS4A02G193100	C6	C6.enrich	bHLH	ERF
TraesCS7A02G245800	C5	C5.enrich	TraesCS4B02G122100	C6	C6.enrich	bHLH	ERF
TraesCS7A02G245800	C5	C5.enrich	TraesCS6D02G049300	C6	C6.enrich	bHLH	C2H2
TraesCS7A02G245800	C5	C5.enrich	TraesCS4D02G120200	C6	C6.enrich	bHLH	ERF
TraesCS7A02G245800	C5	C5.enrich	TraesCS5B02G426600	C6	C6.enrich	bHLH	ERF
TraesCS7A02G245800	C5	C5.enrich	TraesCS5A02G424600	C6	C6.enrich	bHLH	ERF
TraesCS7A02G245800	C5	C5.enrich	TraesCS6B02G280800	C6	C6.enrich	bHLH	ERF
TraesCS7A02G263100	C5	C5.enrich	TraesCS2D02G286300	C6	C6.enrich	NAC	ERF
TraesCS7A02G263100	C5	C5.enrich	TraesCS6D02G049300	C6	C6.enrich	NAC	C2H2
TraesCS7A02G263100	C5	C5.enrich	TraesCS4D02G120200	C6	C6.enrich	NAC	ERF
TraesCS7A02G263100	C5	C5.enrich	TraesCS4A02G193100	C6	C6.enrich	NAC	ERF
TraesCS7A02G263100	C5	C5.enrich	TraesCS4B02G122100	C6	C6.enrich	NAC	ERF
TraesCS7A02G263100	C5	C5.enrich	TraesCS5A02G424600	C6	C6.enrich	NAC	ERF
TraesCS7A02G263100	C5	C5.enrich	TraesCS7A02G145800	C6	C6.enrich	NAC	ERF
TraesCS7A02G263100	C5	C5.enrich	TraesCS4D02G267500	C6	C6.enrich	NAC	ERF
TraesCS7A02G323000	C5	C5.enrich	TraesCS2D02G286300	C6	C6.enrich	bHLH	ERF
TraesCS7A02G323000	C5	C5.enrich	TraesCS5B02G426600	C6	C6.enrich	bHLH	ERF
TraesCS7A02G340300	C5	C5.enrich	TraesCS2D02G286300	C6	C6.enrich	bHLH	ERF
TraesCS7A02G340300	C5	C5.enrich	TraesCS3A02G149000	C6	C6.enrich	bHLH	ERF
TraesCS7A02G340300	C5	C5.enrich	TraesCS3D02G157100	C6	C6.enrich	bHLH	ERF
TraesCS7A02G340300	C5	C5.enrich	TraesCS4A02G193100	C6	C6.enrich	bHLH	ERF
TraesCS7A02G340300	C5	C5.enrich	TraesCS4B02G122100	C6	C6.enrich	bHLH	ERF
TraesCS7A02G340300	C5	C5.enrich	TraesCS4D02G120200	C6	C6.enrich	bHLH	ERF
TraesCS7A02G340300	C5	C5.enrich	TraesCS5B02G426600	C6	C6.enrich	bHLH	ERF
TraesCS7A02G340300	C5	C5.enrich	TraesCS5A02G424600	C6	C6.enrich	bHLH	ERF
TraesCS7A02G340300	C5	C5.enrich	TraesCS6B02G280800	C6	C6.enrich	bHLH	ERF
TraesCS7A02G340300	C5	C5.enrich	TraesCS7A02G145800	C6	C6.enrich	bHLH	ERF
TraesCS7A02G470100	C5	C5.enrich	TraesCS6B02G280800	C6	C6.enrich	G2-like	ERF
TraesCS7A02G470100	C5	C5.enrich	TraesCS5A02G424600	C6	C6.enrich	G2-like	ERF
TraesCS7A02G483100	C5	C5.enrich	TraesCS6B02G280800	C6	C6.enrich	G2-like	ERF
TraesCS7A02G483100	C5	C5.enrich	TraesCS5A02G424600	C6	C6.enrich	G2-like	ERF
TraesCS7A02G543300	C5	C5.enrich	TraesCS2D02G286300	C6	C6.enrich	bHLH	ERF
TraesCS7A02G543300	C5	C5.enrich	TraesCS1B02G071700	C6	C6.enrich	bHLH	C2H2
TraesCS7A02G543300	C5	C5.enrich	TraesCS1D02G055600	C6	C6.enrich	bHLH	C2H2
TraesCS7A02G543300	C5	C5.enrich	TraesCS3B02G505100	C6	C6.enrich	bHLH	B3
TraesCS7A02G543300	C5	C5.enrich	TraesCS4D02G120200	C6	C6.enrich	bHLH	ERF
TraesCS7A02G543300	C5	C5.enrich	TraesCS6D02G225700	C6	C6.enrich	bHLH	ERF
TraesCS7B02G048100	C5	C5.enrich	TraesCS1B02G071700	C6	C6.enrich	ERF	C2H2
TraesCS7B02G048100	C5	C5.enrich	TraesCS1D02G055600	C6	C6.enrich	ERF	C2H2
TraesCS7B02G048100	C5	C5.enrich	TraesCS4B02G101400	C6	C6.enrich	ERF	B3
TraesCS7B02G048100	C5	C5.enrich	TraesCS4B02G122100	C6	C6.enrich	ERF	ERF
TraesCS7B02G048100	C5	C5.enrich	TraesCS4D02G120200	C6	C6.enrich	ERF	ERF
TraesCS7B02G048100	C5	C5.enrich	TraesCS4D02G267500	C6	C6.enrich	ERF	ERF
TraesCS7B02G048100	C5	C5.enrich	TraesCS6B02G280800	C6	C6.enrich	ERF	ERF
TraesCS7B02G048100	C5	C5.enrich	TraesCS5A02G424600	C6	C6.enrich	ERF	ERF
TraesCS7B02G048100	C5	C5.enrich	TraesCS6D02G281200	C6	C6.enrich	ERF	ERF
TraesCS7B02G048100	C5	C5.enrich	TraesCS6D02G225700	C6	C6.enrich	ERF	ERF
TraesCS7B02G048100	C5	C5.enrich	TraesCS6A02G243500	C6	C6.enrich	ERF	ERF
TraesCS7B02G048100	C5	C5.enrich	TraesCS7A02G145800	C6	C6.enrich	ERF	ERF
TraesCS7B02G048100	C5	C5.enrich	TraesCS4B02G268100	C6	C6.enrich	ERF	ERF
TraesCS7B02G062200	C5	C5.enrich	TraesCS1B02G071700	C6	C6.enrich	ERF	C2H2
TraesCS7B02G062200	C5	C5.enrich	TraesCS1D02G055600	C6	C6.enrich	ERF	C2H2
TraesCS7B02G062200	C5	C5.enrich	TraesCS4B02G101400	C6	C6.enrich	ERF	B3
TraesCS7B02G062200	C5	C5.enrich	TraesCS4B02G122100	C6	C6.enrich	ERF	ERF
TraesCS7B02G062200	C5	C5.enrich	TraesCS4D02G120200	C6	C6.enrich	ERF	ERF
TraesCS7B02G062200	C5	C5.enrich	TraesCS4D02G267500	C6	C6.enrich	ERF	ERF
TraesCS7B02G062200	C5	C5.enrich	TraesCS6B02G280800	C6	C6.enrich	ERF	ERF
TraesCS7B02G062200	C5	C5.enrich	TraesCS5A02G424600	C6	C6.enrich	ERF	ERF
TraesCS7B02G062200	C5	C5.enrich	TraesCS6D02G281200	C6	C6.enrich	ERF	ERF
TraesCS7B02G062200	C5	C5.enrich	TraesCS6D02G225700	C6	C6.enrich	ERF	ERF
TraesCS7B02G062200	C5	C5.enrich	TraesCS6A02G243500	C6	C6.enrich	ERF	ERF
TraesCS7B02G062200	C5	C5.enrich	TraesCS7A02G145800	C6	C6.enrich	ERF	ERF
TraesCS7B02G062200	C5	C5.enrich	TraesCS4B02G268100	C6	C6.enrich	ERF	ERF
TraesCS7B02G160900	C5	C5.enrich	TraesCS2D02G286300	C6	C6.enrich	NAC	ERF
TraesCS7B02G160900	C5	C5.enrich	TraesCS6D02G049300	C6	C6.enrich	NAC	C2H2
TraesCS7B02G160900	C5	C5.enrich	TraesCS4D02G120200	C6	C6.enrich	NAC	ERF
TraesCS7B02G160900	C5	C5.enrich	TraesCS4A02G193100	C6	C6.enrich	NAC	ERF
TraesCS7B02G160900	C5	C5.enrich	TraesCS4B02G122100	C6	C6.enrich	NAC	ERF
TraesCS7B02G160900	C5	C5.enrich	TraesCS5A02G424600	C6	C6.enrich	NAC	ERF
TraesCS7B02G160900	C5	C5.enrich	TraesCS7A02G145800	C6	C6.enrich	NAC	ERF
TraesCS7B02G160900	C5	C5.enrich	TraesCS4D02G267500	C6	C6.enrich	NAC	ERF
TraesCS7B02G169900	C5	C5.enrich	TraesCS4B02G122100	C6	C6.enrich	MYB	ERF
TraesCS7B02G169900	C5	C5.enrich	TraesCS5B02G426600	C6	C6.enrich	MYB	ERF
TraesCS7B02G169900	C5	C5.enrich	TraesCS3A02G149000	C6	C6.enrich	MYB	ERF
TraesCS7B02G169900	C5	C5.enrich	TraesCS6D02G225700	C6	C6.enrich	MYB	ERF
TraesCS7B02G169900	C5	C5.enrich	TraesCS6B02G280800	C6	C6.enrich	MYB	ERF
TraesCS7B02G169900	C5	C5.enrich	TraesCS6D02G281200	C6	C6.enrich	MYB	ERF
TraesCS7B02G169900	C5	C5.enrich	TraesCS7A02G145800	C6	C6.enrich	MYB	ERF
TraesCS7B02G169900	C5	C5.enrich	TraesCS4D02G120200	C6	C6.enrich	MYB	ERF
TraesCS7B02G169900	C5	C5.enrich	TraesCS1D02G055600	C6	C6.enrich	MYB	C2H2
TraesCS7B02G223900	C5	C5.enrich	TraesCS2D02G286300	C6	C6.enrich	bHLH	ERF
TraesCS7B02G251900	C5	C5.enrich	TraesCS2D02G286300	C6	C6.enrich	bHLH	ERF
TraesCS7B02G251900	C5	C5.enrich	TraesCS3A02G149000	C6	C6.enrich	bHLH	ERF
TraesCS7B02G251900	C5	C5.enrich	TraesCS3D02G157100	C6	C6.enrich	bHLH	ERF
TraesCS7B02G251900	C5	C5.enrich	TraesCS4A02G193100	C6	C6.enrich	bHLH	ERF
TraesCS7B02G251900	C5	C5.enrich	TraesCS4B02G122100	C6	C6.enrich	bHLH	ERF
TraesCS7B02G251900	C5	C5.enrich	TraesCS4D02G120200	C6	C6.enrich	bHLH	ERF
TraesCS7B02G251900	C5	C5.enrich	TraesCS5B02G426600	C6	C6.enrich	bHLH	ERF
TraesCS7B02G251900	C5	C5.enrich	TraesCS5A02G424600	C6	C6.enrich	bHLH	ERF
TraesCS7B02G251900	C5	C5.enrich	TraesCS6B02G280800	C6	C6.enrich	bHLH	ERF
TraesCS7B02G251900	C5	C5.enrich	TraesCS7A02G145800	C6	C6.enrich	bHLH	ERF
TraesCS7B02G385700	C5	C5.enrich	TraesCS6B02G280800	C6	C6.enrich	G2-like	ERF
TraesCS7B02G385700	C5	C5.enrich	TraesCS5A02G424600	C6	C6.enrich	G2-like	ERF
TraesCS7B02G472600	C5	C5.enrich	TraesCS2D02G286300	C6	C6.enrich	NAC	ERF
TraesCS7B02G472600	C5	C5.enrich	TraesCS6D02G049300	C6	C6.enrich	NAC	C2H2
TraesCS7B02G472600	C5	C5.enrich	TraesCS4D02G120200	C6	C6.enrich	NAC	ERF
TraesCS7B02G472600	C5	C5.enrich	TraesCS4A02G193100	C6	C6.enrich	NAC	ERF
TraesCS7B02G472600	C5	C5.enrich	TraesCS4B02G122100	C6	C6.enrich	NAC	ERF
TraesCS7B02G472600	C5	C5.enrich	TraesCS5A02G424600	C6	C6.enrich	NAC	ERF
TraesCS7B02G472600	C5	C5.enrich	TraesCS7A02G145800	C6	C6.enrich	NAC	ERF
TraesCS7B02G472600	C5	C5.enrich	TraesCS4D02G267500	C6	C6.enrich	NAC	ERF
TraesCS7D02G120400	C5	C5.enrich	TraesCS4B02G122100	C6	C6.enrich	MYB	ERF
TraesCS7D02G120400	C5	C5.enrich	TraesCS5B02G426600	C6	C6.enrich	MYB	ERF
TraesCS7D02G120400	C5	C5.enrich	TraesCS3A02G149000	C6	C6.enrich	MYB	ERF
TraesCS7D02G120400	C5	C5.enrich	TraesCS6D02G225700	C6	C6.enrich	MYB	ERF
TraesCS7D02G120400	C5	C5.enrich	TraesCS6B02G280800	C6	C6.enrich	MYB	ERF
TraesCS7D02G120400	C5	C5.enrich	TraesCS6D02G281200	C6	C6.enrich	MYB	ERF
TraesCS7D02G120400	C5	C5.enrich	TraesCS7A02G145800	C6	C6.enrich	MYB	ERF
TraesCS7D02G120400	C5	C5.enrich	TraesCS4D02G120200	C6	C6.enrich	MYB	ERF
TraesCS7D02G120400	C5	C5.enrich	TraesCS1D02G055600	C6	C6.enrich	MYB	C2H2
TraesCS7D02G127600	C5	C5.enrich	TraesCS1B02G071700	C6	C6.enrich	ERF	C2H2
TraesCS7D02G127600	C5	C5.enrich	TraesCS1D02G055600	C6	C6.enrich	ERF	C2H2
TraesCS7D02G127600	C5	C5.enrich	TraesCS4B02G101400	C6	C6.enrich	ERF	B3
TraesCS7D02G127600	C5	C5.enrich	TraesCS4B02G122100	C6	C6.enrich	ERF	ERF
TraesCS7D02G127600	C5	C5.enrich	TraesCS4D02G120200	C6	C6.enrich	ERF	ERF
TraesCS7D02G127600	C5	C5.enrich	TraesCS4D02G267500	C6	C6.enrich	ERF	ERF
TraesCS7D02G127600	C5	C5.enrich	TraesCS6B02G280800	C6	C6.enrich	ERF	ERF
TraesCS7D02G127600	C5	C5.enrich	TraesCS5A02G424600	C6	C6.enrich	ERF	ERF
TraesCS7D02G127600	C5	C5.enrich	TraesCS6D02G281200	C6	C6.enrich	ERF	ERF
TraesCS7D02G127600	C5	C5.enrich	TraesCS6D02G225700	C6	C6.enrich	ERF	ERF
TraesCS7D02G127600	C5	C5.enrich	TraesCS6A02G243500	C6	C6.enrich	ERF	ERF
TraesCS7D02G127600	C5	C5.enrich	TraesCS7A02G145800	C6	C6.enrich	ERF	ERF
TraesCS7D02G127600	C5	C5.enrich	TraesCS4B02G268100	C6	C6.enrich	ERF	ERF
TraesCS7D02G158500	C5	C5.enrich	TraesCS1B02G071700	C6	C6.enrich	ERF	C2H2
TraesCS7D02G158500	C5	C5.enrich	TraesCS1D02G055600	C6	C6.enrich	ERF	C2H2
TraesCS7D02G158500	C5	C5.enrich	TraesCS4B02G101400	C6	C6.enrich	ERF	B3
TraesCS7D02G158500	C5	C5.enrich	TraesCS4B02G122100	C6	C6.enrich	ERF	ERF
TraesCS7D02G158500	C5	C5.enrich	TraesCS4D02G120200	C6	C6.enrich	ERF	ERF
TraesCS7D02G158500	C5	C5.enrich	TraesCS4D02G267500	C6	C6.enrich	ERF	ERF
TraesCS7D02G158500	C5	C5.enrich	TraesCS6B02G280800	C6	C6.enrich	ERF	ERF
TraesCS7D02G158500	C5	C5.enrich	TraesCS5A02G424600	C6	C6.enrich	ERF	ERF
TraesCS7D02G158500	C5	C5.enrich	TraesCS6D02G281200	C6	C6.enrich	ERF	ERF
TraesCS7D02G158500	C5	C5.enrich	TraesCS6D02G225700	C6	C6.enrich	ERF	ERF
TraesCS7D02G158500	C5	C5.enrich	TraesCS6A02G243500	C6	C6.enrich	ERF	ERF
TraesCS7D02G158500	C5	C5.enrich	TraesCS7A02G145800	C6	C6.enrich	ERF	ERF
TraesCS7D02G158500	C5	C5.enrich	TraesCS4B02G268100	C6	C6.enrich	ERF	ERF
TraesCS7D02G244300	C5	C5.enrich	TraesCS2D02G286300	C6	C6.enrich	bHLH	ERF
TraesCS7D02G244300	C5	C5.enrich	TraesCS3B02G505100	C6	C6.enrich	bHLH	B3
TraesCS7D02G244300	C5	C5.enrich	TraesCS6D02G225700	C6	C6.enrich	bHLH	ERF
TraesCS7D02G244300	C5	C5.enrich	TraesCS7A02G145800	C6	C6.enrich	bHLH	ERF
TraesCS7D02G244300	C5	C5.enrich	TraesCS3A02G149000	C6	C6.enrich	bHLH	ERF
TraesCS7D02G244300	C5	C5.enrich	TraesCS3D02G157100	C6	C6.enrich	bHLH	ERF
TraesCS7D02G244300	C5	C5.enrich	TraesCS4A02G193100	C6	C6.enrich	bHLH	ERF
TraesCS7D02G244300	C5	C5.enrich	TraesCS4B02G122100	C6	C6.enrich	bHLH	ERF
TraesCS7D02G244300	C5	C5.enrich	TraesCS6D02G049300	C6	C6.enrich	bHLH	C2H2
TraesCS7D02G244300	C5	C5.enrich	TraesCS4D02G120200	C6	C6.enrich	bHLH	ERF
TraesCS7D02G244300	C5	C5.enrich	TraesCS5B02G426600	C6	C6.enrich	bHLH	ERF
TraesCS7D02G244300	C5	C5.enrich	TraesCS5A02G424600	C6	C6.enrich	bHLH	ERF
TraesCS7D02G244300	C5	C5.enrich	TraesCS6B02G280800	C6	C6.enrich	bHLH	ERF
TraesCS7D02G263800	C5	C5.enrich	TraesCS2D02G286300	C6	C6.enrich	NAC	ERF
TraesCS7D02G263800	C5	C5.enrich	TraesCS6D02G049300	C6	C6.enrich	NAC	C2H2
TraesCS7D02G263800	C5	C5.enrich	TraesCS4D02G120200	C6	C6.enrich	NAC	ERF
TraesCS7D02G263800	C5	C5.enrich	TraesCS4A02G193100	C6	C6.enrich	NAC	ERF
TraesCS7D02G263800	C5	C5.enrich	TraesCS4B02G122100	C6	C6.enrich	NAC	ERF
TraesCS7D02G263800	C5	C5.enrich	TraesCS5A02G424600	C6	C6.enrich	NAC	ERF
TraesCS7D02G263800	C5	C5.enrich	TraesCS7A02G145800	C6	C6.enrich	NAC	ERF
TraesCS7D02G263800	C5	C5.enrich	TraesCS4D02G267500	C6	C6.enrich	NAC	ERF
TraesCS7D02G319600	C5	C5.enrich	TraesCS2D02G286300	C6	C6.enrich	bHLH	ERF
TraesCS7D02G319600	C5	C5.enrich	TraesCS5B02G426600	C6	C6.enrich	bHLH	ERF
TraesCS7D02G470000	C5	C5.enrich	TraesCS6B02G280800	C6	C6.enrich	G2-like	ERF
TraesCS7D02G470000	C5	C5.enrich	TraesCS5A02G424600	C6	C6.enrich	G2-like	ERF
TraesCS2D02G286300	C6	C6.enrich	TraesCS1A02G314200	C2	C2.enrich	ERF	ERF
TraesCS2D02G286300	C6	C6.enrich	TraesCS5B02G229000	C2	C2.enrich	ERF	bHLH
TraesCS2D02G286300	C6	C6.enrich	TraesCS6B02G201700	C2	C2.enrich	ERF	MYB
TraesCS2D02G286300	C6	C6.enrich	TraesCS6A02G173800	C2	C2.enrich	ERF	MYB
TraesCS2D02G286300	C6	C6.enrich	TraesCS6B02G263800	C2	C2.enrich	ERF	ERF
TraesCS2D02G286300	C6	C6.enrich	TraesCS7B02G443900	C2	C2.enrich	ERF	MYB
TraesCS2D02G286300	C6	C6.enrich	TraesCS1A02G284000	C2	C2.enrich	ERF	MYB
TraesCS2D02G286300	C6	C6.enrich	TraesCS3B02G156600	C2	C2.enrich	ERF	BES1
TraesCS2D02G286300	C6	C6.enrich	TraesCS4A02G035400	C2	C2.enrich	ERF	ERF
TraesCS2D02G286300	C6	C6.enrich	TraesCS6D02G162900	C2	C2.enrich	ERF	MYB
TraesCS2D02G286300	C6	C6.enrich	TraesCS5D02G406900	C2	C2.enrich	ERF	bHLH
TraesCS2D02G286300	C6	C6.enrich	TraesCS7A02G526600	C2	C2.enrich	ERF	MYB
TraesCS6D02G049300	C6	C6.enrich	TraesCS1A02G129300	C2	C2.enrich	C2H2	MYB
TraesCS6D02G049300	C6	C6.enrich	TraesCS1A02G284000	C2	C2.enrich	C2H2	MYB
TraesCS6D02G049300	C6	C6.enrich	TraesCS1A02G314200	C2	C2.enrich	C2H2	ERF
TraesCS6D02G049300	C6	C6.enrich	TraesCS2A02G116900	C2	C2.enrich	C2H2	ERF
TraesCS6D02G049300	C6	C6.enrich	TraesCS2B02G184500	C2	C2.enrich	C2H2	MYB
TraesCS6D02G049300	C6	C6.enrich	TraesCS3D02G161100	C2	C2.enrich	C2H2	MYB
TraesCS6D02G049300	C6	C6.enrich	TraesCS5B02G229000	C2	C2.enrich	C2H2	bHLH
TraesCS6D02G049300	C6	C6.enrich	TraesCS5D02G406900	C2	C2.enrich	C2H2	bHLH
TraesCS6D02G049300	C6	C6.enrich	TraesCS6A02G173800	C2	C2.enrich	C2H2	MYB
TraesCS6D02G049300	C6	C6.enrich	TraesCS6B02G201700	C2	C2.enrich	C2H2	MYB
TraesCS6D02G049300	C6	C6.enrich	TraesCS7A02G526600	C2	C2.enrich	C2H2	MYB
TraesCS4D02G120200	C6	C6.enrich	TraesCS1A02G314200	C2	C2.enrich	ERF	ERF
TraesCS4D02G120200	C6	C6.enrich	TraesCS5B02G229000	C2	C2.enrich	ERF	bHLH
TraesCS4D02G120200	C6	C6.enrich	TraesCS6B02G201700	C2	C2.enrich	ERF	MYB
TraesCS4D02G120200	C6	C6.enrich	TraesCS6A02G173800	C2	C2.enrich	ERF	MYB
TraesCS4D02G120200	C6	C6.enrich	TraesCS6B02G263800	C2	C2.enrich	ERF	ERF
TraesCS4D02G120200	C6	C6.enrich	TraesCS7B02G443900	C2	C2.enrich	ERF	MYB
TraesCS4D02G120200	C6	C6.enrich	TraesCS1A02G284000	C2	C2.enrich	ERF	MYB
TraesCS4D02G120200	C6	C6.enrich	TraesCS3B02G156600	C2	C2.enrich	ERF	BES1
TraesCS4D02G120200	C6	C6.enrich	TraesCS4A02G035400	C2	C2.enrich	ERF	ERF
TraesCS4D02G120200	C6	C6.enrich	TraesCS6D02G162900	C2	C2.enrich	ERF	MYB
TraesCS4D02G120200	C6	C6.enrich	TraesCS5D02G406900	C2	C2.enrich	ERF	bHLH
TraesCS4D02G120200	C6	C6.enrich	TraesCS7A02G526600	C2	C2.enrich	ERF	MYB
TraesCS4A02G193100	C6	C6.enrich	TraesCS1A02G314200	C2	C2.enrich	ERF	ERF
TraesCS4A02G193100	C6	C6.enrich	TraesCS6B02G201700	C2	C2.enrich	ERF	MYB
TraesCS4A02G193100	C6	C6.enrich	TraesCS6A02G173800	C2	C2.enrich	ERF	MYB
TraesCS4A02G193100	C6	C6.enrich	TraesCS6B02G263800	C2	C2.enrich	ERF	ERF
TraesCS4A02G193100	C6	C6.enrich	TraesCS7B02G443900	C2	C2.enrich	ERF	MYB
TraesCS4A02G193100	C6	C6.enrich	TraesCS5B02G229000	C2	C2.enrich	ERF	bHLH
TraesCS4A02G193100	C6	C6.enrich	TraesCS1A02G284000	C2	C2.enrich	ERF	MYB
TraesCS4A02G193100	C6	C6.enrich	TraesCS3B02G156600	C2	C2.enrich	ERF	BES1
TraesCS4A02G193100	C6	C6.enrich	TraesCS4A02G035400	C2	C2.enrich	ERF	ERF
TraesCS4A02G193100	C6	C6.enrich	TraesCS5D02G406900	C2	C2.enrich	ERF	bHLH
TraesCS4A02G193100	C6	C6.enrich	TraesCS7A02G526600	C2	C2.enrich	ERF	MYB
TraesCS4B02G122100	C6	C6.enrich	TraesCS1A02G314200	C2	C2.enrich	ERF	ERF
TraesCS4B02G122100	C6	C6.enrich	TraesCS6B02G201700	C2	C2.enrich	ERF	MYB
TraesCS4B02G122100	C6	C6.enrich	TraesCS6A02G173800	C2	C2.enrich	ERF	MYB
TraesCS4B02G122100	C6	C6.enrich	TraesCS6B02G263800	C2	C2.enrich	ERF	ERF
TraesCS4B02G122100	C6	C6.enrich	TraesCS7B02G443900	C2	C2.enrich	ERF	MYB
TraesCS4B02G122100	C6	C6.enrich	TraesCS5B02G229000	C2	C2.enrich	ERF	bHLH
TraesCS4B02G122100	C6	C6.enrich	TraesCS1A02G284000	C2	C2.enrich	ERF	MYB
TraesCS4B02G122100	C6	C6.enrich	TraesCS3B02G156600	C2	C2.enrich	ERF	BES1
TraesCS4B02G122100	C6	C6.enrich	TraesCS4A02G035400	C2	C2.enrich	ERF	ERF
TraesCS4B02G122100	C6	C6.enrich	TraesCS5D02G406900	C2	C2.enrich	ERF	bHLH
TraesCS4B02G122100	C6	C6.enrich	TraesCS7A02G526600	C2	C2.enrich	ERF	MYB
TraesCS5A02G424600	C6	C6.enrich	TraesCS5B02G229000	C2	C2.enrich	ERF	bHLH
TraesCS5A02G424600	C6	C6.enrich	TraesCS1A02G314200	C2	C2.enrich	ERF	ERF
TraesCS5A02G424600	C6	C6.enrich	TraesCS6B02G201700	C2	C2.enrich	ERF	MYB
TraesCS5A02G424600	C6	C6.enrich	TraesCS6A02G173800	C2	C2.enrich	ERF	MYB
TraesCS5A02G424600	C6	C6.enrich	TraesCS6B02G263800	C2	C2.enrich	ERF	ERF
TraesCS5A02G424600	C6	C6.enrich	TraesCS1A02G284000	C2	C2.enrich	ERF	MYB
TraesCS5A02G424600	C6	C6.enrich	TraesCS3B02G156600	C2	C2.enrich	ERF	BES1
TraesCS5A02G424600	C6	C6.enrich	TraesCS4A02G035400	C2	C2.enrich	ERF	ERF
TraesCS5A02G424600	C6	C6.enrich	TraesCS7B02G443900	C2	C2.enrich	ERF	MYB
TraesCS5A02G424600	C6	C6.enrich	TraesCS5D02G406900	C2	C2.enrich	ERF	bHLH
TraesCS5A02G424600	C6	C6.enrich	TraesCS7A02G526600	C2	C2.enrich	ERF	MYB
TraesCS7A02G145800	C6	C6.enrich	TraesCS1A02G314200	C2	C2.enrich	ERF	ERF
TraesCS7A02G145800	C6	C6.enrich	TraesCS5B02G229000	C2	C2.enrich	ERF	bHLH
TraesCS7A02G145800	C6	C6.enrich	TraesCS6B02G201700	C2	C2.enrich	ERF	MYB
TraesCS7A02G145800	C6	C6.enrich	TraesCS6A02G173800	C2	C2.enrich	ERF	MYB
TraesCS7A02G145800	C6	C6.enrich	TraesCS6B02G263800	C2	C2.enrich	ERF	ERF
TraesCS7A02G145800	C6	C6.enrich	TraesCS7B02G443900	C2	C2.enrich	ERF	MYB
TraesCS7A02G145800	C6	C6.enrich	TraesCS1A02G284000	C2	C2.enrich	ERF	MYB
TraesCS7A02G145800	C6	C6.enrich	TraesCS3B02G156600	C2	C2.enrich	ERF	BES1
TraesCS7A02G145800	C6	C6.enrich	TraesCS4A02G035400	C2	C2.enrich	ERF	ERF
TraesCS7A02G145800	C6	C6.enrich	TraesCS6D02G162900	C2	C2.enrich	ERF	MYB
TraesCS7A02G145800	C6	C6.enrich	TraesCS5D02G406900	C2	C2.enrich	ERF	bHLH
TraesCS7A02G145800	C6	C6.enrich	TraesCS7A02G526600	C2	C2.enrich	ERF	MYB
TraesCS4D02G267500	C6	C6.enrich	TraesCS1A02G314200	C2	C2.enrich	ERF	ERF
TraesCS4D02G267500	C6	C6.enrich	TraesCS5B02G229000	C2	C2.enrich	ERF	bHLH
TraesCS4D02G267500	C6	C6.enrich	TraesCS6B02G201700	C2	C2.enrich	ERF	MYB
TraesCS4D02G267500	C6	C6.enrich	TraesCS6A02G173800	C2	C2.enrich	ERF	MYB
TraesCS4D02G267500	C6	C6.enrich	TraesCS6B02G263800	C2	C2.enrich	ERF	ERF
TraesCS4D02G267500	C6	C6.enrich	TraesCS7B02G443900	C2	C2.enrich	ERF	MYB
TraesCS4D02G267500	C6	C6.enrich	TraesCS1A02G284000	C2	C2.enrich	ERF	MYB
TraesCS4D02G267500	C6	C6.enrich	TraesCS3B02G156600	C2	C2.enrich	ERF	BES1
TraesCS4D02G267500	C6	C6.enrich	TraesCS4A02G035400	C2	C2.enrich	ERF	ERF
TraesCS4D02G267500	C6	C6.enrich	TraesCS6D02G162900	C2	C2.enrich	ERF	MYB
TraesCS4D02G267500	C6	C6.enrich	TraesCS5D02G406900	C2	C2.enrich	ERF	bHLH
TraesCS4D02G267500	C6	C6.enrich	TraesCS7A02G526600	C2	C2.enrich	ERF	MYB
TraesCS1B02G071700	C6	C6.enrich	TraesCS1A02G129300	C2	C2.enrich	C2H2	MYB
TraesCS1B02G071700	C6	C6.enrich	TraesCS1A02G284000	C2	C2.enrich	C2H2	MYB
TraesCS1B02G071700	C6	C6.enrich	TraesCS1A02G314200	C2	C2.enrich	C2H2	ERF
TraesCS1B02G071700	C6	C6.enrich	TraesCS2A02G116900	C2	C2.enrich	C2H2	ERF
TraesCS1B02G071700	C6	C6.enrich	TraesCS2B02G184500	C2	C2.enrich	C2H2	MYB
TraesCS1B02G071700	C6	C6.enrich	TraesCS3D02G161100	C2	C2.enrich	C2H2	MYB
TraesCS1B02G071700	C6	C6.enrich	TraesCS5B02G229000	C2	C2.enrich	C2H2	bHLH
TraesCS1B02G071700	C6	C6.enrich	TraesCS5D02G406900	C2	C2.enrich	C2H2	bHLH
TraesCS1B02G071700	C6	C6.enrich	TraesCS6A02G173800	C2	C2.enrich	C2H2	MYB
TraesCS1B02G071700	C6	C6.enrich	TraesCS6B02G201700	C2	C2.enrich	C2H2	MYB
TraesCS1B02G071700	C6	C6.enrich	TraesCS7A02G526600	C2	C2.enrich	C2H2	MYB
TraesCS1D02G055600	C6	C6.enrich	TraesCS1A02G129300	C2	C2.enrich	C2H2	MYB
TraesCS1D02G055600	C6	C6.enrich	TraesCS1A02G284000	C2	C2.enrich	C2H2	MYB
TraesCS1D02G055600	C6	C6.enrich	TraesCS1A02G314200	C2	C2.enrich	C2H2	ERF
TraesCS1D02G055600	C6	C6.enrich	TraesCS2A02G116900	C2	C2.enrich	C2H2	ERF
TraesCS1D02G055600	C6	C6.enrich	TraesCS2B02G184500	C2	C2.enrich	C2H2	MYB
TraesCS1D02G055600	C6	C6.enrich	TraesCS3D02G161100	C2	C2.enrich	C2H2	MYB
TraesCS1D02G055600	C6	C6.enrich	TraesCS5B02G229000	C2	C2.enrich	C2H2	bHLH
TraesCS1D02G055600	C6	C6.enrich	TraesCS5D02G406900	C2	C2.enrich	C2H2	bHLH
TraesCS1D02G055600	C6	C6.enrich	TraesCS6A02G173800	C2	C2.enrich	C2H2	MYB
TraesCS1D02G055600	C6	C6.enrich	TraesCS6B02G201700	C2	C2.enrich	C2H2	MYB
TraesCS1D02G055600	C6	C6.enrich	TraesCS7A02G526600	C2	C2.enrich	C2H2	MYB
TraesCS4B02G101400	C6	C6.enrich	TraesCS6A02G173800	C2	C2.enrich	B3	MYB
TraesCS6B02G280800	C6	C6.enrich	TraesCS1A02G314200	C2	C2.enrich	ERF	ERF
TraesCS6B02G280800	C6	C6.enrich	TraesCS5B02G229000	C2	C2.enrich	ERF	bHLH
TraesCS6B02G280800	C6	C6.enrich	TraesCS6B02G201700	C2	C2.enrich	ERF	MYB
TraesCS6B02G280800	C6	C6.enrich	TraesCS6A02G173800	C2	C2.enrich	ERF	MYB
TraesCS6B02G280800	C6	C6.enrich	TraesCS6B02G263800	C2	C2.enrich	ERF	ERF
TraesCS6B02G280800	C6	C6.enrich	TraesCS7B02G443900	C2	C2.enrich	ERF	MYB
TraesCS6B02G280800	C6	C6.enrich	TraesCS1A02G284000	C2	C2.enrich	ERF	MYB
TraesCS6B02G280800	C6	C6.enrich	TraesCS3B02G156600	C2	C2.enrich	ERF	BES1
TraesCS6B02G280800	C6	C6.enrich	TraesCS4A02G035400	C2	C2.enrich	ERF	ERF
TraesCS6B02G280800	C6	C6.enrich	TraesCS6D02G162900	C2	C2.enrich	ERF	MYB
TraesCS6B02G280800	C6	C6.enrich	TraesCS5D02G406900	C2	C2.enrich	ERF	bHLH
TraesCS6B02G280800	C6	C6.enrich	TraesCS7A02G526600	C2	C2.enrich	ERF	MYB
TraesCS6D02G281200	C6	C6.enrich	TraesCS1A02G314200	C2	C2.enrich	ERF	ERF
TraesCS6D02G281200	C6	C6.enrich	TraesCS5B02G229000	C2	C2.enrich	ERF	bHLH
TraesCS6D02G281200	C6	C6.enrich	TraesCS6B02G201700	C2	C2.enrich	ERF	MYB
TraesCS6D02G281200	C6	C6.enrich	TraesCS6A02G173800	C2	C2.enrich	ERF	MYB
TraesCS6D02G281200	C6	C6.enrich	TraesCS6B02G263800	C2	C2.enrich	ERF	ERF
TraesCS6D02G281200	C6	C6.enrich	TraesCS7B02G443900	C2	C2.enrich	ERF	MYB
TraesCS6D02G281200	C6	C6.enrich	TraesCS1A02G284000	C2	C2.enrich	ERF	MYB
TraesCS6D02G281200	C6	C6.enrich	TraesCS3B02G156600	C2	C2.enrich	ERF	BES1
TraesCS6D02G281200	C6	C6.enrich	TraesCS4A02G035400	C2	C2.enrich	ERF	ERF
TraesCS6D02G281200	C6	C6.enrich	TraesCS6D02G162900	C2	C2.enrich	ERF	MYB
TraesCS6D02G281200	C6	C6.enrich	TraesCS5D02G406900	C2	C2.enrich	ERF	bHLH
TraesCS6D02G281200	C6	C6.enrich	TraesCS7A02G526600	C2	C2.enrich	ERF	MYB
TraesCS6D02G225700	C6	C6.enrich	TraesCS1A02G314200	C2	C2.enrich	ERF	ERF
TraesCS6D02G225700	C6	C6.enrich	TraesCS5B02G229000	C2	C2.enrich	ERF	bHLH
TraesCS6D02G225700	C6	C6.enrich	TraesCS6B02G201700	C2	C2.enrich	ERF	MYB
TraesCS6D02G225700	C6	C6.enrich	TraesCS6A02G173800	C2	C2.enrich	ERF	MYB
TraesCS6D02G225700	C6	C6.enrich	TraesCS6B02G263800	C2	C2.enrich	ERF	ERF
TraesCS6D02G225700	C6	C6.enrich	TraesCS7B02G443900	C2	C2.enrich	ERF	MYB
TraesCS6D02G225700	C6	C6.enrich	TraesCS1A02G284000	C2	C2.enrich	ERF	MYB
TraesCS6D02G225700	C6	C6.enrich	TraesCS3B02G156600	C2	C2.enrich	ERF	BES1
TraesCS6D02G225700	C6	C6.enrich	TraesCS4A02G035400	C2	C2.enrich	ERF	ERF
TraesCS6D02G225700	C6	C6.enrich	TraesCS6D02G162900	C2	C2.enrich	ERF	MYB
TraesCS6D02G225700	C6	C6.enrich	TraesCS5D02G406900	C2	C2.enrich	ERF	bHLH
TraesCS6D02G225700	C6	C6.enrich	TraesCS7A02G526600	C2	C2.enrich	ERF	MYB
TraesCS6A02G243500	C6	C6.enrich	TraesCS1A02G314200	C2	C2.enrich	ERF	ERF
TraesCS6A02G243500	C6	C6.enrich	TraesCS5B02G229000	C2	C2.enrich	ERF	bHLH
TraesCS6A02G243500	C6	C6.enrich	TraesCS6B02G201700	C2	C2.enrich	ERF	MYB
TraesCS6A02G243500	C6	C6.enrich	TraesCS6A02G173800	C2	C2.enrich	ERF	MYB
TraesCS6A02G243500	C6	C6.enrich	TraesCS6B02G263800	C2	C2.enrich	ERF	ERF
TraesCS6A02G243500	C6	C6.enrich	TraesCS7B02G443900	C2	C2.enrich	ERF	MYB
TraesCS6A02G243500	C6	C6.enrich	TraesCS1A02G284000	C2	C2.enrich	ERF	MYB
TraesCS6A02G243500	C6	C6.enrich	TraesCS3B02G156600	C2	C2.enrich	ERF	BES1
TraesCS6A02G243500	C6	C6.enrich	TraesCS4A02G035400	C2	C2.enrich	ERF	ERF
TraesCS6A02G243500	C6	C6.enrich	TraesCS6D02G162900	C2	C2.enrich	ERF	MYB
TraesCS6A02G243500	C6	C6.enrich	TraesCS5D02G406900	C2	C2.enrich	ERF	bHLH
TraesCS6A02G243500	C6	C6.enrich	TraesCS7A02G526600	C2	C2.enrich	ERF	MYB
TraesCS4B02G268100	C6	C6.enrich	TraesCS1A02G314200	C2	C2.enrich	ERF	ERF
TraesCS4B02G268100	C6	C6.enrich	TraesCS5B02G229000	C2	C2.enrich	ERF	bHLH
TraesCS4B02G268100	C6	C6.enrich	TraesCS6B02G201700	C2	C2.enrich	ERF	MYB
TraesCS4B02G268100	C6	C6.enrich	TraesCS6A02G173800	C2	C2.enrich	ERF	MYB
TraesCS4B02G268100	C6	C6.enrich	TraesCS6B02G263800	C2	C2.enrich	ERF	ERF
TraesCS4B02G268100	C6	C6.enrich	TraesCS7B02G443900	C2	C2.enrich	ERF	MYB
TraesCS4B02G268100	C6	C6.enrich	TraesCS1A02G284000	C2	C2.enrich	ERF	MYB
TraesCS4B02G268100	C6	C6.enrich	TraesCS3B02G156600	C2	C2.enrich	ERF	BES1
TraesCS4B02G268100	C6	C6.enrich	TraesCS4A02G035400	C2	C2.enrich	ERF	ERF
TraesCS4B02G268100	C6	C6.enrich	TraesCS6D02G162900	C2	C2.enrich	ERF	MYB
TraesCS4B02G268100	C6	C6.enrich	TraesCS5D02G406900	C2	C2.enrich	ERF	bHLH
TraesCS4B02G268100	C6	C6.enrich	TraesCS7A02G526600	C2	C2.enrich	ERF	MYB
TraesCS3B02G505100	C6	C6.enrich	TraesCS6A02G173800	C2	C2.enrich	B3	MYB
TraesCS3A02G149000	C6	C6.enrich	TraesCS1A02G314200	C2	C2.enrich	ERF	ERF
TraesCS3A02G149000	C6	C6.enrich	TraesCS5B02G229000	C2	C2.enrich	ERF	bHLH
TraesCS3A02G149000	C6	C6.enrich	TraesCS6B02G201700	C2	C2.enrich	ERF	MYB
TraesCS3A02G149000	C6	C6.enrich	TraesCS6A02G173800	C2	C2.enrich	ERF	MYB
TraesCS3A02G149000	C6	C6.enrich	TraesCS6B02G263800	C2	C2.enrich	ERF	ERF
TraesCS3A02G149000	C6	C6.enrich	TraesCS7B02G443900	C2	C2.enrich	ERF	MYB
TraesCS3A02G149000	C6	C6.enrich	TraesCS1A02G284000	C2	C2.enrich	ERF	MYB
TraesCS3A02G149000	C6	C6.enrich	TraesCS3B02G156600	C2	C2.enrich	ERF	BES1
TraesCS3A02G149000	C6	C6.enrich	TraesCS4A02G035400	C2	C2.enrich	ERF	ERF
TraesCS3A02G149000	C6	C6.enrich	TraesCS6D02G162900	C2	C2.enrich	ERF	MYB
TraesCS3A02G149000	C6	C6.enrich	TraesCS5D02G406900	C2	C2.enrich	ERF	bHLH
TraesCS3A02G149000	C6	C6.enrich	TraesCS7A02G526600	C2	C2.enrich	ERF	MYB
TraesCS3D02G157100	C6	C6.enrich	TraesCS1A02G314200	C2	C2.enrich	ERF	ERF
TraesCS3D02G157100	C6	C6.enrich	TraesCS5B02G229000	C2	C2.enrich	ERF	bHLH
TraesCS3D02G157100	C6	C6.enrich	TraesCS6B02G201700	C2	C2.enrich	ERF	MYB
TraesCS3D02G157100	C6	C6.enrich	TraesCS6A02G173800	C2	C2.enrich	ERF	MYB
TraesCS3D02G157100	C6	C6.enrich	TraesCS6B02G263800	C2	C2.enrich	ERF	ERF
TraesCS3D02G157100	C6	C6.enrich	TraesCS7B02G443900	C2	C2.enrich	ERF	MYB
TraesCS3D02G157100	C6	C6.enrich	TraesCS1A02G284000	C2	C2.enrich	ERF	MYB
TraesCS3D02G157100	C6	C6.enrich	TraesCS3B02G156600	C2	C2.enrich	ERF	BES1
TraesCS3D02G157100	C6	C6.enrich	TraesCS4A02G035400	C2	C2.enrich	ERF	ERF
TraesCS3D02G157100	C6	C6.enrich	TraesCS6D02G162900	C2	C2.enrich	ERF	MYB
TraesCS3D02G157100	C6	C6.enrich	TraesCS5D02G406900	C2	C2.enrich	ERF	bHLH
TraesCS3D02G157100	C6	C6.enrich	TraesCS7A02G526600	C2	C2.enrich	ERF	MYB
TraesCS5B02G426600	C6	C6.enrich	TraesCS5B02G229000	C2	C2.enrich	ERF	bHLH
TraesCS5B02G426600	C6	C6.enrich	TraesCS1A02G314200	C2	C2.enrich	ERF	ERF
TraesCS5B02G426600	C6	C6.enrich	TraesCS6B02G201700	C2	C2.enrich	ERF	MYB
TraesCS5B02G426600	C6	C6.enrich	TraesCS6A02G173800	C2	C2.enrich	ERF	MYB
TraesCS5B02G426600	C6	C6.enrich	TraesCS6B02G263800	C2	C2.enrich	ERF	ERF
TraesCS5B02G426600	C6	C6.enrich	TraesCS1A02G284000	C2	C2.enrich	ERF	MYB
TraesCS5B02G426600	C6	C6.enrich	TraesCS3B02G156600	C2	C2.enrich	ERF	BES1
TraesCS5B02G426600	C6	C6.enrich	TraesCS4A02G035400	C2	C2.enrich	ERF	ERF
TraesCS5B02G426600	C6	C6.enrich	TraesCS7B02G443900	C2	C2.enrich	ERF	MYB
TraesCS5B02G426600	C6	C6.enrich	TraesCS5D02G406900	C2	C2.enrich	ERF	bHLH
TraesCS5B02G426600	C6	C6.enrich	TraesCS7A02G526600	C2	C2.enrich	ERF	MYB
TraesCS2A02G288000	C6	C6.enrich	TraesCS1A02G314200	C2	C2.enrich	ERF	ERF
TraesCS2A02G288000	C6	C6.enrich	TraesCS5B02G229000	C2	C2.enrich	ERF	bHLH
TraesCS2A02G288000	C6	C6.enrich	TraesCS6B02G201700	C2	C2.enrich	ERF	MYB
TraesCS2A02G288000	C6	C6.enrich	TraesCS6A02G173800	C2	C2.enrich	ERF	MYB
TraesCS2A02G288000	C6	C6.enrich	TraesCS6B02G263800	C2	C2.enrich	ERF	ERF
TraesCS2A02G288000	C6	C6.enrich	TraesCS7B02G443900	C2	C2.enrich	ERF	MYB
TraesCS2A02G288000	C6	C6.enrich	TraesCS1A02G284000	C2	C2.enrich	ERF	MYB
TraesCS2A02G288000	C6	C6.enrich	TraesCS3B02G156600	C2	C2.enrich	ERF	BES1
TraesCS2A02G288000	C6	C6.enrich	TraesCS4A02G035400	C2	C2.enrich	ERF	ERF
TraesCS2A02G288000	C6	C6.enrich	TraesCS6D02G162900	C2	C2.enrich	ERF	MYB
TraesCS2A02G288000	C6	C6.enrich	TraesCS5D02G406900	C2	C2.enrich	ERF	bHLH
TraesCS2A02G288000	C6	C6.enrich	TraesCS7A02G526600	C2	C2.enrich	ERF	MYB
TraesCS1A02G314200	C2	C2.enrich	TraesCS1A02G309200	C3	C3.enrich	ERF	G2-like
TraesCS1A02G314200	C2	C2.enrich	TraesCS1D02G429900	C3	C3.enrich	ERF	WRKY
TraesCS1A02G314200	C2	C2.enrich	TraesCS2A02G488200	C3	C3.enrich	ERF	G2-like
TraesCS1A02G314200	C2	C2.enrich	TraesCS2B02G459800	C3	C3.enrich	ERF	G2-like
TraesCS1A02G314200	C2	C2.enrich	TraesCS5B02G486900	C3	C3.enrich	ERF	AP2
TraesCS1A02G314200	C2	C2.enrich	TraesCS6A02G292300	C3	C3.enrich	ERF	MIKC_MADS
TraesCS1A02G314200	C2	C2.enrich	TraesCS1A02G264300	C3	C3.enrich	ERF	MIKC_MADS
TraesCS1A02G314200	C2	C2.enrich	TraesCS1D02G197300	C3	C3.enrich	ERF	HD-ZIP
TraesCS1A02G314200	C2	C2.enrich	TraesCS2B02G344000	C3	C3.enrich	ERF	MIKC_MADS
TraesCS1A02G314200	C2	C2.enrich	TraesCS3A02G312800	C3	C3.enrich	ERF	HD-ZIP
TraesCS1A02G314200	C2	C2.enrich	TraesCS3B02G497200	C3	C3.enrich	ERF	C2H2
TraesCS1A02G314200	C2	C2.enrich	TraesCS4B02G084700	C3	C3.enrich	ERF	HD-ZIP
TraesCS1A02G314200	C2	C2.enrich	TraesCS5B02G290200	C3	C3.enrich	ERF	NAC
TraesCS1A02G314200	C2	C2.enrich	TraesCS6A02G208900	C3	C3.enrich	ERF	NAC
TraesCS1A02G314200	C2	C2.enrich	TraesCS6B02G322700	C3	C3.enrich	ERF	MIKC_MADS
TraesCS1A02G314200	C2	C2.enrich	TraesCS6B02G012800	C3	C3.enrich	ERF	G2-like
TraesCS1A02G314200	C2	C2.enrich	TraesCS1A02G193400	C3	C3.enrich	ERF	HD-ZIP
TraesCS1A02G314200	C2	C2.enrich	TraesCS2B02G542400	C3	C3.enrich	ERF	AP2
TraesCS1A02G314200	C2	C2.enrich	TraesCS1D02G059200	C3	C3.enrich	ERF	AP2
TraesCS1A02G314200	C2	C2.enrich	TraesCS2B02G280300	C3	C3.enrich	ERF	WRKY
TraesCS1A02G314200	C2	C2.enrich	TraesCS2B02G378100	C3	C3.enrich	ERF	AP2
TraesCS1A02G314200	C2	C2.enrich	TraesCS5A02G250600	C3	C3.enrich	ERF	bHLH
TraesCS1A02G314200	C2	C2.enrich	TraesCS5B02G317400	C3	C3.enrich	ERF	HD-ZIP
TraesCS1A02G314200	C2	C2.enrich	TraesCS4B02G385200	C3	C3.enrich	ERF	HD-ZIP
TraesCS1A02G314200	C2	C2.enrich	TraesCS6A02G324500	C3	C3.enrich	ERF	HD-ZIP
TraesCS1A02G314200	C2	C2.enrich	TraesCS4B02G079000	C3	C3.enrich	ERF	C2H2
TraesCS1A02G314200	C2	C2.enrich	TraesCS5B02G054200	C3	C3.enrich	ERF	NAC
TraesCS1A02G314200	C2	C2.enrich	TraesCS6B02G269700	C3	C3.enrich	ERF	HD-ZIP
TraesCS1A02G314200	C2	C2.enrich	TraesCS6D02G237000	C3	C3.enrich	ERF	HD-ZIP
TraesCS1A02G314200	C2	C2.enrich	TraesCS1D02G429800	C3	C3.enrich	ERF	WRKY
TraesCS1A02G314200	C2	C2.enrich	TraesCS2B02G376900	C3	C3.enrich	ERF	NAC
TraesCS1A02G314200	C2	C2.enrich	TraesCS3D02G245500	C3	C3.enrich	ERF	NAC
TraesCS1A02G314200	C2	C2.enrich	TraesCS6A02G007300	C3	C3.enrich	ERF	G2-like
TraesCS1A02G314200	C2	C2.enrich	TraesCS7B02G401400	C3	C3.enrich	ERF	AP2
TraesCS1A02G314200	C2	C2.enrich	TraesCS3B02G457400	C3	C3.enrich	ERF	bHLH
TraesCS1A02G314200	C2	C2.enrich	TraesCS5D02G283200	C3	C3.enrich	ERF	NAC
TraesCS1A02G314200	C2	C2.enrich	TraesCS5D02G422300	C3	C3.enrich	ERF	GRAS
TraesCS1A02G314200	C2	C2.enrich	TraesCS5A02G481300	C3	C3.enrich	ERF	GRAS
TraesCS1A02G314200	C2	C2.enrich	TraesCS5B02G278600	C3	C3.enrich	ERF	bHLH
TraesCS1A02G314200	C2	C2.enrich	TraesCS5D02G286300	C3	C3.enrich	ERF	bHLH
TraesCS1A02G314200	C2	C2.enrich	TraesCS2B02G277300	C3	C3.enrich	ERF	G2-like
TraesCS1A02G314200	C2	C2.enrich	TraesCS2D02G262100	C3	C3.enrich	ERF	WRKY
TraesCS1A02G314200	C2	C2.enrich	TraesCS4D02G303500	C3	C3.enrich	ERF	HD-ZIP
TraesCS1A02G314200	C2	C2.enrich	TraesCS3B02G318300	C3	C3.enrich	ERF	MIKC_MADS
TraesCS1A02G314200	C2	C2.enrich	TraesCS6B02G411300	C3	C3.enrich	ERF	bHLH
TraesCS1A02G314200	C2	C2.enrich	TraesCS2A02G261900	C3	C3.enrich	ERF	WRKY
TraesCS1A02G314200	C2	C2.enrich	TraesCS6D02G011600	C3	C3.enrich	ERF	G2-like
TraesCS1A02G314200	C2	C2.enrich	TraesCS3B02G273600	C3	C3.enrich	ERF	NAC
TraesCS1A02G314200	C2	C2.enrich	TraesCS2D02G309800	C3	C3.enrich	ERF	NAC
TraesCS1A02G314200	C2	C2.enrich	TraesCS2D02G324700	C3	C3.enrich	ERF	NAC
TraesCS1A02G314200	C2	C2.enrich	TraesCS4A02G255800	C3	C3.enrich	ERF	bHLH
TraesCS1A02G314200	C2	C2.enrich	TraesCS5A02G279200	C3	C3.enrich	ERF	bHLH
TraesCS1A02G314200	C2	C2.enrich	TraesCS5A02G275900	C3	C3.enrich	ERF	NAC
TraesCS1A02G314200	C2	C2.enrich	TraesCS7D02G294400	C3	C3.enrich	ERF	G2-like
TraesCS1A02G314200	C2	C2.enrich	TraesCS7D02G451700	C3	C3.enrich	ERF	NAC
TraesCS1A02G314200	C2	C2.enrich	TraesCS4D02G178400	C3	C3.enrich	ERF	WRKY
TraesCS1A02G314200	C2	C2.enrich	TraesCS5A02G291200	C3	C3.enrich	ERF	NAC
TraesCS1A02G314200	C2	C2.enrich	TraesCS2A02G311500	C3	C3.enrich	ERF	NAC
TraesCS1A02G314200	C2	C2.enrich	TraesCS4B02G174000	C3	C3.enrich	ERF	NAC
TraesCS5B02G229000	C2	C2.enrich	TraesCS1D02G429800	C3	C3.enrich	bHLH	WRKY
TraesCS5B02G229000	C2	C2.enrich	TraesCS2A02G101900	C3	C3.enrich	bHLH	NAC
TraesCS5B02G229000	C2	C2.enrich	TraesCS4B02G176700	C3	C3.enrich	bHLH	WRKY
TraesCS5B02G229000	C2	C2.enrich	TraesCS4D02G178400	C3	C3.enrich	bHLH	WRKY
TraesCS5B02G229000	C2	C2.enrich	TraesCS5A02G291200	C3	C3.enrich	bHLH	NAC
TraesCS5B02G229000	C2	C2.enrich	TraesCS5D02G298600	C3	C3.enrich	bHLH	NAC
TraesCS5B02G229000	C2	C2.enrich	TraesCS6A02G292300	C3	C3.enrich	bHLH	MIKC_MADS
TraesCS5B02G229000	C2	C2.enrich	TraesCS2B02G280300	C3	C3.enrich	bHLH	WRKY
TraesCS5B02G229000	C2	C2.enrich	TraesCS2D02G262100	C3	C3.enrich	bHLH	WRKY
TraesCS5B02G229000	C2	C2.enrich	TraesCS1D02G429900	C3	C3.enrich	bHLH	WRKY
TraesCS5B02G229000	C2	C2.enrich	TraesCS3A02G312800	C3	C3.enrich	bHLH	HD-ZIP
TraesCS5B02G229000	C2	C2.enrich	TraesCS3D02G281900	C3	C3.enrich	bHLH	WRKY
TraesCS5B02G229000	C2	C2.enrich	TraesCS6A02G324500	C3	C3.enrich	bHLH	HD-ZIP
TraesCS5B02G229000	C2	C2.enrich	TraesCS1A02G193400	C3	C3.enrich	bHLH	HD-ZIP
TraesCS5B02G229000	C2	C2.enrich	TraesCS1D02G197300	C3	C3.enrich	bHLH	HD-ZIP
TraesCS5B02G229000	C2	C2.enrich	TraesCS2B02G542400	C3	C3.enrich	bHLH	AP2
TraesCS5B02G229000	C2	C2.enrich	TraesCS4B02G079000	C3	C3.enrich	bHLH	C2H2
TraesCS5B02G229000	C2	C2.enrich	TraesCS5D02G449200	C3	C3.enrich	bHLH	bHLH
TraesCS5B02G229000	C2	C2.enrich	TraesCS6B02G269700	C3	C3.enrich	bHLH	HD-ZIP
TraesCS5B02G229000	C2	C2.enrich	TraesCS1A02G058400	C3	C3.enrich	bHLH	AP2
TraesCS5B02G229000	C2	C2.enrich	TraesCS2B02G344000	C3	C3.enrich	bHLH	MIKC_MADS
TraesCS5B02G229000	C2	C2.enrich	TraesCS5D02G323100	C3	C3.enrich	bHLH	HD-ZIP
TraesCS5B02G229000	C2	C2.enrich	TraesCS2B02G376900	C3	C3.enrich	bHLH	NAC
TraesCS5B02G229000	C2	C2.enrich	TraesCS3B02G273600	C3	C3.enrich	bHLH	NAC
TraesCS5B02G229000	C2	C2.enrich	TraesCS7B02G401400	C3	C3.enrich	bHLH	AP2
TraesCS6B02G201700	C2	C2.enrich	TraesCS1A02G309200	C3	C3.enrich	MYB	G2-like
TraesCS6B02G201700	C2	C2.enrich	TraesCS1D02G429800	C3	C3.enrich	MYB	WRKY
TraesCS6B02G201700	C2	C2.enrich	TraesCS1D02G429900	C3	C3.enrich	MYB	WRKY
TraesCS6B02G201700	C2	C2.enrich	TraesCS3A02G312800	C3	C3.enrich	MYB	HD-ZIP
TraesCS6B02G201700	C2	C2.enrich	TraesCS3B02G410500	C3	C3.enrich	MYB	NAC
TraesCS6B02G201700	C2	C2.enrich	TraesCS4D02G243700	C3	C3.enrich	MYB	MIKC_MADS
TraesCS6B02G201700	C2	C2.enrich	TraesCS5A02G144000	C3	C3.enrich	MYB	GRAS
TraesCS6B02G201700	C2	C2.enrich	TraesCS6A02G007300	C3	C3.enrich	MYB	G2-like
TraesCS6B02G201700	C2	C2.enrich	TraesCS6B02G012800	C3	C3.enrich	MYB	G2-like
TraesCS6B02G201700	C2	C2.enrich	TraesCS1A02G193400	C3	C3.enrich	MYB	HD-ZIP
TraesCS6B02G201700	C2	C2.enrich	TraesCS6A02G011700	C3	C3.enrich	MYB	MIKC_MADS
TraesCS6B02G201700	C2	C2.enrich	TraesCS2A02G101900	C3	C3.enrich	MYB	NAC
TraesCS6B02G201700	C2	C2.enrich	TraesCS5B02G290200	C3	C3.enrich	MYB	NAC
TraesCS6B02G201700	C2	C2.enrich	TraesCS7D02G452500	C3	C3.enrich	MYB	NAC
TraesCS6B02G201700	C2	C2.enrich	TraesCS2B02G277300	C3	C3.enrich	MYB	G2-like
TraesCS6B02G201700	C2	C2.enrich	TraesCS3A02G245900	C3	C3.enrich	MYB	NAC
TraesCS6B02G201700	C2	C2.enrich	TraesCS4B02G385200	C3	C3.enrich	MYB	HD-ZIP
TraesCS6B02G201700	C2	C2.enrich	TraesCS6D02G011600	C3	C3.enrich	MYB	G2-like
TraesCS6B02G201700	C2	C2.enrich	TraesCS2A02G101400	C3	C3.enrich	MYB	NAC
TraesCS6B02G201700	C2	C2.enrich	TraesCS7D02G294400	C3	C3.enrich	MYB	G2-like
TraesCS6B02G201700	C2	C2.enrich	TraesCS5A02G441900	C3	C3.enrich	MYB	bHLH
TraesCS6B02G201700	C2	C2.enrich	TraesCS5B02G445900	C3	C3.enrich	MYB	bHLH
TraesCS6B02G201700	C2	C2.enrich	TraesCS5D02G258300	C3	C3.enrich	MYB	bHLH
TraesCS6B02G201700	C2	C2.enrich	TraesCS5D02G449200	C3	C3.enrich	MYB	bHLH
TraesCS6B02G201700	C2	C2.enrich	TraesCS5B02G141400	C3	C3.enrich	MYB	ZF-HD
TraesCS6B02G201700	C2	C2.enrich	TraesCS5D02G149400	C3	C3.enrich	MYB	ZF-HD
TraesCS6B02G201700	C2	C2.enrich	TraesCS6B02G322700	C3	C3.enrich	MYB	MIKC_MADS
TraesCS6B02G201700	C2	C2.enrich	TraesCS2D02G262100	C3	C3.enrich	MYB	WRKY
TraesCS6B02G201700	C2	C2.enrich	TraesCS4D02G178400	C3	C3.enrich	MYB	WRKY
TraesCS6B02G201700	C2	C2.enrich	TraesCS3B02G318300	C3	C3.enrich	MYB	MIKC_MADS
TraesCS6B02G201700	C2	C2.enrich	TraesCS2A02G311500	C3	C3.enrich	MYB	NAC
TraesCS6B02G201700	C2	C2.enrich	TraesCS4B02G079000	C3	C3.enrich	MYB	C2H2
TraesCS6B02G201700	C2	C2.enrich	TraesCS7B02G401400	C3	C3.enrich	MYB	AP2
TraesCS6B02G201700	C2	C2.enrich	TraesCS4A02G128100	C3	C3.enrich	MYB	WRKY
TraesCS6B02G201700	C2	C2.enrich	TraesCS2A02G338300	C3	C3.enrich	MYB	NAC
TraesCS6B02G201700	C2	C2.enrich	TraesCS2B02G542400	C3	C3.enrich	MYB	AP2
TraesCS6B02G201700	C2	C2.enrich	TraesCS6B02G269700	C3	C3.enrich	MYB	HD-ZIP
TraesCS6B02G201700	C2	C2.enrich	TraesCS6D02G273500	C3	C3.enrich	MYB	MIKC_MADS
TraesCS6B02G201700	C2	C2.enrich	TraesCS6B02G416300	C3	C3.enrich	MYB	NAC
TraesCS6B02G201700	C2	C2.enrich	TraesCS7D02G451700	C3	C3.enrich	MYB	NAC
TraesCS6B02G201700	C2	C2.enrich	TraesCS2B02G280300	C3	C3.enrich	MYB	WRKY
TraesCS6B02G201700	C2	C2.enrich	TraesCS2B02G376900	C3	C3.enrich	MYB	NAC
TraesCS6B02G201700	C2	C2.enrich	TraesCS6D02G237000	C3	C3.enrich	MYB	HD-ZIP
TraesCS6B02G201700	C2	C2.enrich	TraesCS3B02G273600	C3	C3.enrich	MYB	NAC
TraesCS6B02G201700	C2	C2.enrich	TraesCS2A02G488200	C3	C3.enrich	MYB	G2-like
TraesCS6B02G201700	C2	C2.enrich	TraesCS5B02G054200	C3	C3.enrich	MYB	NAC
TraesCS6B02G201700	C2	C2.enrich	TraesCS5A02G373100	C3	C3.enrich	MYB	WRKY
TraesCS6B02G201700	C2	C2.enrich	TraesCS1A02G264300	C3	C3.enrich	MYB	MIKC_MADS
TraesCS6B02G201700	C2	C2.enrich	TraesCS3B02G315600	C3	C3.enrich	MYB	WRKY
TraesCS6B02G201700	C2	C2.enrich	TraesCS3B02G457400	C3	C3.enrich	MYB	bHLH
TraesCS6B02G201700	C2	C2.enrich	TraesCS3D02G281900	C3	C3.enrich	MYB	WRKY
TraesCS6B02G201700	C2	C2.enrich	TraesCS5D02G283200	C3	C3.enrich	MYB	NAC
TraesCS6B02G201700	C2	C2.enrich	TraesCS5D02G286300	C3	C3.enrich	MYB	bHLH
TraesCS6B02G201700	C2	C2.enrich	TraesCS3D02G245500	C3	C3.enrich	MYB	NAC
TraesCS6B02G201700	C2	C2.enrich	TraesCS5A02G291200	C3	C3.enrich	MYB	NAC
TraesCS6B02G201700	C2	C2.enrich	TraesCS2A02G514200	C3	C3.enrich	MYB	AP2
TraesCS6B02G201700	C2	C2.enrich	TraesCS2B02G459800	C3	C3.enrich	MYB	G2-like
TraesCS6B02G201700	C2	C2.enrich	TraesCS5A02G250600	C3	C3.enrich	MYB	bHLH
TraesCS6B02G201700	C2	C2.enrich	TraesCS5A02G481300	C3	C3.enrich	MYB	GRAS
TraesCS6B02G201700	C2	C2.enrich	TraesCS2A02G261900	C3	C3.enrich	MYB	WRKY
TraesCS6B02G201700	C2	C2.enrich	TraesCS5A02G316800	C3	C3.enrich	MYB	HD-ZIP
TraesCS6A02G173800	C2	C2.enrich	TraesCS1A02G309200	C3	C3.enrich	MYB	G2-like
TraesCS6A02G173800	C2	C2.enrich	TraesCS1D02G429800	C3	C3.enrich	MYB	WRKY
TraesCS6A02G173800	C2	C2.enrich	TraesCS1D02G429900	C3	C3.enrich	MYB	WRKY
TraesCS6A02G173800	C2	C2.enrich	TraesCS3A02G312800	C3	C3.enrich	MYB	HD-ZIP
TraesCS6A02G173800	C2	C2.enrich	TraesCS3B02G410500	C3	C3.enrich	MYB	NAC
TraesCS6A02G173800	C2	C2.enrich	TraesCS4D02G243700	C3	C3.enrich	MYB	MIKC_MADS
TraesCS6A02G173800	C2	C2.enrich	TraesCS5A02G144000	C3	C3.enrich	MYB	GRAS
TraesCS6A02G173800	C2	C2.enrich	TraesCS6A02G007300	C3	C3.enrich	MYB	G2-like
TraesCS6A02G173800	C2	C2.enrich	TraesCS6B02G012800	C3	C3.enrich	MYB	G2-like
TraesCS6A02G173800	C2	C2.enrich	TraesCS1A02G193400	C3	C3.enrich	MYB	HD-ZIP
TraesCS6A02G173800	C2	C2.enrich	TraesCS6A02G011700	C3	C3.enrich	MYB	MIKC_MADS
TraesCS6A02G173800	C2	C2.enrich	TraesCS2A02G101900	C3	C3.enrich	MYB	NAC
TraesCS6A02G173800	C2	C2.enrich	TraesCS5B02G290200	C3	C3.enrich	MYB	NAC
TraesCS6A02G173800	C2	C2.enrich	TraesCS7D02G452500	C3	C3.enrich	MYB	NAC
TraesCS6A02G173800	C2	C2.enrich	TraesCS2B02G277300	C3	C3.enrich	MYB	G2-like
TraesCS6A02G173800	C2	C2.enrich	TraesCS3A02G245900	C3	C3.enrich	MYB	NAC
TraesCS6A02G173800	C2	C2.enrich	TraesCS4B02G385200	C3	C3.enrich	MYB	HD-ZIP
TraesCS6A02G173800	C2	C2.enrich	TraesCS6D02G011600	C3	C3.enrich	MYB	G2-like
TraesCS6A02G173800	C2	C2.enrich	TraesCS2A02G101400	C3	C3.enrich	MYB	NAC
TraesCS6A02G173800	C2	C2.enrich	TraesCS7D02G294400	C3	C3.enrich	MYB	G2-like
TraesCS6A02G173800	C2	C2.enrich	TraesCS5A02G441900	C3	C3.enrich	MYB	bHLH
TraesCS6A02G173800	C2	C2.enrich	TraesCS5B02G445900	C3	C3.enrich	MYB	bHLH
TraesCS6A02G173800	C2	C2.enrich	TraesCS5D02G258300	C3	C3.enrich	MYB	bHLH
TraesCS6A02G173800	C2	C2.enrich	TraesCS5D02G449200	C3	C3.enrich	MYB	bHLH
TraesCS6A02G173800	C2	C2.enrich	TraesCS5B02G141400	C3	C3.enrich	MYB	ZF-HD
TraesCS6A02G173800	C2	C2.enrich	TraesCS5D02G149400	C3	C3.enrich	MYB	ZF-HD
TraesCS6A02G173800	C2	C2.enrich	TraesCS6B02G322700	C3	C3.enrich	MYB	MIKC_MADS
TraesCS6A02G173800	C2	C2.enrich	TraesCS2D02G262100	C3	C3.enrich	MYB	WRKY
TraesCS6A02G173800	C2	C2.enrich	TraesCS4D02G178400	C3	C3.enrich	MYB	WRKY
TraesCS6A02G173800	C2	C2.enrich	TraesCS3B02G318300	C3	C3.enrich	MYB	MIKC_MADS
TraesCS6A02G173800	C2	C2.enrich	TraesCS2A02G311500	C3	C3.enrich	MYB	NAC
TraesCS6A02G173800	C2	C2.enrich	TraesCS4B02G079000	C3	C3.enrich	MYB	C2H2
TraesCS6A02G173800	C2	C2.enrich	TraesCS7B02G401400	C3	C3.enrich	MYB	AP2
TraesCS6A02G173800	C2	C2.enrich	TraesCS4A02G128100	C3	C3.enrich	MYB	WRKY
TraesCS6A02G173800	C2	C2.enrich	TraesCS2A02G338300	C3	C3.enrich	MYB	NAC
TraesCS6A02G173800	C2	C2.enrich	TraesCS2B02G542400	C3	C3.enrich	MYB	AP2
TraesCS6A02G173800	C2	C2.enrich	TraesCS6B02G269700	C3	C3.enrich	MYB	HD-ZIP
TraesCS6A02G173800	C2	C2.enrich	TraesCS6D02G273500	C3	C3.enrich	MYB	MIKC_MADS
TraesCS6A02G173800	C2	C2.enrich	TraesCS6B02G416300	C3	C3.enrich	MYB	NAC
TraesCS6A02G173800	C2	C2.enrich	TraesCS7D02G451700	C3	C3.enrich	MYB	NAC
TraesCS6A02G173800	C2	C2.enrich	TraesCS2B02G280300	C3	C3.enrich	MYB	WRKY
TraesCS6A02G173800	C2	C2.enrich	TraesCS2B02G376900	C3	C3.enrich	MYB	NAC
TraesCS6A02G173800	C2	C2.enrich	TraesCS6D02G237000	C3	C3.enrich	MYB	HD-ZIP
TraesCS6A02G173800	C2	C2.enrich	TraesCS3B02G273600	C3	C3.enrich	MYB	NAC
TraesCS6A02G173800	C2	C2.enrich	TraesCS2A02G488200	C3	C3.enrich	MYB	G2-like
TraesCS6A02G173800	C2	C2.enrich	TraesCS5B02G054200	C3	C3.enrich	MYB	NAC
TraesCS6A02G173800	C2	C2.enrich	TraesCS5A02G373100	C3	C3.enrich	MYB	WRKY
TraesCS6A02G173800	C2	C2.enrich	TraesCS1A02G264300	C3	C3.enrich	MYB	MIKC_MADS
TraesCS6A02G173800	C2	C2.enrich	TraesCS3B02G315600	C3	C3.enrich	MYB	WRKY
TraesCS6A02G173800	C2	C2.enrich	TraesCS3B02G457400	C3	C3.enrich	MYB	bHLH
TraesCS6A02G173800	C2	C2.enrich	TraesCS3D02G281900	C3	C3.enrich	MYB	WRKY
TraesCS6A02G173800	C2	C2.enrich	TraesCS5D02G283200	C3	C3.enrich	MYB	NAC
TraesCS6A02G173800	C2	C2.enrich	TraesCS5D02G286300	C3	C3.enrich	MYB	bHLH
TraesCS6A02G173800	C2	C2.enrich	TraesCS3D02G245500	C3	C3.enrich	MYB	NAC
TraesCS6A02G173800	C2	C2.enrich	TraesCS5A02G291200	C3	C3.enrich	MYB	NAC
TraesCS6A02G173800	C2	C2.enrich	TraesCS2A02G514200	C3	C3.enrich	MYB	AP2
TraesCS6A02G173800	C2	C2.enrich	TraesCS2B02G459800	C3	C3.enrich	MYB	G2-like
TraesCS6A02G173800	C2	C2.enrich	TraesCS5A02G250600	C3	C3.enrich	MYB	bHLH
TraesCS6A02G173800	C2	C2.enrich	TraesCS5A02G481300	C3	C3.enrich	MYB	GRAS
TraesCS6A02G173800	C2	C2.enrich	TraesCS2A02G261900	C3	C3.enrich	MYB	WRKY
TraesCS6A02G173800	C2	C2.enrich	TraesCS5A02G316800	C3	C3.enrich	MYB	HD-ZIP
TraesCS6B02G263800	C2	C2.enrich	TraesCS1A02G309200	C3	C3.enrich	ERF	G2-like
TraesCS6B02G263800	C2	C2.enrich	TraesCS1D02G429900	C3	C3.enrich	ERF	WRKY
TraesCS6B02G263800	C2	C2.enrich	TraesCS2A02G488200	C3	C3.enrich	ERF	G2-like
TraesCS6B02G263800	C2	C2.enrich	TraesCS2B02G459800	C3	C3.enrich	ERF	G2-like
TraesCS6B02G263800	C2	C2.enrich	TraesCS5B02G486900	C3	C3.enrich	ERF	AP2
TraesCS6B02G263800	C2	C2.enrich	TraesCS6A02G292300	C3	C3.enrich	ERF	MIKC_MADS
TraesCS6B02G263800	C2	C2.enrich	TraesCS1A02G264300	C3	C3.enrich	ERF	MIKC_MADS
TraesCS6B02G263800	C2	C2.enrich	TraesCS1D02G197300	C3	C3.enrich	ERF	HD-ZIP
TraesCS6B02G263800	C2	C2.enrich	TraesCS2B02G344000	C3	C3.enrich	ERF	MIKC_MADS
TraesCS6B02G263800	C2	C2.enrich	TraesCS3A02G312800	C3	C3.enrich	ERF	HD-ZIP
TraesCS6B02G263800	C2	C2.enrich	TraesCS3B02G497200	C3	C3.enrich	ERF	C2H2
TraesCS6B02G263800	C2	C2.enrich	TraesCS4B02G084700	C3	C3.enrich	ERF	HD-ZIP
TraesCS6B02G263800	C2	C2.enrich	TraesCS5B02G290200	C3	C3.enrich	ERF	NAC
TraesCS6B02G263800	C2	C2.enrich	TraesCS6A02G208900	C3	C3.enrich	ERF	NAC
TraesCS6B02G263800	C2	C2.enrich	TraesCS6B02G322700	C3	C3.enrich	ERF	MIKC_MADS
TraesCS6B02G263800	C2	C2.enrich	TraesCS6B02G012800	C3	C3.enrich	ERF	G2-like
TraesCS6B02G263800	C2	C2.enrich	TraesCS1A02G193400	C3	C3.enrich	ERF	HD-ZIP
TraesCS6B02G263800	C2	C2.enrich	TraesCS2B02G542400	C3	C3.enrich	ERF	AP2
TraesCS6B02G263800	C2	C2.enrich	TraesCS1D02G059200	C3	C3.enrich	ERF	AP2
TraesCS6B02G263800	C2	C2.enrich	TraesCS2B02G280300	C3	C3.enrich	ERF	WRKY
TraesCS6B02G263800	C2	C2.enrich	TraesCS2B02G378100	C3	C3.enrich	ERF	AP2
TraesCS6B02G263800	C2	C2.enrich	TraesCS5A02G250600	C3	C3.enrich	ERF	bHLH
TraesCS6B02G263800	C2	C2.enrich	TraesCS5B02G317400	C3	C3.enrich	ERF	HD-ZIP
TraesCS6B02G263800	C2	C2.enrich	TraesCS4B02G385200	C3	C3.enrich	ERF	HD-ZIP
TraesCS6B02G263800	C2	C2.enrich	TraesCS6A02G324500	C3	C3.enrich	ERF	HD-ZIP
TraesCS6B02G263800	C2	C2.enrich	TraesCS4B02G079000	C3	C3.enrich	ERF	C2H2
TraesCS6B02G263800	C2	C2.enrich	TraesCS5B02G054200	C3	C3.enrich	ERF	NAC
TraesCS6B02G263800	C2	C2.enrich	TraesCS6B02G269700	C3	C3.enrich	ERF	HD-ZIP
TraesCS6B02G263800	C2	C2.enrich	TraesCS6D02G237000	C3	C3.enrich	ERF	HD-ZIP
TraesCS6B02G263800	C2	C2.enrich	TraesCS1D02G429800	C3	C3.enrich	ERF	WRKY
TraesCS6B02G263800	C2	C2.enrich	TraesCS2B02G376900	C3	C3.enrich	ERF	NAC
TraesCS6B02G263800	C2	C2.enrich	TraesCS3D02G245500	C3	C3.enrich	ERF	NAC
TraesCS6B02G263800	C2	C2.enrich	TraesCS6A02G007300	C3	C3.enrich	ERF	G2-like
TraesCS6B02G263800	C2	C2.enrich	TraesCS7B02G401400	C3	C3.enrich	ERF	AP2
TraesCS6B02G263800	C2	C2.enrich	TraesCS3B02G457400	C3	C3.enrich	ERF	bHLH
TraesCS6B02G263800	C2	C2.enrich	TraesCS5D02G283200	C3	C3.enrich	ERF	NAC
TraesCS6B02G263800	C2	C2.enrich	TraesCS5D02G422300	C3	C3.enrich	ERF	GRAS
TraesCS6B02G263800	C2	C2.enrich	TraesCS5A02G481300	C3	C3.enrich	ERF	GRAS
TraesCS6B02G263800	C2	C2.enrich	TraesCS5B02G278600	C3	C3.enrich	ERF	bHLH
TraesCS6B02G263800	C2	C2.enrich	TraesCS5D02G286300	C3	C3.enrich	ERF	bHLH
TraesCS6B02G263800	C2	C2.enrich	TraesCS2B02G277300	C3	C3.enrich	ERF	G2-like
TraesCS6B02G263800	C2	C2.enrich	TraesCS2D02G262100	C3	C3.enrich	ERF	WRKY
TraesCS6B02G263800	C2	C2.enrich	TraesCS4D02G303500	C3	C3.enrich	ERF	HD-ZIP
TraesCS6B02G263800	C2	C2.enrich	TraesCS3B02G318300	C3	C3.enrich	ERF	MIKC_MADS
TraesCS6B02G263800	C2	C2.enrich	TraesCS6B02G411300	C3	C3.enrich	ERF	bHLH
TraesCS6B02G263800	C2	C2.enrich	TraesCS2A02G261900	C3	C3.enrich	ERF	WRKY
TraesCS6B02G263800	C2	C2.enrich	TraesCS6D02G011600	C3	C3.enrich	ERF	G2-like
TraesCS6B02G263800	C2	C2.enrich	TraesCS3B02G273600	C3	C3.enrich	ERF	NAC
TraesCS6B02G263800	C2	C2.enrich	TraesCS2D02G309800	C3	C3.enrich	ERF	NAC
TraesCS6B02G263800	C2	C2.enrich	TraesCS2D02G324700	C3	C3.enrich	ERF	NAC
TraesCS6B02G263800	C2	C2.enrich	TraesCS4A02G255800	C3	C3.enrich	ERF	bHLH
TraesCS6B02G263800	C2	C2.enrich	TraesCS5A02G279200	C3	C3.enrich	ERF	bHLH
TraesCS6B02G263800	C2	C2.enrich	TraesCS5A02G275900	C3	C3.enrich	ERF	NAC
TraesCS6B02G263800	C2	C2.enrich	TraesCS7D02G294400	C3	C3.enrich	ERF	G2-like
TraesCS6B02G263800	C2	C2.enrich	TraesCS7D02G451700	C3	C3.enrich	ERF	NAC
TraesCS6B02G263800	C2	C2.enrich	TraesCS4D02G178400	C3	C3.enrich	ERF	WRKY
TraesCS6B02G263800	C2	C2.enrich	TraesCS5A02G291200	C3	C3.enrich	ERF	NAC
TraesCS6B02G263800	C2	C2.enrich	TraesCS2A02G311500	C3	C3.enrich	ERF	NAC
TraesCS6B02G263800	C2	C2.enrich	TraesCS4B02G174000	C3	C3.enrich	ERF	NAC
TraesCS7B02G443900	C2	C2.enrich	TraesCS1A02G309200	C3	C3.enrich	MYB	G2-like
TraesCS7B02G443900	C2	C2.enrich	TraesCS1D02G429800	C3	C3.enrich	MYB	WRKY
TraesCS7B02G443900	C2	C2.enrich	TraesCS1D02G429900	C3	C3.enrich	MYB	WRKY
TraesCS7B02G443900	C2	C2.enrich	TraesCS3A02G312800	C3	C3.enrich	MYB	HD-ZIP
TraesCS7B02G443900	C2	C2.enrich	TraesCS3B02G410500	C3	C3.enrich	MYB	NAC
TraesCS7B02G443900	C2	C2.enrich	TraesCS4D02G243700	C3	C3.enrich	MYB	MIKC_MADS
TraesCS7B02G443900	C2	C2.enrich	TraesCS5A02G144000	C3	C3.enrich	MYB	GRAS
TraesCS7B02G443900	C2	C2.enrich	TraesCS6A02G007300	C3	C3.enrich	MYB	G2-like
TraesCS7B02G443900	C2	C2.enrich	TraesCS6B02G012800	C3	C3.enrich	MYB	G2-like
TraesCS7B02G443900	C2	C2.enrich	TraesCS1A02G193400	C3	C3.enrich	MYB	HD-ZIP
TraesCS7B02G443900	C2	C2.enrich	TraesCS6A02G011700	C3	C3.enrich	MYB	MIKC_MADS
TraesCS7B02G443900	C2	C2.enrich	TraesCS2A02G101900	C3	C3.enrich	MYB	NAC
TraesCS7B02G443900	C2	C2.enrich	TraesCS5B02G290200	C3	C3.enrich	MYB	NAC
TraesCS7B02G443900	C2	C2.enrich	TraesCS7D02G452500	C3	C3.enrich	MYB	NAC
TraesCS7B02G443900	C2	C2.enrich	TraesCS2B02G277300	C3	C3.enrich	MYB	G2-like
TraesCS7B02G443900	C2	C2.enrich	TraesCS3A02G245900	C3	C3.enrich	MYB	NAC
TraesCS7B02G443900	C2	C2.enrich	TraesCS4B02G385200	C3	C3.enrich	MYB	HD-ZIP
TraesCS7B02G443900	C2	C2.enrich	TraesCS6D02G011600	C3	C3.enrich	MYB	G2-like
TraesCS7B02G443900	C2	C2.enrich	TraesCS2A02G101400	C3	C3.enrich	MYB	NAC
TraesCS7B02G443900	C2	C2.enrich	TraesCS7D02G294400	C3	C3.enrich	MYB	G2-like
TraesCS7B02G443900	C2	C2.enrich	TraesCS5A02G441900	C3	C3.enrich	MYB	bHLH
TraesCS7B02G443900	C2	C2.enrich	TraesCS5B02G445900	C3	C3.enrich	MYB	bHLH
TraesCS7B02G443900	C2	C2.enrich	TraesCS5D02G258300	C3	C3.enrich	MYB	bHLH
TraesCS7B02G443900	C2	C2.enrich	TraesCS5D02G449200	C3	C3.enrich	MYB	bHLH
TraesCS7B02G443900	C2	C2.enrich	TraesCS5B02G141400	C3	C3.enrich	MYB	ZF-HD
TraesCS7B02G443900	C2	C2.enrich	TraesCS5D02G149400	C3	C3.enrich	MYB	ZF-HD
TraesCS7B02G443900	C2	C2.enrich	TraesCS6B02G322700	C3	C3.enrich	MYB	MIKC_MADS
TraesCS7B02G443900	C2	C2.enrich	TraesCS2D02G262100	C3	C3.enrich	MYB	WRKY
TraesCS7B02G443900	C2	C2.enrich	TraesCS4D02G178400	C3	C3.enrich	MYB	WRKY
TraesCS7B02G443900	C2	C2.enrich	TraesCS3B02G318300	C3	C3.enrich	MYB	MIKC_MADS
TraesCS7B02G443900	C2	C2.enrich	TraesCS2A02G311500	C3	C3.enrich	MYB	NAC
TraesCS7B02G443900	C2	C2.enrich	TraesCS4B02G079000	C3	C3.enrich	MYB	C2H2
TraesCS7B02G443900	C2	C2.enrich	TraesCS7B02G401400	C3	C3.enrich	MYB	AP2
TraesCS7B02G443900	C2	C2.enrich	TraesCS4A02G128100	C3	C3.enrich	MYB	WRKY
TraesCS7B02G443900	C2	C2.enrich	TraesCS2A02G338300	C3	C3.enrich	MYB	NAC
TraesCS7B02G443900	C2	C2.enrich	TraesCS2B02G542400	C3	C3.enrich	MYB	AP2
TraesCS7B02G443900	C2	C2.enrich	TraesCS6B02G269700	C3	C3.enrich	MYB	HD-ZIP
TraesCS7B02G443900	C2	C2.enrich	TraesCS6D02G273500	C3	C3.enrich	MYB	MIKC_MADS
TraesCS7B02G443900	C2	C2.enrich	TraesCS6B02G416300	C3	C3.enrich	MYB	NAC
TraesCS7B02G443900	C2	C2.enrich	TraesCS7D02G451700	C3	C3.enrich	MYB	NAC
TraesCS7B02G443900	C2	C2.enrich	TraesCS2B02G280300	C3	C3.enrich	MYB	WRKY
TraesCS7B02G443900	C2	C2.enrich	TraesCS2B02G376900	C3	C3.enrich	MYB	NAC
TraesCS7B02G443900	C2	C2.enrich	TraesCS6D02G237000	C3	C3.enrich	MYB	HD-ZIP
TraesCS7B02G443900	C2	C2.enrich	TraesCS3B02G273600	C3	C3.enrich	MYB	NAC
TraesCS7B02G443900	C2	C2.enrich	TraesCS2A02G488200	C3	C3.enrich	MYB	G2-like
TraesCS7B02G443900	C2	C2.enrich	TraesCS5B02G054200	C3	C3.enrich	MYB	NAC
TraesCS7B02G443900	C2	C2.enrich	TraesCS5A02G373100	C3	C3.enrich	MYB	WRKY
TraesCS7B02G443900	C2	C2.enrich	TraesCS1A02G264300	C3	C3.enrich	MYB	MIKC_MADS
TraesCS7B02G443900	C2	C2.enrich	TraesCS3B02G315600	C3	C3.enrich	MYB	WRKY
TraesCS7B02G443900	C2	C2.enrich	TraesCS3B02G457400	C3	C3.enrich	MYB	bHLH
TraesCS7B02G443900	C2	C2.enrich	TraesCS3D02G281900	C3	C3.enrich	MYB	WRKY
TraesCS7B02G443900	C2	C2.enrich	TraesCS5D02G283200	C3	C3.enrich	MYB	NAC
TraesCS7B02G443900	C2	C2.enrich	TraesCS5D02G286300	C3	C3.enrich	MYB	bHLH
TraesCS7B02G443900	C2	C2.enrich	TraesCS3D02G245500	C3	C3.enrich	MYB	NAC
TraesCS7B02G443900	C2	C2.enrich	TraesCS5A02G291200	C3	C3.enrich	MYB	NAC
TraesCS7B02G443900	C2	C2.enrich	TraesCS2A02G514200	C3	C3.enrich	MYB	AP2
TraesCS7B02G443900	C2	C2.enrich	TraesCS2B02G459800	C3	C3.enrich	MYB	G2-like
TraesCS7B02G443900	C2	C2.enrich	TraesCS5A02G250600	C3	C3.enrich	MYB	bHLH
TraesCS7B02G443900	C2	C2.enrich	TraesCS5A02G481300	C3	C3.enrich	MYB	GRAS
TraesCS7B02G443900	C2	C2.enrich	TraesCS2A02G261900	C3	C3.enrich	MYB	WRKY
TraesCS7B02G443900	C2	C2.enrich	TraesCS5A02G316800	C3	C3.enrich	MYB	HD-ZIP
TraesCS1A02G284000	C2	C2.enrich	TraesCS1A02G309200	C3	C3.enrich	MYB	G2-like
TraesCS1A02G284000	C2	C2.enrich	TraesCS1D02G429800	C3	C3.enrich	MYB	WRKY
TraesCS1A02G284000	C2	C2.enrich	TraesCS1D02G429900	C3	C3.enrich	MYB	WRKY
TraesCS1A02G284000	C2	C2.enrich	TraesCS3A02G312800	C3	C3.enrich	MYB	HD-ZIP
TraesCS1A02G284000	C2	C2.enrich	TraesCS3B02G410500	C3	C3.enrich	MYB	NAC
TraesCS1A02G284000	C2	C2.enrich	TraesCS4D02G243700	C3	C3.enrich	MYB	MIKC_MADS
TraesCS1A02G284000	C2	C2.enrich	TraesCS5A02G144000	C3	C3.enrich	MYB	GRAS
TraesCS1A02G284000	C2	C2.enrich	TraesCS6A02G007300	C3	C3.enrich	MYB	G2-like
TraesCS1A02G284000	C2	C2.enrich	TraesCS6B02G012800	C3	C3.enrich	MYB	G2-like
TraesCS1A02G284000	C2	C2.enrich	TraesCS1A02G193400	C3	C3.enrich	MYB	HD-ZIP
TraesCS1A02G284000	C2	C2.enrich	TraesCS6A02G011700	C3	C3.enrich	MYB	MIKC_MADS
TraesCS1A02G284000	C2	C2.enrich	TraesCS2A02G101900	C3	C3.enrich	MYB	NAC
TraesCS1A02G284000	C2	C2.enrich	TraesCS5B02G290200	C3	C3.enrich	MYB	NAC
TraesCS1A02G284000	C2	C2.enrich	TraesCS7D02G452500	C3	C3.enrich	MYB	NAC
TraesCS1A02G284000	C2	C2.enrich	TraesCS2B02G277300	C3	C3.enrich	MYB	G2-like
TraesCS1A02G284000	C2	C2.enrich	TraesCS3A02G245900	C3	C3.enrich	MYB	NAC
TraesCS1A02G284000	C2	C2.enrich	TraesCS4B02G385200	C3	C3.enrich	MYB	HD-ZIP
TraesCS1A02G284000	C2	C2.enrich	TraesCS6D02G011600	C3	C3.enrich	MYB	G2-like
TraesCS1A02G284000	C2	C2.enrich	TraesCS2A02G101400	C3	C3.enrich	MYB	NAC
TraesCS1A02G284000	C2	C2.enrich	TraesCS7D02G294400	C3	C3.enrich	MYB	G2-like
TraesCS1A02G284000	C2	C2.enrich	TraesCS5A02G441900	C3	C3.enrich	MYB	bHLH
TraesCS1A02G284000	C2	C2.enrich	TraesCS5B02G445900	C3	C3.enrich	MYB	bHLH
TraesCS1A02G284000	C2	C2.enrich	TraesCS5D02G258300	C3	C3.enrich	MYB	bHLH
TraesCS1A02G284000	C2	C2.enrich	TraesCS5D02G449200	C3	C3.enrich	MYB	bHLH
TraesCS1A02G284000	C2	C2.enrich	TraesCS5B02G141400	C3	C3.enrich	MYB	ZF-HD
TraesCS1A02G284000	C2	C2.enrich	TraesCS5D02G149400	C3	C3.enrich	MYB	ZF-HD
TraesCS1A02G284000	C2	C2.enrich	TraesCS6B02G322700	C3	C3.enrich	MYB	MIKC_MADS
TraesCS1A02G284000	C2	C2.enrich	TraesCS2D02G262100	C3	C3.enrich	MYB	WRKY
TraesCS1A02G284000	C2	C2.enrich	TraesCS4D02G178400	C3	C3.enrich	MYB	WRKY
TraesCS1A02G284000	C2	C2.enrich	TraesCS3B02G318300	C3	C3.enrich	MYB	MIKC_MADS
TraesCS1A02G284000	C2	C2.enrich	TraesCS2A02G311500	C3	C3.enrich	MYB	NAC
TraesCS1A02G284000	C2	C2.enrich	TraesCS4B02G079000	C3	C3.enrich	MYB	C2H2
TraesCS1A02G284000	C2	C2.enrich	TraesCS7B02G401400	C3	C3.enrich	MYB	AP2
TraesCS1A02G284000	C2	C2.enrich	TraesCS4A02G128100	C3	C3.enrich	MYB	WRKY
TraesCS1A02G284000	C2	C2.enrich	TraesCS1D02G197300	C3	C3.enrich	MYB	HD-ZIP
TraesCS1A02G284000	C2	C2.enrich	TraesCS2B02G344000	C3	C3.enrich	MYB	MIKC_MADS
TraesCS1A02G284000	C2	C2.enrich	TraesCS3D02G281900	C3	C3.enrich	MYB	WRKY
TraesCS1A02G284000	C2	C2.enrich	TraesCS5D02G323100	C3	C3.enrich	MYB	HD-ZIP
TraesCS1A02G284000	C2	C2.enrich	TraesCS6D02G237000	C3	C3.enrich	MYB	HD-ZIP
TraesCS1A02G284000	C2	C2.enrich	TraesCS2A02G338300	C3	C3.enrich	MYB	NAC
TraesCS1A02G284000	C2	C2.enrich	TraesCS2B02G542400	C3	C3.enrich	MYB	AP2
TraesCS1A02G284000	C2	C2.enrich	TraesCS6B02G269700	C3	C3.enrich	MYB	HD-ZIP
TraesCS1A02G284000	C2	C2.enrich	TraesCS6D02G273500	C3	C3.enrich	MYB	MIKC_MADS
TraesCS1A02G284000	C2	C2.enrich	TraesCS6B02G416300	C3	C3.enrich	MYB	NAC
TraesCS1A02G284000	C2	C2.enrich	TraesCS7D02G451700	C3	C3.enrich	MYB	NAC
TraesCS1A02G284000	C2	C2.enrich	TraesCS2B02G280300	C3	C3.enrich	MYB	WRKY
TraesCS1A02G284000	C2	C2.enrich	TraesCS2B02G376900	C3	C3.enrich	MYB	NAC
TraesCS1A02G284000	C2	C2.enrich	TraesCS3B02G273600	C3	C3.enrich	MYB	NAC
TraesCS1A02G284000	C2	C2.enrich	TraesCS2A02G488200	C3	C3.enrich	MYB	G2-like
TraesCS1A02G284000	C2	C2.enrich	TraesCS5B02G054200	C3	C3.enrich	MYB	NAC
TraesCS1A02G284000	C2	C2.enrich	TraesCS5A02G373100	C3	C3.enrich	MYB	WRKY
TraesCS1A02G284000	C2	C2.enrich	TraesCS1A02G264300	C3	C3.enrich	MYB	MIKC_MADS
TraesCS1A02G284000	C2	C2.enrich	TraesCS3B02G315600	C3	C3.enrich	MYB	WRKY
TraesCS1A02G284000	C2	C2.enrich	TraesCS3B02G457400	C3	C3.enrich	MYB	bHLH
TraesCS1A02G284000	C2	C2.enrich	TraesCS5D02G283200	C3	C3.enrich	MYB	NAC
TraesCS1A02G284000	C2	C2.enrich	TraesCS5D02G286300	C3	C3.enrich	MYB	bHLH
TraesCS1A02G284000	C2	C2.enrich	TraesCS3D02G245500	C3	C3.enrich	MYB	NAC
TraesCS1A02G284000	C2	C2.enrich	TraesCS5A02G291200	C3	C3.enrich	MYB	NAC
TraesCS1A02G284000	C2	C2.enrich	TraesCS2A02G514200	C3	C3.enrich	MYB	AP2
TraesCS1A02G284000	C2	C2.enrich	TraesCS2B02G459800	C3	C3.enrich	MYB	G2-like
TraesCS1A02G284000	C2	C2.enrich	TraesCS5A02G250600	C3	C3.enrich	MYB	bHLH
TraesCS1A02G284000	C2	C2.enrich	TraesCS5A02G481300	C3	C3.enrich	MYB	GRAS
TraesCS1A02G284000	C2	C2.enrich	TraesCS2A02G261900	C3	C3.enrich	MYB	WRKY
TraesCS1A02G284000	C2	C2.enrich	TraesCS5A02G316800	C3	C3.enrich	MYB	HD-ZIP
TraesCS3B02G156600	C2	C2.enrich	TraesCS1A02G058400	C3	C3.enrich	BES1	AP2
TraesCS3B02G156600	C2	C2.enrich	TraesCS1D02G197300	C3	C3.enrich	BES1	HD-ZIP
TraesCS3B02G156600	C2	C2.enrich	TraesCS1D02G429800	C3	C3.enrich	BES1	WRKY
TraesCS3B02G156600	C2	C2.enrich	TraesCS1D02G429900	C3	C3.enrich	BES1	WRKY
TraesCS3B02G156600	C2	C2.enrich	TraesCS2B02G376900	C3	C3.enrich	BES1	NAC
TraesCS3B02G156600	C2	C2.enrich	TraesCS4B02G079000	C3	C3.enrich	BES1	C2H2
TraesCS3B02G156600	C2	C2.enrich	TraesCS5B02G317400	C3	C3.enrich	BES1	HD-ZIP
TraesCS3B02G156600	C2	C2.enrich	TraesCS7B02G401400	C3	C3.enrich	BES1	AP2
TraesCS3B02G156600	C2	C2.enrich	TraesCS1A02G193400	C3	C3.enrich	BES1	HD-ZIP
TraesCS3B02G156600	C2	C2.enrich	TraesCS2B02G118200	C3	C3.enrich	BES1	NAC
TraesCS3B02G156600	C2	C2.enrich	TraesCS2D02G100900	C3	C3.enrich	BES1	NAC
TraesCS3B02G156600	C2	C2.enrich	TraesCS2A02G488200	C3	C3.enrich	BES1	G2-like
TraesCS3B02G156600	C2	C2.enrich	TraesCS3B02G273600	C3	C3.enrich	BES1	NAC
TraesCS3B02G156600	C2	C2.enrich	TraesCS2B02G328300	C3	C3.enrich	BES1	NAC
TraesCS3B02G156600	C2	C2.enrich	TraesCS3A02G312800	C3	C3.enrich	BES1	HD-ZIP
TraesCS4A02G035400	C2	C2.enrich	TraesCS1A02G309200	C3	C3.enrich	ERF	G2-like
TraesCS4A02G035400	C2	C2.enrich	TraesCS1D02G429900	C3	C3.enrich	ERF	WRKY
TraesCS4A02G035400	C2	C2.enrich	TraesCS2A02G488200	C3	C3.enrich	ERF	G2-like
TraesCS4A02G035400	C2	C2.enrich	TraesCS2B02G459800	C3	C3.enrich	ERF	G2-like
TraesCS4A02G035400	C2	C2.enrich	TraesCS5B02G486900	C3	C3.enrich	ERF	AP2
TraesCS4A02G035400	C2	C2.enrich	TraesCS6A02G292300	C3	C3.enrich	ERF	MIKC_MADS
TraesCS4A02G035400	C2	C2.enrich	TraesCS1A02G264300	C3	C3.enrich	ERF	MIKC_MADS
TraesCS4A02G035400	C2	C2.enrich	TraesCS1D02G197300	C3	C3.enrich	ERF	HD-ZIP
TraesCS4A02G035400	C2	C2.enrich	TraesCS2B02G344000	C3	C3.enrich	ERF	MIKC_MADS
TraesCS4A02G035400	C2	C2.enrich	TraesCS3A02G312800	C3	C3.enrich	ERF	HD-ZIP
TraesCS4A02G035400	C2	C2.enrich	TraesCS3B02G497200	C3	C3.enrich	ERF	C2H2
TraesCS4A02G035400	C2	C2.enrich	TraesCS4B02G084700	C3	C3.enrich	ERF	HD-ZIP
TraesCS4A02G035400	C2	C2.enrich	TraesCS5B02G290200	C3	C3.enrich	ERF	NAC
TraesCS4A02G035400	C2	C2.enrich	TraesCS6A02G208900	C3	C3.enrich	ERF	NAC
TraesCS4A02G035400	C2	C2.enrich	TraesCS6B02G322700	C3	C3.enrich	ERF	MIKC_MADS
TraesCS4A02G035400	C2	C2.enrich	TraesCS6B02G012800	C3	C3.enrich	ERF	G2-like
TraesCS4A02G035400	C2	C2.enrich	TraesCS1A02G193400	C3	C3.enrich	ERF	HD-ZIP
TraesCS4A02G035400	C2	C2.enrich	TraesCS2B02G542400	C3	C3.enrich	ERF	AP2
TraesCS4A02G035400	C2	C2.enrich	TraesCS1D02G059200	C3	C3.enrich	ERF	AP2
TraesCS4A02G035400	C2	C2.enrich	TraesCS2B02G280300	C3	C3.enrich	ERF	WRKY
TraesCS4A02G035400	C2	C2.enrich	TraesCS2B02G378100	C3	C3.enrich	ERF	AP2
TraesCS4A02G035400	C2	C2.enrich	TraesCS5A02G250600	C3	C3.enrich	ERF	bHLH
TraesCS4A02G035400	C2	C2.enrich	TraesCS5B02G317400	C3	C3.enrich	ERF	HD-ZIP
TraesCS4A02G035400	C2	C2.enrich	TraesCS4B02G385200	C3	C3.enrich	ERF	HD-ZIP
TraesCS4A02G035400	C2	C2.enrich	TraesCS6A02G324500	C3	C3.enrich	ERF	HD-ZIP
TraesCS4A02G035400	C2	C2.enrich	TraesCS4B02G079000	C3	C3.enrich	ERF	C2H2
TraesCS4A02G035400	C2	C2.enrich	TraesCS5B02G054200	C3	C3.enrich	ERF	NAC
TraesCS4A02G035400	C2	C2.enrich	TraesCS6B02G269700	C3	C3.enrich	ERF	HD-ZIP
TraesCS4A02G035400	C2	C2.enrich	TraesCS6D02G237000	C3	C3.enrich	ERF	HD-ZIP
TraesCS4A02G035400	C2	C2.enrich	TraesCS1D02G429800	C3	C3.enrich	ERF	WRKY
TraesCS4A02G035400	C2	C2.enrich	TraesCS2B02G376900	C3	C3.enrich	ERF	NAC
TraesCS4A02G035400	C2	C2.enrich	TraesCS3D02G245500	C3	C3.enrich	ERF	NAC
TraesCS4A02G035400	C2	C2.enrich	TraesCS6A02G007300	C3	C3.enrich	ERF	G2-like
TraesCS4A02G035400	C2	C2.enrich	TraesCS7B02G401400	C3	C3.enrich	ERF	AP2
TraesCS4A02G035400	C2	C2.enrich	TraesCS3B02G457400	C3	C3.enrich	ERF	bHLH
TraesCS4A02G035400	C2	C2.enrich	TraesCS5D02G283200	C3	C3.enrich	ERF	NAC
TraesCS4A02G035400	C2	C2.enrich	TraesCS5D02G422300	C3	C3.enrich	ERF	GRAS
TraesCS4A02G035400	C2	C2.enrich	TraesCS5A02G481300	C3	C3.enrich	ERF	GRAS
TraesCS4A02G035400	C2	C2.enrich	TraesCS5B02G278600	C3	C3.enrich	ERF	bHLH
TraesCS4A02G035400	C2	C2.enrich	TraesCS5D02G286300	C3	C3.enrich	ERF	bHLH
TraesCS4A02G035400	C2	C2.enrich	TraesCS2B02G277300	C3	C3.enrich	ERF	G2-like
TraesCS4A02G035400	C2	C2.enrich	TraesCS2D02G262100	C3	C3.enrich	ERF	WRKY
TraesCS4A02G035400	C2	C2.enrich	TraesCS4D02G303500	C3	C3.enrich	ERF	HD-ZIP
TraesCS4A02G035400	C2	C2.enrich	TraesCS3B02G318300	C3	C3.enrich	ERF	MIKC_MADS
TraesCS4A02G035400	C2	C2.enrich	TraesCS6B02G411300	C3	C3.enrich	ERF	bHLH
TraesCS4A02G035400	C2	C2.enrich	TraesCS2A02G261900	C3	C3.enrich	ERF	WRKY
TraesCS4A02G035400	C2	C2.enrich	TraesCS6D02G011600	C3	C3.enrich	ERF	G2-like
TraesCS4A02G035400	C2	C2.enrich	TraesCS3B02G273600	C3	C3.enrich	ERF	NAC
TraesCS4A02G035400	C2	C2.enrich	TraesCS2D02G309800	C3	C3.enrich	ERF	NAC
TraesCS4A02G035400	C2	C2.enrich	TraesCS2D02G324700	C3	C3.enrich	ERF	NAC
TraesCS4A02G035400	C2	C2.enrich	TraesCS4A02G255800	C3	C3.enrich	ERF	bHLH
TraesCS4A02G035400	C2	C2.enrich	TraesCS5A02G279200	C3	C3.enrich	ERF	bHLH
TraesCS4A02G035400	C2	C2.enrich	TraesCS5A02G275900	C3	C3.enrich	ERF	NAC
TraesCS4A02G035400	C2	C2.enrich	TraesCS7D02G294400	C3	C3.enrich	ERF	G2-like
TraesCS4A02G035400	C2	C2.enrich	TraesCS7D02G451700	C3	C3.enrich	ERF	NAC
TraesCS4A02G035400	C2	C2.enrich	TraesCS4D02G178400	C3	C3.enrich	ERF	WRKY
TraesCS4A02G035400	C2	C2.enrich	TraesCS5A02G291200	C3	C3.enrich	ERF	NAC
TraesCS4A02G035400	C2	C2.enrich	TraesCS2A02G311500	C3	C3.enrich	ERF	NAC
TraesCS4A02G035400	C2	C2.enrich	TraesCS4B02G174000	C3	C3.enrich	ERF	NAC
TraesCS6D02G162900	C2	C2.enrich	TraesCS1A02G309200	C3	C3.enrich	MYB	G2-like
TraesCS6D02G162900	C2	C2.enrich	TraesCS1D02G429800	C3	C3.enrich	MYB	WRKY
TraesCS6D02G162900	C2	C2.enrich	TraesCS1D02G429900	C3	C3.enrich	MYB	WRKY
TraesCS6D02G162900	C2	C2.enrich	TraesCS3A02G312800	C3	C3.enrich	MYB	HD-ZIP
TraesCS6D02G162900	C2	C2.enrich	TraesCS3B02G410500	C3	C3.enrich	MYB	NAC
TraesCS6D02G162900	C2	C2.enrich	TraesCS4D02G243700	C3	C3.enrich	MYB	MIKC_MADS
TraesCS6D02G162900	C2	C2.enrich	TraesCS5A02G144000	C3	C3.enrich	MYB	GRAS
[truncated: 2,213 more rows]

## Sheet: Table S17
Table S17. A network of transcription factors in regulatory mode type II.
[truncated: 1,958 more rows]

[truncated: 2 more sheets: Table S18, Table S19]
